# Supplementary material for: The TaBBM-TaWRKY41-TacAGPS1a module affects starch synthesis and grain quality by regulating embryo and endosperm development in wheat
Source: Research Square preprint supplement (doi:10.21203/rs.3.rs-8619315/v1), 2026-01-27
Supplement: Supplementary file 1 [file 0f26ddbbfd811101b4efdebf.xlsx]

## Sheet: Sheet1
Supplementary Data 2. List of starch synthesis genes in the 12 DAP grain RNA-seq.
Gene ID	Symbol	Fielder-G-1_fpkm	Fielder-G-2_fpkm	Fielder-G-3_fpkm	amiR-BBMs-G-1_fpkm	amiR-BBMs-G-2_fpkm	amiR-BBMs-G-3_fpkm
TraesCS1A02G419600	AGPase	196.71	164.57	185.37	345.48	359.45	355.23
TraesCS1B02G449700	AGPase	262.98	209.14	253.26	484.3	510.77	486.89
TraesCS1D02G427400	AGPase	310.33	256.73	303.13	615.33	654.99	619.51
TraesCS5A02G395200	AGPase	61.64	51.29	57.85	100.16	105.57	99.24
TraesCS5B02G484700	AGPase	5.58	6.62	6.01	5.2	4.48	4.43
TraesCS5D02G484500	AGPase	13.01	14.43	12.55	11.29	11.16	10.4
TraesCS7A02G287400	AGPase	596.07	500.85	541.36	768.02	775.87	734.42
TraesCS7B02G183300	AGPase	571.22	466.75	535.48	752.49	758.9	743.97
TraesCS7D02G284900	AGPase	982.42	798.31	885.24	1329.31	1325.38	1301.95
TraesCS7A02G070100	GBSS	127.27	117.25	120.74	213.76	218.21	247.05
TraesCS7D02G064300	GBSS	166.79	151.56	170.97	245.16	255.76	278.01
TraesCS2B02G390700	GBSS	3.77	4.58	3.52	3.69	2.85	3.58
TraesCS7A02G120300	SS	26.09	21.46	24.75	38.02	39.29	39.35
TraesCS7B02G018600	SS	59.32	58.96	61.97	104.93	111.01	92.51
TraesCS7D02G117800	SS	57.22	50.95	56	81.51	84.48	81.27
TraesCS7A02G189000	SS	44.32	41	46.26	83.64	84.83	87.58
TraesCS7B02G093800	SS	68.09	54.67	68.18	103.45	104.92	111.78
TraesCS7D02G190100	SS	72.6	63.21	73.4	110.97	112.78	119.89
TraesCS1A02G091500	SS	12.85	11.22	12.78	29.05	32.03	28.15
TraesCS1B02G119300	SS	18.39	14.2	17.2	38.13	42.37	36.56
TraesCS1D02G100100	SS	12.15	9.47	11.19	23.24	26.82	22.93
TraesCS7A02G549100	SBE	45.16	42.02	42.11	56.36	56.59	66.54
TraesCS7B02G472500	SBE	2.49	2.14	1.77	1.13	1.56	2.26
TraesCS7D02G535400	SBE	98.73	93.09	95.8	142.77	151.99	184.27
TraesCS2A02G293400	SBE	152.31	133.2	145.26	197.26	196.99	214.55
TraesCS2B02G309500	SBE	131.25	115.38	125	154.14	158.63	178.38
TraesCS2D02G290800	SBE	108.88	94.08	106.83	140.79	139.82	139.56
TraesCS2A02G310300	SBE	109.27	93.58	99.32	200.02	217.06	174.73
TraesCS2B02G327300	SBE	107.07	90.33	102.76	186.62	197.52	171.52
TraesCS2D02G308600	SBE	58.8	48.24	55.12	93.03	97.07	87.96
TraesCS7A02G251400	ISA	10.99	10.24	10.42	14.14	15.06	14.74
TraesCS7B02G139700	ISA	24.18	23.8	22.47	29.48	32.54	38.23
TraesCS7D02G249500	ISA	15.98	13.25	16.98	34.69	35.03	32.89
TraesCS1A02G247100	ISA	13.43	11.67	13.27	17.25	16.75	16.33
TraesCS1B02G257700	ISA	11.85	9.65	9.08	8	8.65	12.01
TraesCS1D02G246300	ISA	8.12	7.62	7.64	8.63	7.86	10.63
