# Supplementary material for: The TaBBM-TaWRKY41-TacAGPS1a module affects starch synthesis and grain quality by regulating embryo and endosperm development in wheat
Source: Research Square preprint supplement (doi:10.21203/rs.3.rs-8619315/v1), 2026-01-27
Supplement: Supplementary file 1 [file 2d7f901716da68611b188d8e.pdf]

**The TaBBM-TaWRKY41-TacAGPS1a module affects starch synthesis and grain  
quality by regulating embryo and endosperm development in wheat**

Li *et al.*

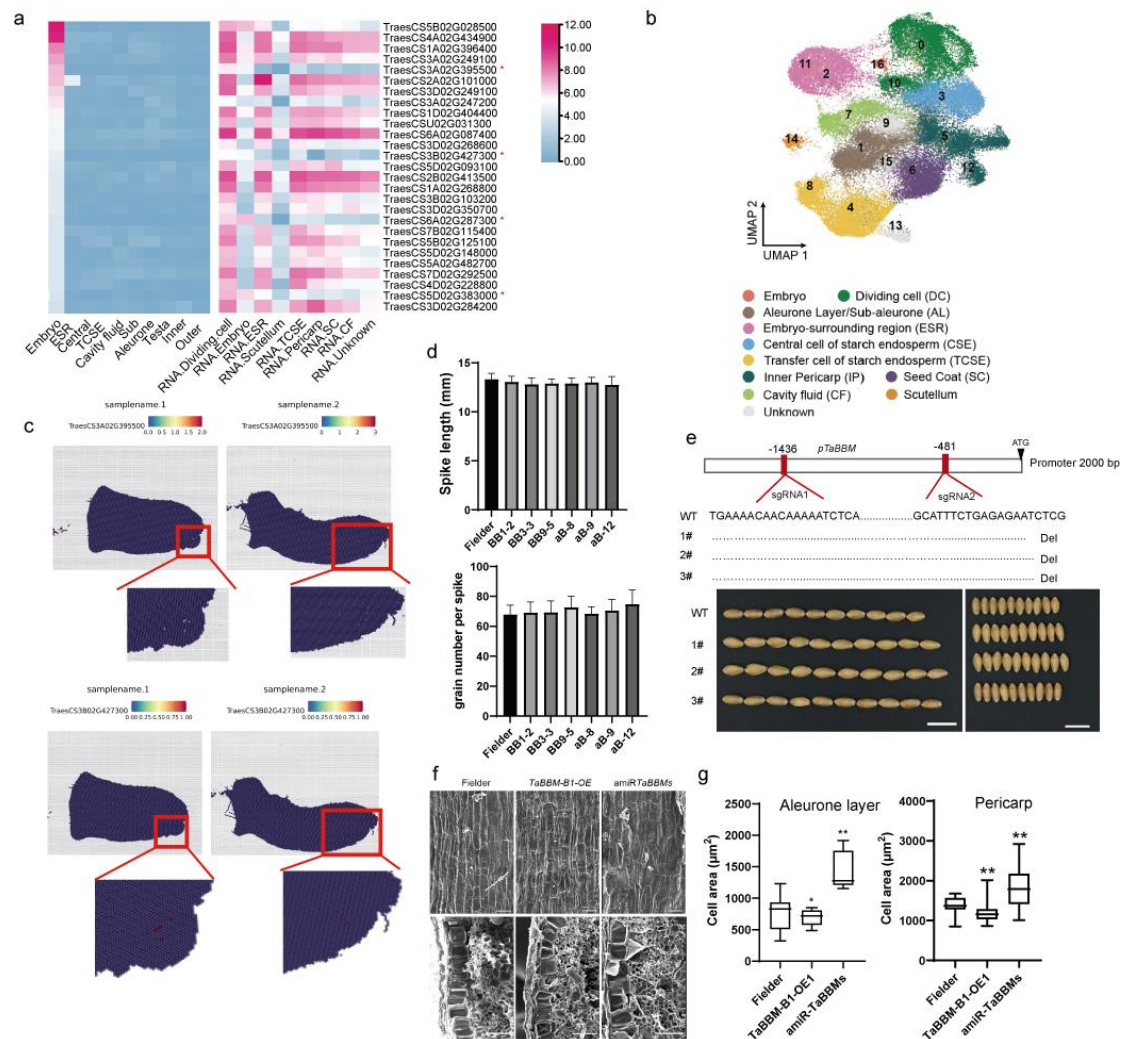

Supplementary Fig. 1 Identification of embryo and ESR expressed TF in wheat.

(a) The expression heatmap of ST and SN transcriptomics genes during grain development in wheat. The color of heatmap represents the normalized TPM value of genes expression. \*Possible candidate genes.

(b) Visualization of grain cell types (states) via UMAP. The dots indicate individual cells, while the colours represent the respective cell types.

(c) Representatives of spatial visualization using *TaBBM-A1* and *TaBBM-B1*.

(d) Spile length and grain number per spike between Fielder, *TaBBM-B1*-OE and amiR-*TaBBMs* plants. Values are means  $\pm$  SD from six independent biological replicates, and *P*-values were determined using two-tailed Student's *t*-test. \*\**P* < 0.01.

(e) CRISPR/Cas9 target sites in *TaBBM-B1* and sequencing confirmation of mutant. The symbols “-” indicate the nucleotide deletion, base numbers of deletion are shown behind. Representative seed morphology images of *tabbm*-KO and WT(Fielder). Bars = 1cm.

(f) The histological section of aleurone layer and pericarp. Scale bar = 50  $\mu$ m.

(g) Statistical results of aleurone layer and pericarp cells area. For each sample, at least 15 cells were analyzed. \*: *P* < 0.05, \*\*: *P* < 0.01.

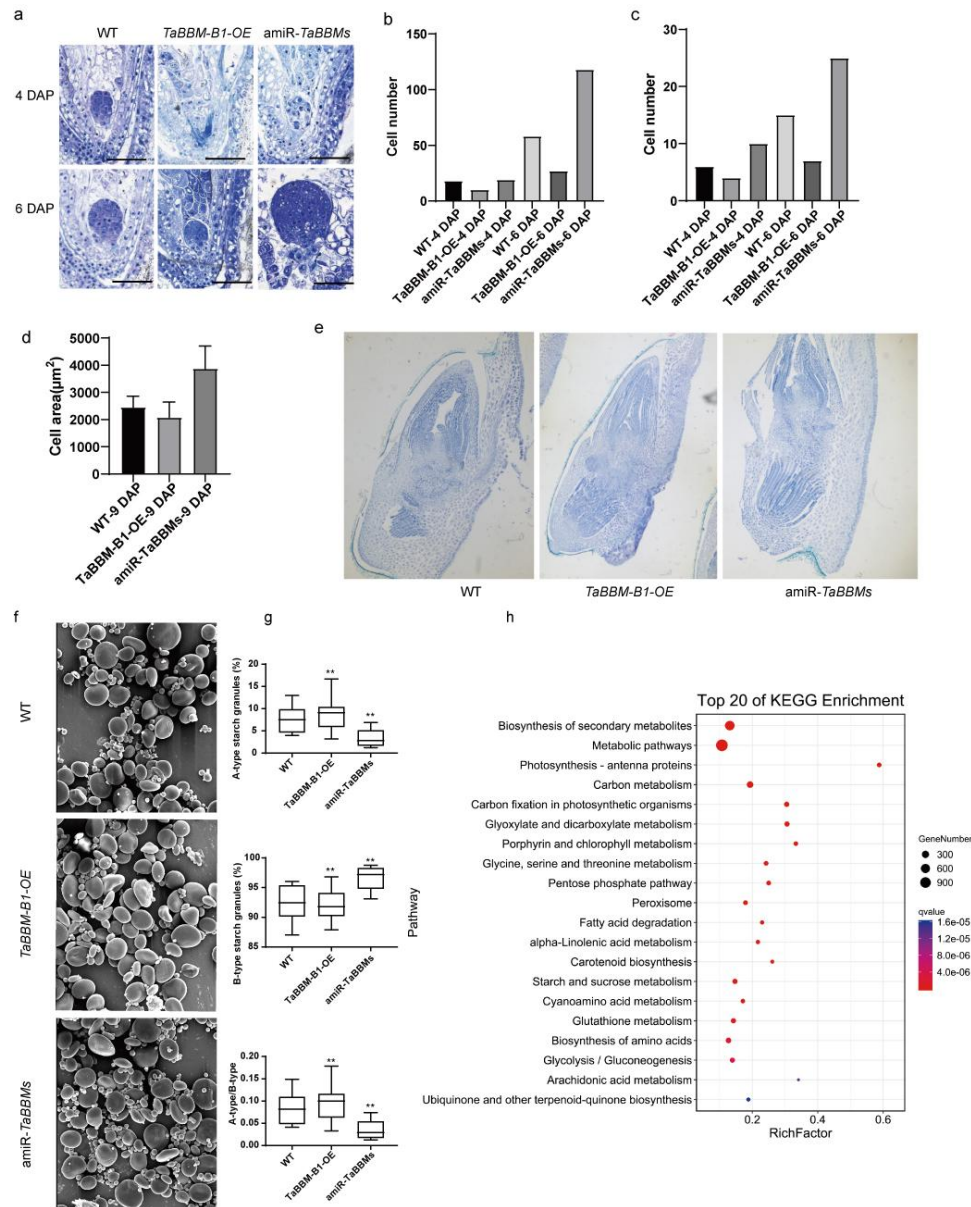

Supplementary Fig. 2 Phenotypic analysis of Fielder, *TaBBM-B1-OE* and *amiR-TaBBMs* embryo.

- (a) Light microscopy observations of Fielder, *TaBBM-B1-OE* and *amiR-TaBBMs* embryo during grain development. Scale bar = 100  $\mu$ m.
- (b) Cell number of Fielder, *TaBBM-B1-OE* and *amiR-TaBBMs* early embryo.
- (c) Dividing cell number of Fielder, *TaBBM-B1-OE* and *amiR-TaBBMs* early embryo.
- (d) Cell area of Fielder, *TaBBM-B1-OE* and *amiR-TaBBMs* 9 DAP embryo.
- (e) Light microscopy observations of Fielder, *TaBBM-B1-OE* and *amiR-TaBBMs* mature embryo. Scale bar = 100  $\mu$ m.
- (f) Scanning electron micrographs of purified endosperm starch. Bar = 10  $\mu$ m.
- (g) A-type and B-type granule volume (% of total starch), plots show the mean from the analysis of n = 5 to 3 replicate starch extractions, each from grains from a separate plant.
- (h) KEGG enrichment analysis of common DEGs in *amiR-TaBBMs*. FDR, false discovery rate; DEGs, differential expressed genes.

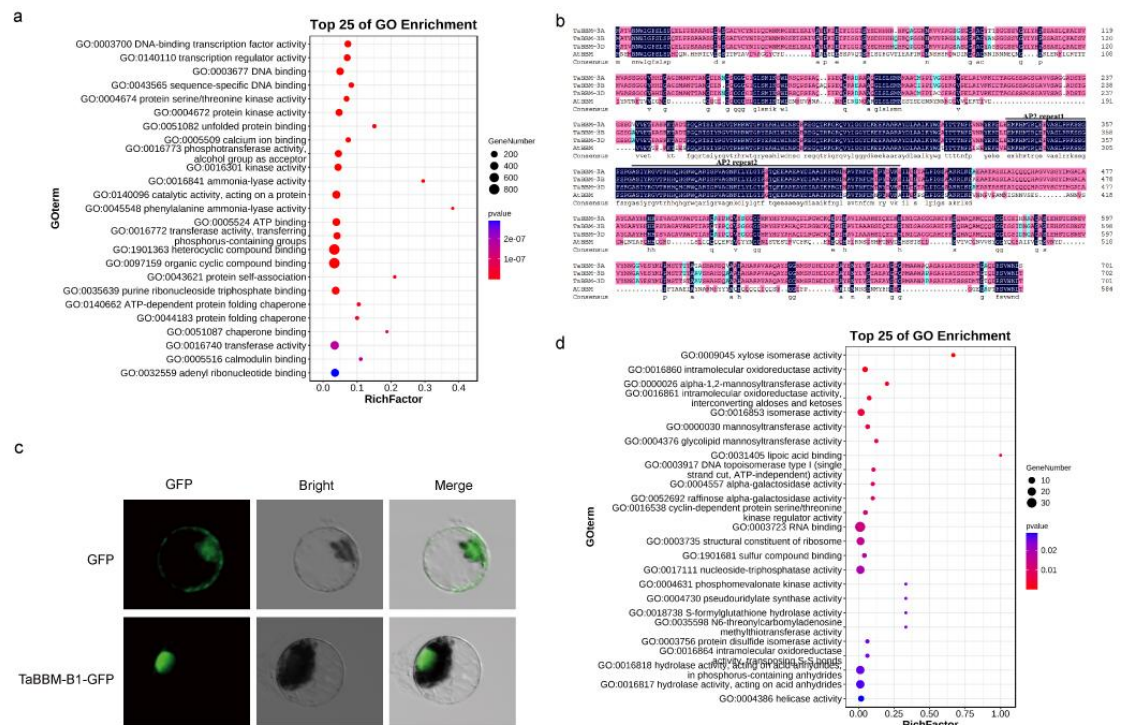

Supplementary Fig. 3 Overview of RNA-seq data for Fielder, *TaBBM-B1*-OE and amiR-*TaBBMs* embryo.

(a) GO enrichment analysis of common DEGs in *TaBBM-B1*-OE and amiR-*TaBBMs*. FDR, false discovery rate; DEGs, differential expressed genes. Venn diagram showing overlapping DEGs between *TaBBM-B1*-OE and amiR-*TaBBMs* genotypes.

(b) Alignment of TaBBMs and AtBBM amino acid sequences..

(c) Subcellular localization of TaBBM-B1. GFP and TaBBM-B1-GFP fusions under the control of the Cauliflower mosaic virus 35S promoter were transiently expressed in wheat proplasts. Eighteen hours after transformation, the fluorescence signal of GFP was observed under a confocal laser scanning microscope. GFP (green), bright-field images, and an overlay of the merged fluorescence are shown in each panel. Scale bar=10  $\mu$ m.

(d) GO enrichment analysis of common DEGs in TaBBM-B1 DAP-seq. FDR, false discovery rate; DEGs, differential expressed genes.



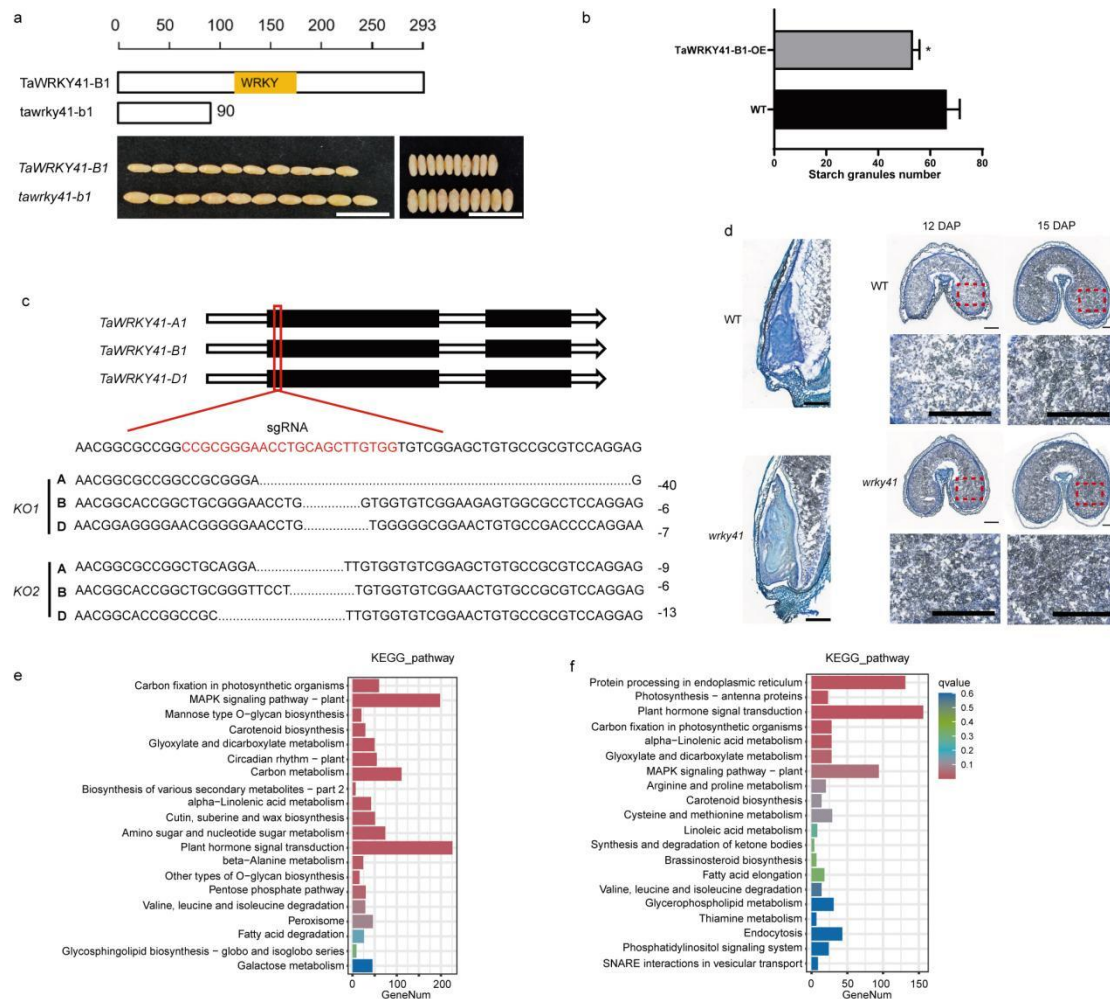

Supplementary Fig. 4 *TaWRKY41-B1* negatively regulates wheat grain size.

- (a) (d) Mature seeds of wild type (WT) and tabbm double mutant plants. Scale bar = 1 cm.
- (b) The triangles represent starch granules, the number was manually calculated per 75  $\mu\text{m}^2$ . Scale bar, 100  $\mu\text{m}$ . The data are shown as mean  $\pm$  SD (n = 10). Statistical significance was determined by Student's *t* test. \*,  $P < 0.05$ ; \*\*,  $P < 0.01$ .
- (c) Schematic of *TaWRKY41* homeolog genomic structures showing the target sites and PAMs for single guide RNAs used for mutagenesis by CRISPR-Cas9 in the Fielder background. Sequences of Fielder and two recovered mutant alleles (designated KO1 and KO2) are shown (bottom).
- (d) Light microscopy observations of Fielder and *TaWRKY41*-KO grain during grain development. Scale bar = 200  $\mu\text{m}$ .
- (e) KEGG enrichment analysis of common DEGs in *TaWRKY41*-B1-OE 8 DAP grain. FDR, false discovery rate; DEGs, differential expressed genes.
- (f) KEGG enrichment analysis of common DEGs in *TaWRKY41*-B1-OE 12 DAP grain. FDR, false discovery rate; DEGs, differential expressed genes.

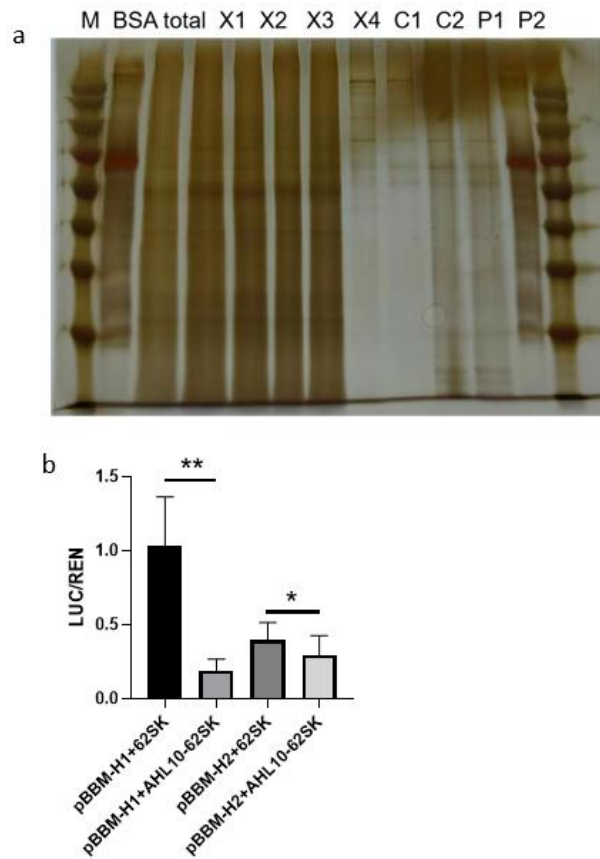

Supplementary Fig. 5 Screening of upstream regulatory transcription factors of *TaBBM-B1*.

(a) Promoter Pull-Down Assay. Scale bar = 1 cm. M: maker, Total: Total protein, X1-X4: wash, C1-C2: empty vector, P1-P2: *TaBBM-B1* promoter.

(b) Transient expression assays in *N. benthamiana* leaves show that *TaAHL10-B1* suppresses *TaBBM-B1*. Relative luciferase activity is expressed as the LUC/REN ratio.

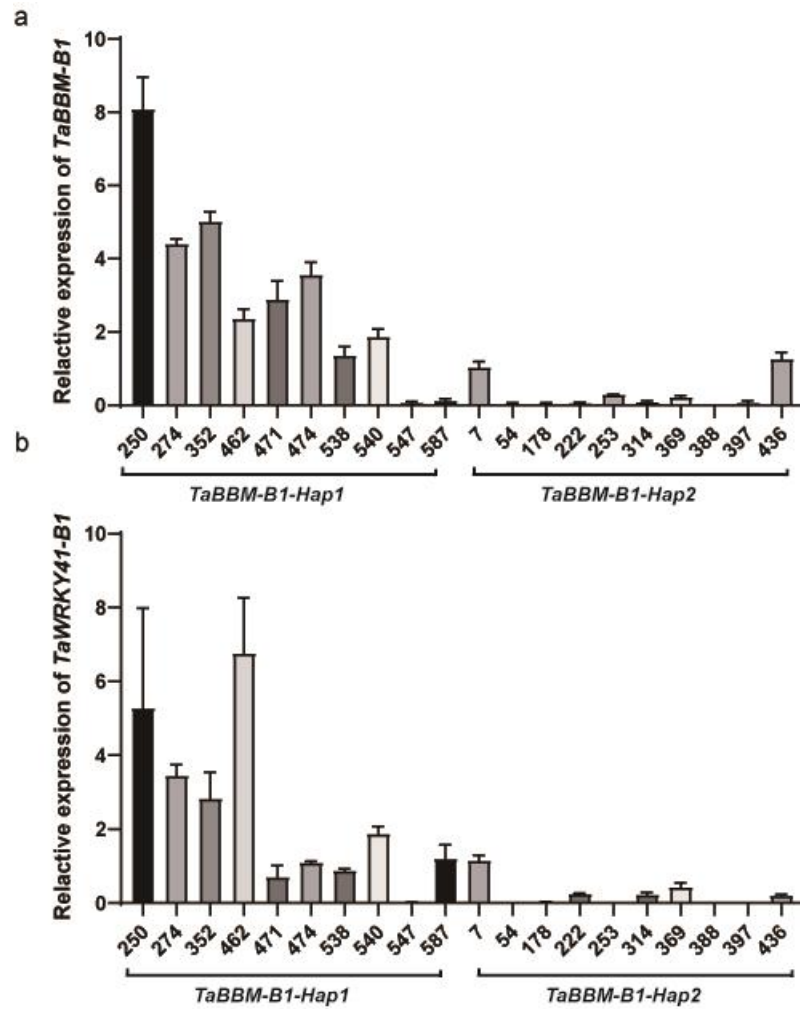

Supplementary Fig. 6 Expression in *TaBBM-B1-Hap1* and *TaBBM-B1-Hap2* alleles.

(a) The *TaBBM-B1* relative expression of *TaBBM-B1-Hap1* and *TaBBM-B1-Hap2* alleles were analyzed in natural germplasm at the 4 DAP grain. Values are presented as means  $\pm$  SDs (n=3).

(b) The *TaWRKY41-B1* relative expression of *TaBBM-B1-Hap1* and *TaBBM-B1-Hap2* alleles were analyzed in natural germplasm at the 4 DAP grain. Values are presented as means  $\pm$  SDs (n=3).

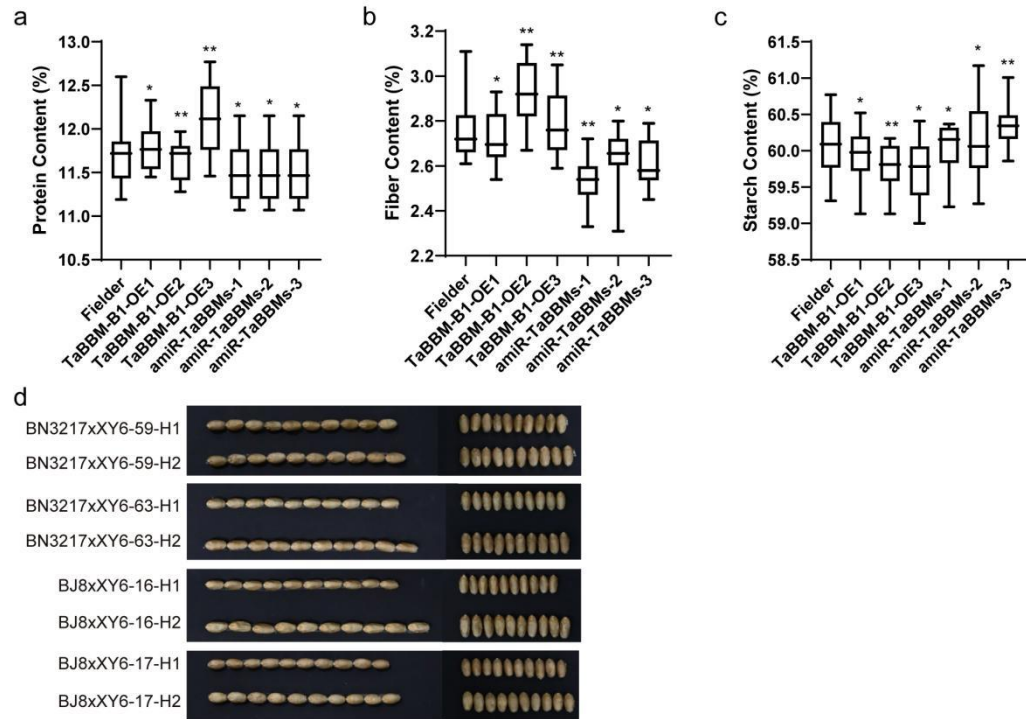

Supplementary Fig. 7 TaBBM-B1 regulates wheat grain quality.

(a-c) Quantification of grain agronomic traits related traits between the WT plants, *TaBBM-B1*-OE and amiRTaBBMs lines. Student's t-test was used to determine the difference significance between WT, *TaBBM-B1*-OE and amiR-*TaBBMs*. \*,  $P \leq 0.05$ , \*\*,  $P \leq 0.01$ , Data represent mean $\pm$ SD (n = 15 biological replicates).

(d) Recombinant inbred line grain size. Scale bar = 1 cm.
