# Supplementary material for: The TaBBM-TaWRKY41-TacAGPS1a module affects starch synthesis and grain quality by regulating embryo and endosperm development in wheat
Source: Research Square preprint supplement (doi:10.21203/rs.3.rs-8619315/v1), 2026-01-27
Supplement: Supplementary file 2 [file 1cc90d589f9fa855255dbd81.xlsx]

## Sheet: Sheet1
Supplementary Data 8.DNA pull down identified TFs.
Checked	Protein FDR Confidence: Combined	Master	Accession	Description	Exp. q-value: Combined	Sum PEP Score	Coverage [%]	# Peptides	# PSMs	# Unique Peptides	# AAs	MW [kDa]	calc. pI	Score Sequest HT: Sequest HT	# Peptides (by Search Engine): Sequest HT	Found in Sample: [S3] F3: Sample	# Protein Groups
FALSE	High	Master Protein	TraesCS3B01G532000.1	Acetyl-CoA carboxylase AT1G36180.1	0	384.068	47	91	336	6	2261	251.6	6.43	960.89	91	High	1
FALSE	High	Master Protein	TraesCS2D01G068100.1	Acetyl-CoA carboxylase AT1G36160.1	0	377.851	47	93	313	5	2311	254.8	6.16	931.71	93	High	1
FALSE	High	Master Protein	TraesCS2B01G082500.1	Acetyl-CoA carboxylase AT1G36160.1	0	373.508	46	93	316	3	2311	254.9	6.13	951.04	93	High	1
FALSE	High	Master Protein	TraesCS3D01G479900.1	Acetyl-CoA carboxylase AT1G36180.1	0	370.926	46	88	331	1	2258	251.1	6.43	952.56	88	High	1
FALSE	High	Master Protein	TraesCS3A01G484800.1	Acetyl-CoA carboxylase AT1G36180.1	0	357.867	46	87	322	4	2260	251.2	6.44	922.59	87	High	1
FALSE	High	Master Protein	TraesCS2A01G069400.1	Acetyl-CoA carboxylase AT1G36160.1	0	355.346	45	89	293	3	2311	254.8	6.15	882.87	89	High	1
FALSE	High	Master Protein	TRIAE_CS42_7AS_TGACv1_569748_AA1823240.1	Acetyl-coenzyme A carboxylase carboxyl transferase subunit alpha	0	106.67	44	21	58	2	565	60	8.22	195.19	21	High	1
FALSE	High	Master Protein	TraesCS7D02G096600	Acetyl-coenzyme A carboxylase carboxyl transferase subunit alpha	0	105.415	40	21	58	2	628	67.3	8.9	197.96	21	High	1
FALSE	High	Master Protein	TraesCS5D01G510500.1	Acetyl-CoA carboxylase AT1G36180.1	0	101.997	13	25	94	1	2233	248.3	6.54	274.18	25	High	1
FALSE	High	Master Protein	TraesCS4A01G401400.1	Acetyl-coenzyme A carboxylase carboxyl transferase subunit alpha AT4G34030.1	0	99.72	40	19	51	2	567	60.2	8.34	181.29	19	High	1
FALSE	High	Master Protein	TraesCS5D02G065000	Epoxide hydrolase 2	0	94.727	39	26	85	3	740	81.3	6.84	236.07	26	High	1
FALSE	High	Master Protein	TraesCS5A01G053700.1	Acetyl-CoA carboxylase, putative AT1G03090.2	0	91.518	38	25	82	1	738	81.3	6.73	232.61	25	High	1
FALSE	High	Master Protein	TraesCS5D01G065100.3	Acetyl-CoA carboxylase, putative AT1G03090.2	0	78.338	36	24	79	2	741	81.1	6.76	215.5	24	High	1
FALSE	High	Master Protein	TraesCS4A01G319800.1	ATP-dependent DNA helicase 2 subunit KU80 AT1G48050.1	0	29.107	21	12	15	4	744	84.6	8.15	33.26	12	High	1
FALSE	High	Master Protein	TraesCS2D01G678200LC.1	Ribulose bisphosphate carboxylase large chain	0	28.96	20	10	18	10	477	52.9	6.9	31.65	10	High	1
FALSE	High	Master Protein	TraesCS5B01G559300.3	ATP-dependent DNA helicase 2 subunit KU80 AT1G48050.1	0	28.532	24	14	16	6	739	83.9	8.15	35.68	14	High	1
FALSE	High	Master Protein	TraesCS5D02G062500	ATP-dependent DNA helicase 2 subunit KU70	0	20.738	12	6	10	6	717	80.1	6.47	26.49	6	High	1
FALSE	High	Master Protein	TraesCS2B02G436500	Histone H4	0	18.4	51	6	15	1	147	16.4	11.53	38.24	6	High	1
FALSE	High	Master Protein	TraesCS6A02G213700Glyceraldehyde-3-phosphate dehydrogenase	Histone H4	0	18.281	28	7	7	5	368	39.6	7.69	22.37	7	High	1
FALSE	High	Master Protein	TraesCS2D02G415000	Histone H4	0	18.089	47	6	15	1	137	15.2	11.65	36.4	6	High	1
FALSE	High	Master Protein	TraesCS5A01G204700.1	HMG-Y-related protein A	0	17.376	21	4	7	1	189	19.4	10.36	21.01	4	High	1
FALSE	High	Master Protein	TraesCS7B02G213300	Glyceraldehyde-3-phosphate dehydrogenase	0	16.649	23	5	5	3	337	36.5	7.18	18.54	5	High	1
FALSE	High	Master Protein	TraesCS7D02G538400High mobility group protein	TRIAE_CS42_7AL_TGACv1_556210_AA1758400.3	0	16.112	18	3	7	3	171	18.3	6.92	26.26	3	High	1
FALSE	High	Master Protein	TraesCS2A01G344600.1	Glyceraldehyde-3-phosphate dehydrogenase AT1G12900.1	0	15.937	20	6	8	4	401	42.7	7.4	21.43	6	High	1
FALSE	High	Master Protein	TraesCS4A01G177500.1	Ribulose bisphosphate carboxylase/oxygenase activase AT2G39730.1	0	15.543	19	6	7	6	464	50.9	7.3	19.16	6	High	1
FALSE	High	Master Protein	TraesCS3B02G312900	Poly [ADP-ribose] polymerase	0	15.27	15	7	7	7	591	64.4	7.8	15.25	7	High	1
FALSE	High	Master Protein	TraesCS7D02G297500	DNA topoisomerase 1	0	15.263	11	9	10	2	972	108.7	9.41	20.03	9	High	1
FALSE	High	Master Protein	TraesCS4B02G260600	40S ribosomal protein S3a	0	14.589	22	6	6	1	263	30	9.79	15.68	6	High	1
FALSE	High	Master Protein	TraesCS5A01G390500.1	HMG-Y-related protein A AT1G48620.1	0	14.551	28	6	10	4	173	18.4	10.39	23.6	6	High	1
FALSE	High	Master Protein	TraesCS7D02G297500	DNA topoisomerase 1	0	14.546	11	9	11	1	948	105.5	9.41	21.23	9	High	1
FALSE	High	Master Protein	TraesCS3A01G194200.2	ATP-dependent RNA helicase DB10 AT3G01540.2	0	14.265	10	6	6	6	778	86.4	10.02	17.99	6	High	1
FALSE	High	Master Protein	TraesCS7D02G297500	DNA topoisomerase 1	0	14.035	10	8	10	1	949	105.9	9.39	19.51	8	High	1
FALSE	High	Master Protein	TraesCS5D01G211400.1	HMG-Y-related protein A	0	13.938	20	5	7	2	189	19.4	10.3	18.84	5	High	1
FALSE	High	Master Protein	TraesCS4D02G260400	40S ribosomal protein S3a	0	13.584	22	6	6	1	263	29.9	9.79	15.7	6	High	1
FALSE	High	Master Protein	TRIAE_CS42_5BL_TGACv1_404253_AA1292440.1	TRIAE_CS42_5BL_TGACv1_404253_AA1292440.1	0	12.655	21	5	7	2	189	19.3	10.43	18.31	5	High	1
FALSE	High	Master Protein	TraesCS1D01G194900.2	AT hook motif DNA-binding family protein AT2G33620.1	0	12.287	12	4	4	2	454	47.1	9.57	12.58	4	High	1
FALSE	High	Master Protein	TraesCS1A01G020500.2	Actin AT5G09810.1	0	12.279	16	5	5	2	407	45.2	5.26	12.48	5	High	1
FALSE	High	Master Protein	TraesCS7D01G247300.2	AT hook motif DNA-binding family protein AT2G33620.1	0	12.151	23	5	6	5	370	36.7	10.42	16.96	5	High	1
FALSE	High	Master Protein	TraesCS4B02G323000	Glyceraldehyde-3-phosphate dehydrogenase	0	12.119	17	7	8	1	444	46.9	6.47	14.09	7	High	1
FALSE	High	Master Protein	TraesCS4B01G323000.1	Glyceraldehyde-3-phosphate dehydrogenase AT1G42970.1	0	12.045	17	7	8	1	444	46.9	6.47	15.76	7	High	1
FALSE	High	Master Protein	TraesCS3D01G053400.1	Photosystem II CP47 reaction center protein ATCG00680.1	0	11.688	14	4	4	4	385	42.7	6.46	11.31	4	High	1
FALSE	High	Master Protein	TraesCS4A01G264400.3	Actin AT3G12110.1	0	11.438	17	5	6	2	392	43.3	5.78	13.3	5	High	1
FALSE	High	Master Protein	TraesCS5D01G576800LC.1	40S ribosomal protein S26	0	11.062	27	2	3	1	144	15.7	11.03	13.07	2	High	1
FALSE	High	Master Protein	TraesCS1B01G364500.3	Tubulin alpha chain AT4G14960.2	0	10.632	14	4	6	4	451	49.7	5.02	12.05	4	High	1
FALSE	High	Master Protein	TraesCS5A01G078000.1	70 kDa heat shock protein AT3G12580.1	0	10.534	11	5	6	5	647	71	5.19	14.18	5	High	1
FALSE	High	Master Protein	TraesCS2A01G101700.2	Ricin B-like lectin R40G2 AT2G39050.1	0	10.393	17	5	6	5	373	41.5	6.92	14.89	5	High	1
FALSE	High	Master Protein	TraesCS6A01G385700.1	50S ribosomal protein L14 AT1G04480.1	0	9.705	33	4	7	4	140	15	10.48	14.85	4	High	1
FALSE	High	Master Protein	TraesCS2B02G127700	Acyl-CoA dehydrogenase	0	9.556	5	4	4	4	859	95.2	8.34	8.39	4	High	1
FALSE	High	Master Protein	TraesCS5A01G024900.2	5-methyltetrahydropteroyltriglutamate--homocysteine methyltransferase AT5G17920.1	0	9.48	6	4	6	4	807	89.2	6.4	10.11	4	High	1
FALSE	High	Master Protein	TraesCS2D02G111100	60S ribosomal protein L22, putative	0	9.263	34	5	7	5	130	14.5	9.55	16.77	5	High	1
FALSE	High	Master Protein	TraesCS1A01G105400.1	Ubiquitin AT2G47110.1	0	8.911	22	3	11	2	155	17.6	9.8	26.68	3	High	1
FALSE	High	Master Protein	TraesCS5D01G465100.1	ATP dependent RNA helicase AT2G42520.1	0	8.899	8	4	5	3	636	67.2	7.56	11.09	4	High	1
FALSE	High	Master Protein	TraesCS5B02G448500	Histone H1	0	8.672	12	6	11	5	287	30	11.28	20.1	6	High	1
FALSE	High	Master Protein	TraesCS1A01G363700.1	60S ribosomal protein l28 AT2G19730.1	0	8.42	20	4	5	1	197	22	10.43	9.07	4	High	1
FALSE	High	Master Protein	TraesCS6A02G248000	S-adenosylmethionine synthase	0	8.37	7	2	5	2	406	44.3	6.18	14.07	2	High	1
FALSE	High	Master Protein	TRIAE_CS42_6BL_TGACv1_500075_AA1598290.2	TRIAE_CS42_6BL_TGACv1_500075_AA1598290.2	0	7.958	10	4	5	2	391	42.8	9.67	10.61	4	High	1
FALSE	High	Master Protein	TraesCS1A02G379000	ATP synthase subunit beta	0	7.851	11	4	4	3	613	65.7	7.4	9.17	4	High	1
FALSE	High	Master Protein	TraesCS2B01G197200.1	50S ribosomal protein L15 AT1G23290.1	0	7.823	21	2	3	1	145	16	10.67	9.91	2	High	1
FALSE	High	Master Protein	TraesCS2A01G254600.3	Oxygen-evolving enhancer protein 2-1, chloroplastic AT1G06680.1	0	7.644	16	2	3	2	259	27.2	8.47	7.82	2	High	1
FALSE	High	Master Protein	TraesCS1B02G127200	60S ribosomal protein L18	0	7.448	15	2	2	2	188	21.3	11.49	6.22	2	High	1
FALSE	High	Master Protein	TraesCS2B02G470900	AT hook motif DNA-binding family protein	0	7.418	10	3	3	1	412	41.8	9.11	7.88	3	High	1
FALSE	High	Master Protein	TraesCS6A02G400300	rRNA 2'-O-methyltransferase fibrillarin 2	0	7.205	16	3	4	3	309	32.4	10.08	8.01	3	High	1
FALSE	High	Master Protein	TraesCS5A02G414400	Photosystem I reaction center subunit III	0	7.147	11	2	3	2	329	35	9.94	9.58	2	High	1
FALSE	High	Master Protein	TraesCS2A01G170800.1	50S ribosomal protein L15 AT1G23290.1	0	6.81	21	2	4	1	145	16	10.67	11.66	2	High	1
FALSE	High	Master Protein	TraesCS3D01G383700.1	Fructose-bisphosphate aldolase AT2G36460.1	0	6.546	8	2	2	2	358	38.8	7.21	5.93	2	High	1
FALSE	High	Master Protein	TraesCS1B02G380800	60S ribosomal protein l28 AT2G19730.1	0	6.527	27	4	5	1	147	16.6	10.32	5.97	4	High	1
FALSE	High	Master Protein	TraesCS3D02G330500	ADP-ribosylation factor family protein AT4G02080.1	0	6.496	13	3	4	3	273	30.7	9.66	6.72	3	High	1
FALSE	High	Master Protein	TraesCS7D01G454200.1	Tubulin beta chain AT5G62690.1	0	6.411	6	2	2	2	446	50.2	4.81	5.55	2	High	1
FALSE	High	Master Protein	TraesCS5A02G443800	Histone H1	0	6.398	12	4	7	1	289	29.3	10.76	14.68	4	High	1
FALSE	High	Master Protein	TraesCS5A02G469300	40S ribosomal protein S26	0	6.371	26	2	2	1	139	15.3	11.03	8.15	2	High	1
FALSE	High	Master Protein	TraesCS1D01G193600.1	ATP synthase subunit alpha ATMG01190.1	0	6.316	7	3	3	3	528	57.5	6.25	7.86	3	High	1
FALSE	High	Master Protein	TraesCS6B01G144000.1	ATP-dependent RNA helicase AT1G54270.1	0	6.263	4	2	2	2	551	61.9	8.75	5.48	2	High	1
FALSE	High	Master Protein	TraesCS7D01G211700.2	ADP,ATP carrier protein, mitochondrial AT4G28390.1	0	6.179	8	3	4	1	380	41.8	9.91	8.02	3	High	1
FALSE	High	Master Protein	TraesCS1D01G156400.2	40S ribosomal protein S17, putative, expressed AT5G04800.1	0	6.159	16	2	2	1	143	16.5	10.21	5.12	2	High	1
FALSE	High	Master Protein	TraesCS2B02G133500	Photosystem I reaction center subunit N	0	5.949	16	3	3	3	202	22	9.74	7.43	3	High	1
FALSE	High	Master Protein	TraesCS7A01G356300.1	40S ribosomal protein S24 AT3G04920.1	0	5.943	17	2	2	2	137	15.7	10.71	6.29	2	High	1
FALSE	High	Master Protein	TraesCS2A01G408500.1	Polyubiquitin protein AT4G02890.3	0	5.816	21	2	10	1	229	25.6	6.81	24.37	2	High	1
FALSE	High	Master Protein	TraesCS3A01G263900.1	Guanine nucleotide-binding protein beta subunit-like protein AT1G18080.1	0	5.769	11	3	4	3	332	36.2	6.43	8.42	3	High	1
FALSE	High	Master Protein	TraesCS5B02G448200	Histone H1	0	5.761	13	4	7	1	270	27.5	10.67	15.22	4	High	1
FALSE	High	Master Protein	TraesCS5B01G353200.1	Chlorophyll a-b binding protein, chloroplastic AT2G34420.1	0	5.705	8	2	2	1	265	28	5.43	6.21	2	High	1
FALSE	High	Master Protein	TraesCS4B02G196800	Elongation factor 1-alpha	0	5.689	7	4	4	4	544	60.6	9.01	6.59	4	High	1
FALSE	High	Master Protein	TraesCS4A02G305300	Ribosomal protein	0	5.506	5	2	2	2	282	31.5	10.18	6.49	2	High	1
FALSE	High	Master Protein	TRIAE_CS42_5BS_TGACv1_424220_AA1387710.1	TRIAE_CS42_5BS_TGACv1_424220_AA1387710.1	0	5.4	10	2	2	2	314	34	10.89	7.25	2	High	1
FALSE	High	Master Protein	TraesCS5B01G162600.1	Ribulose bisphosphate carboxylase small chain AT1G67090.1	0	5.354	29	3	3	1	175	19.5	8.54	7.77	3	High	1
FALSE	High	Master Protein	TraesCS1A01G543300LC.1	ATP synthase subunit alpha	0	5.332	8	3	3	2	504	55.2	7.52	6.26	3	High	1
FALSE	High	Master Protein	TRIAE_CS42_2DL_TGACv1_164978_AA0565010.1	TRIAE_CS42_2DL_TGACv1_164978_AA0565010.1	0	5.28	14	3	3	3	251	27.2	11.41	8.1	3	High	1
FALSE	High	Master Protein	TraesCS2B02G079500	Ribulose bisphosphate carboxylase small chain AT1G67090.1	0	5.234	22	3	3	1	195	22	9.42	6.78	3	High	1
FALSE	High	Master Protein	TraesCS2D01G284400.1	ATP synthase subunit beta ATCG00480.1	0	5.227	5	2	2	1	498	53.9	5.16	5.36	2	High	1
FALSE	High	Master Protein	TraesCS1B01G174800.1	40S ribosomal protein S17, putative, expressed AT5G04800.1	0	5.176	16	2	2	1	143	16.5	10.21	5.29	2	High	1
FALSE	High	Master Protein	TraesCS4A01G141400.1	ATP dependent RNA helicase AT2G42520.1	0	5.084	3	2	3	1	656	70.9	9.03	8.66	2	High	1
FALSE	High	Master Protein	TraesCS7D02G341300	Eukaryotic translation initiation factor 1A	0	4.977	22	3	4	3	153	17.3	9.55	7.08	3	High	1
FALSE	High	Master Protein	TRIAE_CS42_7DL_TGACv1_602919_AA1971920.3	TRIAE_CS42_7DL_TGACv1_602919_AA1971920.3	0	4.884	16	2	4	2	151	16.6	10.64	7.39	2	High	1
FALSE	High	Master Protein	TraesCS2B01G374600LC.1	30S ribosomal protein S19	0	4.814	8	1	2	1	154	17.4	10.27	6.09	1	High	1
FALSE	High	Master Protein	TraesCS5D01G553300LC.1	30S ribosomal protein S2	0	4.807	10	2	2	2	248	28.5	10.1	2.97	2	High	1
FALSE	High	Master Protein	TraesCS5A01G267000.1	AT hook motif DNA-binding family protein AT4G12080.1	0	4.792	7	2	2	2	397	39.8	9.36	4.8	2	High	1
FALSE	High	Master Protein	TraesCS1D01G419800.2	Ketol-acid reductoisomerase (NADP(+)) AT3G58610.1	0	4.792	4	2	2	2	625	67.3	6.86	2.64	2	High	1
FALSE	High	Master Protein	TraesCS4D01G018500.1	RNA-binding protein AT2G21660.1	0	4.786	19	2	3	1	166	16.1	5.6	5.88	2	High	1
FALSE	High	Master Protein	TraesCS1D02G386500	Nucleolar family protein	0	4.752	5	3	3	3	582	64.8	8.72	4.32	3	High	1
FALSE	High	Master Protein	TraesCS3D02G332800	TRIAE_CS42_3B_TGACv1_223174_AA0777350.1	0	4.726	15	2	2	2	162	18.4	10.64	4.88	2	High	1
FALSE	High	Master Protein	TRIAE_CS42_5DL_TGACv1_434405_AA1435300.1	TRIAE_CS42_5DL_TGACv1_434405_AA1435300.1	0	4.722	7	1	2	1	188	21.2	9.82	5.74	1	High	1
FALSE	High	Master Protein	TraesCS3B01G100800.1	30S ribosomal protein S7 AT2G37270.1	0	4.684	11	2	3	2	200	22.3	9.8	5.17	2	High	1
FALSE	High	Master Protein	TraesCS2A02G165100	Chaperone protein DnaJ	0	4.643	5	2	2	2	391	41	6.28	4.99	2	High	1
FALSE	High	Master Protein	TraesCS3D02G253300	TRIAE_CS42_3AL_TGACv1_198285_AA0668310.2	0	4.608	22	2	3	1	143	16.2	10.32	4.92	2	High	1
FALSE	High	Master Protein	TraesCS2A01G563100.1	30S ribosomal protein S17 AT1G79850.1	0	4.512	19	3	3	1	145	15.7	10.27	6.62	3	High	1
FALSE	High	Master Protein	TraesCS2D02G572300	TRIAE_CS42_2DL_TGACv1_157886_AA0500270.1	0	4.455	19	3	3	1	147	16	10.24	5.89	3	High	1
FALSE	High	Master Protein	TraesCS2D02G572300	TRIAE_CS42_U_TGACv1_641087_AA2084670.3	0	4.369	13	2	2	2	160	18.4	9.26	5.59	2	High	1
FALSE	High	Master Protein	TraesCS1B02G120600	TRIAE_CS42_1DS_TGACv1_081257_AA0259300.1	0	4.358	11	3	3	3	265	29.9	10.15	4.11	3	High	1
FALSE	High	Master Protein	TraesCS2D01G164100.1	30S ribosomal protein S4 AT5G39850.1	0	4.272	13	2	2	2	195	22.7	10.2	2.58	2	High	1
FALSE	High	Master Protein	TRIAE_CS42_7BL_TGACv1_578173_AA1890570.1	TRIAE_CS42_7BL_TGACv1_578173_AA1890570.1	0	4.155	4	1	5	1	269	28.8	9.72	15.96	1	High	1
FALSE	High	Master Protein	TraesCS5D02G238300	TRIAE_CS42_5BL_TGACv1_404484_AA1301600.2	0	4.134	8	2	2	2	320	34.9	8.56	5.12	2	High	1
FALSE	High	Master Protein	TraesCS6A01G105400.1	50S ribosomal protein L3 AT2G43030.1	0	4.098	9	2	2	2	264	28	10.61	3.03	2	High	1
FALSE	High	Master Protein	TRIAE_CS42_5BL_TGACv1_405766_AA1335000.1	HMG-Y-related protein A	0	3.971	14	3	3	1	161	17.1	10.27	6.74	3	High	1
FALSE	High	Master Protein	TraesCS5B01G449000.1	Histone H1 AT1G06760.1	0	3.95	10	3	6	2	290	29.4	10.9	15.11	3	High	1
FALSE	High	Master Protein	TraesCS5D02G020900	TRIAE_CS42_5DS_TGACv1_457259_AA1484440.1	0	3.945	19	2	3	1	174	16.9	5.54	7.16	2	High	1
FALSE	High	Master Protein	TraesCS6D01G193000.1	Elongation factor Tu AT4G20360.1	0	3.94	7	2	2	2	470	50.5	6.28	5.64	2	High	1
FALSE	High	Master Protein	TraesCS7A02G276300	TRIAE_CS42_U_TGACv1_642167_AA2112620.1	0	3.808	8	2	2	1	260	27.4	5.25	4.8	2	High	1
FALSE	High	Master Protein	TraesCS7D02G091500	Single-stranded DNA-binding protein WHY1, chloroplastic	0	3.737	10	2	2	2	311	34.2	8.91	4.7	2	High	1
FALSE	High	Master Protein	TraesCS5B02G334600	Alba DNA/RNA-binding protein	0	3.706	4	1	1	1	326	35.4	9.67	2.88	1	High	1
FALSE	High	Master Protein	TRIAE_CS42_7BS_TGACv1_593752_AA1954160.4	TRIAE_CS42_7BS_TGACv1_593752_AA1954160.4	0	3.699	3	2	2	2	743	85.6	5	4.72	2	High	1
FALSE	High	Master Protein	TraesCS2A02G253600	TRIAE_CS42_2AL_TGACv1_093370_AA0278710.1	0	3.604	5	2	2	2	477	52	10.01	4.69	2	High	1
FALSE	High	Master Protein	TraesCS3A01G230000.2	Carbonic anhydrase AT5G14740.1	0	3.501	6	1	2	1	259	28.1	8.07	4.43	1	High	1
FALSE	High	Master Protein	TraesCS1A01G540700LC.1	Photosystem II D2 protein	0	3.472	4	1	1	1	353	39.7	5.73	3.08	1	High	1
FALSE	High	Master Protein	TraesCS2B02G415800	TRIAE_CS42_2BL_TGACv1_129685_AA0392600.1	0	3.457	8	2	3	2	246	25.7	10.76	8.25	2	High	1
FALSE	High	Master Protein	TraesCS7B02G486500	TRIAE_CS42_7AL_TGACv1_557798_AA1786240.1	0	3.444	6	2	3	2	425	46.2	9.23	6.48	2	High	1
FALSE	High	Master Protein	TraesCS4D01G189600LC.1	ATP synthase subunit alpha, chloroplastic	0	3.428	10	2	2	1	257	27.7	9.25	4.44	2	High	1
FALSE	High	Master Protein	TraesCS5D01G452000.1	Histone H1 AT1G06760.1	0	3.415	7	2	5	1	284	29	10.8	12.53	2	High	1
FALSE	High	Master Protein	TraesCS7D01G313200.1	40S ribosomal protein S13 AT3G60770.1	0	3.403	15	2	2	2	151	17.1	10.54	4.7	2	High	1
FALSE	High	Master Protein	TraesCS5D01G045500LC.1	Photosystem II CP43 reaction center protein	0	3.245	5	1	1	1	293	32.6	7.34	3.64	1	High	1
FALSE	High	Master Protein	TraesCS5B02G322900.1	TRIAE_CS42_5BL_TGACv1_405399_AA1326490.1	0	3.208	6	2	2	1	263	28.3	5.29	2.45	2	High	1
FALSE	High	Master Protein	TraesCS6D01G049100.1	Heat shock 70 kDa protein AT5G28540.1	0	3.196	3	1	2	1	665	73.1	5.21	3.23	1	High	1
FALSE	High	Master Protein	TraesCS1B01G057300.1	30S ribosomal protein S8 ATCG00770.1	0	3.163	8	1	1	1	152	18	10.73	3.15	1	High	1
FALSE	High	Master Protein	TraesCS7B02G489000	TRIAE_CS42_7BL_TGACv1_577264_AA1870560.2	0	3.154	6	1	1	1	250	28.6	11.85	3.62	1	High	1
FALSE	High	Master Protein	TraesCS7B01G178500.1	Glucose-6-phosphate/phosphate translocator AT1G61800.1	0	3.153	2	1	1	1	482	53.6	9.33	2.45	1	High	1
FALSE	High	Master Protein	TraesCS1D01G446900.2	Translation initiation factor if-2, putative AT1G76810.1	0	3.119	1	1	1	1	1404	155.2	5.99	2.75	1	High	1
FALSE	High	Master Protein	TraesCS4B01G020300.1	RNA-binding protein AT5G61030.1	0	3.106	17	2	3	1	163	15.9	5.6	6.04	2	High	1
FALSE	High	Master Protein	TraesCS7D02G349900	TRIAE_CS42_7BL_TGACv1_579718_AA1909600.1	0	3.085	3	1	1	1	368	41.1	9.47	1.95	1	High	1
FALSE	High	Master Protein	TraesCS2A01G276100.1	40S ribosomal protein S8 AT5G20290.1	0	3.084	5	1	1	1	225	25.3	10.45	2.6	1	High	1
FALSE	High	Master Protein	TraesCS5A01G203000.1	Annexin AT1G68090.1	0	3.081	5	2	2	2	384	43.1	9.31	4.51	2	High	1
FALSE	High	Master Protein	TraesCS5D02G252200	TRIAE_CS42_5AL_TGACv1_375331_AA1219990.1	0	3.053	3	1	1	1	528	55.9	9.66	2.66	1	High	1
FALSE	High	Master Protein	TraesCS4A01G023500.1	Histone-lysine N-methyltransferase AT1G73100.1	0	3.016	3	2	2	2	834	91.6	8.48	4.12	2	High	1
FALSE	High	Master Protein	TRIAE_CS42_1AL_TGACv1_003087_AA0047640.1	TRIAE_CS42_1AL_TGACv1_003087_AA0047640.1	0	3.011	6	1	1	1	419	43	5.81	3.23	1	High	1
FALSE	High	Master Protein	TraesCS4D02G064900	Alba DNA/RNA-binding protein	0	2.999	3	1	1	1	389	43.2	8.84	3.69	1	High	1
FALSE	High	Master Protein	TraesCS2A01G354200.2	50S ribosomal protein L23 AT3G55280.1	0	2.963	7	1	1	1	176	19.5	10.13	2.66	1	High	1
FALSE	High	Master Protein	TraesCS7D01G157200.1	26S protease regulatory subunit AT1G53750.1	0	2.936	3	1	1	1	426	47.6	6.29	2.87	1	High	1
FALSE	High	Master Protein	TraesCS2B02G340300	TRIAE_CS42_2BL_TGACv1_129468_AA0384990.2	0	2.902	5	1	1	1	328	35.2	9.13	1.97	1	High	1
FALSE	High	Master Protein	TraesCS1D01G452900.1	RNA-binding protein 40 AT5G11600.1	0	2.892	8	2	3	1	211	22.7	10.35	1.78	2	High	1
FALSE	High	Master Protein	TraesCS5D01G464900.1	Chlorophyll a-b binding protein, chloroplastic AT2G34420.1	0	2.81	8	2	2	1	266	28.4	5.43	4.25	2	High	1
FALSE	High	Master Protein	TraesCS4D02G086400	TRIAE_CS42_4AL_TGACv1_291250_AA0993200.3	0	2.792	5	1	1	1	288	31	6	3.02	1	High	1
FALSE	High	Master Protein	TraesCS2B02G490700	Peroxisomal (S)-2-hydroxy-acid oxidase	0	2.781	10	1	1	1	116	13.1	11	1.96	1	High	1
FALSE	High	Master Protein	TraesCSU01G296000LC.1	Photosystem II protein D1	0	2.755	3	1	1	1	351	39.3	8.46	3.01	1	High	1
FALSE	High	Master Protein	TraesCS7A01G286200.1	RNA binding protein AT1G48920.1	0	2.73	2	1	1	1	608	63.5	5.57	2.96	1	High	1
FALSE	High	Master Protein	TRIAE_CS42_2BL_TGACv1_132374_AA0437210.3	TRIAE_CS42_2BL_TGACv1_132374_AA0437210.3	0	2.706	2	1	1	1	438	47.8	9.04	2.36	1	High	1
FALSE	High	Master Protein	TraesCS2B01G389800.1	Nucleic acid binding protein, putative AT5G53800.1	0	2.702	4	1	1	1	348	41.1	9.77	2.47	1	High	1
FALSE	High	Master Protein	TraesCS3A01G250200.1	Glycine dehydrogenase decarboxylating protein AT2G26080.1	0	2.643	1	1	1	1	1031	111	6.84	1.91	1	High	1
FALSE	High	Master Protein	TraesCS1D01G179900.1	Photosystem II protein D1 ATCG00020.1	0	2.633	5	2	2	2	353	38.9	5.36	2.22	2	High	1
FALSE	High	Master Protein	TraesCS2D01G566300.1	30S ribosomal protein S3, chloroplastic ATCG00800.1	0	2.63	8	2	2	2	239	27.5	9.8	0	2	High	1
FALSE	High	Master Protein	TraesCS1A01G444800.1	Translation initiation factor IF-2 AT5G11600.1	0	2.623	8	2	3	1	209	22.6	10.29	3.81	2	High	1
FALSE	High	Master Protein	TraesCS2A01G499100LC.1	50S ribosomal protein L33	0	2.615	13	1	1	1	76	8.8	9.94	2.67	1	High	1
FALSE	High	Master Protein	TraesCS5A01G229400.1	Peptidyl-prolyl cis-trans isomerase AT1G26550.1	0	2.551	8	1	1	1	148	15.5	9.35	2.11	1	High	1
FALSE	High	Master Protein	TraesCS7D02G132800.1	TRIAE_CS42_7DS_TGACv1_624633_AA2062320.1	0	2.536	1	1	3	1	1046	112.5	5.33	4.37	1	High	1
FALSE	High	Master Protein	TraesCS6D01G152700.1	Chlorophyll a-b binding protein, chloroplastic AT1G61520.1	0	2.504	4	1	1	1	269	29.3	8.75	2.35	1	High	1
FALSE	High	Master Protein	TraesCS5B01G063300.1	Homocysteine s-methyltransferase AT3G63250.1	0	2.466	5	1	1	1	340	36.6	5.26	2.41	1	High	1
FALSE	High	Master Protein	TraesCS2D01G229600.1	ATP synthase gamma chain AT1G15700.1	0	2.449	4	1	1	1	359	39.8	7.96	2.02	1	High	1
FALSE	High	Master Protein	TraesCS2D01G597900.1	AT hook motif DNA-binding family protein, putative AT2G45850.1	0	2.407	2	1	1	1	405	41.3	9.8	2.79	1	High	1
FALSE	High	Master Protein	TraesCS2D01G735900LC.1	Coatomer subunit beta'-2	0	2.383	2	1	1	1	485	53.7	9.38	2.43	1	High	1
FALSE	High	Master Protein	TraesCS2B02G260600	TRIAE_CS42_U_TGACv1_646050_AA2145940.1	0	2.367	2	1	1	1	650	71.4	10.51	2.29	1	High	1
FALSE	High	Master Protein	TraesCS7D01G340100.2	60S ribosomal protein L37a AT3G60245.1	0	2.334	7	1	1	1	122	13.7	9.76	1.7	1	High	1
FALSE	High	Master Protein	TraesCS4A02G000100	Pollen allergen Phl p 5	0	2.329	3	1	1	1	384	37.7	5.26	2.02	1	High	1
FALSE	High	Master Protein	TraesCS5A01G108000.1	Fructose-bisphosphate aldolase AT4G38970.1	0	2.328	5	2	2	2	385	41.6	6.4	1.83	2	High	1
FALSE	High	Master Protein	TraesCS6D01G177000.1	40S ribosomal protein S24 AT3G04920.1	0	2.314	10	1	1	1	144	16.5	10.7	2.65	1	High	1
FALSE	High	Master Protein	TraesCS4A01G190500.1	30S ribosomal protein S9 AT2G09990.1	0	2.301	7	1	1	1	149	16.8	10.56	2.03	1	High	1
FALSE	High	Master Protein	TraesCS5A02G279700	TRIAE_CS42_4AS_TGACv1_307800_AA1023490.1	0	2.289	5	1	1	1	226	25.1	10.02	2.77	1	High	1
FALSE	High	Master Protein	TRIAE_CS42_5DL_TGACv1_435654_AA1453120.2	TRIAE_CS42_5DL_TGACv1_435654_AA1453120.2	0	2.257	4	1	2	1	230	25.8	10.36	1.72	1	High	1
FALSE	High	Master Protein	TRIAE_CS42_6AS_TGACv1_488147_AA1574460.1	TRIAE_CS42_6AS_TGACv1_488147_AA1574460.1	0	2.242	6	1	1	1	340	37.3	11.46	3.06	1	High	1
FALSE	High	Master Protein	TraesCS2B02G443000	TRIAE_CS42_2DL_TGACv1_158194_AA0511970.2	0	2.242	12	2	2	2	172	19.2	10.58	2.11	2	High	1
FALSE	High	Master Protein	TraesCS3D02G507900	RNA-binding protein AT5G61030.1	0	2.235	4	1	1	1	429	47.2	12.38	2.31	1	High	1
FALSE	High	Master Protein	TraesCS1D01G132700.1	ATP synthase gamma chain AT2G33040.1	0	2.219	5	1	1	1	326	35.4	9.44	2.1	1	High	1
FALSE	High	Master Protein	TraesCS3B01G471100.1	Dek protein AT3G48710.1	0	2.211	3	1	1	1	492	54.5	8.47	1.97	1	High	1
FALSE	High	Master Protein	TraesCS4A01G114100.1	40S ribosomal protein S7 AT1G48830.1	0	2.18	5	1	1	1	192	22.2	9.79	2.74	1	High	1
FALSE	High	Master Protein	TraesCS3D01G635400LC.1	ATPase subunit 4	0	2.159	8	1	1	1	213	24.4	9.35	2.5	1	High	1
FALSE	High	Master Protein	TraesCS7D01G066800.1	30S ribosomal protein S10 AT3G45030.1	0	2.069	8	1	1	1	155	17.2	9.61	2.57	1	High	1
FALSE	High	Master Protein	TraesCS7B02G198400	TRIAE_CS42_7BL_TGACv1_577288_AA1871360.1	0	2.045	5	1	1	1	284	30.9	9.58	2.56	1	High	1
FALSE	High	Master Protein	TraesCS6A01G242300.1	50S ribosomal protein L19 AT4G17560.1	0	2.034	6	1	1	1	222	24.4	9.91	2.75	1	High	1
FALSE	High	Master Protein	TraesCS2D02G297000	TRIAE_CS42_2DL_TGACv1_160375_AA0549830.1	0	2.022	5	1	2	1	234	25.9	11.63	5.63	1	High	1
FALSE	High	Master Protein	TraesCS4B01G289300.1	arginine/glutamate-rich 1 protein AT5G13340.1	0	1.992	4	1	1	1	267	32.6	10.83	2.32	1	High	1
FALSE	High	Master Protein	TraesCS1A01G262500.1	Cold shock protein AT4G38680.1	0	1.961	12	1	1	1	206	19.2	5.91	3.04	1	High	1
FALSE	High	Master Protein	TraesCS6B01G186500.1	Stigma/style cell cycle inhibitor 1 AT1G79200.1	0	1.955	7	1	1	1	167	19.7	9.99	2.41	1	High	1
FALSE	High	Master Protein	TraesCS4B01G045500.2	14-3-3 protein AT3G02520.1	0	1.937	5	1	1	1	261	29.2	4.88	2.3	1	High	1
FALSE	High	Master Protein	TRIAE_CS42_6AS_TGACv1_485695_AA1550260.5	TRIAE_CS42_6AS_TGACv1_485695_AA1550260.5	0	1.849	1	1	1	1	1011	115.6	7.24	1.84	1	High	1
FALSE	High	Master Protein	TRIAE_CS42_3B_TGACv1_221099_AA0730340.4	TRIAE_CS42_3B_TGACv1_221099_AA0730340.4	0	1.84	1	1	1	1	992	107.2	9.58	1.86	1	High	1
FALSE	High	Master Protein	TraesCS7D01G480000.2	60S ribosomal protein L30 AT1G77940.1	0	1.834	10	1	1	1	118	13.1	9.31	2.23	1	High	1
FALSE	High	Master Protein	TRIAE_CS42_5AL_TGACv1_377012_AA1243200.1	TRIAE_CS42_5AL_TGACv1_377012_AA1243200.1	0	1.816	2	1	2	1	621	68.3	6.57	1.65	1	High	1
FALSE	High	Master Protein	TraesCS4A01G264600.1	UDP-glucose 6-dehydrogenase AT5G15490.1	0	1.776	2	1	1	1	480	52.8	6.29	1.63	1	High	1
FALSE	High	Master Protein	TRIAE_CS42_7AL_TGACv1_557577_AA1783430.1	TRIAE_CS42_7AL_TGACv1_557577_AA1783430.1	0	1.718	2	1	1	1	434	49.5	11.37	2.98	1	High	1
FALSE	High	Master Protein	TRIAE_CS42_5BS_TGACv1_423576_AA1379840.1	TRIAE_CS42_5BS_TGACv1_423576_AA1379840.1	0	1.711	8	1	1	1	140	13.9	8.66	3.42	1	High	1
FALSE	High	Master Protein	TRIAE_CS42_4BS_TGACv1_328194_AA1084370.1	TRIAE_CS42_4BS_TGACv1_328194_AA1084370.1	0	1.688	6	1	1	1	199	21	10.54	2.56	1	High	1
FALSE	High	Master Protein	TraesCS3B01G084900LC.1	Ras family protein	0	1.636	3	1	1	1	331	36.8	9.2	2.36	1	High	1
FALSE	High	Master Protein	TRIAE_CS42_2DS_TGACv1_177321_AA0573330.2	TRIAE_CS42_2DS_TGACv1_177321_AA0573330.2	0	1.612	4	1	1	1	275	32.3	11.31	2.15	1	High	1
FALSE	High	Master Protein	TraesCS1B01G151700.1	TATA-box-binding AT3G13445.1	0	1.604	4	1	1	1	234	25.1	9.63	2.38	1	High	1
FALSE	High	Master Protein	TraesCS5B01G080500LC.1	30S ribosomal protein S14, chloroplastic	0	1.6	8	1	1	1	107	12.3	10.18	2.12	1	High	1
FALSE	High	Master Protein	TRIAE_CS42_2BL_TGACv1_129605_AA0390160.5	TRIAE_CS42_2BL_TGACv1_129605_AA0390160.5	0	1.599	2	1	1	1	511	57	7.85	2.09	1	High	1
FALSE	High	Master Protein	TRIAE_CS42_3AL_TGACv1_195978_AA0656130.1	TRIAE_CS42_3AL_TGACv1_195978_AA0656130.1	0	1.562	4	1	1	1	210	24.1	11	2.03	1	High	1
FALSE	High	Master Protein	TraesCS3B01G181300.1	5'-methylthioadenosine/S-adenosylhomocysteine nucleosidase AT4G28940.1	0	1.548	4	1	1	1	361	39.3	5.72	0	1	High	1
FALSE	High	Master Protein	TraesCS7D01G609300LC.1	Ribosomal protein L37	0	1.545	3	1	1	1	461	51.4	9.55	1.67	1	High	1
FALSE	High	Master Protein	TraesCS2D01G594500.1	ABC(ATP-binding) family transporter AT4G19210.1	0	1.545	2	1	1	1	604	68.1	7.66	2.34	1	High	1
FALSE	High	Master Protein	TRIAE_CS42_3AS_TGACv1_212176_AA0698410.1	TRIAE_CS42_3AS_TGACv1_212176_AA0698410.1	0	1.543	7	1	1	1	155	16.2	5.01	1.66	1	High	1
FALSE	High	Master Protein	TraesCS5B01G374900.1	Chaperone protein dnaJ, putative AT3G44110.1	0	1.543	3	1	1	1	421	46.3	6.55	0	1	High	1
FALSE	High	Master Protein	TRIAE_CS42_7AS_TGACv1_570762_AA1840600.1	TRIAE_CS42_7AS_TGACv1_570762_AA1840600.1	0	1.531	3	1	1	1	374	41	5.02	1.65	1	High	1
FALSE	High	Master Protein	TraesCS1A01G342500.1	Phosphotransferase AT1G47840.1	0	1.527	2	1	1	1	507	54.8	6.55	2.85	1	High	1
FALSE	High	Master Protein	TraesCS5D01G557100.1	Nuclear factor Y, putative	0	1.506	2	1	1	1	502	52.4	9.99	0	1	High	1
FALSE	High	Master Protein	TraesCS4A01G021600.1	Alba DNA/RNA-binding protein AT3G07030.1	0	1.491	3	1	1	1	320	34.4	9.82	2.34	1	High	1
FALSE	High	Master Protein	TRIAE_CS42_4DL_TGACv1_344277_AA1145790.1	TRIAE_CS42_4DL_TGACv1_344277_AA1145790.1	0	1.443	1	1	1	1	1294	144.1	7.08	0	1	High	1
FALSE	High	Master Protein	TraesCS3B01G854800LC.1	40S ribosomal protein S10	0	1.436	7	1	1	1	182	20.1	9.73	1.85	1	High	1
FALSE	High	Master Protein	TraesCS2A01G184000.1	40S ribosomal protein S13 AT4G00100.1	0	1.41	8	1	1	1	151	16.9	10.36	1.84	1	High	1
FALSE	High	Master Protein	TraesCS2A01G537100.1	Superoxide dismutase AT3G10920.1	0	1.401	6	1	1	1	231	25.3	8.25	1.69	1	High	1
FALSE	High	Master Protein	TRIAE_CS42_3B_TGACv1_220952_AA0724690.4	TRIAE_CS42_3B_TGACv1_220952_AA0724690.4	0	1.377	1	1	1	1	1023	112.3	5.62	0	1	High	1
FALSE	High	Master Protein	TRIAE_CS42_1DS_TGACv1_080190_AA0242660.1	TRIAE_CS42_1DS_TGACv1_080190_AA0242660.1	0	1.37	6	1	1	1	141	15.4	10.51	2.27	1	High	1
FALSE	High	Master Protein	TRIAE_CS42_2BL_TGACv1_132771_AA0439720.2	TRIAE_CS42_2BL_TGACv1_132771_AA0439720.2	0	1.35	3	1	1	1	275	30	9.48	0	1	High	1
FALSE	High	Master Protein	TRIAE_CS42_7DS_TGACv1_624207_AA2059750.1	TRIAE_CS42_7DS_TGACv1_624207_AA2059750.1	0	1.341	3	1	1	1	473	50.9	7.12	2	1	High	1
FALSE	High	Master Protein	TRIAE_CS42_5AL_TGACv1_376802_AA1241040.4	TRIAE_CS42_5AL_TGACv1_376802_AA1241040.4	0	1.334	2	1	1	1	564	62.9	4.89	0	1	High	1
FALSE	High	Master Protein	TRIAE_CS42_2BS_TGACv1_147491_AA0483780.1	TRIAE_CS42_2BS_TGACv1_147491_AA0483780.1	0	1.322	3	1	1	1	286	31.1	5.35	2.21	1	High	1
FALSE	High	Master Protein	TraesCS4A01G007400.1	3-ketoacyl-CoA synthase AT2G26250.1	0	1.322	3	1	1	1	540	60.1	9.2	1.85	1	High	1
FALSE	High	Master Protein	TRIAE_CS42_5AL_TGACv1_374669_AA1206160.1	TRIAE_CS42_5AL_TGACv1_374669_AA1206160.1	0	1.314	3	1	1	1	355	39.4	9.79	1.87	1	High	1
FALSE	High	Master Protein	TraesCS5A01G114400.1	ATP dependent RNA helicase AT1G31970.1	0	1.302	2	1	1	1	535	58.4	8.85	1.73	1	High	1
FALSE	High	Master Protein	TRIAE_CS42_5DL_TGACv1_435583_AA1452340.2	TRIAE_CS42_5DL_TGACv1_435583_AA1452340.2	0	1.284	4	1	1	1	209	23	10.64	0	1	High	1
FALSE	High	Master Protein	TraesCS7A01G271500.3	RING/U-box superfamily protein AT3G19910.1	0	1.283	4	1	1	1	244	26.9	3.94	0	1	High	1
FALSE	High	Master Protein	TRIAE_CS42_6AL_TGACv1_472493_AA1522770.1	TRIAE_CS42_6AL_TGACv1_472493_AA1522770.1	0	1.26	3	1	1	1	292	32.8	11.62	0	1	High	1
FALSE	High	Master Protein	TraesCS4A01G130800.2	Ricin B-like lectin R40C1 AT2G39050.1	0.001	1.247	3	1	1	1	359	40.1	6.95	2.46	1	High	1
FALSE	High	Master Protein	TraesCS5A01G089200.1	ADP-ribosylation factor family protein AT4G02080.1	0.001	1.246	7	1	1	1	193	22	7.47	1.68	1	High	1
FALSE	High	Master Protein	TraesCS7A01G256300.1	60S ribosomal protein L32 AT4G18100.1	0.001	1.232	7	1	1	1	163	19	10.48	0	1	High	1
FALSE	High	Master Protein	TraesCS7B01G181800.1	ABC transporter ATP-binding protein ARB1 AT5G60790.1	0.001	1.228	2	1	1	1	592	66	6.54	1.64	1	High	1
FALSE	High	Master Protein	TraesCS2B01G240000.1	Oxygen-evolving enhancer protein 3-2, chloroplastic AT4G05180.1	0.001	1.218	7	1	1	1	214	22.9	9.61	2.35	1	High	1
FALSE	High	Master Protein	TraesCS4D01G168700.1	splicing factor-like protein AT3G49430.1	0.001	1.197	4	1	1	1	293	32.1	10.43	0	1	High	1
FALSE	High	Master Protein	TraesCS5A01G079000.1	Serine/arginine rich splicing factor, putative AT3G55460.1	0.001	1.192	3	1	1	1	296	33.2	11.33	2.54	1	High	1
FALSE	High	Master Protein	TRIAE_CS42_7BL_TGACv1_577301_AA1871640.1	TRIAE_CS42_7BL_TGACv1_577301_AA1871640.1	0.002	1.18	4	1	1	1	218	24.5	10.02	1.82	1	High	1
FALSE	High	Master Protein	TraesCS5D01G306200.1	Ferredoxin AT3G07480.1	0.002	1.173	8	1	1	1	160	17.2	8.21	1.78	1	High	1
FALSE	High	Master Protein	TraesCS5A01G170200.1	40S ribosomal protein S19 AT5G15520.1	0.002	1.172	5	1	1	1	165	18.2	9.54	0	1	High	1
FALSE	High	Master Protein	TraesCS5A01G411600.1	F-box protein	0.002	1.161	2	1	1	1	433	46	5.36	0	1	High	1
FALSE	High	Master Protein	TraesCS4B01G232500.1	F-box family protein	0.002	1.155	3	1	1	1	385	43.3	6.47	0	1	High	1
FALSE	High	Master Protein	TraesCS7A01G423200.1	Serrate RNA effector molecule AT2G27100.1	0.002	1.15	2	1	1	1	700	77.8	8.79	0	1	High	1
FALSE	High	Master Protein	TRIAE_CS42_3B_TGACv1_224291_AA0794920.1	TRIAE_CS42_3B_TGACv1_224291_AA0794920.1	0.002	1.142	1	1	1	1	599	63.1	9.77	2.22	1	High	1
FALSE	High	Master Protein	TraesCS7A01G453100.1	transmembrane protein, putative (Protein of unknown function, DUF642) AT5G11420.1	0.002	1.13	2	1	1	1	370	39.6	8.27	0	1	High	1
FALSE	High	Master Protein	TraesCS3A01G308000.1	Arginine/serine-rich splicing factor, putative AT2G37340.1	0.002	1.126	2	1	1	1	333	37.5	11.41	0	1	High	1
FALSE	High	Master Protein	TRIAE_CS42_2BL_TGACv1_130815_AA0418290.3	TRIAE_CS42_2BL_TGACv1_130815_AA0418290.3	0.009	1.107	8	1	1	1	169	18.2	9.95	1.96	1	High	1
FALSE	High	Master Protein	TRIAE_CS42_6DL_TGACv1_527386_AA1703220.1	TRIAE_CS42_6DL_TGACv1_527386_AA1703220.1	0.009	1.106	4	1	1	1	269	30.2	11.53	1.89	1	High	1
FALSE	High	Master Protein	TRIAE_CS42_1DL_TGACv1_061494_AA0196820.1	TRIAE_CS42_1DL_TGACv1_061494_AA0196820.1	0.009	1.1	2	1	1	1	471	51.2	8.72	1.83	1	High	1
FALSE	High	Master Protein	TraesCS5A01G692700LC.1	DNA damage-inducible protein 1	0.009	1.086	4	1	1	1	197	22.6	7.06	0	1	High	1
FALSE	High	Master Protein	TraesCS1A01G124600.1	Mitochondrial carrier family AT5G19760.1	0.009	1.084	4	1	1	1	302	32.3	9.47	1.92	1	High	1
FALSE	High	Master Protein	TRIAE_CS42_1BL_TGACv1_031645_AA0117810.3	TRIAE_CS42_1BL_TGACv1_031645_AA0117810.3	0.009	1.081	4	1	1	1	430	45.9	9.39	1.99	1	High	1
FALSE	High	Master Protein	TraesCS6A01G026600.1	Protein KINESIN LIGHT CHAIN-RELATED 3 AT4G10840.1	0.009	1.079	2	1	1	1	684	73.9	6.37	0	1	High	1
FALSE	High	Master Protein	TRIAE_CS42_4BL_TGACv1_321635_AA1063400.1	TRIAE_CS42_4BL_TGACv1_321635_AA1063400.1	0.008	1.077	3	1	1	1	276	29.9	10.08	1.69	1	High	1
FALSE	High	Master Protein	TRIAE_CS42_5BL_TGACv1_404742_AA1309770.1	TRIAE_CS42_5BL_TGACv1_404742_AA1309770.1	0.009	1.037	2	1	1	1	442	47	11.65	2.35	1	High	1
FALSE	High	Master Protein	TraesCS7B01G080400LC.1	60S ribosomal protein L39	0.009	1.025	20	1	1	1	51	6.5	12.19	2.69	1	High	1
FALSE	High	Master Protein	TraesCS2B01G540100.2	Cysteine protease AT1G47128.1	0.009	1.024	3	1	1	1	463	50.5	5.12	2.1	1	High	1
