# Supplementary material for: The TaBBM-TaWRKY41-TacAGPS1a module affects starch synthesis and grain quality by regulating embryo and endosperm development in wheat
Source: Research Square preprint supplement (doi:10.21203/rs.3.rs-8619315/v1), 2026-01-27
Supplement: Supplementary file 3 [file 27d46a6e9257d9094eb5ffee.xlsx]

## Sheet: Sheet1
Supplementary Data 4. List of differentially expressed GO between amiR-BBMs and Fielder.
id	num	pvalue	per	ratio	class	ID	Descrption	Pvalue	Qvalue	fg_num	bg_num
GO:0009266 response to temperature stimulus	76	9.36226259497007e-40	5.58	0.202	Biological Process	GO:0009266	response to temperature stimulus	9.36226259497007e-40	1.26577790283995e-36	76	376
GO:0003700 DNA-binding transcription factor activity	220	1.76064381236339e-39	12.209	0.073	Molecular Function	GO:0003700	DNA-binding transcription factor activity	1.76064381236339e-39	9.84199891111133e-37	220	2999
GO:0140110 transcription regulator activity	228	2.59905136231577e-38	12.653	0.071	Molecular Function	GO:0140110	transcription regulator activity	2.59905136231577e-38	7.26434855767258e-36	228	3232
GO:0009408 response to heat	48	2.87425481026075e-32	3.524	0.277	Biological Process	GO:0009408	response to heat	2.87425481026075e-32	1.94299625173627e-29	48	173
GO:0050789 regulation of biological process	431	2.09641840077572e-25	31.645	0.048	Biological Process	GO:0050789	regulation of biological process	2.09641840077572e-25	9.44785892616259e-23	431	8921
GO:0003677 DNA binding	314	8.15009793141235e-25	17.425	0.05	Molecular Function	GO:0003677	DNA binding	8.15009793141235e-25	1.51863491455317e-22	314	6306
GO:0065007 biological regulation	451	1.51169032959466e-24	33.113	0.047	Biological Process	GO:0065007	biological regulation	1.51169032959466e-24	5.10951331402996e-22	451	9567
GO:0050794 regulation of cellular process	394	1.52926505741616e-23	28.928	0.049	Biological Process	GO:0050794	regulation of cellular process	1.52926505741616e-23	4.13513271525329e-21	394	8084
GO:0006355 regulation of transcription, DNA-templated	263	4.60154695411647e-23	19.31	0.056	Biological Process	GO:0006355	regulation of transcription, DNA-templated	4.60154695411647e-23	7.77661435245684e-21	263	4687
GO:1903506 regulation of nucleic acid-templated transcription	263	4.60154695411647e-23	19.31	0.056	Biological Process	GO:1903506	regulation of nucleic acid-templated transcription	4.60154695411647e-23	7.77661435245684e-21	263	4687
GO:2001141 regulation of RNA biosynthetic process	263	4.60154695411647e-23	19.31	0.056	Biological Process	GO:2001141	regulation of RNA biosynthetic process	4.60154695411647e-23	7.77661435245684e-21	263	4687
GO:0051252 regulation of RNA metabolic process	266	1.00086077367218e-22	19.53	0.056	Biological Process	GO:0051252	regulation of RNA metabolic process	1.00086077367218e-22	1.50351529556088e-20	266	4788
GO:0019219 regulation of nucleobase-containing compound metabolic process	268	1.22301092446092e-22	19.677	0.055	Biological Process	GO:0019219	regulation of nucleobase-containing compound metabolic process	1.22301092446092e-22	1.65351076987117e-20	268	4845
GO:0043565 sequence-specific DNA binding	101	2.48083105206584e-22	5.605	0.083	Molecular Function	GO:0043565	sequence-specific DNA binding	2.48083105206584e-22	3.46696139526201e-20	101	1213
GO:0009628 response to abiotic stimulus	108	2.65707564956144e-21	7.93	0.084	Biological Process	GO:0009628	response to abiotic stimulus	2.65707564956144e-21	3.26578752564278e-19	108	1286
GO:1901700 response to oxygen-containing compound	92	5.09684958478312e-21	6.755	0.092	Biological Process	GO:1901700	response to oxygen-containing compound	5.09684958478312e-21	5.74245053218898e-19	92	996
GO:0031326 regulation of cellular biosynthetic process	269	9.77126920868488e-21	19.75	0.054	Biological Process	GO:0031326	regulation of cellular biosynthetic process	9.77126920868488e-21	1.01621199770323e-18	269	5025
GO:0009889 regulation of biosynthetic process	269	1.15111971587459e-20	19.75	0.053	Biological Process	GO:0009889	regulation of biosynthetic process	1.15111971587459e-20	1.11165275418746e-18	269	5031
GO:0010556 regulation of macromolecule biosynthetic process	265	4.27360002719285e-20	19.457	0.053	Biological Process	GO:0010556	regulation of macromolecule biosynthetic process	4.27360002719285e-20	3.61119202297795e-18	265	4977
GO:2000112 regulation of cellular macromolecule biosynthetic process	265	4.27360002719285e-20	19.457	0.053	Biological Process	GO:2000112	regulation of cellular macromolecule biosynthetic process	4.27360002719285e-20	3.61119202297795e-18	265	4977
GO:0004674 protein serine/threonine kinase activity	116	6.11748967604151e-19	6.437	0.069	Molecular Function	GO:0004674	protein serine/threonine kinase activity	6.11748967604151e-19	6.83935345781441e-17	116	1683
GO:0006351 transcription, DNA-templated	270	9.54894214695387e-19	19.824	0.052	Biological Process	GO:0006351	transcription, DNA-templated	9.54894214695387e-19	7.45229770731998e-17	270	5225
GO:0097659 nucleic acid-templated transcription	270	1.00439555576164e-18	19.824	0.052	Biological Process	GO:0097659	nucleic acid-templated transcription	1.00439555576164e-18	7.45229770731998e-17	270	5227
GO:0042221 response to chemical	163	1.04729035827722e-18	11.968	0.063	Biological Process	GO:0042221	response to chemical	1.04729035827722e-18	7.45229770731998e-17	163	2590
GO:0032774 RNA biosynthetic process	270	1.19833094502611e-18	19.824	0.052	Biological Process	GO:0032774	RNA biosynthetic process	1.19833094502611e-18	8.10071718837651e-17	270	5234
GO:0071310 cellular response to organic substance	85	1.28225249036192e-18	6.241	0.089	Biological Process	GO:0071310	cellular response to organic substance	1.28225249036192e-18	8.25526365223486e-17	85	951
GO:0051171 regulation of nitrogen compound metabolic process	278	1.4600729141584e-18	20.411	0.051	Biological Process	GO:0051171	regulation of nitrogen compound metabolic process	1.4600729141584e-18	8.97281172700977e-17	278	5451
GO:0010033 response to organic substance	122	1.83047071292233e-18	8.957	0.072	Biological Process	GO:0010033	response to organic substance	1.83047071292233e-18	1.07599843646565e-16	122	1696
GO:0010468 regulation of gene expression	275	2.1458795694169e-18	20.191	0.051	Biological Process	GO:0010468	regulation of gene expression	2.1458795694169e-18	1.20884549077152e-16	275	5388
GO:0080090 regulation of primary metabolic process	278	3.69227069614444e-18	20.411	0.051	Biological Process	GO:0080090	regulation of primary metabolic process	3.69227069614444e-18	1.99677999247491e-16	278	5489
GO:0031323 regulation of cellular metabolic process	282	4.32210187904123e-18	20.705	0.05	Biological Process	GO:0031323	regulation of cellular metabolic process	4.32210187904123e-18	2.24749297710144e-16	282	5601
GO:0019438 aromatic compound biosynthetic process	307	7.70227089494504e-18	22.54	0.049	Biological Process	GO:0019438	aromatic compound biosynthetic process	7.70227089494504e-18	3.74166377975861e-16	307	6293
GO:0009755 hormone-mediated signaling pathway	79	7.74900782790245e-18	5.8	0.091	Biological Process	GO:0009755	hormone-mediated signaling pathway	7.74900782790245e-18	3.74166377975861e-16	79	868
GO:0032870 cellular response to hormone stimulus	79	1.70158503071147e-17	5.8	0.09	Biological Process	GO:0032870	cellular response to hormone stimulus	1.70158503071147e-17	7.93290676386863e-16	79	880
GO:0004672 protein kinase activity	258	2.04869901899798e-17	14.317	0.047	Molecular Function	GO:0004672	protein kinase activity	2.04869901899798e-17	1.90870458603311e-15	258	5458
GO:0071495 cellular response to endogenous stimulus	79	2.20369641987891e-17	5.8	0.089	Biological Process	GO:0071495	cellular response to endogenous stimulus	2.20369641987891e-17	9.93132519892095e-16	79	884
GO:0009651 response to salt stress	39	2.6083416428783e-17	2.863	0.16	Biological Process	GO:0009651	response to salt stress	2.6083416428783e-17	1.13757351650692e-15	39	244
GO:0006970 response to osmotic stress	40	2.58485549980912e-16	2.937	0.146	Biological Process	GO:0006970	response to osmotic stress	2.58485549980912e-16	1.09210144866935e-14	40	274
GO:0060255 regulation of macromolecule metabolic process	286	2.88789247656553e-16	20.999	0.049	Biological Process	GO:0060255	regulation of macromolecule metabolic process	2.88789247656553e-16	1.18316079645957e-14	286	5891
GO:0019222 regulation of metabolic process	291	4.98082550450336e-16	21.366	0.048	Biological Process	GO:0019222	regulation of metabolic process	4.98082550450336e-16	1.98061061237898e-14	291	6051
GO:1901362 organic cyclic compound biosynthetic process	308	5.70751104793962e-16	22.614	0.047	Biological Process	GO:1901362	organic cyclic compound biosynthetic process	5.70751104793962e-16	2.20472998194696e-14	308	6520
GO:0009725 response to hormone	107	8.30614304792554e-16	7.856	0.071	Biological Process	GO:0009725	response to hormone	8.30614304792554e-16	3.11941816688759e-14	107	1513
GO:0009719 response to endogenous stimulus	107	9.91354127089032e-16	7.856	0.071	Biological Process	GO:0009719	response to endogenous stimulus	9.91354127089032e-16	3.62246156709289e-14	107	1517
GO:0051082 unfolded protein binding	33	2.95956234350838e-15	1.831	0.151	Molecular Function	GO:0051082	unfolded protein binding	2.95956234350838e-15	2.36342192860169e-13	33	218
GO:0005509 calcium ion binding	81	3.9029884117964e-15	4.495	0.074	Molecular Function	GO:0005509	calcium ion binding	3.9029884117964e-15	2.72721315274273e-13	81	1100
GO:0016773 phosphotransferase activity, alcohol group as acceptor	263	4.81523239555399e-15	14.595	0.045	Molecular Function	GO:0016773	phosphotransferase activity, alcohol group as acceptor	4.81523239555399e-15	2.99079434346076e-13	263	5860
GO:0042537 benzene-containing compound metabolic process	22	5.63914014137828e-15	1.615	0.262	Biological Process	GO:0042537	benzene-containing compound metabolic process	5.63914014137828e-15	2.00634670293248e-13	22	84
GO:0042542 response to hydrogen peroxide	18	7.18786079013126e-15	1.322	0.346	Biological Process	GO:0042542	response to hydrogen peroxide	7.18786079013126e-15	2.49179174057884e-13	18	52
GO:0016301 kinase activity	269	9.18483535936523e-15	14.928	0.044	Molecular Function	GO:0016301	kinase activity	9.18483535936523e-15	5.13432296588516e-13	269	6067
GO:0070887 cellular response to chemical stimulus	88	2.92552367919444e-14	6.461	0.074	Biological Process	GO:0070887	cellular response to chemical stimulus	2.92552367919444e-14	9.88827003567722e-13	88	1191
GO:0005634 nucleus	316	3.41383651924494e-14	31.072	0.045	Cellular Component	GO:0005634	nucleus	3.41383651924494e-14	5.59869189156171e-12	316	7065
GO:0016841 ammonia-lyase activity	18	3.69459673465753e-14	0.999	0.295	Molecular Function	GO:0016841	ammonia-lyase activity	3.69459673465753e-14	1.87752688606687e-12	18	61
GO:0006559 L-phenylalanine catabolic process	18	4.52609807609858e-14	1.322	0.316	Biological Process	GO:0006559	L-phenylalanine catabolic process	4.52609807609858e-14	1.45697252354412e-12	18	57
GO:1902222 erythrose 4-phosphate/phosphoenolpyruvate family amino acid catabolic process	18	4.52609807609858e-14	1.322	0.316	Biological Process	GO:1902222	erythrose 4-phosphate/phosphoenolpyruvate family amino acid catabolic process	4.52609807609858e-14	1.45697252354412e-12	18	57
GO:0006558 L-phenylalanine metabolic process	21	4.94054349845817e-14	1.542	0.253	Biological Process	GO:0006558	L-phenylalanine metabolic process	4.94054349845817e-14	1.51809427498078e-12	21	83
GO:1902221 erythrose 4-phosphate/phosphoenolpyruvate family amino acid metabolic process	21	4.94054349845817e-14	1.542	0.253	Biological Process	GO:1902221	erythrose 4-phosphate/phosphoenolpyruvate family amino acid metabolic process	4.94054349845817e-14	1.51809427498078e-12	21	83
GO:0006468 protein phosphorylation	258	7.38079942272328e-14	18.943	0.048	Biological Process	GO:0006468	protein phosphorylation	7.38079942272328e-14	2.21752018211597e-12	258	5396
GO:0009074 aromatic amino acid family catabolic process	21	1.0612577533251e-13	1.542	0.244	Biological Process	GO:0009074	aromatic amino acid family catabolic process	1.0612577533251e-13	3.11917496194681e-12	21	86
GO:0140096 catalytic activity, acting on a protein	393	1.08290486157487e-13	21.809	0.039	Molecular Function	GO:0140096	catalytic activity, acting on a protein	1.08290486157487e-13	5.04453181350295e-12	393	9964
GO:0018130 heterocycle biosynthetic process	288	2.02834349915579e-13	21.145	0.046	Biological Process	GO:0018130	heterocycle biosynthetic process	2.02834349915579e-13	5.83472427842262e-12	288	6266
GO:0120254 olefinic compound metabolic process	18	3.17657491357827e-13	1.322	0.286	Biological Process	GO:0120254	olefinic compound metabolic process	3.17657491357827e-13	8.94735267324545e-12	18	63
GO:0080134 regulation of response to stress	33	3.58705560694992e-13	2.423	0.14	Biological Process	GO:0080134	regulation of response to stress	3.58705560694992e-13	9.89734526652305e-12	33	236
GO:0034654 nucleobase-containing compound biosynthetic process	271	3.66143964945555e-13	19.897	0.046	Biological Process	GO:0034654	nucleobase-containing compound biosynthetic process	3.66143964945555e-13	9.90053281212779e-12	271	5829
GO:0007165 signal transduction	130	5.73628606423977e-13	9.545	0.059	Biological Process	GO:0007165	signal transduction	5.73628606423977e-13	1.52067818801023e-11	130	2207
GO:0023052 signaling	130	8.37955233979498e-13	9.545	0.059	Biological Process	GO:0023052	signaling	8.37955233979498e-13	2.1786836083467e-11	130	2219
GO:0045548 phenylalanine ammonia-lyase activity	13	2.9827429044544e-12	0.721	0.382	Molecular Function	GO:0045548	phenylalanine ammonia-lyase activity	2.9827429044544e-12	1.28257944891539e-10	13	34
GO:0044260 cellular macromolecule metabolic process	671	4.69625296325172e-12	49.266	0.037	Biological Process	GO:0044260	cellular macromolecule metabolic process	4.69625296325172e-12	1.19798754836157e-10	671	18007
GO:0016310 phosphorylation	262	5.58570777893813e-12	19.236	0.046	Biological Process	GO:0016310	phosphorylation	5.58570777893813e-12	1.3984957253934e-10	262	5725
GO:0005524 ATP binding	346	7.20496351701858e-12	19.201	0.039	Molecular Function	GO:0005524	ATP binding	7.20496351701858e-12	2.87683900429527e-10	346	8794
GO:0009800 cinnamic acid biosynthetic process	13	1.43648320905953e-11	0.954	0.371	Biological Process	GO:0009800	cinnamic acid biosynthetic process	1.43648320905953e-11	3.46808089044371e-10	13	35
GO:0009803 cinnamic acid metabolic process	13	1.43648320905953e-11	0.954	0.371	Biological Process	GO:0009803	cinnamic acid metabolic process	1.43648320905953e-11	3.46808089044371e-10	13	35
GO:0006457 protein folding	42	1.58505701635785e-11	3.084	0.101	Biological Process	GO:0006457	protein folding	1.58505701635785e-11	3.75964401072949e-10	42	416
GO:0050896 response to stimulus	388	1.96703654501508e-11	28.488	0.041	Biological Process	GO:0050896	response to stimulus	1.96703654501508e-11	4.58523001527653e-10	388	9403
GO:0009409 response to cold	28	2.0877883804955e-11	2.056	0.14	Biological Process	GO:0009409	response to cold	2.0877883804955e-11	4.74695072255057e-10	28	200
GO:0009723 response to ethylene	32	2.10663493604315e-11	2.349	0.124	Biological Process	GO:0009723	response to ethylene	2.10663493604315e-11	4.74695072255057e-10	32	258
GO:0033993 response to lipid	48	3.34786896589246e-11	3.524	0.09	Biological Process	GO:0033993	response to lipid	3.34786896589246e-11	7.42019482276493e-10	48	533
GO:0010035 response to inorganic substance	50	4.86434949067258e-11	3.671	0.087	Biological Process	GO:0010035	response to inorganic substance	4.86434949067258e-11	1.06074201796602e-09	50	576
GO:0016772 transferase activity, transferring phosphorus-containing groups	271	5.73724742669871e-11	15.039	0.041	Molecular Function	GO:0016772	transferase activity, transferring phosphorus-containing groups	5.73724742669871e-11	2.13808087434972e-09	271	6633
GO:0048583 regulation of response to stimulus	46	7.62440549676164e-11	3.377	0.09	Biological Process	GO:0048583	regulation of response to stimulus	7.62440549676164e-11	1.63622162406694e-09	46	509
GO:1901363 heterocyclic compound binding	840	1.46007561365102e-10	46.615	0.033	Molecular Function	GO:1901363	heterocyclic compound binding	1.46007561365102e-10	4.84370137230138e-09	840	25573
GO:0097159 organic cyclic compound binding	840	1.47303977332958e-10	46.615	0.033	Molecular Function	GO:0097159	organic cyclic compound binding	1.47303977332958e-10	4.84370137230138e-09	840	25574
GO:1901606 alpha-amino acid catabolic process	23	2.00253508761664e-10	1.689	0.153	Biological Process	GO:1901606	alpha-amino acid catabolic process	2.00253508761664e-10	4.23035537259014e-09	23	150
GO:0120255 olefinic compound biosynthetic process	15	2.42579828971951e-10	1.101	0.25	Biological Process	GO:0120255	olefinic compound biosynthetic process	2.42579828971951e-10	5.04566044261658e-09	15	60
GO:0010200 response to chitin	8	3.20036127405159e-10	0.587	0.667	Biological Process	GO:0010200	response to chitin	3.20036127405159e-10	6.55589157957234e-09	8	12
GO:0051259 protein complex oligomerization	14	4.3372917428378e-10	1.028	0.264	Biological Process	GO:0051259	protein complex oligomerization	4.3372917428378e-10	8.75226632286076e-09	14	53
GO:0009063 cellular amino acid catabolic process	23	5.07448801989144e-10	1.689	0.146	Biological Process	GO:0009063	cellular amino acid catabolic process	5.07448801989144e-10	1.00892761807253e-08	23	157
GO:0009873 ethylene-activated signaling pathway	27	5.17894153832069e-10	1.982	0.126	Biological Process	GO:0009873	ethylene-activated signaling pathway	5.17894153832069e-10	1.01477231301588e-08	27	214
GO:0000302 response to reactive oxygen species	18	6.49861419844883e-10	1.322	0.188	Biological Process	GO:0000302	response to reactive oxygen species	6.49861419844883e-10	1.25516091375755e-08	18	96
GO:0071369 cellular response to ethylene stimulus	27	7.08519617756993e-10	1.982	0.124	Biological Process	GO:0071369	cellular response to ethylene stimulus	7.08519617756993e-10	1.34918101860205e-08	27	217
GO:0043621 protein self-association	15	8.92111091063306e-10	0.832	0.211	Molecular Function	GO:0043621	protein self-association	8.92111091063306e-10	2.77050055502438e-08	15	71
GO:0007154 cell communication	140	2.26704425705925e-09	10.279	0.051	Biological Process	GO:0007154	cell communication	2.26704425705925e-09	4.25700532714458e-08	140	2760
GO:0051716 cellular response to stimulus	163	2.35648697918661e-09	11.968	0.048	Biological Process	GO:0051716	cellular response to stimulus	2.35648697918661e-09	4.3643430080278e-08	163	3361
GO:1901000 regulation of response to salt stress	12	3.85351928705838e-09	0.881	0.279	Biological Process	GO:1901000	regulation of response to salt stress	3.85351928705838e-09	7.04048388662559e-08	12	43
GO:0035639 purine ribonucleoside triphosphate binding	351	4.45053382589124e-09	19.478	0.037	Molecular Function	GO:0035639	purine ribonucleoside triphosphate binding	4.45053382589124e-09	1.30939389930169e-07	351	9452
GO:0047484 regulation of response to osmotic stress	12	5.15174880547516e-09	0.881	0.273	Biological Process	GO:0047484	regulation of response to osmotic stress	5.15174880547516e-09	9.28688584666989e-08	12	44
GO:0034605 cellular response to heat	11	8.22832481103964e-09	0.808	0.297	Biological Process	GO:0034605	cellular response to heat	8.22832481103964e-09	1.46377567691126e-07	11	37
GO:0098542 defense response to other organism	45	8.48656553397098e-09	3.304	0.079	Biological Process	GO:0098542	defense response to other organism	8.48656553397098e-09	1.49010864960114e-07	45	570
GO:0009737 response to abscisic acid	32	9.23931991479465e-09	2.349	0.098	Biological Process	GO:0009737	response to abscisic acid	9.23931991479465e-09	1.58121019301296e-07	32	328
GO:0097305 response to alcohol	32	9.23931991479465e-09	2.349	0.098	Biological Process	GO:0097305	response to alcohol	9.23931991479465e-09	1.58121019301296e-07	32	328
GO:0002376 immune system process	45	1.16261731871903e-08	3.304	0.078	Biological Process	GO:0002376	immune system process	1.16261731871903e-08	1.94056619124461e-07	45	576
GO:0006955 immune response	45	1.16261731871903e-08	3.304	0.078	Biological Process	GO:0006955	immune response	1.16261731871903e-08	1.94056619124461e-07	45	576
GO:0140662 ATP-dependent protein folding chaperone	25	1.75109784430444e-08	1.387	0.105	Molecular Function	GO:0140662	ATP-dependent protein folding chaperone	1.75109784430444e-08	4.89431847483092e-07	25	239
GO:0031347 regulation of defense response	20	1.92307484357444e-08	1.468	0.138	Biological Process	GO:0031347	regulation of defense response	1.92307484357444e-08	3.17072827867395e-07	20	145
GO:0044183 protein folding chaperone	26	2.1403242319424e-08	1.443	0.1	Molecular Function	GO:0044183	protein folding chaperone	2.1403242319424e-08	5.69733926502763e-07	26	259
GO:0009072 aromatic amino acid family metabolic process	25	2.29413759757502e-08	1.836	0.113	Biological Process	GO:0009072	aromatic amino acid family metabolic process	2.29413759757502e-08	3.73695666496558e-07	25	222
GO:0043207 response to external biotic stimulus	53	3.96638633645625e-08	3.891	0.069	Biological Process	GO:0043207	response to external biotic stimulus	3.96638633645625e-08	6.30888744339864e-07	53	768
GO:0051707 response to other organism	53	3.96638633645625e-08	3.891	0.069	Biological Process	GO:0051707	response to other organism	3.96638633645625e-08	6.30888744339864e-07	53	768
GO:0009607 response to biotic stimulus	57	4.0267265189923e-08	4.185	0.067	Biological Process	GO:0009607	response to biotic stimulus	4.0267265189923e-08	6.33038866706696e-07	57	855
GO:0051087 chaperone binding	13	5.0380704890156e-08	0.721	0.188	Molecular Function	GO:0051087	chaperone binding	5.0380704890156e-08	1.28012791061806e-06	13	69
GO:0006464 cellular protein modification process	332	5.35175200727706e-08	24.376	0.04	Biological Process	GO:0006464	cellular protein modification process	5.35175200727706e-08	8.31674564809033e-07	332	8340
GO:0009753 response to jasmonic acid	16	6.97521717760198e-08	1.175	0.158	Biological Process	GO:0009753	response to jasmonic acid	6.97521717760198e-08	1.07164700274067e-06	16	101
GO:0036211 protein modification process	332	7.08543751837864e-08	24.376	0.04	Biological Process	GO:0036211	protein modification process	7.08543751837864e-08	1.07634960953347e-06	332	8363
GO:0046395 carboxylic acid catabolic process	24	7.32316046874874e-08	1.762	0.11	Biological Process	GO:0046395	carboxylic acid catabolic process	7.32316046874874e-08	1.10010143930537e-06	24	219
GO:0070542 response to fatty acid	16	8.04055903817076e-08	1.175	0.157	Biological Process	GO:0070542	response to fatty acid	8.04055903817076e-08	1.19459734281394e-06	16	102
GO:0006772 thiamine metabolic process	9	8.93220611619841e-08	0.661	0.321	Biological Process	GO:0006772	thiamine metabolic process	8.93220611619841e-08	1.28471730522343e-06	9	28
GO:0042723 thiamine-containing compound metabolic process	9	8.93220611619841e-08	0.661	0.321	Biological Process	GO:0042723	thiamine-containing compound metabolic process	8.93220611619841e-08	1.28471730522343e-06	9	28
GO:0042724 thiamine-containing compound biosynthetic process	9	8.93220611619841e-08	0.661	0.321	Biological Process	GO:0042724	thiamine-containing compound biosynthetic process	8.93220611619841e-08	1.28471730522343e-06	9	28
GO:0044419 biological process involved in interspecies interaction between organisms	53	1.06236998512681e-07	3.891	0.067	Biological Process	GO:0044419	biological process involved in interspecies interaction between organisms	1.06236998512681e-07	1.51192023146468e-06	53	792
GO:0009765 photosynthesis, light harvesting	16	1.21854888249766e-07	1.175	0.152	Biological Process	GO:0009765	photosynthesis, light harvesting	1.21854888249766e-07	1.71612300951754e-06	16	105
GO:0044550 secondary metabolite biosynthetic process	18	1.4663307176685e-07	1.322	0.134	Biological Process	GO:0044550	secondary metabolite biosynthetic process	1.4663307176685e-07	2.04379291782249e-06	18	134
GO:0009938 negative regulation of gibberellic acid mediated signaling pathway	6	1.48542961693757e-07	0.441	0.6	Biological Process	GO:0009938	negative regulation of gibberellic acid mediated signaling pathway	1.48542961693757e-07	2.04928657357101e-06	6	10
GO:0009415 response to water	30	1.55033837568736e-07	2.203	0.09	Biological Process	GO:0009415	response to water	1.55033837568736e-07	2.11722978174677e-06	30	333
GO:0009414 response to water deprivation	28	1.67642500198696e-07	2.056	0.094	Biological Process	GO:0009414	response to water deprivation	1.67642500198696e-07	2.26652660268637e-06	28	298
GO:0016740 transferase activity	458	1.68295071058807e-07	25.416	0.034	Molecular Function	GO:0016740	transferase activity	1.68295071058807e-07	3.95656075009053e-06	458	13304
GO:0005516 calmodulin binding	20	1.69870228984209e-07	1.11	0.111	Molecular Function	GO:0005516	calmodulin binding	1.69870228984209e-07	3.95656075009053e-06	20	180
GO:0071396 cellular response to lipid	29	1.79519006794373e-07	2.129	0.091	Biological Process	GO:0071396	cellular response to lipid	1.79519006794373e-07	2.4030663087722e-06	29	317
GO:0001101 response to acid chemical	30	2.00759958784877e-07	2.203	0.089	Biological Process	GO:0001101	response to acid chemical	2.00759958784877e-07	2.66105357134464e-06	30	337
GO:0000160 phosphorelay signal transduction system	37	2.84179735133925e-07	2.717	0.077	Biological Process	GO:0000160	phosphorelay signal transduction system	2.84179735133925e-07	3.7302039019521e-06	37	478
GO:0032559 adenyl ribonucleotide binding	382	2.94065422518675e-07	21.199	0.035	Molecular Function	GO:0032559	adenyl ribonucleotide binding	2.94065422518675e-07	6.57530284751757e-06	382	10853
GO:0002237 response to molecule of bacterial origin	6	3.18325068101008e-07	0.441	0.545	Biological Process	GO:0002237	response to molecule of bacterial origin	3.18325068101008e-07	3.9590222129129e-06	6	11
GO:0030554 adenyl nucleotide binding	382	3.20353842812935e-07	21.199	0.035	Molecular Function	GO:0030554	adenyl nucleotide binding	3.20353842812935e-07	6.8876076204781e-06	382	10862
GO:0015837 amine transport	9	3.25038066296843e-07	0.661	0.281	Biological Process	GO:0015837	amine transport	3.25038066296843e-07	3.9590222129129e-06	9	32
GO:0032890 regulation of organic acid transport	9	3.25038066296843e-07	0.661	0.281	Biological Process	GO:0032890	regulation of organic acid transport	3.25038066296843e-07	3.9590222129129e-06	9	32
GO:0032973 amino acid export across plasma membrane	9	3.25038066296843e-07	0.661	0.281	Biological Process	GO:0032973	amino acid export across plasma membrane	3.25038066296843e-07	3.9590222129129e-06	9	32
GO:0051952 regulation of amine transport	9	3.25038066296843e-07	0.661	0.281	Biological Process	GO:0051952	regulation of amine transport	3.25038066296843e-07	3.9590222129129e-06	9	32
GO:0051955 regulation of amino acid transport	9	3.25038066296843e-07	0.661	0.281	Biological Process	GO:0051955	regulation of amino acid transport	3.25038066296843e-07	3.9590222129129e-06	9	32
GO:0080143 regulation of amino acid export	9	3.25038066296843e-07	0.661	0.281	Biological Process	GO:0080143	regulation of amino acid export	3.25038066296843e-07	3.9590222129129e-06	9	32
GO:1903789 regulation of amino acid transmembrane transport	9	3.25038066296843e-07	0.661	0.281	Biological Process	GO:1903789	regulation of amino acid transmembrane transport	3.25038066296843e-07	3.9590222129129e-06	9	32
GO:0016054 organic acid catabolic process	24	3.47030273304685e-07	1.762	0.101	Biological Process	GO:0016054	organic acid catabolic process	3.47030273304685e-07	4.18915115632084e-06	24	238
GO:0043167 ion binding	684	4.02525402602214e-07	37.958	0.032	Molecular Function	GO:0043167	ion binding	4.02525402602214e-07	8.33376666869028e-06	684	21106
GO:0032101 regulation of response to external stimulus	17	4.76722292245598e-07	1.248	0.131	Biological Process	GO:0032101	regulation of response to external stimulus	4.76722292245598e-07	5.7019192319265e-06	17	130
GO:0009605 response to external stimulus	61	4.80783130502678e-07	4.479	0.06	Biological Process	GO:0009605	response to external stimulus	4.80783130502678e-07	5.7019192319265e-06	61	1014
GO:0016840 carbon-nitrogen lyase activity	18	5.23570805415335e-07	0.999	0.113	Molecular Function	GO:0016840	carbon-nitrogen lyase activity	5.23570805415335e-07	1.04527171509704e-05	18	159
GO:1901002 positive regulation of response to salt stress	9	5.75398988453895e-07	0.661	0.265	Biological Process	GO:1901002	positive regulation of response to salt stress	5.75398988453895e-07	6.76469071643188e-06	9	34
GO:0034308 primary alcohol metabolic process	9	7.5364313391313e-07	0.661	0.257	Biological Process	GO:0034308	primary alcohol metabolic process	7.5364313391313e-07	8.78384066422889e-06	9	35
GO:0009228 thiamine biosynthetic process	7	8.69941632172187e-07	0.514	0.368	Biological Process	GO:0009228	thiamine biosynthetic process	8.69941632172187e-07	9.96746683641354e-06	7	19
GO:0034309 primary alcohol biosynthetic process	7	8.69941632172187e-07	0.514	0.368	Biological Process	GO:0034309	primary alcohol biosynthetic process	8.69941632172187e-07	9.96746683641354e-06	7	19
GO:1901701 cellular response to oxygen-containing compound	32	9.17744905508023e-07	2.349	0.08	Biological Process	GO:1901701	cellular response to oxygen-containing compound	9.17744905508023e-07	1.04268160693012e-05	32	401
GO:0002831 regulation of response to biotic stimulus	16	1.37317615307567e-06	1.175	0.128	Biological Process	GO:0002831	regulation of response to biotic stimulus	1.37317615307567e-06	1.54652881128724e-05	16	125
GO:0044036 cell wall macromolecule metabolic process	29	1.3840975308118e-06	2.129	0.083	Biological Process	GO:0044036	cell wall macromolecule metabolic process	1.3840975308118e-06	1.54652881128724e-05	29	350
GO:0004714 transmembrane receptor protein tyrosine kinase activity	18	1.52555951412265e-06	0.999	0.105	Molecular Function	GO:0004714	transmembrane receptor protein tyrosine kinase activity	1.52555951412265e-06	2.94064747722263e-05	18	171
GO:0002682 regulation of immune system process	16	1.5288538183968e-06	1.175	0.127	Biological Process	GO:0002682	regulation of immune system process	1.5288538183968e-06	1.68049622965242e-05	16	126
GO:0050776 regulation of immune response	16	1.5288538183968e-06	1.175	0.127	Biological Process	GO:0050776	regulation of immune response	1.5288538183968e-06	1.68049622965242e-05	16	126
GO:0006796 phosphate-containing compound metabolic process	282	2.06610801197513e-06	20.705	0.039	Biological Process	GO:0006796	phosphate-containing compound metabolic process	2.06610801197513e-06	2.25272421950837e-05	282	7167
GO:0009699 phenylpropanoid biosynthetic process	14	2.10808248200753e-06	1.028	0.14	Biological Process	GO:0009699	phenylpropanoid biosynthetic process	2.10808248200753e-06	2.27762012878934e-05	14	100
GO:0006793 phosphorus metabolic process	283	2.1226341436942e-06	20.778	0.039	Biological Process	GO:0006793	phosphorus metabolic process	2.1226341436942e-06	2.27762012878934e-05	283	7199
GO:0016762 xyloglucan:xyloglucosyl transferase activity	16	2.13726356601918e-06	0.888	0.113	Molecular Function	GO:0016762	xyloglucan:xyloglucosyl transferase activity	2.13726356601918e-06	3.98243444468241e-05	16	141
GO:1900150 regulation of defense response to fungus	10	2.70466432617593e-06	0.734	0.196	Biological Process	GO:1900150	regulation of defense response to fungus	2.70466432617593e-06	2.87929619605501e-05	10	51
GO:0004842 ubiquitin-protein transferase activity	46	3.64927345346818e-06	2.553	0.058	Molecular Function	GO:0004842	ubiquitin-protein transferase activity	3.64927345346818e-06	6.58046406609261e-05	46	798
GO:0007623 circadian rhythm	12	4.09255002272105e-06	0.881	0.154	Biological Process	GO:0007623	circadian rhythm	4.09255002272105e-06	4.30744579067206e-05	12	78
GO:0072330 monocarboxylic acid biosynthetic process	31	4.10991499257911e-06	2.276	0.076	Biological Process	GO:0072330	monocarboxylic acid biosynthetic process	4.10991499257911e-06	4.30744579067206e-05	31	410
GO:0009751 response to salicylic acid	13	4.35600696290162e-06	0.954	0.141	Biological Process	GO:0009751	response to salicylic acid	4.35600696290162e-06	4.53024724141769e-05	13	92
GO:0035556 intracellular signal transduction	47	4.70535823216288e-06	3.451	0.062	Biological Process	GO:0035556	intracellular signal transduction	4.70535823216288e-06	4.85621704571314e-05	47	760
GO:0010337 regulation of salicylic acid metabolic process	6	4.83981827720893e-06	0.441	0.375	Biological Process	GO:0010337	regulation of salicylic acid metabolic process	4.83981827720893e-06	4.95714720514127e-05	6	16
GO:0009937 regulation of gibberellic acid mediated signaling pathway	7	5.22893146350008e-06	0.514	0.292	Biological Process	GO:0009937	regulation of gibberellic acid mediated signaling pathway	5.22893146350008e-06	5.31542506665572e-05	7	24
GO:0048511 rhythmic process	12	6.12904418913438e-06	0.881	0.148	Biological Process	GO:0048511	rhythmic process	6.12904418913438e-06	6.18393115202215e-05	12	81
GO:0031072 heat shock protein binding	11	7.97036707196884e-06	0.61	0.145	Molecular Function	GO:0031072	heat shock protein binding	7.97036707196884e-06	0.000139232349788456	11	76
GO:0097367 carbohydrate derivative binding	398	8.62296016578039e-06	22.087	0.034	Molecular Function	GO:0097367	carbohydrate derivative binding	8.62296016578039e-06	0.000146067719171856	398	11769
GO:0044282 small molecule catabolic process	28	9.01043016896477e-06	2.056	0.077	Biological Process	GO:0044282	small molecule catabolic process	9.01043016896477e-06	9.02377895440028e-05	28	365
GO:0005388 P-type calcium transporter activity	8	9.88214812020026e-06	0.444	0.205	Molecular Function	GO:0005388	P-type calcium transporter activity	9.88214812020026e-06	0.000162474141152704	8	39
GO:0019787 ubiquitin-like protein transferase activity	46	1.16001625201116e-05	2.553	0.055	Molecular Function	GO:0019787	ubiquitin-like protein transferase activity	1.16001625201116e-05	0.000185271167106926	46	835
GO:0006950 response to stress	234	1.31014041645186e-05	17.181	0.04	Biological Process	GO:0006950	response to stress	1.31014041645186e-05	0.000130243370811979	234	5913
GO:0034762 regulation of transmembrane transport	10	1.44917470084594e-05	0.734	0.164	Biological Process	GO:0034762	regulation of transmembrane transport	1.44917470084594e-05	0.000143013444930198	10	61
GO:0010411 xyloglucan metabolic process	16	1.48557105377071e-05	1.175	0.107	Biological Process	GO:0010411	xyloglucan metabolic process	1.48557105377071e-05	0.000145542903238985	16	150
GO:0032553 ribonucleotide binding	392	1.66299289559861e-05	21.754	0.034	Molecular Function	GO:0032553	ribonucleotide binding	1.66299289559861e-05	0.000258225841288784	392	11652
GO:0014070 response to organic cyclic compound	18	1.8472046548001e-05	1.322	0.096	Biological Process	GO:0014070	response to organic cyclic compound	1.8472046548001e-05	0.000179670553474081	18	187
GO:0032555 purine ribonucleotide binding	387	2.0365386494131e-05	21.476	0.034	Molecular Function	GO:0032555	purine ribonucleotide binding	2.0365386494131e-05	0.00030054650168779	387	11511
GO:0005488 binding	1302	2.04307103115134e-05	72.253	0.03	Molecular Function	GO:0005488	binding	2.04307103115134e-05	0.00030054650168779	1302	44052
GO:0048584 positive regulation of response to stimulus	16	2.06667282411678e-05	1.175	0.104	Biological Process	GO:0048584	positive regulation of response to stimulus	2.06667282411678e-05	0.000199581547014706	16	154
GO:0017076 purine nucleotide binding	387	2.26800663456479e-05	21.476	0.034	Molecular Function	GO:0017076	purine nucleotide binding	2.26800663456479e-05	0.000320107177273318	387	11525
GO:0051879 Hsp90 protein binding	7	2.29057014149064e-05	0.388	0.219	Molecular Function	GO:0051879	Hsp90 protein binding	2.29057014149064e-05	0.000320107177273318	7	32
GO:0010031 circumnutation	3	2.81222106478088e-05	0.22	1	Biological Process	GO:0010031	circumnutation	2.81222106478088e-05	0.000267755132365053	3	3
GO:0050879 multicellular organismal movement	3	2.81222106478088e-05	0.22	1	Biological Process	GO:0050879	multicellular organismal movement	2.81222106478088e-05	0.000267755132365053	3	3
GO:0043412 macromolecule modification	333	3.2795860174902e-05	24.449	0.037	Biological Process	GO:0043412	macromolecule modification	3.2795860174902e-05	0.000310069950744528	333	8974
GO:0004713 protein tyrosine kinase activity	19	3.83914256976242e-05	1.054	0.081	Molecular Function	GO:0004713	protein tyrosine kinase activity	3.83914256976242e-05	0.000523434316218828	19	236
GO:0016070 RNA metabolic process	281	3.95163186096702e-05	20.631	0.038	Biological Process	GO:0016070	RNA metabolic process	3.95163186096702e-05	0.000371014324724125	281	7417
GO:0043170 macromolecule metabolic process	737	4.097531321361e-05	54.112	0.034	Biological Process	GO:0043170	macromolecule metabolic process	4.097531321361e-05	0.000382059472171039	737	21851
GO:0009620 response to fungus	17	4.26644439525923e-05	1.248	0.094	Biological Process	GO:0009620	response to fungus	4.26644439525923e-05	0.000395084439889759	17	181
GO:0016701 oxidoreductase activity, acting on single donors with incorporation of molecular oxygen	16	4.41971180663363e-05	0.888	0.089	Molecular Function	GO:0016701	oxidoreductase activity, acting on single donors with incorporation of molecular oxygen	4.41971180663363e-05	0.000588242595216238	16	179
GO:0009867 jasmonic acid mediated signaling pathway	10	4.97851003516205e-05	0.734	0.143	Biological Process	GO:0009867	jasmonic acid mediated signaling pathway	4.97851003516205e-05	0.000457887453574088	10	70
GO:0015085 calcium ion transmembrane transporter activity	9	5.86704400595992e-05	0.499	0.143	Molecular Function	GO:0015085	calcium ion transmembrane transporter activity	5.86704400595992e-05	0.000762715720774789	9	63
GO:0019199 transmembrane receptor protein kinase activity	18	6.21684541878017e-05	0.999	0.08	Molecular Function	GO:0019199	transmembrane receptor protein kinase activity	6.21684541878017e-05	0.000789821952067754	18	224
GO:0009696 salicylic acid metabolic process	6	6.60083493273627e-05	0.441	0.25	Biological Process	GO:0009696	salicylic acid metabolic process	6.60083493273627e-05	0.000602995191152665	6	24
GO:0003676 nucleic acid binding	359	6.65600633557381e-05	19.922	0.033	Molecular Function	GO:0003676	nucleic acid binding	6.65600633557381e-05	0.000826823898130169	359	10731
GO:0071395 cellular response to jasmonic acid stimulus	10	7.18149300869731e-05	0.734	0.137	Biological Process	GO:0071395	cellular response to jasmonic acid stimulus	7.18149300869731e-05	0.000651636144144883	10	73
GO:0044262 cellular carbohydrate metabolic process	47	7.66058488502528e-05	3.451	0.055	Biological Process	GO:0044262	cellular carbohydrate metabolic process	7.66058488502528e-05	0.000690474050970279	47	850
GO:0071398 cellular response to fatty acid	10	8.07906882250689e-05	0.734	0.135	Biological Process	GO:0071398	cellular response to fatty acid	8.07906882250689e-05	0.000723370930333067	10	74
GO:0043168 anion binding	423	8.64485098307722e-05	23.474	0.033	Molecular Function	GO:0043168	anion binding	8.64485098307722e-05	0.00104470221943403	423	12923
GO:0008810 cellulase activity	8	8.78372170186034e-05	0.444	0.154	Molecular Function	GO:0008810	cellulase activity	8.78372170186034e-05	0.00104470221943403	8	52
GO:0070588 calcium ion transmembrane transport	8	9.21045983737269e-05	0.587	0.167	Biological Process	GO:0070588	calcium ion transmembrane transport	9.21045983737269e-05	0.000804302731090813	8	48
GO:0009403 toxin biosynthetic process	4	9.51837551586761e-05	0.294	0.444	Biological Process	GO:0009403	toxin biosynthetic process	9.51837551586761e-05	0.000804302731090813	4	9
GO:0009404 toxin metabolic process	4	9.51837551586761e-05	0.294	0.444	Biological Process	GO:0009404	toxin metabolic process	9.51837551586761e-05	0.000804302731090813	4	9
GO:0009700 indole phytoalexin biosynthetic process	4	9.51837551586761e-05	0.294	0.444	Biological Process	GO:0009700	indole phytoalexin biosynthetic process	9.51837551586761e-05	0.000804302731090813	4	9
GO:0010120 camalexin biosynthetic process	4	9.51837551586761e-05	0.294	0.444	Biological Process	GO:0010120	camalexin biosynthetic process	9.51837551586761e-05	0.000804302731090813	4	9
GO:0046217 indole phytoalexin metabolic process	4	9.51837551586761e-05	0.294	0.444	Biological Process	GO:0046217	indole phytoalexin metabolic process	9.51837551586761e-05	0.000804302731090813	4	9
GO:0052314 phytoalexin metabolic process	4	9.51837551586761e-05	0.294	0.444	Biological Process	GO:0052314	phytoalexin metabolic process	9.51837551586761e-05	0.000804302731090813	4	9
GO:0052315 phytoalexin biosynthetic process	4	9.51837551586761e-05	0.294	0.444	Biological Process	GO:0052315	phytoalexin biosynthetic process	9.51837551586761e-05	0.000804302731090813	4	9
GO:0052317 camalexin metabolic process	4	9.51837551586761e-05	0.294	0.444	Biological Process	GO:0052317	camalexin metabolic process	9.51837551586761e-05	0.000804302731090813	4	9
GO:0030544 Hsp70 protein binding	6	0.000100851278522221	0.333	0.214	Molecular Function	GO:0030544	Hsp70 protein binding	0.000100851278522221	0.00117449718112336	6	28
GO:0006066 alcohol metabolic process	18	0.000102189983802905	1.322	0.085	Biological Process	GO:0006066	alcohol metabolic process	0.000102189983802905	0.000858141975785883	18	213
GO:0003333 amino acid transmembrane transport	9	0.000103677043544104	0.661	0.145	Biological Process	GO:0003333	amino acid transmembrane transport	0.000103677043544104	0.000865255326368078	9	62
GO:0010410 hemicellulose metabolic process	20	0.00010891748324425	1.468	0.079	Biological Process	GO:0010410	hemicellulose metabolic process	0.00010891748324425	0.000903413726050467	20	253
GO:0009740 gibberellic acid mediated signaling pathway	7	0.000110100837511679	0.514	0.189	Biological Process	GO:0009740	gibberellic acid mediated signaling pathway	0.000110100837511679	0.000907660562901155	7	37
GO:1901605 alpha-amino acid metabolic process	35	0.000118565086672769	2.57	0.06	Biological Process	GO:1901605	alpha-amino acid metabolic process	0.000118565086672769	0.000971515134433837	35	580
GO:0010476 gibberellin mediated signaling pathway	7	0.00013143405252499	0.514	0.184	Biological Process	GO:0010476	gibberellin mediated signaling pathway	0.00013143405252499	0.00106406490427417	7	38
GO:0071370 cellular response to gibberellin stimulus	7	0.00013143405252499	0.514	0.184	Biological Process	GO:0071370	cellular response to gibberellin stimulus	0.00013143405252499	0.00106406490427417	7	38
GO:0042546 cell wall biogenesis	24	0.000132934920826783	1.762	0.071	Biological Process	GO:0042546	cell wall biogenesis	0.000132934920826783	0.00106980960093935	24	339
GO:0009916 alternative oxidase activity	5	0.000137370154256934	0.277	0.263	Molecular Function	GO:0009916	alternative oxidase activity	0.000137370154256934	0.00156714114754339	5	19
GO:0016702 oxidoreductase activity, acting on single donors with incorporation of molecular oxygen, incorporation of two atoms of oxygen	13	0.00014161640197415	0.721	0.094	Molecular Function	GO:0016702	oxidoreductase activity, acting on single donors with incorporation of molecular oxygen, incorporation of two atoms of oxygen	0.00014161640197415	0.001583271374071	13	139
GO:0080142 regulation of salicylic acid biosynthetic process	4	0.000154808276317117	0.294	0.4	Biological Process	GO:0080142	regulation of salicylic acid biosynthetic process	0.000154808276317117	0.00123846621053694	4	10
GO:0038023 signaling receptor activity	24	0.000157657269360385	1.332	0.064	Molecular Function	GO:0038023	signaling receptor activity	0.000157657269360385	0.0017280473249501	24	375
GO:0010383 cell wall polysaccharide metabolic process	20	0.000174257480056544	1.468	0.076	Biological Process	GO:0010383	cell wall polysaccharide metabolic process	0.000174257480056544	0.00137885875900449	20	262
GO:0010243 response to organonitrogen compound	10	0.00017439707676758	0.734	0.123	Biological Process	GO:0010243	response to organonitrogen compound	0.00017439707676758	0.00137885875900449	10	81
GO:1901615 organic hydroxy compound metabolic process	25	0.000177240901655008	1.836	0.068	Biological Process	GO:1901615	organic hydroxy compound metabolic process	0.000177240901655008	0.00139319592463704	25	367
GO:1990841 promoter-specific chromatin binding	3	0.000204475549144982	0.166	0.6	Molecular Function	GO:1990841	promoter-specific chromatin binding	0.000204475549144982	0.00219811215330856	3	5
GO:0009697 salicylic acid biosynthetic process	4	0.000237401093042073	0.294	0.364	Biological Process	GO:0009697	salicylic acid biosynthetic process	0.000237401093042073	0.00184463378041887	4	11
GO:1900426 positive regulation of defense response to bacterium	4	0.000237401093042073	0.294	0.364	Biological Process	GO:1900426	positive regulation of defense response to bacterium	0.000237401093042073	0.00184463378041887	4	11
GO:0001671 ATPase activator activity	4	0.000244566647323826	0.222	0.333	Molecular Function	GO:0001671	ATPase activator activity	0.000244566647323826	0.00257948595950979	4	12
GO:0030245 cellulose catabolic process	8	0.000246289840922056	0.587	0.145	Biological Process	GO:0030245	cellulose catabolic process	0.000246289840922056	0.00189195377799216	8	55
GO:0051275 beta-glucan catabolic process	8	0.000246289840922056	0.587	0.145	Biological Process	GO:0051275	beta-glucan catabolic process	0.000246289840922056	0.00189195377799216	8	55
GO:0071219 cellular response to molecule of bacterial origin	3	0.00026856791805311	0.22	0.6	Biological Process	GO:0071219	cellular response to molecule of bacterial origin	0.00026856791805311	0.00205143404072206	3	5
GO:0005992 trehalose biosynthetic process	8	0.000279741987763474	0.587	0.143	Biological Process	GO:0005992	trehalose biosynthetic process	0.000279741987763474	0.00212478183964167	8	56
GO:0007568 aging	7	0.000294024094975783	0.514	0.163	Biological Process	GO:0007568	aging	0.000294024094975783	0.00218417899124867	7	43
GO:0010150 leaf senescence	7	0.000294024094975783	0.514	0.163	Biological Process	GO:0010150	leaf senescence	0.000294024094975783	0.00218417899124867	7	43
GO:0090693 plant organ senescence	7	0.000294024094975783	0.514	0.163	Biological Process	GO:0090693	plant organ senescence	0.000294024094975783	0.00218417899124867	7	43
GO:2000031 regulation of salicylic acid mediated signaling pathway	7	0.000294024094975783	0.514	0.163	Biological Process	GO:2000031	regulation of salicylic acid mediated signaling pathway	0.000294024094975783	0.00218417899124867	7	43
GO:0016998 cell wall macromolecule catabolic process	12	0.00030909612384391	0.881	0.1	Biological Process	GO:0016998	cell wall macromolecule catabolic process	0.00030909612384391	0.00228359540675938	12	120
GO:0008289 lipid binding	37	0.000326070701146724	2.053	0.051	Molecular Function	GO:0008289	lipid binding	0.000326070701146724	0.00337543559150034	37	722
GO:0006865 amino acid transport	9	0.000368240503541909	0.661	0.123	Biological Process	GO:0006865	amino acid transport	0.000368240503541909	0.00270576717819924	9	73
GO:0044271 cellular nitrogen compound biosynthetic process	299	0.000395933651986592	21.953	0.036	Biological Process	GO:0044271	cellular nitrogen compound biosynthetic process	0.000395933651986592	0.00289352593235607	299	8225
GO:0000166 nucleotide binding	408	0.000397642189177084	22.642	0.032	Molecular Function	GO:0000166	nucleotide binding	0.000397642189177084	0.00396932113839268	408	12649
GO:1901265 nucleoside phosphate binding	408	0.000397642189177084	22.642	0.032	Molecular Function	GO:1901265	nucleoside phosphate binding	0.000397642189177084	0.00396932113839268	408	12649
GO:0005991 trehalose metabolic process	8	0.000402994169798047	0.587	0.136	Biological Process	GO:0005991	trehalose metabolic process	0.000402994169798047	0.00292929095466107	8	59
GO:0071407 cellular response to organic cyclic compound	12	0.000417991928312287	0.881	0.097	Biological Process	GO:0071407	cellular response to organic cyclic compound	0.000417991928312287	0.0030220592891883	12	124
GO:0036094 small molecule binding	422	0.000419199643933649	23.418	0.032	Molecular Function	GO:0036094	small molecule binding	0.000419199643933649	0.00411109826243701	422	13135
GO:0018958 phenol-containing compound metabolic process	6	0.000429908338450804	0.441	0.182	Biological Process	GO:0018958	phenol-containing compound metabolic process	0.000429908338450804	0.003091681242476	6	33
GO:0046394 carboxylic acid biosynthetic process	45	0.000481861464462534	3.304	0.052	Biological Process	GO:0046394	carboxylic acid biosynthetic process	0.000481861464462534	0.00344696666641982	45	872
GO:1900424 regulation of defense response to bacterium	4	0.0004898879493597	0.294	0.308	Biological Process	GO:1900424	regulation of defense response to bacterium	0.0004898879493597	0.0034859395133385	4	13
GO:0042752 regulation of circadian rhythm	6	0.000508682933875141	0.441	0.176	Biological Process	GO:0042752	regulation of circadian rhythm	0.000508682933875141	0.0036007294586345	6	34
GO:0060089 molecular transducer activity	26	0.000515075205782079	1.443	0.057	Molecular Function	GO:0060089	molecular transducer activity	0.000515075205782079	0.0049642593108997	26	456
GO:0002238 response to molecule of fungal origin	3	0.00052494024129561	0.22	0.5	Biological Process	GO:0002238	response to molecule of fungal origin	0.00052494024129561	0.0036395856729829	3	6
GO:0080136 priming of cellular response to stress	3	0.00052494024129561	0.22	0.5	Biological Process	GO:0080136	priming of cellular response to stress	0.00052494024129561	0.0036395856729829	3	6
GO:1901001 negative regulation of response to salt stress	3	0.00052494024129561	0.22	0.5	Biological Process	GO:1901001	negative regulation of response to salt stress	0.00052494024129561	0.0036395856729829	3	6
GO:1902065 response to L-glutamate	3	0.00052494024129561	0.22	0.5	Biological Process	GO:1902065	response to L-glutamate	0.00052494024129561	0.0036395856729829	3	6
GO:0010646 regulation of cell communication	18	0.000566314402860136	1.322	0.073	Biological Process	GO:0010646	regulation of cell communication	0.000566314402860136	0.00389202954601309	18	245
GO:0018298 protein-chromophore linkage	8	0.000567107855447174	0.587	0.129	Biological Process	GO:0018298	protein-chromophore linkage	0.000567107855447174	0.00389202954601309	8	62
GO:0015662 P-type ion transporter activity	8	0.00058368194281079	0.444	0.118	Molecular Function	GO:0015662	P-type ion transporter activity	0.00058368194281079	0.00553013908527511	8	68
GO:0030312 external encapsulating structure	28	0.000584180581930659	2.753	0.06	Cellular Component	GO:0030312	external encapsulating structure	0.000584180581930659	0.0303487348437151	28	467
GO:0009863 salicylic acid mediated signaling pathway	7	0.000588787100518696	0.514	0.146	Biological Process	GO:0009863	salicylic acid mediated signaling pathway	0.000588787100518696	0.00400491715093215	7	48
GO:0050832 defense response to fungus	14	0.00059014445196855	1.028	0.084	Biological Process	GO:0050832	defense response to fungus	0.00059014445196855	0.00400491715093215	14	166
GO:0006026 aminoglycan catabolic process	9	0.000604292232832957	0.661	0.115	Biological Process	GO:0006026	aminoglycan catabolic process	0.000604292232832957	0.00400491715093215	9	78
GO:0006030 chitin metabolic process	9	0.000604292232832957	0.661	0.115	Biological Process	GO:0006030	chitin metabolic process	0.000604292232832957	0.00400491715093215	9	78
GO:0006032 chitin catabolic process	9	0.000604292232832957	0.661	0.115	Biological Process	GO:0006032	chitin catabolic process	0.000604292232832957	0.00400491715093215	9	78
GO:0046348 amino sugar catabolic process	9	0.000604292232832957	0.661	0.115	Biological Process	GO:0046348	amino sugar catabolic process	0.000604292232832957	0.00400491715093215	9	78
GO:1901072 glucosamine-containing compound catabolic process	9	0.000604292232832957	0.661	0.115	Biological Process	GO:1901072	glucosamine-containing compound catabolic process	0.000604292232832957	0.00400491715093215	9	78
GO:0016757 glycosyltransferase activity	91	0.00064659432937195	5.05	0.039	Molecular Function	GO:0016757	glycosyltransferase activity	0.00064659432937195	0.00602410383531533	91	2315
GO:1903825 organic acid transmembrane transport	9	0.000663822191597825	0.661	0.114	Biological Process	GO:1903825	organic acid transmembrane transport	0.000663822191597825	0.00435673593708864	9	79
GO:1905039 carboxylic acid transmembrane transport	9	0.000663822191597825	0.661	0.114	Biological Process	GO:1905039	carboxylic acid transmembrane transport	0.000663822191597825	0.00435673593708864	9	79
GO:0048471 perinuclear region of cytoplasm	4	0.000668618030356046	0.393	0.286	Cellular Component	GO:0048471	perinuclear region of cytoplasm	0.000668618030356046	0.0303487348437151	4	14
GO:0000165 MAPK cascade	5	0.000679521446157734	0.367	0.208	Biological Process	GO:0000165	MAPK cascade	0.000679521446157734	0.00443822702997709	5	24
GO:0006022 aminoglycan metabolic process	9	0.000728053810522896	0.661	0.113	Biological Process	GO:0006022	aminoglycan metabolic process	0.000728053810522896	0.00473234976839882	9	80
GO:0051049 regulation of transport	10	0.000754611575385627	0.734	0.103	Biological Process	GO:0051049	regulation of transport	0.000754611575385627	0.00488150645895391	10	97
GO:0004568 chitinase activity	9	0.000763934784468302	0.499	0.102	Molecular Function	GO:0004568	chitinase activity	0.000763934784468302	0.0070006482707833	9	88
GO:0140358 P-type transmembrane transporter activity	8	0.000780930510872286	0.444	0.113	Molecular Function	GO:0140358	P-type transmembrane transporter activity	0.000780930510872286	0.00704097025125174	8	71
GO:0005984 disaccharide metabolic process	12	0.000785346641984196	0.881	0.09	Biological Process	GO:0005984	disaccharide metabolic process	0.000785346641984196	0.00505613647601254	12	133
GO:0044283 small molecule biosynthetic process	56	0.000797096263931582	4.112	0.047	Biological Process	GO:0044283	small molecule biosynthetic process	0.000797096263931582	0.00508441858411134	56	1179
GO:1901071 glucosamine-containing compound metabolic process	9	0.00079726090224231	0.661	0.111	Biological Process	GO:1901071	glucosamine-containing compound metabolic process	0.00079726090224231	0.00508441858411134	9	81
GO:0071446 cellular response to salicylic acid stimulus	7	0.000855498689140279	0.514	0.137	Biological Process	GO:0071446	cellular response to salicylic acid stimulus	0.000855498689140279	0.00543020764186694	7	51
GO:0043200 response to amino acid	3	0.000897820179099476	0.22	0.429	Biological Process	GO:0043200	response to amino acid	0.000897820179099476	0.00564582735880228	3	7
GO:0050826 response to freezing	3	0.000897820179099476	0.22	0.429	Biological Process	GO:0050826	response to freezing	0.000897820179099476	0.00564582735880228	3	7
GO:0031004 potassium ion-transporting ATPase complex	2	0.000925266306210827	0.197	1	Cellular Component	GO:0031004	potassium ion-transporting ATPase complex	0.000925266306210827	0.0303487348437151	2	2
GO:0090533 cation-transporting ATPase complex	2	0.000925266306210827	0.197	1	Cellular Component	GO:0090533	cation-transporting ATPase complex	0.000925266306210827	0.0303487348437151	2	2
GO:0018131 oxazole or thiazole biosynthetic process	2	0.000925427511273556	0.147	1	Biological Process	GO:0018131	oxazole or thiazole biosynthetic process	0.000925427511273556	0.0057131415307847	2	2
GO:0046484 oxazole or thiazole metabolic process	2	0.000925427511273556	0.147	1	Biological Process	GO:0046484	oxazole or thiazole metabolic process	0.000925427511273556	0.0057131415307847	2	2
GO:0098755 maintenance of seed dormancy by absisic acid	2	0.000925427511273556	0.147	1	Biological Process	GO:0098755	maintenance of seed dormancy by absisic acid	0.000925427511273556	0.0057131415307847	2	2
GO:1990414 replication-born double-strand break repair via sister chromatid exchange	2	0.000925427511273556	0.147	1	Biological Process	GO:1990414	replication-born double-strand break repair via sister chromatid exchange	0.000925427511273556	0.0057131415307847	2	2
GO:0010224 response to UV-B	6	0.000941554436458534	0.441	0.158	Biological Process	GO:0010224	response to UV-B	0.000941554436458534	0.00578627999132699	6	38
GO:0044238 primary metabolic process	876	0.000990936798471599	64.317	0.032	Biological Process	GO:0044238	primary metabolic process	0.000990936798471599	0.00606220159064978	876	26972
GO:0034645 cellular macromolecule biosynthetic process	296	0.00101798076169685	21.733	0.036	Biological Process	GO:0034645	cellular macromolecule biosynthetic process	0.00101798076169685	0.00619959454871232	296	8255
GO:0009734 auxin-activated signaling pathway	17	0.00103524055679012	1.248	0.072	Biological Process	GO:0009734	auxin-activated signaling pathway	0.00103524055679012	0.00624841621776895	17	237
GO:0071365 cellular response to auxin stimulus	17	0.00103524055679012	1.248	0.072	Biological Process	GO:0071365	cellular response to auxin stimulus	0.00103524055679012	0.00624841621776895	17	237
GO:0042026 protein refolding	7	0.00108065841651424	0.514	0.132	Biological Process	GO:0042026	protein refolding	0.00108065841651424	0.00649355635167671	7	53
GO:0005546 phosphatidylinositol-4,5-bisphosphate binding	11	0.00110848865521444	0.61	0.084	Molecular Function	GO:0005546	phosphatidylinositol-4,5-bisphosphate binding	0.00110848865521444	0.00983563743277579	11	131
GO:0009311 oligosaccharide metabolic process	13	0.00114585285842134	0.954	0.082	Biological Process	GO:0009311	oligosaccharide metabolic process	0.00114585285842134	0.00678494020098467	13	158
GO:0006935 chemotaxis	4	0.00115926123256469	0.294	0.25	Biological Process	GO:0006935	chemotaxis	0.00115926123256469	0.00678494020098467	4	16
GO:0010183 pollen tube guidance	4	0.00115926123256469	0.294	0.25	Biological Process	GO:0010183	pollen tube guidance	0.00115926123256469	0.00678494020098467	4	16
GO:0042330 taxis	4	0.00115926123256469	0.294	0.25	Biological Process	GO:0042330	taxis	0.00115926123256469	0.00678494020098467	4	16
GO:0046189 phenol-containing compound biosynthetic process	4	0.00115926123256469	0.294	0.25	Biological Process	GO:0046189	phenol-containing compound biosynthetic process	0.00115926123256469	0.00678494020098467	4	16
GO:0050918 positive chemotaxis	4	0.00115926123256469	0.294	0.25	Biological Process	GO:0050918	positive chemotaxis	0.00115926123256469	0.00678494020098467	4	16
GO:0009966 regulation of signal transduction	17	0.00118728455937787	1.248	0.071	Biological Process	GO:0009966	regulation of signal transduction	0.00118728455937787	0.00688930782952309	17	240
GO:0023051 regulation of signaling	17	0.00118728455937787	1.248	0.071	Biological Process	GO:0023051	regulation of signaling	0.00118728455937787	0.00688930782952309	17	240
GO:0046527 glucosyltransferase activity	22	0.00121042878573553	1.221	0.057	Molecular Function	GO:0046527	glucosyltransferase activity	0.00121042878573553	0.0104928083680744	22	383
GO:0061630 ubiquitin protein ligase activity	21	0.00123512021864126	1.165	0.058	Molecular Function	GO:0061630	ubiquitin protein ligase activity	0.00123512021864126	0.0104928083680744	21	359
GO:0004888 transmembrane signaling receptor activity	18	0.00123886467315369	0.999	0.063	Molecular Function	GO:0004888	transmembrane signaling receptor activity	0.00123886467315369	0.0104928083680744	18	287
GO:0010565 regulation of cellular ketone metabolic process	6	0.00124324681466353	0.441	0.15	Biological Process	GO:0010565	regulation of cellular ketone metabolic process	0.00124324681466353	0.00718320381805598	6	40
GO:0019748 secondary metabolic process	18	0.00127700219150606	1.322	0.068	Biological Process	GO:0019748	secondary metabolic process	0.00127700219150606	0.00734683814006889	18	263
GO:0051213 dioxygenase activity	14	0.00130406868857279	0.777	0.071	Molecular Function	GO:0051213	dioxygenase activity	0.00130406868857279	0.0108802148792864	14	197
GO:0006816 calcium ion transport	8	0.00140374768223074	0.587	0.113	Biological Process	GO:0006816	calcium ion transport	0.00140374768223074	0.00800930675393764	8	71
GO:0071216 cellular response to biotic stimulus	3	0.00140399829932191	0.22	0.375	Biological Process	GO:0071216	cellular response to biotic stimulus	0.00140399829932191	0.00800930675393764	3	8
GO:1902936 phosphatidylinositol bisphosphate binding	11	0.00141513659221829	0.61	0.081	Molecular Function	GO:1902936	phosphatidylinositol bisphosphate binding	0.00141513659221829	0.0116332552213238	11	135
GO:2000022 regulation of jasmonic acid mediated signaling pathway	5	0.00142062339074895	0.367	0.179	Biological Process	GO:2000022	regulation of jasmonic acid mediated signaling pathway	0.00142062339074895	0.008070095900389	5	28
GO:0009059 macromolecule biosynthetic process	296	0.0014666230242188	21.733	0.036	Biological Process	GO:0009059	macromolecule biosynthetic process	0.0014666230242188	0.00829654530855153	296	8305
GO:0008883 glutamyl-tRNA reductase activity	3	0.00157990965205718	0.166	0.333	Molecular Function	GO:0008883	glutamyl-tRNA reductase activity	0.00157990965205718	0.0127995579057965	3	9
GO:1901698 response to nitrogen compound	10	0.00160671349318311	0.734	0.093	Biological Process	GO:1901698	response to nitrogen compound	0.00160671349318311	0.00905115267826486	10	107
GO:0061659 ubiquitin-like protein ligase activity	21	0.00161647257471384	1.165	0.057	Molecular Function	GO:0061659	ubiquitin-like protein ligase activity	0.00161647257471384	0.0129086881323577	21	367
GO:0004707 MAP kinase activity	6	0.00163966382000653	0.333	0.13	Molecular Function	GO:0004707	MAP kinase activity	0.00163966382000653	0.0129094658504739	6	46
GO:0004553 hydrolase activity, hydrolyzing O-glycosyl compounds	61	0.00167550533161573	3.385	0.041	Molecular Function	GO:0004553	hydrolase activity, hydrolyzing O-glycosyl compounds	0.00167550533161573	0.0129264517005088	61	1481
GO:1901981 phosphatidylinositol phosphate binding	11	0.00168806972117557	0.61	0.08	Molecular Function	GO:1901981	phosphatidylinositol phosphate binding	0.00168806972117557	0.0129264517005088	11	138
GO:0042430 indole-containing compound metabolic process	9	0.0016938220811451	0.661	0.1	Biological Process	GO:0042430	indole-containing compound metabolic process	0.0016938220811451	0.00950227159215009	9	90
GO:0032879 regulation of localization	10	0.00172329031270493	0.734	0.093	Biological Process	GO:0032879	regulation of localization	0.00172329031270493	0.00962763844122752	10	108
GO:0016887 ATP hydrolysis activity	42	0.00182440712615674	2.331	0.045	Molecular Function	GO:0016887	ATP hydrolysis activity	0.00182440712615674	0.0137816700475895	42	935
GO:0009968 negative regulation of signal transduction	8	0.00183607664432839	0.587	0.108	Biological Process	GO:0009968	negative regulation of signal transduction	0.00183607664432839	0.0101321454005387	8	74
GO:0010648 negative regulation of cell communication	8	0.00183607664432839	0.587	0.108	Biological Process	GO:0010648	negative regulation of cell communication	0.00183607664432839	0.0101321454005387	8	74
GO:0023057 negative regulation of signaling	8	0.00183607664432839	0.587	0.108	Biological Process	GO:0023057	negative regulation of signaling	0.00183607664432839	0.0101321454005387	8	74
GO:0005543 phospholipid binding	19	0.00199589446010708	1.054	0.059	Molecular Function	GO:0005543	phospholipid binding	0.00199589446010708	0.0148760667093314	19	324
GO:0004805 trehalose-phosphatase activity	5	0.00203213669466177	0.277	0.152	Molecular Function	GO:0004805	trehalose-phosphatase activity	0.00203213669466177	0.0149469001620517	5	33
GO:0009625 response to insect	3	0.00205840557140352	0.22	0.333	Biological Process	GO:0009625	response to insect	0.00205840557140352	0.0112670620750509	3	9
GO:2000068 regulation of defense response to insect	3	0.00205840557140352	0.22	0.333	Biological Process	GO:2000068	regulation of defense response to insect	0.00205840557140352	0.0112670620750509	3	9
GO:0016053 organic acid biosynthetic process	45	0.00213621325796465	3.304	0.048	Biological Process	GO:0016053	organic acid biosynthetic process	0.00213621325796465	0.0116458077611621	45	940
GO:0102721 ubiquinol:oxygen oxidoreductase activity	3	0.00221052289658748	0.166	0.3	Molecular Function	GO:0102721	ubiquinol:oxygen oxidoreductase activity	0.00221052289658748	0.0160306127790707	3	10
GO:0004038 allantoinase activity	2	0.00226550699382216	0.111	0.667	Molecular Function	GO:0004038	allantoinase activity	0.00226550699382216	0.0160306127790707	2	3
GO:0050113 inositol oxygenase activity	2	0.00226550699382216	0.111	0.667	Molecular Function	GO:0050113	inositol oxygenase activity	0.00226550699382216	0.0160306127790707	2	3
GO:0009644 response to high light intensity	5	0.00227777758586531	0.367	0.161	Biological Process	GO:0009644	response to high light intensity	0.00227777758586531	0.0123657627842822	5	31
GO:0040011 locomotion	4	0.0022957148364311	0.294	0.211	Biological Process	GO:0040011	locomotion	0.0022957148364311	0.0123657627842822	4	19
GO:0080113 regulation of seed growth	4	0.0022957148364311	0.294	0.211	Biological Process	GO:0080113	regulation of seed growth	0.0022957148364311	0.0123657627842822	4	19
GO:0048868 pollen tube development	6	0.00231944153214242	0.441	0.133	Biological Process	GO:0048868	pollen tube development	0.00231944153214242	0.0124439879026054	6	45
GO:0016168 chlorophyll binding	8	0.002334522367425	0.444	0.095	Molecular Function	GO:0016168	chlorophyll binding	0.002334522367425	0.0163124750423822	8	84
GO:0048585 negative regulation of response to stimulus	11	0.00256193555549439	0.808	0.083	Biological Process	GO:0048585	negative regulation of response to stimulus	0.00256193555549439	0.0136906595692823	11	133
GO:0000256 allantoin catabolic process	2	0.00272003811252505	0.147	0.667	Biological Process	GO:0000256	allantoin catabolic process	0.00272003811252505	0.0141062431583362	2	3
GO:0010728 regulation of hydrogen peroxide biosynthetic process	2	0.00272003811252505	0.147	0.667	Biological Process	GO:0010728	regulation of hydrogen peroxide biosynthetic process	0.00272003811252505	0.0141062431583362	2	3
GO:0019310 inositol catabolic process	2	0.00272003811252505	0.147	0.667	Biological Process	GO:0019310	inositol catabolic process	0.00272003811252505	0.0141062431583362	2	3
GO:0080027 response to herbivore	2	0.00272003811252505	0.147	0.667	Biological Process	GO:0080027	response to herbivore	0.00272003811252505	0.0141062431583362	2	3
GO:0080140 regulation of jasmonic acid metabolic process	2	0.00272003811252505	0.147	0.667	Biological Process	GO:0080140	regulation of jasmonic acid metabolic process	0.00272003811252505	0.0141062431583362	2	3
GO:0080141 regulation of jasmonic acid biosynthetic process	2	0.00272003811252505	0.147	0.667	Biological Process	GO:0080141	regulation of jasmonic acid biosynthetic process	0.00272003811252505	0.0141062431583362	2	3
GO:1903426 regulation of reactive oxygen species biosynthetic process	2	0.00272003811252505	0.147	0.667	Biological Process	GO:1903426	regulation of reactive oxygen species biosynthetic process	0.00272003811252505	0.0141062431583362	2	3
GO:0009411 response to UV	7	0.0027231726807143	0.514	0.113	Biological Process	GO:0009411	response to UV	0.0027231726807143	0.0141062431583362	7	62
GO:0030001 metal ion transport	36	0.0027631828830308	2.643	0.05	Biological Process	GO:0030001	metal ion transport	0.0027631828830308	0.0142588673964032	36	719
GO:0009862 systemic acquired resistance, salicylic acid mediated signaling pathway	4	0.00280108529893064	0.294	0.2	Biological Process	GO:0009862	systemic acquired resistance, salicylic acid mediated signaling pathway	0.00280108529893064	0.0143449519854327	4	20
GO:0080112 seed growth	4	0.00280108529893064	0.294	0.2	Biological Process	GO:0080112	seed growth	0.00280108529893064	0.0143449519854327	4	20
GO:0035091 phosphatidylinositol binding	15	0.00289221730268956	0.832	0.063	Molecular Function	GO:0035091	phosphatidylinositol binding	0.00289221730268956	0.0199598700272033	15	238
GO:0044272 sulfur compound biosynthetic process	17	0.00299027633968304	1.248	0.065	Biological Process	GO:0044272	sulfur compound biosynthetic process	0.00299027633968304	0.0152560513632131	17	262
GO:0006073 cellular glucan metabolic process	26	0.0030505722826212	1.909	0.055	Biological Process	GO:0006073	cellular glucan metabolic process	0.0030505722826212	0.0155051643838491	26	473
GO:0044042 glucan metabolic process	26	0.0032252036028627	1.909	0.055	Biological Process	GO:0044042	glucan metabolic process	0.0032252036028627	0.0163313680564433	26	475
GO:0046165 alcohol biosynthetic process	8	0.0032542463924686	0.587	0.099	Biological Process	GO:0046165	alcohol biosynthetic process	0.0032542463924686	0.0164169444873789	8	81
GO:0005618 cell wall	25	0.00329228196180528	2.458	0.055	Cellular Component	GO:0005618	cell wall	0.00329228196180528	0.0899890402893443	25	452
GO:0006807 nitrogen compound metabolic process	764	0.00334582827840928	56.094	0.033	Biological Process	GO:0006807	nitrogen compound metabolic process	0.00334582827840928	0.0168162075554251	764	23474
GO:0042562 hormone binding	6	0.00341099194680458	0.333	0.113	Molecular Function	GO:0042562	hormone binding	0.00341099194680458	0.0232529816861434	6	53
GO:0006040 amino sugar metabolic process	9	0.00348880393828233	0.661	0.09	Biological Process	GO:0006040	amino sugar metabolic process	0.00348880393828233	0.0174698626835471	9	100
GO:0042180 cellular ketone metabolic process	10	0.00351587117348502	0.734	0.084	Biological Process	GO:0042180	cellular ketone metabolic process	0.00351587117348502	0.0175404347843238	10	119
GO:0090304 nucleic acid metabolic process	291	0.00385908794238247	21.366	0.035	Biological Process	GO:0090304	nucleic acid metabolic process	0.00385908794238247	0.0191819371253717	291	8291
GO:0071944 cell periphery	87	0.00386450386738331	8.555	0.041	Cellular Component	GO:0071944	cell periphery	0.00386450386738331	0.0905398048929804	87	2143
GO:0044264 cellular polysaccharide metabolic process	30	0.00404636879093388	2.203	0.051	Biological Process	GO:0044264	cellular polysaccharide metabolic process	0.00404636879093388	0.0200391597265297	30	583
GO:0004722 protein serine/threonine phosphatase activity	16	0.00405471144192799	0.888	0.059	Molecular Function	GO:0004722	protein serine/threonine phosphatase activity	0.00405471144192799	0.0273082373016596	16	271
GO:0043178 alcohol binding	6	0.004110668856134	0.333	0.109	Molecular Function	GO:0043178	alcohol binding	0.004110668856134	0.0273555225068917	6	55
GO:0044275 cellular carbohydrate catabolic process	10	0.00420005456177355	0.734	0.082	Biological Process	GO:0044275	cellular carbohydrate catabolic process	0.00420005456177355	0.0207243568157586	10	122
GO:0009739 response to gibberellin	7	0.00422595196418998	0.514	0.104	Biological Process	GO:0009739	response to gibberellin	0.00422595196418998	0.020730429401585	7	67
GO:0009738 abscisic acid-activated signaling pathway	11	0.00423616513790385	0.808	0.077	Biological Process	GO:0009738	abscisic acid-activated signaling pathway	0.00423616513790385	0.020730429401585	11	142
GO:0032787 monocarboxylic acid metabolic process	39	0.0042472847220703	2.863	0.048	Biological Process	GO:0032787	monocarboxylic acid metabolic process	0.0042472847220703	0.020730429401585	39	817
GO:0040008 regulation of growth	13	0.00436040438683586	0.954	0.071	Biological Process	GO:0040008	regulation of growth	0.00436040438683586	0.0212059954352593	13	184
GO:0044249 cellular biosynthetic process	376	0.00441569605998347	27.606	0.034	Biological Process	GO:0044249	cellular biosynthetic process	0.00441569605998347	0.0213979249931816	376	10979
GO:0005242 inward rectifier potassium channel activity	2	0.0044474909880696	0.111	0.5	Molecular Function	GO:0005242	inward rectifier potassium channel activity	0.0044474909880696	0.0282516757083058	2	4
GO:0010436 carotenoid dioxygenase activity	2	0.0044474909880696	0.111	0.5	Molecular Function	GO:0010436	carotenoid dioxygenase activity	0.0044474909880696	0.0282516757083058	2	4
GO:0016847 1-aminocyclopropane-1-carboxylate synthase activity	2	0.0044474909880696	0.111	0.5	Molecular Function	GO:0016847	1-aminocyclopropane-1-carboxylate synthase activity	0.0044474909880696	0.0282516757083058	2	4
GO:0099094 ligand-gated cation channel activity	2	0.0044474909880696	0.111	0.5	Molecular Function	GO:0099094	ligand-gated cation channel activity	0.0044474909880696	0.0282516757083058	2	4
GO:0004427 inorganic diphosphatase activity	5	0.00480266025264911	0.277	0.125	Molecular Function	GO:0004427	inorganic diphosphatase activity	0.00480266025264911	0.0301650233846163	5	40
GO:0003830 beta-1,4-mannosylglycoprotein 4-beta-N-acetylglucosaminyltransferase activity	3	0.00495042154404443	0.166	0.231	Molecular Function	GO:0003830	beta-1,4-mannosylglycoprotein 4-beta-N-acetylglucosaminyltransferase activity	0.00495042154404443	0.0307476182568982	3	13
GO:0009695 jasmonic acid biosynthetic process	3	0.00503488674276856	0.22	0.25	Biological Process	GO:0009695	jasmonic acid biosynthetic process	0.00503488674276856	0.0242710323261458	3	12
GO:0046351 disaccharide biosynthetic process	8	0.00504449710328919	0.587	0.092	Biological Process	GO:0046351	disaccharide biosynthetic process	0.00504449710328919	0.0242710323261458	8	87
GO:0000792 heterochromatin	2	0.00532931912426024	0.197	0.5	Cellular Component	GO:0000792	heterochromatin	0.00532931912426024	0.109251042047335	2	4
GO:0006145 purine nucleobase catabolic process	2	0.00533014931691715	0.147	0.5	Biological Process	GO:0006145	purine nucleobase catabolic process	0.00533014931691715	0.0251092748309128	2	4
GO:0010135 ureide metabolic process	2	0.00533014931691715	0.147	0.5	Biological Process	GO:0010135	ureide metabolic process	0.00533014931691715	0.0251092748309128	2	4
GO:0010136 ureide catabolic process	2	0.00533014931691715	0.147	0.5	Biological Process	GO:0010136	ureide catabolic process	0.00533014931691715	0.0251092748309128	2	4
GO:0018871 1-aminocyclopropane-1-carboxylate metabolic process	2	0.00533014931691715	0.147	0.5	Biological Process	GO:0018871	1-aminocyclopropane-1-carboxylate metabolic process	0.00533014931691715	0.0251092748309128	2	4
GO:0042218 1-aminocyclopropane-1-carboxylate biosynthetic process	2	0.00533014931691715	0.147	0.5	Biological Process	GO:0042218	1-aminocyclopropane-1-carboxylate biosynthetic process	0.00533014931691715	0.0251092748309128	2	4
GO:0045815 positive regulation of gene expression, epigenetic	2	0.00533014931691715	0.147	0.5	Biological Process	GO:0045815	positive regulation of gene expression, epigenetic	0.00533014931691715	0.0251092748309128	2	4
GO:0009312 oligosaccharide biosynthetic process	9	0.00545374853740297	0.661	0.084	Biological Process	GO:0009312	oligosaccharide biosynthetic process	0.00545374853740297	0.0256023195228084	9	107
GO:0009698 phenylpropanoid metabolic process	14	0.00573268338066862	1.028	0.066	Biological Process	GO:0009698	phenylpropanoid metabolic process	0.00573268338066862	0.0268023298410478	14	212
GO:0071215 cellular response to abscisic acid stimulus	11	0.00576884466253323	0.808	0.074	Biological Process	GO:0071215	cellular response to abscisic acid stimulus	0.00576884466253323	0.0268023298410478	11	148
GO:0097306 cellular response to alcohol	11	0.00576884466253323	0.808	0.074	Biological Process	GO:0097306	cellular response to alcohol	0.00576884466253323	0.0268023298410478	11	148
GO:0071704 organic substance metabolic process	915	0.00598168487564199	67.181	0.032	Biological Process	GO:0071704	organic substance metabolic process	0.00598168487564199	0.0276960203831095	915	28618
GO:0140677 molecular function activator activity	4	0.00622734487665585	0.222	0.148	Molecular Function	GO:0140677	molecular function activator activity	0.00622734487665585	0.0382536899566002	4	27
GO:1901576 organic substance biosynthetic process	380	0.00653423525202215	27.9	0.034	Biological Process	GO:1901576	organic substance biosynthetic process	0.00653423525202215	0.0301511469649623	380	11175
GO:0044247 cellular polysaccharide catabolic process	8	0.00660195634267212	0.587	0.088	Biological Process	GO:0044247	cellular polysaccharide catabolic process	0.00660195634267212	0.0303600169227643	8	91
GO:0016829 lyase activity	45	0.00661827034935036	2.497	0.041	Molecular Function	GO:0016829	lyase activity	0.00661827034935036	0.0402131861444223	45	1096
GO:0006725 cellular aromatic compound metabolic process	347	0.0069201856358993	25.477	0.034	Biological Process	GO:0006725	cellular aromatic compound metabolic process	0.0069201856358993	0.0317155626431724	347	10142
GO:0042435 indole-containing compound biosynthetic process	5	0.00704457582744815	0.367	0.125	Biological Process	GO:0042435	indole-containing compound biosynthetic process	0.00704457582744815	0.0321765760767226	5	40
GO:0022840 leak channel activity	2	0.00727616794735268	0.111	0.4	Molecular Function	GO:0022840	leak channel activity	0.00727616794735268	0.0428145040270542	2	5
GO:0022841 potassium ion leak channel activity	2	0.00727616794735268	0.111	0.4	Molecular Function	GO:0022841	potassium ion leak channel activity	0.00727616794735268	0.0428145040270542	2	5
GO:0022842 narrow pore channel activity	2	0.00727616794735268	0.111	0.4	Molecular Function	GO:0022842	narrow pore channel activity	0.00727616794735268	0.0428145040270542	2	5
GO:0009251 glucan catabolic process	8	0.00750519964130045	0.587	0.086	Biological Process	GO:0009251	glucan catabolic process	0.00750519964130045	0.0339950218947399	8	93
GO:0048638 regulation of developmental growth	8	0.00750519964130045	0.587	0.086	Biological Process	GO:0048638	regulation of developmental growth	0.00750519964130045	0.0339950218947399	8	93
GO:1901360 organic cyclic compound metabolic process	351	0.00751812984210595	25.771	0.034	Biological Process	GO:1901360	organic cyclic compound metabolic process	0.00751812984210595	0.0339950218947399	351	10283
GO:1901617 organic hydroxy compound biosynthetic process	12	0.00758008397840928	0.881	0.069	Biological Process	GO:1901617	organic hydroxy compound biosynthetic process	0.00758008397840928	0.0341377574059906	12	175
GO:0062012 regulation of small molecule metabolic process	6	0.00760019599053489	0.441	0.105	Biological Process	GO:0062012	regulation of small molecule metabolic process	0.00760019599053489	0.0341377574059906	6	57
GO:0002213 defense response to insect	3	0.00796085097727999	0.22	0.214	Biological Process	GO:0002213	defense response to insect	0.00796085097727999	0.0355216848887213	3	14
GO:0010310 regulation of hydrogen peroxide metabolic process	3	0.00796085097727999	0.22	0.214	Biological Process	GO:0010310	regulation of hydrogen peroxide metabolic process	0.00796085097727999	0.0355216848887213	3	14
GO:0098533 ATPase dependent transmembrane transport complex	2	0.00870325926377792	0.197	0.4	Cellular Component	GO:0098533	ATPase dependent transmembrane transport complex	0.00870325926377792	0.158592724362175	2	5
GO:0000255 allantoin metabolic process	2	0.00870453691615983	0.147	0.4	Biological Process	GO:0000255	allantoin metabolic process	0.00870453691615983	0.038323172472329	2	5
GO:0007584 response to nutrient	2	0.00870453691615983	0.147	0.4	Biological Process	GO:0007584	response to nutrient	0.00870453691615983	0.038323172472329	2	5
GO:0010231 maintenance of seed dormancy	2	0.00870453691615983	0.147	0.4	Biological Process	GO:0010231	maintenance of seed dormancy	0.00870453691615983	0.038323172472329	2	5
GO:0097437 maintenance of dormancy	2	0.00870453691615983	0.147	0.4	Biological Process	GO:0097437	maintenance of dormancy	0.00870453691615983	0.038323172472329	2	5
GO:0009058 biosynthetic process	391	0.00873042686499802	28.708	0.034	Biological Process	GO:0009058	biosynthetic process	0.00873042686499802	0.038323172472329	391	11578
GO:0009617 response to bacterium	14	0.00878841065865451	1.028	0.063	Biological Process	GO:0009617	response to bacterium	0.00878841065865451	0.0384528518139188	14	223
GO:0015849 organic acid transport	10	0.00933363417641263	0.734	0.073	Biological Process	GO:0015849	organic acid transport	0.00933363417641263	0.0407066884080964	10	137
GO:0032103 positive regulation of response to external stimulus	5	0.00956502811335869	0.367	0.116	Biological Process	GO:0032103	positive regulation of response to external stimulus	0.00956502811335869	0.041581729933315	5	43
GO:0031012 extracellular matrix	3	0.00972404828201018	0.295	0.2	Cellular Component	GO:0031012	extracellular matrix	0.00972404828201018	0.159474391824967	3	15
GO:0009687 abscisic acid metabolic process	3	0.00972835805909095	0.22	0.2	Biological Process	GO:0009687	abscisic acid metabolic process	0.00972835805909095	0.0417547304631459	3	15
GO:0042538 hyperosmotic salinity response	3	0.00972835805909095	0.22	0.2	Biological Process	GO:0042538	hyperosmotic salinity response	0.00972835805909095	0.0417547304631459	3	15
GO:0043288 apocarotenoid metabolic process	3	0.00972835805909095	0.22	0.2	Biological Process	GO:0043288	apocarotenoid metabolic process	0.00972835805909095	0.0417547304631459	3	15
GO:1902644 tertiary alcohol metabolic process	3	0.00972835805909095	0.22	0.2	Biological Process	GO:1902644	tertiary alcohol metabolic process	0.00972835805909095	0.0417547304631459	3	15
GO:0003991 acetylglutamate kinase activity	2	0.0107140124656228	0.111	0.333	Molecular Function	GO:0003991	acetylglutamate kinase activity	0.0107140124656228	0.0617436388482797	2	6
GO:0004112 cyclic-nucleotide phosphodiesterase activity	2	0.0107140124656228	0.111	0.333	Molecular Function	GO:0004112	cyclic-nucleotide phosphodiesterase activity	0.0107140124656228	0.0617436388482797	2	6
GO:0009631 cold acclimation	4	0.0110597108861332	0.294	0.138	Biological Process	GO:0009631	cold acclimation	0.0110597108861332	0.0473187630318104	4	29
GO:0019840 isoprenoid binding	5	0.0113501202027681	0.277	0.102	Molecular Function	GO:0019840	isoprenoid binding	0.0113501202027681	0.0647420121770142	5	49
GO:0031407 oxylipin metabolic process	5	0.0115528145166663	0.367	0.111	Biological Process	GO:0031407	oxylipin metabolic process	0.0115528145166663	0.0492725716925325	5	45
GO:0043169 cation binding	287	0.0123387537774342	15.927	0.031	Molecular Function	GO:0043169	cation binding	0.0123387537774342	0.0696703369857145	287	9132
GO:0006878 cellular copper ion homeostasis	2	0.0127943352535919	0.147	0.333	Biological Process	GO:0006878	cellular copper ion homeostasis	0.0127943352535919	0.0534570030175308	2	6
GO:0030007 cellular potassium ion homeostasis	2	0.0127943352535919	0.147	0.333	Biological Process	GO:0030007	cellular potassium ion homeostasis	0.0127943352535919	0.0534570030175308	2	6
GO:0043605 cellular amide catabolic process	2	0.0127943352535919	0.147	0.333	Biological Process	GO:0043605	cellular amide catabolic process	0.0127943352535919	0.0534570030175308	2	6
GO:0048439 flower morphogenesis	2	0.0127943352535919	0.147	0.333	Biological Process	GO:0048439	flower morphogenesis	0.0127943352535919	0.0534570030175308	2	6
GO:0050665 hydrogen peroxide biosynthetic process	2	0.0127943352535919	0.147	0.333	Biological Process	GO:0050665	hydrogen peroxide biosynthetic process	0.0127943352535919	0.0534570030175308	2	6
GO:1903409 reactive oxygen species biosynthetic process	2	0.0127943352535919	0.147	0.333	Biological Process	GO:1903409	reactive oxygen species biosynthetic process	0.0127943352535919	0.0534570030175308	2	6
GO:0009611 response to wounding	15	0.012810701906568	1.101	0.058	Biological Process	GO:0009611	response to wounding	0.012810701906568	0.0534570030175308	15	257
GO:0042742 defense response to bacterium	11	0.0130712334170961	0.808	0.066	Biological Process	GO:0042742	defense response to bacterium	0.0130712334170961	0.0543763310151196	11	166
GO:0010229 inflorescence development	3	0.0138971754456888	0.22	0.176	Biological Process	GO:0010229	inflorescence development	0.0138971754456888	0.057634911664329	3	17
GO:0016157 sucrose synthase activity	4	0.0141254460238452	0.222	0.118	Molecular Function	GO:0016157	sucrose synthase activity	0.0141254460238452	0.0789612432732948	4	34
GO:0071554 cell wall organization or biogenesis	43	0.0143260931521521	3.157	0.043	Biological Process	GO:0071554	cell wall organization or biogenesis	0.0143260931521521	0.0592320426351979	43	994
GO:0042578 phosphoric ester hydrolase activity	37	0.0147001840304923	2.053	0.041	Molecular Function	GO:0042578	phosphoric ester hydrolase activity	0.0147001840304923	0.0799157343345279	37	910
GO:0000145 exocyst	11	0.0147150125798439	1.082	0.065	Cellular Component	GO:0000145	exocyst	0.0147150125798439	0.219387460281308	11	169
GO:0052736 beta-glucanase activity	2	0.0147250816394568	0.111	0.286	Molecular Function	GO:0052736	beta-glucanase activity	0.0147250816394568	0.0799157343345279	2	7
GO:0052861 glucan endo-1,3-beta-glucanase activity, C-3 substituted reducing group	2	0.0147250816394568	0.111	0.286	Molecular Function	GO:0052861	glucan endo-1,3-beta-glucanase activity, C-3 substituted reducing group	0.0147250816394568	0.0799157343345279	2	7
GO:0050821 protein stabilization	4	0.0155876441034367	0.294	0.125	Biological Process	GO:0050821	protein stabilization	0.0155876441034367	0.064251508621483	4	32
GO:0008061 chitin binding	6	0.015896953128484	0.333	0.082	Molecular Function	GO:0008061	chitin binding	0.015896953128484	0.0848491234982374	6	73
GO:0016791 phosphatase activity	32	0.0159376707823165	1.776	0.042	Molecular Function	GO:0016791	phosphatase activity	0.0159376707823165	0.0848491234982374	32	767
GO:0016798 hydrolase activity, acting on glycosyl bonds	62	0.0161670300580801	3.441	0.037	Molecular Function	GO:0016798	hydrolase activity, acting on glycosyl bonds	0.0161670300580801	0.0852582056836491	62	1685
GO:0006972 hyperosmotic response	3	0.0163052471587064	0.22	0.167	Biological Process	GO:0006972	hyperosmotic response	0.0163052471587064	0.0665130651788242	3	18
GO:0019441 tryptophan catabolic process to kynurenine	3	0.0163052471587064	0.22	0.167	Biological Process	GO:0019441	tryptophan catabolic process to kynurenine	0.0163052471587064	0.0665130651788242	3	18
GO:0070189 kynurenine metabolic process	3	0.0163052471587064	0.22	0.167	Biological Process	GO:0070189	kynurenine metabolic process	0.0163052471587064	0.0665130651788242	3	18
GO:0061077 chaperone-mediated protein folding	5	0.016333089969948	0.367	0.102	Biological Process	GO:0061077	chaperone-mediated protein folding	0.016333089969948	0.0665130651788242	5	49
GO:0009627 systemic acquired resistance	7	0.0169073568206478	0.514	0.08	Biological Process	GO:0009627	systemic acquired resistance	0.0169073568206478	0.0686448841486963	7	87
GO:0004664 prephenate dehydratase activity	3	0.0170831317791119	0.166	0.15	Molecular Function	GO:0004664	prephenate dehydratase activity	0.0170831317791119	0.0888240833206317	3	20
GO:0005545 1-phosphatidylinositol binding	4	0.0171793702329052	0.222	0.111	Molecular Function	GO:0005545	1-phosphatidylinositol binding	0.0171793702329052	0.0888240833206317	4	36
GO:0008375 acetylglucosaminyltransferase activity	8	0.0173199017566169	0.444	0.068	Molecular Function	GO:0008375	acetylglucosaminyltransferase activity	0.0173199017566169	0.0888240833206317	8	118
GO:0016121 carotene catabolic process	2	0.0175529412833889	0.147	0.286	Biological Process	GO:0016121	carotene catabolic process	0.0175529412833889	0.0706296923069698	2	7
GO:0046247 terpene catabolic process	2	0.0175529412833889	0.147	0.286	Biological Process	GO:0046247	terpene catabolic process	0.0175529412833889	0.0706296923069698	2	7
GO:0120253 hydrocarbon catabolic process	2	0.0175529412833889	0.147	0.286	Biological Process	GO:0120253	hydrocarbon catabolic process	0.0175529412833889	0.0706296923069698	2	7
GO:0019439 aromatic compound catabolic process	23	0.0180961540200351	1.689	0.049	Biological Process	GO:0019439	aromatic compound catabolic process	0.0180961540200351	0.0725994072257787	23	469
GO:1901136 carbohydrate derivative catabolic process	10	0.0182719119562996	0.734	0.066	Biological Process	GO:1901136	carbohydrate derivative catabolic process	0.0182719119562996	0.0730876478251985	10	152
GO:0005976 polysaccharide metabolic process	34	0.0188467903546343	2.496	0.045	Biological Process	GO:0005976	polysaccharide metabolic process	0.0188467903546343	0.0750619079245392	34	764
GO:0051560 mitochondrial calcium ion homeostasis	3	0.018932034469133	0.22	0.158	Biological Process	GO:0051560	mitochondrial calcium ion homeostasis	0.018932034469133	0.0750619079245392	3	19
GO:2000280 regulation of root development	3	0.018932034469133	0.22	0.158	Biological Process	GO:2000280	regulation of root development	0.018932034469133	0.0750619079245392	3	19
GO:0003913 DNA photolyase activity	2	0.019274956220321	0.111	0.25	Molecular Function	GO:0003913	DNA photolyase activity	0.019274956220321	0.0970693741185535	2	8
GO:0008460 dTDP-glucose 4,6-dehydratase activity	2	0.019274956220321	0.111	0.25	Molecular Function	GO:0008460	dTDP-glucose 4,6-dehydratase activity	0.019274956220321	0.0970693741185535	2	8
GO:0102229 amylopectin maltohydrolase activity	3	0.0195265083247786	0.166	0.143	Molecular Function	GO:0102229	amylopectin maltohydrolase activity	0.0195265083247786	0.0974581977995646	3	21
GO:0110165 cellular anatomical entity	1012	0.0197386389562012	99.508	0.031	Cellular Component	GO:0110165	cellular anatomical entity	0.0197386389562012	0.269761399068083	1012	33027
GO:0046872 metal ion binding	282	0.0203190268021669	15.649	0.031	Molecular Function	GO:0046872	metal ion binding	0.0203190268021669	0.100516247631958	282	9063
GO:0000272 polysaccharide catabolic process	15	0.020928487761254	1.101	0.055	Biological Process	GO:0000272	polysaccharide catabolic process	0.020928487761254	0.0827348405064779	15	273
GO:0002684 positive regulation of immune system process	4	0.0211335990754268	0.294	0.114	Biological Process	GO:0002684	positive regulation of immune system process	0.0211335990754268	0.0830599591569098	4	35
GO:0050778 positive regulation of immune response	4	0.0211335990754268	0.294	0.114	Biological Process	GO:0050778	positive regulation of immune response	0.0211335990754268	0.0830599591569098	4	35
GO:0009110 vitamin biosynthetic process	10	0.0214662856273903	0.734	0.064	Biological Process	GO:0009110	vitamin biosynthetic process	0.0214662856273903	0.0841105565664085	10	156
GO:1901361 organic cyclic compound catabolic process	23	0.0215253347425868	1.689	0.048	Biological Process	GO:1901361	organic cyclic compound catabolic process	0.0215253347425868	0.0841105565664085	23	477
GO:0004721 phosphoprotein phosphatase activity	18	0.022162090537362	0.999	0.047	Molecular Function	GO:0004721	phosphoprotein phosphatase activity	0.022162090537362	0.108672005354258	18	383
GO:0048527 lateral root development	5	0.0222732048865816	0.367	0.094	Biological Process	GO:0048527	lateral root development	0.0222732048865816	0.0867820547742313	5	53
GO:0140103 catalytic activity, acting on a glycoprotein	4	0.0224799447779896	0.222	0.103	Molecular Function	GO:0140103	catalytic activity, acting on a glycoprotein	0.0224799447779896	0.109272079399097	4	39
GO:0044237 cellular metabolic process	833	0.0226174272388052	61.16	0.032	Biological Process	GO:0044237	cellular metabolic process	0.0226174272388052	0.0873503293520038	833	26181
GO:0042364 water-soluble vitamin biosynthetic process	9	0.0226224862494601	0.661	0.067	Biological Process	GO:0042364	water-soluble vitamin biosynthetic process	0.0226224862494601	0.0873503293520038	9	135
GO:0010162 seed dormancy process	2	0.0229359222780779	0.147	0.25	Biological Process	GO:0010162	seed dormancy process	0.0229359222780779	0.0873503293520038	2	8
GO:0019217 regulation of fatty acid metabolic process	2	0.0229359222780779	0.147	0.25	Biological Process	GO:0019217	regulation of fatty acid metabolic process	0.0229359222780779	0.0873503293520038	2	8
GO:0022611 dormancy process	2	0.0229359222780779	0.147	0.25	Biological Process	GO:0022611	dormancy process	0.0229359222780779	0.0873503293520038	2	8
GO:0034059 response to anoxia	2	0.0229359222780779	0.147	0.25	Biological Process	GO:0034059	response to anoxia	0.0229359222780779	0.0873503293520038	2	8
GO:0042304 regulation of fatty acid biosynthetic process	2	0.0229359222780779	0.147	0.25	Biological Process	GO:0042304	regulation of fatty acid biosynthetic process	0.0229359222780779	0.0873503293520038	2	8
GO:1900376 regulation of secondary metabolite biosynthetic process	2	0.0229359222780779	0.147	0.25	Biological Process	GO:1900376	regulation of secondary metabolite biosynthetic process	0.0229359222780779	0.0873503293520038	2	8
GO:0031647 regulation of protein stability	4	0.0232178847570979	0.294	0.111	Biological Process	GO:0031647	regulation of protein stability	0.0232178847570979	0.0881757870550459	4	36
GO:0008219 cell death	7	0.0234923454023154	0.514	0.075	Biological Process	GO:0008219	cell death	0.0234923454023154	0.0889682100390209	7	93
GO:0004788 thiamine diphosphokinase activity	2	0.0243306838112535	0.111	0.222	Molecular Function	GO:0004788	thiamine diphosphokinase activity	0.0243306838112535	0.112403737607361	2	9
GO:0008940 nitrate reductase activity	2	0.0243306838112535	0.111	0.222	Molecular Function	GO:0008940	nitrate reductase activity	0.0243306838112535	0.112403737607361	2	9
GO:0030975 thiamine binding	2	0.0243306838112535	0.111	0.222	Molecular Function	GO:0030975	thiamine binding	0.0243306838112535	0.112403737607361	2	9
GO:0043546 molybdopterin cofactor binding	2	0.0243306838112535	0.111	0.222	Molecular Function	GO:0043546	molybdopterin cofactor binding	0.0243306838112535	0.112403737607361	2	9
GO:0050463 nitrate reductase [NAD(P)H] activity	2	0.0243306838112535	0.111	0.222	Molecular Function	GO:0050463	nitrate reductase [NAD(P)H] activity	0.0243306838112535	0.112403737607361	2	9
GO:0050464 nitrate reductase (NADPH) activity	2	0.0243306838112535	0.111	0.222	Molecular Function	GO:0050464	nitrate reductase (NADPH) activity	0.0243306838112535	0.112403737607361	2	9
GO:0006569 tryptophan catabolic process	3	0.0248455195512279	0.22	0.143	Biological Process	GO:0006569	tryptophan catabolic process	0.0248455195512279	0.0922833583331322	3	21
GO:0009788 negative regulation of abscisic acid-activated signaling pathway	3	0.0248455195512279	0.22	0.143	Biological Process	GO:0009788	negative regulation of abscisic acid-activated signaling pathway	0.0248455195512279	0.0922833583331322	3	21
GO:0042436 indole-containing compound catabolic process	3	0.0248455195512279	0.22	0.143	Biological Process	GO:0042436	indole-containing compound catabolic process	0.0248455195512279	0.0922833583331322	3	21
GO:0042762 regulation of sulfur metabolic process	3	0.0248455195512279	0.22	0.143	Biological Process	GO:0042762	regulation of sulfur metabolic process	0.0248455195512279	0.0922833583331322	3	21
GO:0046218 indolalkylamine catabolic process	3	0.0248455195512279	0.22	0.143	Biological Process	GO:0046218	indolalkylamine catabolic process	0.0248455195512279	0.0922833583331322	3	21
GO:1901420 negative regulation of response to alcohol	3	0.0248455195512279	0.22	0.143	Biological Process	GO:1901420	negative regulation of response to alcohol	0.0248455195512279	0.0922833583331322	3	21
GO:1905958 negative regulation of cellular response to alcohol	3	0.0248455195512279	0.22	0.143	Biological Process	GO:1905958	negative regulation of cellular response to alcohol	0.0248455195512279	0.0922833583331322	3	21
GO:0090698 post-embryonic plant morphogenesis	6	0.0252221924332121	0.441	0.081	Biological Process	GO:0090698	post-embryonic plant morphogenesis	0.0252221924332121	0.0934257648485007	6	74
GO:0072528 pyrimidine-containing compound biosynthetic process	9	0.025631337127736	0.661	0.065	Biological Process	GO:0072528	pyrimidine-containing compound biosynthetic process	0.025631337127736	0.0946818792259536	9	138
GO:0040007 growth	16	0.0262643721173184	1.175	0.052	Biological Process	GO:0040007	growth	0.0262643721173184	0.0967559430588951	16	306
GO:0001653 peptide receptor activity	1	0.0277452731415904	0.055	1	Molecular Function	GO:0001653	peptide receptor activity	0.0277452731415904	0.118393951802664	1	1
GO:0009978 allene oxide synthase activity	1	0.0277452731415904	0.055	1	Molecular Function	GO:0009978	allene oxide synthase activity	0.0277452731415904	0.118393951802664	1	1
GO:0017046 peptide hormone binding	1	0.0277452731415904	0.055	1	Molecular Function	GO:0017046	peptide hormone binding	0.0277452731415904	0.118393951802664	1	1
GO:0018392 glycoprotein 3-alpha-L-fucosyltransferase activity	1	0.0277452731415904	0.055	1	Molecular Function	GO:0018392	glycoprotein 3-alpha-L-fucosyltransferase activity	0.0277452731415904	0.118393951802664	1	1
GO:0043864 indoleacetamide hydrolase activity	1	0.0277452731415904	0.055	1	Molecular Function	GO:0043864	indoleacetamide hydrolase activity	0.0277452731415904	0.118393951802664	1	1
GO:0046870 cadmium ion binding	1	0.0277452731415904	0.055	1	Molecular Function	GO:0046870	cadmium ion binding	0.0277452731415904	0.118393951802664	1	1
GO:0046920 alpha-(1->3)-fucosyltransferase activity	1	0.0277452731415904	0.055	1	Molecular Function	GO:0046920	alpha-(1->3)-fucosyltransferase activity	0.0277452731415904	0.118393951802664	1	1
GO:0047631 ADP-ribose diphosphatase activity	1	0.0277452731415904	0.055	1	Molecular Function	GO:0047631	ADP-ribose diphosphatase activity	0.0277452731415904	0.118393951802664	1	1
GO:0047654 alliin lyase activity	1	0.0277452731415904	0.055	1	Molecular Function	GO:0047654	alliin lyase activity	0.0277452731415904	0.118393951802664	1	1
GO:1990275 preribosome binding	1	0.0277452731415904	0.055	1	Molecular Function	GO:1990275	preribosome binding	0.0277452731415904	0.118393951802664	1	1
GO:0002833 positive regulation of response to biotic stimulus	4	0.0277489984419856	0.294	0.105	Biological Process	GO:0002833	positive regulation of response to biotic stimulus	0.0277489984419856	0.101947407319469	4	38
GO:0009310 amine catabolic process	3	0.028132218013812	0.22	0.136	Biological Process	GO:0009310	amine catabolic process	0.028132218013812	0.102796645282902	3	22
GO:0042402 cellular biogenic amine catabolic process	3	0.028132218013812	0.22	0.136	Biological Process	GO:0042402	cellular biogenic amine catabolic process	0.028132218013812	0.102796645282902	3	22
GO:0090696 post-embryonic plant organ development	6	0.0283052971039827	0.441	0.079	Biological Process	GO:0090696	post-embryonic plant organ development	0.0283052971039827	0.103150301036616	6	76
GO:0006809 nitric oxide biosynthetic process	2	0.0289009270514135	0.147	0.222	Biological Process	GO:0006809	nitric oxide biosynthetic process	0.0289009270514135	0.104197475662696	2	9
GO:0042814 monopolar cell growth	2	0.0289009270514135	0.147	0.222	Biological Process	GO:0042814	monopolar cell growth	0.0289009270514135	0.104197475662696	2	9
GO:0046209 nitric oxide metabolic process	2	0.0289009270514135	0.147	0.222	Biological Process	GO:0046209	nitric oxide metabolic process	0.0289009270514135	0.104197475662696	2	9
GO:0051513 regulation of monopolar cell growth	2	0.0289009270514135	0.147	0.222	Biological Process	GO:0051513	regulation of monopolar cell growth	0.0289009270514135	0.104197475662696	2	9
GO:0009733 response to auxin	27	0.0296535919620977	1.982	0.045	Biological Process	GO:0009733	response to auxin	0.0296535919620977	0.105496469747072	27	600
GO:0009931 calcium-dependent protein serine/threonine kinase activity	2	0.02986072403992	0.111	0.2	Molecular Function	GO:0009931	calcium-dependent protein serine/threonine kinase activity	0.02986072403992	0.126455641956934	2	10
GO:0031349 positive regulation of defense response	4	0.0301980942981153	0.294	0.103	Biological Process	GO:0031349	positive regulation of defense response	0.0301980942981153	0.105496469747072	4	39
GO:0009061 anaerobic respiration	1	0.0304316739655016	0.073	1	Biological Process	GO:0009061	anaerobic respiration	0.0304316739655016	0.105496469747072	1	1
GO:0051972 regulation of telomerase activity	1	0.0304316739655016	0.073	1	Biological Process	GO:0051972	regulation of telomerase activity	0.0304316739655016	0.105496469747072	1	1
GO:0051973 positive regulation of telomerase activity	1	0.0304316739655016	0.073	1	Biological Process	GO:0051973	positive regulation of telomerase activity	0.0304316739655016	0.105496469747072	1	1
GO:0052837 thiazole biosynthetic process	1	0.0304316739655016	0.073	1	Biological Process	GO:0052837	thiazole biosynthetic process	0.0304316739655016	0.105496469747072	1	1
GO:0052838 thiazole metabolic process	1	0.0304316739655016	0.073	1	Biological Process	GO:0052838	thiazole metabolic process	0.0304316739655016	0.105496469747072	1	1
GO:0055073 cadmium ion homeostasis	1	0.0304316739655016	0.073	1	Biological Process	GO:0055073	cadmium ion homeostasis	0.0304316739655016	0.105496469747072	1	1
GO:0090548 response to nitrate starvation	1	0.0304316739655016	0.073	1	Biological Process	GO:0090548	response to nitrate starvation	0.0304316739655016	0.105496469747072	1	1
GO:1901141 regulation of lignin biosynthetic process	1	0.0304316739655016	0.073	1	Biological Process	GO:1901141	regulation of lignin biosynthetic process	0.0304316739655016	0.105496469747072	1	1
GO:1901333 positive regulation of lateral root development	1	0.0304316739655016	0.073	1	Biological Process	GO:1901333	positive regulation of lateral root development	0.0304316739655016	0.105496469747072	1	1
GO:1902025 nitrate import	1	0.0304316739655016	0.073	1	Biological Process	GO:1902025	nitrate import	0.0304316739655016	0.105496469747072	1	1
GO:2000023 regulation of lateral root development	1	0.0304316739655016	0.073	1	Biological Process	GO:2000023	regulation of lateral root development	0.0304316739655016	0.105496469747072	1	1
GO:2000278 regulation of DNA biosynthetic process	1	0.0304316739655016	0.073	1	Biological Process	GO:2000278	regulation of DNA biosynthetic process	0.0304316739655016	0.105496469747072	1	1
GO:2000573 positive regulation of DNA biosynthetic process	1	0.0304316739655016	0.073	1	Biological Process	GO:2000573	positive regulation of DNA biosynthetic process	0.0304316739655016	0.105496469747072	1	1
GO:0006766 vitamin metabolic process	10	0.0311969857115747	0.734	0.06	Biological Process	GO:0006766	vitamin metabolic process	0.0311969857115747	0.10787295315102	10	166
GO:0048528 post-embryonic root development	5	0.0314596350786931	0.367	0.086	Biological Process	GO:0048528	post-embryonic root development	0.0314596350786931	0.108289220266692	5	58
GO:0009094 L-phenylalanine biosynthetic process	3	0.0316377529625321	0.22	0.13	Biological Process	GO:0009094	L-phenylalanine biosynthetic process	0.0316377529625321	0.108289220266692	3	23
GO:1902223 erythrose 4-phosphate/phosphoenolpyruvate family amino acid biosynthetic process	3	0.0316377529625321	0.22	0.13	Biological Process	GO:1902223	erythrose 4-phosphate/phosphoenolpyruvate family amino acid biosynthetic process	0.0316377529625321	0.108289220266692	3	23
GO:2000377 regulation of reactive oxygen species metabolic process	3	0.0316377529625321	0.22	0.13	Biological Process	GO:2000377	regulation of reactive oxygen species metabolic process	0.0316377529625321	0.108289220266692	3	23
GO:0030527 structural constituent of chromatin	24	0.0318814455165517	1.332	0.042	Molecular Function	GO:0030527	structural constituent of chromatin	0.0318814455165517	0.133997955216184	24	573
GO:0050664 oxidoreductase activity, acting on NAD(P)H, oxygen as acceptor	4	0.0333127957257336	0.222	0.091	Molecular Function	GO:0050664	oxidoreductase activity, acting on NAD(P)H, oxygen as acceptor	0.0333127957257336	0.138969050826008	4	44
GO:0005938 cell cortex	11	0.0336923368757227	1.082	0.057	Cellular Component	GO:0005938	cell cortex	0.0336923368757227	0.425041788278348	11	192
GO:0006767 water-soluble vitamin metabolic process	9	0.0337309347043716	0.661	0.062	Biological Process	GO:0006767	water-soluble vitamin metabolic process	0.0337309347043716	0.115162181111895	9	145
GO:0019203 carbohydrate phosphatase activity	5	0.0343449005441165	0.277	0.077	Molecular Function	GO:0019203	carbohydrate phosphatase activity	0.0343449005441165	0.141703739695906	5	65
GO:0033897 ribonuclease T2 activity	3	0.0344753284412221	0.166	0.115	Molecular Function	GO:0033897	ribonuclease T2 activity	0.0344753284412221	0.141703739695906	3	26
GO:0031667 response to nutrient levels	7	0.0347541020462852	0.514	0.069	Biological Process	GO:0031667	response to nutrient levels	0.0347541020462852	0.118356538958634	7	101
GO:0010112 regulation of systemic acquired resistance	3	0.0353605065660964	0.22	0.125	Biological Process	GO:0010112	regulation of systemic acquired resistance	0.0353605065660964	0.118786789003567	3	24
GO:0010311 lateral root formation	3	0.0353605065660964	0.22	0.125	Biological Process	GO:0010311	lateral root formation	0.0353605065660964	0.118786789003567	3	24
GO:0009229 thiamine diphosphate biosynthetic process	2	0.035407600568371	0.147	0.2	Biological Process	GO:0009229	thiamine diphosphate biosynthetic process	0.035407600568371	0.118786789003567	2	10
GO:0042357 thiamine diphosphate metabolic process	2	0.035407600568371	0.147	0.2	Biological Process	GO:0042357	thiamine diphosphate metabolic process	0.035407600568371	0.118786789003567	2	10
GO:0046113 nucleobase catabolic process	2	0.035407600568371	0.147	0.2	Biological Process	GO:0046113	nucleobase catabolic process	0.035407600568371	0.118786789003567	2	10
GO:0090332 stomatal closure	2	0.035407600568371	0.147	0.2	Biological Process	GO:0090332	stomatal closure	0.035407600568371	0.118786789003567	2	10
GO:0008792 arginine decarboxylase activity	2	0.0358348956421927	0.111	0.182	Molecular Function	GO:0008792	arginine decarboxylase activity	0.0358348956421927	0.143083619028469	2	11
GO:0009001 serine O-acetyltransferase activity	2	0.0358348956421927	0.111	0.182	Molecular Function	GO:0009001	serine O-acetyltransferase activity	0.0358348956421927	0.143083619028469	2	11
GO:0016412 serine O-acyltransferase activity	2	0.0358348956421927	0.111	0.182	Molecular Function	GO:0016412	serine O-acyltransferase activity	0.0358348956421927	0.143083619028469	2	11
GO:0047216 inositol 3-alpha-galactosyltransferase activity	2	0.0358348956421927	0.111	0.182	Molecular Function	GO:0047216	inositol 3-alpha-galactosyltransferase activity	0.0358348956421927	0.143083619028469	2	11
GO:0006887 exocytosis	11	0.0360165735760955	0.808	0.057	Biological Process	GO:0006887	exocytosis	0.0360165735760955	0.120530711571488	11	194
GO:0072527 pyrimidine-containing compound metabolic process	9	0.0376890964029252	0.661	0.061	Biological Process	GO:0072527	pyrimidine-containing compound metabolic process	0.0376890964029252	0.125816440337666	9	148
GO:0045927 positive regulation of growth	5	0.0379588321211771	0.367	0.082	Biological Process	GO:0045927	positive regulation of growth	0.0379588321211771	0.126379339661412	5	61
GO:0048366 leaf development	7	0.0380446680785464	0.514	0.068	Biological Process	GO:0048366	leaf development	0.0380446680785464	0.126379339661412	7	103
GO:0010941 regulation of cell death	4	0.0382887214861744	0.294	0.095	Biological Process	GO:0010941	regulation of cell death	0.0382887214861744	0.126878312375754	4	42
GO:0005544 calcium-dependent phospholipid binding	4	0.0383628181033992	0.222	0.087	Molecular Function	GO:0005544	calcium-dependent phospholipid binding	0.0383628181033992	0.151019826195776	4	46
GO:0010427 abscisic acid binding	4	0.0383628181033992	0.222	0.087	Molecular Function	GO:0010427	abscisic acid binding	0.0383628181033992	0.151019826195776	4	46
GO:0010215 cellulose microfibril organization	4	0.0412347413192837	0.294	0.093	Biological Process	GO:0010215	cellulose microfibril organization	0.0412347413192837	0.13466031464655	4	43
GO:0030198 extracellular matrix organization	4	0.0412347413192837	0.294	0.093	Biological Process	GO:0030198	extracellular matrix organization	0.0412347413192837	0.13466031464655	4	43
GO:0043062 extracellular structure organization	4	0.0412347413192837	0.294	0.093	Biological Process	GO:0043062	extracellular structure organization	0.0412347413192837	0.13466031464655	4	43
GO:0048268 clathrin coat assembly	4	0.0412347413192837	0.294	0.093	Biological Process	GO:0048268	clathrin coat assembly	0.0412347413192837	0.13466031464655	4	43
GO:0070726 cell wall assembly	4	0.0412347413192837	0.294	0.093	Biological Process	GO:0070726	cell wall assembly	0.0412347413192837	0.13466031464655	4	43
GO:0071668 plant-type cell wall assembly	4	0.0412347413192837	0.294	0.093	Biological Process	GO:0071668	plant-type cell wall assembly	0.0412347413192837	0.13466031464655	4	43
GO:0051253 negative regulation of RNA metabolic process	11	0.0420179459353438	0.808	0.055	Biological Process	GO:0051253	negative regulation of RNA metabolic process	0.0420179459353438	0.136869838803552	11	199
GO:0004683 calmodulin-dependent protein kinase activity	2	0.0422243253925348	0.111	0.167	Molecular Function	GO:0004683	calmodulin-dependent protein kinase activity	0.0422243253925348	0.162782054444324	2	12
GO:0016812 hydrolase activity, acting on carbon-nitrogen (but not peptide) bonds, in cyclic amides	2	0.0422243253925348	0.111	0.167	Molecular Function	GO:0016812	hydrolase activity, acting on carbon-nitrogen (but not peptide) bonds, in cyclic amides	0.0422243253925348	0.162782054444324	2	12
GO:0046857 oxidoreductase activity, acting on other nitrogenous compounds as donors, with NAD or NADP as acceptor	2	0.0422243253925348	0.111	0.167	Molecular Function	GO:0046857	oxidoreductase activity, acting on other nitrogenous compounds as donors, with NAD or NADP as acceptor	0.0422243253925348	0.162782054444324	2	12
GO:0010364 regulation of ethylene biosynthetic process	2	0.0424175018185564	0.147	0.182	Biological Process	GO:0010364	regulation of ethylene biosynthetic process	0.0424175018185564	0.136869838803552	2	11
GO:0031335 regulation of sulfur amino acid metabolic process	2	0.0424175018185564	0.147	0.182	Biological Process	GO:0031335	regulation of sulfur amino acid metabolic process	0.0424175018185564	0.136869838803552	2	11
GO:1900908 regulation of olefin metabolic process	2	0.0424175018185564	0.147	0.182	Biological Process	GO:1900908	regulation of olefin metabolic process	0.0424175018185564	0.136869838803552	2	11
GO:1900911 regulation of olefin biosynthetic process	2	0.0424175018185564	0.147	0.182	Biological Process	GO:1900911	regulation of olefin biosynthetic process	0.0424175018185564	0.136869838803552	2	11
GO:0000904 cell morphogenesis involved in differentiation	5	0.0427146060970165	0.367	0.079	Biological Process	GO:0000904	cell morphogenesis involved in differentiation	0.0427146060970165	0.137221933181156	5	63
GO:0009653 anatomical structure morphogenesis	21	0.0427296108500492	1.542	0.046	Biological Process	GO:0009653	anatomical structure morphogenesis	0.0427296108500492	0.137221933181156	21	458
GO:0010102 lateral root morphogenesis	3	0.0434484904664628	0.22	0.115	Biological Process	GO:0010102	lateral root morphogenesis	0.0434484904664628	0.138543299789287	3	26
GO:0036293 response to decreased oxygen levels	3	0.0434484904664628	0.22	0.115	Biological Process	GO:0036293	response to decreased oxygen levels	0.0434484904664628	0.138543299789287	3	26
GO:0060548 negative regulation of cell death	3	0.0434484904664628	0.22	0.115	Biological Process	GO:0060548	negative regulation of cell death	0.0434484904664628	0.138543299789287	3	26
GO:0048827 phyllome development	10	0.0436809750644302	0.734	0.057	Biological Process	GO:0048827	phyllome development	0.0436809750644302	0.138956890087317	10	176
GO:0009522 photosystem I	8	0.0438576426224465	0.787	0.062	Cellular Component	GO:0009522	photosystem I	0.0438576426224465	0.513760956434373	8	129
GO:0031408 oxylipin biosynthetic process	4	0.0443055270327068	0.294	0.091	Biological Process	GO:0031408	oxylipin biosynthetic process	0.0443055270327068	0.140612846357323	4	44
GO:0006004 fucose metabolic process	6	0.0452022077923873	0.441	0.071	Biological Process	GO:0006004	fucose metabolic process	0.0452022077923873	0.143122681347325	6	85
GO:0016161 beta-amylase activity	3	0.0455964994269981	0.166	0.103	Molecular Function	GO:0016161	beta-amylase activity	0.0455964994269981	0.173390769929877	3	29
GO:0016849 phosphorus-oxygen lyase activity	3	0.0455964994269981	0.166	0.103	Molecular Function	GO:0016849	phosphorus-oxygen lyase activity	0.0455964994269981	0.173390769929877	3	29
GO:0046873 metal ion transmembrane transporter activity	20	0.0463374480347225	1.11	0.042	Molecular Function	GO:0046873	metal ion transmembrane transporter activity	0.0463374480347225	0.175017793590607	20	477
GO:0046903 secretion	12	0.0474603191996901	0.881	0.053	Biological Process	GO:0046903	secretion	0.0474603191996901	0.149636359232459	12	228
GO:0006782 protoporphyrinogen IX biosynthetic process	3	0.0478079199578792	0.22	0.111	Biological Process	GO:0006782	protoporphyrinogen IX biosynthetic process	0.0478079199578792	0.149636359232459	3	27
GO:0046501 protoporphyrinogen IX metabolic process	3	0.0478079199578792	0.22	0.111	Biological Process	GO:0046501	protoporphyrinogen IX metabolic process	0.0478079199578792	0.149636359232459	3	27
GO:0070482 response to oxygen levels	3	0.0478079199578792	0.22	0.111	Biological Process	GO:0070482	response to oxygen levels	0.0478079199578792	0.149636359232459	3	27
GO:0080135 regulation of cellular response to stress	5	0.0478128011748687	0.367	0.077	Biological Process	GO:0080135	regulation of cellular response to stress	0.0478128011748687	0.149636359232459	5	65
GO:0030243 cellulose metabolic process	10	0.0480050937895881	0.734	0.056	Biological Process	GO:0030243	cellulose metabolic process	0.0480050937895881	0.149891193541624	10	179
GO:0010857 calcium-dependent protein kinase activity	2	0.049001398819533	0.111	0.154	Molecular Function	GO:0010857	calcium-dependent protein kinase activity	0.049001398819533	0.183837462685362	2	13
GO:0009832 plant-type cell wall biogenesis	7	0.0491161178649027	0.514	0.064	Biological Process	GO:0009832	plant-type cell wall biogenesis	0.0491161178649027	0.153006892519236	7	109
GO:0004864 protein phosphatase inhibitor activity	4	0.049702947979867	0.222	0.08	Molecular Function	GO:0004864	protein phosphatase inhibitor activity	0.049702947979867	0.185226319471638	4	50
GO:0006020 inositol metabolic process	2	0.049894024833714	0.147	0.167	Biological Process	GO:0006020	inositol metabolic process	0.049894024833714	0.154717251319223	2	12
GO:0051510 regulation of unidimensional cell growth	2	0.049894024833714	0.147	0.167	Biological Process	GO:0051510	regulation of unidimensional cell growth	0.049894024833714	0.154717251319223	2	12
GO:0000978 RNA polymerase II cis-regulatory region sequence-specific DNA binding	7	0.0502345406626495	0.388	0.058	Molecular Function	GO:0000978	RNA polymerase II cis-regulatory region sequence-specific DNA binding	0.0502345406626495	0.185967604174974	7	120
GO:0006525 arginine metabolic process	4	0.0508205567891806	0.294	0.087	Biological Process	GO:0006525	arginine metabolic process	0.0508205567891806	0.156870759769343	4	46
GO:0072583 clathrin-dependent endocytosis	4	0.0508205567891806	0.294	0.087	Biological Process	GO:0072583	clathrin-dependent endocytosis	0.0508205567891806	0.156870759769343	4	46
GO:0045892 negative regulation of transcription, DNA-templated	10	0.051042086113759	0.734	0.055	Biological Process	GO:0045892	negative regulation of transcription, DNA-templated	0.051042086113759	0.157195672951713	10	181
GO:0006116 NADH oxidation	3	0.0523730551857213	0.22	0.107	Biological Process	GO:0006116	NADH oxidation	0.0523730551857213	0.160563198664615	3	28
GO:0009694 jasmonic acid metabolic process	3	0.0523730551857213	0.22	0.107	Biological Process	GO:0009694	jasmonic acid metabolic process	0.0523730551857213	0.160563198664615	3	28
GO:0019212 phosphatase inhibitor activity	4	0.0527955172123474	0.222	0.078	Molecular Function	GO:0019212	phosphatase inhibitor activity	0.0527955172123474	0.194162461326988	4	51
GO:0006898 receptor-mediated endocytosis	4	0.0542639391299282	0.294	0.085	Biological Process	GO:0006898	receptor-mediated endocytosis	0.0542639391299282	0.165983813809192	4	47
GO:0102043 isopentenyl phosphate kinase activity	1	0.0547211614474219	0.055	0.5	Molecular Function	GO:0102043	isopentenyl phosphate kinase activity	0.0547211614474219	0.199928949340581	1	2
GO:0019684 photosynthesis, light reaction	16	0.0558107566504873	1.175	0.047	Biological Process	GO:0019684	photosynthesis, light reaction	0.0558107566504873	0.169631325100423	16	338
GO:1902679 negative regulation of RNA biosynthetic process	10	0.0558327956136747	0.734	0.054	Biological Process	GO:1902679	negative regulation of RNA biosynthetic process	0.0558327956136747	0.169631325100423	10	184
GO:1903507 negative regulation of nucleic acid-templated transcription	10	0.0558327956136747	0.734	0.054	Biological Process	GO:1903507	negative regulation of nucleic acid-templated transcription	0.0558327956136747	0.169631325100423	10	184
GO:0006487 protein N-linked glycosylation	5	0.0561059465996475	0.367	0.074	Biological Process	GO:0006487	protein N-linked glycosylation	0.0561059465996475	0.170079013010591	5	68
GO:0004579 dolichyl-diphosphooligosaccharide-protein glycotransferase activity	2	0.0561397126469193	0.111	0.143	Molecular Function	GO:0004579	dolichyl-diphosphooligosaccharide-protein glycotransferase activity	0.0561397126469193	0.203779866036545	2	14
GO:0006714 sesquiterpenoid metabolic process	3	0.0571399795279815	0.22	0.103	Biological Process	GO:0006714	sesquiterpenoid metabolic process	0.0571399795279815	0.171755473267472	3	29
GO:0010101 post-embryonic root morphogenesis	3	0.0571399795279815	0.22	0.103	Biological Process	GO:0010101	post-embryonic root morphogenesis	0.0571399795279815	0.171755473267472	3	29
GO:0009692 ethylene metabolic process	2	0.0578023227342454	0.147	0.154	Biological Process	GO:0009692	ethylene metabolic process	0.0578023227342454	0.171755473267472	2	13
GO:0009693 ethylene biosynthetic process	2	0.0578023227342454	0.147	0.154	Biological Process	GO:0009693	ethylene biosynthetic process	0.0578023227342454	0.171755473267472	2	13
GO:0043449 cellular alkene metabolic process	2	0.0578023227342454	0.147	0.154	Biological Process	GO:0043449	cellular alkene metabolic process	0.0578023227342454	0.171755473267472	2	13
GO:0043450 alkene biosynthetic process	2	0.0578023227342454	0.147	0.154	Biological Process	GO:0043450	alkene biosynthetic process	0.0578023227342454	0.171755473267472	2	13
GO:0072523 purine-containing compound catabolic process	2	0.0578023227342454	0.147	0.154	Biological Process	GO:0072523	purine-containing compound catabolic process	0.0578023227342454	0.171755473267472	2	13
GO:1900673 olefin metabolic process	2	0.0578023227342454	0.147	0.154	Biological Process	GO:1900673	olefin metabolic process	0.0578023227342454	0.171755473267472	2	13
GO:1900674 olefin biosynthetic process	2	0.0578023227342454	0.147	0.154	Biological Process	GO:1900674	olefin biosynthetic process	0.0578023227342454	0.171755473267472	2	13
GO:0016833 oxo-acid-lyase activity	3	0.0582642932828815	0.166	0.094	Molecular Function	GO:0016833	oxo-acid-lyase activity	0.0582642932828815	0.210127354484715	3	32
GO:0032940 secretion by cell	11	0.0591446663356341	0.808	0.052	Biological Process	GO:0032940	secretion by cell	0.0591446663356341	0.175023905847678	11	211
GO:0010966 regulation of phosphate transport	1	0.05993792041973	0.073	0.5	Biological Process	GO:0010966	regulation of phosphate transport	0.05993792041973	0.175023905847678	1	2
GO:0031540 regulation of anthocyanin biosynthetic process	1	0.05993792041973	0.073	0.5	Biological Process	GO:0031540	regulation of anthocyanin biosynthetic process	0.05993792041973	0.175023905847678	1	2
GO:0032194 ubiquinone biosynthetic process via 3,4-dihydroxy-5-polyprenylbenzoate	1	0.05993792041973	0.073	0.5	Biological Process	GO:0032194	ubiquinone biosynthetic process via 3,4-dihydroxy-5-polyprenylbenzoate	0.05993792041973	0.175023905847678	1	2
GO:1903795 regulation of inorganic anion transmembrane transport	1	0.05993792041973	0.073	0.5	Biological Process	GO:1903795	regulation of inorganic anion transmembrane transport	0.05993792041973	0.175023905847678	1	2
GO:1903959 regulation of anion transmembrane transport	1	0.05993792041973	0.073	0.5	Biological Process	GO:1903959	regulation of anion transmembrane transport	0.05993792041973	0.175023905847678	1	2
GO:2000185 regulation of phosphate transmembrane transport	1	0.05993792041973	0.073	0.5	Biological Process	GO:2000185	regulation of phosphate transmembrane transport	0.05993792041973	0.175023905847678	1	2
GO:2000652 regulation of secondary cell wall biogenesis	1	0.05993792041973	0.073	0.5	Biological Process	GO:2000652	regulation of secondary cell wall biogenesis	0.05993792041973	0.175023905847678	1	2
GO:0009991 response to extracellular stimulus	7	0.0620403266241038	0.514	0.061	Biological Process	GO:0009991	response to extracellular stimulus	0.0620403266241038	0.1793006816988	7	115
GO:0009742 brassinosteroid mediated signaling pathway	5	0.062065620588046	0.367	0.071	Biological Process	GO:0009742	brassinosteroid mediated signaling pathway	0.062065620588046	0.1793006816988	5	70
GO:0043401 steroid hormone mediated signaling pathway	5	0.062065620588046	0.367	0.071	Biological Process	GO:0043401	steroid hormone mediated signaling pathway	0.062065620588046	0.1793006816988	5	70
GO:0048545 response to steroid hormone	5	0.062065620588046	0.367	0.071	Biological Process	GO:0048545	response to steroid hormone	0.062065620588046	0.1793006816988	5	70
GO:0071383 cellular response to steroid hormone stimulus	5	0.062065620588046	0.367	0.071	Biological Process	GO:0071383	cellular response to steroid hormone stimulus	0.062065620588046	0.1793006816988	5	70
GO:0000976 transcription cis-regulatory region binding	16	0.0621369754430498	0.888	0.043	Molecular Function	GO:0000976	transcription cis-regulatory region binding	0.0621369754430498	0.221239294730349	16	376
GO:0001067 transcription regulatory region nucleic acid binding	16	0.0621369754430498	0.888	0.043	Molecular Function	GO:0001067	transcription regulatory region nucleic acid binding	0.0621369754430498	0.221239294730349	16	376
GO:0048518 positive regulation of biological process	37	0.063497168518023	2.717	0.04	Biological Process	GO:0048518	positive regulation of biological process	0.063497168518023	0.183045142508245	37	933
GO:0006875 cellular metal ion homeostasis	7	0.0643776867992778	0.514	0.06	Biological Process	GO:0006875	cellular metal ion homeostasis	0.0643776867992778	0.185188579899199	7	116
GO:0090697 post-embryonic plant organ morphogenesis	4	0.0653288837885242	0.294	0.08	Biological Process	GO:0090697	post-embryonic plant organ morphogenesis	0.0653288837885242	0.187128497631535	4	50
GO:0120252 hydrocarbon metabolic process	4	0.0653288837885242	0.294	0.08	Biological Process	GO:0120252	hydrocarbon metabolic process	0.0653288837885242	0.187128497631535	4	50
GO:1900457 regulation of brassinosteroid mediated signaling pathway	2	0.0661092346937396	0.147	0.143	Biological Process	GO:1900457	regulation of brassinosteroid mediated signaling pathway	0.0661092346937396	0.188963393881471	2	14
GO:0016682 oxidoreductase activity, acting on diphenols and related substances as donors, oxygen as acceptor	7	0.0663789075072032	0.388	0.055	Molecular Function	GO:0016682	oxidoreductase activity, acting on diphenols and related substances as donors, oxygen as acceptor	0.0663789075072032	0.234846894281814	7	128
GO:0005788 endoplasmic reticulum lumen	3	0.0672455972312297	0.295	0.097	Cellular Component	GO:0005788	endoplasmic reticulum lumen	0.0672455972312297	0.605094458491121	3	31
GO:0035670 plant-type ovary development	3	0.0672618863609551	0.22	0.097	Biological Process	GO:0035670	plant-type ovary development	0.0672618863609551	0.191448569178971	3	31
GO:0048481 plant ovule development	3	0.0672618863609551	0.22	0.097	Biological Process	GO:0048481	plant ovule development	0.0672618863609551	0.191448569178971	3	31
GO:0010118 stomatal movement	4	0.069258809829131	0.294	0.078	Biological Process	GO:0010118	stomatal movement	0.069258809829131	0.196718300186944	4	51
GO:1990837 sequence-specific double-stranded DNA binding	16	0.0705996609441402	0.888	0.042	Molecular Function	GO:1990837	sequence-specific double-stranded DNA binding	0.0705996609441402	0.248208870866506	16	383
GO:0045934 negative regulation of nucleobase-containing compound metabolic process	11	0.0709983059957159	0.808	0.05	Biological Process	GO:0045934	negative regulation of nucleobase-containing compound metabolic process	0.0709983059957159	0.20123628869226	11	218
GO:0016661 oxidoreductase activity, acting on other nitrogenous compounds as donors	2	0.0714002306381154	0.111	0.125	Molecular Function	GO:0016661	oxidoreductase activity, acting on other nitrogenous compounds as donors	0.0714002306381154	0.249454555791916	2	16
GO:0071367 cellular response to brassinosteroid stimulus	5	0.0716480398370141	0.367	0.068	Biological Process	GO:0071367	cellular response to brassinosteroid stimulus	0.0716480398370141	0.202393472116285	5	73
GO:0071805 potassium ion transmembrane transport	7	0.0717059712601337	0.514	0.059	Biological Process	GO:0071805	potassium ion transmembrane transport	0.0717059712601337	0.202393472116285	7	119
GO:0006979 response to oxidative stress	36	0.0723699812012091	2.643	0.039	Biological Process	GO:0006979	response to oxidative stress	0.0723699812012091	0.203842113716739	36	915
GO:0019904 protein domain specific binding	3	0.0723968831645644	0.166	0.086	Molecular Function	GO:0019904	protein domain specific binding	0.0723968831645644	0.251365575708022	3	35
GO:0031225 anchored component of membrane	4	0.0732765554647369	0.393	0.077	Cellular Component	GO:0031225	anchored component of membrane	0.0732765554647369	0.605094458491121	4	52
GO:0000786 nucleosome	25	0.0743209472195236	2.458	0.042	Cellular Component	GO:0000786	nucleosome	0.0743209472195236	0.605094458491121	25	602
GO:0016462 pyrophosphatase activity	54	0.0765821702716111	2.997	0.034	Molecular Function	GO:0016462	pyrophosphatase activity	0.0765821702716111	0.262229170724671	54	1590
GO:0004402 histone acetyltransferase activity	4	0.0772665171976421	0.222	0.069	Molecular Function	GO:0004402	histone acetyltransferase activity	0.0772665171976421	0.262229170724671	4	58
GO:0003872 6-phosphofructokinase activity	3	0.0774166570674425	0.166	0.083	Molecular Function	GO:0003872	6-phosphofructokinase activity	0.0774166570674425	0.262229170724671	3	36
GO:0005975 carbohydrate metabolic process	99	0.0781213894014336	7.269	0.035	Biological Process	GO:0005975	carbohydrate metabolic process	0.0781213894014336	0.218716707884706	99	2821
GO:0006874 cellular calcium ion homeostasis	3	0.0781362203463853	0.22	0.091	Biological Process	GO:0006874	cellular calcium ion homeostasis	0.0781362203463853	0.218716707884706	3	33
GO:0055074 calcium ion homeostasis	3	0.0781362203463853	0.22	0.091	Biological Process	GO:0055074	calcium ion homeostasis	0.0781362203463853	0.218716707884706	3	33
GO:0099402 plant organ development	25	0.0792006349585763	1.836	0.041	Biological Process	GO:0099402	plant organ development	0.0792006349585763	0.221238137322304	25	606
GO:0016818 hydrolase activity, acting on acid anhydrides, in phosphorus-containing anhydrides	55	0.0799731940175005	3.052	0.034	Molecular Function	GO:0016818	hydrolase activity, acting on acid anhydrides, in phosphorus-containing anhydrides	0.0799731940175005	0.262229170724671	55	1628
GO:0004357 glutamate-cysteine ligase activity	1	0.0809489886742217	0.055	0.333	Molecular Function	GO:0004357	glutamate-cysteine ligase activity	0.0809489886742217	0.262229170724671	1	3
GO:0008898 S-adenosylmethionine-homocysteine S-methyltransferase activity	1	0.0809489886742217	0.055	0.333	Molecular Function	GO:0008898	S-adenosylmethionine-homocysteine S-methyltransferase activity	0.0809489886742217	0.262229170724671	1	3
GO:0010295 (+)-abscisic acid 8'-hydroxylase activity	1	0.0809489886742217	0.055	0.333	Molecular Function	GO:0010295	(+)-abscisic acid 8'-hydroxylase activity	0.0809489886742217	0.262229170724671	1	3
GO:0010331 gibberellin binding	1	0.0809489886742217	0.055	0.333	Molecular Function	GO:0010331	gibberellin binding	0.0809489886742217	0.262229170724671	1	3
GO:0036033 mediator complex binding	1	0.0809489886742217	0.055	0.333	Molecular Function	GO:0036033	mediator complex binding	0.0809489886742217	0.262229170724671	1	3
GO:0046608 carotenoid isomerase activity	1	0.0809489886742217	0.055	0.333	Molecular Function	GO:0046608	carotenoid isomerase activity	0.0809489886742217	0.262229170724671	1	3
GO:0016758 hexosyltransferase activity	50	0.0810360889625311	2.775	0.034	Molecular Function	GO:0016758	hexosyltransferase activity	0.0810360889625311	0.262229170724671	50	1466
GO:0061733 peptide-lysine-N-acetyltransferase activity	4	0.0811550027466334	0.222	0.068	Molecular Function	GO:0061733	peptide-lysine-N-acetyltransferase activity	0.0811550027466334	0.262229170724671	4	59
GO:0016052 carbohydrate catabolic process	21	0.0812532581024333	1.542	0.042	Biological Process	GO:0016052	carbohydrate catabolic process	0.0812532581024333	0.226503927741216	21	495
GO:0071669 plant-type cell wall organization or biogenesis	12	0.0819162921852311	0.881	0.048	Biological Process	GO:0071669	plant-type cell wall organization or biogenesis	0.0819162921852311	0.227721240350448	12	250
GO:0048589 developmental growth	10	0.0820268077297843	0.734	0.051	Biological Process	GO:0048589	developmental growth	0.0820268077297843	0.227721240350448	10	198
GO:0006527 arginine catabolic process	2	0.0837942691105005	0.147	0.125	Biological Process	GO:0006527	arginine catabolic process	0.0837942691105005	0.230866513495345	2	16
GO:0140352 export from cell	20	0.0838030660038795	1.468	0.043	Biological Process	GO:0140352	export from cell	0.0838030660038795	0.230866513495345	20	469
GO:0006734 NADH metabolic process	3	0.083842794472052	0.22	0.088	Biological Process	GO:0006734	NADH metabolic process	0.083842794472052	0.230866513495345	3	34
GO:0009095 aromatic amino acid family biosynthetic process, prephenate pathway	3	0.083842794472052	0.22	0.088	Biological Process	GO:0009095	aromatic amino acid family biosynthetic process, prephenate pathway	0.083842794472052	0.230866513495345	3	34
GO:0016817 hydrolase activity, acting on acid anhydrides	55	0.0853123563834016	3.052	0.034	Molecular Function	GO:0016817	hydrolase activity, acting on acid anhydrides	0.0853123563834016	0.274078202404146	55	1636
GO:0044815 DNA packaging complex	25	0.0868966132557602	2.458	0.041	Cellular Component	GO:0044815	DNA packaging complex	0.0868966132557602	0.605094458491121	25	613
GO:0004861 cyclin-dependent protein serine/threonine kinase inhibitor activity	2	0.0878171730597612	0.111	0.111	Molecular Function	GO:0004861	cyclin-dependent protein serine/threonine kinase inhibitor activity	0.0878171730597612	0.280513141373752	2	18
GO:0005615 extracellular space	11	0.0881594918999605	1.082	0.048	Cellular Component	GO:0005615	extracellular space	0.0881594918999605	0.605094458491121	11	227
GO:0002215 defense response to nematode	1	0.0885468615733328	0.073	0.333	Biological Process	GO:0002215	defense response to nematode	0.0885468615733328	0.232457003586691	1	3
GO:0010325 raffinose family oligosaccharide biosynthetic process	1	0.0885468615733328	0.073	0.333	Biological Process	GO:0010325	raffinose family oligosaccharide biosynthetic process	0.0885468615733328	0.232457003586691	1	3
GO:0010618 aerenchyma formation	1	0.0885468615733328	0.073	0.333	Biological Process	GO:0010618	aerenchyma formation	0.0885468615733328	0.232457003586691	1	3
GO:0032069 regulation of nuclease activity	1	0.0885468615733328	0.073	0.333	Biological Process	GO:0032069	regulation of nuclease activity	0.0885468615733328	0.232457003586691	1	3
GO:0032074 negative regulation of nuclease activity	1	0.0885468615733328	0.073	0.333	Biological Process	GO:0032074	negative regulation of nuclease activity	0.0885468615733328	0.232457003586691	1	3
GO:0050829 defense response to Gram-negative bacterium	1	0.0885468615733328	0.073	0.333	Biological Process	GO:0050829	defense response to Gram-negative bacterium	0.0885468615733328	0.232457003586691	1	3
GO:0052318 regulation of phytoalexin metabolic process	1	0.0885468615733328	0.073	0.333	Biological Process	GO:0052318	regulation of phytoalexin metabolic process	0.0885468615733328	0.232457003586691	1	3
GO:0052319 regulation of phytoalexin biosynthetic process	1	0.0885468615733328	0.073	0.333	Biological Process	GO:0052319	regulation of phytoalexin biosynthetic process	0.0885468615733328	0.232457003586691	1	3
GO:0052320 positive regulation of phytoalexin metabolic process	1	0.0885468615733328	0.073	0.333	Biological Process	GO:0052320	positive regulation of phytoalexin metabolic process	0.0885468615733328	0.232457003586691	1	3
GO:0052322 positive regulation of phytoalexin biosynthetic process	1	0.0885468615733328	0.073	0.333	Biological Process	GO:0052322	positive regulation of phytoalexin biosynthetic process	0.0885468615733328	0.232457003586691	1	3
GO:0060700 regulation of ribonuclease activity	1	0.0885468615733328	0.073	0.333	Biological Process	GO:0060700	regulation of ribonuclease activity	0.0885468615733328	0.232457003586691	1	3
GO:0060701 negative regulation of ribonuclease activity	1	0.0885468615733328	0.073	0.333	Biological Process	GO:0060701	negative regulation of ribonuclease activity	0.0885468615733328	0.232457003586691	1	3
GO:0060866 leaf abscission	1	0.0885468615733328	0.073	0.333	Biological Process	GO:0060866	leaf abscission	0.0885468615733328	0.232457003586691	1	3
GO:0071327 cellular response to trehalose stimulus	1	0.0885468615733328	0.073	0.333	Biological Process	GO:0071327	cellular response to trehalose stimulus	0.0885468615733328	0.232457003586691	1	3
GO:0080151 positive regulation of salicylic acid mediated signaling pathway	1	0.0885468615733328	0.073	0.333	Biological Process	GO:0080151	positive regulation of salicylic acid mediated signaling pathway	0.0885468615733328	0.232457003586691	1	3
GO:1900378 positive regulation of secondary metabolite biosynthetic process	1	0.0885468615733328	0.073	0.333	Biological Process	GO:1900378	positive regulation of secondary metabolite biosynthetic process	0.0885468615733328	0.232457003586691	1	3
GO:1901182 regulation of camalexin biosynthetic process	1	0.0885468615733328	0.073	0.333	Biological Process	GO:1901182	regulation of camalexin biosynthetic process	0.0885468615733328	0.232457003586691	1	3
GO:1901183 positive regulation of camalexin biosynthetic process	1	0.0885468615733328	0.073	0.333	Biological Process	GO:1901183	positive regulation of camalexin biosynthetic process	0.0885468615733328	0.232457003586691	1	3
GO:1901535 regulation of DNA demethylation	1	0.0885468615733328	0.073	0.333	Biological Process	GO:1901535	regulation of DNA demethylation	0.0885468615733328	0.232457003586691	1	3
GO:1901917 regulation of exoribonuclease activity	1	0.0885468615733328	0.073	0.333	Biological Process	GO:1901917	regulation of exoribonuclease activity	0.0885468615733328	0.232457003586691	1	3
GO:1901918 negative regulation of exoribonuclease activity	1	0.0885468615733328	0.073	0.333	Biological Process	GO:1901918	negative regulation of exoribonuclease activity	0.0885468615733328	0.232457003586691	1	3
GO:1905777 regulation of exonuclease activity	1	0.0885468615733328	0.073	0.333	Biological Process	GO:1905777	regulation of exonuclease activity	0.0885468615733328	0.232457003586691	1	3
GO:1905778 negative regulation of exonuclease activity	1	0.0885468615733328	0.073	0.333	Biological Process	GO:1905778	negative regulation of exonuclease activity	0.0885468615733328	0.232457003586691	1	3
GO:2000069 regulation of post-embryonic root development	1	0.0885468615733328	0.073	0.333	Biological Process	GO:2000069	regulation of post-embryonic root development	0.0885468615733328	0.232457003586691	1	3
GO:0030427 site of polarized growth	1	0.0885504085596762	0.098	0.333	Cellular Component	GO:0030427	site of polarized growth	0.0885504085596762	0.605094458491121	1	3
GO:0035838 growing cell tip	1	0.0885504085596762	0.098	0.333	Cellular Component	GO:0035838	growing cell tip	0.0885504085596762	0.605094458491121	1	3
GO:0051286 cell tip	1	0.0885504085596762	0.098	0.333	Cellular Component	GO:0051286	cell tip	0.0885504085596762	0.605094458491121	1	3
GO:0060187 cell pole	1	0.0885504085596762	0.098	0.333	Cellular Component	GO:0060187	cell pole	0.0885504085596762	0.605094458491121	1	3
GO:0090404 pollen tube tip	1	0.0885504085596762	0.098	0.333	Cellular Component	GO:0090404	pollen tube tip	0.0885504085596762	0.605094458491121	1	3
GO:0072507 divalent inorganic cation homeostasis	4	0.0906598700855187	0.294	0.071	Biological Process	GO:0072507	divalent inorganic cation homeostasis	0.0906598700855187	0.237542915417871	4	56
GO:0048468 cell development	6	0.0913626544573894	0.441	0.059	Biological Process	GO:0048468	cell development	0.0913626544573894	0.238921293668067	6	102
GO:0006873 cellular ion homeostasis	9	0.0925801460364492	0.661	0.051	Biological Process	GO:0006873	cellular ion homeostasis	0.0925801460364492	0.241637755678145	9	177
GO:0016125 sterol metabolic process	5	0.0930839295506697	0.367	0.063	Biological Process	GO:0016125	sterol metabolic process	0.0930839295506697	0.242096092157769	5	79
GO:0016119 carotene metabolic process	2	0.0931138815991419	0.147	0.118	Biological Process	GO:0016119	carotene metabolic process	0.0931138815991419	0.242096092157769	2	17
GO:0000977 RNA polymerase II transcription regulatory region sequence-specific DNA binding	11	0.0945306374560218	0.61	0.044	Molecular Function	GO:0000977	RNA polymerase II transcription regulatory region sequence-specific DNA binding	0.0945306374560218	0.300242195101797	11	252
GO:0035966 response to topologically incorrect protein	3	0.0957675903389754	0.22	0.083	Biological Process	GO:0035966	response to topologically incorrect protein	0.0957675903389754	0.247567461067485	3	36
GO:0035967 cellular response to topologically incorrect protein	3	0.0957675903389754	0.22	0.083	Biological Process	GO:0035967	cellular response to topologically incorrect protein	0.0957675903389754	0.247567461067485	3	36
GO:0070534 protein K63-linked ubiquitination	3	0.0957675903389754	0.22	0.083	Biological Process	GO:0070534	protein K63-linked ubiquitination	0.0957675903389754	0.247567461067485	3	36
GO:0004470 malic enzyme activity	2	0.0964049079576361	0.111	0.105	Molecular Function	GO:0004470	malic enzyme activity	0.0964049079576361	0.301063371778316	2	19
GO:0004471 malate dehydrogenase (decarboxylating) (NAD+) activity	2	0.0964049079576361	0.111	0.105	Molecular Function	GO:0004471	malate dehydrogenase (decarboxylating) (NAD+) activity	0.0964049079576361	0.301063371778316	2	19
GO:0032454 histone H3-methyl-lysine-9 demethylase activity	2	0.0964049079576361	0.111	0.105	Molecular Function	GO:0032454	histone H3-methyl-lysine-9 demethylase activity	0.0964049079576361	0.301063371778316	2	19
GO:0009642 response to light intensity	5	0.0969433869842532	0.367	0.062	Biological Process	GO:0009642	response to light intensity	0.0969433869842532	0.25012873893647	5	80
GO:0046483 heterocycle metabolic process	322	0.101765875052824	23.642	0.032	Biological Process	GO:0046483	heterocycle metabolic process	0.101765875052824	0.261035013425702	322	9932
GO:0032993 protein-DNA complex	25	0.102148837030162	2.458	0.04	Cellular Component	GO:0032993	protein-DNA complex	0.102148837030162	0.645578625299586	25	625
GO:0000785 chromatin	27	0.102347830840178	2.655	0.04	Cellular Component	GO:0000785	chromatin	0.102347830840178	0.645578625299586	27	683
GO:0009664 plant-type cell wall organization	9	0.102613408148589	0.661	0.05	Biological Process	GO:0009664	plant-type cell wall organization	0.102613408148589	0.261035013425702	9	181
GO:0010431 seed maturation	2	0.102714960904196	0.147	0.111	Biological Process	GO:0010431	seed maturation	0.102714960904196	0.261035013425702	2	18
GO:0042126 nitrate metabolic process	2	0.102714960904196	0.147	0.111	Biological Process	GO:0042126	nitrate metabolic process	0.102714960904196	0.261035013425702	2	18
GO:0042128 nitrate assimilation	2	0.102714960904196	0.147	0.111	Biological Process	GO:0042128	nitrate assimilation	0.102714960904196	0.261035013425702	2	18
GO:0055070 copper ion homeostasis	2	0.102714960904196	0.147	0.111	Biological Process	GO:0055070	copper ion homeostasis	0.102714960904196	0.261035013425702	2	18
GO:0055075 potassium ion homeostasis	2	0.102714960904196	0.147	0.111	Biological Process	GO:0055075	potassium ion homeostasis	0.102714960904196	0.261035013425702	2	18
GO:2001057 reactive nitrogen species metabolic process	2	0.102714960904196	0.147	0.111	Biological Process	GO:2001057	reactive nitrogen species metabolic process	0.102714960904196	0.261035013425702	2	18
GO:0030838 positive regulation of actin filament polymerization	4	0.104839805313349	0.294	0.068	Biological Process	GO:0030838	positive regulation of actin filament polymerization	0.104839805313349	0.264940965950744	4	59
GO:0032273 positive regulation of protein polymerization	4	0.104839805313349	0.294	0.068	Biological Process	GO:0032273	positive regulation of protein polymerization	0.104839805313349	0.264940965950744	4	59
GO:0045010 actin nucleation	4	0.104839805313349	0.294	0.068	Biological Process	GO:0045010	actin nucleation	0.104839805313349	0.264940965950744	4	59
GO:0030276 clathrin binding	4	0.106427478214942	0.222	0.062	Molecular Function	GO:0030276	clathrin binding	0.106427478214942	0.328758363191951	4	65
GO:0052691 UDP-arabinopyranose mutase activity	1	0.106449487902939	0.055	0.25	Molecular Function	GO:0052691	UDP-arabinopyranose mutase activity	0.106449487902939	0.328758363191951	1	4
GO:0000902 cell morphogenesis	7	0.108904070993891	0.514	0.053	Biological Process	GO:0000902	cell morphogenesis	0.108904070993891	0.274698328327874	7	132
GO:0005484 SNAP receptor activity	5	0.109186219475187	0.277	0.055	Molecular Function	GO:0005484	SNAP receptor activity	0.109186219475187	0.33434241249282	5	91
GO:0009826 unidimensional cell growth	4	0.10977776429044	0.294	0.067	Biological Process	GO:0009826	unidimensional cell growth	0.10977776429044	0.275360922672865	4	60
GO:0051495 positive regulation of cytoskeleton organization	4	0.10977776429044	0.294	0.067	Biological Process	GO:0051495	positive regulation of cytoskeleton organization	0.10977776429044	0.275360922672865	4	60
GO:1902905 positive regulation of supramolecular fiber organization	4	0.10977776429044	0.294	0.067	Biological Process	GO:1902905	positive regulation of supramolecular fiber organization	0.10977776429044	0.275360922672865	4	60
GO:0008443 phosphofructokinase activity	3	0.110496366108243	0.166	0.071	Molecular Function	GO:0008443	phosphofructokinase activity	0.110496366108243	0.33434241249282	3	42
GO:0016774 phosphotransferase activity, carboxyl group as acceptor	3	0.110496366108243	0.166	0.071	Molecular Function	GO:0016774	phosphotransferase activity, carboxyl group as acceptor	0.110496366108243	0.33434241249282	3	42
GO:0008152 metabolic process	964	0.111311053603507	70.778	0.031	Biological Process	GO:0008152	metabolic process	0.111311053603507	0.278689897170263	964	30990
GO:0003824 catalytic activity	916	0.11188451872182	50.832	0.029	Molecular Function	GO:0003824	catalytic activity	0.11188451872182	0.33434241249282	916	32079
GO:0006995 cellular response to nitrogen starvation	2	0.11257177577891	0.147	0.105	Biological Process	GO:0006995	cellular response to nitrogen starvation	0.11257177577891	0.279773972156408	2	19
GO:0007143 female meiotic nuclear division	2	0.11257177577891	0.147	0.105	Biological Process	GO:0007143	female meiotic nuclear division	0.11257177577891	0.279773972156408	2	19
GO:0007292 female gamete generation	2	0.11257177577891	0.147	0.105	Biological Process	GO:0007292	female gamete generation	0.11257177577891	0.279773972156408	2	19
GO:0009860 pollen tube growth	2	0.11257177577891	0.147	0.105	Biological Process	GO:0009860	pollen tube growth	0.11257177577891	0.279773972156408	2	19
GO:0016830 carbon-carbon lyase activity	14	0.113552387171952	0.777	0.04	Molecular Function	GO:0016830	carbon-carbon lyase activity	0.113552387171952	0.33434241249282	14	351
GO:0004311 farnesyltranstransferase activity	2	0.11423864183565	0.111	0.095	Molecular Function	GO:0004311	farnesyltranstransferase activity	0.11423864183565	0.33434241249282	2	21
GO:0004576 oligosaccharyl transferase activity	2	0.11423864183565	0.111	0.095	Molecular Function	GO:0004576	oligosaccharyl transferase activity	0.11423864183565	0.33434241249282	2	21
GO:0004860 protein kinase inhibitor activity	2	0.11423864183565	0.111	0.095	Molecular Function	GO:0004860	protein kinase inhibitor activity	0.11423864183565	0.33434241249282	2	21
GO:0030151 molybdenum ion binding	2	0.11423864183565	0.111	0.095	Molecular Function	GO:0030151	molybdenum ion binding	0.11423864183565	0.33434241249282	2	21
GO:0030291 protein serine/threonine kinase inhibitor activity	2	0.11423864183565	0.111	0.095	Molecular Function	GO:0030291	protein serine/threonine kinase inhibitor activity	0.11423864183565	0.33434241249282	2	21
GO:0031334 positive regulation of protein-containing complex assembly	4	0.114817689354949	0.294	0.066	Biological Process	GO:0031334	positive regulation of protein-containing complex assembly	0.114817689354949	0.284386108655523	4	61
GO:0072503 cellular divalent inorganic cation homeostasis	3	0.114848236187807	0.22	0.077	Biological Process	GO:0072503	cellular divalent inorganic cation homeostasis	0.114848236187807	0.284386108655523	3	39
GO:0009662 etioplast organization	1	0.116285765658805	0.073	0.25	Biological Process	GO:0009662	etioplast organization	0.116285765658805	0.284815860816493	1	4
GO:0009683 indoleacetic acid metabolic process	1	0.116285765658805	0.073	0.25	Biological Process	GO:0009683	indoleacetic acid metabolic process	0.116285765658805	0.284815860816493	1	4
GO:0009684 indoleacetic acid biosynthetic process	1	0.116285765658805	0.073	0.25	Biological Process	GO:0009684	indoleacetic acid biosynthetic process	0.116285765658805	0.284815860816493	1	4
GO:0009962 regulation of flavonoid biosynthetic process	1	0.116285765658805	0.073	0.25	Biological Process	GO:0009962	regulation of flavonoid biosynthetic process	0.116285765658805	0.284815860816493	1	4
GO:0033356 UDP-L-arabinose metabolic process	1	0.116285765658805	0.073	0.25	Biological Process	GO:0033356	UDP-L-arabinose metabolic process	0.116285765658805	0.284815860816493	1	4
GO:0051176 positive regulation of sulfur metabolic process	1	0.116285765658805	0.073	0.25	Biological Process	GO:0051176	positive regulation of sulfur metabolic process	0.116285765658805	0.284815860816493	1	4
GO:0099023 vesicle tethering complex	11	0.117350646583197	1.082	0.046	Cellular Component	GO:0099023	vesicle tethering complex	0.117350646583197	0.712796519986827	11	240
GO:0019829 ATPase-coupled cation transmembrane transporter activity	8	0.118192837644404	0.444	0.045	Molecular Function	GO:0019829	ATPase-coupled cation transmembrane transporter activity	0.118192837644404	0.344113522100113	8	176
GO:0006952 defense response	112	0.11938723658795	8.223	0.034	Biological Process	GO:0006952	defense response	0.11938723658795	0.291883442797302	112	3295
GO:0044089 positive regulation of cellular component biogenesis	4	0.119957247966288	0.294	0.065	Biological Process	GO:0044089	positive regulation of cellular component biogenesis	0.119957247966288	0.292747652076573	4	62
GO:0019674 NAD metabolic process	3	0.121503170949398	0.22	0.075	Biological Process	GO:0019674	NAD metabolic process	0.121503170949398	0.2954537538194	3	40
GO:0046777 protein autophosphorylation	3	0.121503170949398	0.22	0.075	Biological Process	GO:0046777	protein autophosphorylation	0.121503170949398	0.2954537538194	3	40
GO:0016679 oxidoreductase activity, acting on diphenols and related substances as donors	7	0.121930859873333	0.388	0.047	Molecular Function	GO:0016679	oxidoreductase activity, acting on diphenols and related substances as donors	0.121930859873333	0.353157257353333	7	149
GO:0008278 cohesin complex	2	0.122656094184565	0.197	0.1	Cellular Component	GO:0008278	cohesin complex	0.122656094184565	0.718414265938166	2	20
GO:0008216 spermidine metabolic process	2	0.122659898359012	0.147	0.1	Biological Process	GO:0008216	spermidine metabolic process	0.122659898359012	0.296665800682261	2	20
GO:0008295 spermidine biosynthetic process	2	0.122659898359012	0.147	0.1	Biological Process	GO:0008295	spermidine biosynthetic process	0.122659898359012	0.296665800682261	2	20
GO:0009932 cell tip growth	2	0.122659898359012	0.147	0.1	Biological Process	GO:0009932	cell tip growth	0.122659898359012	0.296665800682261	2	20
GO:0004535 poly(A)-specific ribonuclease activity	2	0.123447280540874	0.111	0.091	Molecular Function	GO:0004535	poly(A)-specific ribonuclease activity	0.123447280540874	0.355706339290457	2	22
GO:0030003 cellular cation homeostasis	7	0.125498372842418	0.514	0.051	Biological Process	GO:0030003	cellular cation homeostasis	0.125498372842418	0.302988928719552	7	137
GO:0006139 nucleobase-containing compound metabolic process	301	0.126733790156167	22.1	0.032	Biological Process	GO:0006139	nucleobase-containing compound metabolic process	0.126733790156167	0.305426175207019	301	9320
GO:0006002 fructose 6-phosphate metabolic process	3	0.128295464923021	0.22	0.073	Biological Process	GO:0006002	fructose 6-phosphate metabolic process	0.128295464923021	0.307000829337919	3	41
GO:0009787 regulation of abscisic acid-activated signaling pathway	3	0.128295464923021	0.22	0.073	Biological Process	GO:0009787	regulation of abscisic acid-activated signaling pathway	0.128295464923021	0.307000829337919	3	41
GO:1901419 regulation of response to alcohol	3	0.128295464923021	0.22	0.073	Biological Process	GO:1901419	regulation of response to alcohol	0.128295464923021	0.307000829337919	3	41
GO:1905957 regulation of cellular response to alcohol	3	0.128295464923021	0.22	0.073	Biological Process	GO:1905957	regulation of cellular response to alcohol	0.128295464923021	0.307000829337919	3	41
GO:0016717 oxidoreductase activity, acting on paired donors, with oxidation of a pair of donors resulting in the reduction of molecular oxygen to two molecules of water	4	0.129858072050533	0.222	0.057	Molecular Function	GO:0016717	oxidoreductase activity, acting on paired donors, with oxidation of a pair of donors resulting in the reduction of molecular oxygen to two molecules of water	0.129858072050533	0.372259806544861	4	70
GO:0005985 sucrose metabolic process	4	0.13052558976135	0.294	0.062	Biological Process	GO:0005985	sucrose metabolic process	0.13052558976135	0.311785507698489	4	64
GO:0004633 phosphopantothenoylcysteine decarboxylase activity	1	0.131242817891836	0.055	0.2	Molecular Function	GO:0004633	phosphopantothenoylcysteine decarboxylase activity	0.131242817891836	0.372409823358052	1	5
GO:0035529 NADH pyrophosphatase activity	1	0.131242817891836	0.055	0.2	Molecular Function	GO:0035529	NADH pyrophosphatase activity	0.131242817891836	0.372409823358052	1	5
GO:0004097 catechol oxidase activity	2	0.132826969646223	0.111	0.087	Molecular Function	GO:0004097	catechol oxidase activity	0.132826969646223	0.375001394102216	2	23
GO:0071941 nitrogen cycle metabolic process	2	0.132956148759831	0.147	0.095	Biological Process	GO:0071941	nitrogen cycle metabolic process	0.132956148759831	0.317031240076352	2	21
GO:0051273 beta-glucan metabolic process	10	0.133342684482334	0.734	0.046	Biological Process	GO:0051273	beta-glucan metabolic process	0.133342684482334	0.317393150387528	10	219
GO:0010090 trichome morphogenesis	3	0.135219060572009	0.22	0.071	Biological Process	GO:0010090	trichome morphogenesis	0.135219060572009	0.321293795946145	3	42
GO:0009741 response to brassinosteroid	5	0.139746196467385	0.367	0.056	Biological Process	GO:0009741	response to brassinosteroid	0.139746196467385	0.330936704027566	5	90
GO:0044347 cell wall polysaccharide catabolic process	3	0.142267884515963	0.22	0.07	Biological Process	GO:0044347	cell wall polysaccharide catabolic process	0.142267884515963	0.330936704027566	3	43
GO:0045493 xylan catabolic process	3	0.142267884515963	0.22	0.07	Biological Process	GO:0045493	xylan catabolic process	0.142267884515963	0.330936704027566	3	43
GO:0003950 NAD+ ADP-ribosyltransferase activity	2	0.14236114272693	0.111	0.083	Molecular Function	GO:0003950	NAD+ ADP-ribosyltransferase activity	0.14236114272693	0.39789939392177	2	24
GO:0004143 diacylglycerol kinase activity	2	0.14236114272693	0.111	0.083	Molecular Function	GO:0004143	diacylglycerol kinase activity	0.14236114272693	0.39789939392177	2	24
GO:0009851 auxin biosynthetic process	1	0.143181072844466	0.073	0.2	Biological Process	GO:0009851	auxin biosynthetic process	0.143181072844466	0.330936704027566	1	5
GO:0032104 regulation of response to extracellular stimulus	1	0.143181072844466	0.073	0.2	Biological Process	GO:0032104	regulation of response to extracellular stimulus	0.143181072844466	0.330936704027566	1	5
GO:0032106 positive regulation of response to extracellular stimulus	1	0.143181072844466	0.073	0.2	Biological Process	GO:0032106	positive regulation of response to extracellular stimulus	0.143181072844466	0.330936704027566	1	5
GO:0032107 regulation of response to nutrient levels	1	0.143181072844466	0.073	0.2	Biological Process	GO:0032107	regulation of response to nutrient levels	0.143181072844466	0.330936704027566	1	5
GO:0032109 positive regulation of response to nutrient levels	1	0.143181072844466	0.073	0.2	Biological Process	GO:0032109	positive regulation of response to nutrient levels	0.143181072844466	0.330936704027566	1	5
GO:0044070 regulation of anion transport	1	0.143181072844466	0.073	0.2	Biological Process	GO:0044070	regulation of anion transport	0.143181072844466	0.330936704027566	1	5
GO:0080040 positive regulation of cellular response to phosphate starvation	1	0.143181072844466	0.073	0.2	Biological Process	GO:0080040	positive regulation of cellular response to phosphate starvation	0.143181072844466	0.330936704027566	1	5
GO:0090708 specification of plant organ axis polarity	1	0.143181072844466	0.073	0.2	Biological Process	GO:0090708	specification of plant organ axis polarity	0.143181072844466	0.330936704027566	1	5
GO:0140255 regulation of cellular response to phosphate starvation	1	0.143181072844466	0.073	0.2	Biological Process	GO:0140255	regulation of cellular response to phosphate starvation	0.143181072844466	0.330936704027566	1	5
GO:1903338 regulation of cell wall organization or biogenesis	1	0.143181072844466	0.073	0.2	Biological Process	GO:1903338	regulation of cell wall organization or biogenesis	0.143181072844466	0.330936704027566	1	5
GO:2000067 regulation of root morphogenesis	1	0.143181072844466	0.073	0.2	Biological Process	GO:2000067	regulation of root morphogenesis	0.143181072844466	0.330936704027566	1	5
GO:0034098 VCP-NPL4-UFD1 AAA ATPase complex	1	0.143187649815074	0.098	0.2	Cellular Component	GO:0034098	VCP-NPL4-UFD1 AAA ATPase complex	0.143187649815074	0.789588602605828	1	5
GO:0008300 isoprenoid catabolic process	2	0.143438541834433	0.147	0.091	Biological Process	GO:0008300	isoprenoid catabolic process	0.143438541834433	0.330936704027566	2	22
GO:0060919 auxin influx	2	0.143438541834433	0.147	0.091	Biological Process	GO:0060919	auxin influx	0.143438541834433	0.330936704027566	2	22
GO:0080162 intracellular auxin transport	2	0.143438541834433	0.147	0.091	Biological Process	GO:0080162	intracellular auxin transport	0.143438541834433	0.330936704027566	2	22
GO:0042594 response to starvation	5	0.144421001222243	0.367	0.055	Biological Process	GO:0042594	response to starvation	0.144421001222243	0.332635764314264	5	91
GO:0031224 intrinsic component of membrane	447	0.144436939501066	43.953	0.032	Cellular Component	GO:0031224	intrinsic component of membrane	0.144436939501066	0.789588602605828	447	14131
GO:0034212 peptide N-acetyltransferase activity	4	0.144851348712505	0.222	0.055	Molecular Function	GO:0034212	peptide N-acetyltransferase activity	0.144851348712505	0.402845293185525	4	73
GO:0048440 carpel development	3	0.149435861892787	0.22	0.068	Biological Process	GO:0048440	carpel development	0.149435861892787	0.343017462273426	3	44
GO:0048467 gynoecium development	3	0.149435861892787	0.22	0.068	Biological Process	GO:0048467	gynoecium development	0.149435861892787	0.343017462273426	3	44
GO:0035250 UDP-galactosyltransferase activity	2	0.152034020042425	0.111	0.08	Molecular Function	GO:0035250	UDP-galactosyltransferase activity	0.152034020042425	0.413523122134223	2	25
GO:0043484 regulation of RNA splicing	2	0.154086236012709	0.147	0.087	Biological Process	GO:0043484	regulation of RNA splicing	0.154086236012709	0.353092527269801	2	23
GO:0008378 galactosyltransferase activity	5	0.154257309251425	0.277	0.049	Molecular Function	GO:0008378	galactosyltransferase activity	0.154257309251425	0.413523122134223	5	102
GO:0004439 phosphatidylinositol-4,5-bisphosphate 5-phosphatase activity	1	0.155348578977079	0.055	0.167	Molecular Function	GO:0004439	phosphatidylinositol-4,5-bisphosphate 5-phosphatase activity	0.155348578977079	0.413523122134223	1	6
GO:0005459 UDP-galactose transmembrane transporter activity	1	0.155348578977079	0.055	0.167	Molecular Function	GO:0005459	UDP-galactose transmembrane transporter activity	0.155348578977079	0.413523122134223	1	6
GO:0005460 UDP-glucose transmembrane transporter activity	1	0.155348578977079	0.055	0.167	Molecular Function	GO:0005460	UDP-glucose transmembrane transporter activity	0.155348578977079	0.413523122134223	1	6
GO:0008863 formate dehydrogenase (NAD+) activity	1	0.155348578977079	0.055	0.167	Molecular Function	GO:0008863	formate dehydrogenase (NAD+) activity	0.155348578977079	0.413523122134223	1	6
GO:0008962 phosphatidylglycerophosphatase activity	1	0.155348578977079	0.055	0.167	Molecular Function	GO:0008962	phosphatidylglycerophosphatase activity	0.155348578977079	0.413523122134223	1	6
GO:0106019 phosphatidylinositol-4,5-bisphosphate phosphatase activity	1	0.155348578977079	0.055	0.167	Molecular Function	GO:0106019	phosphatidylinositol-4,5-bisphosphate phosphatase activity	0.155348578977079	0.413523122134223	1	6
GO:0106245 L-serine-phosphatidylethanolamine phosphatidyltransferase activity	1	0.155348578977079	0.055	0.167	Molecular Function	GO:0106245	L-serine-phosphatidylethanolamine phosphatidyltransferase activity	0.155348578977079	0.413523122134223	1	6
GO:0009845 seed germination	4	0.158514621406933	0.294	0.058	Biological Process	GO:0009845	seed germination	0.158514621406933	0.362625665215183	4	69
GO:0043177 organic acid binding	5	0.158690972711623	0.277	0.049	Molecular Function	GO:0043177	organic acid binding	0.158690972711623	0.420418264198091	5	103
GO:0043231 intracellular membrane-bounded organelle	391	0.160277452801596	38.446	0.032	Cellular Component	GO:0043231	intracellular membrane-bounded organelle	0.160277452801596	0.83914789020684	391	12337
GO:0004869 cysteine-type endopeptidase inhibitor activity	5	0.163175943044977	0.277	0.048	Molecular Function	GO:0004869	cysteine-type endopeptidase inhibitor activity	0.163175943044977	0.430261095104445	5	104
GO:0043227 membrane-bounded organelle	391	0.163736173698896	38.446	0.032	Cellular Component	GO:0043227	membrane-bounded organelle	0.163736173698896	0.83914789020684	391	12344
GO:0006897 endocytosis	4	0.164360015395956	0.294	0.057	Biological Process	GO:0006897	endocytosis	0.164360015395956	0.374650525315941	4	70
GO:0007205 protein kinase C-activating G protein-coupled receptor signaling pathway	2	0.16487948414422	0.147	0.083	Biological Process	GO:0007205	protein kinase C-activating G protein-coupled receptor signaling pathway	0.16487948414422	0.374650525315941	2	24
GO:0009269 response to desiccation	2	0.16487948414422	0.147	0.083	Biological Process	GO:0009269	response to desiccation	0.16487948414422	0.374650525315941	2	24
GO:0043562 cellular response to nitrogen levels	2	0.16487948414422	0.147	0.083	Biological Process	GO:0043562	cellular response to nitrogen levels	0.16487948414422	0.374650525315941	2	24
GO:0016846 carbon-sulfur lyase activity	3	0.168045185153034	0.166	0.059	Molecular Function	GO:0016846	carbon-sulfur lyase activity	0.168045185153034	0.44101999296031	3	51
GO:0044267 cellular protein metabolic process	354	0.168515743649868	25.991	0.032	Biological Process	GO:0044267	cellular protein metabolic process	0.168515743649868	0.376377276859029	354	11121
GO:0015079 potassium ion transmembrane transporter activity	7	0.16888924894906	0.388	0.043	Molecular Function	GO:0015079	potassium ion transmembrane transporter activity	0.16888924894906	0.441163972722077	7	163
GO:0006658 phosphatidylserine metabolic process	1	0.16925842036264	0.073	0.167	Biological Process	GO:0006658	phosphatidylserine metabolic process	0.16925842036264	0.376377276859029	1	6
GO:0006659 phosphatidylserine biosynthetic process	1	0.16925842036264	0.073	0.167	Biological Process	GO:0006659	phosphatidylserine biosynthetic process	0.16925842036264	0.376377276859029	1	6
GO:0010286 heat acclimation	1	0.16925842036264	0.073	0.167	Biological Process	GO:0010286	heat acclimation	0.16925842036264	0.376377276859029	1	6
GO:0010353 response to trehalose	1	0.16925842036264	0.073	0.167	Biological Process	GO:0010353	response to trehalose	0.16925842036264	0.376377276859029	1	6
GO:0010506 regulation of autophagy	1	0.16925842036264	0.073	0.167	Biological Process	GO:0010506	regulation of autophagy	0.16925842036264	0.376377276859029	1	6
GO:0015942 formate metabolic process	1	0.16925842036264	0.073	0.167	Biological Process	GO:0015942	formate metabolic process	0.16925842036264	0.376377276859029	1	6
GO:0042183 formate catabolic process	1	0.16925842036264	0.073	0.167	Biological Process	GO:0042183	formate catabolic process	0.16925842036264	0.376377276859029	1	6
GO:0051054 positive regulation of DNA metabolic process	1	0.16925842036264	0.073	0.167	Biological Process	GO:0051054	positive regulation of DNA metabolic process	0.16925842036264	0.376377276859029	1	6
GO:0061615 glycolytic process through fructose-6-phosphate	1	0.16925842036264	0.073	0.167	Biological Process	GO:0061615	glycolytic process through fructose-6-phosphate	0.16925842036264	0.376377276859029	1	6
GO:0097250 mitochondrial respirasome assembly	1	0.16925842036264	0.073	0.167	Biological Process	GO:0097250	mitochondrial respirasome assembly	0.16925842036264	0.376377276859029	1	6
GO:0106074 aminoacyl-tRNA metabolism involved in translational fidelity	1	0.16925842036264	0.073	0.167	Biological Process	GO:0106074	aminoacyl-tRNA metabolism involved in translational fidelity	0.16925842036264	0.376377276859029	1	6
GO:1900367 positive regulation of defense response to insect	1	0.16925842036264	0.073	0.167	Biological Process	GO:1900367	positive regulation of defense response to insect	0.16925842036264	0.376377276859029	1	6
GO:0006783 heme biosynthetic process	3	0.171594215220739	0.22	0.064	Biological Process	GO:0006783	heme biosynthetic process	0.171594215220739	0.380668415069289	3	47
GO:0016778 diphosphotransferase activity	2	0.171736517778984	0.111	0.074	Molecular Function	GO:0016778	diphosphotransferase activity	0.171736517778984	0.442399601098858	2	27
GO:0032452 histone demethylase activity	2	0.171736517778984	0.111	0.074	Molecular Function	GO:0032452	histone demethylase activity	0.171736517778984	0.442399601098858	2	27
GO:0140457 protein demethylase activity	2	0.171736517778984	0.111	0.074	Molecular Function	GO:0140457	protein demethylase activity	0.171736517778984	0.442399601098858	2	27
GO:0010467 gene expression	294	0.171751281946942	21.586	0.032	Biological Process	GO:0010467	gene expression	0.171751281946942	0.380668415069289	294	9188
GO:0018105 peptidyl-serine phosphorylation	2	0.175799586270347	0.147	0.08	Biological Process	GO:0018105	peptidyl-serine phosphorylation	0.175799586270347	0.388367713459983	2	25
GO:0018209 peptidyl-serine modification	2	0.175799586270347	0.147	0.08	Biological Process	GO:0018209	peptidyl-serine modification	0.175799586270347	0.388367713459983	2	25
GO:0003730 mRNA 3'-UTR binding	1	0.178785828533349	0.055	0.143	Molecular Function	GO:0003730	mRNA 3'-UTR binding	0.178785828533349	0.455665209267252	1	7
GO:0005262 calcium channel activity	1	0.178785828533349	0.055	0.143	Molecular Function	GO:0005262	calcium channel activity	0.178785828533349	0.455665209267252	1	7
GO:0010026 trichome differentiation	3	0.179178471140184	0.22	0.062	Biological Process	GO:0010026	trichome differentiation	0.179178471140184	0.395186448583244	3	48
GO:0000987 cis-regulatory region sequence-specific DNA binding	7	0.179862548350228	0.388	0.042	Molecular Function	GO:0000987	cis-regulatory region sequence-specific DNA binding	0.179862548350228	0.455665209267252	7	166
GO:0055082 cellular chemical homeostasis	9	0.181709599571478	0.661	0.043	Biological Process	GO:0055082	cellular chemical homeostasis	0.181709599571478	0.400116251825144	9	207
GO:0009044 xylan 1,4-beta-xylosidase activity	2	0.181738239884865	0.111	0.071	Molecular Function	GO:0009044	xylan 1,4-beta-xylosidase activity	0.181738239884865	0.455665209267252	2	28
GO:0015018 galactosylgalactosylxylosylprotein 3-beta-glucuronosyltransferase activity	2	0.181738239884865	0.111	0.071	Molecular Function	GO:0015018	galactosylgalactosylxylosylprotein 3-beta-glucuronosyltransferase activity	0.181738239884865	0.455665209267252	2	28
GO:0017111 nucleoside-triphosphatase activity	47	0.181776997614664	2.608	0.032	Molecular Function	GO:0017111	nucleoside-triphosphatase activity	0.181776997614664	0.455665209267252	47	1473
GO:0030136 clathrin-coated vesicle	4	0.182312029406253	0.393	0.055	Cellular Component	GO:0030136	clathrin-coated vesicle	0.182312029406253	0.862751626211099	4	73
GO:0010638 positive regulation of organelle organization	4	0.182341842506332	0.294	0.055	Biological Process	GO:0010638	positive regulation of organelle organization	0.182341842506332	0.400855562713107	4	73
GO:0019898 extrinsic component of membrane	5	0.184034495305276	0.492	0.051	Cellular Component	GO:0019898	extrinsic component of membrane	0.184034495305276	0.862751626211099	5	99
GO:0016021 integral component of membrane	443	0.186223477071149	43.559	0.031	Cellular Component	GO:0016021	integral component of membrane	0.186223477071149	0.862751626211099	443	14086
GO:0046890 regulation of lipid biosynthetic process	2	0.186828844254004	0.147	0.077	Biological Process	GO:0046890	regulation of lipid biosynthetic process	0.186828844254004	0.410052917908139	2	26
GO:1901565 organonitrogen compound catabolic process	47	0.187341258846928	3.451	0.035	Biological Process	GO:1901565	organonitrogen compound catabolic process	0.187341258846928	0.410511153907692	47	1348
GO:0006568 tryptophan metabolic process	4	0.188474963125102	0.294	0.054	Biological Process	GO:0006568	tryptophan metabolic process	0.188474963125102	0.411660985694891	4	74
GO:0006586 indolalkylamine metabolic process	4	0.188474963125102	0.294	0.054	Biological Process	GO:0006586	indolalkylamine metabolic process	0.188474963125102	0.411660985694891	4	74
GO:0030674 protein-macromolecule adaptor activity	5	0.191096513596662	0.277	0.045	Molecular Function	GO:0030674	protein-macromolecule adaptor activity	0.191096513596662	0.47657312270192	5	110
GO:0016872 intramolecular lyase activity	2	0.191822813252115	0.111	0.069	Molecular Function	GO:0016872	intramolecular lyase activity	0.191822813252115	0.47657312270192	2	29
GO:0055065 metal ion homeostasis	8	0.19207420216782	0.587	0.044	Biological Process	GO:0055065	metal ion homeostasis	0.19207420216782	0.418845679565956	8	182
GO:1905421 regulation of plant organ morphogenesis	1	0.194542666875849	0.073	0.143	Biological Process	GO:1905421	regulation of plant organ morphogenesis	0.194542666875849	0.423545387465616	1	7
GO:0032580 Golgi cisterna membrane	1	0.194552664840602	0.098	0.143	Cellular Component	GO:0032580	Golgi cisterna membrane	0.194552664840602	0.862751626211099	1	7
GO:0009654 photosystem II oxygen evolving complex	4	0.19464518396226	0.393	0.053	Cellular Component	GO:0009654	photosystem II oxygen evolving complex	0.19464518396226	0.862751626211099	4	75
GO:0001558 regulation of cell growth	2	0.197950518197694	0.147	0.074	Biological Process	GO:0001558	regulation of cell growth	0.197950518197694	0.428892789428337	2	27
GO:0006526 arginine biosynthetic process	2	0.197950518197694	0.147	0.074	Biological Process	GO:0006526	arginine biosynthetic process	0.197950518197694	0.428892789428337	2	27
GO:0030004 cellular monovalent inorganic cation homeostasis	2	0.197950518197694	0.147	0.074	Biological Process	GO:0030004	cellular monovalent inorganic cation homeostasis	0.197950518197694	0.428892789428337	2	27
GO:0050793 regulation of developmental process	16	0.200563973725938	1.175	0.039	Biological Process	GO:0050793	regulation of developmental process	0.200563973725938	0.433859987963948	16	415
GO:0008889 glycerophosphodiester phosphodiesterase activity	1	0.201573096006638	0.055	0.125	Molecular Function	GO:0008889	glycerophosphodiester phosphodiesterase activity	0.201573096006638	0.498581241892526	1	8
GO:0002229 defense response to oomycetes	3	0.202443070746955	0.22	0.059	Biological Process	GO:0002229	defense response to oomycetes	0.202443070746955	0.436375551473405	3	51
GO:0002239 response to oomycetes	3	0.202443070746955	0.22	0.059	Biological Process	GO:0002239	response to oomycetes	0.202443070746955	0.436375551473405	3	51
GO:0050801 ion homeostasis	11	0.202695152607469	0.808	0.041	Biological Process	GO:0050801	ion homeostasis	0.202695152607469	0.436375551473405	11	270
GO:0030041 actin filament polymerization	4	0.20725215346369	0.294	0.052	Biological Process	GO:0030041	actin filament polymerization	0.20725215346369	0.444769700766521	4	77
GO:0030833 regulation of actin filament polymerization	4	0.20725215346369	0.294	0.052	Biological Process	GO:0030833	regulation of actin filament polymerization	0.20725215346369	0.444769700766521	4	77
GO:0006986 response to unfolded protein	2	0.209148784583231	0.147	0.071	Biological Process	GO:0006986	response to unfolded protein	0.209148784583231	0.445305758671697	2	28
GO:0009065 glutamine family amino acid catabolic process	2	0.209148784583231	0.147	0.071	Biological Process	GO:0009065	glutamine family amino acid catabolic process	0.209148784583231	0.445305758671697	2	28
GO:0022604 regulation of cell morphogenesis	2	0.209148784583231	0.147	0.071	Biological Process	GO:0022604	regulation of cell morphogenesis	0.209148784583231	0.445305758671697	2	28
GO:0034620 cellular response to unfolded protein	2	0.209148784583231	0.147	0.071	Biological Process	GO:0034620	cellular response to unfolded protein	0.209148784583231	0.445305758671697	2	28
GO:0043455 regulation of secondary metabolic process	2	0.209148784583231	0.147	0.071	Biological Process	GO:0043455	regulation of secondary metabolic process	0.209148784583231	0.445305758671697	2	28
GO:0060090 molecular adaptor activity	5	0.210582334495386	0.277	0.044	Molecular Function	GO:0060090	molecular adaptor activity	0.210582334495386	0.51641425522872	5	114
GO:0033293 monocarboxylic acid binding	4	0.21063050123819	0.222	0.047	Molecular Function	GO:0033293	monocarboxylic acid binding	0.21063050123819	0.51641425522872	4	85
GO:0010015 root morphogenesis	5	0.210673369340703	0.367	0.048	Biological Process	GO:0010015	root morphogenesis	0.210673369340703	0.44784653356703	5	104
GO:0071555 cell wall organization	25	0.213043464527698	1.836	0.036	Biological Process	GO:0071555	cell wall organization	0.213043464527698	0.452173883895523	25	690
GO:0090351 seedling development	4	0.213627669246199	0.294	0.051	Biological Process	GO:0090351	seedling development	0.213627669246199	0.452703148622039	4	78
GO:0043436 oxoacid metabolic process	69	0.214376271266293	5.066	0.034	Biological Process	GO:0043436	oxoacid metabolic process	0.214376271266293	0.453578589596288	69	2055
GO:0009718 anthocyanin-containing compound biosynthetic process	1	0.219057916104102	0.073	0.125	Biological Process	GO:0009718	anthocyanin-containing compound biosynthetic process	0.219057916104102	0.455640465496532	1	8
GO:0010091 trichome branching	1	0.219057916104102	0.073	0.125	Biological Process	GO:0010091	trichome branching	0.219057916104102	0.455640465496532	1	8
GO:0010225 response to UV-C	1	0.219057916104102	0.073	0.125	Biological Process	GO:0010225	response to UV-C	0.219057916104102	0.455640465496532	1	8
GO:0010942 positive regulation of cell death	1	0.219057916104102	0.073	0.125	Biological Process	GO:0010942	positive regulation of cell death	0.219057916104102	0.455640465496532	1	8
GO:0031537 regulation of anthocyanin metabolic process	1	0.219057916104102	0.073	0.125	Biological Process	GO:0031537	regulation of anthocyanin metabolic process	0.219057916104102	0.455640465496532	1	8
GO:0051788 response to misfolded protein	1	0.219057916104102	0.073	0.125	Biological Process	GO:0051788	response to misfolded protein	0.219057916104102	0.455640465496532	1	8
GO:0055062 phosphate ion homeostasis	1	0.219057916104102	0.073	0.125	Biological Process	GO:0055062	phosphate ion homeostasis	0.219057916104102	0.455640465496532	1	8
GO:0055081 anion homeostasis	1	0.219057916104102	0.073	0.125	Biological Process	GO:0055081	anion homeostasis	0.219057916104102	0.455640465496532	1	8
GO:0071218 cellular response to misfolded protein	1	0.219057916104102	0.073	0.125	Biological Process	GO:0071218	cellular response to misfolded protein	0.219057916104102	0.455640465496532	1	8
GO:0071712 ER-associated misfolded protein catabolic process	1	0.219057916104102	0.073	0.125	Biological Process	GO:0071712	ER-associated misfolded protein catabolic process	0.219057916104102	0.455640465496532	1	8
GO:0072506 trivalent inorganic anion homeostasis	1	0.219057916104102	0.073	0.125	Biological Process	GO:0072506	trivalent inorganic anion homeostasis	0.219057916104102	0.455640465496532	1	8
GO:0046174 polyol catabolic process	4	0.220056668696627	0.294	0.051	Biological Process	GO:0046174	polyol catabolic process	0.220056668696627	0.456343885275687	4	79
GO:0006144 purine nucleobase metabolic process	2	0.220408696068805	0.147	0.069	Biological Process	GO:0006144	purine nucleobase metabolic process	0.220408696068805	0.456343885275687	2	29
GO:0008272 sulfate transport	2	0.220408696068805	0.147	0.069	Biological Process	GO:0008272	sulfate transport	0.220408696068805	0.456343885275687	2	29
GO:0050897 cobalt ion binding	2	0.222453826249791	0.111	0.062	Molecular Function	GO:0050897	cobalt ion binding	0.222453826249791	0.536756112531602	2	32
GO:0004420 hydroxymethylglutaryl-CoA reductase (NADPH) activity	1	0.223728397531061	0.055	0.111	Molecular Function	GO:0004420	hydroxymethylglutaryl-CoA reductase (NADPH) activity	0.223728397531061	0.536756112531602	1	9
GO:0008441 3'(2'),5'-bisphosphate nucleotidase activity	1	0.223728397531061	0.055	0.111	Molecular Function	GO:0008441	3'(2'),5'-bisphosphate nucleotidase activity	0.223728397531061	0.536756112531602	1	9
GO:0010945 CoA pyrophosphatase activity	1	0.223728397531061	0.055	0.111	Molecular Function	GO:0010945	CoA pyrophosphatase activity	0.223728397531061	0.536756112531602	1	9
GO:0047150 betaine-homocysteine S-methyltransferase activity	1	0.223728397531061	0.055	0.111	Molecular Function	GO:0047150	betaine-homocysteine S-methyltransferase activity	0.223728397531061	0.536756112531602	1	9
GO:0032271 regulation of protein polymerization	4	0.226536315102542	0.294	0.05	Biological Process	GO:0032271	regulation of protein polymerization	0.226536315102542	0.46688582015036	4	80
GO:0046164 alcohol catabolic process	4	0.226536315102542	0.294	0.05	Biological Process	GO:0046164	alcohol catabolic process	0.226536315102542	0.46688582015036	4	80
GO:0060560 developmental growth involved in morphogenesis	4	0.226536315102542	0.294	0.05	Biological Process	GO:0060560	developmental growth involved in morphogenesis	0.226536315102542	0.46688582015036	4	80
GO:0044087 regulation of cellular component biogenesis	5	0.227187084241572	0.367	0.047	Biological Process	GO:0044087	regulation of cellular component biogenesis	0.227187084241572	0.467514365136387	5	107
GO:0010029 regulation of seed germination	2	0.231716142881414	0.147	0.067	Biological Process	GO:0010029	regulation of seed germination	0.231716142881414	0.474667007841926	2	30
GO:0042214 terpene metabolic process	2	0.231716142881414	0.147	0.067	Biological Process	GO:0042214	terpene metabolic process	0.231716142881414	0.474667007841926	2	30
GO:0046620 regulation of organ growth	2	0.231716142881414	0.147	0.067	Biological Process	GO:0046620	regulation of organ growth	0.231716142881414	0.474667007841926	2	30
GO:0031201 SNARE complex	2	0.231722612911409	0.197	0.067	Cellular Component	GO:0031201	SNARE complex	0.231722612911409	1	2	30
GO:0042937 tripeptide transmembrane transporter activity	2	0.232752978665856	0.111	0.061	Molecular Function	GO:0042937	tripeptide transmembrane transporter activity	0.232752978665856	0.553654957762611	2	33
GO:0071916 dipeptide transmembrane transporter activity	2	0.232752978665856	0.111	0.061	Molecular Function	GO:0071916	dipeptide transmembrane transporter activity	0.232752978665856	0.553654957762611	2	33
GO:0090626 plant epidermis morphogenesis	3	0.234443867889981	0.22	0.055	Biological Process	GO:0090626	plant epidermis morphogenesis	0.234443867889981	0.47952815338465	3	55
GO:0065003 protein-containing complex assembly	37	0.238321918237715	2.717	0.035	Biological Process	GO:0065003	protein-containing complex assembly	0.238321918237715	0.486723917609352	37	1072
GO:0022603 regulation of anatomical structure morphogenesis	3	0.242582584746837	0.22	0.054	Biological Process	GO:0022603	regulation of anatomical structure morphogenesis	0.242582584746837	0.48828256595408	3	56
GO:0008535 respiratory chain complex IV assembly	1	0.242827539735688	0.073	0.111	Biological Process	GO:0008535	respiratory chain complex IV assembly	0.242827539735688	0.48828256595408	1	9
GO:0009838 abscission	1	0.242827539735688	0.073	0.111	Biological Process	GO:0009838	abscission	0.242827539735688	0.48828256595408	1	9
GO:0009939 positive regulation of gibberellic acid mediated signaling pathway	1	0.242827539735688	0.073	0.111	Biological Process	GO:0009939	positive regulation of gibberellic acid mediated signaling pathway	0.242827539735688	0.48828256595408	1	9
GO:0033617 mitochondrial cytochrome c oxidase assembly	1	0.242827539735688	0.073	0.111	Biological Process	GO:0033617	mitochondrial cytochrome c oxidase assembly	0.242827539735688	0.48828256595408	1	9
GO:0060962 regulation of ribosomal protein gene transcription by RNA polymerase II	1	0.242827539735688	0.073	0.111	Biological Process	GO:0060962	regulation of ribosomal protein gene transcription by RNA polymerase II	0.242827539735688	0.48828256595408	1	9
GO:0071324 cellular response to disaccharide stimulus	1	0.242827539735688	0.073	0.111	Biological Process	GO:0071324	cellular response to disaccharide stimulus	0.242827539735688	0.48828256595408	1	9
GO:1900458 negative regulation of brassinosteroid mediated signaling pathway	1	0.242827539735688	0.073	0.111	Biological Process	GO:1900458	negative regulation of brassinosteroid mediated signaling pathway	0.242827539735688	0.48828256595408	1	9
GO:0005664 nuclear origin of replication recognition complex	1	0.24284124607311	0.098	0.111	Cellular Component	GO:0005664	nuclear origin of replication recognition complex	0.24284124607311	1	1	9
GO:0046148 pigment biosynthetic process	7	0.242943723520132	0.514	0.042	Biological Process	GO:0046148	pigment biosynthetic process	0.242943723520132	0.48828256595408	7	166
GO:0120251 hydrocarbon biosynthetic process	2	0.243057815744894	0.147	0.065	Biological Process	GO:0120251	hydrocarbon biosynthetic process	0.243057815744894	0.48828256595408	2	31
GO:1900140 regulation of seedling development	2	0.243057815744894	0.147	0.065	Biological Process	GO:1900140	regulation of seedling development	0.243057815744894	0.48828256595408	2	31
GO:0008271 secondary active sulfate transmembrane transporter activity	2	0.243079474447078	0.111	0.059	Molecular Function	GO:0008271	secondary active sulfate transmembrane transporter activity	0.243079474447078	0.564047296325532	2	34
GO:0015116 sulfate transmembrane transporter activity	2	0.243079474447078	0.111	0.059	Molecular Function	GO:0015116	sulfate transmembrane transporter activity	0.243079474447078	0.564047296325532	2	34
GO:0051258 protein polymerization	5	0.244063332327764	0.367	0.045	Biological Process	GO:0051258	protein polymerization	0.244063332327764	0.489575111731656	5	110
GO:0019725 cellular homeostasis	19	0.244465075930707	1.395	0.036	Biological Process	GO:0019725	cellular homeostasis	0.244465075930707	0.489654492827136	19	522
GO:0003958 NADPH-hemoprotein reductase activity	1	0.245269250141188	0.055	0.1	Molecular Function	GO:0003958	NADPH-hemoprotein reductase activity	0.245269250141188	0.564047296325532	1	10
GO:0004551 nucleotide diphosphatase activity	1	0.245269250141188	0.055	0.1	Molecular Function	GO:0004551	nucleotide diphosphatase activity	0.245269250141188	0.564047296325532	1	10
GO:0009924 octadecanal decarbonylase activity	1	0.245269250141188	0.055	0.1	Molecular Function	GO:0009924	octadecanal decarbonylase activity	0.245269250141188	0.564047296325532	1	10
GO:0071771 aldehyde decarbonylase activity	1	0.245269250141188	0.055	0.1	Molecular Function	GO:0071771	aldehyde decarbonylase activity	0.245269250141188	0.564047296325532	1	10
GO:1990465 aldehyde oxygenase (deformylating) activity	1	0.245269250141188	0.055	0.1	Molecular Function	GO:1990465	aldehyde oxygenase (deformylating) activity	0.245269250141188	0.564047296325532	1	10
GO:0015035 protein-disulfide reductase activity	9	0.24602619450687	0.499	0.037	Molecular Function	GO:0015035	protein-disulfide reductase activity	0.24602619450687	0.564047296325532	9	246
GO:0019888 protein phosphatase regulator activity	4	0.24620311324406	0.222	0.044	Molecular Function	GO:0019888	protein phosphatase regulator activity	0.24620311324406	0.564047296325532	4	91
GO:0009267 cellular response to starvation	4	0.246250941713479	0.294	0.048	Biological Process	GO:0009267	cellular response to starvation	0.246250941713479	0.492501883426957	4	83
GO:0098771 inorganic ion homeostasis	9	0.248527088566615	0.661	0.04	Biological Process	GO:0098771	inorganic ion homeostasis	0.248527088566615	0.496319975985324	9	225
GO:0042168 heme metabolic process	3	0.25076613231847	0.22	0.053	Biological Process	GO:0042168	heme metabolic process	0.25076613231847	0.498436793577074	3	57
GO:0071695 anatomical structure maturation	3	0.25076613231847	0.22	0.053	Biological Process	GO:0071695	anatomical structure maturation	0.25076613231847	0.498436793577074	3	57
GO:0006486 protein glycosylation	14	0.252009650274953	1.028	0.037	Biological Process	GO:0006486	protein glycosylation	0.252009650274953	0.498436793577074	14	374
GO:0009101 glycoprotein biosynthetic process	14	0.252009650274953	1.028	0.037	Biological Process	GO:0009101	glycoprotein biosynthetic process	0.252009650274953	0.498436793577074	14	374
GO:0043413 macromolecule glycosylation	14	0.252009650274953	1.028	0.037	Biological Process	GO:0043413	macromolecule glycosylation	0.252009650274953	0.498436793577074	14	374
GO:0006790 sulfur compound metabolic process	24	0.252692539321159	1.762	0.035	Biological Process	GO:0006790	sulfur compound metabolic process	0.252692539321159	0.498436793577074	24	678
GO:0008064 regulation of actin polymerization or depolymerization	4	0.252905059462924	0.294	0.048	Biological Process	GO:0008064	regulation of actin polymerization or depolymerization	0.252905059462924	0.498436793577074	4	84
GO:0030832 regulation of actin filament length	4	0.252905059462924	0.294	0.048	Biological Process	GO:0030832	regulation of actin filament length	0.252905059462924	0.498436793577074	4	84
GO:0110053 regulation of actin filament organization	4	0.252905059462924	0.294	0.048	Biological Process	GO:0110053	regulation of actin filament organization	0.252905059462924	0.498436793577074	4	84
GO:0072348 sulfur compound transport	2	0.254421170285955	0.147	0.062	Biological Process	GO:0072348	sulfur compound transport	0.254421170285955	0.500694937738881	2	32
GO:0016049 cell growth	5	0.255492442914199	0.367	0.045	Biological Process	GO:0016049	cell growth	0.255492442914199	0.502072358749997	5	112
GO:0051130 positive regulation of cellular component organization	4	0.259595853243421	0.294	0.047	Biological Process	GO:0051130	positive regulation of cellular component organization	0.259595853243421	0.509395636553129	4	85
GO:0006633 fatty acid biosynthetic process	12	0.261001145121891	0.881	0.038	Biological Process	GO:0006633	fatty acid biosynthetic process	0.261001145121891	0.511410939427241	12	317
GO:0097599 xylanase activity	2	0.263777239615882	0.111	0.056	Molecular Function	GO:0097599	xylanase activity	0.263777239615882	0.590527346211978	2	36
GO:1901682 sulfur compound transmembrane transporter activity	2	0.263777239615882	0.111	0.056	Molecular Function	GO:1901682	sulfur compound transmembrane transporter activity	0.263777239615882	0.590527346211978	2	36
GO:0015036 disulfide oxidoreductase activity	9	0.264053486130121	0.499	0.036	Molecular Function	GO:0015036	disulfide oxidoreductase activity	0.264053486130121	0.590527346211978	9	251
GO:0019216 regulation of lipid metabolic process	2	0.265794392862701	0.147	0.061	Biological Process	GO:0019216	regulation of lipid metabolic process	0.265794392862701	0.518860990535677	2	33
GO:0042938 dipeptide transport	2	0.265794392862701	0.147	0.061	Biological Process	GO:0042938	dipeptide transport	0.265794392862701	0.518860990535677	2	33
GO:0031985 Golgi cisterna	1	0.265889839348684	0.098	0.1	Cellular Component	GO:0031985	Golgi cisterna	0.265889839348684	1	1	10
GO:0004310 farnesyl-diphosphate farnesyltransferase activity	1	0.266212685591088	0.055	0.091	Molecular Function	GO:0004310	farnesyl-diphosphate farnesyltransferase activity	0.266212685591088	0.590527346211978	1	11
GO:0042285 xylosyltransferase activity	1	0.266212685591088	0.055	0.091	Molecular Function	GO:0042285	xylosyltransferase activity	0.266212685591088	0.590527346211978	1	11
GO:0047769 arogenate dehydratase activity	1	0.266212685591088	0.055	0.091	Molecular Function	GO:0047769	arogenate dehydratase activity	0.266212685591088	0.590527346211978	1	11
GO:0051787 misfolded protein binding	1	0.266212685591088	0.055	0.091	Molecular Function	GO:0051787	misfolded protein binding	0.266212685591088	0.590527346211978	1	11
GO:0051996 squalene synthase activity	1	0.266212685591088	0.055	0.091	Molecular Function	GO:0051996	squalene synthase activity	0.266212685591088	0.590527346211978	1	11
GO:1901616 organic hydroxy compound catabolic process	4	0.266320590314684	0.294	0.047	Biological Process	GO:1901616	organic hydroxy compound catabolic process	0.266320590314684	0.518860990535677	4	86
GO:0019752 carboxylic acid metabolic process	67	0.266338407863728	4.919	0.033	Biological Process	GO:0019752	carboxylic acid metabolic process	0.266338407863728	0.518860990535677	67	2033
GO:0016160 amylase activity	3	0.269504794012751	0.166	0.046	Molecular Function	GO:0016160	amylase activity	0.269504794012751	0.595467114043983	3	65
GO:0019208 phosphatase regulator activity	4	0.270599901291311	0.222	0.042	Molecular Function	GO:0019208	phosphatase regulator activity	0.270599901291311	0.595532853629302	4	95
GO:1902903 regulation of supramolecular fiber organization	4	0.273076564064519	0.294	0.046	Biological Process	GO:1902903	regulation of supramolecular fiber organization	0.273076564064519	0.531222323187381	4	87
GO:0009735 response to cytokinin	8	0.274355707554809	0.587	0.04	Biological Process	GO:0009735	response to cytokinin	0.274355707554809	0.532943845709916	8	202
GO:0006520 cellular amino acid metabolic process	37	0.27593013453047	2.717	0.034	Biological Process	GO:0006520	cellular amino acid metabolic process	0.27593013453047	0.53523320213084	37	1093
GO:0031669 cellular response to nutrient levels	4	0.27986109615716	0.294	0.045	Biological Process	GO:0031669	cellular response to nutrient levels	0.27986109615716	0.541305010020717	4	88
GO:0043254 regulation of protein-containing complex assembly	4	0.27986109615716	0.294	0.045	Biological Process	GO:0043254	regulation of protein-containing complex assembly	0.27986109615716	0.541305010020717	4	88
GO:0006082 organic acid metabolic process	69	0.28313990466108	5.066	0.033	Biological Process	GO:0006082	organic acid metabolic process	0.28313990466108	0.541965595915786	69	2109
GO:0015095 magnesium ion transmembrane transporter activity	2	0.284477508178989	0.111	0.053	Molecular Function	GO:0015095	magnesium ion transmembrane transporter activity	0.284477508178989	0.623329075716516	2	38
GO:0045229 external encapsulating structure organization	25	0.284873916049711	1.836	0.035	Biological Process	GO:0045229	external encapsulating structure organization	0.284873916049711	0.541965595915786	25	723
GO:0043086 negative regulation of catalytic activity	10	0.285341685499024	0.734	0.038	Biological Process	GO:0043086	negative regulation of catalytic activity	0.285341685499024	0.541965595915786	10	264
GO:0044092 negative regulation of molecular function	10	0.285341685499024	0.734	0.038	Biological Process	GO:0044092	negative regulation of molecular function	0.285341685499024	0.541965595915786	10	264
GO:0009736 cytokinin-activated signaling pathway	6	0.285716911421008	0.441	0.041	Biological Process	GO:0009736	cytokinin-activated signaling pathway	0.285716911421008	0.541965595915786	6	146
GO:0071368 cellular response to cytokinin stimulus	6	0.285716911421008	0.441	0.041	Biological Process	GO:0071368	cellular response to cytokinin stimulus	0.285716911421008	0.541965595915786	6	146
GO:1905392 plant organ morphogenesis	6	0.285716911421008	0.441	0.041	Biological Process	GO:1905392	plant organ morphogenesis	0.285716911421008	0.541965595915786	6	146
GO:0009100 glycoprotein metabolic process	14	0.286237783344574	1.028	0.036	Biological Process	GO:0009100	glycoprotein metabolic process	0.286237783344574	0.541965595915786	14	385
GO:0004832 valine-tRNA ligase activity	1	0.286575263790956	0.055	0.083	Molecular Function	GO:0004832	valine-tRNA ligase activity	0.286575263790956	0.623329075716516	1	12
GO:0005345 purine nucleobase transmembrane transporter activity	1	0.286575263790956	0.055	0.083	Molecular Function	GO:0005345	purine nucleobase transmembrane transporter activity	0.286575263790956	0.623329075716516	1	12
GO:0006696 ergosterol biosynthetic process	1	0.288219869425629	0.073	0.091	Biological Process	GO:0006696	ergosterol biosynthetic process	0.288219869425629	0.541965595915786	1	11
GO:0008204 ergosterol metabolic process	1	0.288219869425629	0.073	0.091	Biological Process	GO:0008204	ergosterol metabolic process	0.288219869425629	0.541965595915786	1	11
GO:0009624 response to nematode	1	0.288219869425629	0.073	0.091	Biological Process	GO:0009624	response to nematode	0.288219869425629	0.541965595915786	1	11
GO:0009825 multidimensional cell growth	1	0.288219869425629	0.073	0.091	Biological Process	GO:0009825	multidimensional cell growth	0.288219869425629	0.541965595915786	1	11
GO:0044107 cellular alcohol metabolic process	1	0.288219869425629	0.073	0.091	Biological Process	GO:0044107	cellular alcohol metabolic process	0.288219869425629	0.541965595915786	1	11
GO:0044108 cellular alcohol biosynthetic process	1	0.288219869425629	0.073	0.091	Biological Process	GO:0044108	cellular alcohol biosynthetic process	0.288219869425629	0.541965595915786	1	11
GO:0051923 sulfation	1	0.288219869425629	0.073	0.091	Biological Process	GO:0051923	sulfation	0.288219869425629	0.541965595915786	1	11
GO:0065001 specification of axis polarity	1	0.288219869425629	0.073	0.091	Biological Process	GO:0065001	specification of axis polarity	0.288219869425629	0.541965595915786	1	11
GO:0097384 cellular lipid biosynthetic process	1	0.288219869425629	0.073	0.091	Biological Process	GO:0097384	cellular lipid biosynthetic process	0.288219869425629	0.541965595915786	1	11
GO:1902653 secondary alcohol biosynthetic process	1	0.288219869425629	0.073	0.091	Biological Process	GO:1902653	secondary alcohol biosynthetic process	0.288219869425629	0.541965595915786	1	11
GO:1904294 positive regulation of ERAD pathway	1	0.288219869425629	0.073	0.091	Biological Process	GO:1904294	positive regulation of ERAD pathway	0.288219869425629	0.541965595915786	1	11
GO:1905898 positive regulation of response to endoplasmic reticulum stress	1	0.288219869425629	0.073	0.091	Biological Process	GO:1905898	positive regulation of response to endoplasmic reticulum stress	0.288219869425629	0.541965595915786	1	11
GO:0019897 extrinsic component of plasma membrane	1	0.288237481631442	0.098	0.091	Cellular Component	GO:0019897	extrinsic component of plasma membrane	0.288237481631442	1	1	11
GO:0031234 extrinsic component of cytoplasmic side of plasma membrane	1	0.288237481631442	0.098	0.091	Cellular Component	GO:0031234	extrinsic component of cytoplasmic side of plasma membrane	0.288237481631442	1	1	11
GO:0005886 plasma membrane	50	0.289671179991969	4.916	0.033	Cellular Component	GO:0005886	plasma membrane	0.289671179991969	1	50	1511
GO:0010647 positive regulation of cell communication	3	0.292181721879322	0.22	0.048	Biological Process	GO:0010647	positive regulation of cell communication	0.292181721879322	0.548652344417837	3	62
GO:0030014 CCR4-NOT complex	3	0.292189866265717	0.295	0.048	Cellular Component	GO:0030014	CCR4-NOT complex	0.292189866265717	1	3	62
GO:0006813 potassium ion transport	7	0.2945175624832	0.514	0.04	Biological Process	GO:0006813	potassium ion transport	0.2945175624832	0.552271490259759	7	177
GO:0019210 kinase inhibitor activity	2	0.294808865732552	0.111	0.051	Molecular Function	GO:0019210	kinase inhibitor activity	0.294808865732552	0.63875254242053	2	39
GO:0140657 ATP-dependent activity	69	0.297788957933373	3.829	0.03	Molecular Function	GO:0140657	ATP-dependent activity	0.297788957933373	0.642718252836894	69	2324
GO:0005666 RNA polymerase III complex	2	0.299882490202943	0.197	0.056	Cellular Component	GO:0005666	RNA polymerase III complex	0.299882490202943	1	2	36
GO:0045735 nutrient reservoir activity	8	0.300412514353053	0.444	0.035	Molecular Function	GO:0045735	nutrient reservoir activity	0.300412514353053	0.643629319196941	8	228
GO:0022622 root system development	14	0.30549543997388	1.028	0.036	Biological Process	GO:0022622	root system development	0.30549543997388	0.569246842883673	14	391
GO:0048364 root development	14	0.30549543997388	1.028	0.036	Biological Process	GO:0048364	root development	0.30549543997388	0.569246842883673	14	391
GO:0000036 acyl carrier activity	1	0.306373085871908	0.055	0.077	Molecular Function	GO:0000036	acyl carrier activity	0.306373085871908	0.643629319196941	1	13
GO:0015205 nucleobase transmembrane transporter activity	1	0.306373085871908	0.055	0.077	Molecular Function	GO:0015205	nucleobase transmembrane transporter activity	0.306373085871908	0.643629319196941	1	13
GO:0031593 polyubiquitin modification-dependent protein binding	1	0.306373085871908	0.055	0.077	Molecular Function	GO:0031593	polyubiquitin modification-dependent protein binding	0.306373085871908	0.643629319196941	1	13
GO:0044620 ACP phosphopantetheine attachment site binding	1	0.306373085871908	0.055	0.077	Molecular Function	GO:0044620	ACP phosphopantetheine attachment site binding	0.306373085871908	0.643629319196941	1	13
GO:0051192 prosthetic group binding	1	0.306373085871908	0.055	0.077	Molecular Function	GO:0051192	prosthetic group binding	0.306373085871908	0.643629319196941	1	13
GO:0140414 phosphopantetheine-dependent carrier activity	1	0.306373085871908	0.055	0.077	Molecular Function	GO:0140414	phosphopantetheine-dependent carrier activity	0.306373085871908	0.643629319196941	1	13
GO:0032535 regulation of cellular component size	4	0.307232340414464	0.294	0.043	Biological Process	GO:0032535	regulation of cellular component size	0.307232340414464	0.569246842883673	4	92
GO:0090066 regulation of anatomical structure size	4	0.307232340414464	0.294	0.043	Biological Process	GO:0090066	regulation of anatomical structure size	0.307232340414464	0.569246842883673	4	92
GO:0004659 prenyltransferase activity	3	0.307422232961687	0.166	0.043	Molecular Function	GO:0004659	prenyltransferase activity	0.307422232961687	0.643629319196941	3	70
GO:0006438 valyl-tRNA aminoacylation	1	0.309885855297621	0.073	0.083	Biological Process	GO:0006438	valyl-tRNA aminoacylation	0.309885855297621	0.569246842883673	1	12
GO:0006863 purine nucleobase transport	1	0.309885855297621	0.073	0.083	Biological Process	GO:0006863	purine nucleobase transport	0.309885855297621	0.569246842883673	1	12
GO:0010413 glucuronoxylan metabolic process	1	0.309885855297621	0.073	0.083	Biological Process	GO:0010413	glucuronoxylan metabolic process	0.309885855297621	0.569246842883673	1	12
GO:0010417 glucuronoxylan biosynthetic process	1	0.309885855297621	0.073	0.083	Biological Process	GO:0010417	glucuronoxylan biosynthetic process	0.309885855297621	0.569246842883673	1	12
GO:0015851 nucleobase transport	1	0.309885855297621	0.073	0.083	Biological Process	GO:0015851	nucleobase transport	0.309885855297621	0.569246842883673	1	12
GO:0044030 regulation of DNA methylation	1	0.309885855297621	0.073	0.083	Biological Process	GO:0044030	regulation of DNA methylation	0.309885855297621	0.569246842883673	1	12
GO:0046622 positive regulation of organ growth	1	0.309885855297621	0.073	0.083	Biological Process	GO:0046622	positive regulation of organ growth	0.309885855297621	0.569246842883673	1	12
GO:0060260 regulation of transcription initiation from RNA polymerase II promoter	1	0.309885855297621	0.073	0.083	Biological Process	GO:0060260	regulation of transcription initiation from RNA polymerase II promoter	0.309885855297621	0.569246842883673	1	12
GO:0060261 positive regulation of transcription initiation from RNA polymerase II promoter	1	0.309885855297621	0.073	0.083	Biological Process	GO:0060261	positive regulation of transcription initiation from RNA polymerase II promoter	0.309885855297621	0.569246842883673	1	12
GO:1904292 regulation of ERAD pathway	1	0.309885855297621	0.073	0.083	Biological Process	GO:1904292	regulation of ERAD pathway	0.309885855297621	0.569246842883673	1	12
GO:2000144 positive regulation of DNA-templated transcription, initiation	1	0.309885855297621	0.073	0.083	Biological Process	GO:2000144	positive regulation of DNA-templated transcription, initiation	0.309885855297621	0.569246842883673	1	12
GO:0046982 protein heterodimerization activity	22	0.312588555016391	1.221	0.031	Molecular Function	GO:0046982	protein heterodimerization activity	0.312588555016391	0.652003739754339	22	703
GO:0048609 multicellular organismal reproductive process	4	0.314120613131939	0.294	0.043	Biological Process	GO:0048609	multicellular organismal reproductive process	0.314120613131939	0.576242970087357	4	93
GO:0070085 glycosylation	14	0.315257104900381	1.028	0.036	Biological Process	GO:0070085	glycosylation	0.315257104900381	0.577544181335116	14	394
GO:0009834 plant-type secondary cell wall biogenesis	2	0.322442175783581	0.147	0.053	Biological Process	GO:0009834	plant-type secondary cell wall biogenesis	0.322442175783581	0.589110569810002	2	38
GO:0035265 organ growth	2	0.322442175783581	0.147	0.053	Biological Process	GO:0035265	organ growth	0.322442175783581	0.589110569810002	2	38
GO:0046983 protein dimerization activity	55	0.324140647455534	3.052	0.03	Molecular Function	GO:0046983	protein dimerization activity	0.324140647455534	0.66476590762562	55	1854
GO:0004367 glycerol-3-phosphate dehydrogenase [NAD+] activity	1	0.325621806889215	0.055	0.071	Molecular Function	GO:0004367	glycerol-3-phosphate dehydrogenase [NAD+] activity	0.325621806889215	0.66476590762562	1	14
GO:0047952 glycerol-3-phosphate dehydrogenase [NAD(P)+] activity	1	0.325621806889215	0.055	0.071	Molecular Function	GO:0047952	glycerol-3-phosphate dehydrogenase [NAD(P)+] activity	0.325621806889215	0.66476590762562	1	14
GO:0005227 calcium activated cation channel activity	2	0.325643475285775	0.111	0.048	Molecular Function	GO:0005227	calcium activated cation channel activity	0.325643475285775	0.66476590762562	2	42
GO:0022839 ion gated channel activity	2	0.325643475285775	0.111	0.048	Molecular Function	GO:0022839	ion gated channel activity	0.325643475285775	0.66476590762562	2	42
GO:0008202 steroid metabolic process	5	0.326243832005852	0.367	0.04	Biological Process	GO:0008202	steroid metabolic process	0.326243832005852	0.595251904010678	5	124
GO:0004190 aspartic-type endopeptidase activity	14	0.327031528796146	0.777	0.032	Molecular Function	GO:0004190	aspartic-type endopeptidase activity	0.327031528796146	0.66476590762562	14	436
GO:0070001 aspartic-type peptidase activity	14	0.327031528796146	0.777	0.032	Molecular Function	GO:0070001	aspartic-type peptidase activity	0.327031528796146	0.66476590762562	14	436
GO:0032956 regulation of actin cytoskeleton organization	4	0.327934287225645	0.294	0.042	Biological Process	GO:0032956	regulation of actin cytoskeleton organization	0.327934287225645	0.597529860281767	4	95
GO:0009798 axis specification	1	0.330892816344569	0.073	0.077	Biological Process	GO:0009798	axis specification	0.330892816344569	0.600492735164909	1	13
GO:0035970 peptidyl-threonine dephosphorylation	1	0.330892816344569	0.073	0.077	Biological Process	GO:0035970	peptidyl-threonine dephosphorylation	0.330892816344569	0.600492735164909	1	13
GO:0071322 cellular response to carbohydrate stimulus	1	0.330892816344569	0.073	0.077	Biological Process	GO:0071322	cellular response to carbohydrate stimulus	0.330892816344569	0.600492735164909	1	13
GO:0009898 cytoplasmic side of plasma membrane	1	0.330914454342716	0.098	0.077	Cellular Component	GO:0009898	cytoplasmic side of plasma membrane	0.330914454342716	1	1	13
GO:0015693 magnesium ion transport	2	0.333663469815785	0.147	0.051	Biological Process	GO:0015693	magnesium ion transport	0.333663469815785	0.604709130282763	2	39
GO:0032504 multicellular organism reproduction	4	0.334854868161767	0.294	0.042	Biological Process	GO:0032504	multicellular organism reproduction	0.334854868161767	0.606055932737228	4	96
GO:0003951 NAD+ kinase activity	2	0.33584740507524	0.111	0.047	Molecular Function	GO:0003951	NAD+ kinase activity	0.33584740507524	0.68021267911978	2	43
GO:0003712 transcription coregulator activity	8	0.337314777243484	0.444	0.034	Molecular Function	GO:0003712	transcription coregulator activity	0.337314777243484	0.680718268877644	8	237
GO:0048646 anatomical structure formation involved in morphogenesis	5	0.338273248336138	0.367	0.04	Biological Process	GO:0048646	anatomical structure formation involved in morphogenesis	0.338273248336138	0.611424373997939	5	126
GO:0055080 cation homeostasis	8	0.341382185026037	0.587	0.037	Biological Process	GO:0055080	cation homeostasis	0.341382185026037	0.615533014792799	8	217
GO:0032970 regulation of actin filament-based process	4	0.3417814676029	0.294	0.041	Biological Process	GO:0032970	regulation of actin filament-based process	0.3417814676029	0.615533014792799	4	97
GO:0012501 programmed cell death	3	0.342367475683569	0.22	0.044	Biological Process	GO:0012501	programmed cell death	0.342367475683569	0.615533014792799	3	68
GO:0021700 developmental maturation	3	0.342367475683569	0.22	0.044	Biological Process	GO:0021700	developmental maturation	0.342367475683569	0.615533014792799	3	68
GO:0008081 phosphoric diester hydrolase activity	5	0.342724951003834	0.277	0.036	Molecular Function	GO:0008081	phosphoric diester hydrolase activity	0.342724951003834	0.684997104374595	5	139
GO:0004623 phospholipase A2 activity	1	0.344336648173991	0.055	0.067	Molecular Function	GO:0004623	phospholipase A2 activity	0.344336648173991	0.684997104374595	1	15
GO:0008172 S-methyltransferase activity	1	0.344336648173991	0.055	0.067	Molecular Function	GO:0008172	S-methyltransferase activity	0.344336648173991	0.684997104374595	1	15
GO:0047938 glucose-6-phosphate 1-epimerase activity	1	0.344336648173991	0.055	0.067	Molecular Function	GO:0047938	glucose-6-phosphate 1-epimerase activity	0.344336648173991	0.684997104374595	1	15
GO:0048588 developmental cell growth	2	0.344829801335068	0.147	0.05	Biological Process	GO:0048588	developmental cell growth	0.344829801335068	0.619136641972127	2	40
GO:0042371 vitamin K biosynthetic process	1	0.351260784163864	0.073	0.071	Biological Process	GO:0042371	vitamin K biosynthetic process	0.351260784163864	0.624874447617821	1	14
GO:0042372 phylloquinone biosynthetic process	1	0.351260784163864	0.073	0.071	Biological Process	GO:0042372	phylloquinone biosynthetic process	0.351260784163864	0.624874447617821	1	14
GO:0042373 vitamin K metabolic process	1	0.351260784163864	0.073	0.071	Biological Process	GO:0042373	vitamin K metabolic process	0.351260784163864	0.624874447617821	1	14
GO:0042374 phylloquinone metabolic process	1	0.351260784163864	0.073	0.071	Biological Process	GO:0042374	phylloquinone metabolic process	0.351260784163864	0.624874447617821	1	14
GO:0046168 glycerol-3-phosphate catabolic process	1	0.351260784163864	0.073	0.071	Biological Process	GO:0046168	glycerol-3-phosphate catabolic process	0.351260784163864	0.624874447617821	1	14
GO:0080163 regulation of protein serine/threonine phosphatase activity	1	0.351260784163864	0.073	0.071	Biological Process	GO:0080163	regulation of protein serine/threonine phosphatase activity	0.351260784163864	0.624874447617821	1	14
GO:1905897 regulation of response to endoplasmic reticulum stress	1	0.351260784163864	0.073	0.071	Biological Process	GO:1905897	regulation of response to endoplasmic reticulum stress	0.351260784163864	0.624874447617821	1	14
GO:0010181 FMN binding	5	0.353711441348534	0.277	0.035	Molecular Function	GO:0010181	FMN binding	0.353711441348534	0.700347430316904	5	141
GO:0031668 cellular response to extracellular stimulus	4	0.355643548624275	0.294	0.04	Biological Process	GO:0031668	cellular response to extracellular stimulus	0.355643548624275	0.63019796459111	4	99
GO:0071496 cellular response to external stimulus	4	0.355643548624275	0.294	0.04	Biological Process	GO:0071496	cellular response to external stimulus	0.355643548624275	0.63019796459111	4	99
GO:0010628 positive regulation of gene expression	2	0.355934126279276	0.147	0.049	Biological Process	GO:0010628	positive regulation of gene expression	0.355934126279276	0.63019796459111	2	41
GO:0016615 malate dehydrogenase activity	2	0.356109693569578	0.111	0.044	Molecular Function	GO:0016615	malate dehydrogenase activity	0.356109693569578	0.700347430316904	2	45
GO:0019538 protein metabolic process	400	0.356117784724562	29.369	0.031	Biological Process	GO:0019538	protein metabolic process	0.356117784724562	0.63019796459111	400	12930
GO:0004866 endopeptidase inhibitor activity	18	0.358317289929579	0.999	0.031	Molecular Function	GO:0004866	endopeptidase inhibitor activity	0.358317289929579	0.700347430316904	18	584
GO:0030414 peptidase inhibitor activity	18	0.358317289929579	0.999	0.031	Molecular Function	GO:0030414	peptidase inhibitor activity	0.358317289929579	0.700347430316904	18	584
GO:0061135 endopeptidase regulator activity	18	0.358317289929579	0.999	0.031	Molecular Function	GO:0061135	endopeptidase regulator activity	0.358317289929579	0.700347430316904	18	584
GO:0048046 apoplast	18	0.359607061805818	1.77	0.034	Cellular Component	GO:0048046	apoplast	0.359607061805818	1	18	533
GO:1901575 organic substance catabolic process	79	0.360646230780033	5.8	0.032	Biological Process	GO:1901575	organic substance catabolic process	0.360646230780033	0.637377390868765	79	2486
GO:0046910 pectinesterase inhibitor activity	1	0.36253240934305	0.055	0.062	Molecular Function	GO:0046910	pectinesterase inhibitor activity	0.36253240934305	0.706117131786637	1	16
GO:0005911 cell-cell junction	10	0.364694252480654	0.983	0.035	Cellular Component	GO:0005911	cell-cell junction	0.364694252480654	1	10	284
GO:0009506 plasmodesma	10	0.364694252480654	0.983	0.035	Cellular Component	GO:0009506	plasmodesma	0.364694252480654	1	10	284
GO:0030054 cell junction	10	0.364694252480654	0.983	0.035	Cellular Component	GO:0030054	cell junction	0.364694252480654	1	10	284
GO:0055044 symplast	10	0.364694252480654	0.983	0.035	Cellular Component	GO:0055044	symplast	0.364694252480654	1	10	284
GO:0070161 anchoring junction	10	0.364694252480654	0.983	0.035	Cellular Component	GO:0070161	anchoring junction	0.364694252480654	1	10	284
GO:0061134 peptidase regulator activity	18	0.366334820823674	0.999	0.031	Molecular Function	GO:0061134	peptidase regulator activity	0.366334820823674	0.711045711251506	18	587
GO:0016109 tetraterpenoid biosynthetic process	2	0.366969879564639	0.147	0.048	Biological Process	GO:0016109	tetraterpenoid biosynthetic process	0.366969879564639	0.643908105189549	2	42
GO:0016117 carotenoid biosynthetic process	2	0.366969879564639	0.147	0.048	Biological Process	GO:0016117	carotenoid biosynthetic process	0.366969879564639	0.643908105189549	2	42
GO:0005887 integral component of plasma membrane	2	0.366999820952431	0.197	0.048	Cellular Component	GO:0005887	integral component of plasma membrane	0.366999820952431	1	2	42
GO:0003682 chromatin binding	6	0.368150169963923	0.333	0.034	Molecular Function	GO:0003682	chromatin binding	0.368150169963923	0.712096695535754	6	177
GO:0019751 polyol metabolic process	5	0.368465836798687	0.367	0.038	Biological Process	GO:0019751	polyol metabolic process	0.368465836798687	0.643908105189549	5	131
GO:0008080 N-acetyltransferase activity	4	0.370872147928632	0.222	0.036	Molecular Function	GO:0008080	N-acetyltransferase activity	0.370872147928632	0.714888036869329	4	111
GO:0006750 glutathione biosynthetic process	1	0.37100918191025	0.073	0.067	Biological Process	GO:0006750	glutathione biosynthetic process	0.37100918191025	0.643908105189549	1	15
GO:0010051 xylem and phloem pattern formation	1	0.37100918191025	0.073	0.067	Biological Process	GO:0010051	xylem and phloem pattern formation	0.37100918191025	0.643908105189549	1	15
GO:0015909 long-chain fatty acid transport	1	0.37100918191025	0.073	0.067	Biological Process	GO:0015909	long-chain fatty acid transport	0.37100918191025	0.643908105189549	1	15
GO:0032309 icosanoid secretion	1	0.37100918191025	0.073	0.067	Biological Process	GO:0032309	icosanoid secretion	0.37100918191025	0.643908105189549	1	15
GO:0046283 anthocyanin-containing compound metabolic process	1	0.37100918191025	0.073	0.067	Biological Process	GO:0046283	anthocyanin-containing compound metabolic process	0.37100918191025	0.643908105189549	1	15
GO:0048639 positive regulation of developmental growth	1	0.37100918191025	0.073	0.067	Biological Process	GO:0048639	positive regulation of developmental growth	0.37100918191025	0.643908105189549	1	15
GO:0050482 arachidonic acid secretion	1	0.37100918191025	0.073	0.067	Biological Process	GO:0050482	arachidonic acid secretion	0.37100918191025	0.643908105189549	1	15
GO:0070417 cellular response to cold	1	0.37100918191025	0.073	0.067	Biological Process	GO:0070417	cellular response to cold	0.37100918191025	0.643908105189549	1	15
GO:0071715 icosanoid transport	1	0.37100918191025	0.073	0.067	Biological Process	GO:0071715	icosanoid transport	0.37100918191025	0.643908105189549	1	15
GO:1903963 arachidonate transport	1	0.37100918191025	0.073	0.067	Biological Process	GO:1903963	arachidonate transport	0.37100918191025	0.643908105189549	1	15
GO:2000762 regulation of phenylpropanoid metabolic process	1	0.37100918191025	0.073	0.067	Biological Process	GO:2000762	regulation of phenylpropanoid metabolic process	0.37100918191025	0.643908105189549	1	15
GO:0012511 monolayer-surrounded lipid storage body	1	0.371034899058851	0.098	0.067	Cellular Component	GO:0012511	monolayer-surrounded lipid storage body	0.371034899058851	1	1	15
GO:0000175 3'-5'-exoribonuclease activity	2	0.376144455721054	0.111	0.043	Molecular Function	GO:0000175	3'-5'-exoribonuclease activity	0.376144455721054	0.722559280921199	2	47
GO:0006012 galactose metabolic process	2	0.377930952493843	0.147	0.047	Biological Process	GO:0006012	galactose metabolic process	0.377930952493843	0.655080317655995	2	43
GO:0004618 phosphoglycerate kinase activity	1	0.380223479976386	0.055	0.059	Molecular Function	GO:0004618	phosphoglycerate kinase activity	0.380223479976386	0.727893579817808	1	17
GO:0090558 plant epidermis development	5	0.380558776388242	0.367	0.038	Biological Process	GO:0090558	plant epidermis development	0.380558776388242	0.658790609061335	5	133
GO:0009225 nucleotide-sugar metabolic process	3	0.383994696522866	0.22	0.041	Biological Process	GO:0009225	nucleotide-sugar metabolic process	0.383994696522866	0.663512014360179	3	73
GO:0140115 export across plasma membrane	9	0.386308146947899	0.661	0.035	Biological Process	GO:0140115	export across plasma membrane	0.386308146947899	0.663512014360179	9	258
GO:0000096 sulfur amino acid metabolic process	5	0.38660282464634	0.367	0.037	Biological Process	GO:0000096	sulfur amino acid metabolic process	0.38660282464634	0.663512014360179	5	134
GO:0006535 cysteine biosynthetic process from serine	2	0.388811671093893	0.147	0.045	Biological Process	GO:0006535	cysteine biosynthetic process from serine	0.388811671093893	0.663512014360179	2	44
GO:0010287 plastoglobule	2	0.388846230673166	0.197	0.045	Cellular Component	GO:0010287	plastoglobule	0.388846230673166	1	2	44
GO:0006450 regulation of translational fidelity	1	0.390156842763567	0.073	0.062	Biological Process	GO:0006450	regulation of translational fidelity	0.390156842763567	0.663512014360179	1	16
GO:0010099 regulation of photomorphogenesis	1	0.390156842763567	0.073	0.062	Biological Process	GO:0010099	regulation of photomorphogenesis	0.390156842763567	0.663512014360179	1	16
GO:0010105 negative regulation of ethylene-activated signaling pathway	1	0.390156842763567	0.073	0.062	Biological Process	GO:0010105	negative regulation of ethylene-activated signaling pathway	0.390156842763567	0.663512014360179	1	16
GO:0010114 response to red light	1	0.390156842763567	0.073	0.062	Biological Process	GO:0010114	response to red light	0.390156842763567	0.663512014360179	1	16
GO:0015706 nitrate transport	1	0.390156842763567	0.073	0.062	Biological Process	GO:0015706	nitrate transport	0.390156842763567	0.663512014360179	1	16
GO:0019184 nonribosomal peptide biosynthetic process	1	0.390156842763567	0.073	0.062	Biological Process	GO:0019184	nonribosomal peptide biosynthetic process	0.390156842763567	0.663512014360179	1	16
GO:0035510 DNA dealkylation	1	0.390156842763567	0.073	0.062	Biological Process	GO:0035510	DNA dealkylation	0.390156842763567	0.663512014360179	1	16
GO:0070298 negative regulation of phosphorelay signal transduction system	1	0.390156842763567	0.073	0.062	Biological Process	GO:0070298	negative regulation of phosphorelay signal transduction system	0.390156842763567	0.663512014360179	1	16
GO:0080111 DNA demethylation	1	0.390156842763567	0.073	0.062	Biological Process	GO:0080111	DNA demethylation	0.390156842763567	0.663512014360179	1	16
GO:2000142 regulation of DNA-templated transcription, initiation	1	0.390156842763567	0.073	0.062	Biological Process	GO:2000142	regulation of DNA-templated transcription, initiation	0.390156842763567	0.663512014360179	1	16
GO:0098562 cytoplasmic side of membrane	1	0.39018460141065	0.098	0.062	Cellular Component	GO:0098562	cytoplasmic side of membrane	0.39018460141065	1	1	16
GO:0006576 cellular biogenic amine metabolic process	6	0.393236949514926	0.441	0.036	Biological Process	GO:0006576	cellular biogenic amine metabolic process	0.393236949514926	0.667909994653493	6	166
GO:0045491 xylan metabolic process	4	0.397143846822455	0.294	0.038	Biological Process	GO:0045491	xylan metabolic process	0.397143846822455	0.673699474158041	4	105
GO:0034593 phosphatidylinositol bisphosphate phosphatase activity	1	0.397423850971482	0.055	0.056	Molecular Function	GO:0034593	phosphatidylinositol bisphosphate phosphatase activity	0.397423850971482	0.755646029568226	1	18
GO:0034595 phosphatidylinositol phosphate 5-phosphatase activity	1	0.397423850971482	0.055	0.056	Molecular Function	GO:0034595	phosphatidylinositol phosphate 5-phosphatase activity	0.397423850971482	0.755646029568226	1	18
GO:0006334 nucleosome assembly	9	0.399277686204061	0.661	0.034	Biological Process	GO:0006334	nucleosome assembly	0.399277686204061	0.676180676183665	9	261
GO:0016036 cellular response to phosphate starvation	2	0.399606775348187	0.147	0.044	Biological Process	GO:0016036	cellular response to phosphate starvation	0.399606775348187	0.676180676183665	2	45
GO:1905393 plant organ formation	3	0.400488724596845	0.22	0.04	Biological Process	GO:1905393	plant organ formation	0.400488724596845	0.676825944568668	3	75
GO:0005249 voltage-gated potassium channel activity	2	0.405693013509944	0.111	0.04	Molecular Function	GO:0005249	voltage-gated potassium channel activity	0.405693013509944	0.765684870578228	2	50
GO:0016881 acid-amino acid ligase activity	2	0.405693013509944	0.111	0.04	Molecular Function	GO:0016881	acid-amino acid ligase activity	0.405693013509944	0.765684870578228	2	50
GO:0042626 ATPase-coupled transmembrane transporter activity	18	0.406812891881456	0.999	0.03	Molecular Function	GO:0042626	ATPase-coupled transmembrane transporter activity	0.406812891881456	0.765684870578228	18	602
GO:0005694 chromosome	32	0.408432169640562	3.147	0.032	Cellular Component	GO:0005694	chromosome	0.408432169640562	1	32	999
GO:0016763 pentosyltransferase activity	4	0.408553170556507	0.222	0.034	Molecular Function	GO:0016763	pentosyltransferase activity	0.408553170556507	0.766379940741905	4	117
GO:0006515 protein quality control for misfolded or incompletely synthesized proteins	1	0.408722027836343	0.073	0.059	Biological Process	GO:0006515	protein quality control for misfolded or incompletely synthesized proteins	0.408722027836343	0.687303708500915	1	17
GO:0030968 endoplasmic reticulum unfolded protein response	1	0.408722027836343	0.073	0.059	Biological Process	GO:0030968	endoplasmic reticulum unfolded protein response	0.408722027836343	0.687303708500915	1	17
GO:0046621 negative regulation of organ growth	1	0.408722027836343	0.073	0.059	Biological Process	GO:0046621	negative regulation of organ growth	0.408722027836343	0.687303708500915	1	17
GO:0048640 negative regulation of developmental growth	1	0.408722027836343	0.073	0.059	Biological Process	GO:0048640	negative regulation of developmental growth	0.408722027836343	0.687303708500915	1	17
GO:0005795 Golgi stack	1	0.408751820749773	0.098	0.059	Cellular Component	GO:0005795	Golgi stack	0.408751820749773	1	1	17
GO:0009331 glycerol-3-phosphate dehydrogenase complex	1	0.408751820749773	0.098	0.059	Cellular Component	GO:0009331	glycerol-3-phosphate dehydrogenase complex	0.408751820749773	1	1	17
GO:0048437 floral organ development	4	0.410893898103661	0.294	0.037	Biological Process	GO:0048437	floral organ development	0.410893898103661	0.690097577933106	4	107
GO:0044106 cellular amine metabolic process	6	0.414939793171973	0.441	0.035	Biological Process	GO:0044106	cellular amine metabolic process	0.414939793171973	0.696028040159438	6	170
GO:0034728 nucleosome organization	9	0.416583204723563	0.661	0.034	Biological Process	GO:0034728	nucleosome organization	0.416583204723563	0.697918826253108	9	265
GO:0043933 protein-containing complex subunit organization	38	0.41783239535669	2.79	0.032	Biological Process	GO:0043933	protein-containing complex subunit organization	0.41783239535669	0.699145295200798	38	1197
GO:0051346 negative regulation of hydrolase activity	6	0.420353969839203	0.441	0.035	Biological Process	GO:0051346	negative regulation of hydrolase activity	0.420353969839203	0.702495138717679	6	171
GO:0016857 racemase and epimerase activity, acting on carbohydrates and derivatives	3	0.420749692926617	0.166	0.035	Molecular Function	GO:0016857	racemase and epimerase activity, acting on carbohydrates and derivatives	0.420749692926617	0.786618991123676	3	85
GO:0009523 photosystem II	12	0.422730595698121	1.18	0.033	Cellular Component	GO:0009523	photosystem II	0.422730595698121	1	12	362
GO:0008154 actin polymerization or depolymerization	4	0.424576799939106	0.294	0.037	Biological Process	GO:0008154	actin polymerization or depolymerization	0.424576799939106	0.705291862669551	4	109
GO:0004725 protein tyrosine phosphatase activity	2	0.425012414421361	0.111	0.038	Molecular Function	GO:0004725	protein tyrosine phosphatase activity	0.425012414421361	0.791939798871802	2	52
GO:0001666 response to hypoxia	1	0.426722443538234	0.073	0.056	Biological Process	GO:0001666	response to hypoxia	0.426722443538234	0.705291862669551	1	18
GO:0006071 glycerol metabolic process	1	0.426722443538234	0.073	0.056	Biological Process	GO:0006071	glycerol metabolic process	0.426722443538234	0.705291862669551	1	18
GO:0010104 regulation of ethylene-activated signaling pathway	1	0.426722443538234	0.073	0.056	Biological Process	GO:0010104	regulation of ethylene-activated signaling pathway	0.426722443538234	0.705291862669551	1	18
GO:0018108 peptidyl-tyrosine phosphorylation	1	0.426722443538234	0.073	0.056	Biological Process	GO:0018108	peptidyl-tyrosine phosphorylation	0.426722443538234	0.705291862669551	1	18
GO:0018212 peptidyl-tyrosine modification	1	0.426722443538234	0.073	0.056	Biological Process	GO:0018212	peptidyl-tyrosine modification	0.426722443538234	0.705291862669551	1	18
GO:0019400 alditol metabolic process	1	0.426722443538234	0.073	0.056	Biological Process	GO:0019400	alditol metabolic process	0.426722443538234	0.705291862669551	1	18
GO:0048444 floral organ morphogenesis	1	0.426722443538234	0.073	0.056	Biological Process	GO:0048444	floral organ morphogenesis	0.426722443538234	0.705291862669551	1	18
GO:0070297 regulation of phosphorelay signal transduction system	1	0.426722443538234	0.073	0.056	Biological Process	GO:0070297	regulation of phosphorelay signal transduction system	0.426722443538234	0.705291862669551	1	18
GO:0000808 origin recognition complex	1	0.426754257751584	0.098	0.056	Cellular Component	GO:0000808	origin recognition complex	0.426754257751584	1	1	18
GO:0008252 nucleotidase activity	1	0.430406530159111	0.055	0.05	Molecular Function	GO:0008252	nucleotidase activity	0.430406530159111	0.794050331217633	1	20
GO:0052866 phosphatidylinositol phosphate phosphatase activity	1	0.430406530159111	0.055	0.05	Molecular Function	GO:0052866	phosphatidylinositol phosphate phosphatase activity	0.430406530159111	0.794050331217633	1	20
GO:0120013 lipid transfer activity	1	0.430406530159111	0.055	0.05	Molecular Function	GO:0120013	lipid transfer activity	0.430406530159111	0.794050331217633	1	20
GO:0007140 male meiotic nuclear division	2	0.431431598903865	0.147	0.042	Biological Process	GO:0007140	male meiotic nuclear division	0.431431598903865	0.711336002095153	2	48
GO:0019344 cysteine biosynthetic process	2	0.431431598903865	0.147	0.042	Biological Process	GO:0019344	cysteine biosynthetic process	0.431431598903865	0.711336002095153	2	48
GO:0042440 pigment metabolic process	7	0.432604334038009	0.514	0.034	Biological Process	GO:0042440	pigment metabolic process	0.432604334038009	0.711693686539961	7	205
GO:0048367 shoot system development	20	0.432701339005804	1.468	0.032	Biological Process	GO:0048367	shoot system development	0.432701339005804	0.711693686539961	20	622
GO:0031497 chromatin assembly	9	0.438189153365585	0.661	0.033	Biological Process	GO:0031497	chromatin assembly	0.438189153365585	0.719844149878822	9	270
GO:0034285 response to disaccharide	2	0.441839245098178	0.147	0.041	Biological Process	GO:0034285	response to disaccharide	0.441839245098178	0.72495953807371	2	49
GO:0032451 demethylase activity	2	0.443998336002366	0.111	0.037	Molecular Function	GO:0032451	demethylase activity	0.443998336002366	0.812489064617536	2	54
GO:0009809 lignin biosynthetic process	1	0.444175258413752	0.073	0.053	Biological Process	GO:0009809	lignin biosynthetic process	0.444175258413752	0.727909029545931	1	19
GO:0010319 stromule	1	0.444209075711663	0.098	0.053	Cellular Component	GO:0010319	stromule	0.444209075711663	1	1	19
GO:0090406 pollen tube	1	0.444209075711663	0.098	0.053	Cellular Component	GO:0090406	pollen tube	0.444209075711663	1	1	19
GO:0034976 response to endoplasmic reticulum stress	4	0.44494458669386	0.294	0.036	Biological Process	GO:0034976	response to endoplasmic reticulum stress	0.44494458669386	0.728287023256778	4	112
GO:0042592 homeostatic process	21	0.445829331289536	1.542	0.032	Biological Process	GO:0042592	homeostatic process	0.445829331289536	0.728852788275034	21	659
GO:0004351 glutamate decarboxylase activity	1	0.446214924575284	0.055	0.048	Molecular Function	GO:0004351	glutamate decarboxylase activity	0.446214924575284	0.812489064617536	1	21
GO:0016653 oxidoreductase activity, acting on NAD(P)H, heme protein as acceptor	1	0.446214924575284	0.055	0.048	Molecular Function	GO:0016653	oxidoreductase activity, acting on NAD(P)H, heme protein as acceptor	0.446214924575284	0.812489064617536	1	21
GO:0140030 modification-dependent protein binding	1	0.446214924575284	0.055	0.048	Molecular Function	GO:0140030	modification-dependent protein binding	0.446214924575284	0.812489064617536	1	21
GO:1901564 organonitrogen compound metabolic process	475	0.448304219286147	34.875	0.031	Biological Process	GO:1901564	organonitrogen compound metabolic process	0.448304219286147	0.732013652747429	475	15520
GO:0004252 serine-type endopeptidase activity	14	0.450060485153648	0.777	0.029	Molecular Function	GO:0004252	serine-type endopeptidase activity	0.450060485153648	0.816235412974265	14	476
GO:0016836 hydro-lyase activity	7	0.45119274169776	0.388	0.031	Molecular Function	GO:0016836	hydro-lyase activity	0.45119274169776	0.816235412974265	7	229
GO:0006333 chromatin assembly or disassembly	9	0.455414180887931	0.661	0.033	Biological Process	GO:0006333	chromatin assembly or disassembly	0.455414180887931	0.742726143016264	9	274
GO:0019200 carbohydrate kinase activity	3	0.457313029111151	0.166	0.033	Molecular Function	GO:0019200	carbohydrate kinase activity	0.457313029111151	0.824638655719785	3	90
GO:0009416 response to light stimulus	14	0.460397916407176	1.028	0.032	Biological Process	GO:0009416	response to light stimulus	0.460397916407176	0.749949377087352	14	437
GO:0120009 intermembrane lipid transfer	1	0.461097119469265	0.073	0.05	Biological Process	GO:0120009	intermembrane lipid transfer	0.461097119469265	0.750184483179838	1	20
GO:0098552 side of membrane	1	0.461132916844668	0.098	0.05	Cellular Component	GO:0098552	side of membrane	0.461132916844668	1	1	20
GO:0009705 plant-type vacuole membrane	2	0.462383577966153	0.197	0.039	Cellular Component	GO:0009705	plant-type vacuole membrane	0.462383577966153	1	2	51
GO:0022843 voltage-gated cation channel activity	2	0.462629416894763	0.111	0.036	Molecular Function	GO:0022843	voltage-gated cation channel activity	0.462629416894763	0.831542906894445	2	56
GO:0048878 chemical homeostasis	11	0.468781361452893	0.808	0.032	Biological Process	GO:0048878	chemical homeostasis	0.468781361452893	0.761769712360951	11	342
GO:0005267 potassium channel activity	2	0.471806136521349	0.111	0.035	Molecular Function	GO:0005267	potassium channel activity	0.471806136521349	0.845319327934084	2	57
GO:0048438 floral whorl development	3	0.472839672974628	0.22	0.036	Biological Process	GO:0048438	floral whorl development	0.472839672974628	0.766728782829458	3	84
GO:0004575 sucrose alpha-glucosidase activity	1	0.47652835069282	0.055	0.043	Molecular Function	GO:0004575	sucrose alpha-glucosidase activity	0.47652835069282	0.848341872730211	1	23
GO:0090599 alpha-glucosidase activity	1	0.47652835069282	0.055	0.043	Molecular Function	GO:0090599	alpha-glucosidase activity	0.47652835069282	0.848341872730211	1	23
GO:0006072 glycerol-3-phosphate metabolic process	1	0.477504168004736	0.073	0.048	Biological Process	GO:0006072	glycerol-3-phosphate metabolic process	0.477504168004736	0.766728782829458	1	21
GO:0006775 fat-soluble vitamin metabolic process	1	0.477504168004736	0.073	0.048	Biological Process	GO:0006775	fat-soluble vitamin metabolic process	0.477504168004736	0.766728782829458	1	21
GO:0015908 fatty acid transport	1	0.477504168004736	0.073	0.048	Biological Process	GO:0015908	fatty acid transport	0.477504168004736	0.766728782829458	1	21
GO:0042362 fat-soluble vitamin biosynthetic process	1	0.477504168004736	0.073	0.048	Biological Process	GO:0042362	fat-soluble vitamin biosynthetic process	0.477504168004736	0.766728782829458	1	21
GO:0051084 'de novo' posttranslational protein folding	1	0.477504168004736	0.073	0.048	Biological Process	GO:0051084	'de novo' posttranslational protein folding	0.477504168004736	0.766728782829458	1	21
GO:0051085 chaperone cofactor-dependent protein refolding	1	0.477504168004736	0.073	0.048	Biological Process	GO:0051085	chaperone cofactor-dependent protein refolding	0.477504168004736	0.766728782829458	1	21
GO:0052646 alditol phosphate metabolic process	1	0.477504168004736	0.073	0.048	Biological Process	GO:0052646	alditol phosphate metabolic process	0.477504168004736	0.766728782829458	1	21
GO:1902584 positive regulation of response to water deprivation	1	0.477504168004736	0.073	0.048	Biological Process	GO:1902584	positive regulation of response to water deprivation	0.477504168004736	0.766728782829458	1	21
GO:2000030 regulation of response to red or far red light	1	0.477504168004736	0.073	0.048	Biological Process	GO:2000030	regulation of response to red or far red light	0.477504168004736	0.766728782829458	1	21
GO:0005849 mRNA cleavage factor complex	1	0.477541918089322	0.098	0.048	Cellular Component	GO:0005849	mRNA cleavage factor complex	0.477541918089322	1	1	21
GO:0120025 plasma membrane bounded cell projection	1	0.477541918089322	0.098	0.048	Cellular Component	GO:0120025	plasma membrane bounded cell projection	0.477541918089322	1	1	21
GO:0019318 hexose metabolic process	8	0.479160883481703	0.587	0.032	Biological Process	GO:0019318	hexose metabolic process	0.479160883481703	0.768476292369232	8	247
GO:0006596 polyamine biosynthetic process	2	0.482375868767465	0.147	0.038	Biological Process	GO:0006596	polyamine biosynthetic process	0.482375868767465	0.771801390027944	2	53
GO:0051240 positive regulation of multicellular organismal process	2	0.482375868767465	0.147	0.038	Biological Process	GO:0051240	positive regulation of multicellular organismal process	0.482375868767465	0.771801390027944	2	53
GO:0031226 intrinsic component of plasma membrane	2	0.482432027293648	0.197	0.038	Cellular Component	GO:0031226	intrinsic component of plasma membrane	0.482432027293648	1	2	53
GO:0010466 negative regulation of peptidase activity	5	0.487768894317409	0.367	0.033	Biological Process	GO:0010466	negative regulation of peptidase activity	0.487768894317409	0.776753292246334	5	151
GO:0010951 negative regulation of endopeptidase activity	5	0.487768894317409	0.367	0.033	Biological Process	GO:0010951	negative regulation of endopeptidase activity	0.487768894317409	0.776753292246334	5	151
GO:0052547 regulation of peptidase activity	5	0.487768894317409	0.367	0.033	Biological Process	GO:0052547	regulation of peptidase activity	0.487768894317409	0.776753292246334	5	151
GO:0052548 regulation of endopeptidase activity	5	0.487768894317409	0.367	0.033	Biological Process	GO:0052548	regulation of endopeptidase activity	0.487768894317409	0.776753292246334	5	151
GO:0031406 carboxylic acid binding	4	0.488182134009587	0.222	0.031	Molecular Function	GO:0031406	carboxylic acid binding	0.488182134009587	0.86321089337032	4	130
GO:0033554 cellular response to stress	32	0.488820191781895	2.349	0.031	Biological Process	GO:0033554	cellular response to stress	0.488820191781895	0.777380887702367	32	1035
GO:0065008 regulation of biological quality	33	0.48931296999609	2.423	0.031	Biological Process	GO:0065008	regulation of biological quality	0.48931296999609	0.777380887702367	33	1068
GO:0004532 exoribonuclease activity	2	0.489872112913815	0.111	0.034	Molecular Function	GO:0004532	exoribonuclease activity	0.489872112913815	0.86321089337032	2	59
GO:0016896 exoribonuclease activity, producing 5'-phosphomonoesters	2	0.489872112913815	0.111	0.034	Molecular Function	GO:0016896	exoribonuclease activity, producing 5'-phosphomonoesters	0.489872112913815	0.86321089337032	2	59
GO:0004040 amidase activity	1	0.491057359734815	0.055	0.042	Molecular Function	GO:0004040	amidase activity	0.491057359734815	0.86321089337032	1	24
GO:0055067 monovalent inorganic cation homeostasis	2	0.492222817857517	0.147	0.037	Biological Process	GO:0055067	monovalent inorganic cation homeostasis	0.492222817857517	0.781085973877187	2	54
GO:0045926 negative regulation of growth	1	0.493412054965227	0.073	0.045	Biological Process	GO:0045926	negative regulation of growth	0.493412054965227	0.781373124920193	1	22
GO:0005682 U5 snRNP	1	0.493451726434478	0.098	0.045	Cellular Component	GO:0005682	U5 snRNP	0.493451726434478	1	1	22
GO:0045861 negative regulation of proteolysis	5	0.493559651391897	0.367	0.033	Biological Process	GO:0045861	negative regulation of proteolysis	0.493559651391897	0.781373124920193	5	152
GO:0045454 cell redox homeostasis	10	0.494759329905305	0.734	0.032	Biological Process	GO:0045454	cell redox homeostasis	0.494759329905305	0.782356273721605	10	316
GO:0016667 oxidoreductase activity, acting on a sulfur group of donors	9	0.49977573102757	0.499	0.029	Molecular Function	GO:0016667	oxidoreductase activity, acting on a sulfur group of donors	0.49977573102757	0.870825539448974	9	312
GO:0019901 protein kinase binding	4	0.500062608520788	0.222	0.03	Molecular Function	GO:0019901	protein kinase binding	0.500062608520788	0.870825539448974	4	132
GO:0051015 actin filament binding	4	0.500062608520788	0.222	0.03	Molecular Function	GO:0051015	actin filament binding	0.500062608520788	0.870825539448974	4	132
GO:0006595 polyamine metabolic process	2	0.501950325403463	0.147	0.036	Biological Process	GO:0006595	polyamine metabolic process	0.501950325403463	0.792800046665282	2	55
GO:0009073 aromatic amino acid family biosynthetic process	3	0.50370866118372	0.22	0.034	Biological Process	GO:0009073	aromatic amino acid family biosynthetic process	0.50370866118372	0.79464890305763	3	88
GO:0051493 regulation of cytoskeleton organization	4	0.504527954054365	0.294	0.033	Biological Process	GO:0051493	regulation of cytoskeleton organization	0.504527954054365	0.795013745782636	4	121
GO:0008198 ferrous iron binding	1	0.505183332221998	0.055	0.04	Molecular Function	GO:0008198	ferrous iron binding	0.505183332221998	0.876641306101052	1	25
GO:0016042 lipid catabolic process	8	0.506162935530296	0.587	0.032	Biological Process	GO:0016042	lipid catabolic process	0.506162935530296	0.796661570240931	8	253
GO:0008138 protein tyrosine/serine/threonine phosphatase activity	2	0.507543777939085	0.111	0.033	Molecular Function	GO:0008138	protein tyrosine/serine/threonine phosphatase activity	0.507543777939085	0.876641306101052	2	61
GO:0019253 reductive pentose-phosphate cycle	1	0.508835955826705	0.073	0.043	Biological Process	GO:0019253	reductive pentose-phosphate cycle	0.508835955826705	0.798081452758359	1	23
GO:0019685 photosynthesis, dark reaction	1	0.508835955826705	0.073	0.043	Biological Process	GO:0019685	photosynthesis, dark reaction	0.508835955826705	0.798081452758359	1	23
GO:0051260 protein homooligomerization	1	0.508835955826705	0.073	0.043	Biological Process	GO:0051260	protein homooligomerization	0.508835955826705	0.798081452758359	1	23
GO:0004867 serine-type endopeptidase inhibitor activity	13	0.508939023084481	0.721	0.028	Molecular Function	GO:0004867	serine-type endopeptidase inhibitor activity	0.508939023084481	0.876641306101052	13	459
GO:0030170 pyridoxal phosphate binding	9	0.511243409282545	0.499	0.029	Molecular Function	GO:0030170	pyridoxal phosphate binding	0.511243409282545	0.876641306101052	9	315
GO:0070279 vitamin B6 binding	9	0.511243409282545	0.499	0.029	Molecular Function	GO:0070279	vitamin B6 binding	0.511243409282545	0.876641306101052	9	315
GO:0000079 regulation of cyclin-dependent protein serine/threonine kinase activity	2	0.511556538020374	0.147	0.036	Biological Process	GO:0000079	regulation of cyclin-dependent protein serine/threonine kinase activity	0.511556538020374	0.80049124930966	2	56
GO:1904029 regulation of cyclin-dependent protein kinase activity	2	0.511556538020374	0.147	0.036	Biological Process	GO:1904029	regulation of cyclin-dependent protein kinase activity	0.511556538020374	0.80049124930966	2	56
GO:0009314 response to radiation	14	0.514384904859703	1.028	0.031	Biological Process	GO:0009314	response to radiation	0.514384904859703	0.803986579618865	14	453
GO:0009505 plant-type cell wall	3	0.518871709563663	0.295	0.033	Cellular Component	GO:0009505	plant-type cell wall	0.518871709563663	1	3	90
GO:0102726 DIMBOA glucoside beta-D-glucosidase activity	1	0.518917442403844	0.055	0.038	Molecular Function	GO:0102726	DIMBOA glucoside beta-D-glucosidase activity	0.518917442403844	0.887079052916663	1	26
GO:0009967 positive regulation of signal transduction	2	0.521039825500444	0.147	0.035	Biological Process	GO:0009967	positive regulation of signal transduction	0.521039825500444	0.808778236597704	2	57
GO:0016108 tetraterpenoid metabolic process	2	0.521039825500444	0.147	0.035	Biological Process	GO:0016108	tetraterpenoid metabolic process	0.521039825500444	0.808778236597704	2	57
GO:0016116 carotenoid metabolic process	2	0.521039825500444	0.147	0.035	Biological Process	GO:0016116	carotenoid metabolic process	0.521039825500444	0.808778236597704	2	57
GO:0023056 positive regulation of signaling	2	0.521039825500444	0.147	0.035	Biological Process	GO:0023056	positive regulation of signaling	0.521039825500444	0.808778236597704	2	57
GO:0042398 cellular modified amino acid biosynthetic process	2	0.521039825500444	0.147	0.035	Biological Process	GO:0042398	cellular modified amino acid biosynthetic process	0.521039825500444	0.808778236597704	2	57
GO:0051052 regulation of DNA metabolic process	2	0.521039825500444	0.147	0.035	Biological Process	GO:0051052	regulation of DNA metabolic process	0.521039825500444	0.808778236597704	2	57
GO:1901607 alpha-amino acid biosynthetic process	10	0.522561567590042	0.734	0.031	Biological Process	GO:1901607	alpha-amino acid biosynthetic process	0.522561567590042	0.808883522767214	10	323
GO:0016129 phytosteroid biosynthetic process	1	0.523790585030291	0.073	0.042	Biological Process	GO:0016129	phytosteroid biosynthetic process	0.523790585030291	0.808883522767214	1	24
GO:1902532 negative regulation of intracellular signal transduction	1	0.523790585030291	0.073	0.042	Biological Process	GO:1902532	negative regulation of intracellular signal transduction	0.523790585030291	0.808883522767214	1	24
GO:1902652 secondary alcohol metabolic process	1	0.523790585030291	0.073	0.042	Biological Process	GO:1902652	secondary alcohol metabolic process	0.523790585030291	0.808883522767214	1	24
GO:0006812 cation transport	37	0.524099087236745	2.717	0.03	Biological Process	GO:0006812	cation transport	0.524099087236745	0.808883522767214	37	1216
GO:0003713 transcription coactivator activity	2	0.524810172149788	0.111	0.032	Molecular Function	GO:0003713	transcription coactivator activity	0.524810172149788	0.891698742345689	2	63
GO:0016538 cyclin-dependent protein serine/threonine kinase regulator activity	2	0.524810172149788	0.111	0.032	Molecular Function	GO:0016538	cyclin-dependent protein serine/threonine kinase regulator activity	0.524810172149788	0.891698742345689	2	63
GO:0009555 pollen development	4	0.530091169755762	0.294	0.032	Biological Process	GO:0009555	pollen development	0.530091169755762	0.815812441000673	4	125
GO:0007389 pattern specification process	2	0.530398768964195	0.147	0.034	Biological Process	GO:0007389	pattern specification process	0.530398768964195	0.815812441000673	2	58
GO:0022412 cellular process involved in reproduction in multicellular organism	2	0.530398768964195	0.147	0.034	Biological Process	GO:0022412	cellular process involved in reproduction in multicellular organism	0.530398768964195	0.815812441000673	2	58
GO:0005381 iron ion transmembrane transporter activity	1	0.532270554889415	0.055	0.037	Molecular Function	GO:0005381	iron ion transmembrane transporter activity	0.532270554889415	0.901634061161161	1	27
GO:0022607 cellular component assembly	42	0.537527604655722	3.084	0.03	Biological Process	GO:0022607	cellular component assembly	0.537527604655722	0.8258378653347	42	1388
GO:0000245 spliceosomal complex assembly	1	0.538290209978623	0.073	0.04	Biological Process	GO:0000245	spliceosomal complex assembly	0.538290209978623	0.826070787617591	1	25
GO:0036503 ERAD pathway	2	0.5396321495253	0.147	0.034	Biological Process	GO:0036503	ERAD pathway	0.5396321495253	0.826330181905666	2	59
GO:0006323 DNA packaging	9	0.539681620283064	0.661	0.031	Biological Process	GO:0006323	DNA packaging	0.539681620283064	0.826330181905666	9	294
GO:0015276 ligand-gated ion channel activity	3	0.540583500398154	0.166	0.029	Molecular Function	GO:0015276	ligand-gated ion channel activity	0.540583500398154	0.909277649660794	3	102
GO:0022834 ligand-gated channel activity	3	0.540583500398154	0.166	0.029	Molecular Function	GO:0022834	ligand-gated channel activity	0.540583500398154	0.909277649660794	3	102
GO:0008417 fucosyltransferase activity	2	0.541662714377539	0.111	0.031	Molecular Function	GO:0008417	fucosyltransferase activity	0.541662714377539	0.909277649660794	2	65
GO:0016854 racemase and epimerase activity	3	0.547187752848333	0.166	0.029	Molecular Function	GO:0016854	racemase and epimerase activity	0.547187752848333	0.915802257012628	3	103
GO:0000209 protein polyubiquitination	3	0.548184207812079	0.22	0.032	Biological Process	GO:0000209	protein polyubiquitination	0.548184207812079	0.834527607908552	3	94
GO:0051336 regulation of hydrolase activity	7	0.548248225880755	0.514	0.031	Biological Process	GO:0051336	regulation of hydrolase activity	0.548248225880755	0.834527607908552	7	229
GO:0007186 G protein-coupled receptor signaling pathway	2	0.548738937448744	0.147	0.033	Biological Process	GO:0007186	G protein-coupled receptor signaling pathway	0.548738937448744	0.834527607908552	2	60
GO:0009914 hormone transport	2	0.548738937448744	0.147	0.033	Biological Process	GO:0009914	hormone transport	0.548738937448744	0.834527607908552	2	60
GO:0051094 positive regulation of developmental process	2	0.548738937448744	0.147	0.033	Biological Process	GO:0051094	positive regulation of developmental process	0.548738937448744	0.834527607908552	2	60
GO:0060918 auxin transport	2	0.548738937448744	0.147	0.033	Biological Process	GO:0060918	auxin transport	0.548738937448744	0.834527607908552	2	60
GO:0016128 phytosteroid metabolic process	1	0.552348664607607	0.073	0.038	Biological Process	GO:0016128	phytosteroid metabolic process	0.552348664607607	0.838131755947795	1	26
GO:2000070 regulation of response to water deprivation	1	0.552348664607607	0.073	0.038	Biological Process	GO:2000070	regulation of response to water deprivation	0.552348664607607	0.838131755947795	1	26
GO:0009064 glutamine family amino acid metabolic process	5	0.5554573007169	0.367	0.031	Biological Process	GO:0009064	glutamine family amino acid metabolic process	0.5554573007169	0.8419038907727	5	163
GO:0048232 male gamete generation	2	0.55771828178283	0.147	0.033	Biological Process	GO:0048232	male gamete generation	0.55771828178283	0.844384229530108	2	61
GO:0031369 translation initiation factor binding	1	0.557875748221874	0.055	0.034	Molecular Function	GO:0031369	translation initiation factor binding	0.557875748221874	0.930903114197097	1	29
GO:0048316 seed development	8	0.558704412380022	0.587	0.03	Biological Process	GO:0048316	seed development	0.558704412380022	0.84480489189984	8	265
GO:0048523 negative regulation of cellular process	25	0.559245841901152	1.836	0.03	Biological Process	GO:0048523	negative regulation of cellular process	0.559245841901152	0.84480489189984	25	834
GO:0015936 coenzyme A metabolic process	1	0.56597936254645	0.073	0.037	Biological Process	GO:0015936	coenzyme A metabolic process	0.56597936254645	0.849226124837441	1	27
GO:0031146 SCF-dependent proteasomal ubiquitin-dependent protein catabolic process	1	0.56597936254645	0.073	0.037	Biological Process	GO:0031146	SCF-dependent proteasomal ubiquitin-dependent protein catabolic process	0.56597936254645	0.849226124837441	1	27
GO:0031348 negative regulation of defense response	1	0.56597936254645	0.073	0.037	Biological Process	GO:0031348	negative regulation of defense response	0.56597936254645	0.849226124837441	1	27
GO:0035435 phosphate ion transmembrane transport	1	0.56597936254645	0.073	0.037	Biological Process	GO:0035435	phosphate ion transmembrane transport	0.56597936254645	0.849226124837441	1	27
GO:0043248 proteasome assembly	1	0.56597936254645	0.073	0.037	Biological Process	GO:0043248	proteasome assembly	0.56597936254645	0.849226124837441	1	27
GO:0005769 early endosome	1	0.566028058009183	0.098	0.037	Cellular Component	GO:0005769	early endosome	0.566028058009183	1	1	27
GO:0006662 glycerol ether metabolic process	2	0.566569500446281	0.147	0.032	Biological Process	GO:0006662	glycerol ether metabolic process	0.566569500446281	0.849226124837441	2	62
GO:0018904 ether metabolic process	2	0.566569500446281	0.147	0.032	Biological Process	GO:0018904	ether metabolic process	0.566569500446281	0.849226124837441	2	62
GO:0009881 photoreceptor activity	1	0.570148086084506	0.055	0.033	Molecular Function	GO:0009881	photoreceptor activity	0.570148086084506	0.942937219293606	1	30
GO:0015165 pyrimidine nucleotide-sugar transmembrane transporter activity	1	0.570148086084506	0.055	0.033	Molecular Function	GO:0015165	pyrimidine nucleotide-sugar transmembrane transporter activity	0.570148086084506	0.942937219293606	1	30
GO:0047617 acyl-CoA hydrolase activity	1	0.570148086084506	0.055	0.033	Molecular Function	GO:0047617	acyl-CoA hydrolase activity	0.570148086084506	0.942937219293606	1	30
GO:0005774 vacuolar membrane	11	0.570236825107902	1.082	0.03	Cellular Component	GO:0005774	vacuolar membrane	0.570236825107902	1	11	369
GO:0048731 system development	34	0.570580811128555	2.496	0.03	Biological Process	GO:0048731	system development	0.570580811128555	0.854164157792848	34	1139
GO:0030162 regulation of proteolysis	6	0.571127513790484	0.441	0.03	Biological Process	GO:0030162	regulation of proteolysis	0.571127513790484	0.854164157792848	6	200
GO:0007276 gamete generation	2	0.575292070752355	0.147	0.032	Biological Process	GO:0007276	gamete generation	0.575292070752355	0.857546725090611	2	63
GO:0009084 glutamine family amino acid biosynthetic process	2	0.575292070752355	0.147	0.032	Biological Process	GO:0009084	glutamine family amino acid biosynthetic process	0.575292070752355	0.857546725090611	2	63
GO:0071900 regulation of protein serine/threonine kinase activity	2	0.575292070752355	0.147	0.032	Biological Process	GO:0071900	regulation of protein serine/threonine kinase activity	0.575292070752355	0.857546725090611	2	63
GO:0006458 'de novo' protein folding	1	0.579195309878421	0.073	0.036	Biological Process	GO:0006458	'de novo' protein folding	0.579195309878421	0.860518746105083	1	28
GO:0034765 regulation of ion transmembrane transport	1	0.579195309878421	0.073	0.036	Biological Process	GO:0034765	regulation of ion transmembrane transport	0.579195309878421	0.860518746105083	1	28
GO:0051302 regulation of cell division	1	0.579195309878421	0.073	0.036	Biological Process	GO:0051302	regulation of cell division	0.579195309878421	0.860518746105083	1	28
GO:0003727 single-stranded RNA binding	1	0.582079956272677	0.055	0.032	Molecular Function	GO:0003727	single-stranded RNA binding	0.582079956272677	0.957007928107137	1	31
GO:0004834 tryptophan synthase activity	1	0.582079956272677	0.055	0.032	Molecular Function	GO:0004834	tryptophan synthase activity	0.582079956272677	0.957007928107137	1	31
GO:0019842 vitamin binding	11	0.586827371754139	0.61	0.027	Molecular Function	GO:0019842	vitamin binding	0.586827371754139	0.961983873344762	11	410
GO:0005261 cation channel activity	5	0.590276437012632	0.277	0.027	Molecular Function	GO:0005261	cation channel activity	0.590276437012632	0.964808562251642	5	186
GO:0019005 SCF ubiquitin ligase complex	1	0.592061103694206	0.098	0.034	Cellular Component	GO:0019005	SCF ubiquitin ligase complex	0.592061103694206	1	1	29
GO:0016984 ribulose-bisphosphate carboxylase activity	1	0.593680799176642	0.055	0.031	Molecular Function	GO:0016984	ribulose-bisphosphate carboxylase activity	0.593680799176642	0.967543926354935	1	32
GO:2000113 negative regulation of cellular macromolecule biosynthetic process	10	0.595163493667593	0.734	0.029	Biological Process	GO:2000113	negative regulation of cellular macromolecule biosynthetic process	0.595163493667593	0.883272276002838	10	342
GO:0010154 fruit development	8	0.596479786107826	0.587	0.029	Biological Process	GO:0010154	fruit development	0.596479786107826	0.884255121510725	8	274
GO:0000325 plant-type vacuole	2	0.600770507887221	0.197	0.03	Cellular Component	GO:0000325	plant-type vacuole	0.600770507887221	1	2	66
GO:0006743 ubiquinone metabolic process	1	0.604433013191481	0.073	0.033	Biological Process	GO:0006743	ubiquinone metabolic process	0.604433013191481	0.894084719731819	1	30
GO:0006744 ubiquinone biosynthetic process	1	0.604433013191481	0.073	0.033	Biological Process	GO:0006744	ubiquinone biosynthetic process	0.604433013191481	0.894084719731819	1	30
GO:0042995 cell projection	1	0.604486568893613	0.098	0.033	Cellular Component	GO:0042995	cell projection	0.604486568893613	1	1	30
GO:0010558 negative regulation of macromolecule biosynthetic process	10	0.606154816867827	0.734	0.029	Biological Process	GO:0010558	negative regulation of macromolecule biosynthetic process	0.606154816867827	0.894447290209644	10	345
GO:0044281 small molecule metabolic process	101	0.606602388937196	7.416	0.03	Biological Process	GO:0044281	small molecule metabolic process	0.606602388937196	0.894447290209644	101	3392
GO:0007062 sister chromatid cohesion	2	0.608890497480096	0.147	0.03	Biological Process	GO:0007062	sister chromatid cohesion	0.608890497480096	0.894447290209644	2	67
GO:0046855 inositol phosphate dephosphorylation	2	0.608890497480096	0.147	0.03	Biological Process	GO:0046855	inositol phosphate dephosphorylation	0.608890497480096	0.894447290209644	2	67
GO:0071545 inositol phosphate catabolic process	2	0.608890497480096	0.147	0.03	Biological Process	GO:0071545	inositol phosphate catabolic process	0.608890497480096	0.894447290209644	2	67
GO:0019953 sexual reproduction	6	0.609309137783345	0.441	0.029	Biological Process	GO:0019953	sexual reproduction	0.609309137783345	0.894447290209644	6	208
GO:0044703 multi-organism reproductive process	6	0.609309137783345	0.441	0.029	Biological Process	GO:0044703	multi-organism reproductive process	0.609309137783345	0.894447290209644	6	208
GO:0015020 glucuronosyltransferase activity	2	0.612248660650558	0.111	0.027	Molecular Function	GO:0015020	glucuronosyltransferase activity	0.612248660650558	0.992020293633802	2	74
GO:1901681 sulfur compound binding	2	0.612248660650558	0.111	0.027	Molecular Function	GO:1901681	sulfur compound binding	0.612248660650558	0.992020293633802	2	74
GO:0034637 cellular carbohydrate biosynthetic process	11	0.612384765435998	0.808	0.029	Biological Process	GO:0034637	cellular carbohydrate biosynthetic process	0.612384765435998	0.89798720484758	11	381
GO:0065004 protein-DNA complex assembly	10	0.613401156852313	0.734	0.029	Biological Process	GO:0065004	protein-DNA complex assembly	0.613401156852313	0.898503102994938	10	347
GO:0006470 protein dephosphorylation	7	0.61515975590432	0.514	0.029	Biological Process	GO:0006470	protein dephosphorylation	0.61515975590432	0.900103885262598	7	244
GO:0006305 DNA alkylation	2	0.616966952686051	0.147	0.029	Biological Process	GO:0006305	DNA alkylation	0.616966952686051	0.900798401761924	2	68
GO:0006306 DNA methylation	2	0.616966952686051	0.147	0.029	Biological Process	GO:0006306	DNA methylation	0.616966952686051	0.900798401761924	2	68
GO:0015926 glucosidase activity	2	0.619556599952895	0.111	0.027	Molecular Function	GO:0015926	glucosidase activity	0.619556599952895	1	2	75
GO:0016620 oxidoreductase activity, acting on the aldehyde or oxo group of donors, NAD or NADP as acceptor	4	0.62145126942874	0.222	0.026	Molecular Function	GO:0016620	oxidoreductase activity, acting on the aldehyde or oxo group of donors, NAD or NADP as acceptor	0.62145126942874	1	4	154
GO:0009112 nucleobase metabolic process	2	0.624914490867568	0.147	0.029	Biological Process	GO:0009112	nucleobase metabolic process	0.624914490867568	0.911417898223249	2	69
GO:0004564 beta-fructofuranosidase activity	1	0.626587687077078	0.055	0.029	Molecular Function	GO:0004564	beta-fructofuranosidase activity	0.626587687077078	1	1	35
GO:0004565 beta-galactosidase activity	1	0.626587687077078	0.055	0.029	Molecular Function	GO:0004565	beta-galactosidase activity	0.626587687077078	1	1	35
GO:0044085 cellular component biogenesis	62	0.62699376203862	4.552	0.029	Biological Process	GO:0044085	cellular component biogenesis	0.62699376203862	0.912600392070691	62	2107
GO:0015979 photosynthesis	21	0.627075269403603	1.542	0.029	Biological Process	GO:0015979	photosynthesis	0.627075269403603	0.912600392070691	21	727
GO:0010584 pollen exine formation	1	0.628158133197348	0.073	0.031	Biological Process	GO:0010584	pollen exine formation	0.628158133197348	0.913193329121307	1	32
GO:0035251 UDP-glucosyltransferase activity	6	0.629207573918612	0.333	0.026	Molecular Function	GO:0035251	UDP-glucosyltransferase activity	0.629207573918612	1	6	233
GO:0071824 protein-DNA complex subunit organization	10	0.631220858776163	0.734	0.028	Biological Process	GO:0071824	protein-DNA complex subunit organization	0.631220858776163	0.91666015152027	10	352
GO:0016020 membrane	549	0.631827797205276	53.982	0.03	Cellular Component	GO:0016020	membrane	0.631827797205276	1	549	18196
GO:0016651 oxidoreductase activity, acting on NAD(P)H	10	0.63687957381029	0.555	0.026	Molecular Function	GO:0016651	oxidoreductase activity, acting on NAD(P)H	0.63687957381029	1	10	388
GO:0098772 molecular function regulator	40	0.636988468311298	2.22	0.027	Molecular Function	GO:0098772	molecular function regulator	0.636988468311298	1	40	1508
GO:0004857 enzyme inhibitor activity	9	0.637116169426396	0.499	0.026	Molecular Function	GO:0004857	enzyme inhibitor activity	0.637116169426396	1	9	350
GO:0005665 RNA polymerase II, core complex	1	0.63953994641426	0.098	0.03	Cellular Component	GO:0005665	RNA polymerase II, core complex	0.63953994641426	1	1	33
GO:0005764 lysosome	1	0.63953994641426	0.098	0.03	Cellular Component	GO:0005764	lysosome	0.63953994641426	1	1	33
GO:0003747 translation release factor activity	1	0.647032104977059	0.055	0.027	Molecular Function	GO:0003747	translation release factor activity	0.647032104977059	1	1	37
GO:0008079 translation termination factor activity	1	0.647032104977059	0.055	0.027	Molecular Function	GO:0008079	translation termination factor activity	0.647032104977059	1	1	37
GO:0006631 fatty acid metabolic process	12	0.647222893655669	0.881	0.028	Biological Process	GO:0006631	fatty acid metabolic process	0.647222893655669	0.937986468569552	12	426
GO:0009743 response to carbohydrate	2	0.64798769352364	0.147	0.028	Biological Process	GO:0009743	response to carbohydrate	0.64798769352364	0.937986468569552	2	72
GO:0046916 cellular transition metal ion homeostasis	2	0.64798769352364	0.147	0.028	Biological Process	GO:0046916	cellular transition metal ion homeostasis	0.64798769352364	0.937986468569552	2	72
GO:0016567 protein ubiquitination	41	0.649206871390742	3.01	0.029	Biological Process	GO:0016567	protein ubiquitination	0.649206871390742	0.938552428789239	41	1415
GO:0006536 glutamate metabolic process	1	0.650461261668281	0.073	0.029	Biological Process	GO:0006536	glutamate metabolic process	0.650461261668281	0.938552428789239	1	34
GO:0061025 membrane fusion	1	0.650461261668281	0.073	0.029	Biological Process	GO:0061025	membrane fusion	0.650461261668281	0.938552428789239	1	34
GO:0005244 voltage-gated ion channel activity	4	0.651141012937451	0.222	0.025	Molecular Function	GO:0005244	voltage-gated ion channel activity	0.651141012937451	1	4	160
GO:0022832 voltage-gated channel activity	4	0.651141012937451	0.222	0.025	Molecular Function	GO:0022832	voltage-gated channel activity	0.651141012937451	1	4	160
GO:0006779 porphyrin-containing compound biosynthetic process	3	0.65444811982482	0.22	0.027	Biological Process	GO:0006779	porphyrin-containing compound biosynthetic process	0.65444811982482	0.943298356080124	3	110
GO:0034599 cellular response to oxidative stress	2	0.655424115974366	0.147	0.027	Biological Process	GO:0034599	cellular response to oxidative stress	0.655424115974366	0.943699046642538	2	73
GO:0140678 molecular function inhibitor activity	9	0.656843853795185	0.499	0.025	Molecular Function	GO:0140678	molecular function inhibitor activity	0.656843853795185	1	9	356
GO:0031327 negative regulation of cellular biosynthetic process	10	0.658805254088501	0.734	0.028	Biological Process	GO:0031327	negative regulation of cellular biosynthetic process	0.658805254088501	0.947558195242184	10	360
GO:0016410 N-acyltransferase activity	4	0.660684639934484	0.222	0.025	Molecular Function	GO:0016410	N-acyltransferase activity	0.660684639934484	1	4	162
GO:0010208 pollen wall assembly	1	0.661106397431615	0.073	0.029	Biological Process	GO:0010208	pollen wall assembly	0.661106397431615	0.949857438180174	1	35
GO:0009927 histidine phosphotransfer kinase activity	2	0.661174941583035	0.111	0.025	Molecular Function	GO:0009927	histidine phosphotransfer kinase activity	0.661174941583035	1	2	81
GO:0016796 exonuclease activity, active with either ribo- or deoxyribonucleic acids and producing 5'-phosphomonoesters	2	0.661174941583035	0.111	0.025	Molecular Function	GO:0016796	exonuclease activity, active with either ribo- or deoxyribonucleic acids and producing 5'-phosphomonoesters	0.661174941583035	1	2	81
GO:0016709 oxidoreductase activity, acting on paired donors, with incorporation or reduction of molecular oxygen, NAD(P)H as one donor, and incorporation of one atom of oxygen	5	0.662333961490243	0.277	0.025	Molecular Function	GO:0016709	oxidoreductase activity, acting on paired donors, with incorporation or reduction of molecular oxygen, NAD(P)H as one donor, and incorporation of one atom of oxygen	0.662333961490243	1	5	202
GO:0005506 iron ion binding	49	0.662692315425922	2.719	0.026	Molecular Function	GO:0005506	iron ion binding	0.662692315425922	1	49	1858
GO:0006563 L-serine metabolic process	2	0.662734338815079	0.147	0.027	Biological Process	GO:0006563	L-serine metabolic process	0.662734338815079	0.951185590316335	2	74
GO:0005338 nucleotide-sugar transmembrane transporter activity	1	0.666357772919571	0.055	0.026	Molecular Function	GO:0005338	nucleotide-sugar transmembrane transporter activity	0.666357772919571	1	1	39
GO:0000097 sulfur amino acid biosynthetic process	3	0.666387107048044	0.22	0.027	Biological Process	GO:0000097	sulfur amino acid biosynthetic process	0.666387107048044	0.952539425468403	3	112
GO:0055076 transition metal ion homeostasis	3	0.666387107048044	0.22	0.027	Biological Process	GO:0055076	transition metal ion homeostasis	0.666387107048044	0.952539425468403	3	112
GO:0009890 negative regulation of biosynthetic process	10	0.668841247823158	0.734	0.028	Biological Process	GO:0009890	negative regulation of biosynthetic process	0.668841247823158	0.952539425468403	10	363
GO:0051172 negative regulation of nitrogen compound metabolic process	16	0.66904404375361	1.175	0.028	Biological Process	GO:0051172	negative regulation of nitrogen compound metabolic process	0.66904404375361	0.952539425468403	16	572
GO:0006534 cysteine metabolic process	2	0.669919150163524	0.147	0.027	Biological Process	GO:0006534	cysteine metabolic process	0.669919150163524	0.952539425468403	2	75
GO:0010016 shoot system morphogenesis	2	0.669919150163524	0.147	0.027	Biological Process	GO:0010016	shoot system morphogenesis	0.669919150163524	0.952539425468403	2	75
GO:0009853 photorespiration	1	0.671427568395997	0.073	0.028	Biological Process	GO:0009853	photorespiration	0.671427568395997	0.952539425468403	1	36
GO:0010927 cellular component assembly involved in morphogenesis	1	0.671427568395997	0.073	0.028	Biological Process	GO:0010927	cellular component assembly involved in morphogenesis	0.671427568395997	0.952539425468403	1	36
GO:0015718 monocarboxylic acid transport	1	0.671427568395997	0.073	0.028	Biological Process	GO:0015718	monocarboxylic acid transport	0.671427568395997	0.952539425468403	1	36
GO:0032989 cellular component morphogenesis	1	0.671427568395997	0.073	0.028	Biological Process	GO:0032989	cellular component morphogenesis	0.671427568395997	0.952539425468403	1	36
GO:0070988 demethylation	1	0.671427568395997	0.073	0.028	Biological Process	GO:0070988	demethylation	0.671427568395997	0.952539425468403	1	36
GO:0046838 phosphorylated carbohydrate dephosphorylation	2	0.676979407027028	0.147	0.026	Biological Process	GO:0046838	phosphorylated carbohydrate dephosphorylation	0.676979407027028	0.959408970964929	2	76
GO:0008356 asymmetric cell division	1	0.681434626800395	0.073	0.027	Biological Process	GO:0008356	asymmetric cell division	0.681434626800395	0.962420369892942	1	37
GO:0009813 flavonoid biosynthetic process	1	0.681434626800395	0.073	0.027	Biological Process	GO:0009813	flavonoid biosynthetic process	0.681434626800395	0.962420369892942	1	37
GO:0043269 regulation of ion transport	1	0.681434626800395	0.073	0.027	Biological Process	GO:0043269	regulation of ion transport	0.681434626800395	0.962420369892942	1	37
GO:0000323 lytic vacuole	1	0.681497658239279	0.098	0.027	Cellular Component	GO:0000323	lytic vacuole	0.681497658239279	1	1	37
GO:0008652 cellular amino acid biosynthetic process	10	0.681951711802839	0.734	0.027	Biological Process	GO:0008652	cellular amino acid biosynthetic process	0.681951711802839	0.962420369892942	10	367
GO:0046906 tetrapyrrole binding	68	0.684125378954665	3.774	0.026	Molecular Function	GO:0046906	tetrapyrrole binding	0.684125378954665	1	68	2578
GO:0043424 protein histidine kinase binding	2	0.686833160891255	0.111	0.024	Molecular Function	GO:0043424	protein histidine kinase binding	0.686833160891255	1	2	85
GO:0009070 serine family amino acid biosynthetic process	2	0.690730000514143	0.147	0.026	Biological Process	GO:0009070	serine family amino acid biosynthetic process	0.690730000514143	0.972338599005475	2	78
GO:0006623 protein targeting to vacuole	1	0.691137125476525	0.073	0.026	Biological Process	GO:0006623	protein targeting to vacuole	0.691137125476525	0.972338599005475	1	38
GO:0048582 positive regulation of post-embryonic development	1	0.691137125476525	0.073	0.026	Biological Process	GO:0048582	positive regulation of post-embryonic development	0.691137125476525	0.972338599005475	1	38
GO:0042802 identical protein binding	3	0.692775188048858	0.166	0.023	Molecular Function	GO:0042802	identical protein binding	0.692775188048858	1	3	128
GO:0009521 photosystem	12	0.693177639974533	1.18	0.027	Cellular Component	GO:0009521	photosystem	0.693177639974533	1	12	441
GO:0006338 chromatin remodeling	9	0.693224581390935	0.661	0.027	Biological Process	GO:0006338	chromatin remodeling	0.693224581390935	0.974261573846719	9	335
GO:0008083 growth factor activity	1	0.693381546865449	0.055	0.024	Molecular Function	GO:0008083	growth factor activity	0.693381546865449	1	1	42
GO:0004175 endopeptidase activity	33	0.695981027310925	1.831	0.026	Molecular Function	GO:0004175	endopeptidase activity	0.695981027310925	1	33	1283
GO:0140359 ABC-type transporter activity	10	0.697271794880915	0.555	0.025	Molecular Function	GO:0140359	ABC-type transporter activity	0.697271794880915	1	10	408
GO:0043666 regulation of phosphoprotein phosphatase activity	1	0.700544326941281	0.073	0.026	Biological Process	GO:0043666	regulation of phosphoprotein phosphatase activity	0.700544326941281	0.979458045527003	1	39
GO:0048469 cell maturation	1	0.700544326941281	0.073	0.026	Biological Process	GO:0048469	cell maturation	0.700544326941281	0.979458045527003	1	39
GO:0048764 trichoblast maturation	1	0.700544326941281	0.073	0.026	Biological Process	GO:0048764	trichoblast maturation	0.700544326941281	0.979458045527003	1	39
GO:0048765 root hair cell differentiation	1	0.700544326941281	0.073	0.026	Biological Process	GO:0048765	root hair cell differentiation	0.700544326941281	0.979458045527003	1	39
GO:0080147 root hair cell development	1	0.700544326941281	0.073	0.026	Biological Process	GO:0080147	root hair cell development	0.700544326941281	0.979458045527003	1	39
GO:0016859 cis-trans isomerase activity	4	0.701408763425631	0.222	0.023	Molecular Function	GO:0016859	cis-trans isomerase activity	0.701408763425631	1	4	171
GO:0019900 kinase binding	4	0.701408763425631	0.222	0.023	Molecular Function	GO:0019900	kinase binding	0.701408763425631	1	4	171
GO:0016289 CoA hydrolase activity	1	0.701894264527121	0.055	0.023	Molecular Function	GO:0016289	CoA hydrolase activity	0.701894264527121	1	1	43
GO:0051338 regulation of transferase activity	3	0.705784601787819	0.22	0.025	Biological Process	GO:0051338	regulation of transferase activity	0.705784601787819	0.985765270265632	3	119
GO:0003779 actin binding	6	0.705891379661703	0.333	0.024	Molecular Function	GO:0003779	actin binding	0.705891379661703	1	6	253
GO:0035304 regulation of protein dephosphorylation	1	0.709665212213235	0.073	0.025	Biological Process	GO:0035304	regulation of protein dephosphorylation	0.709665212213235	0.988193201414981	1	40
GO:0046854 phosphatidylinositol phosphate biosynthetic process	1	0.709665212213235	0.073	0.025	Biological Process	GO:0046854	phosphatidylinositol phosphate biosynthetic process	0.709665212213235	0.988193201414981	1	40
GO:0004445 inositol-polyphosphate 5-phosphatase activity	1	0.710170769192742	0.055	0.023	Molecular Function	GO:0004445	inositol-polyphosphate 5-phosphatase activity	0.710170769192742	1	1	44
GO:0046030 inositol trisphosphate phosphatase activity	1	0.710170769192742	0.055	0.023	Molecular Function	GO:0046030	inositol trisphosphate phosphatase activity	0.710170769192742	1	1	44
GO:0006304 DNA modification	2	0.710446591549824	0.147	0.025	Biological Process	GO:0006304	DNA modification	0.710446591549824	0.988193201414981	2	81
GO:0044728 DNA methylation or demethylation	2	0.710446591549824	0.147	0.025	Biological Process	GO:0044728	DNA methylation or demethylation	0.710446591549824	0.988193201414981	2	81
GO:0009987 cellular process	1053	0.713498543144152	77.313	0.03	Biological Process	GO:0009987	cellular process	0.713498543144152	0.991418325108832	1053	34863
GO:0048229 gametophyte development	4	0.716319951947235	0.294	0.025	Biological Process	GO:0048229	gametophyte development	0.716319951947235	0.993275539485544	4	159
GO:0051239 regulation of multicellular organismal process	7	0.717082093610863	0.514	0.026	Biological Process	GO:0051239	regulation of multicellular organismal process	0.717082093610863	0.993275539485544	7	270
GO:0008970 phospholipase A1 activity	1	0.718217611820541	0.055	0.022	Molecular Function	GO:0008970	phospholipase A1 activity	0.718217611820541	1	1	45
GO:0006378 mRNA polyadenylation	1	0.718508489361585	0.073	0.024	Biological Process	GO:0006378	mRNA polyadenylation	0.718508489361585	0.993275539485544	1	41
GO:0010053 root epidermal cell differentiation	1	0.718508489361585	0.073	0.024	Biological Process	GO:0010053	root epidermal cell differentiation	0.718508489361585	0.993275539485544	1	41
GO:0010054 trichoblast differentiation	1	0.718508489361585	0.073	0.024	Biological Process	GO:0010054	trichoblast differentiation	0.718508489361585	0.993275539485544	1	41
GO:0031324 negative regulation of cellular metabolic process	16	0.722208424033578	1.175	0.027	Biological Process	GO:0031324	negative regulation of cellular metabolic process	0.722208424033578	0.997370571290498	16	593
GO:0062197 cellular response to chemical stress	2	0.722997969062666	0.147	0.024	Biological Process	GO:0062197	cellular response to chemical stress	0.722997969062666	0.997442096094616	2	83
GO:0030545 signaling receptor regulator activity	1	0.726041161787405	0.055	0.022	Molecular Function	GO:0030545	signaling receptor regulator activity	0.726041161787405	1	1	46
GO:0030546 signaling receptor activator activity	1	0.726041161787405	0.055	0.022	Molecular Function	GO:0030546	signaling receptor activator activity	0.726041161787405	1	1	46
GO:0048018 receptor ligand activity	1	0.726041161787405	0.055	0.022	Molecular Function	GO:0048018	receptor ligand activity	0.726041161787405	1	1	46
GO:0016413 O-acetyltransferase activity	4	0.726528556796952	0.222	0.023	Molecular Function	GO:0016413	O-acetyltransferase activity	0.726528556796952	1	4	177
GO:0008483 transaminase activity	3	0.726568266243171	0.166	0.022	Molecular Function	GO:0008483	transaminase activity	0.726568266243171	1	3	135
GO:0016769 transferase activity, transferring nitrogenous groups	3	0.726568266243171	0.166	0.022	Molecular Function	GO:0016769	transferase activity, transferring nitrogenous groups	0.726568266243171	1	3	135
GO:0046434 organophosphate catabolic process	3	0.726645091270703	0.22	0.024	Biological Process	GO:0046434	organophosphate catabolic process	0.726645091270703	0.999247269648444	3	123
GO:0004497 monooxygenase activity	47	0.72696472096762	2.608	0.026	Molecular Function	GO:0004497	monooxygenase activity	0.72696472096762	1	47	1830
GO:0009850 auxin metabolic process	1	0.727082601795656	0.073	0.024	Biological Process	GO:0009850	auxin metabolic process	0.727082601795656	0.999247269648444	1	42
GO:0045859 regulation of protein kinase activity	2	0.729099390918471	0.147	0.024	Biological Process	GO:0045859	regulation of protein kinase activity	0.729099390918471	0.999247269648444	2	84
GO:0005996 monosaccharide metabolic process	8	0.729273933292977	0.587	0.026	Biological Process	GO:0005996	monosaccharide metabolic process	0.729273933292977	0.999247269648444	8	310
GO:0022836 gated channel activity	7	0.731916433724034	0.388	0.023	Molecular Function	GO:0022836	gated channel activity	0.731916433724034	1	7	301
GO:0002161 aminoacyl-tRNA editing activity	1	0.733647611919283	0.055	0.021	Molecular Function	GO:0002161	aminoacyl-tRNA editing activity	0.733647611919283	1	1	47
GO:0010921 regulation of phosphatase activity	1	0.735395736302842	0.073	0.023	Biological Process	GO:0010921	regulation of phosphatase activity	0.735395736302842	0.999247269648444	1	43
GO:0016126 sterol biosynthetic process	1	0.735395736302842	0.073	0.023	Biological Process	GO:0016126	sterol biosynthetic process	0.735395736302842	0.999247269648444	1	43
GO:0045862 positive regulation of proteolysis	1	0.735395736302842	0.073	0.023	Biological Process	GO:0045862	positive regulation of proteolysis	0.735395736302842	0.999247269648444	1	43
GO:0071897 DNA biosynthetic process	1	0.735395736302842	0.073	0.023	Biological Process	GO:0071897	DNA biosynthetic process	0.735395736302842	0.999247269648444	1	43
GO:1901800 positive regulation of proteasomal protein catabolic process	1	0.735395736302842	0.073	0.023	Biological Process	GO:1901800	positive regulation of proteasomal protein catabolic process	0.735395736302842	0.999247269648444	1	43
GO:1903052 positive regulation of proteolysis involved in cellular protein catabolic process	1	0.735395736302842	0.073	0.023	Biological Process	GO:1903052	positive regulation of proteolysis involved in cellular protein catabolic process	0.735395736302842	0.999247269648444	1	43
GO:1903364 positive regulation of cellular protein catabolic process	1	0.735395736302842	0.073	0.023	Biological Process	GO:1903364	positive regulation of cellular protein catabolic process	0.735395736302842	0.999247269648444	1	43
GO:0032446 protein modification by small protein conjugation	41	0.737666195107689	3.01	0.028	Biological Process	GO:0032446	protein modification by small protein conjugation	0.737666195107689	0.999247269648444	41	1469
GO:0000724 double-strand break repair via homologous recombination	2	0.74096010788372	0.147	0.023	Biological Process	GO:0000724	double-strand break repair via homologous recombination	0.74096010788372	0.999247269648444	2	86
GO:0001932 regulation of protein phosphorylation	2	0.74096010788372	0.147	0.023	Biological Process	GO:0001932	regulation of protein phosphorylation	0.74096010788372	0.999247269648444	2	86
GO:0008422 beta-glucosidase activity	1	0.741042983382302	0.055	0.021	Molecular Function	GO:0008422	beta-glucosidase activity	0.741042983382302	1	1	48
GO:0009791 post-embryonic development	22	0.742296969449855	1.615	0.027	Biological Process	GO:0009791	post-embryonic development	0.742296969449855	0.999247269648444	22	813
GO:0016051 carbohydrate biosynthetic process	13	0.742900752788048	0.954	0.026	Biological Process	GO:0016051	carbohydrate biosynthetic process	0.742900752788048	0.999247269648444	13	495
GO:0006475 internal protein amino acid acetylation	1	0.743455830842585	0.073	0.023	Biological Process	GO:0006475	internal protein amino acid acetylation	0.743455830842585	0.999247269648444	1	44
GO:0009640 photomorphogenesis	1	0.743455830842585	0.073	0.023	Biological Process	GO:0009640	photomorphogenesis	0.743455830842585	0.999247269648444	1	44
GO:0009812 flavonoid metabolic process	1	0.743455830842585	0.073	0.023	Biological Process	GO:0009812	flavonoid metabolic process	0.743455830842585	0.999247269648444	1	44
GO:0010374 stomatal complex development	1	0.743455830842585	0.073	0.023	Biological Process	GO:0010374	stomatal complex development	0.743455830842585	0.999247269648444	1	44
GO:0016573 histone acetylation	1	0.743455830842585	0.073	0.023	Biological Process	GO:0016573	histone acetylation	0.743455830842585	0.999247269648444	1	44
GO:0018393 internal peptidyl-lysine acetylation	1	0.743455830842585	0.073	0.023	Biological Process	GO:0018393	internal peptidyl-lysine acetylation	0.743455830842585	0.999247269648444	1	44
GO:0018394 peptidyl-lysine acetylation	1	0.743455830842585	0.073	0.023	Biological Process	GO:0018394	peptidyl-lysine acetylation	0.743455830842585	0.999247269648444	1	44
GO:0045732 positive regulation of protein catabolic process	1	0.743455830842585	0.073	0.023	Biological Process	GO:0045732	positive regulation of protein catabolic process	0.743455830842585	0.999247269648444	1	44
GO:0098661 inorganic anion transmembrane transport	1	0.743455830842585	0.073	0.023	Biological Process	GO:0098661	inorganic anion transmembrane transport	0.743455830842585	0.999247269648444	1	44
GO:0016311 dephosphorylation	9	0.743522746498768	0.661	0.026	Biological Process	GO:0016311	dephosphorylation	0.743522746498768	0.999247269648444	9	351
GO:0019887 protein kinase regulator activity	2	0.744012327095833	0.111	0.021	Molecular Function	GO:0019887	protein kinase regulator activity	0.744012327095833	1	2	95
GO:0030154 cell differentiation	6	0.744793957083884	0.441	0.025	Biological Process	GO:0030154	cell differentiation	0.744793957083884	0.999961698090776	6	241
GO:0043549 regulation of kinase activity	2	0.746722051735238	0.147	0.023	Biological Process	GO:0043549	regulation of kinase activity	0.746722051735238	1	2	87
GO:0046686 response to cadmium ion	2	0.746722051735238	0.147	0.023	Biological Process	GO:0046686	response to cadmium ion	0.746722051735238	1	2	87
GO:0050790 regulation of catalytic activity	13	0.74789156788208	0.954	0.026	Biological Process	GO:0050790	regulation of catalytic activity	0.74789156788208	1	13	497
GO:0003002 regionalization	1	0.751270582103822	0.073	0.022	Biological Process	GO:0003002	regionalization	0.751270582103822	1	1	45
GO:0030433 ubiquitin-dependent ERAD pathway	1	0.751270582103822	0.073	0.022	Biological Process	GO:0030433	ubiquitin-dependent ERAD pathway	0.751270582103822	1	1	45
GO:0051128 regulation of cellular component organization	6	0.75178821083626	0.441	0.025	Biological Process	GO:0051128	regulation of cellular component organization	0.75178821083626	1	6	243
GO:0052745 inositol phosphate phosphatase activity	1	0.755223745069662	0.055	0.02	Molecular Function	GO:0052745	inositol phosphate phosphatase activity	0.755223745069662	1	1	50
GO:0006857 oligopeptide transport	3	0.755736861564434	0.22	0.023	Biological Process	GO:0006857	oligopeptide transport	0.755736861564434	1	3	129
GO:0015833 peptide transport	3	0.755736861564434	0.22	0.023	Biological Process	GO:0015833	peptide transport	0.755736861564434	1	3	129
GO:0042325 regulation of phosphorylation	2	0.757915912194639	0.147	0.022	Biological Process	GO:0042325	regulation of phosphorylation	0.757915912194639	1	2	89
GO:0009744 response to sucrose	1	0.758847452833051	0.073	0.022	Biological Process	GO:0009744	response to sucrose	0.758847452833051	1	1	46
GO:0033014 tetrapyrrole biosynthetic process	3	0.760334547742658	0.22	0.023	Biological Process	GO:0033014	tetrapyrrole biosynthetic process	0.760334547742658	1	3	130
GO:0042651 thylakoid membrane	14	0.760773048262322	1.377	0.026	Cellular Component	GO:0042651	thylakoid membrane	0.760773048262322	1	14	538
GO:0035303 regulation of dephosphorylation	1	0.766193678939993	0.073	0.021	Biological Process	GO:0035303	regulation of dephosphorylation	0.766193678939993	1	1	47
GO:0003006 developmental process involved in reproduction	18	0.766856243122736	1.322	0.026	Biological Process	GO:0003006	developmental process involved in reproduction	0.766856243122736	1	18	684
GO:0016759 cellulose synthase activity	2	0.769089412757063	0.111	0.02	Molecular Function	GO:0016759	cellulose synthase activity	0.769089412757063	1	2	100
GO:0016760 cellulose synthase (UDP-forming) activity	2	0.769089412757063	0.111	0.02	Molecular Function	GO:0016760	cellulose synthase (UDP-forming) activity	0.769089412757063	1	2	100
GO:0016903 oxidoreductase activity, acting on the aldehyde or oxo group of donors	4	0.771961912755442	0.222	0.021	Molecular Function	GO:0016903	oxidoreductase activity, acting on the aldehyde or oxo group of donors	0.771961912755442	1	4	189
GO:0008236 serine-type peptidase activity	18	0.772944859239885	0.999	0.024	Molecular Function	GO:0008236	serine-type peptidase activity	0.772944859239885	1	18	754
GO:0017171 serine hydrolase activity	18	0.772944859239885	0.999	0.024	Molecular Function	GO:0017171	serine hydrolase activity	0.772944859239885	1	18	754
GO:0045492 xylan biosynthetic process	1	0.773316276387571	0.073	0.021	Biological Process	GO:0045492	xylan biosynthetic process	0.773316276387571	1	1	48
GO:0000725 recombinational repair	2	0.773902620125736	0.147	0.022	Biological Process	GO:0000725	recombinational repair	0.773902620125736	1	2	92
GO:0065009 regulation of molecular function	13	0.774183607778584	0.954	0.026	Biological Process	GO:0065009	regulation of molecular function	0.774183607778584	1	13	508
GO:0048869 cellular developmental process	7	0.778956968506932	0.514	0.024	Biological Process	GO:0048869	cellular developmental process	0.778956968506932	1	7	289
GO:0006665 sphingolipid metabolic process	2	0.779022801833466	0.147	0.022	Biological Process	GO:0006665	sphingolipid metabolic process	0.779022801833466	1	2	93
GO:0016787 hydrolase activity	245	0.779712085366818	13.596	0.027	Molecular Function	GO:0016787	hydrolase activity	0.779712085366818	1	245	9220
GO:0006270 DNA replication initiation	1	0.780222047872766	0.073	0.02	Biological Process	GO:0006270	DNA replication initiation	0.780222047872766	1	1	49
GO:0006415 translational termination	1	0.780222047872766	0.073	0.02	Biological Process	GO:0006415	translational termination	0.780222047872766	1	1	49
GO:0033108 mitochondrial respiratory chain complex assembly	1	0.780222047872766	0.073	0.02	Biological Process	GO:0033108	mitochondrial respiratory chain complex assembly	0.780222047872766	1	1	49
GO:0061136 regulation of proteasomal protein catabolic process	1	0.780222047872766	0.073	0.02	Biological Process	GO:0061136	regulation of proteasomal protein catabolic process	0.780222047872766	1	1	49
GO:1903050 regulation of proteolysis involved in cellular protein catabolic process	1	0.780222047872766	0.073	0.02	Biological Process	GO:1903050	regulation of proteolysis involved in cellular protein catabolic process	0.780222047872766	1	1	49
GO:1903362 regulation of cellular protein catabolic process	1	0.780222047872766	0.073	0.02	Biological Process	GO:1903362	regulation of cellular protein catabolic process	0.780222047872766	1	1	49
GO:0005681 spliceosomal complex	4	0.782891459708313	0.393	0.023	Cellular Component	GO:0005681	spliceosomal complex	0.782891459708313	1	4	175
GO:0043647 inositol phosphate metabolic process	2	0.784041032138279	0.147	0.021	Biological Process	GO:0043647	inositol phosphate metabolic process	0.784041032138279	1	2	94
GO:0042181 ketone biosynthetic process	1	0.786917589304696	0.073	0.02	Biological Process	GO:0042181	ketone biosynthetic process	0.786917589304696	1	1	50
GO:1901661 quinone metabolic process	1	0.786917589304696	0.073	0.02	Biological Process	GO:1901661	quinone metabolic process	0.786917589304696	1	1	50
GO:1901663 quinone biosynthetic process	1	0.786917589304696	0.073	0.02	Biological Process	GO:1901663	quinone biosynthetic process	0.786917589304696	1	1	50
GO:0009570 chloroplast stroma	12	0.787061444100851	1.18	0.025	Cellular Component	GO:0009570	chloroplast stroma	0.787061444100851	1	12	477
GO:0003714 transcription corepressor activity	1	0.787372247767125	0.055	0.018	Molecular Function	GO:0003714	transcription corepressor activity	0.787372247767125	1	1	55
GO:0015925 galactosidase activity	1	0.787372247767125	0.055	0.018	Molecular Function	GO:0015925	galactosidase activity	0.787372247767125	1	1	55
GO:0005253 anion channel activity	2	0.787582969103102	0.111	0.019	Molecular Function	GO:0005253	anion channel activity	0.787582969103102	1	2	104
GO:0008308 voltage-gated anion channel activity	2	0.787582969103102	0.111	0.019	Molecular Function	GO:0008308	voltage-gated anion channel activity	0.787582969103102	1	2	104
GO:0042886 amide transport	3	0.79057963203813	0.22	0.022	Biological Process	GO:0042886	amide transport	0.79057963203813	1	3	137
GO:0008107 galactoside 2-alpha-L-fucosyltransferase activity	1	0.793276662873895	0.055	0.018	Molecular Function	GO:0008107	galactoside 2-alpha-L-fucosyltransferase activity	0.793276662873895	1	1	56
GO:0031127 alpha-(1,2)-fucosyltransferase activity	1	0.793276662873895	0.055	0.018	Molecular Function	GO:0031127	alpha-(1,2)-fucosyltransferase activity	0.793276662873895	1	1	56
GO:0006096 glycolytic process	4	0.793640190410327	0.294	0.022	Biological Process	GO:0006096	glycolytic process	0.793640190410327	1	4	178
GO:0006757 ATP generation from ADP	4	0.793640190410327	0.294	0.022	Biological Process	GO:0006757	ATP generation from ADP	0.793640190410327	1	4	178
GO:0009135 purine nucleoside diphosphate metabolic process	4	0.793640190410327	0.294	0.022	Biological Process	GO:0009135	purine nucleoside diphosphate metabolic process	0.793640190410327	1	4	178
GO:0009179 purine ribonucleoside diphosphate metabolic process	4	0.793640190410327	0.294	0.022	Biological Process	GO:0009179	purine ribonucleoside diphosphate metabolic process	0.793640190410327	1	4	178
GO:0015698 inorganic anion transport	4	0.793640190410327	0.294	0.022	Biological Process	GO:0015698	inorganic anion transport	0.793640190410327	1	4	178
GO:0046031 ADP metabolic process	4	0.793640190410327	0.294	0.022	Biological Process	GO:0046031	ADP metabolic process	0.793640190410327	1	4	178
GO:0016616 oxidoreductase activity, acting on the CH-OH group of donors, NAD or NADP as acceptor	8	0.795571094958968	0.444	0.022	Molecular Function	GO:0016616	oxidoreductase activity, acting on the CH-OH group of donors, NAD or NADP as acceptor	0.795571094958968	1	8	365
GO:0009056 catabolic process	91	0.797884614521782	6.681	0.028	Biological Process	GO:0009056	catabolic process	0.797884614521782	1	91	3233
GO:0005783 endoplasmic reticulum	23	0.798936088738106	2.262	0.026	Cellular Component	GO:0005783	endoplasmic reticulum	0.798936088738106	1	23	879
GO:0003885 D-arabinono-1,4-lactone oxidase activity	1	0.799017207987334	0.055	0.018	Molecular Function	GO:0003885	D-arabinono-1,4-lactone oxidase activity	0.799017207987334	1	1	57
GO:0015977 carbon fixation	1	0.799703369203836	0.073	0.019	Biological Process	GO:0015977	carbon fixation	0.799703369203836	1	1	52
GO:0009185 ribonucleoside diphosphate metabolic process	4	0.800696448294649	0.294	0.022	Biological Process	GO:0009185	ribonucleoside diphosphate metabolic process	0.800696448294649	1	4	180
GO:0048580 regulation of post-embryonic development	5	0.802303371084774	0.367	0.023	Biological Process	GO:0048580	regulation of post-embryonic development	0.802303371084774	1	5	220
GO:2000026 regulation of multicellular organismal development	5	0.802303371084774	0.367	0.023	Biological Process	GO:2000026	regulation of multicellular organismal development	0.802303371084774	1	5	220
GO:0030234 enzyme regulator activity	35	0.804539101534584	1.942	0.024	Molecular Function	GO:0030234	enzyme regulator activity	0.804539101534584	1	35	1435
GO:0016780 phosphotransferase activity, for other substituted phosphate groups	1	0.804598428668273	0.055	0.017	Molecular Function	GO:0016780	phosphotransferase activity, for other substituted phosphate groups	0.804598428668273	1	1	58
GO:0071103 DNA conformation change	9	0.805410922788376	0.661	0.024	Biological Process	GO:0071103	DNA conformation change	0.805410922788376	1	9	374
GO:0006383 transcription by RNA polymerase III	1	0.805805821135305	0.073	0.019	Biological Process	GO:0006383	transcription by RNA polymerase III	0.805805821135305	1	1	53
GO:0044248 cellular catabolic process	73	0.80627681013862	5.36	0.028	Biological Process	GO:0044248	cellular catabolic process	0.80627681013862	1	73	2626
GO:0004601 peroxidase activity	18	0.808909939148115	0.999	0.023	Molecular Function	GO:0004601	peroxidase activity	0.808909939148115	1	18	775
GO:0010073 meristem maintenance	3	0.810183894752656	0.22	0.021	Biological Process	GO:0010073	meristem maintenance	0.810183894752656	1	3	142
GO:0009055 electron transfer activity	22	0.811997825134169	1.221	0.024	Molecular Function	GO:0009055	electron transfer activity	0.811997825134169	1	22	935
GO:0016684 oxidoreductase activity, acting on peroxide as acceptor	18	0.812111350248027	0.999	0.023	Molecular Function	GO:0016684	oxidoreductase activity, acting on peroxide as acceptor	0.812111350248027	1	18	777
GO:0040029 regulation of gene expression, epigenetic	3	0.813913114257912	0.22	0.021	Biological Process	GO:0040029	regulation of gene expression, epigenetic	0.813913114257912	1	3	143
GO:2000241 regulation of reproductive process	5	0.814585209432235	0.367	0.022	Biological Process	GO:2000241	regulation of reproductive process	0.814585209432235	1	5	224
GO:0000793 condensed chromosome	2	0.816563629351247	0.197	0.02	Cellular Component	GO:0000793	condensed chromosome	0.816563629351247	1	2	101
GO:0090627 plant epidermal cell differentiation	1	0.817459002985083	0.073	0.018	Biological Process	GO:0090627	plant epidermal cell differentiation	0.817459002985083	1	1	55
GO:0009908 flower development	7	0.81770767495776	0.514	0.023	Biological Process	GO:0009908	flower development	0.81770767495776	1	7	303
GO:0016407 acetyltransferase activity	8	0.81859647130123	0.444	0.021	Molecular Function	GO:0016407	acetyltransferase activity	0.81859647130123	1	8	375
GO:0031969 chloroplast membrane	2	0.820819259964839	0.197	0.02	Cellular Component	GO:0031969	chloroplast membrane	0.820819259964839	1	2	102
GO:0006357 regulation of transcription by RNA polymerase II	15	0.821631838571483	1.101	0.025	Biological Process	GO:0006357	regulation of transcription by RNA polymerase II	0.821631838571483	1	15	604
GO:0050661 NADP binding	6	0.822341969883205	0.333	0.021	Molecular Function	GO:0050661	NADP binding	0.822341969883205	1	6	292
GO:0030135 coated vesicle	4	0.824081519635658	0.393	0.021	Cellular Component	GO:0030135	coated vesicle	0.824081519635658	1	4	187
GO:0019220 regulation of phosphate metabolic process	3	0.824729628613158	0.22	0.021	Biological Process	GO:0019220	regulation of phosphate metabolic process	0.824729628613158	1	3	146
GO:0051174 regulation of phosphorus metabolic process	3	0.824729628613158	0.22	0.021	Biological Process	GO:0051174	regulation of phosphorus metabolic process	0.824729628613158	1	3	146
GO:0044242 cellular lipid catabolic process	2	0.824859000809345	0.147	0.019	Biological Process	GO:0044242	cellular lipid catabolic process	0.824859000809345	1	2	103
GO:0048856 anatomical structure development	52	0.825132670012646	3.818	0.027	Biological Process	GO:0048856	anatomical structure development	0.825132670012646	1	52	1919
GO:0006869 lipid transport	7	0.825282935844831	0.514	0.023	Biological Process	GO:0006869	lipid transport	0.825282935844831	1	7	306
GO:0090567 reproductive shoot system development	7	0.825282935844831	0.514	0.023	Biological Process	GO:0090567	reproductive shoot system development	0.825282935844831	1	7	306
GO:0017018 myosin phosphatase activity	1	0.825416640224852	0.055	0.016	Molecular Function	GO:0017018	myosin phosphatase activity	0.825416640224852	1	1	62
GO:0009532 plastid stroma	12	0.825512304502802	1.18	0.024	Cellular Component	GO:0009532	plastid stroma	0.825512304502802	1	12	495
GO:0033043 regulation of organelle organization	4	0.826985501176498	0.294	0.021	Biological Process	GO:0033043	regulation of organelle organization	0.826985501176498	1	4	188
GO:0051347 positive regulation of transferase activity	1	0.828413384564513	0.073	0.018	Biological Process	GO:0051347	positive regulation of transferase activity	0.828413384564513	1	1	57
GO:0072329 monocarboxylic acid catabolic process	1	0.828413384564513	0.073	0.018	Biological Process	GO:0072329	monocarboxylic acid catabolic process	0.828413384564513	1	1	57
GO:0046540 U4/U6 x U5 tri-snRNP complex	1	0.828489024988526	0.098	0.018	Cellular Component	GO:0046540	U4/U6 x U5 tri-snRNP complex	0.828489024988526	1	1	57
GO:0031328 positive regulation of cellular biosynthetic process	11	0.829670093850493	0.808	0.024	Biological Process	GO:0031328	positive regulation of cellular biosynthetic process	0.829670093850493	1	11	460
GO:0004364 glutathione transferase activity	5	0.830626207326823	0.277	0.02	Molecular Function	GO:0004364	glutathione transferase activity	0.830626207326823	1	5	252
GO:0019207 kinase regulator activity	2	0.831856979515502	0.111	0.017	Molecular Function	GO:0019207	kinase regulator activity	0.831856979515502	1	2	115
GO:0048519 negative regulation of biological process	33	0.831923725570277	2.423	0.026	Biological Process	GO:0048519	negative regulation of biological process	0.831923725570277	1	33	1258
GO:1902495 transmembrane transporter complex	2	0.833059172725512	0.197	0.019	Cellular Component	GO:1902495	transmembrane transporter complex	0.833059172725512	1	2	105
GO:0009793 embryo development ending in seed dormancy	4	0.833089438178591	0.294	0.021	Biological Process	GO:0009793	embryo development ending in seed dormancy	0.833089438178591	1	4	190
GO:0031124 mRNA 3'-end processing	1	0.833641711153992	0.073	0.017	Biological Process	GO:0031124	mRNA 3'-end processing	0.833641711153992	1	1	58
GO:0070897 transcription preinitiation complex assembly	1	0.833641711153992	0.073	0.017	Biological Process	GO:0070897	transcription preinitiation complex assembly	0.833641711153992	1	1	58
GO:0009308 amine metabolic process	6	0.835332466314552	0.441	0.022	Biological Process	GO:0009308	amine metabolic process	0.835332466314552	1	6	271
GO:0003755 peptidyl-prolyl cis-trans isomerase activity	3	0.836245708011893	0.166	0.018	Molecular Function	GO:0003755	peptidyl-prolyl cis-trans isomerase activity	0.836245708011893	1	3	164
GO:0016705 oxidoreductase activity, acting on paired donors, with incorporation or reduction of molecular oxygen	46	0.837047543221699	2.553	0.024	Molecular Function	GO:0016705	oxidoreductase activity, acting on paired donors, with incorporation or reduction of molecular oxygen	0.837047543221699	1	46	1889
GO:0009891 positive regulation of biosynthetic process	11	0.837582885371911	0.808	0.024	Biological Process	GO:0009891	positive regulation of biosynthetic process	0.837582885371911	1	11	464
GO:0005576 extracellular region	54	0.838645557780529	5.31	0.027	Cellular Component	GO:0005576	extracellular region	0.838645557780529	1	54	2000
GO:0051241 negative regulation of multicellular organismal process	1	0.8387108415269	0.073	0.017	Biological Process	GO:0051241	negative regulation of multicellular organismal process	0.8387108415269	1	1	59
GO:0008514 organic anion transmembrane transporter activity	1	0.83956211211442	0.055	0.015	Molecular Function	GO:0008514	organic anion transmembrane transporter activity	0.83956211211442	1	1	65
GO:0008283 cell population proliferation	2	0.840666998010026	0.147	0.019	Biological Process	GO:0008283	cell population proliferation	0.840666998010026	1	2	107
GO:0006165 nucleoside diphosphate phosphorylation	4	0.841907504473159	0.294	0.021	Biological Process	GO:0006165	nucleoside diphosphate phosphorylation	0.841907504473159	1	4	193
GO:0009790 embryo development	4	0.841907504473159	0.294	0.021	Biological Process	GO:0009790	embryo development	0.841907504473159	1	4	193
GO:0005319 lipid transporter activity	1	0.844017964556043	0.055	0.015	Molecular Function	GO:0005319	lipid transporter activity	0.844017964556043	1	1	66
GO:0016790 thiolester hydrolase activity	1	0.844017964556043	0.055	0.015	Molecular Function	GO:0016790	thiolester hydrolase activity	0.844017964556043	1	1	66
GO:0009639 response to red or far red light	2	0.8444115568454	0.147	0.019	Biological Process	GO:0009639	response to red or far red light	0.8444115568454	1	2	108
GO:0034968 histone lysine methylation	2	0.8444115568454	0.147	0.019	Biological Process	GO:0034968	histone lysine methylation	0.8444115568454	1	2	108
GO:0018024 histone-lysine N-methyltransferase activity	2	0.845772307472155	0.111	0.017	Molecular Function	GO:0018024	histone-lysine N-methyltransferase activity	0.845772307472155	1	2	119
GO:0042054 histone methyltransferase activity	2	0.845772307472155	0.111	0.017	Molecular Function	GO:0042054	histone methyltransferase activity	0.845772307472155	1	2	119
GO:0042277 peptide binding	1	0.848350131071718	0.055	0.015	Molecular Function	GO:0042277	peptide binding	0.848350131071718	1	1	67
GO:0006473 protein acetylation	1	0.848390741858445	0.073	0.016	Biological Process	GO:0006473	protein acetylation	0.848390741858445	1	1	61
GO:0005811 lipid droplet	1	0.848466682173713	0.098	0.016	Cellular Component	GO:0005811	lipid droplet	0.848466682173713	1	1	61
GO:0046939 nucleotide phosphorylation	4	0.850330471284482	0.294	0.02	Biological Process	GO:0046939	nucleotide phosphorylation	0.850330471284482	1	4	196
GO:0010876 lipid localization	7	0.850957358929118	0.514	0.022	Biological Process	GO:0010876	lipid localization	0.850957358929118	1	7	317
GO:0006720 isoprenoid metabolic process	9	0.851485521844537	0.661	0.023	Biological Process	GO:0006720	isoprenoid metabolic process	0.851485521844537	1	9	395
GO:0031329 regulation of cellular catabolic process	2	0.851661685662677	0.147	0.018	Biological Process	GO:0031329	regulation of cellular catabolic process	0.851661685662677	1	2	110
GO:0006778 porphyrin-containing compound metabolic process	3	0.854001896397466	0.22	0.019	Biological Process	GO:0006778	porphyrin-containing compound metabolic process	0.854001896397466	1	3	155
GO:0009309 amine biosynthetic process	2	0.855170054005715	0.147	0.018	Biological Process	GO:0009309	amine biosynthetic process	0.855170054005715	1	2	111
GO:0042401 cellular biogenic amine biosynthetic process	2	0.855170054005715	0.147	0.018	Biological Process	GO:0042401	cellular biogenic amine biosynthetic process	0.855170054005715	1	2	111
GO:0098655 cation transmembrane transport	16	0.855201193093039	1.175	0.024	Biological Process	GO:0098655	cation transmembrane transport	0.855201193093039	1	16	661
GO:1990351 transporter complex	2	0.855297203898961	0.197	0.018	Cellular Component	GO:1990351	transporter complex	0.855297203898961	1	2	111
GO:0051704 multi-organism process	18	0.855338716785372	1.322	0.024	Biological Process	GO:0051704	multi-organism process	0.855338716785372	1	18	735
GO:0007015 actin filament organization	4	0.855732111871478	0.294	0.02	Biological Process	GO:0007015	actin filament organization	0.855732111871478	1	4	198
GO:0009132 nucleoside diphosphate metabolic process	4	0.860966951672088	0.294	0.02	Biological Process	GO:0009132	nucleoside diphosphate metabolic process	0.860966951672088	1	4	200
GO:0048608 reproductive structure development	15	0.861575784526275	1.101	0.024	Biological Process	GO:0048608	reproductive structure development	0.861575784526275	1	15	628
GO:0061458 reproductive system development	15	0.861575784526275	1.101	0.024	Biological Process	GO:0061458	reproductive system development	0.861575784526275	1	15	628
GO:0098662 inorganic cation transmembrane transport	15	0.861575784526275	1.101	0.024	Biological Process	GO:0098662	inorganic cation transmembrane transport	0.861575784526275	1	15	628
GO:0009086 methionine biosynthetic process	1	0.861833024126612	0.073	0.016	Biological Process	GO:0009086	methionine biosynthetic process	0.861833024126612	1	1	64
GO:0051093 negative regulation of developmental process	1	0.861833024126612	0.073	0.016	Biological Process	GO:0051093	negative regulation of developmental process	0.861833024126612	1	1	64
GO:0070592 cell wall polysaccharide biosynthetic process	1	0.861833024126612	0.073	0.016	Biological Process	GO:0070592	cell wall polysaccharide biosynthetic process	0.861833024126612	1	1	64
GO:0022853 active ion transmembrane transporter activity	10	0.861990830120868	0.555	0.021	Molecular Function	GO:0022853	active ion transmembrane transporter activity	0.861990830120868	1	10	482
GO:0006811 ion transport	42	0.863461525313023	3.084	0.026	Biological Process	GO:0006811	ion transport	0.863461525313023	1	42	1606
GO:0009535 chloroplast thylakoid membrane	10	0.864071789607246	0.983	0.023	Cellular Component	GO:0009535	chloroplast thylakoid membrane	0.864071789607246	1	10	440
GO:0055035 plastid thylakoid membrane	10	0.864071789607246	0.983	0.023	Cellular Component	GO:0055035	plastid thylakoid membrane	0.864071789607246	1	10	440
GO:0016899 oxidoreductase activity, acting on the CH-OH group of donors, oxygen as acceptor	1	0.864509155033808	0.055	0.014	Molecular Function	GO:0016899	oxidoreductase activity, acting on the CH-OH group of donors, oxygen as acceptor	0.864509155033808	1	1	71
GO:0006817 phosphate ion transport	1	0.866043697650723	0.073	0.015	Biological Process	GO:0006817	phosphate ion transport	0.866043697650723	1	1	65
GO:0016831 carboxy-lyase activity	5	0.867318629734035	0.277	0.019	Molecular Function	GO:0016831	carboxy-lyase activity	0.867318629734035	1	5	268
GO:0140658 ATP-dependent chromatin remodeler activity	2	0.867625205062166	0.111	0.016	Molecular Function	GO:0140658	ATP-dependent chromatin remodeler activity	0.867625205062166	1	2	126
GO:0005102 signaling receptor binding	1	0.868272499556968	0.055	0.014	Molecular Function	GO:0005102	signaling receptor binding	0.868272499556968	1	1	72
GO:0005852 eukaryotic translation initiation factor 3 complex	1	0.870201644342749	0.098	0.015	Cellular Component	GO:0005852	eukaryotic translation initiation factor 3 complex	0.870201644342749	1	1	66
GO:0098660 inorganic ion transmembrane transport	16	0.871173844323903	1.175	0.024	Biological Process	GO:0098660	inorganic ion transmembrane transport	0.871173844323903	1	16	672
GO:0051287 NAD binding	5	0.871396891175485	0.277	0.019	Molecular Function	GO:0051287	NAD binding	0.871396891175485	1	5	270
GO:0009856 pollination	12	0.874073431496004	0.881	0.023	Biological Process	GO:0009856	pollination	0.874073431496004	1	12	523
GO:0044706 multi-multicellular organism process	12	0.874073431496004	0.881	0.023	Biological Process	GO:0044706	multi-multicellular organism process	0.874073431496004	1	12	523
GO:0005730 nucleolus	8	0.874460655492126	0.787	0.022	Cellular Component	GO:0005730	nucleolus	0.874460655492126	1	8	368
GO:0004620 phospholipase activity	2	0.876089468028119	0.111	0.016	Molecular Function	GO:0004620	phospholipase activity	0.876089468028119	1	2	129
GO:0009069 serine family amino acid metabolic process	2	0.877677751411478	0.147	0.017	Biological Process	GO:0009069	serine family amino acid metabolic process	0.877677751411478	1	2	118
GO:0008285 negative regulation of cell population proliferation	1	0.877921828700474	0.073	0.015	Biological Process	GO:0008285	negative regulation of cell population proliferation	0.877921828700474	1	1	68
GO:0046942 carboxylic acid transport	1	0.877921828700474	0.073	0.015	Biological Process	GO:0046942	carboxylic acid transport	0.877921828700474	1	1	68
GO:0097526 spliceosomal tri-snRNP complex	1	0.877996933277184	0.098	0.015	Cellular Component	GO:0097526	spliceosomal tri-snRNP complex	0.877996933277184	1	1	68
GO:1990204 oxidoreductase complex	5	0.878290620970589	0.492	0.02	Cellular Component	GO:1990204	oxidoreductase complex	0.878290620970589	1	5	249
GO:0044038 cell wall macromolecule biosynthetic process	1	0.881642524845076	0.073	0.014	Biological Process	GO:0044038	cell wall macromolecule biosynthetic process	0.881642524845076	1	1	69
GO:0046839 phospholipid dephosphorylation	1	0.881642524845076	0.073	0.014	Biological Process	GO:0046839	phospholipid dephosphorylation	0.881642524845076	1	1	69
GO:0046856 phosphatidylinositol dephosphorylation	1	0.881642524845076	0.073	0.014	Biological Process	GO:0046856	phosphatidylinositol dephosphorylation	0.881642524845076	1	1	69
GO:0070589 cellular component macromolecule biosynthetic process	1	0.881642524845076	0.073	0.014	Biological Process	GO:0070589	cellular component macromolecule biosynthetic process	0.881642524845076	1	1	69
GO:1902531 regulation of intracellular signal transduction	1	0.881642524845076	0.073	0.014	Biological Process	GO:1902531	regulation of intracellular signal transduction	0.881642524845076	1	1	69
GO:0140013 meiotic nuclear division	2	0.883489057350421	0.147	0.017	Biological Process	GO:0140013	meiotic nuclear division	0.883489057350421	1	2	120
GO:0004222 metalloendopeptidase activity	4	0.883620792562201	0.222	0.017	Molecular Function	GO:0004222	metalloendopeptidase activity	0.883620792562201	1	4	230
GO:0006555 methionine metabolic process	1	0.885249902408148	0.073	0.014	Biological Process	GO:0006555	methionine metabolic process	0.885249902408148	1	1	70
GO:0042176 regulation of protein catabolic process	1	0.885249902408148	0.073	0.014	Biological Process	GO:0042176	regulation of protein catabolic process	0.885249902408148	1	1	70
GO:0043543 protein acylation	1	0.885249902408148	0.073	0.014	Biological Process	GO:0043543	protein acylation	0.885249902408148	1	1	70
GO:0016571 histone methylation	2	0.886297890449249	0.147	0.017	Biological Process	GO:0016571	histone methylation	0.886297890449249	1	2	121
GO:0010557 positive regulation of macromolecule biosynthetic process	10	0.886554765450046	0.734	0.022	Biological Process	GO:0010557	positive regulation of macromolecule biosynthetic process	0.886554765450046	1	10	454
GO:0008270 zinc ion binding	47	0.887101853654466	2.608	0.024	Molecular Function	GO:0008270	zinc ion binding	0.887101853654466	1	47	1988
GO:0044877 protein-containing complex binding	6	0.887669029409228	0.333	0.019	Molecular Function	GO:0044877	protein-containing complex binding	0.887669029409228	1	6	324
GO:0020037 heme binding	60	0.887799169343398	3.33	0.024	Molecular Function	GO:0020037	heme binding	0.887799169343398	1	60	2494
GO:0042803 protein homodimerization activity	1	0.888757322345089	0.055	0.013	Molecular Function	GO:0042803	protein homodimerization activity	0.888757322345089	1	1	78
GO:0018022 peptidyl-lysine methylation	2	0.889043833941756	0.147	0.016	Biological Process	GO:0018022	peptidyl-lysine methylation	0.889043833941756	1	2	122
GO:0005789 endoplasmic reticulum membrane	11	0.891509647987668	1.082	0.022	Cellular Component	GO:0005789	endoplasmic reticulum membrane	0.891509647987668	1	11	496
GO:0098827 endoplasmic reticulum subcompartment	11	0.891509647987668	1.082	0.022	Cellular Component	GO:0098827	endoplasmic reticulum subcompartment	0.891509647987668	1	11	496
GO:0016209 antioxidant activity	18	0.891949175764127	0.999	0.021	Molecular Function	GO:0016209	antioxidant activity	0.891949175764127	1	18	838
GO:0043631 RNA polyadenylation	1	0.892138392118969	0.073	0.014	Biological Process	GO:0043631	RNA polyadenylation	0.892138392118969	1	1	72
GO:0042175 nuclear outer membrane-endoplasmic reticulum membrane network	11	0.894304334057173	1.082	0.022	Cellular Component	GO:0042175	nuclear outer membrane-endoplasmic reticulum membrane network	0.894304334057173	1	11	498
GO:0030244 cellulose biosynthetic process	2	0.894351927395498	0.147	0.016	Biological Process	GO:0030244	cellulose biosynthetic process	0.894351927395498	1	2	124
GO:0016614 oxidoreductase activity, acting on CH-OH group of donors	9	0.894418762659612	0.499	0.02	Molecular Function	GO:0016614	oxidoreductase activity, acting on CH-OH group of donors	0.894418762659612	1	9	461
GO:0006721 terpenoid metabolic process	6	0.894628819102592	0.441	0.02	Biological Process	GO:0006721	terpenoid metabolic process	0.894628819102592	1	6	299
GO:0016776 phosphotransferase activity, phosphate group as acceptor	1	0.894851867264713	0.055	0.013	Molecular Function	GO:0016776	phosphotransferase activity, phosphate group as acceptor	0.894851867264713	1	1	80
GO:0048522 positive regulation of cellular process	18	0.896122103202796	1.322	0.023	Biological Process	GO:0048522	positive regulation of cellular process	0.896122103202796	1	18	767
GO:0000819 sister chromatid segregation	2	0.896916474546138	0.147	0.016	Biological Process	GO:0000819	sister chromatid segregation	0.896916474546138	1	2	125
GO:0015103 inorganic anion transmembrane transporter activity	4	0.896969678282917	0.222	0.017	Molecular Function	GO:0015103	inorganic anion transmembrane transporter activity	0.896969678282917	1	4	237
GO:0042170 plastid membrane	12	0.897269004376993	1.18	0.022	Cellular Component	GO:0042170	plastid membrane	0.897269004376993	1	12	539
GO:0003690 double-stranded DNA binding	17	0.897428963176197	0.943	0.021	Molecular Function	GO:0003690	double-stranded DNA binding	0.897428963176197	1	17	802
GO:0033013 tetrapyrrole metabolic process	3	0.897801284737825	0.22	0.017	Biological Process	GO:0033013	tetrapyrrole metabolic process	0.897801284737825	1	3	172
GO:0042446 hormone biosynthetic process	1	0.898613648639627	0.073	0.014	Biological Process	GO:0042446	hormone biosynthetic process	0.898613648639627	1	1	74
GO:0070647 protein modification by small protein conjugation or removal	42	0.898745457747975	3.084	0.026	Biological Process	GO:0070647	protein modification by small protein conjugation or removal	0.898745457747975	1	42	1647
GO:0032502 developmental process	54	0.89950426698853	3.965	0.026	Biological Process	GO:0032502	developmental process	0.89950426698853	1	54	2076
GO:0004197 cysteine-type endopeptidase activity	1	0.900612691361178	0.055	0.012	Molecular Function	GO:0004197	cysteine-type endopeptidase activity	0.900612691361178	1	1	82
GO:0030036 actin cytoskeleton organization	4	0.901167265808848	0.294	0.018	Biological Process	GO:0030036	actin cytoskeleton organization	0.901167265808848	1	4	218
GO:0015293 symporter activity	1	0.903373705300178	0.055	0.012	Molecular Function	GO:0015293	symporter activity	0.903373705300178	1	1	83
GO:0031331 positive regulation of cellular catabolic process	1	0.904700444272693	0.073	0.013	Biological Process	GO:0031331	positive regulation of cellular catabolic process	0.904700444272693	1	1	76
GO:0009888 tissue development	8	0.904772598066634	0.587	0.021	Biological Process	GO:0009888	tissue development	0.904772598066634	1	8	387
GO:0031399 regulation of protein modification process	3	0.906215014200123	0.22	0.017	Biological Process	GO:0031399	regulation of protein modification process	0.906215014200123	1	3	176
GO:0071949 FAD binding	5	0.906632357765323	0.277	0.017	Molecular Function	GO:0071949	FAD binding	0.906632357765323	1	5	290
GO:0030029 actin filament-based process	4	0.906765597987852	0.294	0.018	Biological Process	GO:0030029	actin filament-based process	0.906765597987852	1	4	221
GO:0016278 lysine N-methyltransferase activity	2	0.907291325602196	0.111	0.014	Molecular Function	GO:0016278	lysine N-methyltransferase activity	0.907291325602196	1	2	142
GO:0016279 protein-lysine N-methyltransferase activity	2	0.907291325602196	0.111	0.014	Molecular Function	GO:0016279	protein-lysine N-methyltransferase activity	0.907291325602196	1	2	142
GO:0016298 lipase activity	3	0.907557082082857	0.166	0.015	Molecular Function	GO:0016298	lipase activity	0.907557082082857	1	3	194
GO:0009896 positive regulation of catabolic process	1	0.907605502350146	0.073	0.013	Biological Process	GO:0009896	positive regulation of catabolic process	0.907605502350146	1	1	77
GO:0045893 positive regulation of transcription, DNA-templated	9	0.908604307349593	0.661	0.021	Biological Process	GO:0045893	positive regulation of transcription, DNA-templated	0.908604307349593	1	9	430
GO:1902680 positive regulation of RNA biosynthetic process	9	0.908604307349593	0.661	0.021	Biological Process	GO:1902680	positive regulation of RNA biosynthetic process	0.908604307349593	1	9	430
GO:1903508 positive regulation of nucleic acid-templated transcription	9	0.908604307349593	0.661	0.021	Biological Process	GO:1903508	positive regulation of nucleic acid-templated transcription	0.908604307349593	1	9	430
GO:0006302 double-strand break repair	2	0.908890679541332	0.147	0.015	Biological Process	GO:0006302	double-strand break repair	0.908890679541332	1	2	130
GO:0009893 positive regulation of metabolic process	14	0.909601909879884	1.028	0.022	Biological Process	GO:0009893	positive regulation of metabolic process	0.909601909879884	1	14	627
GO:0005773 vacuole	12	0.909649122392062	1.18	0.022	Cellular Component	GO:0005773	vacuole	0.909649122392062	1	12	549
GO:0008194 UDP-glycosyltransferase activity	29	0.909669495916154	1.609	0.022	Molecular Function	GO:0008194	UDP-glycosyltransferase activity	0.909669495916154	1	29	1306
GO:0009894 regulation of catabolic process	2	0.911123684320901	0.147	0.015	Biological Process	GO:0009894	regulation of catabolic process	0.911123684320901	1	2	131
GO:0045935 positive regulation of nucleobase-containing compound metabolic process	10	0.911294616035573	0.734	0.021	Biological Process	GO:0045935	positive regulation of nucleobase-containing compound metabolic process	0.911294616035573	1	10	472
GO:0022890 inorganic cation transmembrane transporter activity	22	0.912633724032687	1.221	0.021	Molecular Function	GO:0022890	inorganic cation transmembrane transporter activity	0.912633724032687	1	22	1025
GO:0072665 protein localization to vacuole	1	0.915800410867765	0.073	0.013	Biological Process	GO:0072665	protein localization to vacuole	0.915800410867765	1	1	80
GO:0072666 establishment of protein localization to vacuole	1	0.915800410867765	0.073	0.013	Biological Process	GO:0072666	establishment of protein localization to vacuole	0.915800410867765	1	1	80
GO:0005216 ion channel activity	8	0.917182290144653	0.444	0.018	Molecular Function	GO:0005216	ion channel activity	0.917182290144653	1	8	435
GO:0008146 sulfotransferase activity	2	0.917203613351139	0.111	0.014	Molecular Function	GO:0008146	sulfotransferase activity	0.917203613351139	1	2	147
GO:0006090 pyruvate metabolic process	4	0.920341458708956	0.294	0.017	Biological Process	GO:0006090	pyruvate metabolic process	0.920341458708956	1	4	229
GO:0042127 regulation of cell population proliferation	1	0.920856056421197	0.073	0.012	Biological Process	GO:0042127	regulation of cell population proliferation	0.920856056421197	1	1	82
GO:0035673 oligopeptide transmembrane transporter activity	2	0.920882291888881	0.111	0.013	Molecular Function	GO:0035673	oligopeptide transmembrane transporter activity	0.920882291888881	1	2	149
GO:1904680 peptide transmembrane transporter activity	2	0.920882291888881	0.111	0.013	Molecular Function	GO:1904680	peptide transmembrane transporter activity	0.920882291888881	1	2	149
GO:0005622 intracellular anatomical structure	493	0.922533816129274	48.476	0.029	Cellular Component	GO:0005622	intracellular anatomical structure	0.922533816129274	1	493	16917
GO:0055029 nuclear DNA-directed RNA polymerase complex	3	0.92636332476068	0.295	0.016	Cellular Component	GO:0055029	nuclear DNA-directed RNA polymerase complex	0.92636332476068	1	3	187
GO:0008324 cation transmembrane transporter activity	23	0.928705253036126	1.276	0.021	Molecular Function	GO:0008324	cation transmembrane transporter activity	0.928705253036126	1	23	1088
GO:0032501 multicellular organismal process	58	0.930267466816839	4.258	0.026	Biological Process	GO:0032501	multicellular organismal process	0.930267466816839	1	58	2271
GO:0008509 anion transmembrane transporter activity	5	0.931977721213934	0.277	0.016	Molecular Function	GO:0008509	anion transmembrane transporter activity	0.931977721213934	1	5	309
GO:0010604 positive regulation of macromolecule metabolic process	13	0.93244796322826	0.954	0.021	Biological Process	GO:0010604	positive regulation of macromolecule metabolic process	0.93244796322826	1	13	611
GO:0034622 cellular protein-containing complex assembly	23	0.933838694915729	1.689	0.023	Biological Process	GO:0034622	cellular protein-containing complex assembly	0.933838694915729	1	23	998
GO:0042887 amide transmembrane transporter activity	2	0.934110943071626	0.111	0.013	Molecular Function	GO:0042887	amide transmembrane transporter activity	0.934110943071626	1	2	157
GO:0000981 DNA-binding transcription factor activity, RNA polymerase II-specific	5	0.934251583781092	0.277	0.016	Molecular Function	GO:0000981	DNA-binding transcription factor activity, RNA polymerase II-specific	0.934251583781092	1	5	311
GO:0006091 generation of precursor metabolites and energy	25	0.935592704962726	1.836	0.023	Biological Process	GO:0006091	generation of precursor metabolites and energy	0.935592704962726	1	25	1076
GO:0048831 regulation of shoot system development	2	0.935843646738663	0.147	0.014	Biological Process	GO:0048831	regulation of shoot system development	0.935843646738663	1	2	144
GO:0016491 oxidoreductase activity	164	0.936923679365074	9.101	0.025	Molecular Function	GO:0016491	oxidoreductase activity	0.936923679365074	1	164	6583
GO:0042743 hydrogen peroxide metabolic process	14	0.937159506465057	1.028	0.021	Biological Process	GO:0042743	hydrogen peroxide metabolic process	0.937159506465057	1	14	656
GO:0006694 steroid biosynthetic process	1	0.938221648655019	0.073	0.011	Biological Process	GO:0006694	steroid biosynthetic process	0.938221648655019	1	1	90
GO:0043021 ribonucleoprotein complex binding	1	0.938439854665763	0.055	0.01	Molecular Function	GO:0043021	ribonucleoprotein complex binding	0.938439854665763	1	1	99
GO:0097435 supramolecular fiber organization	4	0.938653770886279	0.294	0.017	Biological Process	GO:0097435	supramolecular fiber organization	0.938653770886279	1	4	242
GO:0007275 multicellular organism development	39	0.938981548683472	2.863	0.024	Biological Process	GO:0007275	multicellular organism development	0.938981548683472	1	39	1601
GO:0006629 lipid metabolic process	57	0.940920487619306	4.185	0.025	Biological Process	GO:0006629	lipid metabolic process	0.940920487619306	1	57	2258
GO:0033218 amide binding	1	0.943430480455302	0.055	0.01	Molecular Function	GO:0033218	amide binding	0.943430480455302	1	1	102
GO:0000413 protein peptidyl-prolyl isomerization	1	0.943702610873769	0.073	0.011	Biological Process	GO:0000413	protein peptidyl-prolyl isomerization	0.943702610873769	1	1	93
GO:0043624 cellular protein complex disassembly	1	0.943702610873769	0.073	0.011	Biological Process	GO:0043624	cellular protein complex disassembly	0.943702610873769	1	1	93
GO:0031461 cullin-RING ubiquitin ligase complex	1	0.94376562075026	0.098	0.011	Cellular Component	GO:0031461	cullin-RING ubiquitin ligase complex	0.94376562075026	1	1	93
GO:0051254 positive regulation of RNA metabolic process	9	0.945946975887203	0.661	0.019	Biological Process	GO:0051254	positive regulation of RNA metabolic process	0.945946975887203	1	9	465
GO:0009534 chloroplast thylakoid	10	0.946070829587282	0.983	0.02	Cellular Component	GO:0009534	chloroplast thylakoid	0.946070829587282	1	10	506
GO:0031976 plastid thylakoid	10	0.946070829587282	0.983	0.02	Cellular Component	GO:0031976	plastid thylakoid	0.946070829587282	1	10	506
GO:0015399 primary active transmembrane transporter activity	18	0.946241350486031	0.999	0.02	Molecular Function	GO:0015399	primary active transmembrane transporter activity	0.946241350486031	1	18	906
GO:0006367 transcription initiation from RNA polymerase II promoter	1	0.947083876863116	0.073	0.011	Biological Process	GO:0006367	transcription initiation from RNA polymerase II promoter	0.947083876863116	1	1	95
GO:1903046 meiotic cell cycle process	2	0.947651492004561	0.147	0.013	Biological Process	GO:1903046	meiotic cell cycle process	0.947651492004561	1	2	152
GO:0004521 endoribonuclease activity	3	0.948440598888265	0.166	0.013	Molecular Function	GO:0004521	endoribonuclease activity	0.948440598888265	1	3	223
GO:0003729 mRNA binding	6	0.948691819927811	0.333	0.016	Molecular Function	GO:0003729	mRNA binding	0.948691819927811	1	6	374
GO:0034754 cellular hormone metabolic process	1	0.948697628452029	0.073	0.01	Biological Process	GO:0034754	cellular hormone metabolic process	0.948697628452029	1	1	96
GO:0006325 chromatin organization	10	0.948885754772349	0.734	0.02	Biological Process	GO:0006325	chromatin organization	0.948885754772349	1	10	510
GO:0140104 molecular carrier activity	1	0.949461352510383	0.055	0.009	Molecular Function	GO:0140104	molecular carrier activity	0.949461352510383	1	1	106
GO:0006749 glutathione metabolic process	4	0.950037384317961	0.294	0.016	Biological Process	GO:0006749	glutathione metabolic process	0.950037384317961	1	4	252
GO:0034641 cellular nitrogen compound metabolic process	334	0.951225637985036	24.523	0.028	Biological Process	GO:0034641	cellular nitrogen compound metabolic process	0.951225637985036	1	334	11827
GO:0010038 response to metal ion	2	0.951520562880422	0.147	0.013	Biological Process	GO:0010038	response to metal ion	0.951520562880422	1	2	155
GO:0006346 DNA methylation-dependent heterochromatin assembly	1	0.95177909348935	0.073	0.01	Biological Process	GO:0006346	DNA methylation-dependent heterochromatin assembly	0.95177909348935	1	1	98
GO:0080188 gene silencing by RNA-directed DNA methylation	1	0.95177909348935	0.073	0.01	Biological Process	GO:0080188	gene silencing by RNA-directed DNA methylation	0.95177909348935	1	1	98
GO:0140458 pre-transcriptional gene silencing by RNA	1	0.95177909348935	0.073	0.01	Biological Process	GO:0140458	pre-transcriptional gene silencing by RNA	0.95177909348935	1	1	98
GO:0051173 positive regulation of nitrogen compound metabolic process	12	0.951988732567316	0.881	0.02	Biological Process	GO:0051173	positive regulation of nitrogen compound metabolic process	0.951988732567316	1	12	596
GO:0004176 ATP-dependent peptidase activity	1	0.952231343265573	0.055	0.009	Molecular Function	GO:0004176	ATP-dependent peptidase activity	0.952231343265573	1	1	108
GO:0098813 nuclear chromosome segregation	2	0.952748420929551	0.147	0.013	Biological Process	GO:0098813	nuclear chromosome segregation	0.952748420929551	1	2	156
GO:0034220 ion transmembrane transport	17	0.953017589453449	1.248	0.021	Biological Process	GO:0034220	ion transmembrane transport	0.953017589453449	1	17	797
GO:0006366 transcription by RNA polymerase II	16	0.953852134106837	1.175	0.021	Biological Process	GO:0006366	transcription by RNA polymerase II	0.953852134106837	1	16	759
GO:0018208 peptidyl-proline modification	1	0.954675598751017	0.073	0.01	Biological Process	GO:0018208	peptidyl-proline modification	0.954675598751017	1	1	100
GO:0003697 single-stranded DNA binding	1	0.954849592229974	0.055	0.009	Molecular Function	GO:0003697	single-stranded DNA binding	0.954849592229974	1	1	110
GO:0010605 negative regulation of macromolecule metabolic process	20	0.955136846737817	1.468	0.022	Biological Process	GO:0010605	negative regulation of macromolecule metabolic process	0.955136846737817	1	20	918
GO:0015267 channel activity	10	0.95544549601145	0.555	0.018	Molecular Function	GO:0015267	channel activity	0.95544549601145	1	10	570
GO:0022803 passive transmembrane transporter activity	10	0.95544549601145	0.555	0.018	Molecular Function	GO:0022803	passive transmembrane transporter activity	0.95544549601145	1	10	570
GO:0016879 ligase activity, forming carbon-nitrogen bonds	2	0.95558920243786	0.111	0.011	Molecular Function	GO:0016879	ligase activity, forming carbon-nitrogen bonds	0.95558920243786	1	2	174
GO:0016192 vesicle-mediated transport	20	0.955662383460363	1.468	0.022	Biological Process	GO:0016192	vesicle-mediated transport	0.955662383460363	1	20	919
GO:0045944 positive regulation of transcription by RNA polymerase II	4	0.955901573005614	0.294	0.016	Biological Process	GO:0045944	positive regulation of transcription by RNA polymerase II	0.955901573005614	1	4	258
GO:0070469 respirasome	3	0.956105639227704	0.295	0.014	Cellular Component	GO:0070469	respirasome	0.956105639227704	1	3	210
GO:0016765 transferase activity, transferring alkyl or aryl (other than methyl) groups	8	0.956301835797229	0.444	0.017	Molecular Function	GO:0016765	transferase activity, transferring alkyl or aryl (other than methyl) groups	0.956301835797229	1	8	479
GO:0010817 regulation of hormone levels	3	0.956977997807293	0.22	0.014	Biological Process	GO:0010817	regulation of hormone levels	0.956977997807293	1	3	211
GO:0031325 positive regulation of cellular metabolic process	12	0.95716947676279	0.881	0.02	Biological Process	GO:0031325	positive regulation of cellular metabolic process	0.95716947676279	1	12	604
GO:0000228 nuclear chromosome	1	0.957455210439039	0.098	0.01	Cellular Component	GO:0000228	nuclear chromosome	0.957455210439039	1	1	102
GO:0003954 NADH dehydrogenase activity	3	0.958957596388703	0.166	0.013	Molecular Function	GO:0003954	NADH dehydrogenase activity	0.958957596388703	1	3	234
GO:0006413 translational initiation	2	0.95951365684418	0.147	0.012	Biological Process	GO:0006413	translational initiation	0.95951365684418	1	2	162
GO:0004540 ribonuclease activity	5	0.959648454851581	0.277	0.015	Molecular Function	GO:0004540	ribonuclease activity	0.959648454851581	1	5	339
GO:0018205 peptidyl-lysine modification	3	0.9607539389729	0.22	0.014	Biological Process	GO:0018205	peptidyl-lysine modification	0.9607539389729	1	3	215
GO:0006914 autophagy	1	0.961178842146557	0.073	0.01	Biological Process	GO:0006914	autophagy	0.961178842146557	1	1	105
GO:0061919 process utilizing autophagic mechanism	1	0.961178842146557	0.073	0.01	Biological Process	GO:0061919	process utilizing autophagic mechanism	0.961178842146557	1	1	105
GO:0009057 macromolecule catabolic process	36	0.96121845469474	2.643	0.023	Biological Process	GO:0009057	macromolecule catabolic process	0.96121845469474	1	36	1540
GO:0003743 translation initiation factor activity	2	0.961425859035502	0.111	0.011	Molecular Function	GO:0003743	translation initiation factor activity	0.961425859035502	1	2	180
GO:0051274 beta-glucan biosynthetic process	2	0.961554712757691	0.147	0.012	Biological Process	GO:0051274	beta-glucan biosynthetic process	0.961554712757691	1	2	164
GO:0048507 meristem development	3	0.961648050969447	0.22	0.014	Biological Process	GO:0048507	meristem development	0.961648050969447	1	3	216
GO:0009808 lignin metabolic process	1	0.9635110887085	0.073	0.009	Biological Process	GO:0009808	lignin metabolic process	0.9635110887085	1	1	107
GO:0043085 positive regulation of catalytic activity	1	0.9635110887085	0.073	0.009	Biological Process	GO:0043085	positive regulation of catalytic activity	0.9635110887085	1	1	107
GO:0072593 reactive oxygen species metabolic process	14	0.966122442620885	1.028	0.02	Biological Process	GO:0072593	reactive oxygen species metabolic process	0.966122442620885	1	14	702
GO:0006575 cellular modified amino acid metabolic process	5	0.96643287006949	0.367	0.016	Biological Process	GO:0006575	cellular modified amino acid metabolic process	0.96643287006949	1	5	318
GO:0043094 cellular metabolic compound salvage	1	0.966749571807612	0.073	0.009	Biological Process	GO:0043094	cellular metabolic compound salvage	0.966749571807612	1	1	110
GO:0009892 negative regulation of metabolic process	20	0.966769660613241	1.468	0.021	Biological Process	GO:0009892	negative regulation of metabolic process	0.966769660613241	1	20	943
GO:0008374 O-acyltransferase activity	5	0.967479389809464	0.277	0.014	Molecular Function	GO:0008374	O-acyltransferase activity	0.967479389809464	1	5	351
GO:0051321 meiotic cell cycle	2	0.967948100856995	0.147	0.012	Biological Process	GO:0051321	meiotic cell cycle	0.967948100856995	1	2	171
GO:0097525 spliceosomal snRNP complex	1	0.968797446499796	0.098	0.009	Cellular Component	GO:0097525	spliceosomal snRNP complex	0.968797446499796	1	1	112
GO:0043229 intracellular organelle	399	0.969170196385233	39.233	0.028	Cellular Component	GO:0043229	intracellular organelle	0.969170196385233	1	399	14044
GO:0000428 DNA-directed RNA polymerase complex	3	0.969697698256585	0.295	0.013	Cellular Component	GO:0000428	DNA-directed RNA polymerase complex	0.969697698256585	1	3	226
GO:0009067 aspartate family amino acid biosynthetic process	1	0.969700823537279	0.073	0.009	Biological Process	GO:0009067	aspartate family amino acid biosynthetic process	0.969700823537279	1	1	113
GO:0043226 organelle	399	0.969978410828399	39.233	0.028	Cellular Component	GO:0043226	organelle	0.969978410828399	1	399	14050
GO:0031123 RNA 3'-end processing	1	0.970625212094101	0.073	0.009	Biological Process	GO:0031123	RNA 3'-end processing	0.970625212094101	1	1	114
GO:0046700 heterocycle catabolic process	5	0.97081840737645	0.367	0.015	Biological Process	GO:0046700	heterocycle catabolic process	0.97081840737645	1	5	325
GO:0044093 positive regulation of molecular function	1	0.971521418830534	0.073	0.009	Biological Process	GO:0044093	positive regulation of molecular function	0.971521418830534	1	1	115
GO:0030532 small nuclear ribonucleoprotein complex	1	0.971569450339889	0.098	0.009	Cellular Component	GO:0030532	small nuclear ribonucleoprotein complex	0.971569450339889	1	1	115
GO:0051119 sugar transmembrane transporter activity	1	0.972039865494965	0.055	0.008	Molecular Function	GO:0051119	sugar transmembrane transporter activity	0.972039865494965	1	1	127
GO:0008276 protein methyltransferase activity	2	0.97297006228678	0.111	0.01	Molecular Function	GO:0008276	protein methyltransferase activity	0.97297006228678	1	2	195
GO:0017004 cytochrome complex assembly	1	0.973232694971185	0.073	0.009	Biological Process	GO:0017004	cytochrome complex assembly	0.973232694971185	1	1	117
GO:0031507 heterochromatin assembly	1	0.973232694971185	0.073	0.009	Biological Process	GO:0031507	heterochromatin assembly	0.973232694971185	1	1	117
GO:0070828 heterochromatin organization	1	0.973232694971185	0.073	0.009	Biological Process	GO:0070828	heterochromatin organization	0.973232694971185	1	1	117
GO:0098656 anion transmembrane transport	1	0.973232694971185	0.073	0.009	Biological Process	GO:0098656	anion transmembrane transport	0.973232694971185	1	1	117
GO:0051301 cell division	2	0.973311	0.147	0.011	Biological Process	GO:0051301	cell division	0.973311	1	2	178
GO:0005096 GTPase activator activity	2	0.973607634386056	0.111	0.01	Molecular Function	GO:0005096	GTPase activator activity	0.973607634386056	1	2	196
GO:0044270 cellular nitrogen compound catabolic process	5	0.973619094111452	0.367	0.015	Biological Process	GO:0044270	cellular nitrogen compound catabolic process	0.973619094111452	1	5	330
GO:0016835 carbon-oxygen lyase activity	7	0.97362186534301	0.388	0.015	Molecular Function	GO:0016835	carbon-oxygen lyase activity	0.97362186534301	1	7	463
GO:0120114 Sm-like protein family complex	1	0.974095412625431	0.098	0.008	Cellular Component	GO:0120114	Sm-like protein family complex	0.974095412625431	1	1	118
GO:0016782 transferase activity, transferring sulphur-containing groups	2	0.974230661731697	0.111	0.01	Molecular Function	GO:0016782	transferase activity, transferring sulphur-containing groups	0.974230661731697	1	2	197
GO:0051537 2 iron, 2 sulfur cluster binding	1	0.974307520196543	0.055	0.008	Molecular Function	GO:0051537	2 iron, 2 sulfur cluster binding	0.974307520196543	1	1	130
GO:0006820 anion transport	5	0.974667750760665	0.367	0.015	Biological Process	GO:0006820	anion transport	0.974667750760665	1	5	332
GO:0046915 transition metal ion transmembrane transporter activity	1	0.975021794759254	0.055	0.008	Molecular Function	GO:0046915	transition metal ion transmembrane transporter activity	0.975021794759254	1	1	131
GO:0006479 protein methylation	2	0.975974892322528	0.147	0.011	Biological Process	GO:0006479	protein methylation	0.975974892322528	1	2	182
GO:0008213 protein alkylation	2	0.975974892322528	0.147	0.011	Biological Process	GO:0008213	protein alkylation	0.975974892322528	1	2	182
GO:0033865 nucleoside bisphosphate metabolic process	1	0.976353134966555	0.073	0.008	Biological Process	GO:0033865	nucleoside bisphosphate metabolic process	0.976353134966555	1	1	121
GO:0033875 ribonucleoside bisphosphate metabolic process	1	0.976353134966555	0.073	0.008	Biological Process	GO:0033875	ribonucleoside bisphosphate metabolic process	0.976353134966555	1	1	121
GO:0034032 purine nucleoside bisphosphate metabolic process	1	0.976353134966555	0.073	0.008	Biological Process	GO:0034032	purine nucleoside bisphosphate metabolic process	0.976353134966555	1	1	121
GO:0007059 chromosome segregation	2	0.976599565164495	0.147	0.011	Biological Process	GO:0007059	chromosome segregation	0.976599565164495	1	2	183
GO:0045814 negative regulation of gene expression, epigenetic	1	0.977074699437834	0.073	0.008	Biological Process	GO:0045814	negative regulation of gene expression, epigenetic	0.977074699437834	1	1	122
GO:0030880 RNA polymerase complex	3	0.977165988516166	0.295	0.013	Cellular Component	GO:0030880	RNA polymerase complex	0.977165988516166	1	3	238
GO:0009526 plastid envelope	14	0.978836049639804	1.377	0.019	Cellular Component	GO:0009526	plastid envelope	0.978836049639804	1	14	734
GO:0007166 cell surface receptor signaling pathway	10	0.978867758519059	0.734	0.018	Biological Process	GO:0007166	cell surface receptor signaling pathway	0.978867758519059	1	10	566
GO:0098791 Golgi apparatus subcompartment	1	0.97915146139566	0.098	0.008	Cellular Component	GO:0098791	Golgi apparatus subcompartment	0.97915146139566	1	1	125
GO:0010498 proteasomal protein catabolic process	3	0.979154875494671	0.22	0.012	Biological Process	GO:0010498	proteasomal protein catabolic process	0.979154875494671	1	3	242
GO:0015932 nucleobase-containing compound transmembrane transporter activity	1	0.980065929975465	0.055	0.007	Molecular Function	GO:0015932	nucleobase-containing compound transmembrane transporter activity	0.980065929975465	1	1	139
GO:0015711 organic anion transport	1	0.980365593772931	0.073	0.008	Biological Process	GO:0015711	organic anion transport	0.980365593772931	1	1	127
GO:0032270 positive regulation of cellular protein metabolic process	1	0.980365593772931	0.073	0.008	Biological Process	GO:0032270	positive regulation of cellular protein metabolic process	0.980365593772931	1	1	127
GO:0000151 ubiquitin ligase complex	1	0.980405744843249	0.098	0.008	Cellular Component	GO:0000151	ubiquitin ligase complex	0.980405744843249	1	1	127
GO:0009066 aspartate family amino acid metabolic process	1	0.980964801939846	0.073	0.008	Biological Process	GO:0009066	aspartate family amino acid metabolic process	0.980964801939846	1	1	128
GO:0051247 positive regulation of protein metabolic process	1	0.980964801939846	0.073	0.008	Biological Process	GO:0051247	positive regulation of protein metabolic process	0.980964801939846	1	1	128
GO:0004499 N,N-dimethylaniline monooxygenase activity	1	0.98115905201591	0.055	0.007	Molecular Function	GO:0004499	N,N-dimethylaniline monooxygenase activity	0.98115905201591	1	1	141
GO:0004650 polygalacturonase activity	1	0.98115905201591	0.055	0.007	Molecular Function	GO:0004650	polygalacturonase activity	0.98115905201591	1	1	141
GO:1901505 carbohydrate derivative transmembrane transporter activity	1	0.98115905201591	0.055	0.007	Molecular Function	GO:1901505	carbohydrate derivative transmembrane transporter activity	0.98115905201591	1	1	141
GO:0005507 copper ion binding	3	0.981369603015763	0.166	0.011	Molecular Function	GO:0005507	copper ion binding	0.981369603015763	1	3	271
GO:0032984 protein-containing complex disassembly	1	0.981545736325388	0.073	0.008	Biological Process	GO:0032984	protein-containing complex disassembly	0.981545736325388	1	1	129
GO:0061024 membrane organization	2	0.981557307616214	0.147	0.01	Biological Process	GO:0061024	membrane organization	0.981557307616214	1	2	192
GO:0140534 endoplasmic reticulum protein-containing complex	1	0.981584638192893	0.098	0.008	Cellular Component	GO:0140534	endoplasmic reticulum protein-containing complex	0.981584638192893	1	1	129
GO:0032269 negative regulation of cellular protein metabolic process	5	0.981761172238408	0.367	0.014	Biological Process	GO:0032269	negative regulation of cellular protein metabolic process	0.981761172238408	1	5	348
GO:0051248 negative regulation of protein metabolic process	5	0.981761172238408	0.367	0.014	Biological Process	GO:0051248	negative regulation of protein metabolic process	0.981761172238408	1	5	348
GO:0008408 3'-5' exonuclease activity	2	0.982031003141898	0.111	0.009	Molecular Function	GO:0008408	3'-5' exonuclease activity	0.982031003141898	1	2	212
GO:0018193 peptidyl-amino acid modification	7	0.982251393510656	0.514	0.016	Biological Process	GO:0018193	peptidyl-amino acid modification	0.982251393510656	1	7	443
GO:0030258 lipid modification	1	0.982654994354445	0.073	0.008	Biological Process	GO:0030258	lipid modification	0.982654994354445	1	1	131
GO:0051536 iron-sulfur cluster binding	4	0.982691494507603	0.222	0.012	Molecular Function	GO:0051536	iron-sulfur cluster binding	0.982691494507603	1	4	331
GO:0051540 metal cluster binding	4	0.982691494507603	0.222	0.012	Molecular Function	GO:0051540	metal cluster binding	0.982691494507603	1	4	331
GO:0006261 DNA-dependent DNA replication	1	0.983184381417509	0.073	0.008	Biological Process	GO:0006261	DNA-dependent DNA replication	0.983184381417509	1	1	132
GO:0008610 lipid biosynthetic process	25	0.983590554149968	1.836	0.021	Biological Process	GO:0008610	lipid biosynthetic process	0.983590554149968	1	25	1198
GO:0015144 carbohydrate transmembrane transporter activity	2	0.983688901561599	0.111	0.009	Molecular Function	GO:0015144	carbohydrate transmembrane transporter activity	0.983688901561599	1	2	216
GO:0046914 transition metal ion binding	102	0.984001989353044	5.66	0.023	Molecular Function	GO:0046914	transition metal ion binding	0.984001989353044	1	102	4458
GO:0034357 photosynthetic membrane	14	0.984528455485577	1.377	0.019	Cellular Component	GO:0034357	photosynthetic membrane	0.984528455485577	1	14	755
GO:0030695 GTPase regulator activity	2	0.984833751080422	0.111	0.009	Molecular Function	GO:0030695	GTPase regulator activity	0.984833751080422	1	2	219
GO:0060589 nucleoside-triphosphatase regulator activity	2	0.984833751080422	0.111	0.009	Molecular Function	GO:0060589	nucleoside-triphosphatase regulator activity	0.984833751080422	1	2	219
GO:0043161 proteasome-mediated ubiquitin-dependent protein catabolic process	2	0.985096052074913	0.147	0.01	Biological Process	GO:0043161	proteasome-mediated ubiquitin-dependent protein catabolic process	0.985096052074913	1	2	200
GO:0007005 mitochondrion organization	2	0.985871849825965	0.147	0.01	Biological Process	GO:0007005	mitochondrion organization	0.985871849825965	1	2	202
GO:0008135 translation factor activity, RNA binding	3	0.986291013059908	0.166	0.011	Molecular Function	GO:0008135	translation factor activity, RNA binding	0.986291013059908	1	3	285
GO:0090079 translation regulator activity, nucleic acid binding	3	0.986291013059908	0.166	0.011	Molecular Function	GO:0090079	translation regulator activity, nucleic acid binding	0.986291013059908	1	3	285
GO:0016810 hydrolase activity, acting on carbon-nitrogen (but not peptide) bonds	3	0.986590106983914	0.166	0.01	Molecular Function	GO:0016810	hydrolase activity, acting on carbon-nitrogen (but not peptide) bonds	0.986590106983914	1	3	286
GO:0016570 histone modification	3	0.986801639928769	0.22	0.011	Biological Process	GO:0016570	histone modification	0.986801639928769	1	3	261
GO:0007034 vacuolar transport	1	0.986877727979345	0.073	0.007	Biological Process	GO:0007034	vacuolar transport	0.986877727979345	1	1	140
GO:0009909 regulation of flower development	1	0.986877727979345	0.073	0.007	Biological Process	GO:0009909	regulation of flower development	0.986877727979345	1	1	140
GO:0008170 N-methyltransferase activity	2	0.986893622705948	0.111	0.009	Molecular Function	GO:0008170	N-methyltransferase activity	0.986893622705948	1	2	225
GO:0009657 plastid organization	2	0.98696234191137	0.147	0.01	Biological Process	GO:0009657	plastid organization	0.98696234191137	1	2	205
GO:0004843 thiol-dependent deubiquitinase	1	0.987305117686285	0.055	0.006	Molecular Function	GO:0004843	thiol-dependent deubiquitinase	0.987305117686285	1	1	155
GO:0046474 glycerophospholipid biosynthetic process	2	0.987307276059722	0.147	0.01	Biological Process	GO:0046474	glycerophospholipid biosynthetic process	0.987307276059722	1	2	206
GO:0000139 Golgi membrane	4	0.987329728020528	0.393	0.013	Cellular Component	GO:0000139	Golgi membrane	0.987329728020528	1	4	315
GO:0015075 ion transmembrane transporter activity	29	0.98744534554922	1.609	0.019	Molecular Function	GO:0015075	ion transmembrane transporter activity	0.98744534554922	1	29	1514
GO:0045182 translation regulator activity	3	0.987450242758064	0.166	0.01	Molecular Function	GO:0045182	translation regulator activity	0.987450242758064	1	3	289
GO:0009941 chloroplast envelope	5	0.987588522460054	0.492	0.014	Cellular Component	GO:0009941	chloroplast envelope	0.987588522460054	1	5	366
GO:0043648 dicarboxylic acid metabolic process	1	0.987666679466211	0.073	0.007	Biological Process	GO:0043648	dicarboxylic acid metabolic process	0.987666679466211	1	1	142
GO:0042744 hydrogen peroxide catabolic process	11	0.987678669605725	0.808	0.017	Biological Process	GO:0042744	hydrogen peroxide catabolic process	0.987678669605725	1	11	642
GO:0016853 isomerase activity	10	0.987683059057678	0.555	0.015	Molecular Function	GO:0016853	isomerase activity	0.987683059057678	1	10	657
GO:0016114 terpenoid biosynthetic process	3	0.987730268860644	0.22	0.011	Biological Process	GO:0016114	terpenoid biosynthetic process	0.987730268860644	1	3	264
GO:1901135 carbohydrate derivative metabolic process	32	0.987962507578367	2.349	0.021	Biological Process	GO:1901135	carbohydrate derivative metabolic process	0.987962507578367	1	32	1499
GO:0006661 phosphatidylinositol biosynthetic process	1	0.988043197657071	0.073	0.007	Biological Process	GO:0006661	phosphatidylinositol biosynthetic process	0.988043197657071	1	1	143
GO:0009579 thylakoid	21	0.988506538475779	2.065	0.02	Cellular Component	GO:0009579	thylakoid	0.988506538475779	1	21	1064
GO:0005829 cytosol	27	0.988783356905227	2.655	0.021	Cellular Component	GO:0005829	cytosol	0.988783356905227	1	27	1306
GO:0071705 nitrogen compound transport	35	0.989282610601271	2.57	0.022	Biological Process	GO:0071705	nitrogen compound transport	0.989282610601271	1	35	1626
GO:0022411 cellular component disassembly	1	0.989437855373996	0.073	0.007	Biological Process	GO:0022411	cellular component disassembly	0.989437855373996	1	1	147
GO:0008643 carbohydrate transport	2	0.990036764295084	0.147	0.009	Biological Process	GO:0008643	carbohydrate transport	0.990036764295084	1	2	215
GO:0032268 regulation of cellular protein metabolic process	10	0.990151118684796	0.734	0.016	Biological Process	GO:0032268	regulation of cellular protein metabolic process	0.990151118684796	1	10	611
GO:0098869 cellular oxidant detoxification	1	0.990376087060443	0.073	0.007	Biological Process	GO:0098869	cellular oxidant detoxification	0.990376087060443	1	1	150
GO:0042445 hormone metabolic process	1	0.990669943703578	0.073	0.007	Biological Process	GO:0042445	hormone metabolic process	0.990669943703578	1	1	151
GO:0016866 intramolecular transferase activity	1	0.990691650370262	0.055	0.006	Molecular Function	GO:0016866	intramolecular transferase activity	0.990691650370262	1	1	166
GO:0003955 NAD(P)H dehydrogenase (quinone) activity	2	0.990696392012271	0.111	0.008	Molecular Function	GO:0003955	NAD(P)H dehydrogenase (quinone) activity	0.990696392012271	1	2	239
GO:0022414 reproductive process	30	0.990749576379388	2.203	0.021	Biological Process	GO:0022414	reproductive process	0.990749576379388	1	30	1443
GO:0016788 hydrolase activity, acting on ester bonds	53	0.990944573795647	2.941	0.021	Molecular Function	GO:0016788	hydrolase activity, acting on ester bonds	0.990944573795647	1	53	2561
GO:0000003 reproduction	30	0.991183865585404	2.203	0.021	Biological Process	GO:0000003	reproduction	0.991183865585404	1	30	1447
GO:0031984 organelle subcompartment	22	0.99151141246678	2.163	0.02	Cellular Component	GO:0031984	organelle subcompartment	0.99151141246678	1	22	1127
GO:0000280 nuclear division	2	0.991528501793154	0.147	0.009	Biological Process	GO:0000280	nuclear division	0.991528501793154	1	2	221
GO:0016746 acyltransferase activity	28	0.991586408844106	1.554	0.019	Molecular Function	GO:0016746	acyltransferase activity	0.991586408844106	1	28	1507
GO:0008242 omega peptidase activity	1	0.99168495211397	0.055	0.006	Molecular Function	GO:0008242	omega peptidase activity	0.99168495211397	1	1	170
GO:0006643 membrane lipid metabolic process	2	0.991975411151153	0.147	0.009	Biological Process	GO:0006643	membrane lipid metabolic process	0.991975411151153	1	2	223
GO:0016747 acyltransferase activity, transferring groups other than amino-acyl groups	25	0.992077508580006	1.387	0.018	Molecular Function	GO:0016747	acyltransferase activity, transferring groups other than amino-acyl groups	0.992077508580006	1	25	1380
GO:0008233 peptidase activity	48	0.992116146624941	2.664	0.02	Molecular Function	GO:0008233	peptidase activity	0.992116146624941	1	48	2368
GO:0101005 deubiquitinase activity	1	0.992141138460333	0.055	0.006	Molecular Function	GO:0101005	deubiquitinase activity	0.992141138460333	1	1	172
GO:0016579 protein deubiquitination	1	0.992254074855359	0.073	0.006	Biological Process	GO:0016579	protein deubiquitination	0.992254074855359	1	1	157
GO:0016591 RNA polymerase II, holoenzyme	1	0.99227802396288	0.098	0.006	Cellular Component	GO:0016591	RNA polymerase II, holoenzyme	0.99227802396288	1	1	157
GO:0003724 RNA helicase activity	1	0.992359763699534	0.055	0.006	Molecular Function	GO:0003724	RNA helicase activity	0.992359763699534	1	1	173
GO:0008186 ATP-dependent activity, acting on RNA	1	0.992359763699534	0.055	0.006	Molecular Function	GO:0008186	ATP-dependent activity, acting on RNA	0.992359763699534	1	1	173
GO:0008237 metallopeptidase activity	4	0.99256150143813	0.222	0.011	Molecular Function	GO:0008237	metallopeptidase activity	0.99256150143813	1	4	372
GO:0008380 RNA splicing	7	0.99283898478172	0.514	0.014	Biological Process	GO:0008380	RNA splicing	0.99283898478172	1	7	490
GO:0097237 cellular response to toxic substance	1	0.992942292253271	0.073	0.006	Biological Process	GO:0097237	cellular response to toxic substance	0.992942292253271	1	1	160
GO:1990748 cellular detoxification	1	0.992942292253271	0.073	0.006	Biological Process	GO:1990748	cellular detoxification	0.992942292253271	1	1	160
GO:0008654 phospholipid biosynthetic process	3	0.993032575395987	0.22	0.01	Biological Process	GO:0008654	phospholipid biosynthetic process	0.993032575395987	1	3	287
GO:0008037 cell recognition	6	0.993035034808527	0.441	0.014	Biological Process	GO:0008037	cell recognition	0.993035034808527	1	6	443
GO:0048544 recognition of pollen	6	0.993035034808527	0.441	0.014	Biological Process	GO:0048544	recognition of pollen	0.993035034808527	1	6	443
GO:0004527 exonuclease activity	2	0.993079390696848	0.111	0.008	Molecular Function	GO:0004527	exonuclease activity	0.993079390696848	1	2	251
GO:0051246 regulation of protein metabolic process	10	0.993203209209177	0.734	0.016	Biological Process	GO:0051246	regulation of protein metabolic process	0.993203209209177	1	10	632
GO:0033692 cellular polysaccharide biosynthetic process	3	0.993370559297126	0.22	0.01	Biological Process	GO:0033692	cellular polysaccharide biosynthetic process	0.993370559297126	1	3	289
GO:0140101 catalytic activity, acting on a tRNA	4	0.993443642484656	0.222	0.011	Molecular Function	GO:0140101	catalytic activity, acting on a tRNA	0.993443642484656	1	4	378
GO:0019783 ubiquitin-like protein-specific protease activity	1	0.993549614315218	0.055	0.006	Molecular Function	GO:0019783	ubiquitin-like protein-specific protease activity	0.993549614315218	1	1	179
GO:0050660 flavin adenine dinucleotide binding	8	0.993637268124471	0.444	0.013	Molecular Function	GO:0050660	flavin adenine dinucleotide binding	0.993637268124471	1	8	597
GO:0008234 cysteine-type peptidase activity	10	0.993698591360848	0.555	0.014	Molecular Function	GO:0008234	cysteine-type peptidase activity	0.993698591360848	1	10	699
GO:0006310 DNA recombination	2	0.993717042687952	0.147	0.009	Biological Process	GO:0006310	DNA recombination	0.993717042687952	1	2	232
GO:0016811 hydrolase activity, acting on carbon-nitrogen (but not peptide) bonds, in linear amides	1	0.993729076635216	0.055	0.006	Molecular Function	GO:0016811	hydrolase activity, acting on carbon-nitrogen (but not peptide) bonds, in linear amides	0.993729076635216	1	1	180
GO:0006839 mitochondrial transport	1	0.993765812276969	0.073	0.006	Biological Process	GO:0006839	mitochondrial transport	0.993765812276969	1	1	164
GO:0016655 oxidoreductase activity, acting on NAD(P)H, quinone or similar compound as acceptor	2	0.993885482933692	0.111	0.008	Molecular Function	GO:0016655	oxidoreductase activity, acting on NAD(P)H, quinone or similar compound as acceptor	0.993885482933692	1	2	256
GO:0003899 DNA-directed 5'-3' RNA polymerase activity	1	0.993903548656945	0.055	0.006	Molecular Function	GO:0003899	DNA-directed 5'-3' RNA polymerase activity	0.993903548656945	1	1	181
GO:0015318 inorganic molecular entity transmembrane transporter activity	27	0.993971500979548	1.498	0.018	Molecular Function	GO:0015318	inorganic molecular entity transmembrane transporter activity	0.993971500979548	1	27	1492
GO:0009250 glucan biosynthetic process	2	0.994050536081705	0.147	0.009	Biological Process	GO:0009250	glucan biosynthetic process	0.994050536081705	1	2	234
GO:0019899 enzyme binding	4	0.994345916986112	0.222	0.01	Molecular Function	GO:0019899	enzyme binding	0.994345916986112	1	4	385
GO:0009875 pollen-pistil interaction	6	0.994464355999923	0.441	0.013	Biological Process	GO:0009875	pollen-pistil interaction	0.994464355999923	1	6	454
GO:0051726 regulation of cell cycle	2	0.994666304228253	0.147	0.008	Biological Process	GO:0051726	regulation of cell cycle	0.994666304228253	1	2	238
GO:0008299 isoprenoid biosynthetic process	4	0.994799412362931	0.294	0.011	Biological Process	GO:0008299	isoprenoid biosynthetic process	0.994799412362931	1	4	354
GO:0052689 carboxylic ester hydrolase activity	3	0.994892757093318	0.166	0.009	Molecular Function	GO:0052689	carboxylic ester hydrolase activity	0.994892757093318	1	3	329
GO:0070646 protein modification by small protein removal	1	0.995703656168126	0.073	0.006	Biological Process	GO:0070646	protein modification by small protein removal	0.995703656168126	1	1	176
GO:0061695 transferase complex, transferring phosphorus-containing groups	3	0.996114617523685	0.295	0.01	Cellular Component	GO:0061695	transferase complex, transferring phosphorus-containing groups	0.996114617523685	1	3	310
GO:0031410 cytoplasmic vesicle	5	0.996673496274577	0.492	0.012	Cellular Component	GO:0031410	cytoplasmic vesicle	0.996673496274577	1	5	426
GO:0030246 carbohydrate binding	19	0.996761448582985	1.054	0.016	Molecular Function	GO:0030246	carbohydrate binding	0.996761448582985	1	19	1177
GO:0090575 RNA polymerase II transcription regulator complex	1	0.996764407827993	0.098	0.005	Cellular Component	GO:0090575	RNA polymerase II transcription regulator complex	0.996764407827993	1	1	185
GO:0097708 intracellular vesicle	5	0.996891538847447	0.492	0.012	Cellular Component	GO:0097708	intracellular vesicle	0.996891538847447	1	5	429
GO:0043414 macromolecule methylation	4	0.997120639295375	0.294	0.011	Biological Process	GO:0043414	macromolecule methylation	0.997120639295375	1	4	379
GO:0004519 endonuclease activity	3	0.997124927757803	0.166	0.008	Molecular Function	GO:0004519	endonuclease activity	0.997124927757803	1	3	354
GO:0000271 polysaccharide biosynthetic process	3	0.99732519636912	0.22	0.009	Biological Process	GO:0000271	polysaccharide biosynthetic process	0.99732519636912	1	3	325
GO:0031982 vesicle	5	0.997407776939191	0.492	0.011	Cellular Component	GO:0031982	vesicle	0.997407776939191	1	5	437
GO:0005667 transcription regulator complex	2	0.997409689323949	0.197	0.008	Cellular Component	GO:0005667	transcription regulator complex	0.997409689323949	1	2	264
GO:0006352 DNA-templated transcription, initiation	2	0.997532718442105	0.147	0.008	Biological Process	GO:0006352	DNA-templated transcription, initiation	0.997532718442105	1	2	266
GO:0046488 phosphatidylinositol metabolic process	2	0.997532718442105	0.147	0.008	Biological Process	GO:0046488	phosphatidylinositol metabolic process	0.997532718442105	1	2	266
GO:0048285 organelle fission	2	0.997532718442105	0.147	0.008	Biological Process	GO:0048285	organelle fission	0.997532718442105	1	2	266
GO:0034062 5'-3' RNA polymerase activity	1	0.997597989889433	0.055	0.005	Molecular Function	GO:0034062	5'-3' RNA polymerase activity	0.997597989889433	1	1	214
GO:0097747 RNA polymerase activity	1	0.997597989889433	0.055	0.005	Molecular Function	GO:0097747	RNA polymerase activity	0.997597989889433	1	1	214
GO:0044255 cellular lipid metabolic process	29	0.997700993117933	2.129	0.019	Biological Process	GO:0044255	cellular lipid metabolic process	0.997700993117933	1	29	1512
GO:0004185 serine-type carboxypeptidase activity	1	0.997729859064481	0.055	0.005	Molecular Function	GO:0004185	serine-type carboxypeptidase activity	0.997729859064481	1	1	216
GO:0045017 glycerolipid biosynthetic process	2	0.997852269988381	0.147	0.007	Biological Process	GO:0045017	glycerolipid biosynthetic process	0.997852269988381	1	2	271
GO:0005768 endosome	1	0.997970254990134	0.098	0.005	Cellular Component	GO:0005768	endosome	0.997970254990134	1	1	200
GO:0044265 cellular macromolecule catabolic process	23	0.998006727017525	1.689	0.018	Biological Process	GO:0044265	cellular macromolecule catabolic process	0.998006727017525	1	23	1273
GO:0000287 magnesium ion binding	5	0.998029931781741	0.277	0.01	Molecular Function	GO:0000287	magnesium ion binding	0.998029931781741	1	5	494
GO:0051276 chromosome organization	12	0.998193807899045	0.881	0.015	Biological Process	GO:0051276	chromosome organization	0.998193807899045	1	12	797
GO:0004180 carboxypeptidase activity	1	0.998288285865503	0.055	0.004	Molecular Function	GO:0004180	carboxypeptidase activity	0.998288285865503	1	1	226
GO:0070008 serine-type exopeptidase activity	1	0.998427317642578	0.055	0.004	Molecular Function	GO:0070008	serine-type exopeptidase activity	0.998427317642578	1	1	229
GO:0008757 S-adenosylmethionine-dependent methyltransferase activity	3	0.998468633540437	0.166	0.008	Molecular Function	GO:0008757	S-adenosylmethionine-dependent methyltransferase activity	0.998468633540437	1	3	381
GO:0008094 ATP-dependent activity, acting on DNA	2	0.998610911672286	0.111	0.006	Molecular Function	GO:0008094	ATP-dependent activity, acting on DNA	0.998610911672286	1	2	315
GO:0031981 nuclear lumen	11	0.998655289252592	1.082	0.014	Cellular Component	GO:0031981	nuclear lumen	0.998655289252592	1	11	765
GO:0004812 aminoacyl-tRNA ligase activity	1	0.998672436261475	0.055	0.004	Molecular Function	GO:0004812	aminoacyl-tRNA ligase activity	0.998672436261475	1	1	235
GO:0016875 ligase activity, forming carbon-oxygen bonds	1	0.998672436261475	0.055	0.004	Molecular Function	GO:0016875	ligase activity, forming carbon-oxygen bonds	0.998672436261475	1	1	235
GO:0022618 ribonucleoprotein complex assembly	1	0.998758795169834	0.073	0.005	Biological Process	GO:0022618	ribonucleoprotein complex assembly	0.998758795169834	1	1	216
GO:0015031 protein transport	19	0.998903796655001	1.395	0.017	Biological Process	GO:0015031	protein transport	0.998903796655001	1	19	1140
GO:0043531 ADP binding	40	0.998909911411737	2.22	0.018	Molecular Function	GO:0043531	ADP binding	0.998909911411737	1	40	2216
GO:0030247 polysaccharide binding	5	0.998973742474472	0.277	0.01	Molecular Function	GO:0030247	polysaccharide binding	0.998973742474472	1	5	525
GO:0045184 establishment of protein localization	19	0.999112524205089	1.395	0.016	Biological Process	GO:0045184	establishment of protein localization	0.999112524205089	1	19	1153
GO:0003924 GTPase activity	5	0.999170660296694	0.277	0.009	Molecular Function	GO:0003924	GTPase activity	0.999170660296694	1	5	535
GO:0006260 DNA replication	2	0.999258177580126	0.147	0.006	Biological Process	GO:0006260	DNA replication	0.999258177580126	1	2	309
GO:0031047 gene silencing by RNA	1	0.999268000348098	0.073	0.004	Biological Process	GO:0031047	gene silencing by RNA	0.999268000348098	1	1	233
GO:0006418 tRNA aminoacylation for protein translation	1	0.999290392898597	0.073	0.004	Biological Process	GO:0006418	tRNA aminoacylation for protein translation	0.999290392898597	1	1	234
GO:0010608 posttranscriptional regulation of gene expression	2	0.999298822951298	0.147	0.006	Biological Process	GO:0010608	posttranscriptional regulation of gene expression	0.999298822951298	1	2	311
GO:0006650 glycerophospholipid metabolic process	3	0.999304536260283	0.22	0.008	Biological Process	GO:0006650	glycerophospholipid metabolic process	0.999304536260283	1	3	377
GO:0012505 endomembrane system	35	0.999330820208642	3.441	0.019	Cellular Component	GO:0012505	endomembrane system	0.999330820208642	1	35	1844
GO:0071826 ribonucleoprotein complex subunit organization	1	0.999353546424814	0.073	0.004	Biological Process	GO:0071826	ribonucleoprotein complex subunit organization	0.999353546424814	1	1	237
GO:0006417 regulation of translation	1	0.999373323818048	0.073	0.004	Biological Process	GO:0006417	regulation of translation	0.999373323818048	1	1	238
GO:0034248 regulation of cellular amide metabolic process	1	0.999373323818048	0.073	0.004	Biological Process	GO:0034248	regulation of cellular amide metabolic process	0.999373323818048	1	1	238
GO:0071702 organic substance transport	42	0.999395301590545	3.084	0.02	Biological Process	GO:0071702	organic substance transport	0.999395301590545	1	42	2142
GO:0098588 bounding membrane of organelle	15	0.999398012916388	1.475	0.015	Cellular Component	GO:0098588	bounding membrane of organelle	0.999398012916388	1	15	994
GO:0007010 cytoskeleton organization	4	0.99947987316168	0.294	0.009	Biological Process	GO:0007010	cytoskeleton organization	0.99947987316168	1	4	449
GO:0043038 amino acid activation	1	0.999495831744037	0.073	0.004	Biological Process	GO:0043038	amino acid activation	0.999495831744037	1	1	245
GO:0043039 tRNA aminoacylation	1	0.999495831744037	0.073	0.004	Biological Process	GO:0043039	tRNA aminoacylation	0.999495831744037	1	1	245
GO:0006644 phospholipid metabolic process	5	0.999497944063163	0.367	0.01	Biological Process	GO:0006644	phospholipid metabolic process	0.999497944063163	1	5	508
GO:0008104 protein localization	19	0.999519164018066	1.395	0.016	Biological Process	GO:0008104	protein localization	0.999519164018066	1	19	1190
GO:0005794 Golgi apparatus	11	0.999527767764259	1.082	0.013	Cellular Component	GO:0005794	Golgi apparatus	0.999527767764259	1	11	819
GO:0072521 purine-containing compound metabolic process	7	0.999628079279292	0.514	0.011	Biological Process	GO:0072521	purine-containing compound metabolic process	0.999628079279292	1	7	630
GO:0022402 cell cycle process	4	0.999642839010965	0.294	0.009	Biological Process	GO:0022402	cell cycle process	0.999642839010965	1	4	464
GO:0016458 gene silencing	1	0.999652787163634	0.073	0.004	Biological Process	GO:0016458	gene silencing	0.999652787163634	1	1	257
GO:1901137 carbohydrate derivative biosynthetic process	14	0.999660283155911	1.028	0.014	Biological Process	GO:1901137	carbohydrate derivative biosynthetic process	0.999660283155911	1	14	981
GO:0008092 cytoskeletal protein binding	6	0.999669640666635	0.333	0.009	Molecular Function	GO:0008092	cytoskeletal protein binding	0.999669640666635	1	6	639
GO:0022900 electron transport chain	4	0.999722448345867	0.294	0.008	Biological Process	GO:0022900	electron transport chain	0.999722448345867	1	4	474
GO:0005654 nucleoplasm	2	0.999727977942081	0.197	0.006	Cellular Component	GO:0005654	nucleoplasm	0.999727977942081	1	2	344
GO:0022804 active transmembrane transporter activity	21	0.999769920617676	1.165	0.014	Molecular Function	GO:0022804	active transmembrane transporter activity	0.999769920617676	1	21	1455
GO:0030145 manganese ion binding	1	0.999805642674935	0.055	0.003	Molecular Function	GO:0030145	manganese ion binding	0.999805642674935	1	1	303
GO:0006974 cellular response to DNA damage stimulus	7	0.999822798284758	0.514	0.011	Biological Process	GO:0006974	cellular response to DNA damage stimulus	0.999822798284758	1	7	663
GO:0033036 macromolecule localization	26	0.999834761516722	1.909	0.017	Biological Process	GO:0033036	macromolecule localization	0.999834761516722	1	26	1564
GO:0009150 purine ribonucleotide metabolic process	5	0.999850006025891	0.367	0.009	Biological Process	GO:0009150	purine ribonucleotide metabolic process	0.999850006025891	1	5	558
GO:0032259 methylation	4	0.999860347094492	0.294	0.008	Biological Process	GO:0032259	methylation	0.999860347094492	1	4	501
GO:0008238 exopeptidase activity	1	0.999861563111168	0.055	0.003	Molecular Function	GO:0008238	exopeptidase activity	0.999861563111168	1	1	315
GO:0140097 catalytic activity, acting on DNA	4	0.999873550715424	0.222	0.007	Molecular Function	GO:0140097	catalytic activity, acting on DNA	0.999873550715424	1	4	555
GO:0006281 DNA repair	6	0.999881110222519	0.441	0.01	Biological Process	GO:0006281	DNA repair	0.999881110222519	1	6	625
GO:0030163 protein catabolic process	13	0.999883569242764	0.954	0.013	Biological Process	GO:0030163	protein catabolic process	0.999883569242764	1	13	989
GO:0031974 membrane-enclosed lumen	14	0.999896495255778	1.377	0.013	Cellular Component	GO:0031974	membrane-enclosed lumen	0.999896495255778	1	14	1041
GO:0043233 organelle lumen	14	0.999896495255778	1.377	0.013	Cellular Component	GO:0043233	organelle lumen	0.999896495255778	1	14	1041
GO:0070013 intracellular organelle lumen	14	0.999896495255778	1.377	0.013	Cellular Component	GO:0070013	intracellular organelle lumen	0.999896495255778	1	14	1041
GO:0010629 negative regulation of gene expression	4	0.999904984447904	0.294	0.008	Biological Process	GO:0010629	negative regulation of gene expression	0.999904984447904	1	4	516
GO:0046486 glycerolipid metabolic process	3	0.999908474928385	0.22	0.007	Biological Process	GO:0046486	glycerolipid metabolic process	0.999908474928385	1	3	453
GO:0006163 purine nucleotide metabolic process	5	0.999910519999403	0.367	0.009	Biological Process	GO:0006163	purine nucleotide metabolic process	0.999910519999403	1	5	579
GO:0006605 protein targeting	1	0.999914340326965	0.073	0.003	Biological Process	GO:0006605	protein targeting	0.999914340326965	1	1	302
GO:0000398 mRNA splicing, via spliceosome	2	0.999914817422109	0.147	0.005	Biological Process	GO:0000398	mRNA splicing, via spliceosome	0.999914817422109	1	2	385
GO:0007049 cell cycle	6	0.999926137552606	0.441	0.009	Biological Process	GO:0007049	cell cycle	0.999926137552606	1	6	645
GO:0016043 cellular component organization	74	0.999932786753293	5.433	0.021	Biological Process	GO:0016043	cellular component organization	0.999932786753293	1	74	3592
GO:0009259 ribonucleotide metabolic process	5	0.999935172121118	0.367	0.008	Biological Process	GO:0009259	ribonucleotide metabolic process	0.999935172121118	1	5	592
GO:0019693 ribose phosphate metabolic process	5	0.999939834281728	0.367	0.008	Biological Process	GO:0019693	ribose phosphate metabolic process	0.999939834281728	1	5	595
GO:0046034 ATP metabolic process	4	0.999946217582852	0.294	0.007	Biological Process	GO:0046034	ATP metabolic process	0.999946217582852	1	4	538
GO:0006511 ubiquitin-dependent protein catabolic process	8	0.999955346327317	0.587	0.01	Biological Process	GO:0006511	ubiquitin-dependent protein catabolic process	0.999955346327317	1	8	778
GO:0044257 cellular protein catabolic process	11	0.999957974700524	0.808	0.012	Biological Process	GO:0044257	cellular protein catabolic process	0.999957974700524	1	11	939
GO:0005525 GTP binding	5	0.999957991380634	0.277	0.007	Molecular Function	GO:0005525	GTP binding	0.999957991380634	1	5	670
GO:0032561 guanyl ribonucleotide binding	5	0.999957991380634	0.277	0.007	Molecular Function	GO:0032561	guanyl ribonucleotide binding	0.999957991380634	1	5	670
GO:0004518 nuclease activity	5	0.999962508783753	0.277	0.007	Molecular Function	GO:0004518	nuclease activity	0.999962508783753	1	5	675
GO:0019001 guanyl nucleotide binding	5	0.999962508783753	0.277	0.007	Molecular Function	GO:0019001	guanyl nucleotide binding	0.999962508783753	1	5	675
GO:0006259 DNA metabolic process	10	0.99996445372559	0.734	0.011	Biological Process	GO:0006259	DNA metabolic process	0.99996445372559	1	10	895
GO:0055086 nucleobase-containing small molecule metabolic process	10	0.999967412307048	0.734	0.011	Biological Process	GO:0055086	nucleobase-containing small molecule metabolic process	0.999967412307048	1	10	899
[truncated: 77 more rows]
