# Supplementary material for: The TaBBM-TaWRKY41-TacAGPS1a module affects starch synthesis and grain quality by regulating embryo and endosperm development in wheat
Source: Research Square preprint supplement (doi:10.21203/rs.3.rs-8619315/v1), 2026-01-27
Supplement: Supplementary file 4 [file 2909aed6b18c0f9a1c84c2b7.xlsx]

## Sheet: Sheet1
Supplementary Data 1. List of TF in the spatial transcriptomic and single-cell transcriptomic.
id	Symbol	id	Embryo	ESR	Central	TCSE	Cavity fluid	Sub	Aleurone	Testa	Inner	Outer	RNA.Dividing.cell	RNA.Embryo	RNA.ESR	RNA.Scutellum	RNA.TCSE	RNA.Pericarp	RNA.SC	RNA.CF	RNA.Unknown
TraesCS5B02G028500	NFYA2	TraesCS5B02G028500	10.7201	0.216108	0.0195925	0.168884	0.153706	0.0385802	0.0788644	0.169112	0.0571081	0.0722946	86	68	39	2	27	25	29	22	10
TraesCS4A02G434900	GRF5	TraesCS4A02G434900	10.1993	0.636076	0.662398	0.683541	0.18858	0.557295	0.422902	0.261363	0.188161	0.0844879	240	14	177	25	172	127	94	87	81
TraesCS1A02G396400	ARF15	TraesCS1A02G396400	7.90761	0.630869	0.271313	0.357099	0.0674373	0.793513	0.747298	0.373582	0.113922	0.220028	288	38	184	13	183	154	159	85	80
TraesCS3A02G249100	LFL1	TraesCS3A02G249100	7.26902	0.262758	0.238221	0.203169	0.415366	0.536402	0.559234	0.240283	0.097272	0.131755	165	37	73	5	67	42	53	31	33
TraesCS3A02G395500	BBM2	TraesCS3A02G395500	6.75272	0.0433276	0	0	0.1	0.0385802	0	0.0535498	0.00444998	0.0132066	39	20	1	0	8	2	4	2	3
TraesCS3D02G249100	LFL1	TraesCS3D02G249100	6.22736	0.365819	0.256776	0.337942	0.153706	0.870674	0.545595	0.446467	0.0910094	0.0656863	238	32	95	9	98	68	49	55	55
TraesCS3A02G247200	WOX7	TraesCS3A02G247200	5.91033	0.282485	0.147806	0.219905	0.1	0.10318	0.985049	0.586167	0.0841218	0.243659	25	9	11	0	19	10	15	4	8
TraesCS1D02G404400	ARF15	TraesCS1D02G404400	5.61594	0.260822	0.465649	0.306053	0.274782	0.343107	0.494132	0.766678	0.216417	0.226988	166	32	125	8	101	107	82	58	48
TraesCSU02G031300	NERD	TraesCSU02G031300	4.89583	0.111111	0.337433	0.07987	0.404557	0.157137	0.923342	0.314446	0.179882	0.142154	82	6	59	10	74	78	57	45	25
TraesCS6A02G087400	-	TraesCS6A02G087400	4.78261	0.451974	0.358268	0.757748	0.593814	0.647132	0.900033	0.874459	0.564274	0.417789	434	17	278	38	324	399	302	228	152
TraesCS3D02G268600	DPB	TraesCS3D02G268600	4.78261	0.333313	0.332378	0.376631	0.477704	0.275693	0.572423	0.153759	0.137902	0.077507	36	5	44	2	37	21	13	16	19
TraesCS3B02G427300	BBM2	TraesCS3B02G427300	4.46105	0.0216638	0	0	0.1	0	0	0	0.00982864	0	28	24	5	1	12	0	3	4	2
TraesCS5D02G093100	RS2	TraesCS5D02G093100	4.25725	0.495251	0.428814	0.213009	0.134875	0.410017	0.415268	0.908076	0.219409	0.351799	88	15	51	6	61	48	79	19	22
TraesCS2B02G413500	SCL8	TraesCS2B02G413500	4.05797	0.318313	0.227286	0.448041	0.65323	0.200843	0.745398	0.465238	0.179942	0.579143	313	15	263	22	302	226	221	200	141
TraesCS1A02G268800	MYB308	TraesCS1A02G268800	4.05797	0.0555556	0.0818996	0.375535	0.208022	0.211486	0.383774	0.402835	0.267491	0.451509	199	5	164	16	187	141	122	118	80
TraesCS3B02G103200	GTE9	TraesCS3B02G103200	4.05797	0.0772193	0.244386	0.078089	0.0674373	0.0437063	0.059952	0.123521	0.0679256	0.0260666	66	3	46	6	49	42	34	13	17
TraesCS3D02G350700	ZAT7	TraesCS3D02G350700	4.05797	0.212766	0.0537922	0.137021	0.364039	0.0385802	0.059952	0.223594	0.0555107	0.0980147	41	2	36	2	32	42	22	46	22
TraesCS6A02G287300	NFYB6	TraesCS6A02G287300	3.85417	0.0866551	0.0195925	0.020938	0	0	0	0.0354598	0.00982864	0.0128601	50	66	5	0	12	10	5	5	4
TraesCS7B02G115400	NAC008	TraesCS7B02G115400	3.85417	0.66469	0.624606	0.498296	0.396602	0.611252	0.428176	0.228502	0.120235	0.289188	110	8	66	6	91	50	31	37	32
TraesCS5B02G125100	E2FA	TraesCS5B02G125100	3.85417	0.193038	0.638928	0.909109	0.269749	0.869258	0.995325	0.401245	0.369453	0.241218	150	6	72	9	122	110	62	52	29
TraesCS5D02G148000	SCR2	TraesCS5D02G148000	3.85417	0.155825	0.232341	0.209127	0.700548	0.309148	0.0394322	0.185007	0.201083	0.0517868	66	6	32	6	39	57	36	18	14
TraesCS5A02G482700	-	TraesCS5A02G482700	3.85417	0.317763	0.168784	0.296533	0.505844	0.513197	0.390655	0.268351	0.199486	0.22976	75	5	38	5	45	38	43	27	22
TraesCS7D02G292500	AIL1	TraesCS7D02G292500	3.85417	0.314991	0.49507	0.713178	0.759897	0.925916	0.501766	0.689717	0.460602	0.449441	156	3	108	8	187	154	81	50	52
TraesCS4D02G228800	ROC4	TraesCS4D02G228800	3.85417	0.37664	0.649254	0.65973	0.336509	0	0.25375	0.058771	0.0187286	0.0514403	69	3	99	1	139	43	34	24	24
TraesCS5D02G383000	NFYA10	TraesCS5D02G383000	3.73641	0.148325	0.0341997	0.020938	0.326853	0.0437063	0.0394322	0.0862723	0.0178601	0	75	48	27	4	21	10	13	9	21
TraesCS3D02G284200	MADS32	TraesCS3D02G284200	3.53261	0.24248	0.388805	0.286895	0.432087	0.374251	0.159336	0.54141	0.831447	0.139739	154	15	89	13	103	241	76	55	32
TraesCS5A02G121800	PCF3	TraesCS5A02G121800	3.33333	0.106383	0.41442	0.29498	0.0674373	0.35837	0.831592	0.42828	0.244908	0.354917	338	16	182	22	227	211	131	86	98
TraesCS5D02G164600	MYB44	TraesCS5D02G164600	3.33333	0.428874	0.3384	0.475875	0.140584	0.46718	0.198768	0.445282	0.30381	0.57781	465	14	313	42	341	289	235	153	188
TraesCS4D02G058000	KNOX3	TraesCS4D02G058000	3.33333	0.183602	0	0	0.0811688	0	0	0.0327225	0.361669	0.0521333	35	10	11	8	15	14	5	4	5
TraesCS4D02G171700	RF2b	TraesCS4D02G171700	3.33333	0.26505	0.277336	0.555768	0.0405844	0.631753	0.916461	0.295989	0.119354	0.183872	198	8	109	10	149	97	85	61	72
TraesCS2B02G144400	TCX5	TraesCS2B02G144400	3.33333	0.154439	0.152792	0.495875	0.788037	0.443473	0.875691	0.49336	0.381399	0.286769	122	8	65	8	97	105	69	39	41
TraesCS4B02G239700	HSFA9	TraesCS4B02G239700	3.33333	0.933062	0.964249	0.711478	0.175459	0.780561	0.808712	0.431208	0.298995	0.347295	316	7	232	25	261	206	146	113	107
TraesCS1A02G096800	MYB98	TraesCS1A02G096800	3.33333	1.10216	0.346702	0.501038	0.121753	0.590862	0.538714	0.112825	0.0422685	0.0330214	107	6	93	10	101	64	50	25	44
TraesCS3B02G270500	WRKY71	TraesCS3B02G270500	3.33333	0.183602	0.183392	0.214963	0.153706	0.0385802	0.316188	0.392062	0.174878	0.136595	69	6	53	7	78	59	46	24	29
TraesCS5D02G183100	PHL1	TraesCS5D02G183100	3.33333	0.413854	0.506972	0.512556	0.391502	0.352854	0.293756	0.541977	0.456821	0.356985	155	6	92	14	117	141	98	65	53
TraesCS6A02G325100	Supt5h	TraesCS6A02G325100	3.33333	0.382754	0.0341997	0.137021	0.229775	0.301713	0.445907	0.223708	0.139525	0.123388	140	6	152	5	99	78	69	54	40
TraesCS5A02G488700	At3g47120	TraesCS5A02G488700	3.33333	0.0494416	0.209006	0.07987	0.351528	0.190592	0.059952	0.0371885	0.0529783	0.0649933	126	6	51	3	86	69	61	36	39
TraesCS3A02G341700	WOX8	TraesCS3A02G341700	3.33333	0.523029	0.110077	0.34568	0.0674373	0.549467	0.189975	0.322909	0.205612	0.225949	130	6	113	8	112	112	63	36	36
TraesCS6A02G282000	MKRN	TraesCS6A02G282000	3.33333	0.471702	0.283571	0.232486	0.444598	0	0.415572	0.667776	0.418296	0.38482	120	6	96	6	95	158	96	70	51
TraesCS3A02G189600	CDF3	TraesCS3A02G189600	3.33333	1.69825	0.70622	0.750237	0.436576	0.958981	0.594843	0.764018	0.675384	0.329507	305	6	267	24	255	382	178	138	111
TraesCS1D02G397500	brf1	TraesCS1D02G397500	3.33333	0.209494	0.589226	0.345452	0.363972	0.270567	0.254324	0.224289	0.184586	0.145644	63	5	53	5	61	37	37	29	25
TraesCS3A02G375500	DIVARICATA	TraesCS3A02G375500	3.33333	0	0.0512996	0.233947	0.121753	0.0385802	0.239808	0.512924	0.357945	0.551288	135	5	116	19	94	113	70	54	55
TraesCS6D02G268100	NFYB1	TraesCS6D02G268100	3.33333	0.0277778	0.158744	0.216343	0.0405844	0.499234	0.328792	0.0354598	0.0460434	0.106355	145	5	78	3	105	43	49	27	40
TraesCS2D02G125000	TCX5	TraesCS2D02G125000	3.33333	0.757459	0.644056	0.427423	0.28287	0.518324	0.577393	0.454519	0.280267	0.141461	109	5	72	6	85	83	62	57	44
TraesCS1D02G072600	GT-3A	TraesCS1D02G072600	3.33333	0.416646	0.0587774	0.217852	0.161727	0.14176	0.13442	0.0513168	0.0774596	0.0556237	66	4	68	4	78	39	31	26	19
TraesCS2A02G116100	ARR1	TraesCS2A02G116100	3.33333	0.177488	0.0452072	0.231846	0.0674373	0.108306	0.501463	0.342008	0.204991	0.219004	164	4	110	13	123	115	76	57	45
TraesCS3A02G246000	ARF2	TraesCS3A02G246000	3.33333	0.0833333	0.0904145	0.0589319	0.0405844	0.14176	0.415572	0.177943	0.104087	0.100812	29	4	26	3	31	20	27	15	15
TraesCS6B02G276100	ZAT9	TraesCS6B02G276100	3.33333	0.160553	0.749902	0.689969	0.0805585	0.291461	0.434629	0.0638555	0.131354	0.0646469	123	4	113	13	111	68	80	47	37
TraesCS3A02G360300	SCL9	TraesCS3A02G360300	3.33333	0.0555556	0.105022	0.07987	0.189191	0.120867	0.159336	0.241545	0.127852	0.576646	75	4	46	4	64	38	41	27	26
TraesCS5A02G395100	WRKY57	TraesCS5A02G395100	3.33333	0.282485	0.147806	0.730875	0.428488	0.195717	0.30988	0.579968	0.325398	0.607041	129	3	104	22	154	97	73	61	45
TraesCS5B02G223600	BRF1	TraesCS5B02G223600	3.33333	0.0772193	0.346845	0.448829	0.423388	0.552282	0.498978	0.218373	0.211907	0.253438	54	3	37	5	60	54	42	25	33
TraesCS5A02G305200	At5g02620	TraesCS5A02G305200	3.33333	0.23443	0.0733847	0.178897	0.686817	0.17803	0.569938	0.820409	0.674737	0.499558	83	3	70	14	85	113	84	45	30
TraesCS6B02G138400	SPL3	TraesCS6B02G138400	3.33333	0.361091	0.530306	0.471868	0.947934	0.626629	0.53841	0.657447	0.502342	0.323964	123	2	85	11	100	100	82	48	39
TraesCS4D02G175700	NAM-B1	TraesCS4D02G175700	3.33333	0.240594	0.116099	0.234587	0.670707	0.113431	0.898156	0.616063	0.419583	0.518805	147	2	154	14	130	158	147	136	60
TraesCS2B02G346300	-	TraesCS2B02G346300	3.33333	0	0.070822	0.0951449	0	0.410018	0.152455	0.131809	0.0631144	0.0420707	46	2	34	4	52	42	20	20	20
TraesCS1D02G106600	MYB98	TraesCS1D02G106600	3.33333	0.631369	0.176056	0.272261	0.0942901	0.157137	0.119904	0.133123	0	0.0389267	60	1	103	7	59	29	18	16	15
TraesCS1D02G435700	-	TraesCS1D02G435700	3.33333	0.0988831	0.155284	0.151976	0.0674373	0.49974	0.0968992	0.216857	0.0757893	0.15609	42	1	22	4	39	38	32	21	15
TraesCS2A02G475000	MADS30	TraesCS2A02G475000	3.33333	0.0927691	0.965286	0.408587	0.19429	0.492695	0.410871	0.262876	0.0937826	0.0813439	19	1	8	0	7	17	6	5	11
TraesCS2B02G293300	BHLH62	TraesCS2B02G293300	3.33333	0.20338	0.0256148	0.169205	0.888451	0.0748503	0.293183	0.0708054	0.108543	0.163044	47	1	28	1	28	46	27	28	17
TraesCS6B02G451300	NAC078	TraesCS6B02G451300	3.33333	0.390254	0.356813	0.60454	0.551399	0.74468	0.739663	0.330808	0.260657	0.297198	60	1	46	6	51	50	35	24	20
TraesCS7A02G341100	TCX5	TraesCS7A02G341100	3.33333	0.128047	0.0562848	0.243091	0.174782	0.0771605	0.171063	0.206475	0.0862264	0.0385802	116	1	46	2	58	40	42	31	27
TraesCS6A02G126000	JKD	TraesCS6A02G126000	3.33333	0.177488	0.176056	0.248902	0.633721	0	0.276755	0.371665	0.201216	0.161969	83	1	34	6	51	55	37	28	25
TraesCS1A02G072800	OSH6	TraesCS1A02G072800	3.3288	0.268322	0	0.020938	0.0674373	0.113431	0.059952	0.264215	0.171898	0.130343	50	6	27	8	32	41	31	15	8
TraesCS7D02G483200	AIL5	TraesCS7D02G483200	3.21558	0.0555556	0.0366923	0.0719584	0.1	0	0	0.0731526	0.014399	0.0458815	14	32	4	0	14	4	6	1	3
TraesCS3D02G327600	-	TraesCS3D02G327600	3.21558	0.2811	0.079407	0.0592522	0.126853	0.324916	0.216803	0.360311	0.229647	0.430381	32	18	11	2	17	15	24	9	6
TraesCS5B02G375500	NFYA10	TraesCS5B02G375500	3.01178	0.0433276	0.0170999	0	0	0.0437063	0.059952	0.0256584	0.0134704	0.0163506	58	37	15	5	23	14	15	7	9
TraesCS4A02G291500	GRF9	TraesCS4A02G291500	3.01178	0.209994	0.232341	0.119965	0.0268528	0.200843	0.136331	0.0871667	0.0913514	0.0792493	48	24	17	0	18	11	19	13	8
TraesCS2A02G386200	YAB5	TraesCS2A02G386200	3.01178	0.0433276	0.0195925	0	0.1	0	0.119904	0.132038	0.023299	0.0716016	22	7	7	0	14	8	12	4	14
TraesCS6B02G174400	ARR12	TraesCS6B02G174400	2.69475	0.0711053	0.592969	0.899174	0.329775	0.502946	0.311791	0.171849	0.0751142	0.329569	86	12	57	4	90	28	33	26	30
TraesCS3A02G417300	VP1	TraesCS3A02G417300	2.49094	0.0772193	0.300458	0.804684	0.417001	0.582418	0.34243	0.149874	0.0548831	0.0264131	232	26	156	21	310	117	105	58	61
TraesCS5B02G047200	HOX33	TraesCS5B02G047200	2.49094	0.128047	0.176056	0.13492	0	0.17803	0.150543	0.309399	0.0751744	0.161969	154	7	106	15	105	87	107	54	55
TraesCS2A02G505600	AIL5	TraesCS2A02G505600	2.28714	0.148325	0	0.0589319	0	0.0748503	0.059952	0.0660885	0.0395554	0	58	58	19	4	13	19	10	11	5
TraesCS3A02G334100	-	TraesCS3A02G334100	2.28714	0.149711	0.0512996	0.0759878	0	0	0.0788644	0.375815	0.105636	0.499925	32	19	17	0	24	18	23	14	12
TraesCS3A02G231600	HOX3	TraesCS3A02G231600	2.28714	0.0216638	0	0	0.1	0	0	0	0	0.0128601	10	14	4	0	2	0	3	0	4
TraesCS1A02G309200	PHL1	TraesCS1A02G309200	2.28714	0.0772193	0.326285	0.232166	0.665674	0.169699	0.623582	0.870765	0.563934	0.696673	211	9	150	27	185	263	166	99	93
TraesCS2D02G491200	ARF11	TraesCS2D02G491200	2.28714	0.0216638	0	0	0	0.0437063	0.0968992	0.0424097	0.025597	0.0128601	4	4	3	0	2	2	3	2	1
TraesCS6A02G229500	PLT2	TraesCS6A02G229500	2.28714	0	0	0	0	0	0	0	0.00896018	0.0132066	4	3	1	0	1	0	1	3	0
TraesCS6D02G016300	GT-2	TraesCS6D02G016300	2.17391	0.154439	0.0341997	0.118184	0	0.0822865	0.191887	0.271783	0.0774469	0.131036	114	22	105	9	82	58	60	35	38
TraesCS4D02G020300	GRF9	TraesCS4D02G020300	2.17391	0.0988831	0.0708921	0.179217	0.347929	0.120867	0.354012	0.0685724	0.111116	0	59	17	25	4	22	26	24	13	17
TraesCS3D02G478100	Os03g0619600	TraesCS3D02G478100	2.17391	0	0	0.078089	0.0405844	0	0	0.0283957	0.00988885	0.0128601	3	16	1	0	2	0	1	1	1
TraesCS3B02G365100	-	TraesCS3B02G365100	2.17391	0.0277778	0	0.116083	0.208022	0	0.0949877	0.161077	0.0486616	0.230153	8	12	5	0	7	4	0	3	1
TraesCS5B02G345100	-	TraesCS5B02G345100	2.17391	0.0494416	0.0939441	0.109952	0.296535	0.204049	0.267962	0.16554	0.135756	0.145991	43	2	27	3	25	34	15	19	15
TraesCS2B02G214600	SHR1	TraesCS2B02G214600	2.08333	0	0.039185	0.228284	0	0.149701	0	0.224428	0.33263	0.102881	259	11	153	23	173	451	144	78	58
TraesCS1B02G427400	WOX12	TraesCS1B02G427400	1.97011	0.0555556	0	0.0837521	0.5	0	0	0.0699111	0.0313907	0.0396197	18	62	9	2	4	2	5	3	4
TraesCS3B02G278000	LFL1	TraesCS3B02G278000	1.97011	0.253322	0.0256148	0.020938	0.126853	0.267753	0.370136	0.197369	0.0331276	0.0389267	146	29	47	6	48	39	41	26	26
TraesCS7A02G495800	AIL5	TraesCS7A02G495800	1.97011	0	0	0.020938	0	0.0748503	0	0.0513168	0	0	11	22	3	0	5	1	2	7	2
TraesCS5A02G227100	ZHD9	TraesCS5A02G227100	1.97011	0.149711	0.240856	0.794867	0.524346	0.433222	0.73909	0.272891	0.103779	0.0517868	366	22	213	17	451	165	151	131	105
TraesCS7D02G124700	SPT	TraesCS7D02G124700	1.97011	0.553293	0.579043	0.407821	0.800482	0.440658	0.328792	0.284925	0.363517	0.272534	106	5	73	7	78	70	74	45	41
TraesCS5A02G344100	At5g02620	TraesCS5A02G344100	1.97011	0.750009	0.391155	0.46077	0.337186	0.255192	0.443422	0.89517	0.379615	0.432738	129	5	105	10	103	99	85	64	55
TraesCS6A02G373500	SPT	TraesCS6A02G373500	1.97011	0.22693	0.0256148	0.193852	0.121753	0.265443	0.905003	0.975401	0.112324	0.993794	84	3	53	3	66	52	43	36	24
TraesCS2D02G357600	BBM2	TraesCS2D02G357600	1.97011	0.0494416	0	0	0	0	0	0	0.00451019	0	14	3	3	0	1	0	1	1	0
TraesCS1B02G326700	bdp1	TraesCS1B02G326700	1.97011	0.552193	0.167329	0.685697	0.444531	0.873487	0.570512	0.602146	0.345112	0.330278	114	1	51	8	69	54	39	28	35
TraesCS1B02G203800	YAB3	TraesCS1B02G203800	1.97011	0.199152	0.0562848	0.175015	0.2	0.0748503	0	0.316426	0.119047	0.340609	12	1	6	3	17	6	17	6	4
TraesCS3A02G107200	Os01g0192000	TraesCS3A02G107200	1.7663	0.0216638	0.0598145	0.0379939	0	0	0.179856	0.089904	0.0870346	0.0719481	387	40	272	30	307	357	280	150	151
TraesCS7D02G529200	BHLH93	TraesCS7D02G529200	1.7663	0.153939	0	0.0191571	0.121143	0	0	0.151276	0.0487756	0.0128601	51	15	29	1	35	54	34	29	19
TraesCS4A02G011600	AIL1	TraesCS4A02G011600	1.7663	0.128047	0	0.020938	0	0	0.0394322	0.00929714	0	0.0201613	12	9	3	0	6	2	5	2	0
TraesCS6D02G102300	ARF5	TraesCS6D02G102300	1.7663	0.0216638	0.0341997	0.0610331	0.0405844	0	0	0.113719	0.0196573	0.0201613	18	4	6	0	6	3	10	4	4
TraesCS5A02G239900	-	TraesCS5A02G239900	1.7663	0.432196	0.749077	0.542914	0.450308	0.721476	0.557322	0.406216	0.290577	0.198481	48	2	23	1	30	38	25	22	11
TraesCS1D02G162600	YAB3	TraesCS1D02G162600	1.7663	0.0711053	0.0854292	0.0628141	0.0405844	0.231987	0.0555556	0.489788	0.139706	0.264922	21	1	17	2	12	14	23	10	8
TraesCS3D02G357400	BLH8	TraesCS3D02G357400	1.7663	0.0433276	0	0	0.201635	0	0.119904	0.0381971	0.0402432	0.062232	13	1	15	3	14	15	10	10	3
TraesCS1D02G302100	Os05g0481400	TraesCS1D02G302100	1.5625	0.361091	0.530519	0.381893	0.674916	0.720061	0.651861	0.380028	0.395184	0.227655	121	6	40	8	55	55	47	24	16
TraesCS1A02G314400	bdp1	TraesCS1A02G314400	1.5625	0.439696	0.570884	0.610004	0.423455	0.774018	0.438577	0.30998	0.242883	0.212034	94	5	65	8	59	61	42	32	27
TraesCS1A02G399400	WOX12	TraesCS1A02G399400	1.44928	0.0277778	0	0	0.1	0	0	0.0447569	0.0234194	0.0132066	17	62	6	0	4	4	3	4	0
TraesCS4D02G098100	Os11g0197600	TraesCS4D02G098100	1.44928	0.390804	0.425072	0.354997	0.0537057	0.522943	0.291271	0.366617	0.126663	0.230106	177	17	116	11	127	91	82	53	40
TraesCS2D02G100300	CDF2	TraesCS2D02G100300	1.44928	0.160553	0.194469	0.0951449	0.180559	0.0645995	0.0993842	0.0513168	0.0723154	0.0420707	276	15	202	16	206	164	140	97	91
TraesCS3B02G272200	WOX7	TraesCS3B02G272200	1.44928	0.134161	0.0170999	0.0383142	0.1	0.0748503	0.239808	0.105875	0.0143388	0.0649933	10	13	6	0	5	7	11	5	5
TraesCS5D02G130200	CBSCBSPB3	TraesCS5D02G130200	1.44928	0.744752	0.452425	0.824912	0.364649	0.668022	0.820135	0.790218	0.327299	0.620459	136	12	89	9	87	84	53	42	37
TraesCS5D02G350400	-	TraesCS5D02G350400	1.44928	0.21138	0.0341997	0.262569	0.364039	0.275693	0.254324	0.326985	0.183543	0.235365	119	7	65	9	81	68	71	39	36
TraesCS4D02G078800	LBD36	TraesCS4D02G078800	1.44928	0.0277778	0.745122	0.284467	0.126853	0.195718	0.0968992	0.192652	0.067818	0.104649	71	4	61	4	54	52	49	31	23
TraesCS4D02G278100	-	TraesCS4D02G278100	1.44928	0.217494	0.30295	0.50099	0.242896	0.146886	0.321606	0.298222	0.152729	0.153985	95	3	46	5	74	63	67	33	34
TraesCS6B02G199800	ERF3	TraesCS6B02G199800	1.44928	0.572471	0.461907	0.496916	0.530799	0.206359	0.53841	0.549644	0.501996	0.475596	69	3	33	3	47	39	30	17	20
TraesCS6D02G238900	GRF10	TraesCS6D02G238900	1.44928	0.0277778	0	0	0	0	0	0.0190985	0.0274416	0	24	2	16	1	37	16	15	15	9
TraesCS2D02G398600	ROC4	TraesCS2D02G398600	1.44928	0.0277778	0.133199	0	0.0268528	0.0385802	0	0.0447569	0.0417932	0.0128601	32	2	19	0	22	16	12	9	5
TraesCS5A02G373500	NFYA10	TraesCS5A02G373500	1.24547	0.142211	0.0170999	0	0	0	0	0.0747422	0.0178601	0.0128601	35	32	12	1	12	8	6	6	9
TraesCS5B02G426600	CRF4	TraesCS5B02G426600	1.24547	0.317813	0.612349	0.454492	0.551265	0.838114	0.613463	0.683687	0.532959	0.423368	490	32	305	40	353	456	254	192	175
TraesCS2A02G157600	MYB306	TraesCS2A02G157600	1.24547	0.282485	0.294366	0.229049	0.295858	0.763264	0.590301	0.765416	0.284055	0.669847	477	27	210	21	246	181	221	148	121
TraesCS6D02G304300	ROC8	TraesCS6D02G304300	1.24547	0.128047	0	0.0379939	0.0405844	0.224551	0.636468	0.0381971	0.0268933	0.090367	203	27	103	8	118	94	88	67	82
TraesCS5B02G066400	WRKY74	TraesCS5B02G066400	1.24547	0.336655	0.618228	0.67627	0.342219	0.706099	0.758002	0.34428	0.294967	0.297209	534	26	375	40	398	388	303	230	209
TraesCS6A02G239200	GATA5	TraesCS6A02G239200	1.24547	0.395033	0.479007	0.245513	0.256017	0.288256	0.353708	0.381643	0.294337	0.214128	124	24	98	13	84	89	53	55	43
TraesCS2A02G270200	WRKY11	TraesCS2A02G270200	1.24547	0.314492	0.309043	0.462724	0.229165	0.938592	0.744813	0.254274	0.247098	0.407165	365	22	191	16	282	178	183	132	111
TraesCS2B02G406400	GATA12	TraesCS2B02G406400	1.24547	0.620027	0.749147	0.44045	0.611425	0.905024	0.957344	0.747076	0.545967	0.511369	765	21	372	47	450	501	365	260	172
TraesCS1B02G442000	NFYB4	TraesCS1B02G442000	1.24547	0.160553	0.632978	0.419067	0.310333	0.59869	0.646283	0.598423	0.53404	0.236011	284	19	186	32	203	280	154	120	101
TraesCS4D02G225200	LBD18	TraesCS4D02G225200	1.24547	1.2874	0.0512996	0.408962	0.846429	0.0748503	0.0968992	0.297014	0.0820966	0.221403	177	18	424	9	137	112	102	122	60
TraesCS7D02G409700	ARF19	TraesCS7D02G409700	1.24547	0.205266	0.0537922	0.0766284	0.121753	0.185466	0.136331	0.0490838	0.0586644	0.0552773	137	17	63	9	79	42	29	36	30
TraesCS4B02G072900	Os03g0620500	TraesCS4B02G072900	1.24547	0.0216638	0.238363	0.0379939	0	0.0874126	0	0.0376928	0.0733107	0.0128601	5	16	3	0	3	1	6	2	3
TraesCS6A02G324500	ROC8	TraesCS6A02G324500	1.24547	0.128047	0	0.0379939	0.0405844	0.149701	0.673988	0.0904082	0.00537866	0.0257202	224	15	108	7	174	121	91	75	91
TraesCS7D02G244300	BHLH130	TraesCS7D02G244300	1.24547	0.379483	0.593032	0.296853	0.794095	0.618688	0.295668	0.484025	0.807292	0.410996	654	14	474	46	492	705	324	226	191
TraesCS5A02G424600	CRF4	TraesCS5A02G424600	1.24547	0.183602	0.41442	0.078089	0.215433	0.301711	0.290967	0.451224	0.283801	0.425143	341	13	213	24	230	375	178	120	107
TraesCS6D02G144900	-	TraesCS6D02G144900	1.24547	0.414761	0.582991	0.2708	0.738821	0.708917	0.30988	0.714179	0.455819	0.175904	247	13	166	24	185	300	171	112	104
TraesCS7D02G466400	-	TraesCS7D02G466400	1.24547	0.0216638	0	0	0	0	0	0	0.00444998	0	20	13	3	0	2	3	1	1	0
TraesCS6D02G245300	GRF4	TraesCS6D02G245300	1.24547	0.169988	0	0	0	0	0.0788644	0.0844294	0.0548959	0.0330214	37	10	33	1	20	29	27	11	13
TraesCS7B02G316600	ARF19	TraesCS7B02G316600	1.24547	0.324427	0.0733847	0.16038	0	0.157137	0	0.0163613	0.0268203	0.0535291	49	9	28	3	38	24	7	9	9
TraesCS7B02G304000	WIP2	TraesCS7B02G304000	1.24547	0.0711053	0.0256148	0.0191571	0	0	0	0.0660885	0.0713931	0	9	9	11	3	8	23	11	2	3
TraesCS6D02G135500	ARR12	TraesCS6D02G135500	1.24547	0.0988831	0.261486	0.418253	0.662472	0.28915	0.214892	0.121151	0.0642839	0.175175	31	9	20	4	26	15	16	11	9
TraesCS6D02G146600	-	TraesCS6D02G146600	1.24547	0.0711053	0	0	0.126853	0.0822865	0.13442	0.103918	0.0134704	0	73	8	38	3	49	28	30	17	17
TraesCS4D02G194300	BHLH140	TraesCS4D02G194300	1.24547	0.328605	0.366507	0.441466	0.390825	0.399766	0.38817	0.253579	0.2027	0.237754	171	7	108	8	124	113	77	67	54
TraesCS7A02G062700	Os06g0194400	TraesCS7A02G062700	1.24547	0.394982	0.837212	0.396848	0.234875	0.582531	0.596305	0.228616	0.149781	0.154667	304	7	109	10	123	100	81	53	59
TraesCS4D02G026100	TCX2	TraesCS4D02G026100	1.24547	0.0772193	0.429027	0.230065	0.189191	0.59036	0.579753	0.115677	0.0701032	0.123761	251	7	63	3	77	55	46	36	27
TraesCS3D02G176400	At4g25210	TraesCS3D02G176400	1.24547	0.386983	0.583062	0.328396	0.108022	0.905528	0.368224	0.388935	0.12466	0.203331	172	6	129	12	143	99	71	50	49
TraesCS2D02G158500	Os06g0194400	TraesCS2D02G158500	1.24547	0	0.371705	0.152296	0.484505	0.337981	0.466731	0.233725	0.275088	0.176918	221	6	124	18	133	185	105	77	38
TraesCS6B02G391100	BHLH82	TraesCS6B02G391100	1.24547	0.82355	0.176056	0.154077	0.404557	0.237113	0.359712	0.558261	0.385602	0.213063	95	5	75	5	75	119	53	42	31
TraesCS5D02G335700	MYB1	TraesCS5D02G335700	1.24547	0.0277778	0.0170999	0.057151	0.234875	0.25288	0.156851	0.271301	0.198864	0.097348	57	5	27	7	46	74	36	27	28
TraesCS4A02G176200	SCL9	TraesCS4A02G176200	1.24547	0.64969	0.671196	0.884484	0.363362	0.691228	0.372621	0.160433	0.291598	0.1853	84	5	48	8	94	43	25	33	17
TraesCS1D02G278200	DIVARICATA	TraesCS1D02G278200	1.24547	0.0555556	0.105022	0.167103	0.0268528	0.260317	0.254324	0.29696	0.197381	0.290606	110	4	101	6	92	129	90	52	35
TraesCS5B02G073100	Os10g0391300	TraesCS5B02G073100	1.24547	0.0277778	0.39732	0.24099	0.121753	0.299401	0.0993842	0.0190985	0.0468042	0.0257202	73	4	38	1	33	28	19	15	11
TraesCS6B02G471600	Os02g0831100	TraesCS6B02G471600	1.24547	0.0833333	0.448619	0.188041	0.0405844	0.330041	0.309306	0.205076	0.0968633	0.0809974	82	4	52	6	53	49	39	26	26
TraesCS2A02G514300	ERF008	TraesCS2A02G514300	1.24547	0.26455	0.0256148	0.108171	0.147929	0.17803	0.156851	0.210297	0.203841	0.492603	60	4	44	5	37	54	42	27	26
TraesCS5A02G066400	Os10g0391300	TraesCS5A02G066400	1.24547	0.183602	0.43152	0.383821	0.0811688	0.268257	0	0.0381971	0.046671	0.0389267	71	3	36	3	27	31	19	25	8
TraesCS5D02G112900	Os12g0515500	TraesCS5D02G112900	1.24547	0.410532	0.3861	0.26475	0.309656	0.347729	0.0394322	0.0513168	0.173496	0.0716278	107	3	56	6	66	70	43	33	29
TraesCS7A02G179800	Os06g0194400	TraesCS7A02G179800	1.24547	0.530529	0.455955	0.689178	0.485726	0.662897	0.743486	0.274657	0.197688	0.110528	163	3	55	5	43	39	27	13	17
TraesCS1B02G320000	PHL1	TraesCS1B02G320000	1.24547	0.120547	0.246878	0.409923	0.395992	0.39425	0.471127	0.723514	0.449518	0.450821	86	2	57	10	62	131	73	38	43
TraesCS3A02G365200	MYB44	TraesCS3A02G365200	1.24547	0.636076	0.277548	0.213329	0.242219	0.43514	0	0.174448	0.079431	0.062232	67	2	51	3	67	27	29	10	15
TraesCS5D02G132900	LHW	TraesCS5D02G132900	1.24547	0.828564	0.45332	0.469848	0.477704	0.60523	0.942255	0.361205	0.21301	0.330215	33	2	26	3	20	19	18	8	10
TraesCS5D02G321000	HSFB2C	TraesCS5D02G321000	1.24547	0.418032	0.156321	0.403939	0.451528	0.419764	0.649072	0.352276	0.279085	0.0848082	89	2	49	10	68	46	34	28	31
TraesCS2D02G173200	Os10g0391300	TraesCS2D02G173200	1.24547	0.42276	0.141714	0.268379	0.0674373	0.389516	0.0993842	0.333431	0.206503	0.215498	136	2	73	12	70	65	39	26	10
TraesCS6D02G273500	MADS57	TraesCS6D02G273500	1.24547	0.212766	0	0.327311	0	0	0.119904	0.118414	0.138916	0.154321	1	1	3	0	5	0	3	0	2
TraesCS7A02G122000	MADS5	TraesCS7A02G122000	1.24547	0.323877	0.0768443	0.41531	0.0268528	0.268257	0.410871	0.848398	0.371571	0.547512	88	1	74	9	70	81	75	31	33
TraesCS5A02G029900	NFYA2	TraesCS5A02G029900	1.04167	0.262758	0.482819	0.274042	0.181169	0.533699	0.059952	0.133767	0.0336285	0.059088	99	62	26	3	42	24	32	14	15
TraesCS2B02G534000	AIL5	TraesCS2B02G534000	1.04167	0.0216638	0	0.0379939	0.1	0	0.179856	0.0665928	0.0556312	0.0257202	46	20	13	0	20	32	11	9	7
TraesCS2B02G168700	At3g47120	TraesCS2B02G168700	1.04167	0.655304	0.757938	0.846843	0.767242	0.878614	0.902249	0.509103	0.326057	0.424124	361	14	225	17	255	220	177	129	101
TraesCS5A02G043400	HOX33	TraesCS5A02G043400	1.04167	0.0277778	0.218771	0.0911155	0	0.17803	0.429784	0.499123	0.0660208	0.285704	66	12	52	4	67	43	51	25	25
TraesCS4A02G260600	SCL4	TraesCS4A02G260600	1.04167	0.410532	0.749077	0.492714	0.490825	0.924631	0.9037	0.791052	0.41285	0.5249	284	9	159	12	183	194	142	99	67
TraesCS1D02G314900	bdp1	TraesCS1D02G314900	1.04167	0.404418	0.36547	0.530307	0.324065	0.590862	0.491951	0.289178	0.210351	0.268686	113	7	50	7	63	51	40	29	21
TraesCS7B02G138900	ARF21	TraesCS7B02G138900	1.04167	0.331927	0.673689	0.700299	0.793814	0.886555	0.669896	0.71944	0.809156	0.25548	106	7	79	20	84	133	62	50	38
TraesCS7B02G200700	KAN3	TraesCS7B02G200700	1.04167	0.0555556	0.139221	0	0.0405844	0	0.059952	0.179028	0.0574155	0.0132066	38	6	19	4	21	18	24	10	13
TraesCS2B02G370400	NLP2	TraesCS2B02G370400	1.04167	0.410532	0.427777	0.464185	0.121753	0.0437063	0.28936	0.415878	0.170367	0.281913	124	6	74	3	96	76	53	45	32
TraesCS5D02G515000	Os06g0194400	TraesCS5D02G515000	1.04167	0.23443	0.0427146	0	0.0674373	0.0385802	0.392263	0.0851871	0.0865466	0.0517868	59	5	47	3	36	32	47	29	23
TraesCS1A02G141900	rnf141	TraesCS1A02G141900	1.04167	0.837521	0.673476	0.680428	0.498847	0.504865	0.339192	0.447592	0.355904	0.390032	103	4	91	6	68	76	46	39	35
TraesCS7D02G250100	ARF21	TraesCS7D02G250100	1.04167	0.382754	0.275056	0.53629	0.364649	0.766582	0.783222	0.68047	0.846407	0.365682	151	3	72	20	72	137	81	44	38
TraesCS5A02G144000	SCR2	TraesCS5A02G144000	1.04167	0.132275	0.195649	0.19061	0.766698	0.231987	0.272359	0.130448	0.168076	0.0514403	59	3	43	5	38	62	33	27	15
TraesCS2B02G322200	ZHD8	TraesCS2B02G322200	1.04167	0	0.0195925	0	0	0	0.119904	0.0190985	0.00537866	0.0128601	24	3	8	0	8	4	8	3	9
TraesCS6A02G190600	SPT	TraesCS6A02G190600	1.04167	0.308877	0.542627	0.732656	0.167437	0.456425	0.307395	0.182622	0.147731	0.0257202	47	2	42	0	56	33	22	14	21
TraesCS4B02G065300	GATA28	TraesCS4B02G065300	1.04167	0.0277778	0.0683294	0.254337	0.121143	0.0437063	0.0394322	0.184135	0.121278	0.0660427	30	1	28	2	39	37	12	18	17
