# Supplementary material for: The TaBBM-TaWRKY41-TacAGPS1a module affects starch synthesis and grain quality by regulating embryo and endosperm development in wheat
Source: Research Square preprint supplement (doi:10.21203/rs.3.rs-8619315/v1), 2026-01-27
Supplement: Supplementary file 5 [file 332ebb7498f849984a0e3a47.xlsx]

## Sheet: Sheet1
Supplementary Data 9. List of extreme varieties and grain phenotypes for the two TaBBM-B1 haplotypes
				TWG			Grain width			Grain length
Symple	Hap	Name	19Nanyang	19Suqian	19Yangling	19Nanyang	19Suqian	19Yangling	19Nanyang	19Suqian	19Yangling
25G-250	1	Fang6	39.331	35.882	31.476	0.37	0.411	0.457	4.263	4.351	4.156
25G-274	1	Attila	36.246	31.738	30.688	0.412	0.35	0.405	4.226	4.127	4.068
25G-352	1	Shijiazhuang54	34.162	26.935	29.957	0.4	0.449	0.426	4.058	3.824	4.002
25G-462	1	Jiangdongmen	30.771	27.538	30.666	0.356	0.429	0.351	4.127	4.07	4.198
25G-471	1	Myingafu	39.948	31.981	26.826	0.449	0.419	0.476	4.424	4.194	4.093
25G-474	1	92R137	38.17	38.304	39.097	0.4	0.469	0.438	4.418	4.528	4.615
25G-538	1	Huabei187	38.105	36.115	31.661	0.363	0.401	0.449	4.299	4.313	4.202
25G-540	1	Lumai21	35.227	28.556	23.869	0.409	0.39	0.483	4.147	3.951	3.926
25G-547	1	Baihuomai	27.75	28.05	28.795	0.342	0.351	0.352	3.859	3.951	3.999
25G-587	1	Een1hao	42.127	39.91	32.875	0.402	0.39	0.416	4.528	4.605	4.362
25G-007	2	Zhoumai18	50.366	49.923	44.183	0.372	0.366	0.363	4.798	4.768	4.574
25G-054	2	Jimai22	48.71	41.839	43.894	0.341	0.407	0.397	4.822	4.593	4.549
25G-178	2	Luohan11	54.593	34.491	48.959	0.359	0.427	0.452	4.934	4.291	4.809
25G-222	2	Chuanmai42	45.664	42.16	45.011	0.384	0.42	0.496	4.629	4.667	4.692
25G-253	2	Xuzhou24	50.276	43.032	42.97	0.378	0.395	0.485	4.801	4.648	4.656
25G-314	2	Han4564	42.659	30.077	41.211	0.367	0.439	0.477	4.436	4.095	4.505
25G-369	2	Zhongyou9507	54.655	50.663	49.371	0.31	0.411	0.437	5.1	NA	4.946
25G-388	2	Jinan13	50.332	42.284	48.612	0.318	0.461	0.516	4.875	4.796	4.899
25G-397	2	Fengkang8hao	48.628	38.368	40.104	0.4	0.447	0.459	4.919	4.501	4.563
25G-436	2	Chang6359	47.974	38.169	35.645	0.371	0.494	0.477	4.81	4.553	4.482
