# Supplementary material for: The TaBBM-TaWRKY41-TacAGPS1a module affects starch synthesis and grain quality by regulating embryo and endosperm development in wheat
Source: Research Square preprint supplement (doi:10.21203/rs.3.rs-8619315/v1), 2026-01-27
Supplement: Supplementary file 6 [file 76e1d00623ab81371894c6de.xlsx]

## Sheet: Sheet1
Supplementary Data 6. DAP-seq identified motif.
<!-- Begin document body -->
<fimo version="5.0.5" release="Mon Mar 18 20:12:19 2019 -0700">
xmlns:xsi="http://www.w3.org/2001/XMLSchema-instance" xsi:schemaLocation= xmlns:fimo="http://noble.gs.washington.edu/schema/fimo" >
<command-line>fimo --parse-genomic-coord --verbosity 1 --bgfile --motif-- --thresh 1e-4 --oc /public2/Bio/Project/GDE21110632-1/GDE21110632-1_std_1/pipe/5.motif/IP/fimo/fimo_MEME-3_WTTTYCTCYAAGTCC --bgfile --motif-- --motif WTTTYCTCYAAGTCC /public2/Bio/Project/GDE21110632-1/GDE21110632-1_std_1/pipe/5.motif/IP/meme-chip/meme_out/meme.xml /public2/Bio/Project/GDE21110632-1/GDE21110632-1_std_1/pipe/…
<settings>
<setting name="output directory">/public2/Bio/Project/GDE21110632-1/GDE21110632-1_std_1/pipe/5.motif/IP/fimo/fimo_MEME-3_WTTTYCTCYAAGTCC</setting>
<setting name="MEME file name">/public2/Bio/Project/GDE21110632-1/GDE21110632-1_std_1/pipe/5.motif/IP/meme-chip/meme_out/meme.xml</setting>
<setting name="sequence file name">/public2/Bio/Project/GDE21110632-1/GDE21110632-1_std_1/pipe/5.motif/IP/IP.all.formotif.fa</setting>
<setting name="background file name">--motif--</setting>
<setting name="allow clobber">true</setting>
<setting name="compute q-values">true</setting>
<setting name="parse genomic coord.">true</setting>
<setting name="text only">false</setting>
<setting name="scan both strands">true</setting>
<setting name="output threshold">0.0001</setting>
<setting name="threshold type">p-value</setting>
<setting name="max stored scores">100000</setting>
<setting name="pseudocount">0.1</setting>
<setting name="verbosity">1</setting>
<setting name="selected motif">WTTTYCTCYAAGTCC</setting>
</settings>
<sequence-data num-sequences="29435" num-residues="14746935"/>
<alphabet name="DNA" like="dna">
<letter id="A" symbol="A" complement="T" name="Adenine" colour="CC0000"/>
<letter id="C" symbol="C" complement="G" name="Cytosine" colour="0000CC"/>
<letter id="G" symbol="G" complement="C" name="Guanine" colour="FFB300"/>
<letter id="T" symbol="T" aliases="U" complement="A" name="Thymine" colour="008000"/>
<letter id="N" symbol="N" aliases="X." equals="ACGT" name="Any base"/>
<letter id="V" symbol="V" equals="ACG" name="Not T"/>
<letter id="H" symbol="H" equals="ACT" name="Not G"/>
<letter id="D" symbol="D" equals="AGT" name="Not C"/>
<letter id="B" symbol="B" equals="CGT" name="Not A"/>
<letter id="M" symbol="M" equals="AC" name="Amino"/>
<letter id="R" symbol="R" equals="AG" name="Purine"/>
<letter id="W" symbol="W" equals="AT" name="Weak"/>
<letter id="S" symbol="S" equals="CG" name="Strong"/>
<letter id="Y" symbol="Y" equals="CT" name="Pyrimidine"/>
<letter id="K" symbol="K" equals="GT" name="Keto"/>
</alphabet>
<motif name="GCACGSAWHYCGAGG" alt="MEME-1" width="15" best-possible-match="GCACGGATACCGAGG"/>
<motif name="WCTCCGGCGAG" alt="MEME-2" width="11" best-possible-match="ACTCCGGCGAG"/>
<motif name="WTTTYCTCYAAGTCC" alt="MEME-3" width="15" best-possible-match="TTTTCCTCTAAGTCC"/>
<motif name="YCRGATCTAGGGTTT" alt="MEME-4" width="15" best-possible-match="TCAGATCTAGGGTTT"/>
<motif name="AGGTTGACYYC" alt="MEME-5" width="11" best-possible-match="AGGTTGACCCC"/>
<motif name="RGATCTGGATC" alt="MEME-6" width="11" best-possible-match="AGATCTGGATC"/>
<motif name="TTYDTYNTTTTTTTT" alt="MEME-7" width="15" best-possible-match="TTCGTCGTTTTTTTT"/>
<motif name="AACCGAWCGGTTTTT" alt="MEME-8" width="15" best-possible-match="AACCGAACGGTTTTT"/>
<motif name="CGACTGTTGCGGGAT" alt="MEME-9" width="15" best-possible-match="CGACTGTTGCGGGAT"/>
<motif name="WTYWTYRCATHATAW" alt="MEME-10" width="15" best-possible-match="TTTTTCGCATTATAA"/>
<background source="--motif--">
<value letter="A">0.240</value>
<value letter="C">0.260</value>
<value letter="G">0.260</value>
<value letter="T">0.240</value>
</background>
<cisml-file>cisml.xml</cisml-file>
</fimo>
