# Supplementary material for: The TaBBM-TaWRKY41-TacAGPS1a module affects starch synthesis and grain quality by regulating embryo and endosperm development in wheat
Source: Research Square preprint supplement (doi:10.21203/rs.3.rs-8619315/v1), 2026-01-27
Supplement: Supplementary file 7 [file 840d4b16c46c6ffec01ac580.xlsx]

## Sheet: Sheet1
Supplementary Data 3. List of differentially expressed genes.
List of differentially expressed genes of 2 DAP embryo.
id	Fielder-2DAP-1_count	Fielder-2DAP-2_count	Fielder-2DAP-3_count	amiR-BBM-2DAP-1_count	amiR-BBM-2DAP-2_count	amiR-BBM-2DAP-3_count	Fielder-2DAP-1_fpkm	Fielder-2DAP-2_fpkm	Fielder-2DAP-3_fpkm	amiR-BBM-2DAP-1_fpkm	amiR-BBM-2DAP-2_fpkm	amiR-BBM-2DAP-3_fpkm	Fielder-2DAP_mean	amiR-BBM-2DAP_mean	log2(fc)	PValue	FDR	Symbol	Description
TraesCS3D02G426700LC	44	29	28	597	394	491	2.6	1.79	2.02	37.09	25.1	31.37	2.13666666666667	31.1866666666667	3.86749559973369	3.84319057813008e-62	4.18296705714256e-57	--	TKW10628.1 hypothetical protein SEVIR_6G178300v2 [Setaria viridis]
TraesCS7A02G277600	644	560	442	1800	1753	1749	19.59	17.8	16.2	57.47	57.37	57.37	17.8633333333333	57.4033333333333	1.68413319934019	4.62140111479139e-46	2.51498959367505e-41	MDAR4	EMS50440.1 Monodehydroascorbate reductase [Triticum urartu]
TraesCS2A02G565600	32	23	28	287	270	269	0.72	0.53	0.75	6.68	6.43	6.42	0.666666666666667	6.51	3.28762004411207	6.7593314776192e-41	2.45230799118517e-36	NPF5.10	SPT21023.1 unnamed protein product [Triticum aestivum]
TraesCS2A02G562400	50	42	38	228	248	255	1.56	1.36	1.42	7.48	8.34	8.59	1.44666666666667	8.13666666666667	2.49170534733667	2.29344156195386e-27	6.24051182611549e-23	AMI1	VAH39545.1 unnamed protein product [Triticum turgidum subsp. durum] [Triticum turgidum]
TraesCS3D02G340800	104	70	64	787	369	399	7.82	5.51	5.8	61.99	29.8	32.27	6.37666666666667	41.3533333333333	2.69712925122564	1.16190740240658e-26	2.52926327170669e-22	At1g07660	XP_016507811.1 PREDICTED: uncharacterized protein LOC107825453 [Nicotiana tabacum]
TraesCS7D02G551200LC	169	183	147	18	22	12	3.48	3.95	3.65	0.4	0.48	0.26	3.69333333333333	0.38	-3.28085	1.79688112928504e-25	3.25957231654188e-21	--	XP_020173320.1 uncharacterized protein LOC109758871 [Aegilops tauschii subsp. tauschii] [Aegilops tauschii]
MSTRG.54027	319	407	262	68	19	34	5.06	6.7	4.93	1.09	0.32	0.58	5.56333333333333	0.663333333333333	-3.06814	3.12839830494212e-25	4.86425714154579e-21	GPA1	guanine nucleotide-binding protein alpha-1 subunit-like isoform X1 [Triticum dicoccoides]
TraesCS3A02G178200	10	9	6	103	142	111	0.61	0.54	0.42	6.29	8.85	6.89	0.523333333333333	7.34333333333333	3.81063303080926	1.40149075789867e-21	1.90674569475561e-17	--	VAH59906.1 unnamed protein product [Triticum turgidum subsp. durum] [Triticum turgidum]
TraesCS2D02G566500	0	0	0	399	432	433	0	0	0	11.35	12.61	12.66	0.001	12.2066666666667	13.5753816699635	6.315504843925e-21	7.63762069686268e-17	OST1B	SPT20948.1 unnamed protein product [Triticum aestivum]
TraesCS5B02G130900LC	86	61	57	246	290	293	0.9	0.67	0.72	2.7	3.27	3.31	0.763333333333333	3.09333333333333	2.01877720703063	7.46926331874861e-21	8.12962088875917e-17	Tf2-12	ABA97970.1 retrotransposon protein, putative, unclassified, expressed [Oryza sativa Japonica Group]
TraesCS6B02G430500	680	428	464	153	168	144	44.36	29.18	36.45	10.47	11.79	10.13	36.6633333333333	10.7966666666667	-1.76375	8.51342630523496e-20	8.42372574989162e-16	--	VAI63051.1 unnamed protein product [Triticum turgidum subsp. durum] [Triticum turgidum]
TraesCS7A02G184800	427	322	294	81	104	47	25.57	20.14	21.19	5.09	6.7	3.03	22.3	4.94	-2.17446	4.48208004954183e-19	4.06528395560152e-15	--	VAI72234.1 unnamed protein product [Triticum turgidum subsp. durum] [Triticum turgidum]
TraesCS4B02G369720LC	135	168	92	17	16	18	4.42	5.74	3.64	0.58	0.55	0.62	4.6	0.583333333333333	-2.97924	3.32100642395476e-18	2.78047430915123e-14	--	VAI07271.1 unnamed protein product [Triticum turgidum subsp. durum] [Triticum turgidum]
TraesCS2D02G342600	41	25	33	187	158	150	0.67	0.54	0.72	3.41	3.33	3.06	0.643333333333333	3.26666666666667	2.34418090173449	2.87536010880551e-17	2.23540764001786e-13	--	SPT18827.1 unnamed protein product [Triticum aestivum]
TraesCS5A02G648300LC	30	29	15	120	186	142	0.49	0.49	0.29	2.06	3.25	2.5	0.423333333333333	2.60333333333333	2.62049405136981	5.28876311425204e-17	3.83756177412204e-13	ZMYM1	XP_020169530.1 zinc finger MYM-type protein 1-like [Aegilops tauschii subsp. tauschii] [Aegilops tauschii]
TraesCSU02G295000LC	0	3	4	81	90	101	0	0.11	0.16	2.84	3.25	3.65	0.09	3.24666666666667	5.17289045991888	7.41273496285763e-17	5.04255928807742e-13	--	XP_020176785.1 protein FAR1-RELATED SEQUENCE 5-like isoform X1 [Aegilops tauschii subsp. tauschii] [Aegilops tauschii]
MSTRG.57240	8	1	2	97	81	78	0.15	0.02	0.05	1.9	1.63	1.57	0.0733333333333333	1.7	4.53492181822156	1.4940359663088e-16	9.56543344758918e-13	--	NHL domain-containing protein [Zea mays]
TraesCS2D02G431110LC	89	98	65	2	1	5	2.45	2.85	2.16	0.06	0.03	0.14	2.48666666666667	0.0766666666666667	-5.01947	5.45447344921176e-16	3.29816858158699e-12	--	SPT18889.1 unnamed protein product [Triticum aestivum]
TraesCS5D02G080200	150	101	103	16	22	7	3.36	2.36	2.78	0.38	0.53	0.17	2.83333333333333	0.36	-2.97643	2.52759764717181e-15	1.44792766060961e-11	--	XP_020193664.1 uncharacterized protein LOC109779454 isoform X1 [Aegilops tauschii subsp. tauschii] [Aegilops tauschii]
TraesCS2A02G565800	0	0	0	82	138	156	0	0	0	1.21	2.07	2.36	0.001	1.88	10.876516946565	1.14864074323646e-14	6.25096035673e-11	RGA5	XP_020184119.1 disease resistance protein RPM1-like, partial [Aegilops tauschii subsp. tauschii] [Aegilops tauschii]
TraesCS6A02G354600	9	2	7	113	73	63	0.14	0.03	0.13	1.84	1.22	1.05	0.1	1.37	3.77610398807316	1.69214783197872e-14	8.73306101484221e-11	--	VAI50627.1 unnamed protein product [Triticum turgidum subsp. durum] [Triticum turgidum]
TraesCS2B02G555400	11	4	16	119	92	83	0.12	0.04	0.19	1.29	1.02	0.92	0.116666666666667	1.07666666666667	3.20610733774896	1.76521110910896e-14	8.73306101484221e-11	LOX1.5	XP_020166394.1 seed linoleate 9S-lipoxygenase-3-like isoform X1 [Aegilops tauschii subsp. tauschii] [Aegilops tauschii]
TraesCS2D02G566400	0	0	0	114	110	99	0	0	0	2.09	2.07	1.86	0.001	2.00666666666667	10.9705852709259	3.48777757959006e-14	1.65049217191375e-10	SUVR4	XP_020160631.1 probable inactive histone-lysine N-methyltransferase SUVR1 [Aegilops tauschii subsp. tauschii] [Aegilops tauschii]
TraesCS5D02G401500	179	153	118	357	353	385	6.71	5.97	5.33	14.01	14.21	15.54	6.00333333333333	14.5866666666667	1.28081455688628	7.20730083280635e-14	3.26854095809782e-10	MADS14	AAO72630.1 MADS box transcription factor AP1 [Triticum monococcum]
TraesCS2A02G416300	140	128	117	525	308	312	12.6	12	12.64	49.53	29.81	30.26	12.4133333333333	36.5333333333333	1.5573228202891	1.19359361823506e-13	5.19647692009287e-10	At1g07660	XP_016507811.1 PREDICTED: uncharacterized protein LOC107825453 [Nicotiana tabacum]
TraesCS6D02G052300	86	118	67	16	11	10	2.29	3.28	2.15	0.45	0.31	0.29	2.57333333333333	0.35	-2.87821	4.70650430089809e-13	1.89726160968166e-09	At5g56820	VAI41974.1 unnamed protein product [Triticum turgidum subsp. durum] [Triticum turgidum]
TraesCS5B02G149710LC	0	0	0	82	65	98	0	0	0	4.43	3.6	5.44	0.001	4.49	12.1324997296285	7.59684288593228e-13	2.95302848767056e-09	--	XP_020165174.1 uncharacterized protein LOC109750623 [Aegilops tauschii subsp. tauschii] [Aegilops tauschii]
TraesCS3D02G148200	3	6	3	65	50	74	0.09	0.19	0.11	2.1	1.66	2.46	0.13	2.07333333333333	3.99536855126835	8.87326022782742e-13	3.33025695329988e-09	BZIP02	XP_020191576.1 basic leucine zipper 2-like [Aegilops tauschii subsp. tauschii] [Aegilops tauschii]
TraesCS2D02G380300LC	0	0	0	98	64	59	0	0	0	3.98	2.67	2.46	0.001	3.03666666666667	11.5682728379683	2.49896307610019e-12	9.06632133886069e-09	--	-
TraesCS4B02G369710LC	78	116	85	9	21	9	2.11	3.28	2.78	0.26	0.62	0.27	2.72333333333333	0.383333333333333	-2.8287	3.2039670348743e-12	1.12491282594437e-08	--	VAI07270.1 unnamed protein product [Triticum turgidum subsp. durum] [Triticum turgidum]
TraesCS3D02G342400	15	8	3	137	57	59	1.83	0.97	0.4	17.02	7.21	7.55	1.06666666666667	10.5933333333333	3.31197531446115	2.02048057449137e-11	6.66397352146108e-08	H2B.10	XP_020154110.1 histone H2B.3-like [Aegilops tauschii subsp. tauschii] [Aegilops tauschii]
TraesCS3B02G487900	292	281	251	136	79	69	5.32	5.35	5.51	2.6	1.54	1.36	5.39333333333333	1.83333333333333	-1.55671	4.15160868551021e-11	1.32901541452828e-07	CDC48C	CDM86020.1 unnamed protein product [Triticum aestivum]
TraesCS2A02G564000	101	84	77	232	230	204	2.03	1.76	1.86	4.88	4.96	4.41	1.88333333333333	4.75	1.33463914663692	4.30681985996708e-11	1.33931022965336e-07	Os03g0167500	VAH55020.1 unnamed protein product [Triticum turgidum subsp. durum] [Triticum turgidum]
TraesCS4B02G071600	0	4	0	74	39	54	0	0.21	0	3.81	2.04	3.3	0.07	3.05	5.44531051039264	1.54203284804005e-10	4.66212214482021e-07	--	VAI02372.1 unnamed protein product [Triticum turgidum subsp. durum] [Triticum turgidum]
TraesCS2D02G026900	135	151	144	309	315	324	3.64	4.26	4.68	8.74	9.14	9.42	4.19333333333333	9.1	1.11776902892793	2.58236093845964e-10	7.59639856494286e-07	At4g34880	SPT15647.1 unnamed protein product [Triticum aestivum]
TraesCS3A02G421700	253	293	215	637	439	490	11.66	14.15	12.1	33.2	23.58	26.4	12.6366666666667	27.7266666666667	1.13365822847571	2.79090012717343e-10	7.97461070518578e-07	RABC1	KAE8776852.1 ras-related protein RABC1 [Hordeum vulgare]
TraesCS7B02G375300	86	47	60	234	167	182	2.63	1.5	2.21	7.51	5.5	6.01	2.11333333333333	6.34	1.58496250072116	2.85746931305524e-10	7.97461070518578e-07	PGK3	VAI92249.1 unnamed protein product [Triticum turgidum subsp. durum] [Triticum turgidum]
TraesCSU02G171400LC	1	0	3	32	64	60	0.04	0	0.15	1.37	2.83	2.66	0.0633333333333333	2.28666666666667	5.17413725272923	4.25191162850212e-10	1.13123818086435e-06	FRS8	KAE8814743.1 Protein FAR1-RELATED SEQUENCE 5 [Hordeum vulgare]
TraesCS4A02G029300LC	13	15	10	50	84	95	0.23	0.3	0.21	1.02	1.58	1.8	0.246666666666667	1.46666666666667	2.57190634789571	4.2613321648495e-10	1.13123818086435e-06	FRS3	KAE8814743.1 Protein FAR1-RELATED SEQUENCE 5 [Hordeum vulgare]
TraesCS4D02G060400	35	51	32	160	113	124	1.06	1.82	1.14	5.96	3.6	3.94	1.34	4.5	1.74769200075926	4.53552642299799e-10	1.17536007477506e-06	SCPL18	VAI02080.1 unnamed protein product [Triticum turgidum subsp. durum] [Triticum turgidum]
MSTRG.58814	0	0	0	64	32	35	0	0	0	3.16	1.62	1.78	0.001	2.18666666666667	11.0945175987843	5.68342679545342e-10	1.4385810601022e-06	--	uncharacterized protein LOC119341193 isoform X1 [Triticum dicoccoides]
TraesCS7D02G119900	0	2	3	74	54	26	0	0.05	0.09	1.99	1.49	0.72	0.0466666666666667	1.4	4.90689059560852	6.18789147088394e-10	1.53067339905109e-06	NPF2.3	XP_020182564.1 protein NRT1/ PTR FAMILY 2.3-like [Aegilops tauschii subsp. tauschii] [Aegilops tauschii]
MSTRG.16883	0	0	0	50	32	40	0	0	0	1.55	1.02	1.27	0.001	1.28	10.3219280948874	8.37690396555945e-10	2.02611245447879e-06	--	-
TraesCS7A02G295100LC	1	0	0	62	71	63	0.03	0	0	2.17	2.55	2.26	0.01	2.32666666666667	7.8621207254885	1.10382060910912e-09	2.57254958790541e-06	TY3B-G	XP_023157287.1 protein binding protein isoform X1 [Zea mays]
MSTRG.14567	1	1	4	53	52	32	0.04	0.04	0.18	2.09	2.1	1.3	0.0866666666666667	1.83	4.40022262086411	1.11088496643318e-09	2.57254958790541e-06	--	Tryptophanyl-tRNA synthetase, cytoplasmic [Triticum urartu]
TraesCS3A02G508100	209	191	146	68	55	81	7.2	6.84	6.05	2.45	2.04	3	6.69666666666667	2.49666666666667	-1.42344	4.09559138268446e-09	9.28683878505748e-06	--	EMS53643.1 hypothetical protein TRIUR3_33544 [Triticum urartu]
TraesCS5B02G510800	42	57	33	0	5	2	1.01	1.44	0.96	0	0.13	0.05	1.13666666666667	0.06	-4.2437	4.70114911150095e-09	1.04424034784668e-05	POB1	VAI39528.1 unnamed protein product [Triticum turgidum subsp. durum] [Triticum turgidum]
TraesCS3B02G335100	76	66	35	163	182	145	2.69	2.47	1.48	5.98	6.85	5.4	2.21333333333333	6.07666666666667	1.45705941469221	6.58795260853291e-09	1.43407869973066e-05	IPK	CDM81503.1 unnamed protein product [Triticum aestivum]
TraesCS2B02G421900	85	115	90	192	249	255	1.07	1.5	1.37	2.53	3.36	3.45	1.31333333333333	3.11333333333333	1.24522692025329	8.76835797866921e-09	1.83530163606988e-05	--	VAH50440.1 unnamed protein product [Triticum turgidum subsp. durum] [Triticum turgidum]
TraesCS1B02G567400LC	10	13	11	49	74	64	0.17	0.23	0.22	0.85	1.32	1.15	0.206666666666667	1.10666666666667	2.42084312096005	9.62403466161169e-09	1.97639538981977e-05	TY3B-G	ADB85398.1 putative retrotransposon protein [Phyllostachys edulis]
TraesCS1B02G278400	136	80	54	19	19	20	2.45	1.51	1.17	0.35	0.36	0.38	1.71	0.363333333333333	-2.23463	1.25593166483766e-08	2.53142330245547e-05	Os05g0428100	VAH19456.1 unnamed protein product [Triticum turgidum subsp. durum] [Triticum turgidum]
TraesCS1A02G200400LC	32	26	31	0	0	0	1.69	1.44	1.98	0	0	0	1.70333333333333	0.001	-10.7341	1.7876962336339e-08	3.53772083208994e-05	--	KAE8810929.1 hypothetical protein D1007_12279 [Hordeum vulgare]
TraesCS4A02G116400	9	12	10	49	56	67	0.49	0.68	0.66	2.8	3.28	3.94	0.61	3.34	2.45296695491117	2.14505147807004e-08	4.16909907008252e-05	PR1	VAH90035.1 unnamed protein product [Triticum turgidum subsp. durum] [Triticum turgidum]
TraesCS2B02G616300	61	69	64	151	157	178	1.68	2.01	2.15	4.39	4.68	5.32	1.94666666666667	4.79666666666667	1.30102631786028	2.23105814772302e-08	4.2601859623916e-05	OST1B	SPT20948.1 unnamed protein product [Triticum aestivum]
TraesCS6B02G061900LC	1	0	0	66	31	44	0.04	0	0	2.44	1.18	1.67	0.0133333333333333	1.76333333333333	7.04712391211403	2.66061748064917e-08	4.9928321932989e-05	--	XP_020178417.1 uncharacterized protein LOC109763948 [Aegilops tauschii subsp. tauschii] [Aegilops tauschii]
TraesCS7D02G180510LC	38	44	55	0	1	0	1.12	1.36	1.94	0	0.03	0	1.47333333333333	0.01	-7.20294	3.08819386334219e-08	5.5101984963939e-05	--	SPT18889.1 unnamed protein product [Triticum aestivum]
TraesCS6B02G234900	89	93	103	32	25	26	2.18	2.4	3.04	0.84	0.66	0.7	2.54	0.733333333333333	-1.79229	3.97335490336917e-08	6.97522453286457e-05	OSA15	VAI57579.1 unnamed protein product [Triticum turgidum subsp. durum] [Triticum turgidum]
TraesCS2A02G525500	37	16	44	153	121	94	0.62	0.27	0.87	2.65	2.11	1.68	0.586666666666667	2.14666666666667	1.87148525947732	6.42564828958331e-08	0.000109277185232271	LOX1.5	VAH38174.1 unnamed protein product [Triticum turgidum subsp. durum] [Triticum turgidum]
TraesCS2D02G077700	133	139	115	43	50	52	1.88	2.05	1.95	0.63	0.76	0.8	1.96	0.73	-1.42489	1.0188559065747e-07	0.000170605070349995	--	SPT16066.1 unnamed protein product [Triticum aestivum]
TraesCS6B02G801110LC	0	0	0	15	36	23	0	0	0	0.36	0.89	0.57	0.001	0.606666666666667	9.2447602343649	1.1516414348585e-07	0.000189917886987022	--	SPT16228.1 unnamed protein product [Triticum aestivum]
TraesCS2D02G381100	22	22	26	62	104	93	0.53	0.55	0.75	1.57	2.69	2.41	0.61	2.22333333333333	1.86584311290054	1.2129752428908e-07	0.00019544100464072	BGLU16	SPT19210.1 unnamed protein product [Triticum aestivum]
TraesCS7D02G057500	116	113	123	44	43	38	2.46	2.5	3.14	0.98	0.98	0.87	2.7	0.943333333333333	-1.51712	1.22104614213109e-07	0.00019544100464072	--	XP_020152036.1 uncharacterized protein LOC109737273 [Aegilops tauschii subsp. tauschii] [Aegilops tauschii]
TraesCS7A02G294900LC	0	0	3	25	38	44	0	0	0.13	0.94	1.47	1.71	0.0433333333333333	1.37333333333333	4.98606080904212	1.3339054673748e-07	0.000210411021702233	--	XP_020158176.1 uncharacterized protein LOC109743495 [Aegilops tauschii subsp. tauschii] [Aegilops tauschii]
TraesCS1A02G165400	2	3	2	45	28	28	0.07	0.11	0.09	1.7	1.08	1.09	0.09	1.29	3.84130225398094	1.48492174253427e-07	0.000230886239113104	TIP3-1	VAH04719.1 unnamed protein product [Triticum turgidum subsp. durum] [Triticum turgidum]
TraesCS3B02G264800	128	95	109	47	33	30	4.55	3.53	4.67	1.75	1.26	1.15	4.25	1.38666666666667	-1.61584	1.58422266689418e-07	0.000242856872235816	At1g28600	CDM83549.1 unnamed protein product [Triticum aestivum]
MSTRG.5438	0	0	0	19	12	44	0	0	0	1.64	1.06	3.89	0.001	2.19666666666667	11.1011002491743	1.63294383987232e-07	0.000246520922848278	--	proline-rich receptor-like protein kinase PERK9 [Triticum dicoccoides]
TraesCS3B02G424700	89	52	84	225	158	192	1.95	1.19	2.22	5.18	3.73	4.54	1.78666666666667	4.48333333333333	1.32730126698621	1.65342355986478e-07	0.000246520922848278	NPF8.1	VAH82599.1 unnamed protein product [Triticum turgidum subsp. durum] [Triticum turgidum]
TraesCS6B02G072300LC	35	60	24	117	120	113	1.16	2.08	0.97	4.07	4.28	4.05	1.40333333333333	4.13333333333333	1.55844798220784	1.93550091010994e-07	0.000284678181834156	KIAA1586	XP_025815385.1 zinc finger MYM-type protein 1-like [Panicum hallii]
TraesCS5D02G013400	0	0	0	20	20	24	0	0	0	0.33	0.34	0.4	0.001	0.356666666666667	8.47843258056736	2.9403757687459e-07	0.00042671125206143	LOX2.1	XP_020196286.1 lipoxygenase 2.1, chloroplastic [Aegilops tauschii subsp. tauschii] [Aegilops tauschii]
TraesCS5D02G049700LC	58	141	65	190	248	252	0.71	1.77	1.07	2.32	3.1	3.37	1.18333333333333	2.93	1.30804414075136	3.54575805408601e-07	0.00050779454258523	--	XP_020165721.1 uncharacterized protein LOC109751239 isoform X1 [Aegilops tauschii subsp. tauschii] [Aegilops tauschii]
TraesCS6B02G012100	81	43	65	114	208	221	2.14	1.18	2.06	3.15	5.89	6.28	1.79333333333333	5.10666666666667	1.50973821936834	3.78429938043755e-07	0.000534918089436628	CPN60B1	VAI52497.1 unnamed protein product [Triticum turgidum subsp. durum] [Triticum turgidum]
TraesCS2D02G448300	25	46	35	123	100	93	0.67	1.28	1.13	3.45	2.87	2.68	1.02666666666667	3	1.54699465052213	3.87434074137162e-07	0.000536980986625298	--	SPT19862.1 unnamed protein product [Triticum aestivum]
TraesCS2B02G587500	151	149	110	52	34	65	4.55	4.69	3.99	1.64	1.11	2.12	4.41	1.62333333333333	-1.44182	3.89756598555678e-07	0.000536980986625298	--	VAH54280.1 unnamed protein product [Triticum turgidum subsp. durum] [Triticum turgidum]
TraesCS6A02G287300LC	0	0	0	25	19	18	0	0	0	0.66	0.51	0.49	0.001	0.553333333333333	9.11200502551313	4.07678024552064e-07	0.00055465104837839	--	-
TraesCS1B02G415800	129	126	149	234	287	333	1.58	1.62	2.2	3.01	3.8	4.41	1.8	3.74	1.05504136355796	5.05940994349492e-07	0.000668089234721039	UBC24	VAH22672.1 unnamed protein product [Triticum turgidum subsp. durum] [Triticum turgidum]
TraesCS2B02G617000	0	0	0	21	20	19	0	0	0	0.98	0.95	0.92	0.001	0.95	9.89178370321831	5.09471674110365e-07	0.000668089234721039	RABC1	XP_020181650.1 ras-related protein RABC1 [Aegilops tauschii subsp. tauschii] [Aegilops tauschii]
TraesCS6B02G187600	38	64	55	14	7	9	2.28	4.02	3.98	0.88	0.45	0.58	3.42666666666667	0.636666666666667	-2.4282	6.25825299242382e-07	0.000810898230890954	TDX	KQJ84906.1 hypothetical protein BRADI_5g23620v3 [Brachypodium distachyon]
MSTRG.3541	23	27	10	114	69	53	0.7	0.85	0.36	3.64	2.26	1.76	0.636666666666667	2.55333333333333	2.00377175388921	6.43930893328468e-07	0.00082454214542075	--	-
TraesCS2B02G034200	242	271	199	118	132	102	7.32	8.56	8.45	3.76	4.76	3.04	8.11	3.85333333333333	-1.07359	6.77382758473543e-07	0.000857290893197895	At1g67720	VAH40217.1 unnamed protein product [Triticum turgidum subsp. durum] [Triticum turgidum]
TraesCS2A02G215700	0	0	0	26	23	11	0	0	0	1.38	1.25	0.6	0.001	1.07666666666667	10.0723559488601	7.17365270349583e-07	0.000897456935518608	UCC1	VAH29308.1 unnamed protein product [Triticum turgidum subsp. durum] [Triticum turgidum]
TraesCS6B02G062000LC	8	2	0	27	46	35	0.34	0.09	0	1.19	2.07	1.58	0.143333333333333	1.61333333333333	3.4925984825725	7.37352891245319e-07	0.000906480233201683	pol	XP_020178417.1 uncharacterized protein LOC109763948 [Aegilops tauschii subsp. tauschii] [Aegilops tauschii]
TraesCS7A02G295000LC	0	0	1	27	34	29	0	0	0.06	1.43	1.84	1.57	0.02	1.61333333333333	6.33390073655344	7.41234835723209e-07	0.000906480233201683	pol	XP_020158176.1 uncharacterized protein LOC109743495 [Aegilops tauschii subsp. tauschii] [Aegilops tauschii]
TraesCS6B02G012000	87	45	40	123	150	181	3.2	1.72	1.77	4.75	5.91	7.15	2.23	5.93666666666667	1.41260940046016	7.93797488732507e-07	0.000959974583012609	CPN60	VAI52493.1 unnamed protein product [Triticum turgidum subsp. durum] [Triticum turgidum]
TraesCS3D02G455000	36	42	21	3	2	4	1.28	1.6	0.92	0.11	0.08	0.15	1.26666666666667	0.113333333333333	-3.48239	8.05102309952508e-07	0.000962946599093857	FHA2	XP_020158824.1 FHA domain-containing protein FHA2-like isoform X1 [Aegilops tauschii subsp. tauschii] [Aegilops tauschii]
TraesCS2A02G558800	33	44	41	3	7	7	0.75	1.05	1.13	0.06	0.16	0.17	0.976666666666667	0.13	-2.90935	9.99023404042837e-07	0.00116233816134991	--	VAH55031.1 unnamed protein product [Triticum turgidum subsp. durum] [Triticum turgidum]
TraesCS2D02G008500	15	11	6	70	41	44	0.53	0.41	0.26	2.61	1.57	1.68	0.4	1.95333333333333	2.28786625881373	1.00384769679525e-06	0.00116233816134991	SOT5	SPT15496.1 unnamed protein product [Triticum aestivum]
TraesCS6B02G489600LC	0	0	0	26	11	20	0	0	0	2.81	1.22	2.22	0.001	2.08333333333333	11.0246779737157	1.08109279081634e-06	0.00123860232047622	--	KAE8791218.1 Aminoacyl tRNA synthetase complex-interacting multifunctional protein 1 [Hordeum vulgare]
TraesCS6B02G054700	98	105	73	39	31	20	2.9	3.24	2.6	1.21	0.99	0.64	2.91333333333333	0.946666666666667	-1.62174	1.136818454433e-06	0.00128887976457232	--	VAI53323.1 unnamed protein product [Triticum turgidum subsp. durum] [Triticum turgidum]
MSTRG.5437	1	0	0	30	24	30	0.07	0	0	2.2	1.8	2.26	0.0233333333333333	2.08666666666667	6.48266392487502	1.27635218228023e-06	0.00143215925640786	--	neural Wiskott-Aldrich syndrome protein-like [Triticum aestivum]
TraesCS7B02G004800	0	0	0	26	14	15	0	0	0	0.95	0.52	0.54	0.001	0.67	9.38801728534514	1.33364156166695e-06	0.00148117225727952	--	VAI70198.1 unnamed protein product [Triticum turgidum subsp. durum] [Triticum turgidum]
TraesCSU02G207500	20	27	14	76	66	63	0.39	0.54	0.33	1.54	1.37	1.3	0.42	1.40333333333333	1.74039649956648	1.45579076050019e-06	0.00158449722163602	NPF8.4	EMS47191.1 Peptide transporter PTR2 [Triticum urartu]
MSTRG.71725	3	5	2	26	33	34	0.14	0.24	0.11	1.23	1.61	1.66	0.163333333333333	1.5	3.19907134710183	1.49952804940556e-06	0.00161594190520149	--	zinc finger CCCH domain-containing protein 4-like isoform X1 [Triticum dicoccoides]
MSTRG.9480	0	0	0	15	22	15	0	0	0	1.14	1.72	1.18	0.001	1.34666666666667	10.395177076918	1.84866372436458e-06	0.00193471546561121	--	dynamin-3-like [Triticum aestivum]
TraesCS5B02G154200	98	39	42	173	150	144	5.06	2.1	2.6	9.32	8.27	7.97	3.25333333333333	8.52	1.38893478338411	1.93825300681978e-06	0.0020091561477645	RPS10	VAI30495.1 unnamed protein product [Triticum turgidum subsp. durum] [Triticum turgidum]
TraesCS7D02G227100LC	41	41	24	73	107	117	0.77	0.8	0.53	1.44	2.16	2.37	0.7	1.99	1.50734160359868	2.18769902132809e-06	0.00224633348283368	--	XP_020148537.1 uncharacterized protein LOC109733731 [Aegilops tauschii subsp. tauschii] [Aegilops tauschii]
TraesCS1B02G593000LC	0	0	0	21	17	13	0	0	0	0.23	0.19	0.14	0.001	0.186666666666667	7.54432051622381	2.2263843290169e-06	0.0022646906238741	TY3B-G	ADB85398.1 putative retrotransposon protein [Phyllostachys edulis]
TraesCS3D02G021700	1	0	3	33	30	18	0.03	0	0.1	1	0.93	0.56	0.0433333333333333	0.83	4.25956221392699	2.54414507061696e-06	0.00255615755734793	At1g80170	CCG48006.1 polygalacturonase, putative, expressed [Triticum aestivum]
TraesCS3A02G178100	13	39	17	40	136	119	0.53	1.7	0.82	1.71	6.02	5.3	1.01666666666667	4.34333333333333	2.09495593611788	2.55989171131213e-06	0.00255615755734793	--	EMS66472.1 hypothetical protein TRIUR3_06012 [Triticum urartu]
TraesCS1D02G034500	32	29	22	71	88	78	0.8	0.75	0.66	1.85	2.36	2.09	0.736666666666667	2.1	1.51130545899585	3.23227149341831e-06	0.00314110412156377	CYP71C4	XP_020188830.1 indole-2-monooxygenase-like [Aegilops tauschii subsp. tauschii] [Aegilops tauschii]
TraesCS5D02G002400LC	0	1	0	23	24	25	0	0.07	0	1.7	1.82	1.9	0.0233333333333333	1.80666666666667	6.27479411929627	3.9626337316132e-06	0.00379298253890725	--	XP_020171929.1 uncharacterized protein LOC109757518 [Aegilops tauschii subsp. tauschii] [Aegilops tauschii]
TraesCS3B02G362700	3	0	5	20	39	31	0.11	0	0.22	0.77	1.54	1.23	0.11	1.18	3.42321143072454	4.21901337727909e-06	0.00399305769562116	CTPA2	VAI35816.1 unnamed protein product [Triticum turgidum subsp. durum] [Triticum turgidum]
TraesCS4B02G005200	65	85	29	132	160	144	1.03	1.41	0.56	2.2	2.74	2.47	1	2.47	1.30451104180995	4.38527610204466e-06	0.00411463651916071	-	-
TraesCSU02G207700	89	144	175	312	344	259	2.95	4.98	6.97	10.83	12.25	9.24	4.96666666666667	10.7733333333333	1.11711486740227	4.60139822939671e-06	0.00428051952722878	SAG39	EMS66997.1 Ananain [Triticum urartu]
TraesCS7D02G683200LC	7	4	9	31	37	47	0.08	0.05	0.12	0.35	0.43	0.55	0.0833333333333333	0.443333333333333	2.41142624572646	5.19918756292543e-06	0.00475533423139804	CRK23	VAI93098.1 unnamed protein product [Triticum turgidum subsp. durum] [Triticum turgidum]
TraesCS7A02G531400LC	0	0	0	21	10	15	0	0	0	0.69	0.34	0.51	0.001	0.513333333333333	9.00375213486111	5.78209312299905e-06	0.0051584327672159	--	VAI35347.1 unnamed protein product [Triticum turgidum subsp. durum] [Triticum turgidum]
TraesCS6B02G396900LC	45	32	31	88	102	87	0.71	0.53	0.58	1.45	1.72	1.46	0.606666666666667	1.54333333333333	1.34707374306154	5.84899810238685e-06	0.00517569758099095	Os03g0733400	KAB8098581.1 hypothetical protein EE612_027915 [Oryza sativa]
MSTRG.62075	34	27	19	89	67	72	0.99	0.82	0.67	2.72	2.1	2.26	0.826666666666667	2.36	1.51340923969612	6.51890902916645e-06	0.00567619662114804	TCX4	protein tesmin/TSO1-like CXC 2 [Oryza brachyantha]
TraesCS5D02G033500LC	29	17	4	84	57	58	0.56	0.33	0.09	1.68	1.17	1.19	0.326666666666667	1.34666666666667	2.04350163863659	6.67271349224581e-06	0.00576400642229783	--	VAH00090.1 unnamed protein product [Triticum turgidum subsp. durum] [Triticum turgidum]
TraesCS2D02G505000LC	38	25	17	1	1	0	0.62	0.42	0.33	0.02	0.02	0	0.456666666666667	0.0133333333333333	-5.09803	7.04276223232508e-06	0.00603575814274405	TY3B-G	XP_020177949.1 uncharacterized protein LOC109763512 [Aegilops tauschii subsp. tauschii] [Aegilops tauschii]
TraesCS6A02G432000LC	29	54	25	8	5	3	0.94	1.84	0.98	0.27	0.18	0.1	1.25333333333333	0.183333333333333	-2.77323	7.38176342508864e-06	0.00623090866423709	--	XP_020189408.1 uncharacterized protein LOC109775064 [Aegilops tauschii subsp. tauschii] [Aegilops tauschii]
TraesCS7A02G039900LC	157	165	129	79	23	63	2.78	3.04	2.74	1.46	0.44	1.2	2.85333333333333	1.03333333333333	-1.46534	7.38496722454392e-06	0.00623090866423709	--	XP_020398206.1 uncharacterized protein LOC109939386 isoform X2 [Zea mays]
TraesCS3B02G110600	9	6	7	52	33	30	0.31	0.22	0.29	1.88	1.22	1.11	0.273333333333333	1.40333333333333	2.36012441844831	8.54433199185195e-06	0.00715364337173199	--	CDM81496.1 unnamed protein product [Triticum aestivum]
TraesCS3B02G143300LC	60	51	32	103	142	98	1.64	1.46	1.05	2.95	4.18	2.89	1.38333333333333	3.34	1.27169926696092	8.94234002414557e-06	0.00737343356490931	TY3B-G	ADB85398.1 putative retrotransposon protein [Phyllostachys edulis]
TraesCSU02G259100LC	23	11	11	95	42	45	0.45	0.22	0.27	1.93	0.86	0.95	0.313333333333333	1.24666666666667	1.99231	9.06346618428987e-06	0.00741711821777665	--	-
TraesCS2D02G571500	16	7	13	48	57	42	0.13	0.06	0.13	0.41	0.51	0.38	0.106666666666667	0.433333333333333	2.02236781302845	9.51713238641093e-06	0.00773025526917427	NRPB1	SPT20986.1 unnamed protein product [Triticum aestivum]
TraesCS4B02G167500	61	54	69	149	110	157	1.04	0.98	1.43	2.68	2.03	2.9	1.15	2.53666666666667	1.14130009183802	1.06323090775291e-05	0.00857108261629754	SUS4	VAI05835.1 unnamed protein product [Triticum turgidum subsp. durum] [Triticum turgidum]
TraesCS6B02G737000LC	31	27	15	3	1	0	1.59	1.45	0.91	0.16	0.06	0	1.31666666666667	0.0733333333333333	-4.16628	1.0709817401682e-05	0.00857108261629754	APC10	XP_020199123.1 anaphase-promoting complex subunit 10-like [Aegilops tauschii subsp. tauschii] [Aegilops tauschii]
TraesCSU02G185600LC	84	58	63	15	29	18	6.44	4.65	5.82	1.21	2.39	1.49	5.63666666666667	1.69666666666667	-1.73214	1.10406568330938e-05	0.00870779804616493	--	XP_020160144.1 basic proline-rich protein-like [Aegilops tauschii subsp. tauschii] [Aegilops tauschii]
TraesCS2B02G621200	31	28	40	7	5	4	0.54	0.5	0.84	0.13	0.1	0.08	0.626666666666667	0.103333333333333	-2.60039	1.12604231895644e-05	0.00881723539838403	--	VAH55031.1 unnamed protein product [Triticum turgidum subsp. durum] [Triticum turgidum]
TraesCS5A02G440500	28	21	21	1	3	1	1.1	0.86	0.99	0.04	0.13	0.04	0.983333333333333	0.07	-3.81225	1.37140206729208e-05	0.0105861540713573	BPM1	VAI23323.1 unnamed protein product [Triticum turgidum subsp. durum] [Triticum turgidum]
TraesCS5B02G319700	165	71	100	299	250	187	5.46	2.47	3.99	10.36	8.88	6.66	3.97333333333333	8.63333333333333	1.11956786211176	1.39506994438165e-05	0.0106930146349608	XIPI	VAI34971.1 unnamed protein product [Triticum turgidum subsp. durum] [Triticum turgidum]
TraesCS6B02G132100	52	40	42	8	16	5	1.46	1.17	1.41	0.24	0.49	0.16	1.34666666666667	0.296666666666667	-2.18248	1.47170061440121e-05	0.0112014941658771	--	VAI54936.1 unnamed protein product [Triticum turgidum subsp. durum] [Triticum turgidum]
MSTRG.51688	1	0	0	30	25	9	0.06	0	0	2.04	1.74	0.63	0.02	1.47	6.19967234483636	1.49560783644184e-05	0.0113044064254282	--	-
TraesCS6B02G097800	65	80	73	36	12	5	2.33	2.99	3.15	1.35	0.46	0.19	2.82333333333333	0.666666666666667	-2.08236	1.54641209226874e-05	0.0116077957610084	--	VAI54178.1 unnamed protein product [Triticum turgidum subsp. durum] [Triticum turgidum]
TraesCS6B02G112600	20	26	25	1	3	2	0.51	0.7	0.77	0.03	0.08	0.06	0.66	0.0566666666666667	-3.54189	1.55835659090659e-05	0.011617334911703	--	VAI54498.1 unnamed protein product [Triticum turgidum subsp. durum] [Triticum turgidum]
MSTRG.59848	0	0	0	17	17	7	0	0	0	1.38	1.42	0.58	0.001	1.12666666666667	10.1378450304484	1.57338356321187e-05	0.0116495673743907	--	uncharacterized protein LOC119305919 [Triticum dicoccoides]
TraesCS2B02G917400LC	9	2	8	27	39	43	0.2	0.03	0.2	0.61	0.88	0.97	0.143333333333333	0.82	2.51624975063715	1.65704159472237e-05	0.0121504794508246	CHR24	VAH55103.1 unnamed protein product [Triticum turgidum subsp. durum] [Triticum turgidum]
TraesCS2D02G034800LC	0	0	0	8	17	15	0	0	0	0.13	0.28	0.25	0.001	0.22	7.78135971352466	1.66336347348229e-05	0.0121504794508246	--	XP_020171097.1 uncharacterized protein LOC109756663 [Aegilops tauschii subsp. tauschii] [Aegilops tauschii]
MSTRG.35917	31	45	26	82	89	85	1.5	2.52	1.78	4.84	5.76	5.32	1.93333333333333	5.30666666666667	1.45671553052872	1.83470865951239e-05	0.0133127683473325	--	-
TraesCS2A02G489500	140	136	113	59	64	61	4.96	5.05	4.83	2.19	2.43	2.33	4.94666666666667	2.31666666666667	-1.09441	1.84947913711703e-05	0.013331070116752	WRKY70	BAK53494.1 WRKY45-like transcription factor [Triticum aestivum]
TraesCS2D02G263100	7	10	14	40	46	44	0.13	0.19	0.31	0.78	0.92	0.88	0.21	0.86	2.03394733192334	2.07219890242256e-05	0.0145901822557013	RPK2	SPT17990.1 unnamed protein product [Triticum aestivum]
TraesCS3B02G462000LC	1	0	0	13	22	23	0.04	0	0	0.49	0.85	0.89	0.0133333333333333	0.743333333333333	5.80089989992031	2.07778158013406e-05	0.0145901822557013	--	XP_023157287.1 protein binding protein isoform X1 [Zea mays]
TraesCS6A02G138110LC	2	0	2	26	17	21	0.05	0	0.05	0.59	0.4	0.5	0.0333333333333333	0.496666666666667	3.8972404255748	2.45707686189522e-05	0.0171429937644576	--	XP_020149841.1 uncharacterized protein LOC109735055 isoform X1 [Aegilops tauschii subsp. tauschii] [Aegilops tauschii]
MSTRG.91865	21	41	30	89	85	72	0.57	1.15	1.05	2.62	2.58	2.2	0.923333333333333	2.46666666666667	1.41763929446713	2.489170595504e-05	0.0172562940627548	CPS1	ent-copalyl diphosphate synthase [Triticum aestivum]
TraesCS1D02G256500	55	44	26	126	81	95	1.57	1.31	0.89	3.76	2.48	2.92	1.25666666666667	3.05333333333333	1.28078307482827	2.56799436314392e-05	0.0176148941804827	AATP1	XP_020181645.1 AAA-ATPase ASD, mitochondrial-like [Aegilops tauschii subsp. tauschii] [Aegilops tauschii]
MSTRG.67592	9	4	6	40	39	23	0.69	0.32	0.55	3.21	3.21	1.9	0.52	2.77333333333333	2.41503749927884	2.57326574976044e-05	0.0176148941804827	--	proline-rich receptor-like protein kinase PERK2 isoform X3 [Triticum aestivum]
TraesCS1B02G148600	78	188	93	244	245	260	3.43	8.59	4.89	11.17	11.52	12.25	5.63666666666667	11.6466666666667	1.04700294850678	2.60398045906533e-05	0.0177137398215706	--	VAH15499.1 unnamed protein product [Triticum turgidum subsp. durum] [Triticum turgidum]
TraesCS2A02G044700	72	94	67	20	35	28	1.13	1.55	1.29	0.32	0.59	0.47	1.32333333333333	0.46	-1.52447	2.67460914686331e-05	0.0180811884567546	FH18	VAH40768.1 unnamed protein product [Triticum turgidum subsp. durum] [Triticum turgidum]
MSTRG.2171	33	20	22	0	5	2	1.09	0.69	0.88	0	0.18	0.07	0.886666666666667	0.0833333333333333	-3.41143	2.87593513967292e-05	0.0190865644229964	--	probable serine/threonine-protein kinase PBL17 isoform X2 [Aegilops tauschii subsp. strangulata] [Aegilops tauschii]
TraesCS1B02G225900	83	54	65	128	170	129	3.53	2.4	3.33	5.72	7.79	5.92	3.08666666666667	6.47666666666667	1.06920180232511	2.92019508744427e-05	0.0192628456674255	EXPB2	VAH17994.1 unnamed protein product [Triticum turgidum subsp. durum] [Triticum turgidum]
MSTRG.70547	42	35	37	9	11	5	1.5	1.3	1.59	0.34	0.42	0.19	1.46333333333333	0.316666666666667	-2.20822	3.03146583750533e-05	0.019876371880718	--	synapsin-1-like isoform X2 [Triticum aestivum]
TraesCS6B02G122800	45	29	21	105	62	85	2.13	1.43	1.19	5.2	3.17	4.36	1.58333333333333	4.24333333333333	1.42223300068305	3.14053680133302e-05	0.0204682135325681	WHAB1.6	EMS50796.1 Chlorophyll a-b binding protein, chloroplastic [Triticum urartu]
TraesCS4A02G363800LC	29	34	18	58	79	80	0.45	0.55	0.33	0.95	1.32	1.33	0.443333333333333	1.2	1.43657066082849	3.73537769184161e-05	0.0239154260798667	FRS5	SPT19609.1 unnamed protein product [Triticum aestivum]
TraesCS5B02G149700LC	0	0	0	17	4	17	0	0	0	0.99	0.24	1.02	0.001	0.75	9.55074678538324	3.79891782908086e-05	0.024180000902631	--	XP_020195868.1 uncharacterized protein LOC109781683 [Aegilops tauschii subsp. tauschii] [Aegilops tauschii]
TraesCS2A02G168200	104	89	163	214	271	273	2.07	1.84	3.88	4.44	5.77	5.82	2.59666666666667	5.34333333333333	1.04107919209288	4.28492779291276e-05	0.0271148735993266	SS2	VAH27981.1 unnamed protein product [Triticum turgidum subsp. durum] [Triticum turgidum]
TraesCS7D02G149100LC	3	1	2	23	16	25	0.09	0.04	0.09	0.75	0.53	0.83	0.0733333333333333	0.703333333333333	3.26166757006989	4.51112792297355e-05	0.0282139294908515	FRS5	XP_020182565.1 protein FAR1-RELATED SEQUENCE 5-like [Aegilops tauschii subsp. tauschii] [Aegilops tauschii]
TraesCS1D02G002200	229	160	134	106	81	72	8.08	5.89	5.69	3.92	3.07	2.74	6.55333333333333	3.24333333333333	-1.01475	4.90715796006167e-05	0.0301751400865012	--	XP_020165031.1 uncharacterized protein LOC109750484 [Aegilops tauschii subsp. tauschii] [Aegilops tauschii]
MSTRG.74880	74	141	77	13	23	52	1.76	3.5	2.2	0.32	0.59	1.33	2.48666666666667	0.746666666666667	-1.73568	5.28295765971546e-05	0.0323035053169152	--	plant UBX domain-containing protein 8-like [Triticum aestivum]
TraesCS5A02G532800	53	57	57	14	22	18	1.53	1.72	1.98	0.42	0.68	0.56	1.74333333333333	0.553333333333333	-1.65563	5.76669782105712e-05	0.0350644222090323	--	VAI25547.1 unnamed protein product [Triticum turgidum subsp. durum] [Triticum turgidum]
TraesCS7A02G705700LC	46	38	47	71	131	114	2.51	2.09	3.03	3.94	7.54	6.43	2.54333333333333	5.97	1.23101037515143	5.92210512898665e-05	0.0358093246857798	--	EMS51535.1 hypothetical protein TRIUR3_15206 [Triticum urartu]
TraesCS3A02G487500	0	0	0	2	26	10	0	0	0	0.07	1.02	0.4	0.001	0.496666666666667	8.95613411462837	6.62443394115448e-05	0.0398348074358671	SCL3	VAH69123.1 unnamed protein product [Triticum turgidum subsp. durum] [Triticum turgidum]
TraesCS6D02G152410LC	26	26	18	3	4	2	0.8	0.83	0.67	0.1	0.13	0.07	0.766666666666667	0.1	-2.9386	7.20061242512615e-05	0.043061640492481	--	XP_020195511.1 uncharacterized protein LOC109781319 [Aegilops tauschii subsp. tauschii] [Aegilops tauschii]
TraesCS2A02G026000	4	1	1	25	16	21	0.16	0.04	0.05	1.04	0.68	0.9	0.0833333333333333	0.873333333333333	3.38956681176273	7.25425366698668e-05	0.0431453673971856	--	VAH24692.1 unnamed protein product [Triticum turgidum subsp. durum] [Triticum turgidum]
TraesCS5D02G025300	31	35	28	8	2	8	0.33	0.39	0.36	0.09	0.02	0.09	0.36	0.0666666666666667	-2.43296	8.04692963868537e-05	0.0473424793948191	SF3B1	XP_020167895.1 splicing factor 3B subunit 1-like [Aegilops tauschii subsp. tauschii] [Aegilops tauschii]

## Sheet: Sheet2
List of differentially expressed genes of 4 DAP embryo.
id	Fielder-4DAP-1_count	Fielder-4DAP-2_count	Fielder-4DAP-3_count	amiR-BBM-4DAP-1_count	amiR-BBM-4DAP-2_count	amiR-BBM-4DAP-3_count	Fielder-4DAP-1_fpkm	Fielder-4DAP-2_fpkm	Fielder-4DAP-3_fpkm	amiR-BBM-4DAP-1_fpkm	amiR-BBM-4DAP-2_fpkm	amiR-BBM-4DAP-3_fpkm	Fielder-4DAP_mean	amiR-BBM-4d_mean	log2(fc)	PValue	FDR	Symbol	Description
TraesCS2A02G565600	30	20	38	298	301	345	0.8	0.49	1	7.71	6.49	8.19	0.763333333333333	7.46333333333333	3.28943502475565	4.20874116143662e-38	4.63677013755472e-33	NPF5.10	SPT21023.1 unnamed protein product [Triticum aestivum]
TraesCS2A02G562400	35	56	43	336	317	306	1.33	1.97	1.6	12.25	9.63	10.23	1.63333333333333	10.7033333333333	2.7121690107232	1.96714275053589e-34	1.0836005841327e-29	AMI1	VAH39545.1 unnamed protein product [Triticum turgidum subsp. durum] [Triticum turgidum]
TraesCS3A02G178200	9	2	10	141	159	138	0.64	0.13	0.69	9.53	8.92	8.57	0.486666666666667	9.00666666666667	4.20998740044567	1.43640280238501e-24	5.27494989129188e-20	--	VAH59906.1 unnamed protein product [Triticum turgidum subsp. durum] [Triticum turgidum]
TraesCS2D02G566500	0	0	0	413	437	462	0	0	0	13.06	11.51	13.38	0.001	12.65	13.626849764469	1.58264513313653e-20	3.48720028635302e-16	OST1B	SPT20948.1 unnamed protein product [Triticum aestivum]
TraesCS5A02G648300LC	25	18	30	136	180	179	0.5	0.33	0.58	2.59	2.85	3.12	0.47	2.85333333333333	2.60191563400235	8.47995991614916e-19	1.55706197327025e-14	ZMYM1	XP_020169530.1 zinc finger MYM-type protein 1-like [Aegilops tauschii subsp. tauschii] [Aegilops tauschii]
MSTRG.57240	3	3	1	114	145	84	0.07	0.06	0.02	2.49	2.64	1.68	0.05	2.27	5.50462039240355	3.07447149927971e-18	4.83877892965207e-14	--	NHL domain-containing protein [Zea mays]
TraesCS6A02G186800	679	803	753	344	465	426	7.07	7.71	7.69	3.42	3.86	3.89	7.49	3.72333333333333	-1.00837	6.81980360850011e-18	9.39172204435572e-14	Os06g0701100	VAI45592.1 unnamed protein product [Triticum turgidum subsp. durum] [Triticum turgidum]
TraesCS5B02G130900LC	49	58	68	200	374	235	0.62	0.68	0.85	2.44	3.81	2.64	0.716666666666667	2.96333333333333	2.04784675924031	9.29888996135942e-18	1.13828745226996e-13	Tf2-12	ABA97970.1 retrotransposon protein, putative, unclassified, expressed [Oryza sativa Japonica Group]
TraesCS3D02G340800	54	131	102	314	548	370	4.94	11.08	9.11	27.47	40	29.69	8.37666666666667	32.3866666666667	1.95095181875521	2.43849508012576e-17	2.68649002977455e-13	At1g07660	XP_016507811.1 PREDICTED: uncharacterized protein LOC107825453 [Nicotiana tabacum]
TraesCS1B02G278400	85	104	86	12	14	9	1.88	2.1	1.86	0.26	0.24	0.17	1.94666666666667	0.223333333333333	-3.12374	4.62109566401356e-17	4.62823735731249e-13	Os05g0428100	VAH19456.1 unnamed protein product [Triticum turgidum subsp. durum] [Triticum turgidum]
TraesCS3A02G178100	17	35	24	117	199	160	0.85	1.61	1.18	5.61	7.95	7.02	1.21333333333333	6.86	2.49923262669528	1.33925373430353e-16	1.2295465325685e-12	--	EMS66472.1 hypothetical protein TRIUR3_06012 [Triticum urartu]
TraesCS7A02G184800	272	268	281	62	122	111	19.84	18.03	20.1	4.33	7.1	7.1	19.3233333333333	6.17666666666667	-1.64544	1.08170152410621e-15	7.94473712738542e-12	--	VAI72234.1 unnamed protein product [Triticum turgidum subsp. durum] [Triticum turgidum]
TraesCS2A02G565800	0	0	0	184	173	129	0	0	0	3	2.36	1.93	0.001	2.43	11.2467405984931	1.66327770526308e-15	1.14527065493021e-11	RGA5	XP_020184119.1 disease resistance protein RPM1-like, partial [Aegilops tauschii subsp. tauschii] [Aegilops tauschii]
TraesCS7D02G551200LC	114	94	99	18	24	8	2.87	2.17	2.43	0.44	0.47	0.17	2.49	0.36	-2.79008	6.82597813522843e-15	4.42363535975362e-11	--	XP_020173320.1 uncharacterized protein LOC109758871 [Aegilops tauschii subsp. tauschii] [Aegilops tauschii]
TraesCS7B02G030700LC	17	26	18	105	174	109	0.27	0.38	0.28	1.61	2.22	1.53	0.31	1.78666666666667	2.52693037934974	1.08840067347148e-14	6.66161678868628e-11	Tf2-12	ADB85398.1 putative retrotransposon protein [Phyllostachys edulis]
TraesCS7A02G269300	322	305	294	136	110	134	11.53	10.07	10.31	4.67	3.15	4.21	10.6366666666667	4.01	-1.40737	1.93011673039772e-14	1.11916294835746e-10	SDH	XP_020150689.1 sorbitol dehydrogenase [Aegilops tauschii subsp. tauschii] [Aegilops tauschii]
TraesCS3B02G424700	130	102	112	380	334	353	3.48	2.52	2.94	9.72	7.13	8.28	2.98	8.37666666666667	1.49106393469734	2.16860430993752e-14	1.19457568412909e-10	NPF8.1	VAH82599.1 unnamed protein product [Triticum turgidum subsp. durum] [Triticum turgidum]
TraesCS2D02G431110LC	85	76	58	2	12	1	2.87	2.36	1.92	0.06	0.32	0.03	2.38333333333333	0.136666666666667	-4.12425	4.06775413727086e-14	2.13402130144348e-10	--	SPT18889.1 unnamed protein product [Triticum aestivum]
TraesCS2B02G616300	45	53	44	139	211	216	1.53	1.64	1.47	4.52	5.7	6.43	1.54666666666667	5.55	1.84332546683105	1.49447926310018e-13	7.4839445643521e-10	OST1B	SPT20948.1 unnamed protein product [Triticum aestivum]
TraesCS5D02G080200	90	92	117	6	18	25	2.46	2.32	3.13	0.16	0.39	0.6	2.63666666666667	0.383333333333333	-2.78204	2.07377443990347e-13	9.93337956713761e-10	--	XP_020193664.1 uncharacterized protein LOC109779454 isoform X1 [Aegilops tauschii subsp. tauschii] [Aegilops tauschii]
TraesCS4A02G415600	16	23	31	120	120	156	0.51	0.68	0.97	3.66	3.05	4.38	0.72	3.69666666666667	2.36015614799824	2.79875098449215e-13	1.28474331650625e-09	At3g18200	VAH97763.1 unnamed protein product [Triticum turgidum subsp. durum] [Triticum turgidum]
TraesCS2D02G342600	35	16	20	129	151	126	0.7	0.39	0.45	2.81	2.46	2.46	0.513333333333333	2.57666666666667	2.32753806322995	3.10066499724605e-13	1.36640105098639e-09	--	SPT18827.1 unnamed protein product [Triticum aestivum]
TraesCS4B02G369720LC	97	143	100	26	30	8	3.86	5.26	3.89	1	0.94	0.29	4.33666666666667	0.743333333333333	-2.54451	3.97153945994265e-13	1.68286347039185e-09	--	VAI07271.1 unnamed protein product [Triticum turgidum subsp. durum] [Triticum turgidum]
TraesCSU02G295000LC	1	4	1	87	57	77	0.04	0.15	0.04	3.43	1.86	2.76	0.0766666666666667	2.68333333333333	5.12928301694496	5.30120544607585e-13	2.16308816294140e-09	--	XP_020176785.1 protein FAR1-RELATED SEQUENCE 5-like isoform X1 [Aegilops tauschii subsp. tauschii] [Aegilops tauschii]
TraesCS2D02G566400	0	0	0	78	124	77	0	0	0	1.59	2.1	1.44	0.001	1.71	10.7397806097733	6.79645512210653e-13	2.67416236000884e-09	SUVR4	XP_020160631.1 probable inactive histone-lysine N-methyltransferase SUVR1 [Aegilops tauschii subsp. tauschii] [Aegilops tauschii]
TraesCS6B02G430500	547	627	499	207	265	352	43.49	45.96	38.9	15.75	16.8	24.55	42.7833333333333	19.0333333333333	-1.16852	1.52846018665274e-12	5.61301529211775e-09	--	VAI63051.1 unnamed protein product [Triticum turgidum subsp. durum] [Triticum turgidum]
TraesCS3A02G421700	175	243	183	458	482	447	9.84	12.59	10.12	26.61	23.36	23.79	10.85	24.5866666666667	1.18018111237634	3.89910514718564e-12	1.38569165827562e-08	RABC1	KAE8776852.1 ras-related protein RABC1 [Hordeum vulgare]
TraesCS7A02G295100LC	0	7	1	42	92	76	0	0.26	0.04	1.63	2.98	2.71	0.1	2.44	4.60880924267552	6.61505137810495e-12	2.27743815726819e-08	TY3B-G	XP_023157287.1 protein binding protein isoform X1 [Zea mays]
TraesCS5B02G463100	155	280	146	515	505	536	8	13.33	7.39	25.44	20.79	24.27	9.57333333333333	23.5	1.29556750835047	9.9350162976082e-12	3.3167901379015e-08	WHAB1.6	VAI38500.1 unnamed protein product [Triticum turgidum subsp. durum] [Triticum turgidum]
TraesCS6B02G083200	115	108	91	29	28	31	4.72	4.1	3.67	1.13	0.9	1.13	4.16333333333333	1.05333333333333	-1.98278	2.31446242207362e-11	7.49953897176032e-08	--	VAI53899.1 unnamed protein product [Triticum turgidum subsp. durum] [Triticum turgidum]
TraesCS3D02G426700LC	12	62	30	545	518	448	0.88	4.13	2.12	37.61	29.79	28.37	2.37666666666667	31.9233333333333	3.74759982001062	3.45815262307621e-11	1.05829076245641e-07	--	TKW10628.1 hypothetical protein SEVIR_6G178300v2 [Setaria viridis]
MSTRG.16883	0	0	0	41	78	70	0	0	0	1.41	2.24	2.21	0.001	1.95333333333333	10.9317224485885	3.96076695541301e-11	1.17934512291311e-07	--	-
TraesCS5D02G049700LC	98	105	74	220	331	237	1.38	1.66	1.03	2.98	3.74	2.95	1.35666666666667	3.22333333333333	1.24848709521059	4.22725291925429e-11	1.22556961609012e-07	--	XP_020165721.1 uncharacterized protein LOC109751239 isoform X1 [Aegilops tauschii subsp. tauschii] [Aegilops tauschii]
TraesCS2B02G362300	124	141	118	32	30	53	2.87	3.01	2.68	0.7	0.55	1.07	2.85333333333333	0.773333333333333	-1.88349	4.44933434296157e-11	1.25687990913866e-07	--	VAH48907.1 unnamed protein product [Triticum turgidum subsp. durum] [Triticum turgidum]
TraesCS2A02G044600	200	208	223	98	89	49	15.3	14.67	16.72	7.17	5.43	3.29	15.5633333333333	5.29666666666667	-1.55499	4.67720352890355e-11	1.28821878194826e-07	--	XP_020148127.1 protein GOS9-like [Aegilops tauschii subsp. tauschii] [Aegilops tauschii]
TraesCS2D02G600100	434	367	392	227	178	184	19.28	15.03	17.06	9.65	6.31	7.17	17.1233333333333	7.71	-1.15116	6.0596232692769e-11	1.61444356799468e-07	TSJT1	ACV44213.1 WALI7 [Triticum aestivum]
MSTRG.54027	175	378	239	12	11	35	3.24	6.77	4.53	0.23	0.18	0.61	4.84666666666667	0.34	-3.83339	6.15472722662946e-11	1.61444356799468e-07	GPA1	guanine nucleotide-binding protein alpha-1 subunit-like isoform X1 [Triticum dicoccoides]
TraesCS3D02G342400	1	1	0	115	98	74	0.12	0.16	0	15.93	11.29	9.42	0.0933333333333333	12.2133333333333	7.03184886603934	6.84172946142497e-11	1.75291473201207e-07	H2B.10	XP_020154110.1 histone H2B.3-like [Aegilops tauschii subsp. tauschii] [Aegilops tauschii]
TraesCS3D02G385600	13	18	10	101	84	75	0.4	0.51	0.3	2.89	2.01	1.98	0.403333333333333	2.29333333333333	2.5074015174275	7.90987210735874e-11	1.98052411379026e-07	NPF8.1	XP_020195277.1 protein NRT1/ PTR FAMILY 8.1-like [Aegilops tauschii subsp. tauschii] [Aegilops tauschii]
TraesCS6D02G243800	104	78	125	267	317	297	2.86	1.98	3.37	7.04	6.96	7.19	2.73666666666667	7.06333333333333	1.36792946059436	8.71642767574172e-11	2.13397519341437e-07	CYP707A5	XP_020153894.1 abscisic acid 8'-hydroxylase 1 [Aegilops tauschii subsp. tauschii] [Aegilops tauschii]
TraesCS2D02G380300LC	0	0	0	62	63	43	0	0	0	2.8	2.37	1.78	0.001	2.31666666666667	11.1778347617771	1.03532429619179e-10	2.47960168937934e-07	--	-
TraesCS4A02G363800LC	28	50	22	107	184	139	0.53	0.86	0.4	1.93	2.77	2.29	0.596666666666667	2.33	1.96533286811118	1.45938821643971e-10	3.4208680809609e-07	FRS5	SPT19609.1 unnamed protein product [Triticum aestivum]
TraesCS7D02G683200LC	4	12	7	72	69	62	0.05	0.15	0.09	0.9	0.72	0.71	0.0966666666666667	0.776666666666667	3.00620514952671	1.53590033957562e-10	3.52521125856347e-07	CRK23	VAI93098.1 unnamed protein product [Triticum turgidum subsp. durum] [Triticum turgidum]
TraesCS2D02G034800LC	0	0	0	46	58	55	0	0	0	0.82	0.86	0.9	0.001	0.86	9.74819284958946	1.6014522788631e-10	3.6006530114765e-07	--	XP_020171097.1 uncharacterized protein LOC109756663 [Aegilops tauschii subsp. tauschii] [Aegilops tauschii]
TraesCS7B02G375300	120	105	103	262	280	280	4.47	3.61	3.76	9.34	8.31	9.16	3.94666666666667	8.93666666666667	1.17910213835361	6.01292180446353e-10	1.2739299907649e-06	PGK3	VAI92249.1 unnamed protein product [Triticum turgidum subsp. durum] [Triticum turgidum]
TraesCS3B02G487900	220	208	178	71	111	99	4.89	4.26	3.88	1.51	1.96	1.93	4.34333333333333	1.8	-1.27081	7.26235295369793e-10	1.50961023567717e-06	CDC48C	CDM86020.1 unnamed protein product [Triticum aestivum]
TraesCS2A02G067300	158	270	166	488	443	475	9.98	15.65	10.24	29.38	22.22	26.23	11.9566666666667	25.9433333333333	1.11754861182777	1.01656461876303e-09	2.07398007498376e-06	RBCS	XP_020168773.1 ribulose bisphosphate carboxylase small chain PW9, chloroplastic-like [Aegilops tauschii subsp. tauschii] [Aegilops tauschii]
TraesCS5B02G149710LC	0	0	0	45	40	44	0	0	0	2.7	2	2.42	0.001	2.37333333333333	11.2126990251326	1.19126493320447e-09	2.38621195802065e-06	--	XP_020165174.1 uncharacterized protein LOC109750623 [Aegilops tauschii subsp. tauschii] [Aegilops tauschii]
MSTRG.62075	18	26	16	96	115	75	0.64	0.85	0.56	3.26	3.25	2.34	0.683333333333333	2.95	2.11005354546491	1.3625380980552e-09	2.68055039754896e-06	TCX4	protein tesmin/TSO1-like CXC 2 [Oryza brachyantha]
TraesCS6B02G122800	57	129	56	226	247	311	3.28	6.91	3.16	12.6	11.4	16.01	4.45	13.3366666666667	1.58352088677069	1.5981387067388e-09	3.08889370739322e-06	WHAB1.6	EMS50796.1 Chlorophyll a-b binding protein, chloroplastic [Triticum urartu]
TraesCS7D02G087800	114	105	190	43	52	42	10.6	9.01	17.33	3.83	3.86	3.43	12.3133333333333	3.70666666666667	-1.73203	2.36630265737343e-09	4.49475109935915e-06	--	XP_020158648.1 early nodulin-93-like [Aegilops tauschii subsp. tauschii] [Aegilops tauschii]
TraesCS1D02G002200	150	175	154	69	88	63	6.44	6.92	6.49	2.84	3.02	2.37	6.61666666666667	2.74333333333333	-1.27017	3.94942063881222e-09	7.37470630132106e-06	--	XP_020165031.1 uncharacterized protein LOC109750484 [Aegilops tauschii subsp. tauschii] [Aegilops tauschii]
TraesCS7D02G227100LC	24	36	40	100	157	116	0.55	0.76	0.9	2.19	2.87	2.33	0.736666666666667	2.46333333333333	1.74152799475472	4.3802339060344e-09	8.03480957882548e-06	--	XP_020148537.1 uncharacterized protein LOC109733731 [Aegilops tauschii subsp. tauschii] [Aegilops tauschii]
TraesCS6B02G012000	83	53	79	183	211	270	3.69	2.19	3.46	7.83	7.53	10.58	3.11333333333333	8.64666666666667	1.47368402454204	4.54493830693411e-09	8.07606214959566e-06	CPN60	VAI52493.1 unnamed protein product [Triticum turgidum subsp. durum] [Triticum turgidum]
MSTRG.58814	0	0	0	32	47	34	0	0	0	1.76	2.15	1.71	0.001	1.87333333333333	10.8713919143871	4.70257968963989e-09	8.22354292710518e-06	--	uncharacterized protein LOC119341193 isoform X1 [Triticum dicoccoides]
TraesCS6D02G162900	115	56	70	252	227	289	5.02	2.25	2.99	10.53	7.9	11.04	3.42	9.82333333333333	1.52221632951695	7.65372563786868e-09	1.31751711488124e-05	MYB73	XP_020180953.1 transcription factor MYB44-like [Aegilops tauschii subsp. tauschii] [Aegilops tauschii]
TraesCS5B02G154200	65	47	54	156	176	163	4.07	2.71	3.31	9.34	8.8	8.95	3.36333333333333	9.03	1.42483421909566	8.3131636395027e-09	1.40736075441759e-05	RPS10	VAI30495.1 unnamed protein product [Triticum turgidum subsp. durum] [Triticum turgidum]
TraesCS7D02G295400	111	147	110	283	300	261	2.6	3.5	2.63	6.68	5.68	5.59	2.91	5.98333333333333	1.03993028508097	8.43113459122819e-09	1.40736075441759e-05	LHY	VAI75815.1 unnamed protein product [Triticum turgidum subsp. durum] [Triticum turgidum]
TraesCS6B02G062000LC	6	4	2	33	72	43	0.31	0.19	0.1	1.61	2.93	1.93	0.2	2.15666666666667	3.43073130638399	1.49465717005207e-08	2.42156441800937e-05	pol	XP_020178417.1 uncharacterized protein LOC109763948 [Aegilops tauschii subsp. tauschii] [Aegilops tauschii]
TraesCS2A02G564000	59	128	87	218	288	228	1.45	2.88	2.08	5.09	5.61	4.88	2.13666666666667	5.19333333333333	1.28129897144293	1.70411889997954e-08	2.720909843634e-05	Os03g0167500	VAH55020.1 unnamed protein product [Triticum turgidum subsp. durum] [Triticum turgidum]
TraesCS3A02G508100	119	124	141	35	71	48	5	4.8	5.77	1.4	2.38	1.76	5.19	1.84666666666667	-1.49081	1.79023032442778e-08	2.81756678346012e-05	--	EMS53643.1 hypothetical protein TRIUR3_33544 [Triticum urartu]
TraesCS3B02G335100	61	61	75	168	185	183	2.66	2.44	3.18	6.9	6.19	6.84	2.76	6.64333333333333	1.26723903733973	1.90340933072216e-08	2.95350149247409e-05	IPK	CDM81503.1 unnamed protein product [Triticum aestivum]
TraesCS1B02G170200	1	5	5	68	41	35	0.06	0.26	0.28	3.74	1.88	1.76	0.2	2.46	3.62058641045188	2.01961442748273e-08	3.09029057605239e-05	--	XP_020170474.1 ribonuclease 1-like [Aegilops tauschii subsp. tauschii] [Aegilops tauschii]
MSTRG.14567	2	4	6	54	58	31	0.09	0.17	0.27	2.37	2.12	1.24	0.176666666666667	1.91	3.4344708741937	2.09844741597245e-08	3.16693084681759e-05	--	Tryptophanyl-tRNA synthetase, cytoplasmic [Triticum urartu]
MSTRG.5437	0	0	0	28	35	32	0	0	0	2.28	2.38	2.39	0.001	2.35	11.1984450414524	2.16775630684865e-08	3.2273204368313e-05	--	neural Wiskott-Aldrich syndrome protein-like [Triticum aestivum]
TraesCS1A02G165400	4	5	3	50	39	46	0.18	0.2	0.13	2.1	1.36	1.77	0.17	1.74333333333333	3.35824179427544	2.30179946243992e-08	3.38118995702675e-05	TIP3-1	VAH04719.1 unnamed protein product [Triticum turgidum subsp. durum] [Triticum turgidum]
TraesCS5D02G416900	157	175	224	467	379	429	5.04	5.18	7.05	14.33	9.7	12.09	5.75666666666667	12.04	1.06452980995193	2.9037143198629e-08	4.2092395607802e-05	--	XP_020158223.1 uncharacterized protein LOC109743532 [Aegilops tauschii subsp. tauschii] [Aegilops tauschii]
TraesCS6B02G012100	90	52	73	164	226	249	2.89	1.54	2.28	5.04	5.8	7	2.23666666666667	5.94666666666667	1.41073094372012	3.10113838196669e-08	4.43704435767883e-05	CPN60B1	VAI52497.1 unnamed protein product [Triticum turgidum subsp. durum] [Triticum turgidum]
TraesCS6B02G061900LC	0	2	0	37	64	57	0	0.08	0	1.52	2.19	2.15	0.0266666666666667	1.95333333333333	6.19475685442224	3.35751836452723e-08	4.74227946435852e-05	--	XP_020178417.1 uncharacterized protein LOC109763948 [Aegilops tauschii subsp. tauschii] [Aegilops tauschii]
TraesCS6A02G354600	7	11	11	73	77	40	0.13	0.19	0.2	1.32	1.16	0.66	0.173333333333333	1.04666666666667	2.59418103075054	3.73608837519234e-08	5.21018805436633e-05	--	VAI50627.1 unnamed protein product [Triticum turgidum subsp. durum] [Triticum turgidum]
MSTRG.4137	35	44	37	5	4	6	2	2.32	2.07	0.27	0.18	0.3	2.13	0.25	-3.09085	3.9518798040856e-08	5.44223247520138e-05	--	ent-kaurenoic acid oxidase-like [Triticum dicoccoides]
TraesCS2A02G576100	137	219	88	278	448	508	14.42	21.2	9.08	27.99	37.58	46.9	14.9	37.49	1.33119349493857	4.04728818952139e-08	5.50481160295767e-05	Os03g0429000	VAH39300.1 unnamed protein product [Triticum turgidum subsp. durum] [Triticum turgidum]
TraesCS2D02G361700LC	96	103	72	175	297	220	1.36	1.34	0.99	2.37	3.35	2.73	1.23	2.81666666666667	1.19533052510915	4.9025859429348e-08	6.50744449798949e-05	--	XP_020165721.1 uncharacterized protein LOC109751239 isoform X1 [Aegilops tauschii subsp. tauschii] [Aegilops tauschii]
TraesCS7A02G118500LC	36	63	29	134	162	120	1.15	1.86	0.92	4.12	4.16	3.4	1.31	3.89333333333333	1.57143905662141	5.3835210340112e-08	7.06074419425017e-05	--	XP_025876852.1 uncharacterized protein LOC9270452 isoform X2 [Oryza sativa Japonica Group]
TraesCS2B02G182900	34	21	12	132	74	108	1.91	1.09	0.66	7.11	3.32	5.33	1.22	5.25333333333333	2.10635198117233	9.23540386900897e-08	0.000118309819098688	RNS1	VAH43523.1 unnamed protein product [Triticum turgidum subsp. durum] [Triticum turgidum]
TraesCS6D02G052300	85	96	61	23	33	24	2.76	2.87	1.94	0.71	0.85	0.68	2.52333333333333	0.746666666666667	-1.75679	1.01088048977243e-07	0.000127373710727188	At5g56820	VAI41974.1 unnamed protein product [Triticum turgidum subsp. durum] [Triticum turgidum]
TraesCS5A02G407000	111	103	116	246	241	276	5.04	4.29	5.15	10.69	8.74	11.01	4.82666666666667	10.1466666666667	1.07190675642034	1.01741731360557e-07	0.000127373710727188	--	VAI37218.1 unnamed protein product [Triticum turgidum subsp. durum] [Triticum turgidum]
TraesCS6B02G396900LC	29	28	38	82	135	115	0.54	0.51	0.71	1.5	2.06	1.92	0.586666666666667	1.82666666666667	1.63860046432323	1.0734983551603e-07	0.000132884622233719	Os03g0733400	KAB8098581.1 hypothetical protein EE612_027915 [Oryza sativa]
TraesCS2D02G448300	25	31	43	90	135	114	0.81	0.93	1.37	2.8	3.5	3.26	1.03666666666667	3.18666666666667	1.62009603785014	1.37421698203345e-07	0.000164562483598506	--	SPT19862.1 unnamed protein product [Triticum aestivum]
TraesCS6A02G432000LC	19	36	13	0	0	0	0.77	1.33	0.5	0	0	0	0.866666666666667	0.001	-9.75933	1.40895684159719e-07	0.000166908360471787	--	XP_020189408.1 uncharacterized protein LOC109775064 [Aegilops tauschii subsp. tauschii] [Aegilops tauschii]
TraesCSU02G171400LC	0	1	1	46	43	42	0	0.05	0.05	2.19	1.71	1.84	0.0333333333333333	1.91333333333333	5.84297883178832	1.45048730341283e-07	0.000168526073472497	FRS8	KAE8814743.1 Protein FAR1-RELATED SEQUENCE 5 [Hordeum vulgare]
TraesCS1A02G200400LC	14	31	21	0	0	0	0.9	1.84	1.33	0	0	0	1.35666666666667	0.001	-10.4059	1.45320658799012e-07	0.000168526073472497	--	KAE8810929.1 hypothetical protein D1007_12279 [Hordeum vulgare]
TraesCS7D02G180510LC	33	29	38	0	0	1	1.17	0.95	1.32	0	0	0.12	1.14666666666667	0.04	-4.8413	1.56086966014846e-07	0.000179126052560996	--	SPT18889.1 unnamed protein product [Triticum aestivum]
TraesCS6B02G801110LC	1	2	0	35	44	32	0.03	0.05	0	0.93	0.98	0.78	0.0266666666666667	0.896666666666667	5.07146236255662	1.91183198536503e-07	0.000217140752399655	--	SPT16228.1 unnamed protein product [Triticum aestivum]
TraesCS2D02G026900	87	110	94	200	272	196	2.86	3.33	3.03	6.29	7.13	5.65	3.07333333333333	6.35666666666667	1.04846618788342	2.04796830916467e-07	0.000229993186333176	At4g34880	SPT15647.1 unnamed protein product [Triticum aestivum]
TraesCS5B02G065000	0	0	3	29	53	33	0	0	0.16	1.52	2.31	1.58	0.0533333333333333	1.80333333333333	5.07948478382681	2.06674461713574e-07	0.000229993186333176	--	VAI27581.1 unnamed protein product [Triticum turgidum subsp. durum] [Triticum turgidum]
TraesCS1D02G115400	8	13	20	73	80	54	0.13	0.19	0.31	1.11	1.01	0.75	0.21	0.956666666666667	2.18762700317577	2.39085002948208e-07	0.00026000903878013	RGI3	XP_020147184.1 probable LRR receptor-like serine/threonine-protein kinase At4g26540 [Aegilops tauschii subsp. tauschii] [Aegilops tauschii]
TraesCS5B02G411900	72	76	117	256	205	237	2.58	2.49	4.08	8.72	5.81	7.4	3.05	7.31	1.26106216350219	2.40727257470939e-07	0.00026000903878013	--	VAI37218.1 unnamed protein product [Triticum turgidum subsp. durum] [Triticum turgidum]
TraesCS7B02G277700	52	71	73	22	17	19	2.1	2.66	2.88	0.85	0.55	0.68	2.54666666666667	0.693333333333333	-1.87699	2.97068951779664e-07	0.000317748411821025	SPX1	VAI90049.1 unnamed protein product [Triticum turgidum subsp. durum] [Triticum turgidum]
TraesCS4A02G029300LC	10	10	13	77	61	44	0.56	0.2	0.73	1.57	1.04	0.83	0.496666666666667	1.14666666666667	1.20709623423994	3.1390111516336e-07	0.000329357008167118	FRS3	KAE8814743.1 Protein FAR1-RELATED SEQUENCE 5 [Hordeum vulgare]
MSTRG.62204	68	75	78	146	231	173	2.09	2.35	2.01	4.4	5.14	4.68	2.15	4.74	1.1405503993088	3.46528319967281e-07	0.00036016061330939	--	auxin response factor 3-like [Triticum aestivum]
TraesCS3B02G275200	19	11	17	63	72	76	0.79	0.42	0.69	2.5	2.38	2.76	0.633333333333333	2.54666666666667	2.0075732197048	3.66223680438223e-07	0.000377073484802607	TAR4	CDM83618.1 unnamed protein product [Triticum aestivum]
TraesCS1A02G076900	47	54	47	130	140	129	1.98	2.09	1.94	5.21	4.71	4.79	2.00333333333333	4.90333333333333	1.29136035054365	4.31831185116793e-07	0.000440507793188121	--	VAH01857.1 unnamed protein product [Triticum turgidum subsp. durum] [Triticum turgidum]
TraesCS2B02G617000	0	0	0	23	25	19	0	0	0	1.15	1.07	0.91	0.001	1.04333333333333	10.0269844410988	4.9247761729776e-07	0.000497046166827166	RABC1	XP_020181650.1 ras-related protein RABC1 [Aegilops tauschii subsp. tauschii] [Aegilops tauschii]
TraesCS2A02G544700LC	0	0	0	28	30	12	0	0	0	1.87	1.4	0.73	0.001	1.33333333333333	10.3808217839409	4.96279189897325e-07	0.000497046166827166	pol	ABA97970.1 retrotransposon protein, putative, unclassified, expressed [Oryza sativa Japonica Group]
TraesCS5B02G510800	39	57	48	9	9	15	1.15	1.55	1.39	0.25	0.21	0.39	1.36333333333333	0.283333333333333	-2.26657	5.77326341457181e-07	0.000567844169663999	POB1	VAI39528.1 unnamed protein product [Triticum turgidum subsp. durum] [Triticum turgidum]
TraesCS6A02G094400	59	101	66	190	164	232	2.03	3.19	2.22	6.24	4.49	6.99	2.48	5.90666666666667	1.25200407744699	5.82430708650558e-07	0.000567844169663999	WHAB1.6	VAI43083.1 unnamed protein product [Triticum turgidum subsp. durum] [Triticum turgidum]
TraesCS6B02G489600LC	0	0	0	20	27	19	0	0	0	2.4	2.7	2.09	0.001	2.39666666666667	11.2268135546055	5.88912838851435e-07	0.000569127433826865	--	KAE8791218.1 Aminoacyl tRNA synthetase complex-interacting multifunctional protein 1 [Hordeum vulgare]
TraesCS3D02G520100	48	28	45	99	154	127	1.84	0.99	1.69	3.63	4.71	4.27	1.50666666666667	4.20333333333333	1.48017359791303	6.9440527475991e-07	0.000659505423450856	--	XP_020183025.1 uncharacterized protein LOC109768694 [Aegilops tauschii subsp. tauschii] [Aegilops tauschii]
MSTRG.5438	0	0	0	22	17	25	0	0	0	2.1	1.36	2.19	0.001	1.88333333333333	10.8790726514688	7.29528577904044e-07	0.000686941567758021	--	proline-rich receptor-like protein kinase PERK9 [Triticum dicoccoides]
TraesCS6A02G094300	34	52	25	116	93	164	2.05	2.89	1.48	6.68	4.46	8.66	2.14	6.6	1.62485522784467	7.95672820586672e-07	0.000736632560033896	WHAB1.6	VAI43101.1 unnamed protein product [Triticum turgidum subsp. durum] [Triticum turgidum]
TraesCS6A02G287300LC	0	0	0	21	28	15	0	0	0	0.62	0.68	0.4	0.001	0.566666666666667	9.14635653030391	8.54557899679087e-07	0.000778071436426818	--	-
TraesCS2D02G571500	34	34	20	69	97	184	0.34	0.31	0.19	0.67	0.78	1.63	0.28	1.02666666666667	1.87446911791615	9.10730496194474e-07	0.0008169204928937	NRPB1	SPT20986.1 unnamed protein product [Triticum aestivum]
TraesCS5A02G376700	113	139	130	15	83	29	2.98	3.38	3.38	0.38	1.74	0.68	3.24666666666667	0.933333333333333	-1.79849	9.12056100807162e-07	0.0008169204928937	STY13	VAI21557.1 unnamed protein product [Triticum turgidum subsp. durum] [Triticum turgidum]
MSTRG.70547	25	31	53	5	6	6	1.08	1.24	2.25	0.21	0.21	0.23	1.52333333333333	0.216666666666667	-2.81368	9.93910614585649e-07	0.000878870294040711	--	synapsin-1-like isoform X2 [Triticum aestivum]
TraesCS1A02G030600	118	127	121	62	64	53	9.64	9.59	9.68	4.82	4.18	3.77	9.63666666666667	4.25666666666667	-1.17881	1.005152555588e-06	0.000878870294040711	--	VAH00585.1 unnamed protein product [Triticum turgidum subsp. durum] [Triticum turgidum]
TraesCS1B02G093900	26	32	23	3	1	3	1.03	1.17	0.89	0.11	0.03	0.1	1.03	0.08	-3.6865	1.14344370263455e-06	0.00099191490330117	--	VAH13918.1 unnamed protein product [Triticum turgidum subsp. durum] [Triticum turgidum]
TraesCS6B02G201700	25	14	49	137	85	144	1.11	0.57	2.14	5.85	3.02	5.64	1.27333333333333	4.83666666666667	1.9254	1.15424045355709e-06	0.000993458365378001	MYB73	VAI56787.1 unnamed protein product [Triticum turgidum subsp. durum] [Triticum turgidum]
TraesCS6A02G138110LC	0	0	1	30	45	22	0	0	0.03	0.75	0.95	0.51	0.01	0.736666666666667	6.20294005867028	1.20353320632206e-06	0.00102785467705815	--	XP_020149841.1 uncharacterized protein LOC109735055 isoform X1 [Aegilops tauschii subsp. tauschii] [Aegilops tauschii]
TraesCS6B02G072300LC	26	43	29	96	102	103	1.03	1.59	1.13	3.74	3.31	3.65	1.25	3.56666666666667	1.51264829590527	1.28472242056062e-06	0.0010804417486501	KIAA1586	XP_025815385.1 zinc finger MYM-type protein 1-like [Panicum hallii]
TraesCS5D02G233000LC	0	0	0	11	11	45	0	0	0	0.28	0.23	1.08	0.001	0.53	9.04984854945056	1.41203477527596e-06	0.00117851417569812	--	BAT12280.1 Os11g0103050, partial [Oryza sativa Japonica Group]
TraesCS2A02G416300	106	186	174	425	367	268	11.62	18.81	18.69	44.56	32.08	25.8	16.3733333333333	34.1466666666667	1.06039669222729	1.74881123113664e-06	0.00141666568628179	At1g07660	XP_016507811.1 PREDICTED: uncharacterized protein LOC107825453 [Nicotiana tabacum]
TraesCS5A02G172100	373	208	372	161	139	189	13.35	6.87	13.06	5.52	3.97	5.94	11.0933333333333	5.14333333333333	-1.10892	1.96114372810177e-06	0.00156564640960125	GLU14	XP_020181816.1 endoglucanase 4-like [Aegilops tauschii subsp. tauschii] [Aegilops tauschii]
MSTRG.74880	100	156	92	34	51	64	2.89	4.16	2.61	0.94	1.18	1.62	3.22	1.24666666666667	-1.36898	2.19774653480615e-06	0.0017294695409971	--	plant UBX domain-containing protein 8-like [Triticum aestivum]
TraesCS6D02G519200LC	8	6	6	30	39	68	0.08	0.06	0.06	0.29	0.31	0.6	0.0666666666666667	0.4	2.58496250072116	2.2951573246018e-06	0.00179331547837858	--	VAI52118.1 unnamed protein product [Triticum turgidum subsp. durum] [Triticum turgidum]
MSTRG.2171	29	21	29	0	1	1	1.17	0.78	1.15	0	0.03	0.04	1.03333333333333	0.0233333333333333	-5.46877	2.36386290275751e-06	0.00182116626571185	--	probable serine/threonine-protein kinase PBL17 isoform X2 [Aegilops tauschii subsp. strangulata] [Aegilops tauschii]
TraesCS4D02G060400	67	51	53	116	159	173	2.45	1.68	2.14	4.36	4.68	5.45	2.09	4.83	1.20852024675489	2.49935584228726e-06	0.00191218078572769	SCPL18	VAI02080.1 unnamed protein product [Triticum turgidum subsp. durum] [Triticum turgidum]
MSTRG.16319	3	10	5	36	65	30	0.35	0.96	0.24	2.14	3.07	1.92	0.516666666666667	2.37666666666667	2.20163386116965	2.73970613461508e-06	0.00208160982655547	--	uncharacterized protein LOC123138472 [Triticum aestivum]
TraesCS7A02G295000LC	0	1	1	28	42	23	0	0.06	0.06	1.64	2.06	1.24	0.04	1.64666666666667	5.36340473086352	3.66763027427535e-06	0.00267688324886464	pol	XP_020158176.1 uncharacterized protein LOC109743495 [Aegilops tauschii subsp. tauschii] [Aegilops tauschii]
TraesCS1B02G567400LC	21	14	6	58	78	54	0.43	0.26	0.12	1.12	1.26	0.96	0.27	1.11333333333333	2.04385428958942	3.66896043004956e-06	0.00267688324886464	TY3B-G	ADB85398.1 putative retrotransposon protein [Phyllostachys edulis]
TraesCS2D02G505000LC	24	24	26	0	1	1	0.47	0.44	0.5	0	0.02	0.02	0.47	0.0133333333333333	-5.13955	3.90837786079187e-06	0.00283280255870685	TY3B-G	XP_020177949.1 uncharacterized protein LOC109763512 [Aegilops tauschii subsp. tauschii] [Aegilops tauschii]
TraesCS3B02G110600	7	6	4	57	47	22	0.29	0.25	0.16	2.29	1.57	0.81	0.233333333333333	1.55666666666667	2.7379957227647	3.9782815058659e-06	0.00286462270262252	--	CDM81496.1 unnamed protein product [Triticum aestivum]
TraesCS4B02G316400	85	68	34	155	176	176	3.25	2.35	1.31	5.61	5.43	5.76	2.30333333333333	5.6	1.28170361727787	4.31878443855736e-06	0.00306968052642493	At4g08300	VAI09997.1 unnamed protein product [Triticum turgidum subsp. durum] [Triticum turgidum]
TraesCS2B02G576600	54	64	54	15	20	23	0.99	1.08	0.97	0.26	0.29	0.37	1.01333333333333	0.306666666666667	-1.72437	4.55496957182931e-06	0.00321680126748997	CRK29	XP_020200095.1 uncharacterized protein LOC109785922 isoform X1 [Aegilops tauschii subsp. tauschii] [Aegilops tauschii]
TraesCS5D02G176800	298	126	226	92	110	110	10.62	4.14	7.9	3.14	3.13	3.44	7.55333333333333	3.23666666666667	-1.2226	5.11293711091578e-06	0.0035651410222126	GLU14	XP_020181816.1 endoglucanase 4-like [Aegilops tauschii subsp. tauschii] [Aegilops tauschii]
TraesCS5D02G284800	271	249	137	113	116	119	13.99	11.85	6.93	5.58	4.78	5.39	10.9233333333333	5.25	-1.05702	5.4027458227565e-06	0.00369702178442909	--	XP_020200053.1 uncharacterized protein LOC109785880 [Aegilops tauschii subsp. tauschii] [Aegilops tauschii]
MSTRG.8001	8	10	11	40	59	45	0.26	0.3	0.35	1.26	1.55	1.3	0.303333333333333	1.37	2.17519994348299	5.49191974098049e-06	0.00372959025497563	--	-
TraesCS5D02G002400LC	0	2	0	42	30	18	0	0.16	0	3.43	2.06	1.36	0.0533333333333333	2.28333333333333	5.41996017784789	5.88864621268337e-06	0.00395580581250809	--	XP_020171929.1 uncharacterized protein LOC109757518 [Aegilops tauschii subsp. tauschii] [Aegilops tauschii]
TraesCS5D02G025300	47	56	50	1	7	22	0.61	0.67	0.63	0.01	0.07	0.25	0.636666666666667	0.11	-2.53303	6.50689618227492e-06	0.00434463486303774	SF3B1	XP_020167895.1 splicing factor 3B subunit 1-like [Aegilops tauschii subsp. tauschii] [Aegilops tauschii]
TraesCS7D02G197100LC	0	0	0	14	14	21	0	0	0	0.22	0.18	0.3	0.001	0.233333333333333	7.86624861111117	6.78655921536934e-06	0.0045040676431159	FRS5	XP_020174630.1 protein FAR1-RELATED SEQUENCE 5-like [Aegilops tauschii subsp. tauschii] [Aegilops tauschii]
MSTRG.59848	1	0	0	25	34	17	0.09	0	0	2.26	2.56	1.41	0.03	2.07666666666667	6.11316335158169	7.06239309589642e-06	0.00465906495434077	--	uncharacterized protein LOC119305919 [Triticum dicoccoides]
TraesCS1A02G004400	14	28	13	60	60	93	0.69	1.28	0.63	2.85	2.37	4.05	0.866666666666667	3.09	1.83405771559708	7.3600479272263e-06	0.00482652666751501	SHH2	XP_020200923.1 protein SAWADEE HOMEODOMAIN HOMOLOG 2-like [Aegilops tauschii subsp. tauschii] [Aegilops tauschii]
TraesCS6A02G569100LC	19	31	23	2	2	4	0.93	1.4	1.11	0.09	0.08	0.17	1.14666666666667	0.113333333333333	-3.3388	8.07522391761418e-06	0.0052026164854009	TBP1	VAI50990.1 unnamed protein product [Triticum turgidum subsp. durum] [Triticum turgidum]
TraesCS6B02G307400	9	32	27	1	1	1	0.26	0.86	0.77	0.03	0.02	0.03	0.63	0.0266666666666667	-4.56224	9.23721820111356e-06	0.00581522473838104	TIF3B1	XP_020157594.1 eukaryotic translation initiation factor 3 subunit B-like [Aegilops tauschii subsp. tauschii] [Aegilops tauschii]
TraesCS7A02G431900LC	5	8	9	30	33	74	0.29	0.47	0.55	1.87	1.68	4.19	0.436666666666667	2.58	2.56276675460696	9.31110839864018e-06	0.0058284364333988	--	BAC99566.1 unknown protein [Oryza sativa Japonica Group]
TraesCS2B02G421900	62	53	73	107	204	169	0.95	0.75	1.09	1.57	2.48	2.27	0.93	2.10666666666667	1.17965943634792	9.47078834316397e-06	0.00586177950430547	--	VAH50440.1 unnamed protein product [Triticum turgidum subsp. durum] [Triticum turgidum]
TraesCS3D02G476400	134	143	161	96	70	49	7.45	7.34	8.82	5.14	3.11	2.42	7.87	3.55666666666667	-1.14584	9.92555070235489e-06	0.00610404517276583	LFG2	XP_020148300.1 BI1-like protein [Aegilops tauschii subsp. tauschii] [Aegilops tauschii]
TraesCS4B02G071600	10	10	4	46	47	37	0.71	0.64	0.23	2.64	2.34	1.94	0.526666666666667	2.30666666666667	2.13084747945962	1.0208726219842e-05	0.00621378656154693	--	VAI02372.1 unnamed protein product [Triticum turgidum subsp. durum] [Triticum turgidum]
TraesCS3B02G264800	86	152	91	47	60	51	3.73	6.07	3.87	1.95	2.07	1.94	4.55666666666667	1.98666666666667	-1.19763	1.28989488553039e-05	0.00772324562711318	At1g28600	CDM83549.1 unnamed protein product [Triticum aestivum]
TraesCS5D02G259300	23	9	7	0	0	0	0.67	0.25	0.2	0	0	0	0.373333333333333	0.001	-8.54432	1.44961432283276e-05	0.00844994761621617	PCMP-H43	VAI18637.1 unnamed protein product [Triticum turgidum subsp. durum] [Triticum turgidum]
TraesCS2B02G163600	0	0	0	16	4	29	0	0	0	0.5	0.11	0.83	0.001	0.48	8.90689059560852	1.48096375646738e-05	0.00858725142368478	GATL4	XP_020188742.1 probable galacturonosyltransferase-like 4 [Aegilops tauschii subsp. tauschii] [Aegilops tauschii]
TraesCS2D02G292000	74	75	81	32	32	37	3.41	3.19	3.65	1.44	1.2	1.5	3.41666666666667	1.38	-1.30792	1.54198732507069e-05	0.00889427976979255	CET2	XP_020159159.1 CEN-like protein 2 [Aegilops tauschii subsp. tauschii] [Aegilops tauschii]
TraesCS3D02G148200	8	21	11	76	63	37	0.3	0.73	0.4	2.73	1.88	1.22	0.476666666666667	1.94333333333333	2.0274807364221	1.63181418865287e-05	0.00926685408061273	BZIP02	XP_020191576.1 basic leucine zipper 2-like [Aegilops tauschii subsp. tauschii] [Aegilops tauschii]
TraesCS7B02G368000LC	0	7	8	41	43	28	0	0.39	0.48	2.37	2.07	1.52	0.29	1.98666666666667	2.77622502461344	1.72004004678103e-05	0.00971778522840342	--	BAT03886.1 Os08g0155550, partial [Oryza sativa Japonica Group]
TraesCS7D02G199400	7	22	10	57	62	47	0.39	1.12	0.54	3	2.72	2.27	0.683333333333333	2.66333333333333	1.96257159342253	1.75695742588906e-05	0.00987571426582642	WHAB1.6	XP_020174702.1 chlorophyll a-b binding protein of LHCII type 1-like [Aegilops tauschii subsp. tauschii] [Aegilops tauschii]
TraesCS6B02G055900	94	99	102	42	45	58	2.87	2.79	3.06	1.23	1.1	1.56	2.90666666666667	1.29666666666667	-1.16456	1.82936645159446e-05	0.0101788536349577	--	VAI53345.1 unnamed protein product [Triticum turgidum subsp. durum] [Triticum turgidum]
TraesCS4B02G369710LC	76	91	58	19	48	20	2.5	2.78	1.89	0.61	1.27	0.59	2.39	0.823333333333333	-1.53746	1.86275030247855e-05	0.0103125226544754	--	VAI07270.1 unnamed protein product [Triticum turgidum subsp. durum] [Triticum turgidum]
TraesCS4D02G340800	120	24	24	13	7	12	5.48	1	1.08	0.57	0.26	0.48	2.52	0.436666666666667	-2.52882	1.97288949053683e-05	0.0108135937896738	--	XP_020184597.1 uncharacterized protein LOC109770300 [Aegilops tauschii subsp. tauschii] [Aegilops tauschii]
TraesCS1D02G390400	15	14	7	56	29	92	1.64	1.41	0.75	5.85	2.53	8.83	1.26666666666667	5.73666666666667	2.17917577370925	2.10051081806488e-05	0.0113996688091728	--	EMS45802.1 hypothetical protein TRIUR3_30355 [Triticum urartu]
TraesCS7B02G090500	162	142	169	77	124	61	10.54	8.53	10.77	4.82	6.44	3.5	9.94666666666667	4.92	-1.01555	2.20161339745013e-05	0.0117833512181115	ILI5	XP_020168701.1 transcription factor ILI5-like [Aegilops tauschii subsp. tauschii] [Aegilops tauschii]
TraesCS6B02G298500	72	29	65	144	162	151	2.02	0.75	1.79	3.84	3.61	3.71	1.52	3.72	1.29123129766445	2.20329522640553e-05	0.0117833512181115	CYP707A5	ACB78189.1 ABA 8'-hydroxylase [Triticum aestivum]
TraesCS2D02G263100	13	5	6	31	65	38	0.3	0.11	0.14	0.68	1.17	0.74	0.183333333333333	0.863333333333333	2.2354485741619	2.36109964748416e-05	0.0125032285686599	RPK2	SPT17990.1 unnamed protein product [Triticum aestivum]
TraesCS3B02G448200	0	0	0	20	16	7	0	0	0	0.93	0.65	0.3	0.001	0.626666666666667	9.29155444584385	2.3719476907052e-05	0.0125032285686599	ABC4	VAH89588.1 unnamed protein product [Triticum turgidum subsp. durum] [Triticum turgidum]
TraesCS7A02G294900LC	3	4	5	18	52	28	0.13	0.16	0.21	0.75	1.82	1.08	0.166666666666667	1.21666666666667	2.86789646399266	2.51680639600448e-05	0.0130790830494252	--	XP_020158176.1 uncharacterized protein LOC109743495 [Aegilops tauschii subsp. tauschii] [Aegilops tauschii]
MSTRG.91865	22	35	16	63	68	115	0.75	1.06	0.52	2.03	1.89	3.53	0.776666666666667	2.48333333333333	1.67691047069524	2.56342997532572e-05	0.0131968729150297	CPS1	ent-copalyl diphosphate synthase [Triticum aestivum]
TraesCS2B02G448400	11	10	4	46	40	40	0.21	0.18	0.07	0.81	0.57	0.64	0.153333333333333	0.673333333333333	2.13464952669478	2.69754806908194e-05	0.0137587440171647	--	VAH51134.1 unnamed protein product [Triticum turgidum subsp. durum] [Triticum turgidum]
TraesCS3D02G021700	0	0	1	16	18	28	0	0	0.03	0.54	0.51	0.87	0.01	0.64	6	2.713279543678e-05	0.0137752077109219	At1g80170	CCG48006.1 polygalacturonase, putative, expressed [Triticum aestivum]
TraesCS5B02G085100	2	4	0	23	26	26	0.08	0.15	0	0.88	0.83	0.92	0.0766666666666667	0.876666666666667	3.51535703323529	2.7891770664603e-05	0.0139501621896146	--	VAI28189.1 unnamed protein product [Triticum turgidum subsp. durum] [Triticum turgidum]
MSTRG.9480	0	0	1	31	19	12	0	0	0.09	2.63	1.34	0.93	0.03	1.63333333333333	5.76671293756026	3.05527417409715e-05	0.0149599802560126	--	dynamin-3-like [Triticum aestivum]
TraesCS3A02G481300	94	136	121	68	69	49	6.91	9.21	8.72	4.78	4.04	3.16	8.28	3.99333333333333	-1.05204	3.22786475166152e-05	0.0157351265349801	LFG4	EMS68250.1 hypothetical protein TRIUR3_19365 [Triticum urartu]
TraesCS3B02G362700	2	7	1	17	39	35	0.09	0.29	0.04	0.73	1.39	1.37	0.14	1.16333333333333	3.05476580343089	3.30944324439813e-05	0.0160617340191781	CTPA2	VAI35816.1 unnamed protein product [Triticum turgidum subsp. durum] [Triticum turgidum]
TraesCS2D02G381100	45	33	28	79	100	116	1.32	0.89	0.81	2.22	2.34	2.99	1.00666666666667	2.51666666666667	1.32192809488736	3.36825920948592e-05	0.0162044155942823	BGLU16	SPT19210.1 unnamed protein product [Triticum aestivum]
TraesCS7A02G555400	18	31	16	71	65	72	0.66	1.05	0.58	2.49	1.9	2.32	0.763333333333333	2.23666666666667	1.55096516810324	3.67884233948161e-05	0.0176216548061169	--	VAI81870.1 unnamed protein product [Triticum turgidum subsp. durum] [Triticum turgidum]
TraesCS7D02G116200	0	4	0	36	37	106	0	0.07	0	0.67	0.57	1.81	0.0233333333333333	1.01666666666667	5.44531051039265	3.83423210286559e-05	0.0182864654014157	ABCC10	VAI82713.1 unnamed protein product [Triticum turgidum subsp. durum] [Triticum turgidum]
TraesCS6B02G346400LC	2	4	1	21	32	22	0.05	0.08	0.02	0.45	0.58	0.43	0.05	0.486666666666667	3.2829339632715	3.92372888242228e-05	0.0185526699989898	--	SPT17774.1 unnamed protein product [Triticum aestivum]
TraesCS5B02G130800LC	15	36	8	128	100	33	0.77	1.64	0.4	6.11	3.99	1.44	0.936666666666667	3.84666666666667	2.03800118842456	4.10083989127443e-05	0.0192250864179449	--	-
TraesCS5B02G457300	73	6	3	2	1	1	2.58	0.2	0.1	0.07	0.03	0.03	0.96	0.0433333333333333	-4.46949	4.2019905139159e-05	0.0195330504184859	CCR3	VAI38369.1 unnamed protein product [Triticum turgidum subsp. durum] [Triticum turgidum]
TraesCS5D02G428300LC	1	1	0	23	22	21	0.04	0.04	0	0.84	0.67	0.7	0.0266666666666667	0.736666666666667	4.78790255939143	4.40394968174411e-05	0.0202935352717673	--	VAH69933.1 unnamed protein product [Triticum turgidum subsp. durum] [Triticum turgidum]
TraesCS6B02G271910LC	46	59	35	18	15	13	2.5	3.11	1.97	0.97	0.65	0.61	2.52666666666667	0.743333333333333	-1.76515	4.43926840382675e-05	0.0202935352717673	--	VAI57792.1 unnamed protein product [Triticum turgidum subsp. durum] [Triticum turgidum]
MSTRG.67884	11	15	9	37	69	41	0.86	1.08	0.68	2.74	4.29	2.79	0.873333333333333	3.27333333333333	1.90615621277724	4.4764978620626e-05	0.0203791640274148	--	proline-rich receptor-like protein kinase PERK2 isoform X1 [Triticum aestivum]
MSTRG.35917	22	38	22	69	88	80	1.35	2.33	1.25	4.9	5.11	5.14	1.64333333333333	5.05	1.6196582419824	4.50382038293751e-05	0.0204191724933426	--	-
TraesCS1A02G113800	13	23	9	49	62	56	0.21	0.34	0.14	0.75	0.79	0.79	0.23	0.776666666666667	1.75566168787611	4.58949168473725e-05	0.0206377264860205	RGI3	XP_020147184.1 probable LRR receptor-like serine/threonine-protein kinase At4g26540 [Aegilops tauschii subsp. tauschii] [Aegilops tauschii]
TraesCS7B02G216700LC	74	73	61	22	41	29	1.47	1.33	1.17	0.41	0.65	0.51	1.32333333333333	0.523333333333333	-1.33837	4.69586500119366e-05	0.0209450788332593	RE1	VAI85912.1 unnamed protein product [Triticum turgidum subsp. durum] [Triticum turgidum]
TraesCS2D02G256900	107	157	103	196	222	451	12.5	16.87	11.8	21.92	20.69	46.21	13.7233333333333	29.6066666666667	1.10929112264585	4.86707819490353e-05	0.0216212098682468	--	XP_020155446.1 phytosulfokines 4-like isoform X1 [Aegilops tauschii subsp. tauschii] [Aegilops tauschii]
TraesCS6B02G234900	68	111	77	41	50	21	2.03	3.08	2.27	1.18	1.19	0.55	2.46	0.973333333333333	-1.33765	4.97171254858102e-05	0.0219973321878382	OSA15	VAI57579.1 unnamed protein product [Triticum turgidum subsp. durum] [Triticum turgidum]
TraesCSU02G290400LC	8	18	18	45	48	79	0.45	0.95	1.02	2.49	2.21	3.98	0.806666666666667	2.89333333333333	1.84268799516988	5.02968134316151e-05	0.0221647997430442	--	-
TraesCS7A02G379500	4	6	10	35	38	35	0.17	0.24	0.42	1.45	1.31	1.33	0.276666666666667	1.36333333333333	2.30091760159482	5.07001858083513e-05	0.0222535437071955	--	VAI78031.1 unnamed protein product [Triticum turgidum subsp. durum] [Triticum turgidum]
TraesCS5A02G532800	40	48	57	14	19	19	1.4	1.55	1.96	0.47	0.53	0.59	1.63666666666667	0.53	-1.6267	5.52191838456399e-05	0.0241408630328339	--	VAI25547.1 unnamed protein product [Triticum turgidum subsp. durum] [Triticum turgidum]
TraesCS6B02G637600LC	16	30	21	2	6	0	0.51	0.88	0.65	0.06	0.16	0	0.68	0.0733333333333333	-3.21299	5.54589508915405e-05	0.0241498522518617	FBL14	EMS54953.1 hypothetical protein TRIUR3_03409 [Triticum urartu]
TraesCS3B02G356400	143	28	33	19	16	17	11.34	2.05	2.57	1.44	1.01	1.18	5.32	1.21	-2.13642	5.60950579423145e-05	0.0243306792657669	--	CDM84535.1 unnamed protein product [Triticum aestivum]
TraesCSU02G196200	7	19	17	41	52	76	0.24	0.59	0.55	1.33	1.41	2.25	0.46	1.66333333333333	1.85437154855909	5.90408565134123e-05	0.0255079653415005	At1g54730	VAH25136.1 unnamed protein product [Triticum turgidum subsp. durum] [Triticum turgidum]
TraesCS4A02G319310LC	0	7	3	18	38	32	0	0.18	0.08	0.47	0.82	0.76	0.0866666666666667	0.683333333333333	2.97904038136435	5.99984352240573e-05	0.0258204203462281	--	XP_020154598.1 uncharacterized protein LOC109739949 [Aegilops tauschii subsp. tauschii] [Aegilops tauschii]
TraesCS7D02G195600	56	80	50	33	14	20	3.77	4.97	3.3	2.13	0.75	1.18	4.01333333333333	1.35333333333333	-1.56828	7.29725489959867e-05	0.0311604097786351	XTH1	XP_020193299.1 putative xyloglucan endotransglucosylase/hydrolase protein 1 [Aegilops tauschii subsp. tauschii] [Aegilops tauschii]
TraesCS6B02G031600	140	104	179	73	85	77	3.46	2.37	4.34	1.73	1.68	1.67	3.39	1.69333333333333	-1.00142	7.32877660155469e-05	0.0311741821696247	1-SST	VAI52856.1 unnamed protein product [Triticum turgidum subsp. durum] [Triticum turgidum]
TraesCS7A02G355300LC	22	28	20	6	4	1	1.14	1.31	1.01	0.28	0.17	0.05	1.15333333333333	0.166666666666667	-2.79077	7.39326258550296e-05	0.031283327517732	RE2	KAE8797215.1 polyprotein [Hordeum vulgare]
TraesCS7A02G182200LC	6	2	5	17	45	32	0.1	0.03	0.08	0.26	0.59	0.46	0.07	0.436666666666667	2.64110557875869	7.51954293425448e-05	0.0315178764662696	--	VAI70985.1 unnamed protein product [Triticum turgidum subsp. durum] [Triticum turgidum]
TraesCS4D02G058900LC	150	123	85	70	62	54	10	7.56	5.55	4.49	3.3	3.16	7.70333333333333	3.65	-1.07759	7.5240097219106e-05	0.0315178764662696	--	ACR36507.1 unknown [Zea mays]
TraesCS5A02G102900	4	3	3	24	28	25	0.19	0.13	0.14	1.09	1.06	1.04	0.153333333333333	1.06333333333333	2.79385065770786	7.97862129925262e-05	0.0329693301671279	HHP4	VAI14573.1 unnamed protein product [Triticum turgidum subsp. durum] [Triticum turgidum]
TraesCS6D02G035000LC	1	3	3	19	33	19	0.02	0.07	0.07	0.43	0.62	0.4	0.0533333333333333	0.483333333333333	3.17990909001493	8.23186744470638e-05	0.0334837333441815	--	EMS60536.1 hypothetical protein TRIUR3_31521 [Triticum urartu]
TraesCS5A02G400700	79	9	14	1	4	8	5.57	0.59	0.97	0.07	0.23	0.5	2.37666666666667	0.266666666666667	-3.15583	8.2364452539468e-05	0.0334837333441815	--	VAI37096.1 unnamed protein product [Triticum turgidum subsp. durum] [Triticum turgidum]
TraesCS4A02G116400	11	4	4	35	34	36	0.73	0.25	0.26	2.23	1.8	2.1	0.413333333333333	2.04333333333333	2.30554695330391	8.65265501499298e-05	0.0349180587180138	PR1	VAH90035.1 unnamed protein product [Triticum turgidum subsp. durum] [Triticum turgidum]
TraesCS5D02G535400	55	59	64	115	115	202	1.61	1.61	1.84	3.23	2.68	5.2	1.68666666666667	3.70333333333333	1.13464952669478	8.73623823652657e-05	0.0351266922086909	CYP71E1	XP_020150408.1 4-hydroxyphenylacetaldehyde oxime monooxygenase-like [Aegilops tauschii subsp. tauschii] [Aegilops tauschii]
TraesCS6B02G166000LC	17	23	17	60	63	56	1.36	1.73	1.36	4.72	4.14	4.04	1.48333333333333	4.3	1.53549382445686	8.81754966091659e-05	0.0353247071324793	--	XP_025815385.1 zinc finger MYM-type protein 1-like [Panicum hallii]
TraesCS6B02G396200	91	114	63	34	47	50	2.92	3.61	2.29	1.16	1.25	1.6	2.94	1.33666666666667	-1.13718	9.16889368184686e-05	0.0363649599268056	MON1	VAI62291.1 unnamed protein product [Triticum turgidum subsp. durum] [Triticum turgidum]
MSTRG.46075	0	0	0	7	6	24	0	0	0	0.51	0.37	1.62	0.001	0.833333333333333	9.70274987882829	9.27273063093601e-05	0.0366156535344165	--	-
TraesCS4D02G070400	5	3	3	24	36	21	0.16	0.09	0.1	0.78	0.97	0.62	0.116666666666667	0.79	2.75946023195329	9.4132413687017e-05	0.0370377429139238	ARI1	XP_020159024.1 probable E3 ubiquitin-protein ligase ARI1 [Aegilops tauschii subsp. tauschii] [Aegilops tauschii]
TraesCS3D02G061400	54	87	47	143	112	198	4.53	6.72	3.86	11.47	7.51	14.56	5.03666666666667	11.18	1.15037902839952	9.69908587106283e-05	0.038026629552135	--	XP_020183582.1 uncharacterized protein LOC109769241 [Aegilops tauschii subsp. tauschii] [Aegilops tauschii]
MSTRG.54537	14	10	9	41	50	41	0.79	0.52	0.5	2.21	2.25	2.03	0.603333333333333	2.16333333333333	1.84222878091593	9.81993409067689e-05	0.0383639056301373	--	-
TraesCS6B02G165900LC	31	30	14	50	101	84	2.45	2.16	1.08	3.8	6.34	5.8	1.89666666666667	5.31333333333333	1.48615107168389	0.000101597041867629	0.0394674925441765	--	XP_025825169.1 zinc finger MYM-type protein 1-like, partial [Panicum hallii]
TraesCS1A02G265600	36	21	39	11	8	4	2.98	1.6	3.16	0.87	0.53	0.29	2.58	0.563333333333333	-2.19531	0.000102098896025146	0.0394674925441765	--	VAH07639.1 unnamed protein product [Triticum turgidum subsp. durum] [Triticum turgidum]
TraesCS7A02G195800	91	8	17	5	5	8	3.93	0.32	0.72	0.21	0.17	0.3	1.65666666666667	0.226666666666667	-2.86964	0.000103449553170399	0.0398416394161338	2MMP	VAI72535.1 unnamed protein product [Triticum turgidum subsp. durum] [Triticum turgidum]
TraesCS7D02G212900	31	28	29	9	9	3	1.46	1.22	1.34	0.41	0.34	0.12	1.34	0.29	-2.20811	0.000106865285196901	0.0408796821879952	PER11	XP_020151834.1 peroxidase 11 [Aegilops tauschii subsp. tauschii] [Aegilops tauschii]
TraesCS6B02G094100	22	13	14	1	0	2	1.73	0.94	1.08	0.08	0	0.14	1.25	0.0733333333333333	-4.09132	0.000108759173381847	0.041460201146983	FBL13	VAI54103.1 unnamed protein product [Triticum turgidum subsp. durum] [Triticum turgidum]
TraesCS7D02G119900	4	1	5	34	25	20	0.13	0.03	0.15	1.02	0.62	0.55	0.103333333333333	0.73	2.8205907492143	0.000114341348767687	0.0428468924957008	NPF2.3	XP_020182564.1 protein NRT1/ PTR FAMILY 2.3-like [Aegilops tauschii subsp. tauschii] [Aegilops tauschii]
TraesCS7B02G183900	85	108	88	45	58	51	3.5	4.08	3.56	1.79	1.91	1.83	3.71333333333333	1.84333333333333	-1.0104	0.000118037860914501	0.04408213944729	FUT11	XP_020179476.1 putative fucosyltransferase-like protein [Aegilops tauschii subsp. tauschii] [Aegilops tauschii]
TraesCS2A02G575900	0	0	0	8	8	18	0	0	0	0.72	0.6	1.48	0.001	0.933333333333333	9.86624861111117	0.00011927192480917	0.0443925268791429	At3g22845	VAH39303.1 unnamed protein product [Triticum turgidum subsp. durum] [Triticum turgidum]
TraesCS6D02G152410LC	12	27	16	1	3	2	0.45	0.93	0.59	0.04	0.09	0.07	0.656666666666667	0.0666666666666667	-3.30012	0.000121886997051054	0.0452130992091402	--	XP_020195511.1 uncharacterized protein LOC109781319 [Aegilops tauschii subsp. tauschii] [Aegilops tauschii]
TraesCS1B02G215500LC	14	9	7	34	61	35	0.69	0.41	0.34	1.59	2.38	1.5	0.48	1.82333333333333	1.92547202135024	0.000124507463611751	0.0460301586110958	--	XP_020175491.1 uncharacterized protein LOC109761108 [Aegilops tauschii subsp. tauschii] [Aegilops tauschii]
TraesCS7A02G400800	14	5	9	0	0	0	0.73	0.24	0.46	0	0	0	0.476666666666667	0.001	-8.89684	0.000129423544464793	0.0475286396456207	--	EMS45863.1 hypothetical protein TRIUR3_08093 [Triticum urartu]
TraesCS1B02G012000	30	44	37	83	104	86	0.3	0.4	0.36	0.79	0.82	0.75	0.353333333333333	0.786666666666667	1.15472259479864	0.000132310953098727	0.0481102811468743	RGA1	AGY30895.1 PM3-1B [Triticum aestivum]
MSTRG.51688	1	0	0	20	13	15	0.08	0	0	1.51	0.82	1.04	0.0266666666666667	1.12333333333333	5.39660478118185	0.000132317465621339	0.0481102811468743	--	-
TraesCS7B02G301200	60	29	17	4	13	8	1.25	0.56	0.35	0.08	0.22	0.15	0.72	0.15	-2.26303	0.000136025873307451	0.0492959554680324	LECRK3	VAI90651.1 unnamed protein product [Triticum turgidum subsp. durum] [Triticum turgidum]
TraesCS6D02G416700LC	2	8	21	0	0	0	0.32	1.26	3.43	0	0.02	0	1.67	0.00666666666666667	-7.96867	0.000136603668223442	0.0493430364858249	--	-

## Sheet: Sheet3
List of differentially expressed genes of 6 DAP embryo.
id	Fielder-6DAP-1_count	Fielder-6DAP-2_count	Fielder-6DAP-3_count	amiR-BBM-6DAP-1_count	amiR-BBM-6DAP-2_count	amiR-BBM-6DAP-3_count	Fielder-6DAP-1_fpkm	Fielder-6DAP-2_fpkm	Fielder-6DAP-3_fpkm	amiR-BBM-6DAP-1_fpkm	amiR-BBM-6DAP-2_fpkm	amiR-BBM-6DAP-3_fpkm	Fielder-6DAP_mean	amiR-BBM-6DAP_mean	log2(fc)	PValue	FDR	Symbol	Description
TraesCS2A02G565600	22	36	20	306	255	300	0.6	0.85	0.5	7.02	6.55	6.99	0.65	6.85333333333333	3.39829423544427	1.0340055260686e-38	1.175426461869e-33	NPF5.10	SPT21023.1 unnamed protein product [Triticum aestivum]
TraesCS1D02G122600	319	149	169	7	9	17	11.87	4.78	5.83	0.23	0.32	0.54	7.49333333333333	0.363333333333333	-4.36624	8.09843779488638e-25	4.60303056604649e-20	--	GER37128.1 cadherin-8 [Striga asiatica]
TraesCS2D02G566500	0	0	0	479	467	474	0	0	0	13.4	14.66	13.5	0.001	13.8533333333333	13.7579455330704	2.51701371194266e-21	9.53755225775019e-17	OST1B	SPT20948.1 unnamed protein product [Triticum aestivum]
TraesCS3D02G426700LC	83	100	45	439	326	425	5.98	6.24	3.01	26.87	22.4	26.43	5.07666666666667	25.2333333333333	2.3133773583858	7.89455085592776e-21	2.24357214412325e-16	--	TKW10628.1 hypothetical protein SEVIR_6G178300v2 [Setaria viridis]
TraesCS2A02G562400	86	46	51	424	269	311	3.29	1.5	1.8	13.69	9.74	10.22	2.19666666666667	11.2166666666667	2.35225613448963	1.24698402014023e-18	2.83506804914963e-14	AMI1	VAH39545.1 unnamed protein product [Triticum turgidum subsp. durum] [Triticum turgidum]
TraesCS3B02G894800LC	476	342	435	132	117	125	14.34	8.89	12.12	3.37	3.35	3.23	11.7833333333333	3.31666666666667	-1.82894	1.91350749707281e-17	3.62536319574576e-13	At3g55980	AFS49947.1 ZnFP [Triticum aestivum]
TraesCS4B02G369720LC	109	111	141	23	9	14	4.35	3.82	5.23	0.79	0.33	0.49	4.46666666666667	0.536666666666667	-3.0571	6.98331053080806e-17	1.13405970172953e-12	--	VAI07271.1 unnamed protein product [Triticum turgidum subsp. durum] [Triticum turgidum]
TraesCS7A02G251800	251	96	210	31	16	18	11.4	3.76	8.82	1.19	0.69	0.7	7.99333333333333	0.86	-3.21639	7.48002406986712e-16	1.06288337023786e-11	--	VAI74117.1 unnamed protein product [Triticum turgidum subsp. durum] [Triticum turgidum]
TraesCS6D02G519200LC	6	10	6	88	71	94	0.06	0.09	0.06	0.75	0.68	0.82	0.07	0.75	3.42146376843828	3.12946833307227e-15	3.95276190776285e-11	--	VAI52118.1 unnamed protein product [Triticum turgidum subsp. durum] [Triticum turgidum]
TraesCS5D02G271100	696	409	460	176	110	142	37.14	18.84	22.71	7.94	5.56	6.51	26.23	6.67	-1.97546	5.34722347917821e-15	6.07856323442541e-11	SAP1	XP_020197560.1 zinc finger A20 and AN1 domain-containing stress-associated protein 1 [Aegilops tauschii subsp. tauschii] [Aegilops tauschii]
TraesCS7B02G139300	382	133	297	56	20	33	22.27	6.69	16.02	2.76	1.1	1.65	14.9933333333333	1.83666666666667	-3.02916	9.87652618907653e-15	1.02066715235968e-10	--	VAI85989.1 unnamed protein product [Triticum turgidum subsp. durum] [Triticum turgidum]
TraesCS2D02G431110LC	57	90	78	2	4	1	1.95	2.62	2.44	0.06	0.13	0.03	2.33666666666667	0.0733333333333333	-4.99384	1.4855333304794e-14	1.40725810340755e-10	--	SPT18889.1 unnamed protein product [Triticum aestivum]
TraesCS7D02G116200	0	0	1	271	145	193	0	0	0.02	4.48	2.68	3.25	0.00666666666666667	3.47	9.02375435329942	5.15290822596694e-14	4.50590114156342e-10	ABCC10	VAI82713.1 unnamed protein product [Triticum turgidum subsp. durum] [Triticum turgidum]
TraesCS2A02G427700	468	218	325	90	70	75	22.89	9.21	14.71	3.72	3.24	3.15	15.6033333333333	3.37	-2.21103	6.84736053739008e-14	5.55991002720637e-10	ERF4	VAH35821.1 unnamed protein product [Triticum turgidum subsp. durum] [Triticum turgidum]
TraesCS4A02G363800LC	40	29	53	160	214	195	0.75	0.48	0.93	2.55	3.82	3.17	0.72	3.18	2.14295795384204	7.75251222146761e-14	5.58274328130417e-10	FRS5	SPT19609.1 unnamed protein product [Triticum aestivum]
TraesCS7A02G295100LC	4	4	0	74	60	79	0.16	0.14	0	2.55	2.32	2.77	0.1	2.54666666666667	4.67053823242723	7.85769262919207e-14	5.58274328130417e-10	TY3B-G	XP_023157287.1 protein binding protein isoform X1 [Zea mays]
TraesCS3D02G340800	218	250	182	680	436	859	19.99	19.81	15.44	52.73	37.88	67.77	18.4133333333333	52.7933333333333	1.51960494074329	5.62688399891617e-13	3.76263113143996e-09	At1g07660	XP_016507811.1 PREDICTED: uncharacterized protein LOC107825453 [Nicotiana tabacum]
TraesCS1B02G453400	206	332	159	799	660	679	5.34	7.43	3.81	17.48	16.19	15.11	5.52666666666667	16.26	1.55684575130043	7.36307461311746e-13	4.65006795997418e-09	SBT1.6	VAH23416.1 unnamed protein product [Triticum turgidum subsp. durum] [Triticum turgidum]
TraesCS3D02G041500	178	111	143	31	33	27	10.8	5.81	8	1.59	1.89	1.41	8.20333333333333	1.63	-2.33134	8.44828387240783e-13	5.05460824086161e-09	CML16	XP_020182372.1 probable calcium-binding protein CML16 [Aegilops tauschii subsp. tauschii] [Aegilops tauschii]
TraesCS3A02G209100	314	176	277	61	67	75	11.87	5.72	9.67	1.93	2.39	2.43	9.08666666666667	2.25	-2.01383	1.46954995402136e-12	8.20435310511606e-09	--	VAH61281.1 unnamed protein product [Triticum turgidum subsp. durum] [Triticum turgidum]
TraesCS2D02G425700	469	256	380	131	67	103	25.24	11.89	18.92	5.95	3.41	4.76	18.6833333333333	4.70666666666667	-1.98897	1.51562246723117e-12	8.20435310511606e-09	ERF3	XP_020184692.1 ethylene-responsive transcription factor 4-like [Aegilops tauschii subsp. tauschii] [Aegilops tauschii]
TraesCS2D02G566400	0	0	0	94	62	77	0	0	0	1.69	1.25	1.41	0.001	1.45	10.5018371849023	1.77968982463687e-12	9.19590000887477e-09	SUVR4	XP_020160631.1 probable inactive histone-lysine N-methyltransferase SUVR1 [Aegilops tauschii subsp. tauschii] [Aegilops tauschii]
TraesCS2A02G156800	477	200	385	94	60	96	31.31	11.31	23.41	5.43	3.7	5.37	22.01	4.83333333333333	-2.18707	1.96336162181574e-12	9.70387213404991e-09	MPSR1	VAH27709.1 unnamed protein product [Triticum turgidum subsp. durum] [Triticum turgidum]
TraesCS2A02G542700	239	119	109	31	26	23	10.61	4.57	4.47	1.14	1.09	0.88	6.55	1.03666666666667	-2.65954	3.56902514698805e-12	1.690483631809e-08	ERF3	VAH38483.1 unnamed protein product [Triticum turgidum subsp. durum] [Triticum turgidum]
TraesCS3D02G321500	303	160	214	69	40	57	16.13	7.35	10.54	3.1	2.02	2.61	11.34	2.57666666666667	-2.13784	3.87426369948429e-12	1.7616586982651e-08	ERF9	XP_020155336.1 ethylene-responsive transcription factor 4-like [Aegilops tauschii subsp. tauschii] [Aegilops tauschii]
TraesCSU02G121000	65	66	48	353	191	182	6.85	6.07	4.73	31.49	19.08	16.55	5.88333333333333	22.3733333333333	1.92707453228128	5.20918433362335e-12	2.27755556728193e-08	At1g07660	XP_016507811.1 PREDICTED: uncharacterized protein LOC107825453 [Nicotiana tabacum]
TraesCS5B02G262900	689	372	478	182	151	164	33.52	15.62	21.51	7.47	6.95	6.85	23.55	7.09	-1.73187	5.82309059606278e-12	2.45167210995788e-08	SAP1	VAI33814.1 unnamed protein product [Triticum turgidum subsp. durum] [Triticum turgidum]
TraesCS3D02G348200	12	19	8	158	83	68	1.09	1.52	0.72	12.36	7.24	5.37	1.11	8.32333333333333	2.90660173885695	1.22637916419401e-11	4.97896800886007e-08	At1g07660	XP_016507811.1 PREDICTED: uncharacterized protein LOC107825453 [Nicotiana tabacum]
MSTRG.16883	0	0	0	65	55	58	0	0	0	1.98	1.88	1.8	0.001	1.88666666666667	10.8816238369981	2.37261737943007e-11	9.30041468418869e-08	--	-
TraesCS5A02G648300LC	25	46	33	121	195	148	0.5	0.8	0.61	2.03	3.67	2.53	0.636666666666667	2.74333333333333	2.10731979238587	2.74774307009682e-11	1.04118396326465e-07	ZMYM1	XP_020169530.1 zinc finger MYM-type protein 1-like [Aegilops tauschii subsp. tauschii] [Aegilops tauschii]
TraesCS2D02G162600	448	234	315	124	70	95	31.76	14.32	20.65	7.42	4.7	5.78	22.2433333333333	5.96666666666667	-1.89838	3.65563278713629e-11	1.34052054304288e-07	MPSR1	XP_020192313.1 E3 ubiquitin-protein ligase RDUF1-like [Aegilops tauschii subsp. tauschii] [Aegilops tauschii]
TraesCS2B02G448100	263	139	170	49	43	54	13.22	6.04	7.9	2.08	2.05	2.33	9.05333333333333	2.15333333333333	-2.07188	4.38302893388496e-11	1.55702993786638e-07	ERF3	VAH51116.1 unnamed protein product [Triticum turgidum subsp. durum] [Triticum turgidum]
TraesCS2A02G565800	0	1	0	72	111	112	0	0.01	0	1.04	1.8	1.65	0.00333333333333333	1.49666666666667	8.81057163474115	4.86983538012401e-11	1.67754023183744e-07	RGA5	XP_020184119.1 disease resistance protein RPM1-like, partial [Aegilops tauschii subsp. tauschii] [Aegilops tauschii]
TraesCS2B02G182300	516	233	404	126	67	121	33.05	12.88	23.93	6.81	4.06	6.66	23.2866666666667	5.84333333333333	-1.99464	6.50138061174612e-11	2.17369836412195e-07	MPSR1	XP_020192313.1 E3 ubiquitin-protein ligase RDUF1-like [Aegilops tauschii subsp. tauschii] [Aegilops tauschii]
TraesCS3A02G328000	314	164	263	83	65	65	16.3	7.35	12.63	3.64	3.19	2.9	12.0933333333333	3.24333333333333	-1.89866	7.77673344239043e-11	2.52581636437319e-07	ERF4	ABC65860.1 ethylene-responsive factor-like transcription factor ERFL1c [Triticum aestivum]
TraesCS1A02G505500LC	27	96	53	0	0	0	1	3.06	1.81	0	0	0	1.95666666666667	0.001	-10.9342	8.0133357994378e-11	2.53036659353525e-07	--	-
TraesCS7D02G067400	98	42	44	5	5	3	9.96	3.68	4.14	0.43	0.48	0.26	5.92666666666667	0.39	-3.92567	1.68077812604326e-10	5.06188996160384e-07	--	XP_020174943.1 uncharacterized protein LOC109760545 [Aegilops tauschii subsp. tauschii] [Aegilops tauschii]
TraesCS6B02G062000LC	1	8	2	42	80	58	0.05	0.35	0.09	1.82	3.88	2.55	0.163333333333333	2.75	4.07354046501797	1.76048307475536e-10	5.13144703817858e-07	pol	XP_020178417.1 uncharacterized protein LOC109763948 [Aegilops tauschii subsp. tauschii] [Aegilops tauschii]
TraesCS3A02G325800	884	1080	744	2311	2030	1660	20.34	21.44	15.83	44.85	44.2	32.78	19.2033333333333	40.61	1.08047827016625	2.12469244027005e-10	6.03821656331447e-07	TF1	VAH64912.1 unnamed protein product [Triticum turgidum subsp. durum] [Triticum turgidum]
TraesCS3B02G542100LC	271	199	258	81	88	95	17.68	11.21	15.56	4.46	5.43	5.32	14.8166666666667	5.07	-1.54716	2.46761878651351e-10	6.69834375695739e-07	--	RWV80712.1 hypothetical protein GW17_00057966 [Ensete ventricosum]
TraesCS2D02G107100	221	80	184	45	17	20	5.07	1.58	3.9	0.87	0.37	0.39	3.51666666666667	0.543333333333333	-2.6943	2.48584976628488e-10	6.69834375695739e-07	CIPK29	SPT16348.1 unnamed protein product [Triticum aestivum]
TraesCS1B02G278400	85	95	114	21	20	29	1.87	1.81	2.32	0.39	0.41	0.55	2	0.45	-2.152	2.53374720963051e-10	6.69834375695739e-07	Os05g0428100	VAH19456.1 unnamed protein product [Triticum turgidum subsp. durum] [Triticum turgidum]
TraesCS2D02G543900	129	30	49	5	3	4	5.14	1.02	1.81	0.18	0.11	0.14	2.65666666666667	0.143333333333333	-4.21217	2.61775143708717e-10	6.76313932076724e-07	ERF3	XP_020148569.1 ethylene-responsive transcription factor 3-like [Aegilops tauschii subsp. tauschii] [Aegilops tauschii]
TraesCS7D02G683200LC	11	20	13	59	94	113	0.14	0.23	0.16	0.66	1.17	1.28	0.176666666666667	1.03666666666667	2.55285031556741	3.9431201082177e-10	9.96093476759697e-07	CRK23	VAI93098.1 unnamed protein product [Triticum turgidum subsp. durum] [Triticum turgidum]
TraesCS2A02G564000	85	84	112	284	198	256	2.09	1.78	2.53	5.87	4.59	5.39	2.13333333333333	5.28333333333333	1.30833903013941	6.80649992219304e-10	1.68204889490247e-06	Os03g0167500	VAH55020.1 unnamed protein product [Triticum turgidum subsp. durum] [Triticum turgidum]
TraesCS3B02G354900	400	491	397	1027	957	759	9.27	9.82	8.5	20.07	20.97	15.1	9.19666666666667	18.7133333333333	1.02488360715925	7.24474396962038e-10	1.75225693666923e-06	TF1	VAH83320.1 unnamed protein product [Triticum turgidum subsp. durum] [Triticum turgidum]
TraesCS3A02G421700	196	222	181	459	382	418	11.09	10.87	9.42	23.61	22.33	21.84	10.46	22.5933333333333	1.11101428451589	9.96990618428849e-10	2.36114380273201e-06	RABC1	KAE8776852.1 ras-related protein RABC1 [Hordeum vulgare]
TraesCS5B02G261300	107	50	80	14	8	16	7.38	2.98	5.1	0.81	0.52	0.95	5.15333333333333	0.76	-2.76143	1.55678821304342e-09	3.60591765184923e-06	--	XP_020171700.1 adenomatous polyposis coli protein 2-like [Aegilops tauschii subsp. tauschii] [Aegilops tauschii]
TraesCS5B02G154200	45	70	36	201	129	177	2.83	3.8	2.1	10.67	7.67	9.55	2.91	9.29666666666667	1.67569437539887	1.60734677285166e-09	3.60591765184923e-06	RPS10	VAI30495.1 unnamed protein product [Triticum turgidum subsp. durum] [Triticum turgidum]
TraesCS6A02G536300LC	197	69	156	36	25	21	11.3	3.42	8.28	1.74	1.36	1.03	7.66666666666667	1.37666666666667	-2.47742	1.61775733212797e-09	3.60591765184923e-06	HSP18.6	VAI50287.1 unnamed protein product [Triticum turgidum subsp. durum] [Triticum turgidum]
TraesCS5D02G481200	770	434	581	271	204	234	29.69	14.44	20.7	8.81	7.44	7.76	21.61	8.00333333333333	-1.43303	1.73351636486076e-09	3.78963345785147e-06	NAC002	ADE59447.1 NAC transcription factor 2D [Triticum aestivum]
TraesCS7D02G249800	119	22	95	5	4	10	9.95	1.59	7.35	0.35	0.32	0.72	6.29666666666667	0.463333333333333	-3.76447	1.8570472745108e-09	3.9830860948031e-06	--	XP_020201576.1 uncharacterized protein LOC109787434 [Aegilops tauschii subsp. tauschii] [Aegilops tauschii]
TraesCS6A02G305800	217	82	122	38	19	28	6.6	2.15	3.43	0.98	0.55	0.73	4.06	0.753333333333333	-2.43012	1.98811943081173e-09	4.18524912104418e-06	At3g28850	VAI49335.1 unnamed protein product [Triticum turgidum subsp. durum] [Triticum turgidum]
TraesCS7A02G354300	75	47	50	8	7	8	4.24	2.3	2.62	0.38	0.37	0.39	3.05333333333333	0.38	-3.00631	2.27619687482113e-09	4.58568358807893e-06	--	VAI77338.1 unnamed protein product [Triticum turgidum subsp. durum] [Triticum turgidum]
TraesCS2D02G380300LC	0	0	0	36	26	55	0	0	0	1.44	1.17	2.24	0.001	1.61666666666667	10.6588065312407	2.2993566378467e-09	4.58568358807893e-06	--	-
TraesCS6B02G072300LC	19	14	35	87	126	113	0.77	0.5	1.32	3	4.86	3.93	0.863333333333333	3.93	2.18653971529321	2.86126427106368e-09	5.607929974857e-06	KIAA1586	XP_025815385.1 zinc finger MYM-type protein 1-like [Panicum hallii]
TraesCS6A02G235100	89	36	58	2	10	3	2.65	0.93	1.6	0.05	0.28	0.08	1.72666666666667	0.136666666666667	-3.65926	3.13350562454112e-09	6.03741557425358e-06	ERF053	VAI47391.1 unnamed protein product [Triticum turgidum subsp. durum] [Triticum turgidum]
TraesCS2D02G034800LC	0	0	0	28	26	64	0	0	0	0.44	0.46	1.03	0.001	0.643333333333333	9.32942263143429	3.20649579943532e-09	6.07508038320681e-06	--	XP_020171097.1 uncharacterized protein LOC109756663 [Aegilops tauschii subsp. tauschii] [Aegilops tauschii]
TraesCS6A02G264300	64	44	71	0	0	2	3.3	1.96	3.36	0	0	0.11	2.87333333333333	0.0366666666666667	-6.29211	3.38169526196033e-09	6.30198315235843e-06	Os04g0590900	VAI48175.1 unnamed protein product [Triticum turgidum subsp. durum] [Triticum turgidum]
TraesCS3D02G264600	56	49	63	10	8	8	6.07	4.58	6.31	0.91	0.82	0.74	5.65333333333333	0.823333333333333	-2.77955	3.73788364833968e-09	6.85340966923079e-06	--	XP_020164127.1 uncharacterized protein LOC109749590 [Aegilops tauschii subsp. tauschii] [Aegilops tauschii]
TraesCS4B02G211700	87	42	93	14	6	14	6.31	2.63	6.24	0.83	0.41	0.87	5.06	0.703333333333333	-2.84686	4.52942382116428e-09	8.04517674560144e-06	HSP17.4	VAI07382.1 unnamed protein product [Triticum turgidum subsp. durum] [Triticum turgidum]
TraesCS1D02G030300	279	162	237	69	45	97	10.51	5.27	8.25	2.18	1.59	3.13	8.01	2.3	-1.80017	4.64069229505229e-09	8.11599966191784e-06	RHC2A	XP_020179053.1 E3 ubiquitin-protein ligase RDUF1-like [Aegilops tauschii subsp. tauschii] [Aegilops tauschii]
TraesCS7A02G369500	247	174	276	103	47	83	23.63	14.37	24.42	8.32	4.26	6.82	20.8066666666667	6.46666666666667	-1.68595	5.0317751195425e-09	8.66662273127625e-06	MBF1C	KAE8809816.1 multiprotein bridging factor 1 [Hordeum vulgare]
MSTRG.5437	0	0	0	37	28	37	0	0	0	2.66	2.26	2.73	0.001	2.55	11.3162815317462	5.63512025284518e-09	9.56094873108481e-06	--	neural Wiskott-Aldrich syndrome protein-like [Triticum aestivum]
TraesCS1D02G425600LC	89	51	46	11	8	8	4.26	2.1	2.06	0.46	0.38	0.34	2.80666666666667	0.393333333333333	-2.83503	7.10788138887095e-09	1.188239165651e-05	--	-
TraesCS3D02G319200	663	833	497	1810	1531	1216	15.33	16.62	10.62	35.3	33.49	24.13	14.19	30.9733333333333	1.1261520640271	7.47351101230962e-09	1.23125552369032e-05	TF1	XP_020164122.1 homeobox-leucine zipper protein TF1-like [Aegilops tauschii subsp. tauschii] [Aegilops tauschii]
TraesCS2D02G342600	33	51	23	124	106	169	0.67	0.9	0.5	2.27	2.3	3.24	0.69	2.60333333333333	1.91569178064265	8.67337521151329e-09	1.40663207060862e-05	--	SPT18827.1 unnamed protein product [Triticum aestivum]
TraesCS6B02G061900LC	0	2	0	64	54	47	0	0.07	0	2.33	2.21	1.74	0.0233333333333333	2.09333333333333	6.48726582683402	8.89869100548989e-09	1.40663207060862e-05	--	XP_020178417.1 uncharacterized protein LOC109763948 [Aegilops tauschii subsp. tauschii] [Aegilops tauschii]
TraesCS3D02G212000	200	111	150	45	42	53	7.55	3.64	5.26	1.44	1.51	1.71	5.48333333333333	1.55333333333333	-1.81969	8.90923485699135e-09	1.40663207060862e-05	--	XP_020174300.1 protein ANTAGONIST OF LIKE HETEROCHROMATIN PROTEIN 1-like [Aegilops tauschii subsp. tauschii] [Aegilops tauschii]
TraesCS1A02G116900	283	154	193	90	50	49	19.03	8.94	12.01	5.11	3.18	2.83	13.3266666666667	3.70666666666667	-1.84612	9.39295361684924e-09	1.46268875109941e-05	--	XP_020186167.1 uncharacterized protein LOC109771888 [Aegilops tauschii subsp. tauschii] [Aegilops tauschii]
TraesCS3B02G239400	337	184	254	70	84	106	10.27	4.85	7.16	1.8	2.42	2.77	7.42666666666667	2.33	-1.67238	1.00836664852765e-08	1.52961412100422e-05	--	VAH77117.1 unnamed protein product [Triticum turgidum subsp. durum] [Triticum turgidum]
TraesCS1B02G141100	200	59	123	32	11	24	5.64	1.43	3.22	0.77	0.29	0.58	3.43	0.546666666666667	-2.64948	1.01050329334955e-08	1.52961412100422e-05	--	KAE8783234.1 putative nuclease HARBI1 [Hordeum vulgare]
TraesCS2D02G099000	119	122	61	431	305	234	3.01	2.66	1.43	9.2	7.3	5.08	2.36666666666667	7.19333333333333	1.60380393509597	1.0226402279821e-08	1.52961412100422e-05	SBT1.6	XP_020183810.1 subtilisin-like protease SBT1.6 [Aegilops tauschii subsp. tauschii] [Aegilops tauschii]
TraesCS2A02G460800	154	158	168	57	46	77	15.42	13.65	15.56	4.82	4.36	6.62	14.8766666666667	5.26666666666667	-1.49809	1.11687106333496e-08	1.6488643099575e-05	--	VAH36616.1 unnamed protein product [Triticum turgidum subsp. durum] [Triticum turgidum]
TraesCS5D02G270400	106	47	57	8	11	13	6.56	2.51	3.26	0.42	0.64	0.69	4.11	0.583333333333333	-2.81675	1.15277978108521e-08	1.68005829710799e-05	--	XP_020171700.1 adenomatous polyposis coli protein 2-like [Aegilops tauschii subsp. tauschii] [Aegilops tauschii]
TraesCS5B02G261200	54	42	50	3	1	10	2.83	1.9	2.43	0.13	0.05	0.45	2.38666666666667	0.21	-3.50654	1.2097417282832e-08	1.74075709425379e-05	--	VAI33689.1 unnamed protein product [Triticum turgidum subsp. durum] [Triticum turgidum]
TraesCS5D02G080200	65	89	55	18	6	15	1.78	2.11	1.39	0.42	0.16	0.35	1.76	0.31	-2.50524	1.28895804942197e-08	1.83156105230177e-05	--	XP_020193664.1 uncharacterized protein LOC109779454 isoform X1 [Aegilops tauschii subsp. tauschii] [Aegilops tauschii]
TraesCS7D02G353800	205	165	231	86	60	90	16.19	11.25	16.89	5.76	4.49	6.12	14.7766666666667	5.45666666666667	-1.43723	1.42735810833906e-08	2.0031825639711e-05	MBF1C	XP_020198792.1 multiprotein-bridging factor 1c [Aegilops tauschii subsp. tauschii] [Aegilops tauschii]
TraesCS2A02G575900	0	0	0	37	25	30	0	0	0	2.94	2.23	2.43	0.001	2.53333333333333	11.3068212024972	1.53812663166405e-08	2.13231245253262e-05	At3g22845	VAH39303.1 unnamed protein product [Triticum turgidum subsp. durum] [Triticum turgidum]
TraesCS3D02G041400	97	39	64	12	4	12	5.71	1.98	3.5	0.6	0.22	0.6	3.73	0.473333333333333	-2.97825	1.61529845850036e-08	2.21231666104754e-05	CML16	BAJ86493.1 predicted protein, partial [Hordeum vulgare subsp. vulgare] [Hordeum vulgare]
TraesCSU02G295000LC	0	1	0	47	52	47	0	0.04	0	1.63	2.02	1.66	0.0133333333333333	1.77	7.05256805080416	1.83313243698908e-08	2.48077376237629e-05	--	XP_020176785.1 protein FAR1-RELATED SEQUENCE 5-like isoform X1 [Aegilops tauschii subsp. tauschii] [Aegilops tauschii]
TraesCS5D02G385900	133	33	62	13	9	5	4.69	1	2.02	0.39	0.3	0.15	2.57	0.28	-3.19827	2.4408019414444e-08	3.22631444532064e-05	PLP3	XP_020201003.1 patatin-like protein 3 [Aegilops tauschii subsp. tauschii] [Aegilops tauschii]
TraesCS5B02G379300	170	75	83	23	26	23	6.17	2.36	2.78	0.71	0.9	0.72	3.77	0.776666666666667	-2.2792	2.57391670102215e-08	3.36316240025396e-05	PLP3	VAI36322.1 unnamed protein product [Triticum turgidum subsp. durum] [Triticum turgidum]
TraesCS5B02G009000	141	117	150	37	34	62	11.44	8.2	11.26	2.53	2.61	4.32	10.3	3.15333333333333	-1.70769	2.8664193657348e-08	3.66119049706331e-05	CNR7	VAI26429.1 unnamed protein product [Triticum turgidum subsp. durum] [Triticum turgidum]
TraesCS6D02G052300	118	117	111	22	23	51	3.84	3.29	3.34	0.6	0.71	1.43	3.49	0.913333333333333	-1.93401	3.15024695367293e-08	3.93528157090854e-05	At5g56820	VAI41974.1 unnamed protein product [Triticum turgidum subsp. durum] [Triticum turgidum]
TraesCS5D02G300700	40	38	28	166	95	106	3.58	2.94	2.32	12.55	8.05	8.15	2.94666666666667	9.58333333333333	1.70144368132767	3.65605505514534e-08	4.51749315764953e-05	--	VAI34413.1 unnamed protein product [Triticum turgidum subsp. durum] [Triticum turgidum]
TraesCS5A02G263500	429	190	236	110	54	98	17.88	6.84	9.1	3.85	2.13	3.51	11.2733333333333	3.16333333333333	-1.8334	3.99159611504767e-08	4.8790609846266e-05	SAP1	VAI18941.1 unnamed protein product [Triticum turgidum subsp. durum] [Triticum turgidum]
TraesCS2D02G071300	15	4	4	77	58	47	1.47	0.36	0.36	6.22	5.26	3.88	0.73	5.12	2.81017544111998	4.22416524440311e-08	5.07336108862935e-05	RR42	XP_020158453.1 two-component response regulator ORR42-like [Aegilops tauschii subsp. tauschii] [Aegilops tauschii]
TraesCS5B02G480900	581	324	427	199	175	182	23.15	11.15	15.79	6.7	6.6	6.22	16.6966666666667	6.50666666666667	-1.35957	4.2404146014674e-08	5.07336108862935e-05	NAC002	ADE59446.1 NAC transcription factor 2B [Triticum aestivum]
TraesCS2D02G540300	128	54	91	18	22	18	8.62	3.12	5.62	1.02	1.4	1.05	5.78666666666667	1.15666666666667	-2.32276	4.284443330739e-08	5.07336108862935e-05	HIPP39	VAH53805.1 unnamed protein product [Triticum turgidum subsp. durum] [Triticum turgidum]
TraesCS1B02G593000LC	0	0	0	10	53	32	0	0	0	0.1	0.63	0.34	0.001	0.356666666666667	8.47843258056736	4.66748508783402e-08	5.4699556941207e-05	TY3B-G	ADB85398.1 putative retrotransposon protein [Phyllostachys edulis]
TraesCS3B02G068600	127	103	62	521	273	217	10.18	7.17	4.6	35.33	20.77	14.94	7.31666666666667	23.68	1.69441064192738	5.37227723501592e-08	6.23167713515209e-05	--	VAH72026.1 unnamed protein product [Triticum turgidum subsp. durum] [Triticum turgidum]
TraesCS3B02G492900	133	51	77	21	16	15	7.27	2.4	3.88	0.97	0.82	0.7	4.51666666666667	0.83	-2.44408	5.68582550218228e-08	6.52876349102601e-05	SRC2	VAH84309.1 unnamed protein product [Triticum turgidum subsp. durum] [Triticum turgidum]
TraesCS6B02G334000	201	82	135	43	24	42	6.86	2.42	4.26	1.24	0.78	1.23	4.51333333333333	1.08333333333333	-2.05872	5.82871563047737e-08	6.62590906725776e-05	At3g28850	VAI60753.1 unnamed protein product [Triticum turgidum subsp. durum] [Triticum turgidum]
TraesCS3A02G537700	305	196	302	71	104	119	10.23	5.68	9.37	2	3.29	3.43	8.42666666666667	2.90666666666667	-1.5356	6.05308378035222e-08	6.81283569207029e-05	At3g55980	VAH70456.1 unnamed protein product [Triticum turgidum subsp. durum] [Triticum turgidum]
TraesCS5D02G033500LC	21	20	17	102	87	58	0.49	0.39	0.37	2.01	1.92	1.16	0.416666666666667	1.69666666666667	2.02573756141361	6.24699275361739e-08	6.96215093385259e-05	--	VAH00090.1 unnamed protein product [Triticum turgidum subsp. durum] [Triticum turgidum]
TraesCS3D02G534300	26	33	48	120	103	116	0.89	0.97	1.5	3.4	3.3	3.35	1.12	3.35	1.58066236328753	7.02105743035282e-08	7.74886160689532e-05	At1g66300	VAH70237.1 unnamed protein product [Triticum turgidum subsp. durum] [Triticum turgidum]
TraesCS3D02G342400	24	19	7	107	61	84	3.55	2.39	0.98	13.09	8.39	10.4	2.30666666666667	10.6266666666667	2.20380768635375	7.46185395272875e-08	8.02611412855528e-05	H2B.10	XP_020154110.1 histone H2B.3-like [Aegilops tauschii subsp. tauschii] [Aegilops tauschii]
TraesCSU02G075000	85	19	27	0	2	2	5.95	1.15	1.75	0	0.13	0.12	2.95	0.0833333333333333	-5.14568	7.48408295105307e-08	8.02611412855528e-05	ZAT5	VAI39054.1 unnamed protein product [Triticum turgidum subsp. durum] [Triticum turgidum]
TraesCS3B02G130300	65	14	62	0	0	1	5.09	0.95	4.49	0	0	0.07	3.51	0.0233333333333333	-7.23293	7.58758937758725e-08	8.06106913715875e-05	HSP18	CDM81639.1 unnamed protein product [Triticum aestivum]
MSTRG.9480	0	0	0	24	22	30	0	0	0	1.8	1.85	2.29	0.001	1.98	10.951284714967	8.44116273488513e-08	8.88487089086608e-05	--	dynamin-3-like [Triticum aestivum]
TraesCS5D02G202400	1634	1120	1860	753	769	767	39.16	23.17	41.22	15.23	17.44	15.79	34.5166666666667	16.1533333333333	-1.09546	1.00848029353199e-07	0.000105175242502602	SBT1.7	XP_020194520.1 subtilisin-like protease SBT1.7 [Aegilops tauschii subsp. tauschii] [Aegilops tauschii]
TraesCS1B02G136800	199	77	116	44	26	28	17.16	5.73	9.24	3.2	2.12	2.07	10.71	2.46333333333333	-2.12027	1.03379780016435e-07	0.00010683548411753	--	XP_020186167.1 uncharacterized protein LOC109771888 [Aegilops tauschii subsp. tauschii] [Aegilops tauschii]
TraesCS3D02G114700	77	13	79	7	4	2	5.76	0.84	5.45	0.44	0.28	0.13	4.01666666666667	0.283333333333333	-3.82543	1.04446808935174e-07	0.000106965764858773	HSP18	XP_020154674.1 17.5 kDa class II heat shock protein-like [Aegilops tauschii subsp. tauschii] [Aegilops tauschii]
MSTRG.8001	17	14	14	69	65	62	0.56	0.4	0.43	1.92	2.03	1.76	0.463333333333333	1.90333333333333	2.03840586263933	1.06406738000676e-07	0.000107999988890204	--	-
MSTRG.12167	0	0	0	37	38	9	0	0	0	1.94	2.23	0.48	0.001	1.55	10.5980525001616	1.134173685011e-07	0.000113763175557423	--	zinc finger BED domain-containing protein RICESLEEPER 2-like [Oryza sativa Japonica Group]
TraesCS6B02G801110LC	1	0	4	33	32	40	0.03	0	0.1	0.78	0.85	0.96	0.0433333333333333	0.863333333333333	4.31636856954546	1.14086420415266e-07	0.000113763175557423	--	SPT16228.1 unnamed protein product [Triticum aestivum]
TraesCS6B02G227900	5	6	8	51	37	45	0.28	0.29	0.42	2.43	1.98	2.18	0.33	2.19666666666667	2.73477803492844	1.25367064963398e-07	0.000123924798642124	PNSL2	VAI57943.1 unnamed protein product [Triticum turgidum subsp. durum] [Triticum turgidum]
TraesCS6B02G266600	67	15	53	6	1	2	3.36	0.65	2.46	0.25	0.05	0.09	2.15666666666667	0.13	-4.05222	1.40728861686009e-07	0.000137910644912763	BRH1	VAI59503.1 unnamed protein product [Triticum turgidum subsp. durum] [Triticum turgidum]
TraesCS3A02G264500	192	72	106	37	18	34	13.01	4.21	6.65	2.12	1.15	1.98	7.95666666666667	1.75	-2.18481	1.44640488923588e-07	0.000140532451789459	--	VAH63148.1 unnamed protein product [Triticum turgidum subsp. durum] [Triticum turgidum]
TraesCS2D02G505000LC	23	41	61	7	1	3	0.46	0.7	1.12	0.12	0.02	0.05	0.76	0.0633333333333333	-3.58496	1.47403255157683e-07	0.000142003049462372	TY3B-G	XP_020177949.1 uncharacterized protein LOC109763512 [Aegilops tauschii subsp. tauschii] [Aegilops tauschii]
TraesCS5A02G429700	65	8	16	0	0	0	3.21	0.35	0.75	0	0	0	1.43666666666667	0.001	-10.4885	1.5527974002362e-07	0.000148333907619034	--	BAS86800.1 Os03g0792850, partial [Oryza sativa Japonica Group]
TraesCS7D02G199400	45	29	40	139	99	114	2.49	1.38	2.05	6.49	5.18	5.42	1.97333333333333	5.69666666666667	1.52948331604719	1.62263156959957e-07	0.000153713240781142	WHAB1.6	XP_020174702.1 chlorophyll a-b binding protein of LHCII type 1-like [Aegilops tauschii subsp. tauschii] [Aegilops tauschii]
TraesCS6D02G379200	151	51	80	21	20	18	6.82	1.99	3.34	0.8	0.86	0.7	4.05	0.786666666666667	-2.3641	1.69029742300673e-07	0.000158356928888955	--	XP_020176846.1 spidroin-1-like [Aegilops tauschii subsp. tauschii] [Aegilops tauschii]
TraesCSU02G259100LC	21	22	23	79	94	70	0.5	0.45	0.5	1.58	2.12	1.43	0.483333333333333	1.71	1.82290592559212	1.8075592444236e-07	0.000167055213193774	--	-
TraesCS6B02G406200	6	10	4	53	41	42	0.26	0.37	0.16	1.93	1.68	1.56	0.263333333333333	1.72333333333333	2.71023972213783	2.02509952791931e-07	0.000185650999222003	CAD5	XP_020189209.1 probable cinnamyl alcohol dehydrogenase 5 [Aegilops tauschii subsp. tauschii] [Aegilops tauschii]
TraesCS1B02G119600	67	18	30	3	2	2	2.81	0.66	1.17	0.12	0.1	0.07	1.54666666666667	0.0966666666666667	-4	2.06841972651917e-07	0.000188105399401216	CDKF-2	VAH14566.1 unnamed protein product [Triticum turgidum subsp. durum] [Triticum turgidum]
TraesCS7D02G270600	140	76	117	28	36	34	5.02	2.25	4.02	0.81	1.3	1.13	3.76333333333333	1.08	-1.80098	2.09236814098851e-07	0.000188773121558056	HSFB2B	XP_020197754.1 heat stress transcription factor B-2b-like [Aegilops tauschii subsp. tauschii] [Aegilops tauschii]
TraesCSU02G171400LC	0	1	0	35	39	34	0	0.04	0	1.46	1.82	1.44	0.0133333333333333	1.57333333333333	6.88264304936184	2.16352696705483e-07	0.000193656106325899	FRS8	KAE8814743.1 Protein FAR1-RELATED SEQUENCE 5 [Hordeum vulgare]
TraesCS6D02G136200	142	38	99	10	23	14	4.2	0.97	2.7	0.25	0.64	0.36	2.62333333333333	0.416666666666667	-2.65444	2.31466335006738e-07	0.000202949803800191	WRKY71	XP_020192814.1 WRKY transcription factor WRKY71-like [Aegilops tauschii subsp. tauschii] [Aegilops tauschii]
TraesCS2D02G162200	64	60	47	14	13	10	4.13	3.35	2.81	0.76	0.79	0.55	3.43	0.7	-2.29278	2.32091579598555e-07	0.000202949803800191	CML46	XP_020192311.1 probable calcium-binding protein CML45 [Aegilops tauschii subsp. tauschii] [Aegilops tauschii]
TraesCS3A02G508100	79	88	88	22	31	24	3.33	3.19	3.42	0.78	1.25	0.87	3.31333333333333	0.966666666666667	-1.77719	2.3972582512438e-07	0.000208025287195909	--	EMS53643.1 hypothetical protein TRIUR3_33544 [Triticum urartu]
TraesCS7A02G090210LC	14	23	18	67	69	76	0.12	0.15	0.13	0.64	0.73	0.6	0.133333333333333	0.656666666666667	2.30012372456902	2.4447556686607e-07	0.000209450601055507	TY3B-I	ABA97970.1 retrotransposon protein, putative, unclassified, expressed [Oryza sativa Japonica Group]
TraesCS2B02G116300	261	538	414	1017	637	1053	5.88	10.45	8.6	19.3	13.55	20.32	8.31	17.7233333333333	1.09272958359134	2.46014253095213e-07	0.000209450601055507	SBT1.6	VAH42001.1 unnamed protein product [Triticum turgidum subsp. durum] [Triticum turgidum]
TraesCS1A02G200400LC	17	28	21	0	0	0	1.1	1.57	1.26	0	0	0	1.31	0.001	-10.3554	2.46895858805545e-07	0.000209450601055507	--	KAE8810929.1 hypothetical protein D1007_12279 [Hordeum vulgare]
TraesCS4A02G319310LC	8	9	8	45	46	51	0.22	0.21	0.2	1.04	1.19	1.19	0.21	1.14	2.44057259138598	2.51596552802236e-07	0.000211857343206665	--	XP_020154598.1 uncharacterized protein LOC109739949 [Aegilops tauschii subsp. tauschii] [Aegilops tauschii]
TraesCS6D02G083500	126	27	45	10	2	10	6.52	1.21	2.15	0.44	0.1	0.44	3.29333333333333	0.326666666666667	-3.33366	2.56453514540345e-07	0.000214359310091197	--	XP_020174323.1 histone-lysine N-methyltransferase 2D-like [Aegilops tauschii subsp. tauschii] [Aegilops tauschii]
TraesCS3B02G264800	145	141	135	61	59	54	6.31	5.3	5.44	2.24	2.43	2.02	5.68333333333333	2.23	-1.34969	2.76898082441216e-07	0.00022809379215703	At1g28600	CDM83549.1 unnamed protein product [Triticum aestivum]
MSTRG.74880	96	113	113	38	40	41	2.79	2.83	3.04	0.93	1.1	1.02	2.88666666666667	1.01666666666667	-1.50556	2.86724800565498e-07	0.000234489317653843	--	plant UBX domain-containing protein 8-like [Triticum aestivum]
TraesCS7A02G295000LC	0	1	0	33	34	37	0	0.05	0	1.72	1.98	1.96	0.0166666666666667	1.88666666666667	6.82273014794452	2.89546079112595e-07	0.000235105211680589	pol	XP_020158176.1 uncharacterized protein LOC109743495 [Aegilops tauschii subsp. tauschii] [Aegilops tauschii]
TraesCS5B02G252600	465	241	326	176	80	131	27.65	12.38	17.94	8.86	4.51	6.67	19.3233333333333	6.68	-1.53242	3.02742498524209e-07	0.000244077014217989	XERICO	VAI33449.1 unnamed protein product [Triticum turgidum subsp. durum] [Triticum turgidum]
TraesCS5A02G468300	603	348	480	241	192	227	24.47	12.19	18.02	8.25	7.37	7.91	18.2266666666667	7.84333333333333	-1.21651	3.1046245616493e-07	0.000248538314291977	NAC002	AAU08786.1 NAC domain transcription factor [Triticum aestivum]
TraesCS4A02G029300LC	10	12	8	38	65	60	0.22	0.51	0.16	0.68	1.32	1.12	0.296666666666667	1.04	1.80966878789585	3.79449961823663e-07	0.000299546759098809	FRS3	KAE8814743.1 Protein FAR1-RELATED SEQUENCE 5 [Hordeum vulgare]
TraesCS2B02G121600	102	26	33	5	7	6	2.05	0.45	0.61	0.08	0.13	0.1	1.03666666666667	0.103333333333333	-3.32657	4.0378105421476e-07	0.000316555992413595	--	VAH42170.1 unnamed protein product [Triticum turgidum subsp. durum] [Triticum turgidum]
TraesCS1A02G314300	461	285	376	206	148	161	22.53	12.03	17	8.5	6.85	6.76	17.1866666666667	7.37	-1.22155	4.18082183650491e-07	0.000325522797197513	ERF4	ABC65857.1 ethylene-responsive factor-like transcription factor ERFL2c [Triticum aestivum]
TraesCS3A02G112900	59	12	41	0	2	3	4.24	0.74	2.72	0	0.14	0.18	2.56666666666667	0.106666666666667	-4.58871	4.25017611401799e-07	0.000328671612321921	HSP18	CDM81632.1 unnamed protein product [Triticum aestivum]
TraesCSU02G169600	0	0	0	19	19	25	0	0	0	0.6	0.67	0.79	0.001	0.686666666666667	9.42346612134942	4.38072560303788e-07	0.000336478205659823	rsca	XP_020153601.1 26 kDa endochitinase 1-like [Aegilops tauschii subsp. tauschii] [Aegilops tauschii]
TraesCS3D02G066800LC	1	4	3	31	42	27	0.02	0.08	0.07	0.61	0.93	0.54	0.0566666666666667	0.693333333333333	3.61297687689075	4.55465048441008e-07	0.000347489263836433	pol	XP_020163288.1 uncharacterized protein LOC109748674 [Aegilops tauschii subsp. tauschii] [Aegilops tauschii]
TraesCS5A02G262800	115	25	43	10	8	4	5.5	1.03	1.9	0.4	0.36	0.16	2.81	0.306666666666667	-3.19583	4.79989566869664e-07	0.000363758493286952	--	XP_020171700.1 adenomatous polyposis coli protein 2-like [Aegilops tauschii subsp. tauschii] [Aegilops tauschii]
TraesCS1B02G376600	0	1	0	9	47	64	0	0.1	0	0.89	5.2	6.44	0.0333333333333333	4.17666666666667	6.9692426044345	4.8570202527459e-07	0.000365649994219467	At1g07660	XP_016507811.1 PREDICTED: uncharacterized protein LOC107825453 [Nicotiana tabacum]
MSTRG.5438	0	0	0	21	14	28	0	0	0	1.78	1.33	2.42	0.001	1.84333333333333	10.8481012644009	5.47131578659658e-07	0.000406511610897346	--	proline-rich receptor-like protein kinase PERK9 [Triticum dicoccoides]
TraesCS1B02G130700	44	54	47	136	122	115	2.93	3.11	2.9	7.65	7.7	6.58	2.98	7.31	1.29455907549028	5.66113436586162e-07	0.000417883617732501	--	VAH14940.1 unnamed protein product [Triticum turgidum subsp. durum] [Triticum turgidum]
TraesCS2D02G381100	47	59	31	121	130	136	1.38	1.5	0.84	3.01	3.63	3.44	1.24	3.36	1.43812111239189	6.20918605547548e-07	0.000452462591813004	BGLU16	SPT19210.1 unnamed protein product [Triticum aestivum]
TraesCS5A02G216400	549	316	510	252	170	206	20.55	10.21	17.66	7.96	6.02	6.62	16.14	6.86666666666667	-1.23296	6.26263371213924e-07	0.000453450581206912	FLZ17	XP_020165881.1 uncharacterized protein LOC109751400 [Aegilops tauschii subsp. tauschii] [Aegilops tauschii]
MSTRG.58814	1	0	0	37	33	25	0.06	0	0	1.8	1.8	1.24	0.02	1.61333333333333	6.33390073655344	6.39828882146977e-07	0.000460340682505202	--	uncharacterized protein LOC119341193 isoform X1 [Triticum dicoccoides]
TraesCS1A02G029800	173	99	142	65	37	29	5.89	2.92	4.48	1.89	1.2	0.86	4.43	1.31666666666667	-1.75042	6.66005248123971e-07	0.000476160242710621	RHC2A	XP_020179053.1 E3 ubiquitin-protein ligase RDUF1-like [Aegilops tauschii subsp. tauschii] [Aegilops tauschii]
TraesCS7B02G259000	97	56	105	31	17	24	12.51	6.25	12.49	3.34	2.07	2.65	10.4166666666667	2.68666666666667	-1.955	7.38193740479089e-07	0.000524472811477759	MBF1C	ACU43593.1 multiprotein bridging factor 1 [Triticum aestivum]
TraesCS6B02G374100	74	25	47	7	7	8	4.63	1.35	2.72	0.37	0.41	0.43	2.9	0.403333333333333	-2.84601	8.32046829816799e-07	0.000585701209838917	HSP18.6	VAI61724.1 unnamed protein product [Triticum turgidum subsp. durum] [Triticum turgidum]
TraesCS7D02G180510LC	12	52	39	0	2	3	0.42	1.62	1.29	0	0.07	0.09	1.11	0.0533333333333333	-4.37938	8.34677164192445e-07	0.000585701209838917	--	SPT18889.1 unnamed protein product [Triticum aestivum]
TraesCS3D02G658400LC	91	22	59	10	7	9	6.79	1.42	4.07	0.63	0.49	0.58	4.09333333333333	0.566666666666667	-2.8527	9.13084336438975e-07	0.000629070837050748	Os05g0128200	XP_020189456.1 zinc finger CCCH domain-containing protein 33-like [Aegilops tauschii subsp. tauschii] [Aegilops tauschii]
TraesCS2A02G199600	413	205	377	156	119	140	17.07	7.32	14.43	5.44	4.67	4.98	12.94	5.03	-1.36321	9.34506227897274e-07	0.000639950990775171	FOR1	VAH28802.1 unnamed protein product [Triticum turgidum subsp. durum] [Triticum turgidum]
TraesCS6A02G287300LC	0	0	0	21	15	21	0	0	0	0.55	0.44	0.56	0.001	0.516666666666667	9.01308999944045	1.05825856228653e-06	0.000720357237036205	--	-
TraesCS4B02G071600	0	6	0	39	21	44	0	0.31	0	2.14	1.2	2.27	0.103333333333333	1.87	4.17766065022192	1.07830390618977e-06	0.000729633054428182	--	VAI02372.1 unnamed protein product [Triticum turgidum subsp. durum] [Triticum turgidum]
TraesCS1D02G106700	87	33	45	13	9	6	4.13	1.35	1.98	0.52	0.4	0.24	2.48666666666667	0.386666666666667	-2.68505	1.1285684598523e-06	0.000759125898287751	--	XP_020169711.1 uncharacterized protein LOC109755224 [Aegilops tauschii subsp. tauschii] [Aegilops tauschii]
TraesCSU02G290400LC	18	51	34	114	88	128	1.05	2.53	1.83	5.55	4.78	6.32	1.80333333333333	5.55	1.62182167813181	1.18223736064834e-06	0.000785925125417667	--	-
TraesCS6A02G015500	58	88	26	9	8	13	2.21	2.9	0.92	0.29	0.29	0.43	2.01	0.336666666666667	-2.5778	1.20381308514634e-06	0.00079101653225538	Os07g0271500	VAI41346.1 unnamed protein product [Triticum turgidum subsp. durum] [Triticum turgidum]
TraesCSU02G362000LC	0	0	0	11	17	31	0	0	0	0.47	0.78	1.31	0.001	0.853333333333333	9.73696559416621	1.27887962740289e-06	0.00083551264025447	MKK3	BAU88550.1 MAP kinase kinase [Triticum aestivum]
TraesCS5B02G490700	39	9	13	0	0	0	3.32	0.66	1.02	0	0	0	1.66666666666667	0.001	-10.7027	1.30413476839142e-06	0.000847143588951035	ZAT5	VAI39053.1 unnamed protein product [Triticum turgidum subsp. durum] [Triticum turgidum]
TraesCS4B02G212300	272	147	254	108	69	96	17.26	8.05	14.91	5.78	4.15	5.23	13.4066666666667	5.05333333333333	-1.40764	1.33233475305639e-06	0.000860544418881769	HSP17.4	VAI07383.1 unnamed protein product [Triticum turgidum subsp. durum] [Triticum turgidum]
TraesCS6D02G340500	110	150	67	322	250	239	5.08	5.98	2.86	12.55	10.91	9.47	4.64	10.9766666666667	1.24224330074662	1.37485704065832e-06	0.000882992224920429	--	XP_020146391.1 uncharacterized protein LOC109731630 [Aegilops tauschii subsp. tauschii] [Aegilops tauschii]
TraesCS2A02G624000LC	234	212	267	130	98	134	15.31	11.98	16.16	7.18	6.07	7.53	14.4833333333333	6.92666666666667	-1.06416	1.42064528131785e-06	0.00090626118330082	--	SPT20016.1 unnamed protein product [Triticum aestivum]
TraesCS6B02G396900LC	20	50	37	115	90	118	0.39	0.83	0.67	1.87	1.63	1.94	0.63	1.81333333333333	1.52522041702926	1.43183497020476e-06	0.00090626118330082	Os03g0733400	KAB8098581.1 hypothetical protein EE612_027915 [Oryza sativa]
TraesCS4B02G278100	149	125	139	65	52	63	6.71	4.84	5.79	2.47	2.22	2.44	5.78	2.37666666666667	-1.28213	1.43500455671902e-06	0.00090626118330082	HSFA2D	AIY25733.1 heat shock factor A6 [Triticum aestivum]
TraesCS2D02G568400	71	145	109	238	214	288	1.49	2.64	2.12	4.24	4.27	5.22	2.08333333333333	4.57666666666667	1.13540353059765	1.47309820188676e-06	0.000925178918761772	CHR24	XP_020175103.1 protein CHROMATIN REMODELING 24-like [Aegilops tauschii subsp. tauschii] [Aegilops tauschii]
TraesCS5D02G456100	31	8	18	0	0	0	1.16	0.26	0.62	0	0	0	0.68	0.001	-9.40939	1.63531807343692e-06	0.00101108655618736	CCR3	XP_020177904.1 putative serine/threonine-protein kinase-like protein CCR3 [Aegilops tauschii subsp. tauschii] [Aegilops tauschii]
TraesCS1B02G374300	18	17	14	56	67	63	0.76	0.62	0.54	2.01	2.7	2.29	0.64	2.33333333333333	1.86624861111117	1.73136520142039e-06	0.00106387244325333	DIVARICATA	VAH21996.1 unnamed protein product [Triticum turgidum subsp. durum] [Triticum turgidum]
TraesCS6B02G012100	69	147	73	206	249	274	2.21	4.09	2.18	5.59	7.6	7.57	2.82666666666667	6.92	1.29167027379468	1.89045030211146e-06	0.00115538020964045	CPN60B1	VAI52497.1 unnamed protein product [Triticum turgidum subsp. durum] [Triticum turgidum]
TraesCS5A02G330600	62	44	38	7	9	13	3.67	2.25	2.08	0.35	0.5	0.66	2.66666666666667	0.503333333333333	-2.40545	1.95083268437452e-06	0.00118590805915317	--	KAE8783521.1 hypothetical protein D1007_43041 [Hordeum vulgare]
TraesCS3D02G139600	164	102	107	52	39	48	5.65	3.04	3.41	1.51	1.27	1.42	4.03333333333333	1.4	-1.52655	2.06713613704122e-06	0.00123676755079176	BBX22	XP_020192017.1 B-box zinc finger protein 22-like [Aegilops tauschii subsp. tauschii] [Aegilops tauschii]
MSTRG.91865	15	60	47	102	140	186	0.5	1.71	1.55	2.91	4.64	5.47	1.25333333333333	4.34	1.79192	2.24523446557713e-06	0.00133076331370491	CPS1	ent-copalyl diphosphate synthase [Triticum aestivum]
TraesCS7D02G318800	418	869	824	285	316	393	5.46	8.25	8.51	2.64	3.29	3.72	7.40666666666667	3.21666666666667	-1.20326	2.24837627527883e-06	0.00133076331370491	GMI1	XP_020158019.1 uncharacterized protein LOC109743344 isoform X1 [Aegilops tauschii subsp. tauschii] [Aegilops tauschii]
TraesCS6D02G173700	118	166	133	30	49	71	1.54	1.88	1.61	0.33	0.66	0.8	1.67666666666667	0.596666666666667	-1.4906	2.25936046469424e-06	0.00133076331370491	Os06g0701100	XP_020152527.1 uncharacterized protein LOC109737812 [Aegilops tauschii subsp. tauschii] [Aegilops tauschii]
TraesCS1B02G116100	82	124	150	267	262	237	1.72	2.24	2.9	4.7	5.16	4.25	2.28666666666667	4.70333333333333	1.04043750642445	2.42486068437599e-06	0.00141359429752723	ELP2	XP_020162354.1 elongator complex protein 2 [Aegilops tauschii subsp. tauschii] [Aegilops tauschii]
MSTRG.91842	9	12	6	60	25	69	0.78	0.88	0.47	4.36	2.03	5.14	0.71	3.84333333333333	2.43646717742593	2.5182163385096e-06	0.00146052693220794	CPS1	ent-copalyl diphosphate synthase [Triticum aestivum]
TraesCS3B02G151700	129	139	79	372	221	241	7	6.51	3.96	17.02	11.34	11.22	5.82333333333333	13.1933333333333	1.17989200413075	2.56367148646282e-06	0.00147934255617581	XTH2	CDM82020.1 unnamed protein product [Triticum aestivum]
TraesCS5B02G149710LC	0	0	0	11	10	37	0	0	0	0.58	0.6	2	0.001	1.06	10.0498485494506	2.60663840491019e-06	0.00149283658307539	--	XP_020165174.1 uncharacterized protein LOC109750623 [Aegilops tauschii subsp. tauschii] [Aegilops tauschii]
TraesCS5D02G171000	26	24	15	114	75	55	1.17	0.93	0.63	4.37	3.23	2.14	0.91	3.24666666666667	1.83502082116249	2.61332090072753e-06	0.00149283658307539	--	VAI16811.1 unnamed protein product [Triticum turgidum subsp. durum] [Triticum turgidum]
TraesCSU02G498100LC	145	285	241	708	391	415	15.37	26.1	23.63	63.41	39.25	37.79	21.7	46.8166666666667	1.10932717596076	2.93670366119776e-06	0.00165428591248849	--	VAH55762.1 unnamed protein product [Triticum turgidum subsp. durum] [Triticum turgidum]
TraesCS6B02G175100	118	30	37	12	5	12	3.86	0.85	1.12	0.33	0.16	0.34	1.94333333333333	0.276666666666667	-2.81231	2.96803015268008e-06	0.00166205302298628	WRKY71	VAI56034.1 unnamed protein product [Triticum turgidum subsp. durum] [Triticum turgidum]
TraesCS7A02G198300	271	154	180	96	60	94	9.36	4.59	5.75	2.8	1.96	2.79	6.56666666666667	2.51666666666667	-1.38365	3.01704969265516e-06	0.00168122136231353	GATL9	XP_020169550.1 probable galacturonosyltransferase-like 9 [Aegilops tauschii subsp. tauschii] [Aegilops tauschii]
TraesCS5B02G376200LC	0	0	0	5	41	14	0	0	0	0.12	1.02	0.33	0.001	0.49	8.93663793900257	3.0655276596725e-06	0.00169990237935898	--	XP_020151118.1 uncharacterized protein LOC109736306 [Aegilops tauschii subsp. tauschii] [Aegilops tauschii]
TraesCS1B02G090700	452	569	313	1368	748	800	18.05	19.63	11.56	46.13	28.29	27.45	16.4133333333333	33.9566666666667	1.04882658355249	3.69259673325206e-06	0.00200693240944284	Os05g0129200	XP_020194240.1 endoglucanase 14-like [Aegilops tauschii subsp. tauschii] [Aegilops tauschii]
TraesCS6A02G316200	168	113	150	74	51	56	11.04	6.4	9.14	4.1	3.17	3.16	8.86	3.47666666666667	-1.3496	3.70748529590855e-06	0.00200693240944284	HSP24.1	VAI49653.1 unnamed protein product [Triticum turgidum subsp. durum] [Triticum turgidum]
TraesCS7B02G430300	0	0	0	10	23	17	0	0	0	0.21	0.53	0.36	0.001	0.366666666666667	8.51832530769087	3.78057524131249e-06	0.00202719080993717	CRK5	VAI93098.1 unnamed protein product [Triticum turgidum subsp. durum] [Triticum turgidum]
TraesCS2B02G095700	115	74	58	331	157	206	7.3	4.05	3.4	17.72	9.43	11.22	4.91666666666667	12.79	1.37926381046623	4.00863719098824e-06	0.00212939182224285	EXPB14	VAH41559.1 unnamed protein product [Triticum turgidum subsp. durum] [Triticum turgidum]
TraesCS1B02G435200	71	69	39	170	182	126	7.74	6.5	3.93	15.74	18.83	11.87	6.05666666666667	15.48	1.35380955263145	4.11397384760242e-06	0.00216520034050684	RL1	VAH23085.1 unnamed protein product [Triticum turgidum subsp. durum] [Triticum turgidum]
TraesCS7A02G182200LC	0	9	4	29	38	44	0	0.13	0.06	0.4	0.59	0.62	0.0633333333333333	0.536666666666667	3.08298936467103	4.11421687348275e-06	0.00216520034050684	--	VAI70985.1 unnamed protein product [Triticum turgidum subsp. durum] [Triticum turgidum]
TraesCS1A02G576300LC	452	327	364	249	156	186	83.55	52.15	62.29	38.82	27.29	29.56	65.9966666666667	31.89	-1.04929	4.13318854200923e-06	0.00216520034050684	--	RXH83055.1 hypothetical protein DVH24_003553 [Malus domestica]
TraesCS3B02G275200	36	25	19	76	73	119	1.5	0.9	0.73	2.67	2.88	4.26	1.04333333333333	3.27	1.64809047928663	4.20657060097408e-06	0.00219353360645381	TAR4	CDM83618.1 unnamed protein product [Triticum aestivum]
TraesCS1B02G134800	114	139	101	319	183	252	3.31	3.48	2.71	7.8	5.03	6.28	3.16666666666667	6.37	1.00832835975914	4.31047201915128e-06	0.00223744989826968	NIK3	VAH15045.1 unnamed protein product [Triticum turgidum subsp. durum] [Triticum turgidum]
TraesCS5B02G202200	264	280	147	587	559	408	6.11	5.59	3.14	11.44	12.23	8.09	4.94666666666667	10.5866666666667	1.09771982052216	4.41800258121173e-06	0.00228284217920184	TPS6	VAI32236.1 unnamed protein product [Triticum turgidum subsp. durum] [Triticum turgidum]
TraesCS6D02G224700	359	228	216	149	89	121	9.58	5.25	5.34	3.36	2.25	2.79	6.72333333333333	2.8	-1.26375	4.51604719368489e-06	0.002322944329577	At4g16820	XP_020156539.1 phospholipase A1-Ibeta2, chloroplastic-like [Aegilops tauschii subsp. tauschii] [Aegilops tauschii]
TraesCS1D02G314800	460	301	403	244	161	188	22.58	12.75	18.29	10.11	7.48	7.92	17.8733333333333	8.50333333333333	-1.07171	4.91394034227524e-06	0.00251622520850821	ERF4	XP_020193348.1 ethylene-responsive transcription factor 8-like [Aegilops tauschii subsp. tauschii] [Aegilops tauschii]
TraesCS6A02G384300	427	275	401	192	184	186	21.38	11.88	18.57	8.12	8.73	8.02	17.2766666666667	8.29	-1.05938	4.9981425349764e-06	0.00254786479349109	DESI1	VAI51320.1 unnamed protein product [Triticum turgidum subsp. durum] [Triticum turgidum]
TraesCS2A02G161500	46	26	13	0	2	3	1.95	0.95	0.51	0	0.08	0.11	1.13666666666667	0.0633333333333333	-4.1657	5.17741227054014e-06	0.00259274314836207	WRKY41	VAH27836.1 unnamed protein product [Triticum turgidum subsp. durum] [Triticum turgidum]
TraesCS3D02G041800	63	35	70	13	11	17	2.02	0.97	2.08	0.35	0.33	0.47	1.69	0.383333333333333	-2.14035	5.22778775981811e-06	0.00260648784724931	CBP60B	XP_020153225.1 calmodulin-binding protein 60 B-like [Aegilops tauschii subsp. tauschii] [Aegilops tauschii]
TraesCS2D02G571500	26	113	81	189	304	204	0.26	0.99	0.76	1.62	2.92	1.77	0.67	2.10333333333333	1.65044450380362	5.25397086495356e-06	0.00260810325770884	NRPB1	SPT20986.1 unnamed protein product [Triticum aestivum]
TraesCS1D02G173800	127	41	34	19	9	7	5.34	1.49	1.32	0.67	0.36	0.25	2.71666666666667	0.426666666666667	-2.67066	5.45563365766315e-06	0.00268476219611331	NHL6	XP_020183289.1 NDR1/HIN1-like protein 13 isoform X1 [Aegilops tauschii subsp. tauschii] [Aegilops tauschii]
TraesCSU02G072800	74	18	45	7	6	8	2.11	0.44	1.19	0.17	0.16	0.2	1.24666666666667	0.176666666666667	-2.81897	5.50268135773339e-06	0.00268556524077789	PLP3	XP_020201003.1 patatin-like protein 3 [Aegilops tauschii subsp. tauschii] [Aegilops tauschii]
TraesCS2A02G583000	89	22	32	7	7	7	5.53	1.17	1.84	0.39	0.41	0.37	2.84666666666667	0.39	-2.86773	5.50451455528602e-06	0.00268556524077789	CAF1-11	VAH39156.1 unnamed protein product [Triticum turgidum subsp. durum] [Triticum turgidum]
TraesCS2D02G028000LC	421	258	367	185	153	189	47.17	24.91	37.98	17.47	16.19	18.2	36.6866666666667	17.2866666666667	-1.0856	5.71358381062073e-06	0.00277565413179459	--	RWW05644.1 hypothetical protein GW17_00031074 [Ensete ventricosum]
TraesCS2B02G617000	0	0	0	22	10	15	0	0	0	0.98	0.52	0.7	0.001	0.733333333333333	9.51832530769087	6.4923684477031e-06	0.00312725833910825	RABC1	XP_020181650.1 ras-related protein RABC1 [Aegilops tauschii subsp. tauschii] [Aegilops tauschii]
TraesCS7B02G082000	46	13	23	1	3	1	3.3	0.81	1.53	0.06	0.2	0.06	1.88	0.106666666666667	-4.13955	6.58010907493325e-06	0.00315614792958307	--	VAI72079.1 unnamed protein product [Triticum turgidum subsp. durum] [Triticum turgidum]
TraesCS3B02G356400	68	30	41	14	4	8	5.42	2.06	3.02	0.94	0.3	0.55	3.5	0.596666666666667	-2.55236	7.33757181593634e-06	0.00349001318544015	--	CDM84535.1 unnamed protein product [Triticum aestivum]
TraesCS5D02G002400LC	0	0	0	18	11	16	0	0	0	1.29	0.9	1.19	0.001	1.12666666666667	10.1378450304484	7.72150224944568e-06	0.00364561462706205	--	XP_020171929.1 uncharacterized protein LOC109757518 [Aegilops tauschii subsp. tauschii] [Aegilops tauschii]
TraesCS7A02G269300	349	219	297	162	103	157	12.54	6.79	9.89	4.91	3.51	4.85	9.74	4.42333333333333	-1.13879	7.72885566228837e-06	0.00364561462706205	SDH	XP_020150689.1 sorbitol dehydrogenase [Aegilops tauschii subsp. tauschii] [Aegilops tauschii]
TraesCS2D02G116400LC	48	84	43	149	130	148	0.68	1.02	0.56	1.77	1.74	1.79	0.753333333333333	1.76666666666667	1.22966958703538	7.8335300208519e-06	0.00367971980239827	--	XP_020194113.1 uncharacterized protein LOC109779919, partial [Aegilops tauschii subsp. tauschii] [Aegilops tauschii]
TraesCS1A02G307500	156	103	71	351	287	212	16.58	9.45	6.92	31.44	28.86	19.3	10.9833333333333	26.5333333333333	1.2724899655356	8.05267507985785e-06	0.00376709442408642	--	VAH08651.1 unnamed protein product [Triticum turgidum subsp. durum] [Triticum turgidum]
TraesCS2A02G583400	272	205	227	121	116	127	12.84	8.36	9.88	4.83	5.16	5.12	10.36	5.03666666666667	-1.04048	8.25144894668625e-06	0.00380661543620476	NHL10	VAH39151.1 unnamed protein product [Triticum turgidum subsp. durum] [Triticum turgidum]
TraesCS3B02G424700	157	229	82	403	311	417	4.22	5.31	2.04	9.15	7.91	9.63	3.85666666666667	8.89666666666667	1.20591044103448	8.27110156621458e-06	0.00380661543620476	NPF8.1	VAH82599.1 unnamed protein product [Triticum turgidum subsp. durum] [Triticum turgidum]
TraesCS5D02G368500	0	2	3	26	20	28	0	0.03	0.05	0.43	0.37	0.47	0.0266666666666667	0.423333333333333	3.98868468677216	8.75395598135009e-06	0.00401259457295135	POB1	XP_020160202.1 BTB/POZ domain-containing protein POB1-like [Aegilops tauschii subsp. tauschii] [Aegilops tauschii]
TraesCS5B02G406000	122	37	79	18	17	25	5.22	1.37	3.13	0.65	0.69	0.92	3.24	0.753333333333333	-2.10463	8.82781097061239e-06	0.00403019705906147	AZF2	Q42430.1 RecName: Full=Zinc finger protein 1; AltName: Full=WZF1 [Triticum aestivum]
TraesCS2D02G567700	0	0	0	18	21	7	0	0	0	0.7	0.91	0.28	0.001	0.63	9.29920801838728	8.96535727870866e-06	0.00407661967748706	SRM1	SPT20961.1 unnamed protein product [Triticum aestivum]
MSTRG.26452	102	59	65	26	25	19	5.15	2.57	3.03	1.11	1.19	0.82	3.58333333333333	1.04	-1.78472	9.01620585597119e-06	0.00408340730314437	HIPP39	heavy metal-associated isoprenylated plant protein 39-like [Triticum aestivum]
TraesCS1D02G316100	259	182	230	110	89	134	18.25	11.07	14.99	6.54	5.94	8.11	14.77	6.86333333333333	-1.10569	1.07254560035788e-05	0.00480014827605838	--	XP_020160945.1 uncharacterized protein LOC109746231 [Aegilops tauschii subsp. tauschii] [Aegilops tauschii]
TraesCS2D02G411300	165	144	112	80	41	58	7.21	5.43	4.53	2.95	1.7	2.18	5.72333333333333	2.27666666666667	-1.32993	1.1053264796485e-05	0.0049274587540001	CYCP2-1	XP_020164577.1 cyclin-P2-1-like [Aegilops tauschii subsp. tauschii] [Aegilops tauschii]
TraesCS1A02G425210LC	64	58	72	17	26	17	3.64	2.83	3.75	0.81	1.42	0.84	3.40666666666667	1.02333333333333	-1.73508	1.1358294788733e-05	0.00502403453968405	RE2	XP_020161735.1 uncharacterized protein LOC109747051 [Aegilops tauschii subsp. tauschii] [Aegilops tauschii]
TraesCS6A02G393500	95	28	40	15	2	10	3.77	0.96	1.47	0.5	0.08	0.34	2.06666666666667	0.306666666666667	-2.75256	1.17371337229838e-05	0.00516692041118145	--	VAI51550.1 unnamed protein product [Triticum turgidum subsp. durum] [Triticum turgidum]
TraesCS7B02G036500	12	8	3	53	48	29	0.5	0.29	0.12	1.89	1.91	1.05	0.303333333333333	1.61666666666667	2.4140462968758	1.17722352498394e-05	0.00516692041118145	DIVARICATA	VAI83196.1 unnamed protein product [Triticum turgidum subsp. durum] [Triticum turgidum]
TraesCS3B02G143300LC	29	38	53	86	124	114	0.97	1.1	1.64	2.43	3.93	3.28	1.23666666666667	3.21333333333333	1.37761395960915	1.25784207793752e-05	0.00547845647102313	TY3B-G	ADB85398.1 putative retrotransposon protein [Phyllostachys edulis]
TraesCS1D02G376700	33	8	6	0	0	0	1.64	0.34	0.28	0	0	0	0.753333333333333	0.001	-9.55714	1.28536519808684e-05	0.00557696410774495	ERF109	XP_020149093.1 ethylene-responsive transcription factor ERF109-like [Aegilops tauschii subsp. tauschii] [Aegilops tauschii]
TraesCS6B02G165900LC	11	15	28	55	67	71	0.87	1.03	2.05	3.65	5.06	4.83	1.31666666666667	4.51333333333333	1.77730318051053	1.33100583374574e-05	0.00573124053646644	--	XP_025825169.1 zinc finger MYM-type protein 1-like, partial [Panicum hallii]
TraesCS4B02G112500	158	70	94	42	22	43	5.38	2.06	2.96	1.21	0.71	1.26	3.46666666666667	1.06	-1.70948	1.46394445376155e-05	0.00616358569149082	ROH1	VAI03558.1 unnamed protein product [Triticum turgidum subsp. durum] [Triticum turgidum]
TraesCS2B02G501700	45	69	38	151	118	107	4.16	5.51	3.25	11.78	10.37	8.5	4.30666666666667	10.2166666666667	1.24628100388422	1.52814672514683e-05	0.00638658585568076	Os03g0429000	VAH52264.1 unnamed protein product [Triticum turgidum subsp. durum] [Triticum turgidum]
TraesCS7B02G426400LC	11	11	18	0	0	0	0.44	0.39	0.67	0	0	0	0.5	0.001	-8.96578	1.55942298204243e-05	0.00641561256776883	RE1	VAI85912.1 unnamed protein product [Triticum turgidum subsp. durum] [Triticum turgidum]
TraesCS6D02G393700	84	33	86	15	15	23	3.48	1.18	3.29	0.52	0.59	0.82	2.65	0.643333333333333	-2.04235	1.56234364024608e-05	0.00641561256776883	--	XP_020173374.1 uncharacterized protein LOC109758922 [Aegilops tauschii subsp. tauschii] [Aegilops tauschii]
TraesCS3B02G297800	95	74	81	45	19	21	8.26	5.56	6.52	3.3	1.56	1.57	6.78	2.14333333333333	-1.66143	1.66518110983647e-05	0.00678468792196703	--	CDM83898.1 unnamed protein product [Triticum aestivum]
TraesCS6A02G138110LC	0	0	0	13	22	7	0	0	0	0.29	0.56	0.16	0.001	0.336666666666667	8.39518	1.74253929203822e-05	0.00704934658722523	--	XP_020149841.1 uncharacterized protein LOC109735055 isoform X1 [Aegilops tauschii subsp. tauschii] [Aegilops tauschii]
TraesCS4D02G070400	3	0	5	28	27	25	0.1	0	0.16	0.8	0.87	0.73	0.0866666666666667	0.8	3.20645087746743	1.7735364246553e-05	0.00714930142360074	ARI1	XP_020159024.1 probable E3 ubiquitin-protein ligase ARI1 [Aegilops tauschii subsp. tauschii] [Aegilops tauschii]
TraesCS5B02G457300	30	6	30	0	0	1	1.07	0.18	0.99	0	0	0.03	0.746666666666667	0.01	-6.22239	1.78161660822219e-05	0.00715649580116161	CCR3	VAI38369.1 unnamed protein product [Triticum turgidum subsp. durum] [Triticum turgidum]
TraesCS7A02G177100	50	12	23	4	2	2	0.82	0.16	0.35	0.06	0.03	0.03	0.443333333333333	0.04	-3.47032	1.79970729047787e-05	0.00720370864998778	--	VAI72081.1 unnamed protein product [Triticum turgidum subsp. durum] [Triticum turgidum]
TraesCS2D02G014500	13	35	11	101	68	55	0.56	1.3	0.44	3.67	2.77	2.03	0.766666666666667	2.82333333333333	1.88072810838782	1.83777109075023e-05	0.00733025629063907	CYP85A1	XP_020191920.1 cytochrome P450 85A1-like [Aegilops tauschii subsp. tauschii] [Aegilops tauschii]
TraesCS5D02G491100	40	15	18	2	1	3	3.41	1.1	1.42	0.14	0.08	0.22	1.97666666666667	0.146666666666667	-3.75246	2.04943392016148e-05	0.00813728006401517	ZAT5	XP_020198422.1 zinc finger protein ZAT8-like [Aegilops tauschii subsp. tauschii] [Aegilops tauschii]
TraesCS6D02G233500	171	125	142	85	58	60	14.87	9.4	11.44	6.25	4.78	4.49	11.9033333333333	5.17333333333333	-1.2022	2.05441679352231e-05	0.00813728006401517	--	XP_020194852.1 uncharacterized protein LOC109780684 [Aegilops tauschii subsp. tauschii] [Aegilops tauschii]
MSTRG.51688	0	0	0	12	13	14	0	0	0	0.8	0.98	0.95	0.001	0.91	9.82972273508606	2.06189133072447e-05	0.00813852850009602	--	-
TraesCS6B02G234900	87	85	138	39	40	46	2.62	2.21	3.83	1	1.14	1.2	2.88666666666667	1.11333333333333	-1.37452	2.14776709927384e-05	0.00839009348948976	OSA15	VAI57579.1 unnamed protein product [Triticum turgidum subsp. durum] [Triticum turgidum]
TraesCS3B02G536200	207	68	94	47	38	28	12.88	3.66	5.41	2.47	2.24	1.5	7.31666666666667	2.07	-1.82156	2.28230934198227e-05	0.00888513969412734	CML15	CDM86427.1 unnamed protein product [Triticum aestivum]
MSTRG.2171	23	36	23	1	1	7	0.93	1.26	0.86	0.03	0.04	0.24	1.01666666666667	0.103333333333333	-3.29847	2.29812655821452e-05	0.00891618200539766	--	probable serine/threonine-protein kinase PBL17 isoform X2 [Aegilops tauschii subsp. strangulata] [Aegilops tauschii]
TraesCS6B02G166000LC	21	21	21	63	52	76	1.72	1.49	1.57	4.41	4.08	5.33	1.59333333333333	4.60666666666667	1.53167509240751	2.35743940089214e-05	0.00906670525347225	--	XP_025815385.1 zinc finger MYM-type protein 1-like [Panicum hallii]
TraesCSU02G101900	27	27	23	124	65	56	2.02	1.75	1.59	7.84	4.61	3.6	1.78666666666667	5.35	1.58226839155189	2.36085114405534e-05	0.00906670525347225	--	XP_020148700.1 uncharacterized protein LOC109733895 [Aegilops tauschii subsp. tauschii] [Aegilops tauschii]
TraesCS2A02G484100	373	231	407	178	128	201	15.81	8.46	15.98	6.36	5.14	7.31	13.4166666666667	6.27	-1.09749	2.37236530185304e-05	0.00908024816224741	XTH9	VAH37132.1 unnamed protein product [Triticum turgidum subsp. durum] [Triticum turgidum]
TraesCS1B02G326600	334	189	262	163	86	119	17.56	8.58	12.74	7.23	4.28	5.37	12.96	5.62666666666667	-1.20371	2.49832902856813e-05	0.00949449511807636	ERF4	ABC65855.1 ethylene-responsive factor-like transcription factor ERFL2a [Triticum aestivum]
TraesCS2D02G162300	181	125	120	70	56	68	11.11	6.65	6.83	3.61	3.26	3.59	8.19666666666667	3.48666666666667	-1.23319	2.54399078442629e-05	0.00960774885053911	--	XP_020192323.1 probable calcium-binding protein CML45 [Aegilops tauschii subsp. tauschii] [Aegilops tauschii]
TraesCS4A02G124200LC	142	75	93	43	39	35	7.6	3.44	4.6	1.94	1.97	1.61	5.21333333333333	1.84	-1.5025	2.5893198372221e-05	0.00971439310679529	--	VAH90084.1 unnamed protein product [Triticum turgidum subsp. durum] [Triticum turgidum]
TraesCS4D02G367500LC	252	190	238	130	93	138	14.07	9.16	12.29	6.14	4.91	6.62	11.84	5.89	-1.00733	2.63206966858989e-05	0.00984229551698331	--	ACR34576.1 unknown [Zea mays]
TraesCS6B02G336500	278	176	281	131	72	143	19.55	10.69	18.26	7.79	4.8	8.61	16.1666666666667	7.06666666666667	-1.19392	2.72680457226101e-05	0.0101014863076526	EXPA5	VAI60817.1 unnamed protein product [Triticum turgidum subsp. durum] [Triticum turgidum]
TraesCS7D02G200600	212	128	141	71	55	88	7.88	4.11	4.85	2.23	1.94	2.81	5.61333333333333	2.32666666666667	-1.27059	2.84161415236692e-05	0.0104539214239034	GATL9	XP_020169550.1 probable galacturonosyltransferase-like 9 [Aegilops tauschii subsp. tauschii] [Aegilops tauschii]
TraesCS6A02G410800	46	15	24	6	2	2	1.95	0.55	0.95	0.22	0.08	0.07	1.15	0.123333333333333	-3.221	3.1001407474805e-05	0.0112953429407481	--	XP_020173374.1 uncharacterized protein LOC109758922 [Aegilops tauschii subsp. tauschii] [Aegilops tauschii]
TraesCS4D02G298600	182	70	126	57	24	49	8.01	2.66	5.13	2.12	1	1.85	5.26666666666667	1.65666666666667	-1.66861	3.21323661963529e-05	0.0116328375544675	RAP2-3	XP_020163641.1 ethylene-responsive transcription factor ERF073-like [Aegilops tauschii subsp. tauschii] [Aegilops tauschii]
TraesCS5B02G130900LC	48	67	57	106	111	216	0.61	0.74	0.68	1.15	1.35	2.38	0.676666666666667	1.62666666666667	1.26540142037771	3.26491508865864e-05	0.0117712846874206	Tf2-12	ABA97970.1 retrotransposon protein, putative, unclassified, expressed [Oryza sativa Japonica Group]
TraesCS7D02G135700	53	66	31	180	165	82	2.05	2.22	1.11	5.87	6.04	2.71	1.79333333333333	4.87333333333333	1.44226523339581	3.27218871119479e-05	0.0117712846874206	DIVARICATA	XP_020167095.1 uncharacterized protein LOC109752608 [Aegilops tauschii subsp. tauschii] [Aegilops tauschii]
TraesCS7A02G294900LC	6	3	2	16	60	21	0.26	0.11	0.08	0.59	2.5	0.79	0.15	1.29333333333333	3.10805974585745	3.51394389627946e-05	0.0124781738309724	--	XP_020158176.1 uncharacterized protein LOC109743495 [Aegilops tauschii subsp. tauschii] [Aegilops tauschii]
TraesCS3A02G178200	17	50	29	81	77	129	1.16	3.04	1.88	4.87	5.07	7.71	2.02666666666667	5.88333333333333	1.53752495471495	3.57752771314994e-05	0.0126298949642157	--	VAH59906.1 unnamed protein product [Triticum turgidum subsp. durum] [Triticum turgidum]
TraesCS3B02G335100	116	107	64	222	161	248	4.91	4	2.48	8.04	6.57	9.12	3.79666666666667	7.91	1.05894435348583	3.80503650990932e-05	0.0133501584980544	IPK	CDM81503.1 unnamed protein product [Triticum aestivum]
TraesCS5D02G490700	28	7	5	0	0	0	1.98	0.43	0.33	0	0	0	0.913333333333333	0.001	-9.835	3.84514416667526e-05	0.0134493677980044	ZAT5	XP_020198427.1 zinc finger protein ZAT8-like [Aegilops tauschii subsp. tauschii] [Aegilops tauschii]
TraesCS3D02G325400	55	15	57	10	4	9	2.03	0.48	1.95	0.31	0.14	0.29	1.48666666666667	0.246666666666667	-2.59145	3.96539955606102e-05	0.013701359432655	At5g07050	XP_020146685.1 WAT1-related protein At5g07050-like [Aegilops tauschii subsp. tauschii] [Aegilops tauschii]
TraesCS3B02G462000LC	1	4	4	44	19	17	0.04	0.15	0.16	1.63	0.79	0.64	0.116666666666667	1.02	3.12810482574768	4.68878602532255e-05	0.015688675051934	--	XP_023157287.1 protein binding protein isoform X1 [Zea mays]
MSTRG.91913	0	4	0	24	17	24	0	0.16	0	0.92	0.73	0.93	0.0533333333333333	0.86	4.01122725542325	4.69237358274547e-05	0.015688675051934	TET7	tetraspanin-8 [Aegilops tauschii subsp. strangulata] [Aegilops tauschii]
TraesCS4B02G155500	121	84	112	34	34	61	5.46	3.27	4.68	1.3	1.47	2.37	4.47	1.71333333333333	-1.38347	4.7209473080846e-05	0.015737921617042	At3g14260	VAI05625.1 unnamed protein product [Triticum turgidum subsp. durum] [Triticum turgidum]
TraesCS3D02G418900	62	98	79	27	36	11	1.89	2.51	2.14	0.69	1.04	0.28	2.18	0.67	-1.7021	4.8318567795601e-05	0.0160605550622823	At1g56140	BAJ95627.1 predicted protein [Hordeum vulgare subsp. vulgare] [Hordeum vulgare]
TraesCS5A02G245100LC	146	139	144	89	53	76	9.03	7.46	8.28	4.67	3.14	4.07	8.25666666666667	3.96	-1.06006	4.91688374884984e-05	0.0162955275194753	CML36	VAI29910.1 unnamed protein product [Triticum turgidum subsp. durum] [Triticum turgidum]
TraesCS2D02G112800	128	109	39	324	212	209	5.64	4.17	1.59	12.05	8.83	7.93	3.8	9.60333333333333	1.33753583610777	5.03928782302657e-05	0.0165860468673438	--	SPT16386.1 unnamed protein product [Triticum aestivum]
TraesCS1B02G215500LC	0	12	7	20	56	52	0	0.51	0.32	0.83	2.61	2.2	0.276666666666667	1.88	2.76451192105187	5.12800215718156e-05	0.0165947806909758	--	XP_020175491.1 uncharacterized protein LOC109761108 [Aegilops tauschii subsp. tauschii] [Aegilops tauschii]
TraesCS1B02G559400LC	164	179	95	345	364	237	4.83	4.55	2.58	8.58	10.14	5.99	3.98666666666667	8.23666666666667	1.04687762113068	5.20687681813295e-05	0.0167230890327488	Os05g0495700	VAH08755.1 unnamed protein product [Triticum turgidum subsp. durum] [Triticum turgidum]
TraesCS3B02G139800	50	78	52	170	131	106	1.91	2.58	1.84	5.48	4.75	3.49	2.11	4.57333333333333	1.11600307674447	5.50454906470718e-05	0.0174443547653916	CDR1	CDM81803.1 unnamed protein product [Triticum aestivum]
TraesCS7A02G450400	408	176	235	135	115	119	35.86	13.35	19.1	10.01	9.57	8.98	22.77	9.52	-1.2581	5.63272853496546e-05	0.0177864356019241	KRP1	EMS61847.1 Calcium-binding protein KIC [Triticum urartu]
TraesCS4A02G011800LC	63	30	23	3	12	3	2.5	1.02	0.83	0.11	0.47	0.11	1.45	0.23	-2.65635	5.68489731866266e-05	0.0179014424513467	--	-
TraesCS6B02G263800	30	13	16	1	1	0	1.04	0.39	0.51	0.03	0.03	0	0.646666666666667	0.02	-5.01495	5.85949876325857e-05	0.0183495934135246	ERF053	VAI58869.1 unnamed protein product [Triticum turgidum subsp. durum] [Triticum turgidum]
TraesCS2D02G448300	28	26	21	65	60	82	0.92	0.73	0.64	1.79	1.86	2.3	0.763333333333333	1.98333333333333	1.37754207009836	5.98402929560059e-05	0.0186164331918739	--	SPT19862.1 unnamed protein product [Triticum aestivum]
TraesCS3D02G484900	106	52	53	24	15	28	7.33	3.11	3.38	1.4	0.98	1.66	4.60666666666667	1.34666666666667	-1.77433	5.9938374061823e-05	0.0186164331918739	CML15	XP_020198328.1 probable calcium-binding protein CML10 [Aegilops tauschii subsp. tauschii] [Aegilops tauschii]
TraesCS3D02G320400	47	30	31	9	9	7	3.82	2.1	2.33	0.62	0.69	0.49	2.75	0.6	-2.1964	6.0223886073569e-05	0.0186541435890602	--	XP_020164123.1 uncharacterized protein LOC109749587 [Aegilops tauschii subsp. tauschii] [Aegilops tauschii]
TraesCS3A02G041700	248	121	132	93	42	68	14.06	5.91	6.91	4.46	2.25	3.31	8.96	3.34	-1.42365	6.23837581445491e-05	0.0192184240504008	--	VAH56065.1 unnamed protein product [Triticum turgidum subsp. durum] [Triticum turgidum]
TraesCS2D02G071200	10	8	4	50	38	23	0.91	0.59	0.33	3.76	3.25	1.79	0.61	2.93333333333333	2.26565987524062	6.47745046829956e-05	0.0199010036995916	RR42	XP_020158433.1 two-component response regulator ORR42-like [Aegilops tauschii subsp. tauschii] [Aegilops tauschii]
TraesCS4D02G024900	90	12	52	5	13	7	3.35	0.38	1.8	0.16	0.47	0.23	1.84333333333333	0.286666666666667	-2.68487	6.51667597479699e-05	0.0199138756663171	At5g03810	XP_020179162.1 GDSL esterase/lipase At5g03810-like [Aegilops tauschii subsp. tauschii] [Aegilops tauschii]
TraesCS2D02G074500	20	28	12	93	64	44	0.99	1.2	0.55	3.87	2.99	1.88	0.913333333333333	2.91333333333333	1.67345738654007	6.63089706705057e-05	0.0202063679611628	--	XP_020194266.1 uncharacterized protein LOC109780089 [Aegilops tauschii subsp. tauschii] [Aegilops tauschii]
TraesCS6A02G301900	291	171	265	148	89	129	10.21	5.18	8.6	4.38	2.95	3.89	7.99666666666667	3.74	-1.09636	6.64794251913305e-05	0.0202063679611628	RAP2-4	ABC74511.1 DRF-like transcription factor DRFL2c [Triticum aestivum]
TraesCS2A02G452800	121	85	66	350	201	142	9.9	6	4.99	24.17	15.56	9.98	6.96333333333333	16.57	1.2507236108755	6.8328022893711e-05	0.0206029831790143	--	VAH36456.1 unnamed protein product [Triticum turgidum subsp. durum] [Triticum turgidum]
TraesCS3D02G017400LC	43	9	14	3	0	0	2.44	0.43	0.75	0.16	0	0	1.20666666666667	0.0533333333333333	-4.49985	7.12616849130556e-05	0.0213179330417406	--	BAS88051.1 Os04g0196850, partial [Oryza sativa Japonica Group]
TraesCS4A02G423900	28	28	50	12	6	4	0.7	0.61	1.16	0.25	0.14	0.09	0.823333333333333	0.16	-2.3634	7.18849084557434e-05	0.0213917820380197	SBT1.5	KAE8818773.1 Subtilisin-like protease [Hordeum vulgare]
TraesCS7B02G236500	2	4	2	33	14	23	0.11	0.19	0.1	1.57	0.75	1.11	0.133333333333333	1.14333333333333	3.10013667128545	7.51326531297191e-05	0.0221840379476028	--	VAI88908.1 unnamed protein product [Triticum turgidum subsp. durum] [Triticum turgidum]
TraesCS7D02G157300	62	20	27	5	5	10	3.86	1.07	1.55	0.26	0.29	0.53	2.16	0.36	-2.58496	7.5559017149253e-05	0.022252130550455	ATL60	XP_020196033.1 RING-H2 finger protein ATL3-like [Aegilops tauschii subsp. tauschii] [Aegilops tauschii]
TraesCS6A02G053400	147	118	220	100	54	66	25.99	18.01	35.98	14.92	9.04	10.02	26.66	11.3266666666667	-1.23495	7.63076740977545e-05	0.0224145412620425	--	VAI42250.1 unnamed protein product [Triticum turgidum subsp. durum] [Triticum turgidum]
TraesCS3D02G455000	20	25	28	2	4	5	0.91	1.01	1.16	0.09	0.17	0.21	1.02666666666667	0.156666666666667	-2.7122	7.66821390487337e-05	0.0224148118929501	FHA2	XP_020158824.1 FHA domain-containing protein FHA2-like isoform X1 [Aegilops tauschii subsp. tauschii] [Aegilops tauschii]
TraesCSU02G127800	128	149	204	98	72	72	4.47	4.48	6.58	2.87	2.37	2.17	5.17666666666667	2.47	-1.06751	7.67029550952048e-05	0.0224148118929501	ufd1	XP_020201264.1 uncharacterized protein LOC109787117 [Aegilops tauschii subsp. tauschii] [Aegilops tauschii]
TraesCS5D02G339000LC	329	194	281	172	120	124	20.06	10.2	15.83	8.86	6.92	6.48	15.3633333333333	7.42	-1.05	7.82409938726945e-05	0.022689289439965	XERICO	XP_020176248.1 probable E3 ubiquitin-protein ligase XERICO [Aegilops tauschii subsp. tauschii] [Aegilops tauschii]
TraesCS1A02G260800	1	0	0	23	21	7	0.1	0	0	1.94	1.99	0.6	0.0333333333333333	1.51	5.50143914515887	8.08120500870295e-05	0.0233159173039169	--	VAH07489.1 unnamed protein product [Triticum turgidum subsp. durum] [Triticum turgidum]
TraesCS5D02G290600	10	1	1	37	43	19	0.43	0.04	0.04	1.35	1.75	0.7	0.17	1.26666666666667	2.89743026635946	8.11850140349829e-05	0.0233642249125437	SRG1	XP_020186882.1 protein SRG1-like [Aegilops tauschii subsp. tauschii] [Aegilops tauschii]
TraesCS3D02G115300	77	31	53	9	16	18	6.44	2.24	4.1	0.64	1.27	1.29	4.26	1.06666666666667	-1.99774	8.22944725861564e-05	0.0235642034261373	HSP18	XP_020189893.1 17.5 kDa class II heat shock protein-like [Aegilops tauschii subsp. tauschii] [Aegilops tauschii]
TraesCS3D02G115000	55	5	37	3	3	5	3.99	0.32	2.5	0.19	0.21	0.31	2.27	0.236666666666667	-3.26176	8.36201865177676e-05	0.0238630694856843	HSP18	XP_020189626.1 17.5 kDa class II heat shock protein-like [Aegilops tauschii subsp. tauschii] [Aegilops tauschii]
MSTRG.28375	0	0	0	10	11	11	0	0	0	0.94	1.16	1.05	0.001	1.05	10.0361736125535	8.70550222503178e-05	0.0246172979212671	--	neural Wiskott-Aldrich syndrome protein-like [Triticum aestivum]
TraesCS6A02G146900	126	30	78	27	12	25	3.95	0.81	2.26	0.71	0.36	0.66	2.34	0.576666666666667	-2.0207	8.96740342930528e-05	0.0251929899214648	WRKY71	AFW98256.1 WRKY80 transcription factor [Triticum aestivum]
TraesCS3D02G446700	485	229	240	170	127	152	18.84	7.68	8.61	5.59	4.66	5.07	11.71	5.10666666666667	-1.19729	9.0052510193547e-05	0.0251929899214648	SRC2	VAH84309.1 unnamed protein product [Triticum turgidum subsp. durum] [Triticum turgidum]
TraesCS6D02G403800	29	42	14	79	93	75	0.62	0.77	0.27	1.41	1.86	1.37	0.553333333333333	1.54666666666667	1.48294156378065	9.01989575554964e-05	0.0251929899214648	SUS7	XP_020163861.1 sucrose synthase 7-like [Aegilops tauschii subsp. tauschii] [Aegilops tauschii]
TraesCS7B02G183900	81	86	71	40	28	35	3.35	3.05	2.72	1.38	1.1	1.25	3.04	1.24333333333333	-1.28986	9.13309824729842e-05	0.0253844305490988	FUT11	XP_020179476.1 putative fucosyltransferase-like protein [Aegilops tauschii subsp. tauschii] [Aegilops tauschii]
MSTRG.87074	12	7	10	49	27	43	0.98	0.5	0.76	3.42	2.15	3.03	0.746666666666667	2.86666666666667	1.94083792753186	9.20641038730761e-05	0.025525783258487	--	protein AAR2 homolog [Triticum dicoccoides]
TraesCS7A02G270100	150	76	109	56	37	48	5.43	2.39	3.65	1.79	1.34	1.49	3.82333333333333	1.54	-1.3119	9.63885791432999e-05	0.0264603052020853	HSFB2B	AJR10106.1 heat-responsive transcription factor [Triticum aestivum]
MSTRG.35867	0	0	0	8	10	14	0	0	0	0.34	0.48	0.61	0.001	0.476666666666667	8.8968369309446	9.6598490977642e-05	0.0264603052020853	--	1-deoxy-D-xylulose 5-phosphate reductoisomerase-like isoform X2 [Triticum dicoccoides]
TraesCS3B02G190100	52	73	46	146	113	110	1.15	1.4	0.96	2.75	2.39	2.1	1.17	2.41333333333333	1.04451866677864	0.000100514212129982	0.0274667165680287	ARF1	CDM82308.1 unnamed protein product [Triticum aestivum]
TraesCS7B02G030700LC	37	43	66	98	108	128	0.59	0.6	0.98	1.33	1.64	1.76	0.723333333333333	1.57666666666667	1.12414514089492	0.000107112000627464	0.0290600737358668	Tf2-12	ADB85398.1 putative retrotransposon protein [Phyllostachys edulis]
TraesCS2D02G104300	111	16	42	8	13	12	2.14	0.27	0.75	0.13	0.24	0.2	1.05333333333333	0.19	-2.47089	0.000109131922361525	0.0295375941387883	--	XP_020186131.1 flocculation protein FLO11-like [Aegilops tauschii subsp. tauschii] [Aegilops tauschii]
TraesCS3A02G537100LC	5	0	2	30	13	28	0.19	0	0.06	0.95	0.46	0.9	0.0833333333333333	0.77	3.20789285164133	0.00011082516743107	0.029783150255465	--	XP_020173829.1 uncharacterized protein LOC109759416 [Aegilops tauschii subsp. tauschii] [Aegilops tauschii]
TraesCS5D02G411400	52	13	30	6	3	7	1.82	0.39	0.97	0.18	0.1	0.21	1.06	0.163333333333333	-2.69817	0.000115240999067113	0.0306080632031595	AZF2	XP_020167815.1 zinc finger protein 1 [Aegilops tauschii subsp. tauschii] [Aegilops tauschii]
TraesCS3D02G115100	22	1	14	0	0	0	1.71	0.07	0.99	0	0	0	0.923333333333333	0.001	-9.85071	0.000115698721409617	0.0306580036216341	HSP18	XP_020189114.1 17.5 kDa class II heat shock protein-like [Aegilops tauschii subsp. tauschii] [Aegilops tauschii]
TraesCS1A02G411100	110	59	81	42	30	19	3.3	1.53	2.22	1.05	0.83	0.49	2.35	0.79	-1.57274	0.000122904566877871	0.032337926703653	ERF061	AGH18698.1 AP2/ERF domain-containing transcription factor [Triticum turgidum subsp. durum] [Triticum turgidum]
TraesCS6D02G010900	9	7	2	37	30	27	0.45	0.3	0.11	1.55	1.4	1.14	0.286666666666667	1.36333333333333	2.24969227823965	0.000125171339182212	0.0327859500557979	--	XP_020191459.1 uncharacterized protein LOC109777229 [Aegilops tauschii subsp. tauschii] [Aegilops tauschii]
TraesCS4A02G405500	116	45	82	40	15	25	10.69	3.58	6.99	3.11	1.31	1.98	7.08666666666667	2.13333333333333	-1.732	0.000125677846734062	0.0328429438693976	--	-
TraesCS5A02G477900	58	6	6	2	0	1	3.91	0.35	0.37	0.11	0	0.06	1.54333333333333	0.0566666666666667	-4.76741	0.000128835606546512	0.0333613786910886	ZAT5	VAI24171.1 unnamed protein product [Triticum turgidum subsp. durum] [Triticum turgidum]
TraesCS5B02G285300LC	0	0	0	10	15	6	0	0	0	0.22	0.38	0.14	0.001	0.246666666666667	7.94641895979516	0.000129408860626514	0.0334336614760006	FRS5	XP_025880431.1 protein FAR1-RELATED SEQUENCE 5 [Oryza sativa Japonica Group]
TraesCS5A02G491000	144	183	103	83	52	74	14.86	16.27	9.81	7.25	5.07	6.55	13.6466666666667	6.29	-1.11742	0.000129941316226714	0.0334950997839096	CYCB1-2	EMS55676.1 hypothetical protein TRIUR3_04849 [Triticum urartu]
TraesCS1D02G306900	139	82	63	288	215	168	15.25	7.81	6.4	26.73	22.4	15.84	9.82	21.6566666666667	1.14101627481057	0.000132156757317097	0.0339891033971395	--	XP_020181629.1 uncharacterized protein At1g05835-like [Aegilops tauschii subsp. tauschii] [Aegilops tauschii]
TraesCS3A02G178100	12	45	35	50	107	146	0.6	1.94	1.63	2.12	5.1	6.32	1.39	4.51333333333333	1.69910845013033	0.000132841583717391	0.034019807967873	--	EMS66472.1 hypothetical protein TRIUR3_06012 [Triticum urartu]
TraesCS3A02G342600	54	31	28	13	7	8	1.87	0.91	0.88	0.36	0.23	0.23	1.22	0.273333333333333	-2.15815	0.000132874677707325	0.034019807967873	--	VAH65416.1 unnamed protein product [Triticum turgidum subsp. durum] [Triticum turgidum]
TraesCS2A02G128600	27	36	19	93	59	68	1.49	1.72	0.97	4.27	3.06	3.21	1.39333333333333	3.51333333333333	1.33430001955633	0.00013366741295927	0.0341458662988111	--	VAH27019.1 unnamed protein product [Triticum turgidum subsp. durum] [Triticum turgidum]
TraesCS7A02G256900	60	52	47	13	17	24	3.77	2.81	2.76	0.71	0.99	1.28	3.11333333333333	0.993333333333333	-1.64811	0.000136077033343335	0.0345296606447837	NUDT15	VAI74285.1 unnamed protein product [Triticum turgidum subsp. durum] [Triticum turgidum]
TraesCS5B02G484500LC	124	141	161	97	46	70	18.65	18.36	22.37	12.36	6.59	9.06	19.7933333333333	9.33666666666667	-1.08404	0.000136543230006072	0.0345697656066821	-	-
TraesCS6B02G127100	80	30	24	10	13	5	3.82	1.24	1.06	0.4	0.59	0.21	2.04	0.4	-2.3505	0.000141544445161332	0.035677046325066	--	VAI54809.1 unnamed protein product [Triticum turgidum subsp. durum] [Triticum turgidum]
TraesCS5A02G440500	17	16	18	1	1	2	0.82	0.66	0.8	0.04	0.05	0.08	0.76	0.0566666666666667	-3.74543	0.000142353416356653	0.0357652791331925	BPM1	VAI23323.1 unnamed protein product [Triticum turgidum subsp. durum] [Triticum turgidum]
TraesCS6A02G096800	54	52	65	24	19	22	1.7	1.42	1.91	0.64	0.57	0.61	1.67666666666667	0.606666666666667	-1.46662	0.000143571266888655	0.0359487905420742	FBL14	VAI43158.1 unnamed protein product [Triticum turgidum subsp. durum] [Triticum turgidum]
TraesCS4D02G110000	115	52	73	36	12	33	3.47	1.36	2.04	0.92	0.35	0.86	2.29	0.71	-1.68946	0.000144732277484501	0.0360805506745737	ROH1	XP_020183828.1 uncharacterized protein LOC109769506 [Aegilops tauschii subsp. tauschii] [Aegilops tauschii]
TraesCS1B02G403900	20	3	9	0	0	0	1.93	0.25	0.8	0	0	0	0.993333333333334	0.001	-9.95613	0.000149296978208086	0.037055966357556	--	XP_020159365.1 uncharacterized protein LOC109744624 [Aegilops tauschii subsp. tauschii] [Aegilops tauschii]
TraesCS3B02G131200	41	3	41	4	3	0	3.12	0.2	2.89	0.26	0.22	0	2.07	0.16	-3.69349	0.000152179594561226	0.0374873492140965	HSP18	CDM81632.1 unnamed protein product [Triticum aestivum]
TraesCS5A02G327500	256	245	103	635	389	351	18.63	15.39	6.93	38.99	26.79	21.93	13.65	29.2366666666667	1.0988778848511	0.000152354085143983	0.0374873492140965	--	EMS45194.1 hypothetical protein TRIUR3_10731 [Triticum urartu]
TraesCS3B02G132900	58	30	27	15	6	5	3.6	1.61	1.55	0.79	0.35	0.27	2.25333333333333	0.47	-2.26133	0.000154201403889728	0.0378347669162454	--	CDM81655.1 unnamed protein product [Triticum aestivum]
TraesCS2B02G582800	137	85	111	69	32	44	5.9	3.16	4.42	2.51	1.3	1.63	4.49333333333333	1.81333333333333	-1.30914	0.000154431695498103	0.0378347669162454	--	XP_020160723.1 uncharacterized protein LOC109746016 [Aegilops tauschii subsp. tauschii] [Aegilops tauschii]
TraesCS5A02G441700	50	70	10	189	132	107	1.57	1.9	0.29	5	3.92	2.88	1.25333333333333	3.93333333333333	1.64998229257157	0.000155000454250507	0.0378924443824407	XYN1	VAI23352.1 unnamed protein product [Triticum turgidum subsp. durum] [Triticum turgidum]
TraesCS6D02G159200	0	0	0	8	18	5	0	0	0	0.18	0.44	0.11	0.001	0.243333333333333	7.92679015304622	0.000156111234272489	0.0380820960909737	TBL21	XP_020184169.1 protein trichome birefringence-like 19 [Aegilops tauschii subsp. tauschii] [Aegilops tauschii]
TraesCS2B02G273400LC	0	0	0	15	3	15	0	0	0	0.52	0.12	0.53	0.001	0.39	8.60733031374961	0.000159596163396038	0.038765839885409	--	XP_020199025.1 uncharacterized protein LOC109784831 [Aegilops tauschii subsp. tauschii] [Aegilops tauschii]
TraesCS6A02G054900	28	10	27	2	3	3	3.59	1.11	3.21	0.22	0.36	0.33	2.63666666666667	0.303333333333333	-3.11974	0.000159938905148343	0.0387662578263289	--	VAI42266.1 unnamed protein product [Triticum turgidum subsp. durum] [Triticum turgidum]
TraesCS3A02G451500	13	5	2	40	54	20	1.43	0.48	0.2	3.72	5.63	1.89	0.703333333333333	3.74666666666667	2.41332713151374	0.000163360376600286	0.0393438930737092	--	EMS56321.1 hypothetical protein TRIUR3_27568 [Triticum urartu]
TraesCS6D02G060900LC	105	68	79	47	26	32	9.84	5.5	6.85	3.72	2.31	2.58	7.39666666666667	2.87	-1.36582	0.000163798965380031	0.0393661204809848	--	EMS64708.1 hypothetical protein TRIUR3_10854 [Triticum urartu]
TraesCS4D02G166500	10	10	14	37	45	38	0.09	0.08	0.12	0.29	0.4	0.3	0.0966666666666667	0.33	1.77137562495204	0.00016455644797641	0.0394486608820016	APT1	XP_020155021.1 protein ABERRANT POLLEN TRANSMISSION 1-like isoform X1 [Aegilops tauschii subsp. tauschii] [Aegilops tauschii]
TraesCS6B02G346700	175	75	110	68	36	39	11.68	4.33	6.75	3.85	2.27	2.25	7.58666666666667	2.79	-1.4432	0.000164836456969754	0.0394486608820016	HSP24.1	VAI61108.1 unnamed protein product [Triticum turgidum subsp. durum] [Triticum turgidum]
TraesCS3A02G454300	131	67	72	39	32	37	5.98	2.63	3.03	1.5	1.38	1.45	3.88	1.44333333333333	-1.42665	0.000172405655939182	0.0405767241204935	SRC2	VAH68445.1 unnamed protein product [Triticum turgidum subsp. durum] [Triticum turgidum]
TraesCS5B02G164000	0	0	0	13	18	2	0	0	0	1.58	2.44	0.25	0.001	1.42333333333333	10.4750578537867	0.000174170929710132	0.0409074974724352	--	VAI30964.1 unnamed protein product [Triticum turgidum subsp. durum] [Triticum turgidum]
TraesCS5A02G468500	11	19	10	83	48	25	1.04	1.54	0.87	6.6	4.28	2.02	1.15	4.3	1.90270279864509	0.00017652842845739	0.041290580579734	--	VAI23992.1 unnamed protein product [Triticum turgidum subsp. durum] [Triticum turgidum]
TraesCS1A02G165400	4	1	3	29	30	10	0.19	0.04	0.12	1.09	1.24	0.38	0.116666666666667	0.903333333333333	2.9528660244089	0.000177033233600583	0.0413011706869575	TIP3-1	VAH04719.1 unnamed protein product [Triticum turgidum subsp. durum] [Triticum turgidum]
TraesCS3B02G548800	11	7	2	39	31	29	0.54	0.3	0.09	1.62	1.44	1.23	0.31	1.43	2.20567502639151	0.000177300344794772	0.0413011706869575	--	VAH85426.1 unnamed protein product [Triticum turgidum subsp. durum] [Triticum turgidum]
TraesCS2A02G104600	69	5	14	2	1	5	1.55	0.1	0.29	0.04	0.02	0.1	0.646666666666667	0.0533333333333333	-3.59991	0.000178088408697582	0.0413999100930778	--	VAH26406.1 unnamed protein product [Triticum turgidum subsp. durum] [Triticum turgidum]
TraesCS4B02G297100	82	33	34	13	16	11	5.09	1.77	1.95	0.68	0.94	0.59	2.93666666666667	0.736666666666667	-1.9951	0.000178526894692366	0.0414171465468248	TIFY11B	VAI09551.1 unnamed protein product [Triticum turgidum subsp. durum] [Triticum turgidum]
TraesCS6D02G285000	124	50	86	38	25	35	3.25	1.13	2.09	0.84	0.62	0.79	2.15666666666667	0.75	-1.52384	0.000181468077933304	0.0419283469415126	At3g28850	XP_020172560.1 uncharacterized protein At5g39865-like [Aegilops tauschii subsp. tauschii] [Aegilops tauschii]
TraesCS5A02G253700	138	91	111	73	28	46	16.86	9.6	12.54	7.56	3.24	4.87	13	5.22333333333333	-1.31547	0.000182510948125341	0.0420837668357898	XERICO	XP_020176248.1 probable E3 ubiquitin-protein ligase XERICO [Aegilops tauschii subsp. tauschii] [Aegilops tauschii]
TraesCS6A02G354600	3	5	10	45	19	30	0.06	0.08	0.18	0.72	0.34	0.49	0.106666666666667	0.516666666666667	2.27612440527423	0.000183685051493425	0.0422687562725062	--	VAI50627.1 unnamed protein product [Triticum turgidum subsp. durum] [Triticum turgidum]
TraesCS1D02G402500	66	34	64	20	19	15	2.08	0.92	1.86	0.53	0.55	0.41	1.62	0.496666666666667	-1.70564	0.000184068577121345	0.0422714416998448	CIN1	XP_020196755.1 beta-fructofuranosidase, insoluble isoenzyme 1-like [Aegilops tauschii subsp. tauschii] [Aegilops tauschii]
TraesCS3D02G102800	23	19	11	102	40	44	1.86	1.33	0.82	6.97	3.06	3.06	1.33666666666667	4.36333333333333	1.70679095549032	0.000192309721291249	0.0438979762795688	--	XP_020191984.1 uncharacterized protein LOC109777836 [Aegilops tauschii subsp. tauschii] [Aegilops tauschii]
TraesCS2A02G417300	138	106	142	69	63	68	5.44	3.61	5.18	2.28	2.35	2.31	4.74333333333333	2.31333333333333	-1.03593	0.000193049750968033	0.0439399889221474	ERF1A	VAH35539.1 unnamed protein product [Triticum turgidum subsp. durum] [Triticum turgidum]
TraesCS1D02G418400	41	11	43	4	5	8	2.16	0.5	2.1	0.18	0.25	0.36	1.58666666666667	0.263333333333333	-2.59104	0.000193266839035809	0.0439399889221474	WRKY53	XP_020196714.1 probable WRKY transcription factor 72 [Aegilops tauschii subsp. tauschii] [Aegilops tauschii]
TraesCS6D02G322300	78	11	34	8	9	5	5.28	0.64	2.13	0.46	0.58	0.29	2.68333333333333	0.443333333333333	-2.59756	0.00019729237589092	0.0445876847199844	HSP18.6	XP_020181941.1 18.6 kDa class III heat shock protein-like [Aegilops tauschii subsp. tauschii] [Aegilops tauschii]
TraesCS1A02G370600	22	5	4	0	0	0	1.06	0.21	0.18	0	0	0	0.483333333333333	0.001	-8.91687	0.000201714986638937	0.0452275237399496	ERF109	VAH11082.1 unnamed protein product [Triticum turgidum subsp. durum] [Triticum turgidum]
TraesCS3A02G139300	182	116	127	69	71	71	6.2	3.41	4	1.98	2.29	2.08	4.53666666666667	2.11666666666667	-1.09984	0.000202887160237454	0.0454007947132147	BBX22	VAH58746.1 unnamed protein product [Triticum turgidum subsp. durum] [Triticum turgidum]
TraesCS3B02G362700	2	8	6	25	24	34	0.09	0.31	0.25	0.95	1.02	1.31	0.216666666666667	1.09333333333333	2.33518419158962	0.000205870004007558	0.0458876165599357	CTPA2	VAI35816.1 unnamed protein product [Triticum turgidum subsp. durum] [Triticum turgidum]
TraesCS7D02G119900	3	8	1	33	15	32	0.08	0.22	0.03	0.88	0.45	0.86	0.11	0.73	2.73039294024272	0.000206452781827501	0.0459274616043148	NPF2.3	XP_020182564.1 protein NRT1/ PTR FAMILY 2.3-like [Aegilops tauschii subsp. tauschii] [Aegilops tauschii]
TraesCS2A02G578500	35	14	24	70	97	55	3.57	1.24	2.25	6.05	9.42	4.87	2.35333333333333	6.78	1.52657959058632	0.000211534379598965	0.0467265635155919	--	XP_020180285.1 cysteine proteinase inhibitor 6-like [Aegilops tauschii subsp. tauschii] [Aegilops tauschii]
MSTRG.57240	12	27	9	33	55	87	0.27	0.53	0.19	0.64	1.19	1.71	0.33	1.18	1.83824893000339	0.000213744614851631	0.0470534185877509	--	NHL domain-containing protein [Zea mays]
TraesCS7D02G489900	87	37	22	192	170	93	3.34	1.23	0.78	6.22	6.17	3.06	1.78333333333333	5.15	1.52999604150323	0.000213997707626584	0.0470534185877509	APF2	XP_020147476.1 aspartyl protease family protein 2-like [Aegilops tauschii subsp. tauschii] [Aegilops tauschii]
TraesCS2D02G452600	74	42	25	204	131	80	8.15	3.99	2.55	18.96	13.66	7.57	4.89666666666667	13.3966666666667	1.45200218150247	0.000216796850948393	0.0474459780678038	--	SPT19903.1 unnamed protein product [Triticum aestivum]
TraesCS7A02G195800	59	21	31	14	0	4	2.56	0.79	1.24	0.51	0	0.15	1.53	0.22	-2.79796	0.000217035183856523	0.0474459780678038	2MMP	VAI72535.1 unnamed protein product [Triticum turgidum subsp. durum] [Triticum turgidum]
TraesCS3D02G444300	43	25	10	133	85	53	4.31	2.16	0.93	11.25	8.07	4.56	2.46666666666667	7.96	1.69020566074849	0.000218647341831589	0.047615275627183	--	XP_020164226.1 major pollen allergen Art v 1-like [Aegilops tauschii subsp. tauschii] [Aegilops tauschii]
TraesCS4A02G304100	0	0	0	22	5	5	0	0	0	1.22	0.34	0.3	0.001	0.62	9.27612440527424	0.000222480567041269	0.0483574061559279	AHP2	BAK05772.1 predicted protein [Hordeum vulgare subsp. vulgare] [Hordeum vulgare]
TraesCS1D02G146600	53	74	32	95	164	128	0.9	1.09	0.51	1.36	2.64	1.87	0.833333333333333	1.95666666666667	1.23143240844797	0.000224987901608767	0.0487160946498664	CESA7	XP_020198383.1 cellulose synthase A catalytic subunit 7 [UDP-forming] [Aegilops tauschii subsp. tauschii] [Aegilops tauschii]

## Sheet: Sheet4
List of differentially expressed genes of 9 DAP embryo.
id	Fielder-9DAP-1_count	Fielder-9DAP-2_count	Fielder-9DAP-3_count	amiR-BBM-9DAP-1_count	amiR-BBM-9DAP-2_count	amiR-BBM-9DAP-3_count	Fielder-9DAP-1_fpkm	Fielder-9DAP-2_fpkm	Fielder-9DAP-3_fpkm	amiR-BBM-9DAP-1_fpkm	amiR-BBM-9DAP-2_fpkm	amiR-BBM-9DAP-3_fpkm	Fielder-9DAP_mean	amiR-BBM-9DAP_mean	log2(fc)	PValue	FDR	Symbol	Description
TraesCS2D02G033200	72	73	89	1829	2363	2005	1.67	1.51	1.75	38.62	53.78	46.56	1.64333333333333	46.32	4.81693820233248	1.60181263586227e-241	1.87447318273875e-236	HSP82	XP_020152903.1 heat shock protein 83 [Aegilops tauschii subsp. tauschii] [Aegilops tauschii]
TraesCS3B02G288900	282	316	284	2816	3151	2524	4.1	4.33	3.68	38.41	46.81	37.98	4.03666666666667	41.0666666666667	3.34673148588793	8.27433032721412e-209	4.84139341775626e-204	DDB_G0289029	VAH78631.1 unnamed protein product [Triticum turgidum subsp. durum] [Triticum turgidum]
TraesCS1B02G294300	1721	1700	1928	7424	7665	7792	39.1	36.45	39.18	158.37	178.22	183.46	38.2433333333333	173.35	2.18040765565429	8.69472623383928e-205	3.39158084445447e-200	HSP70-4	XP_020159806.1 probable mediator of RNA polymerase II transcription subunit 37c [Aegilops tauschii subsp. tauschii] [Aegilops tauschii]
TraesCS3B02G284600	207	199	209	1656	1739	1515	3.57	3.25	3.23	26.82	30.71	27.08	3.35	28.2033333333333	3.07363268319184	6.97296692142585e-177	2.03997633769774e-172	DDB_G0289029	CDM83721.1 unnamed protein product [Triticum aestivum]
TraesCS3A02G252800	208	166	201	1648	1678	1494	3.56	2.69	3.08	26.53	29.44	26.54	3.11	27.5033333333333	3.14461999469749	6.47207598208945e-168	1.51475055115214e-163	DDB_G0289029	VAH62715.1 unnamed protein product [Triticum turgidum subsp. durum] [Triticum turgidum]
TraesCS2A02G033700	107	134	110	1387	1838	1493	2.17	2.57	2	26.5	38.27	31.48	2.24666666666667	32.0833333333333	3.83596604417513	9.12542771798169e-159	1.77979300402276e-154	HSP83A	ADF31754.1 heat shock protein 90 [Triticum aestivum]
TraesCS5D02G425800	455	379	399	3365	2969	2561	16.39	12.89	12.86	113.86	109.5	95.64	14.0466666666667	106.333333333333	2.92029420472228	9.30297385990488e-158	1.55521801004827e-153	WZCI	XP_020178252.1 serpin-Z2B [Aegilops tauschii subsp. tauschii] [Aegilops tauschii]
TraesCS5A02G468300	178	152	257	2028	1876	1638	6.87	5.54	8.88	73.55	74.16	65.55	7.09666666666667	71.0866666666667	3.32436553781144	2.58819612179285e-150	3.78594858205554e-146	NAC002	AAU08786.1 NAC domain transcription factor [Triticum aestivum]
TraesCS5B02G480900	158	150	206	1366	1609	1366	5.99	5.37	6.99	48.66	62.54	53.69	6.11666666666667	54.9633333333333	3.16765193885458	1.68672485227844e-141	2.19315461848142e-137	NAC002	ADE59446.1 NAC transcription factor 2B [Triticum aestivum]
TraesCS4B02G212200	153	171	196	1108	1207	1083	8.8	9.32	10.1	59.95	71.19	64.63	9.40666666666667	65.2566666666667	2.79436980873108	4.0744793712333e-127	4.76803724980463e-123	HSP17.9A	VAI07380.1 unnamed protein product [Triticum turgidum subsp. durum] [Triticum turgidum]
TraesCS3D02G351900	25	33	42	645	707	688	0.56	0.72	0.85	13.79	16.48	16.24	0.71	15.5033333333333	4.44861560429877	4.90086621654944e-125	5.21371969448226e-121	HSP70	VAH81631.1 unnamed protein product [Triticum turgidum subsp. durum] [Triticum turgidum]
TraesCS1B02G352400	760	718	697	2965	2977	2837	13.22	11.79	10.85	48.43	52.98	51.14	11.9533333333333	50.85	2.08883478659765	7.48744271549022e-125	7.30162934543413e-121	CLPB1	VAH21268.1 unnamed protein product [Triticum turgidum subsp. durum] [Triticum turgidum]
TraesCS2D02G276000	170	211	195	1416	2016	1723	4.05	4.74	4.15	31.67	49.13	42.51	4.31333333333333	41.1033333333333	3.25238027945022	1.48644281336981e-123	1.33805008389355e-119	FKBP65	XP_020158971.1 70 kDa peptidyl-prolyl isomerase-like [Aegilops tauschii subsp. tauschii] [Aegilops tauschii]
TraesCS1A02G285000	2459	2328	2755	8003	8655	8698	59.26	52.95	59.41	181.09	213.48	217.23	57.2066666666667	203.933333333333	1.83384241758146	2.15920553609132e-123	1.80481821603199e-119	HSP70-4	EMS68426.1 Heat shock cognate 70 kDa protein 4 [Triticum urartu]
TraesCS2B02G294500	341	401	448	2030	2565	2236	8.24	9.14	9.68	46.05	63.43	55.98	9.02	55.1533333333333	2.61224874283796	4.0090788686223e-122	3.12766951575946e-118	FKBP70	XP_020158971.1 70 kDa peptidyl-prolyl isomerase-like [Aegilops tauschii subsp. tauschii] [Aegilops tauschii]
TraesCS3D02G253500	259	211	224	1666	1710	1374	3.79	2.95	2.89	23.61	25.3	21.13	3.21	23.3466666666667	2.8625713805901	2.56523134047249e-120	1.87617813702982e-116	DDB_G0289029	XP_020147550.1 uncharacterized protein LOC109732770 [Aegilops tauschii subsp. tauschii] [Aegilops tauschii]
TraesCS3A02G274400	41	57	62	733	1023	907	0.72	0.94	0.98	12.15	18.49	16.59	0.88	15.7433333333333	4.16109370079211	5.27775168069162e-120	3.63301798339938e-116	CLPB1	VAH63442.1 unnamed protein product [Triticum turgidum subsp. durum] [Triticum turgidum]
TraesCS1D02G342100	306	251	279	1558	1798	1676	5.37	4.16	4.38	25.65	32.26	30.45	4.63666666666667	29.4533333333333	2.66727099881303	4.78889124618855e-119	3.11336461895265e-115	CLPB1	XP_020155730.1 chaperone protein ClpB1 [Aegilops tauschii subsp. tauschii] [Aegilops tauschii]
TraesCS5D02G481200	189	182	308	1847	1777	1531	6.93	6.3	10.11	63.61	66.7	58.19	7.78	62.8333333333333	3.01368805733604	5.86936097272725e-117	3.61497031447625e-113	NAC002	ADE59447.1 NAC transcription factor 2D [Triticum aestivum]
TraesCS1B02G122800	19	23	29	652	775	613	0.44	0.5	0.6	14.06	18.21	14.58	0.513333333333333	15.6166666666667	4.92704679185165	2.25414279167499e-116	1.31892148883695e-112	PAL	VAH14663.1 unnamed protein product [Triticum turgidum subsp. durum] [Triticum turgidum]
TraesCS2A02G277100	80	88	113	840	1209	1040	2.01	2.09	2.54	19.82	31.1	27.08	2.21333333333333	26	3.55421897729005	4.37396305192948e-108	2.43738049648996e-104	FKBP70	VAH31591.1 unnamed protein product [Triticum turgidum subsp. durum] [Triticum turgidum]
TraesCS3B02G208300	175	162	223	1155	1225	1032	3.86	3.38	4.4	23.91	27.64	23.57	3.88	25.04	2.69010600474549	1.19598606224881e-107	6.36166731711273e-104	NAC074	CDM82678.1 unnamed protein product [Triticum aestivum]
TraesCS1D02G284000	3265	3190	3604	9086	9735	9512	71.35	65.8	70.48	186.47	217.76	215.46	69.21	206.563333333333	1.57753177700621	2.38300960797497e-107	1.21245456671499e-103	HSP70-4	XP_020159806.1 probable mediator of RNA polymerase II transcription subunit 37c [Aegilops tauschii subsp. tauschii] [Aegilops tauschii]
TraesCS1A02G375600	281	314	446	1755	1825	1763	7.83	8.3	11.12	46.02	52.17	51.06	9.08333333333333	49.75	2.45340279648788	2.6636635438539e-106	1.29878014678696e-102	HSFA2C	AND74686.1 heat shock transcription factor A6e [Triticum aestivum]
TraesCS1D02G122600	99	95	165	1136	1186	901	3.5	3.16	5.21	37.77	42.97	33.06	3.95666666666667	37.9333333333333	3.26110871755204	5.64641399841551e-99	2.64301863569032e-95	--	GER37128.1 cadherin-8 [Striga asiatica]
TraesCS1D02G382900	122	141	159	787	776	782	4.5	4.89	5.22	27.19	29.2	29.78	4.87	28.7233333333333	2.56022950573856	1.30723696378907e-97	5.88367246063556e-94	HSFA2C	XP_020147339.1 heat stress transcription factor A-2c-like isoform X2 [Aegilops tauschii subsp. tauschii] [Aegilops tauschii]
TraesCS7B02G168300	86	94	106	720	648	611	2.32	2.4	2.54	18.14	17.78	16.98	2.42	17.6333333333333	2.86522626900563	4.00017858386463e-96	1.73373666015188e-92	HSFB2B	VAI86685.1 unnamed protein product [Triticum turgidum subsp. durum] [Triticum turgidum]
TraesCS4A02G097900	1040	931	1297	3920	4292	3933	25.11	21.2	28	88.15	107.01	99.41	24.77	98.19	1.98698223451956	2.01229085093798e-95	8.41008214137371e-92	HSP70	VAH89366.1 unnamed protein product [Triticum turgidum subsp. durum] [Triticum turgidum]
TraesCS4A02G117100	193	204	213	1048	1099	916	4.11	4.1	4.07	21	24	20.26	4.09333333333333	21.7533333333333	2.40988842672168	3.65246484480725e-95	1.47385772782426e-91	COBL7	VAH90049.1 unnamed protein product [Triticum turgidum subsp. durum] [Triticum turgidum]
TraesCS1A02G255400	192	192	217	1235	1275	942	4.55	4.28	4.58	27.42	30.85	23.08	4.47	27.1166666666667	2.60083310865542	4.47296071972888e-92	1.74478269781371e-88	lip	VAH07335.1 unnamed protein product [Triticum turgidum subsp. durum] [Triticum turgidum]
TraesCS3D02G183900	156	151	180	1078	1198	865	4.42	3.99	4.54	28.82	34.73	25.46	4.31666666666667	29.67	2.78101532962751	5.4728587831122e-92	2.06595122747534e-88	NAC074	VAH75804.1 unnamed protein product [Triticum turgidum subsp. durum] [Triticum turgidum]
TraesCS3A02G537700	142	106	173	908	1064	957	4.53	3.19	4.95	27.21	34.77	31.66	4.22333333333333	31.2133333333333	2.8857084099712	1.53117815973171e-91	5.59942283150389e-88	At3g55980	VAH70456.1 unnamed protein product [Triticum turgidum subsp. durum] [Triticum turgidum]
TraesCS1D02G335400	67	49	64	1110	876	597	0.76	0.52	0.65	11.81	10.16	7.01	0.643333333333333	9.66	3.90838484228885	8.13479940345816e-91	2.8846984720954e-87	ACA7	XP_020165377.1 putative calcium-transporting ATPase 13, plasma membrane-type [Aegilops tauschii subsp. tauschii] [Aegilops tauschii]
TraesCS1A02G340100	179	215	219	983	1210	1049	3.25	3.69	3.57	16.81	22.56	19.79	3.50333333333333	19.72	2.49285938313689	1.52990358368488e-89	5.26565815205799e-86	CLPB1	AAC83689.2 101 kDa heat shock protein [Triticum aestivum]
TraesCS6B02G342200	132	160	188	908	910	780	2.38	2.72	3.02	15.34	16.75	14.53	2.70666666666667	15.54	2.52139737194369	2.8196911760519e-89	9.42759716582701e-86	FH16	VAI60977.1 unnamed protein product [Triticum turgidum subsp. durum] [Triticum turgidum]
TraesCS7D02G270600	29	35	38	486	469	425	0.96	1.07	1.21	15.78	16.31	14.98	1.08	15.69	3.86074213480463	3.11414826116296e-89	1.01228849393837e-85	HSFB2B	XP_020197754.1 heat stress transcription factor B-2b-like [Aegilops tauschii subsp. tauschii] [Aegilops tauschii]
TraesCS2A02G214400	195	179	218	1038	1026	858	5.59	4.86	5.6	28.02	30.2	25.59	5.35	27.9366666666667	2.38454909561859	9.28716984075575e-88	2.93730591649978e-84	CIGR1	VAH29280.1 unnamed protein product [Triticum turgidum subsp. durum] [Triticum turgidum]
TraesCS4B02G211700	37	31	65	539	676	593	2.56	2.02	3.99	34.96	47.8	42.46	2.85666666666667	41.74	3.86902599176849	1.25323778608633e-87	3.85937874219458e-84	HSP17.4	VAI07382.1 unnamed protein product [Triticum turgidum subsp. durum] [Triticum turgidum]
TraesCS3B02G390700	207	205	194	1074	1451	1176	4.9	4.59	4.12	23.91	35.22	28.91	4.53666666666667	29.3466666666667	2.69349207838756	1.35265944893213e-87	4.05874138545989e-84	HSP70	VAH81626.1 unnamed protein product [Triticum turgidum subsp. durum] [Triticum turgidum]
TraesCS2B02G047400	6	7	9	606	826	679	0.11	0.13	0.16	11.22	16.65	13.86	0.133333333333333	13.91	6.70494111037604	2.19032975782981e-87	6.40791922301899e-84	HSP82	ADF31755.1 heat shock protein 90 [Triticum aestivum]
TraesCS2D02G204700	34	45	51	497	618	493	0.72	0.9	0.97	9.92	13.46	10.86	0.863333333333333	11.4133333333333	3.72465869871459	2.07252767105013e-86	5.9153983688202e-83	PAL	XP_020166500.1 phenylalanine ammonia-lyase-like [Aegilops tauschii subsp. tauschii] [Aegilops tauschii]
TraesCS5B02G193100	65	44	69	724	713	513	2.36	1.51	2.22	24.64	26.45	19.26	2.03	23.45	3.53003629021756	1.00192588464927e-84	2.79160406841494e-81	TPP7	VAI31979.1 unnamed protein product [Triticum turgidum subsp. durum] [Triticum turgidum]
TraesCS6B02G175100	28	23	44	452	469	421	0.87	0.68	1.23	13.23	14.96	13.59	0.926666666666667	13.9266666666667	3.9096557043436	1.43462052564001e-82	3.9042363523592e-79	WRKY71	VAI56034.1 unnamed protein product [Triticum turgidum subsp. durum] [Triticum turgidum]
TraesCS3A02G209100	157	125	171	815	852	757	5.63	4.25	5.49	27.48	31.33	28.17	5.12333333333333	28.9933333333333	2.5005665437733	1.26244245961037e-81	3.35758048883012e-78	--	VAH61281.1 unnamed protein product [Triticum turgidum subsp. durum] [Triticum turgidum]
TraesCS4D02G195600	53	32	33	565	560	442	1.47	0.84	0.82	14.57	15.74	12.59	1.04333333333333	14.3	3.77674308545429	3.78542378178595e-81	9.84395248427012e-78	FAD7	XP_020192889.1 omega-3 fatty acid desaturase, endoplasmic reticulum-like [Aegilops tauschii subsp. tauschii] [Aegilops tauschii]
TraesCS6D02G136200	21	11	21	510	524	370	0.59	0.29	0.53	13.46	15.08	10.79	0.47	13.11	4.80186311854412	1.04142620051597e-80	2.64934297471261e-77	WRKY71	XP_020192814.1 WRKY transcription factor WRKY71-like [Aegilops tauschii subsp. tauschii] [Aegilops tauschii]
TraesCS7D02G403700	377	402	441	1495	1404	1233	9.76	9.82	10.22	36.33	37.18	33.07	9.93333333333333	35.5266666666667	1.83855250241051	2.09978840093218e-80	5.22811570752949e-77	MPK12	AAX20165.1 putative MAPK protein kinase [Triticum aestivum]
TraesCS3A02G176500	194	212	299	1194	1423	1121	4.92	5.07	6.77	28.4	36.9	29.42	5.58666666666667	31.5733333333333	2.4986469319296	1.73231796795247e-79	4.22331902595279e-76	NAC074	VAH59867.1 unnamed protein product [Triticum turgidum subsp. durum] [Triticum turgidum]
TraesCS5B02G428000	795	829	1035	2587	2900	2702	27.32	26.9	31.84	83.51	102.04	96.27	28.6866666666667	93.94	1.71135925403063	6.81262906637657e-79	1.62699485429698e-75	ATJ3	XP_020156323.1 dnaJ protein homolog [Aegilops tauschii subsp. tauschii] [Aegilops tauschii]
TraesCS3B02G239400	159	117	212	1002	1047	913	4.6	3.2	5.49	27.26	31.05	27.42	4.43	28.5766666666667	2.68945903878533	1.61738030261761e-78	3.78538155545835e-75	--	VAH77117.1 unnamed protein product [Triticum turgidum subsp. durum] [Triticum turgidum]
TraesCS3A02G360300	63	68	96	576	652	531	1.53	1.56	2.08	13.12	16.18	13.35	1.72333333333333	14.2166666666667	3.04430955589072	1.92800524490871e-78	4.42390254450407e-75	SCL14	VAH66275.1 unnamed protein product [Triticum turgidum subsp. durum] [Triticum turgidum]
TraesCS5D02G200800	138	142	157	792	889	691	4.72	4.57	4.8	25.43	31.12	24.5	4.69666666666667	27.0166666666667	2.52414057409527	5.90559543072158e-78	1.32900882402673e-74	TPP7	XP_020190227.1 probable trehalose-phosphate phosphatase 7 [Aegilops tauschii subsp. tauschii] [Aegilops tauschii]
TraesCS2A02G156800	111	121	145	710	592	626	6.99	7.09	8.04	41.49	38.11	40.19	7.37333333333333	39.93	2.4370841871195	3.87949908660406e-77	8.56578758702982e-74	MPSR1	VAH27709.1 unnamed protein product [Triticum turgidum subsp. durum] [Triticum turgidum]
TraesCS1B02G396000	114	166	214	911	875	873	6.23	7.45	10	45.7	47.62	48.2	7.89333333333333	47.1733333333333	2.57926496706151	1.09845305028842e-76	2.38042912686762e-73	HSFA2C	VAH22318.1 unnamed protein product [Triticum turgidum subsp. durum] [Triticum turgidum]
TraesCS5D02G434100	1109	1214	1329	3169	3660	3434	35.14	36.31	37.68	94.3	118.7	112.78	36.3766666666667	108.593333333333	1.57785028270756	1.23716246514137e-76	2.6322768362868e-73	ATJ3	XP_020156323.1 dnaJ protein homolog [Aegilops tauschii subsp. tauschii] [Aegilops tauschii]
TraesCS3D02G212000	72	71	133	816	833	639	2.59	2.41	4.3	27.59	30.69	23.82	3.1	27.3666666666667	3.14207960066978	1.859483770703e-75	3.88572338955726e-72	--	XP_020174300.1 protein ANTAGONIST OF LIKE HETEROCHROMATIN PROTEIN 1-like [Aegilops tauschii subsp. tauschii] [Aegilops tauschii]
TraesCS1A02G332800	41	48	46	813	647	420	0.64	0.71	0.64	11.92	10.35	6.8	0.663333333333333	9.69	3.86869073559259	2.13195282332813e-75	4.37693654897377e-72	ACA7	VAH09234.1 unnamed protein product [Triticum turgidum subsp. durum] [Triticum turgidum]
TraesCS6D02G295500	37	20	43	471	485	391	2.18	1.11	2.26	26.28	29.5	24.14	1.85	26.64	3.84799690655495	2.67733772170065e-75	5.40185198049748e-72	HSP24.1	XP_020154915.1 24.1 kDa heat shock protein, mitochondrial-like isoform X1 [Aegilops tauschii subsp. tauschii] [Aegilops tauschii]
TraesCS7A02G270100	60	62	92	500	503	516	2.08	2.07	2.82	16.51	17.96	18.57	2.32333333333333	17.68	2.92785021424417	3.51703032332349e-74	6.97576139823663e-71	HSFB2B	AJR10106.1 heat-responsive transcription factor [Triticum aestivum]
TraesCS3D02G273600	10	6	7	413	591	530	0.17	0.11	0.11	6.77	10.6	9.63	0.13	9	6.11334147307594	1.06752930702715e-73	2.08207357611552e-70	CLPB1	XP_020172832.1 chaperone protein ClpB1-like [Aegilops tauschii subsp. tauschii] [Aegilops tauschii]
TraesCS6A02G146900	18	27	35	410	403	342	0.54	0.76	0.93	11.48	12.3	10.57	0.743333333333333	11.45	3.94519448378516	4.46797269189454e-73	8.57132951394889e-70	WRKY71	AFW98256.1 WRKY80 transcription factor [Triticum aestivum]
TraesCS4B02G187300	162	110	188	895	892	787	4.65	2.98	4.83	24.14	26.22	23.41	4.15333333333333	24.59	2.56573016729324	1.51467596940777e-71	2.85887760148445e-68	COBL7	XP_020199365.1 COBRA-like protein 7 [Aegilops tauschii subsp. tauschii] [Aegilops tauschii]
TraesCS2A02G189600	102	126	119	721	662	545	2.54	2.96	2.65	16.87	16.89	14.08	2.71666666666667	15.9466666666667	2.55334542507967	3.541987447349e-71	6.57921357243928e-68	CIGR2	VAH28547.1 unnamed protein product [Triticum turgidum subsp. durum] [Triticum turgidum]
TraesCS6B02G346700	23	24	35	390	392	330	1.47	1.44	1.99	23.28	25.52	21.81	1.63333333333333	23.5366666666667	3.84901886242463	5.59674782651034e-71	1.01785038120609e-67	HSP24.1	VAI61108.1 unnamed protein product [Triticum turgidum subsp. durum] [Triticum turgidum]
TraesCS3D02G352400	13	15	10	918	1347	883	0.32	0.33	0.22	20.57	32.89	21.82	0.29	25.0933333333333	6.43510741687981	5.6536612584297e-71	1.01785038120609e-67	HSP70	XP_020165957.1 heat shock cognate 70 kDa protein [Aegilops tauschii subsp. tauschii] [Aegilops tauschii]
TraesCS4D02G188600	191	145	228	999	976	826	4.15	2.98	4.44	20.4	21.72	18.62	3.85666666666667	20.2466666666667	2.39225804405997	8.91119270007044e-71	1.58000847295097e-67	COBL7	XP_020199365.1 COBRA-like protein 7 [Aegilops tauschii subsp. tauschii] [Aegilops tauschii]
TraesCS3B02G894800LC	173	129	237	940	1050	1036	4.96	3.49	6.07	25.32	30.82	30.8	4.84	28.98	2.58197864228233	9.24714226840292e-71	1.61510310825828e-67	At3g55980	AFS49947.1 ZnFP [Triticum aestivum]
TraesCS4D02G207500	1822	1588	1953	4941	5900	5380	41.78	34.38	40.08	106.41	138.49	127.88	38.7466666666667	124.26	1.68121785202998	1.6029354884391e-70	2.75851054011941e-67	HSP70	XP_020177775.1 heat shock cognate 70 kDa protein 2-like [Aegilops tauschii subsp. tauschii] [Aegilops tauschii]
TraesCS6D02G393700	25	40	49	379	414	427	0.99	1.49	1.73	14.05	16.72	17.47	1.40333333333333	16.08	3.51833776883369	2.83539462619707e-70	4.80874710067875e-67	--	XP_020173374.1 uncharacterized protein LOC109758922 [Aegilops tauschii subsp. tauschii] [Aegilops tauschii]
TraesCS4A02G046800	195	176	205	786	829	742	2.92	2.48	2.74	10.97	12.68	11.47	2.71333333333333	11.7066666666667	2.10919214526912	3.72661302224602e-69	6.22993870127533e-66	ACA10	VAH87896.1 unnamed protein product [Triticum turgidum subsp. durum] [Triticum turgidum]
TraesCS1B02G197000	27	15	21	392	371	312	0.98	0.51	0.68	13.38	13.81	11.75	0.723333333333333	12.98	4.16548593627582	6.82456686864709e-69	1.12482318887721e-65	--	XP_020176368.1 uncharacterized protein LOC109761971 [Aegilops tauschii subsp. tauschii] [Aegilops tauschii]
TraesCS2D02G198200	139	132	206	899	830	705	3.59	3.23	4.77	21.86	22.01	18.93	3.86333333333333	20.9333333333333	2.43788399277252	4.96106113672738e-68	8.06324022697377e-65	CIGR2	XP_020176499.1 chitin-inducible gibberellin-responsive protein 2-like [Aegilops tauschii subsp. tauschii] [Aegilops tauschii]
TraesCS2D02G079200	84	96	86	588	538	461	2.88	3.11	2.64	18.95	18.88	16.4	2.87666666666667	18.0766666666667	2.65165870583626	5.3378764658118e-68	8.55683533948258e-65	PBL27	XP_020175940.1 probable serine/threonine-protein kinase PBL7 [Aegilops tauschii subsp. tauschii] [Aegilops tauschii]
TraesCS3B02G379200	13	17	24	353	343	303	0.34	0.42	0.57	8.74	9.26	8.28	0.443333333333333	8.76	4.30446712482114	1.19809079595267e-67	1.8946348800537e-64	WRKY24	VAH81332.1 unnamed protein product [Triticum turgidum subsp. durum] [Triticum turgidum]
TraesCS5A02G548000	281	333	347	1245	1762	1353	3.49	4.18	4.16	14.46	22.31	17.33	3.94333333333333	18.0333333333333	2.19317852037439	7.22664671569767e-67	1.12756886928583e-63	BAG6	VAI25896.1 unnamed protein product [Triticum turgidum subsp. durum] [Triticum turgidum]
TraesCS7A02G410700	126	153	158	793	641	601	3.36	3.72	3.96	20.56	17.47	16.55	3.68	18.1933333333333	2.30563222249597	1.21878066188027e-66	1.8766335607178e-63	MPK12	ABC54587.1 mitogen-activated protein kinase [Triticum aestivum]
TraesCS7A02G242200	2577	2551	2863	6187	7081	7496	58	54.2	57.68	130.8	163.17	174.91	56.6266666666667	156.293333333333	1.46470272865129	2.51647576457389e-66	3.82445489509046e-63	HSP81-1	EMS59444.1 Heat shock protein 81-3 [Triticum urartu]
TraesCS5A02G359700	131	94	116	892	780	584	5.24	3.53	4.15	33.45	31.91	24.19	4.30666666666667	29.85	2.7930873621794	2.57140219401163e-66	3.85782855830293e-63	WZCI	Q9ST58.1 RecName: Full=Serpin-Z1C; AltName: Full=TriaeZ1c; AltName: Full=WSZ1c [Triticum aestivum]
TraesCS2D02G204400	23	25	34	324	342	340	0.66	0.69	0.87	8.73	10.02	10.09	0.74	9.61333333333333	3.69943958289072	6.55966337355667e-66	9.71677123164998e-63	PAL	XP_020166493.1 phenylalanine ammonia-lyase-like [Aegilops tauschii subsp. tauschii] [Aegilops tauschii]
TraesCS3D02G446700	267	189	257	1558	1332	997	9.88	6.58	8.5	54.32	50.39	38.2	8.32	47.6366666666667	2.51741703195397	7.96465764877283e-66	1.16505020921837e-62	SRC2	VAH84309.1 unnamed protein product [Triticum turgidum subsp. durum] [Triticum turgidum]
TraesCS7D02G358000	15	11	23	337	327	301	1.21	0.84	1.66	25.47	26.94	25.11	1.23666666666667	25.84	4.38507747879427	1.26457569661967e-65	1.82695280456577e-62	--	-
TraesCS5D02G329100	51	33	54	406	436	382	1.43	0.89	1.37	10.81	12.63	11.22	1.23	11.5533333333333	3.23157893309977	3.10650981274066e-65	4.433292576909e-62	PBL19	XP_020163706.1 probable serine/threonine-protein kinase PBL19 [Aegilops tauschii subsp. tauschii] [Aegilops tauschii]
TraesCS2A02G199700	154	156	195	746	768	644	3.61	3.45	4.11	16.46	18.47	15.69	3.72333333333333	16.8733333333333	2.18007832162737	5.110091154435e-65	7.2047359888469e-62	CPK20	XP_020168962.1 calcium-dependent protein kinase 20 [Aegilops tauschii subsp. tauschii] [Aegilops tauschii]
TraesCS5A02G426100	1284	1284	1521	3179	3492	3578	40.68	38.39	43.13	94.58	113.24	117.5	40.7333333333333	108.44	1.41261523385278	5.1930087641449e-65	7.23447942378291e-62	ATJ3	VAI22912.1 unnamed protein product [Triticum turgidum subsp. durum] [Triticum turgidum]
TraesCS6D02G129900	40	30	52	433	379	345	1.16	0.84	1.35	11.86	11.34	10.45	1.11666666666667	11.2166666666667	3.32837350415254	7.24325258621153e-65	9.97199887227818e-62	CRPK1	XP_020156576.1 putative serine/threonine-protein kinase [Aegilops tauschii subsp. tauschii] [Aegilops tauschii]
TraesCS2D02G104300	23	9	28	383	409	310	0.42	0.16	0.46	6.59	7.67	5.89	0.346666666666667	6.71666666666667	4.27612440527424	8.94596044952534e-65	1.21729556247018e-61	--	XP_020186131.1 flocculation protein FLO11-like [Aegilops tauschii subsp. tauschii] [Aegilops tauschii]
TraesCS7D02G161900	83	71	80	543	501	423	1.15	0.96	1.13	7.39	7.3	6.08	1.08	6.92333333333333	2.68043549796002	1.11268620789496e-64	1.49665247609522e-61	ARF16	XP_020149526.1 auxin response factor 16 [Aegilops tauschii subsp. tauschii] [Aegilops tauschii]
TraesCS1D02G073100	22	33	41	455	421	310	0.41	0.58	0.68	7.92	7.98	5.96	0.556666666666667	7.28666666666667	3.71037339319785	1.55735429571474e-64	2.07096266355829e-61	CCR3	XP_020151403.1 putative serine/threonine-protein kinase-like protein CCR3 [Aegilops tauschii subsp. tauschii] [Aegilops tauschii]
TraesCS7B02G065800	127	139	138	755	781	568	1.94	1.95	1.76	10.43	11.62	8.66	1.88333333333333	10.2366666666667	2.44238573967333	1.64436190814917e-64	2.16209572152171e-61	ARF16	VAI83913.1 unnamed protein product [Triticum turgidum subsp. durum] [Triticum turgidum]
TraesCS2B02G239400	198	215	254	908	1140	877	5.13	5.25	5.88	22.06	30.19	23.51	5.42	25.2533333333333	2.22010907339336	1.79605213761879e-64	2.3353068138714e-61	CIGR1	VAH45055.1 unnamed protein product [Triticum turgidum subsp. durum] [Triticum turgidum]
TraesCS2A02G386800	260	261	290	874	979	998	6.58	6.23	6.56	20.75	25.36	26.15	6.45666666666667	24.0866666666667	1.89937330082919	2.00061785808681e-64	2.57270662625312e-61	HOP	VAH34692.1 unnamed protein product [Triticum turgidum subsp. durum] [Triticum turgidum]
TraesCS6A02G316200	24	29	26	306	338	345	1.5	1.71	1.48	18	21.64	22.37	1.56333333333333	20.67	3.72484106163123	2.43931598179955e-64	3.10275690024073e-61	HSP24.1	VAI49653.1 unnamed protein product [Triticum turgidum subsp. durum] [Triticum turgidum]
TraesCS7D02G063900	315	252	291	1191	1065	962	8.55	6.46	7.07	30.38	29.6	27.08	7.36	29.02	1.97926984800973	3.25223169758228e-64	4.09228664209112e-61	ADC1	ABX80379.1 arginine decarboxylase [Triticum aestivum]
TraesCS2D02G107100	50	36	56	470	506	360	1.09	0.74	1.09	9.63	11.3	8.14	0.973333333333333	9.69	3.31549079725622	7.39272753832498e-64	9.20331661691346e-61	CIPK29	SPT16348.1 unnamed protein product [Triticum aestivum]
TraesCS6B02G167900	30	27	31	355	302	317	0.87	0.76	0.81	9.84	9.13	9.72	0.813333333333333	9.56333333333333	3.55559491520578	8.15328866336978e-64	1.00433067996301e-60	CRPK1	AEF30550.1 serine/threonine protein kinase Stpk-B [Triticum aestivum]
TraesCS1D02G403500	193	256	217	832	847	802	6.84	8.59	6.91	27.72	30.76	29.52	7.44666666666667	29.3333333333333	1.9778743379287	2.33378266610264e-63	2.84483244950691e-60	DNAJB4	XP_020180989.1 dnaJ homolog subfamily B member 4-like [Aegilops tauschii subsp. tauschii] [Aegilops tauschii]
TraesCS5D02G307000	263	260	277	1080	978	826	8.58	8	8.1	33.09	32.65	27.91	8.22666666666667	31.2166666666667	1.92393659998099	4.64340120155703e-63	5.60185665369697e-60	PUMP5	XP_020159737.1 mitochondrial uncoupling protein 5-like [Aegilops tauschii subsp. tauschii] [Aegilops tauschii]
TraesCS5A02G190000	38	37	53	552	544	335	1.36	1.25	1.71	18.57	19.94	12.44	1.44	16.9833333333333	3.55997892888971	9.6333357326484e-63	1.15031858582243e-59	TPP7	EMS59182.1 Trehalose-phosphate phosphatase [Triticum urartu]
TraesCS5A02G526000	233	193	254	1054	893	793	9.65	7.56	9.44	41.06	37.92	34.12	8.88333333333333	37.7	2.08539149123065	2.6415488698264e-62	3.12241749338207e-59	RBL1	VAI25362.1 unnamed protein product [Triticum turgidum subsp. durum] [Triticum turgidum]
TraesCS7B02G149200	5997	6254	6554	11926	12241	12793	127.06	125.04	124.26	237.26	265.45	280.92	125.453333333333	261.21	1.05805932507109	4.86062442312755e-62	5.68799991243233e-59	HSP81-1	ADF31758.1 heat shock protein 90 [Triticum aestivum]
TraesCS3D02G096700	421	432	488	1298	1365	1188	5.68	5.5	5.89	16.44	18.84	16.59	5.69	17.29	1.6034373113357	1.10875086178853e-61	1.28463607275462e-58	NET4B	VAH57422.1 unnamed protein product [Triticum turgidum subsp. durum] [Triticum turgidum]
TraesCS7D02G420400	182	205	189	838	864	678	4.99	5.29	4.64	21.56	24.24	19.26	4.97333333333333	21.6866666666667	2.1245232867859	1.8043562163012e-61	2.07009189356862e-58	HIP1	XP_020192445.1 E3 ubiquitin-protein ligase MBR1-like [Aegilops tauschii subsp. tauschii] [Aegilops tauschii]
TraesCS6A02G099000	25	23	41	328	358	319	1.1	0.95	1.61	13.55	16.12	14.55	1.22	14.74	3.59478347153218	2.78399577921247e-61	3.16299761237866e-58	--	XP_020174323.1 histone-lysine N-methyltransferase 2D-like [Aegilops tauschii subsp. tauschii] [Aegilops tauschii]
TraesCS2D02G220200	200	241	267	833	912	799	6.71	7.62	8.01	26.26	31.34	27.8	7.44666666666667	28.4666666666667	1.93460688402454	3.72245752515471e-61	4.18855215873706e-58	CIGR1	XP_020191335.1 chitin-inducible gibberellin-responsive protein 1 [Aegilops tauschii subsp. tauschii] [Aegilops tauschii]
TraesCS1A02G122500	327	293	324	991	1022	972	9.49	8.02	8.43	27.03	30.38	29.25	8.64666666666667	28.8866666666667	1.74018775702017	4.98339968907127e-61	5.55397522299522e-58	ME6	VAH03191.1 unnamed protein product [Triticum turgidum subsp. durum] [Triticum turgidum]
TraesCS2B02G289800	330	329	351	974	954	998	14.55	13.72	13.86	40.34	43.09	45.63	14.0433333333333	43.02	1.61512210958197	2.38134494970573e-60	2.62895989343834e-57	LBD41	KAE8805633.1 LOB domain-containing protein 40 [Hordeum vulgare]
TraesCS6D02G304900	137	130	160	729	674	547	2.82	2.53	2.95	14.06	14.25	11.65	2.76666666666667	13.32	2.26737334155813	3.37302149711827e-60	3.68895066949321e-57	--	XP_020184620.1 uncharacterized protein LOC109770322 [Aegilops tauschii subsp. tauschii] [Aegilops tauschii]
TraesCS4B02G206700	1339	1199	1594	3910	5089	4217	29.71	25.12	31.66	81.47	115.58	97	28.83	98.0166666666667	1.76545624783323	1.24928443691187e-59	1.35364595718797e-56	HSP70	VAI07205.1 unnamed protein product [Triticum turgidum subsp. durum] [Triticum turgidum]
TraesCS3D02G301200	35	49	50	414	368	316	0.81	1.07	1.09	9.13	8.95	7.68	0.99	8.58666666666667	3.11659775731385	1.48576492565655e-59	1.59511177183652e-56	--	XP_020168246.1 uncharacterized protein LOC109753734 [Aegilops tauschii subsp. tauschii] [Aegilops tauschii]
TraesCS3A02G038300	61	50	79	510	501	375	2.1	1.62	2.43	16.45	17.63	13.35	2.05	15.81	2.94714155285293	3.20338904504602e-59	3.40788175299432e-56	CML16	VAH56014.1 unnamed protein product [Triticum turgidum subsp. durum] [Triticum turgidum]
TraesCS1A02G236100	114	121	165	658	737	569	2.67	2.67	3.46	14.58	17.78	13.9	2.93333333333333	15.42	2.39418983711153	4.9414863322289e-59	5.20957309522604e-56	BON3	VAH18570.1 unnamed protein product [Triticum turgidum subsp. durum] [Triticum turgidum]
TraesCS7D02G029700	623	682	657	1878	1867	1563	10.19	10.53	9.62	28.86	31.27	26.51	10.1133333333333	28.88	1.5138121573613	5.44642144644401e-59	5.69063509380152e-56	CSLD2	VAI68789.1 unnamed protein product [Triticum turgidum subsp. durum] [Triticum turgidum]
TraesCS2A02G081400	50	48	60	371	446	362	1.75	1.59	1.88	12.2	15.99	13.14	1.74	13.7766666666667	2.98506765180466	1.14898912541892e-58	1.1807972273817e-55	PBL7	VAH25763.1 unnamed protein product [Triticum turgidum subsp. durum] [Triticum turgidum]
TraesCS7A02G160800	137	127	135	607	586	519	1.92	1.68	1.69	7.98	8.4	7.54	1.76333333333333	7.97333333333333	2.17687776208408	1.15030407890408e-58	1.1807972273817e-55	ARF16	VAI71697.1 unnamed protein product [Triticum turgidum subsp. durum] [Triticum turgidum]
TraesCS6A02G384300	71	65	78	423	591	470	3.4	2.92	3.32	18.94	28.82	23.2	3.21333333333333	23.6533333333333	2.8799009580711	1.74078813827203e-58	1.7713957349293e-55	DESI1	VAI51320.1 unnamed protein product [Triticum turgidum subsp. durum] [Triticum turgidum]
TraesCS3D02G041500	103	103	133	721	718	493	5.94	5.61	6.87	39.08	42.44	29.49	6.14	37.0033333333333	2.59134467670543	1.80385308099817e-58	1.81974564866007e-55	CML16	XP_020182372.1 probable calcium-binding protein CML16 [Aegilops tauschii subsp. tauschii] [Aegilops tauschii]
TraesCS2B02G217500	121	121	130	562	583	497	2.91	2.73	2.79	12.63	14.27	12.32	2.81	13.0733333333333	2.21798499925006	4.39027755879081e-58	4.39110308106682e-55	CIGR2	VAH44361.1 unnamed protein product [Triticum turgidum subsp. durum] [Triticum turgidum]
TraesCS4B02G194900	35	42	30	409	311	300	0.96	1.08	0.73	10.43	8.66	8.46	0.923333333333333	9.18333333333333	3.31409443740933	6.4692379430106e-57	6.41562002175412e-54	FAD7	VAI06763.1 unnamed protein product [Triticum turgidum subsp. durum] [Triticum turgidum]
TraesCS1B02G183500	43	30	56	466	364	326	1.67	1.1	1.98	17.2	14.66	13.27	1.58333333333333	15.0433333333333	3.24808735999418	6.6809702376888e-57	6.56992016096486e-54	NHL6	VAH16745.1 unnamed protein product [Triticum turgidum subsp. durum] [Triticum turgidum]
TraesCS5D02G503400	16	4	12	401	323	249	0.4	0.09	0.27	9.36	8.21	6.39	0.253333333333333	7.98666666666667	4.9784846793452	8.72462630896699e-57	8.50811016606613e-54	At5g13200	XP_020161851.1 GEM-like protein 5 [Aegilops tauschii subsp. tauschii] [Aegilops tauschii]
TraesCS3D02G209200	33	21	32	286	319	326	0.81	0.48	0.7	6.56	7.98	8.26	0.663333333333333	7.6	3.51819348850846	1.0250218147091e-56	9.91323163643702e-54	IQM1	XP_020176288.1 IQ domain-containing protein IQM1-like [Aegilops tauschii subsp. tauschii] [Aegilops tauschii]
TraesCS4A02G092100	69	62	90	429	603	484	5.39	4.57	6.3	31.53	48.25	39.22	5.42	39.6666666666667	2.87156241100764	1.12796691857892e-56	1.08194217004871e-53	HSP17.9A	VAH89175.1 unnamed protein product [Triticum turgidum subsp. durum] [Triticum turgidum]
TraesCS5A02G148000	118	122	158	615	621	515	2.85	2.79	3.43	14	15.4	12.92	3.02333333333333	14.1066666666667	2.22216517158551	1.26438098261795e-56	1.20293001095868e-53	CIPK15	VAI16029.1 unnamed protein product [Triticum turgidum subsp. durum] [Triticum turgidum]
TraesCS1B02G141100	59	26	70	522	447	420	1.59	0.66	1.69	13.16	12.28	11.68	1.31333333333333	12.3733333333333	3.2359291756712	1.68624918422395e-56	1.59135687126012e-53	--	KAE8783234.1 putative nuclease HARBI1 [Hordeum vulgare]
TraesCS6D02G062200	99	92	97	681	597	432	2.19	1.92	1.92	14.14	13.51	9.91	2.01	12.52	2.63896715575369	4.44002434206666e-56	4.1566442284586e-53	HAK19	XP_020199872.1 potassium transporter 19-like [Aegilops tauschii subsp. tauschii] [Aegilops tauschii]
TraesCS6D02G322300	3	8	12	282	344	298	0.19	0.49	0.69	17.07	22.69	19.9	0.456666666666667	19.8866666666667	5.44451617937469	4.60018838589277e-56	4.24931215742875e-53	HSP18.6	XP_020181941.1 18.6 kDa class III heat shock protein-like [Aegilops tauschii subsp. tauschii] [Aegilops tauschii]
TraesCS2A02G427700	187	169	234	836	789	663	8.69	7.43	9.75	36.56	37.6	32	8.62333333333333	35.3866666666667	2.03688831668545	4.61163408584242e-56	4.24931215742875e-53	ERF4	VAH35821.1 unnamed protein product [Triticum turgidum subsp. durum] [Triticum turgidum]
TraesCS3A02G113100	2	4	11	347	418	318	0.13	0.25	0.65	21.45	28.19	21.7	0.343333333333333	23.78	6.11399497328359	4.77522825447151e-56	4.3656778187091e-53	HSP18	BAK05681.1 predicted protein [Hordeum vulgare subsp. vulgare] [Hordeum vulgare]
TraesCS1B02G268600	300	291	272	1004	1117	905	7.16	6.55	5.79	22.48	27.25	22.36	6.5	24.03	1.88632502521405	5.72447737068264e-56	5.19294411528701e-53	ufd1	VAH76679.1 unnamed protein product [Triticum turgidum subsp. durum] [Triticum turgidum]
TraesCS7A02G320800	137	133	150	660	704	527	6.45	5.91	6.34	29.3	34.03	25.79	6.23333333333333	29.7066666666667	2.25271096256504	8.29982403920452e-56	7.4712462208907e-53	BC10	XP_020162893.1 uncharacterized protein LOC109748268 [Aegilops tauschii subsp. tauschii] [Aegilops tauschii]
TraesCS7D02G439800	63	58	73	588	484	354	5.37	4.67	5.57	47.07	42.27	31.26	5.20333333333333	40.2	2.94968746480954	9.20156269151526e-56	8.21973488004961e-53	KIC	XP_020157440.1 calcium-binding protein PBP1-like [Aegilops tauschii subsp. tauschii] [Aegilops tauschii]
TraesCS4D02G213100	232	225	287	790	938	885	13.87	12.69	15.37	44.33	57.4	54.79	13.9766666666667	52.1733333333333	1.9002922800544	6.64479768854844e-55	5.8908145084039e-52	HSP17.9A	XP_020171799.1 17.9 kDa class I heat shock protein [Aegilops tauschii subsp. tauschii] [Aegilops tauschii]
TraesCS6D02G291400	185	170	223	822	737	631	3.39	2.94	3.65	14.11	13.8	11.97	3.32666666666667	13.2933333333333	1.99855368906093	1.02388872618178e-54	9.00883507633413e-52	FH16	XP_020187630.1 formin-like protein 16 [Aegilops tauschii subsp. tauschii] [Aegilops tauschii]
TraesCS7D02G116200	6	3	3	420	448	391	0.11	0.05	0.05	7.35	8.55	7.56	0.07	7.82	6.80366987524975	1.07342114895904e-54	9.3741708726481e-52	ABCC10	VAI82713.1 unnamed protein product [Triticum turgidum subsp. durum] [Triticum turgidum]
TraesCS1B02G141000	50	73	82	462	764	500	1.75	2.41	2.58	15.24	27.49	18.19	2.24666666666667	20.3066666666667	3.17609544530543	1.37995549848944e-54	1.19618631366097e-51	--	GER37128.1 cadherin-8 [Striga asiatica]
TraesCS6B02G396800	21	26	32	374	345	243	0.39	0.46	0.54	6.61	6.64	4.74	0.463333333333333	5.99666666666667	3.69403839852798	1.82200262424855e-54	1.56775287569716e-51	--	VAI62303.1 unnamed protein product [Triticum turgidum subsp. durum] [Triticum turgidum]
TraesCS3B02G335900	45	54	43	371	347	305	1.07	1.24	0.95	8.51	8.43	7.68	1.08666666666667	8.20666666666667	2.91688689225338	2.24125151456566e-54	1.91442142144162e-51	--	VAH80095.1 unnamed protein product [Triticum turgidum subsp. durum] [Triticum turgidum]
TraesCS5D02G437700	219	195	248	772	724	691	5.35	4.51	5.42	17.74	18.13	17.53	5.09333333333333	17.8	1.80519519853917	2.74268319400473e-54	2.32575559948422e-51	At1g64760	XP_020197235.1 glucan endo-1,3-beta-glucosidase 8-like [Aegilops tauschii subsp. tauschii] [Aegilops tauschii]
TraesCS3D02G484900	39	22	45	424	360	289	2.57	1.36	2.64	26.14	24.17	19.66	2.19	23.3233333333333	3.41277121599242	3.71560436861351e-54	3.12811118290568e-51	CML15	XP_020198328.1 probable calcium-binding protein CML10 [Aegilops tauschii subsp. tauschii] [Aegilops tauschii]
TraesCS2D02G425700	215	146	238	1024	1018	774	11.01	7.06	10.9	49.24	53.36	41.08	9.65666666666667	47.8933333333333	2.31022766547074	4.38272257563706e-54	3.66339258033e-51	ERF3	XP_020184692.1 ethylene-responsive transcription factor 4-like [Aegilops tauschii subsp. tauschii] [Aegilops tauschii]
TraesCS2D02G456400	648	635	680	1747	1727	1478	6.66	6.15	6.25	16.86	18.17	15.74	6.35333333333333	16.9233333333333	1.41342814081968	6.46348167295036e-54	5.36432306618437e-51	CPK13	SPT19931.1 unnamed protein product [Triticum aestivum]
TraesCS4B02G212300	47	56	96	417	513	476	2.84	3.19	5.19	23.62	31.7	29.79	3.74	28.37	2.92325597538672	6.56202767542752e-54	5.40775776502732e-51	HSP17.4	VAI07383.1 unnamed protein product [Triticum turgidum subsp. durum] [Triticum turgidum]
TraesCS2A02G583500	342	284	316	1137	997	913	9.07	7.11	7.51	28.33	27.1	25.11	7.89666666666667	26.8466666666667	1.76542727370552	9.91007412805001e-54	8.10976709519348e-51	NHL10	VAH39150.1 unnamed protein product [Triticum turgidum subsp. durum] [Triticum turgidum]
TraesCS1A02G282600LC	18	27	17	418	283	250	1.09	1.53	0.88	23.23	17.13	15.33	1.16666666666667	18.5633333333333	3.99199146546468	1.06880503796071e-53	8.68567383001657e-51	--	PUZ38494.1 hypothetical protein GQ55_9G201300 [Panicum hallii var. hallii] [Panicum hallii]
TraesCS3D02G045500	93	84	98	442	570	471	5.61	4.77	5.34	25.13	35.34	29.56	5.24	30.01	2.51780460206084	1.28265168489647e-53	1.03516183082728e-50	hsp16.9A	XP_020201211.1 16.9 kDa class I heat shock protein 1-like [Aegilops tauschii subsp. tauschii] [Aegilops tauschii]
TraesCS6D02G379200	12	12	13	302	230	240	0.52	0.49	0.5	12.19	10.12	10.7	0.503333333333333	11.0033333333333	4.45028268389745	2.04587352194747e-53	1.63980966633792e-50	--	XP_020176846.1 spidroin-1-like [Aegilops tauschii subsp. tauschii] [Aegilops tauschii]
TraesCS2D02G162600	107	75	156	668	560	627	7.22	4.77	9.42	42.32	38.67	43.84	7.13666666666667	41.61	2.5436079933804	2.54337847841395e-53	2.02470228776161e-50	MPSR1	XP_020192313.1 E3 ubiquitin-protein ligase RDUF1-like [Aegilops tauschii subsp. tauschii] [Aegilops tauschii]
TraesCS6A02G312000	152	177	164	672	647	547	2.87	3.4	2.8	11.97	12.28	10.78	3.02333333333333	11.6766666666667	1.94941653227355	4.7654729106989e-53	3.76800791186356e-50	FH16	VAI49518.1 unnamed protein product [Triticum turgidum subsp. durum] [Triticum turgidum]
TraesCS7B02G309900	293	300	374	1221	1015	890	9.71	9.39	11.07	37.97	34.41	30.56	10.0566666666667	34.3133333333333	1.77061708605983	6.73062713378792e-53	5.28611710369215e-50	MPK12	VAI90884.1 unnamed protein product [Triticum turgidum subsp. durum] [Triticum turgidum]
TraesCS1A02G395300	106	137	136	493	538	558	3.87	4.72	4.44	16.9	20.11	21.11	4.34333333333333	19.3733333333333	2.15719761906471	8.72771752567224e-53	6.80889973526145e-50	DNAJB4	AHM24949.1 HSP40, partial [Triticum aestivum]
TraesCS4D02G187800	146	144	175	624	676	544	2.63	2.43	2.81	10.51	12.41	10.12	2.62333333333333	11.0133333333333	2.06977814591196	1.26733988131775e-52	9.82163229083219e-50	--	XP_020199282.1 midasin-like isoform X1 [Aegilops tauschii subsp. tauschii] [Aegilops tauschii]
TraesCS4A02G124200LC	52	51	69	459	388	314	2.65	2.43	3.13	21.93	20.2	16.58	2.73666666666667	19.57	2.83815212957015	4.07049639493378e-52	3.13380019163119e-49	--	VAH90084.1 unnamed protein product [Triticum turgidum subsp. durum] [Triticum turgidum]
TraesCS5D02G140600	12	11	12	286	259	213	0.23	0.2	0.2	5.15	5.08	4.23	0.21	4.82	4.5205719134512	8.54564126838915e-52	6.53613093143422e-49	--	XP_020197180.1 uncharacterized protein LOC109782960 [Aegilops tauschii subsp. tauschii] [Aegilops tauschii]
TraesCS4D02G021400	2114	2130	2654	604	653	762	50.33	47.87	56.54	13.5	15.91	18.79	51.58	16.0666666666667	-1.68274	9.42214818265715e-52	7.15973132877211e-49	THIC	XP_020149646.1 phosphomethylpyrimidine synthase, chloroplastic [Aegilops tauschii subsp. tauschii] [Aegilops tauschii]
TraesCS1D02G072900	10	8	7	258	252	240	0.33	0.25	0.21	8.09	8.61	8.3	0.263333333333333	8.33333333333333	4.98393163137235	3.42322483321491e-51	2.58446849311274e-48	WRKY24	XP_020151406.1 probable WRKY transcription factor 26 [Aegilops tauschii subsp. tauschii] [Aegilops tauschii]
TraesCS5B02G146500	33	53	66	386	347	320	0.96	1.46	1.73	10.58	10.37	9.68	1.38333333333333	10.21	2.88376212536467	3.99356809422316e-51	2.99573926616783e-48	CIPK15	AJR22377.1 CBL-interacting protein kinase 15 [Triticum aestivum]
TraesCS2A02G542700	105	101	95	502	456	411	4.43	4.03	3.59	19.92	19.71	18	4.01666666666667	19.21	2.25778687326936	5.93259683851954e-51	4.42193851743461e-48	ERF3	VAH38483.1 unnamed protein product [Triticum turgidum subsp. durum] [Triticum turgidum]
TraesCS2B02G182300	133	101	177	691	619	551	8.1	5.81	9.65	39.55	38.62	34.81	7.85333333333333	37.66	2.26165596150492	1.23579670106554e-49	9.15287351595518e-47	MPSR1	XP_020192313.1 E3 ubiquitin-protein ligase RDUF1-like [Aegilops tauschii subsp. tauschii] [Aegilops tauschii]
TraesCS6B02G374100	21	20	26	266	253	226	1.25	1.12	1.39	14.89	15.43	13.95	1.25333333333333	14.7566666666667	3.55752480642023	1.26215423363227e-49	9.28929639799472e-47	HSP18.6	VAI61724.1 unnamed protein product [Triticum turgidum subsp. durum] [Triticum turgidum]
TraesCS2A02G154900	12	11	18	234	278	220	0.34	0.29	0.45	6.19	8.03	6.44	0.36	6.88666666666667	4.25773703670159	2.3319908447214e-49	1.70558895394368e-46	IQM2	VAH27676.1 unnamed protein product [Triticum turgidum subsp. durum] [Triticum turgidum]
TraesCS1A02G093800	1255	1281	1296	3011	2944	2508	49.77	47.94	45.99	112.14	119.48	103.09	47.9	111.57	1.2198515927096	4.2700950330125e-49	3.10369603076515e-46	OsI_017815	EMS51243.1 hypothetical protein TRIUR3_26221 [Triticum urartu]
TraesCS4A02G109300	70	78	91	443	407	345	1.87	1.95	2.16	11.07	11.09	9.53	1.99333333333333	10.5633333333333	2.40581027018413	6.5475109001049e-49	4.72964704044491e-46	FAD7	VAH89820.1 unnamed protein product [Triticum turgidum subsp. durum] [Triticum turgidum]
TraesCS7B02G262800	21	14	29	263	248	235	1.84	1.16	2.27	21.6	22.2	21.3	1.75666666666667	21.7	3.62678267641578	9.19472294033623e-49	6.6011341590431e-46	--	-
TraesCS5B02G262900	217	199	299	959	901	735	10.05	8.69	12.39	41.69	42.7	35.27	10.3766666666667	39.8866666666667	1.94256348618577	9.59091616238572e-49	6.8435865314311e-46	SAP1	VAI33814.1 unnamed protein product [Triticum turgidum subsp. durum] [Triticum turgidum]
TraesCS3A02G347500	6	9	8	253	245	221	0.15	0.22	0.18	6.03	6.36	5.81	0.183333333333333	6.06666666666667	5.0483630215614	1.06882485755082e-48	7.58036499880682e-46	WRKY24	EMS64237.1 putative WRKY transcription factor 33 [Triticum urartu]
TraesCS5A02G451400	8	7	9	257	249	213	0.21	0.17	0.21	6.21	6.57	5.67	0.196666666666667	6.15	4.96676205158592	1.0926280979279e-48	7.70250152263366e-46	GALT5	BAJ96567.1 predicted protein [Hordeum vulgare subsp. vulgare] [Hordeum vulgare]
TraesCS4D02G249000	113	117	123	499	479	424	10.3	10.07	10.04	42.73	44.71	40.06	10.1366666666667	42.5	2.06787952560278	1.48162180255491e-48	1.03821764418312e-45	--	XP_020148433.1 uncharacterized protein LOC109733618 [Aegilops tauschii subsp. tauschii] [Aegilops tauschii]
TraesCS5D02G271100	300	252	374	1159	1249	926	15.24	12.08	16.99	55.29	64.93	48.73	14.77	56.3166666666667	1.93089211856522	2.20456550983888e-48	1.53561110174027e-45	SAP1	XP_020197560.1 zinc finger A20 and AN1 domain-containing stress-associated protein 1 [Aegilops tauschii subsp. tauschii] [Aegilops tauschii]
TraesCS1A02G070400	14	15	11	234	205	241	0.5	0.51	0.35	7.75	7.4	8.81	0.453333333333333	7.98666666666667	4.13894935153845	3.10063120599364e-48	2.14699446738336e-45	WRKY24	VAH01662.1 unnamed protein product [Triticum turgidum subsp. durum] [Triticum turgidum]
TraesCS1B02G151300	677	728	781	1644	1744	1542	9.23	9.38	9.54	21.06	24.37	21.81	9.38333333333333	22.4133333333333	1.25618480226857	5.78325992458722e-48	3.98099201702968e-45	HSP70	XP_003568673.1 stromal 70 kDa heat shock-related protein, chloroplastic [Brachypodium distachyon]
TraesCS5B02G406000	52	47	58	314	357	304	2.12	1.81	2.11	12.01	14.88	12.83	2.01333333333333	13.24	2.7172451682033	8.26535654321152e-48	5.6563073298228e-45	AZF2	Q42430.1 RecName: Full=Zinc finger protein 1; AltName: Full=WZF1 [Triticum aestivum]
TraesCS5B02G299000	94	95	83	533	490	371	1.64	1.56	1.3	8.76	8.78	6.72	1.5	8.08666666666667	2.43058264390347	1.86903431105546e-47	1.27161705318798e-44	RBOHC	AXF73973.1 NADPH oxidase superfamily protein [Triticum aestivum]
TraesCS6D02G306700	155	149	175	732	679	508	3.84	3.48	3.87	17	17.19	13.03	3.73	15.74	2.07718800525225	2.71189714492217e-47	1.83440247221435e-44	CPR5	XP_020186351.1 protein CPR-5-like [Aegilops tauschii subsp. tauschii] [Aegilops tauschii]
TraesCS3D02G139600	69	71	60	419	443	319	2.26	2.2	1.76	12.91	14.86	10.85	2.07333333333333	12.8733333333333	2.63436167882005	5.01916531451591e-47	3.37559059445564e-44	BBX22	XP_020192017.1 B-box zinc finger protein 22-like [Aegilops tauschii subsp. tauschii] [Aegilops tauschii]
TraesCS6B02G084000	123	101	100	495	482	430	2.7	2.09	1.96	10.2	10.83	9.79	2.25	10.2733333333333	2.19090745457659	5.42747811628834e-47	3.62933910928168e-44	HAK19	VAI53918.1 unnamed protein product [Triticum turgidum subsp. durum] [Triticum turgidum]
TraesCS4D02G212300	13	26	34	236	287	284	0.86	1.63	2.02	14.71	19.47	19.51	1.50333333333333	17.8966666666667	3.57345406630516	7.34184453318724e-47	4.8815757441059e-44	HSP17.9A	XP_020158980.1 17.9 kDa class I heat shock protein-like [Aegilops tauschii subsp. tauschii] [Aegilops tauschii]
TraesCS4D02G310100	167	160	156	577	516	542	3.87	3.49	3.23	12.55	12.23	13	3.53	12.5933333333333	1.83492011239603	8.57666286257375e-47	5.67038554522093e-44	LSI2	XP_020184173.1 putative transporter arsB [Aegilops tauschii subsp. tauschii] [Aegilops tauschii]
TraesCS1B02G206600LC	696	723	797	1794	1637	1474	35.34	34.65	36.22	85.55	85.07	77.62	35.4033333333333	82.7466666666667	1.22481599524195	1.51357625787428e-46	9.95065847466089e-44	OsI_017815	XP_020165753.1 REF/SRPP-like protein OsI_017815 [Aegilops tauschii subsp. tauschii] [Aegilops tauschii]
TraesCS3B02G106900	75	77	106	615	376	435	3.14	3.04	3.97	24.15	16.09	18.85	3.38333333333333	19.6966666666667	2.54143427150165	1.85530056226985e-46	1.21291051618962e-43	LBD40	CDJ26274.1 unnamed protein product [Triticum aestivum]
TraesCS7B02G188000	109	123	142	455	464	476	2.66	2.8	3.2	10.11	11.27	11.99	2.88666666666667	11.1233333333333	1.94611275645559	2.58353054746592e-46	1.67961062069754e-43	LHY	VAI87750.1 unnamed protein product [Triticum turgidum subsp. durum] [Triticum turgidum]
TraesCS3B02G308100	16	11	13	216	414	254	0.28	0.18	0.21	3.59	7.5	4.65	0.223333333333333	5.24666666666667	4.55413063504972	2.99396616544277e-46	1.93569010283118e-43	CLPB1	CDM83313.1 unnamed protein product [Triticum aestivum]
TraesCS4B02G356600	366	314	328	1089	1071	888	13.51	10.97	10.84	37.79	40.51	34.01	11.7733333333333	37.4366666666667	1.66892914186664	3.41221581081854e-46	2.19397977260223e-43	RBL1	VAI10983.1 unnamed protein product [Triticum turgidum subsp. durum] [Triticum turgidum]
TraesCS5B02G431600	235	259	207	766	793	709	5.33	5.55	4.19	16.3	18.39	16.64	5.02333333333333	17.11	1.76812284361275	4.27905988362528e-46	2.73630680711256e-43	At1g64760	XP_020197235.1 glucan endo-1,3-beta-glucosidase 8-like [Aegilops tauschii subsp. tauschii] [Aegilops tauschii]
TraesCS2A02G583000	40	31	38	342	268	245	2.34	1.75	2.03	18.95	16.17	14.98	2.04	16.7	3.03320704538992	5.68135759056614e-46	3.61328167371321e-43	CAF1-11	VAH39156.1 unnamed protein product [Triticum turgidum subsp. durum] [Triticum turgidum]
TraesCS1B02G269800	85	95	95	391	470	396	1.46	1.55	1.46	6.33	8.29	7.07	1.49	7.23	2.27868331648896	8.42202164893182e-46	5.32736117514216e-43	RPPL1	VAH19233.1 unnamed protein product [Triticum turgidum subsp. durum] [Triticum turgidum]
TraesCS4A02G117900	199	206	254	700	716	620	3.1	3.04	3.55	10.27	11.46	10.05	3.23	10.5933333333333	1.71355055393343	9.01143884660058e-46	5.66955159519835e-43	--	VAH90077.1 unnamed protein product [Triticum turgidum subsp. durum] [Triticum turgidum]
TraesCS6A02G350000	298	192	254	1250	1173	839	6.95	4.23	5.3	27.39	28.02	20.29	5.49333333333333	25.2333333333333	2.19957705768987	1.73049978661145e-45	1.08292270603661e-42	CYPRO4	VAI50502.1 unnamed protein product [Triticum turgidum subsp. durum] [Triticum turgidum]
TraesCS7A02G553800	14	20	11	208	214	244	0.37	0.64	0.29	5.13	5.84	6.65	0.433333333333333	5.87333333333333	3.76063039589196	2.33838210500756e-45	1.45554335474572e-42	RVE2	EMS59783.1 Protein LHY [Triticum urartu]
TraesCS7A02G376800	2418	2883	3045	928	842	1093	93.49	105.21	105.35	33.69	33.32	43.82	101.35	36.9433333333333	-1.45596	4.50486179808536e-45	2.78924834569071e-42	THI1-2	VAI77942.1 unnamed protein product [Triticum turgidum subsp. durum] [Triticum turgidum]
TraesCS5B02G223900	116	135	148	636	477	458	3.2	3.51	3.66	16.47	13.46	13.11	3.45666666666667	14.3466666666667	2.0532621837434	5.35318070383012e-45	3.29705217012426e-42	CIPK16	VAI32774.1 unnamed protein product [Triticum turgidum subsp. durum] [Triticum turgidum]
TraesCS1D02G187700	66	46	74	449	401	305	2.27	1.49	2.27	14.5	14.09	10.85	2.01	13.1466666666667	2.70942964447783	6.08089987711412e-45	3.72564955717094e-42	PP2A13	XP_020176326.1 F-box protein PP2-A13-like [Aegilops tauschii subsp. tauschii] [Aegilops tauschii]
TraesCS2A02G401600	20	33	28	255	266	221	0.84	1.33	1.08	10.22	11.64	9.78	1.08333333333333	10.5466666666667	3.28323797655698	6.85920660424365e-45	4.18061497521771e-42	HSFB2A	XP_020152813.1 heat stress transcription factor B-2a-like [Aegilops tauschii subsp. tauschii] [Aegilops tauschii]
TraesCS2A02G196700	14	16	29	230	289	220	0.38	0.41	0.7	5.85	8.03	6.17	0.496666666666667	6.68333333333333	3.75021800088012	7.94173751170303e-45	4.81532646162959e-42	PAL	VAH28691.1 unnamed protein product [Triticum turgidum subsp. durum] [Triticum turgidum]
TraesCS3A02G368800	10	11	9	220	237	185	0.3	0.32	0.26	6.4	7.52	5.92	0.293333333333333	6.61333333333333	4.49476469174958	1.339831671468e-44	8.08194751848084e-42	HSPRO1	VAH66129.1 unnamed protein product [Triticum turgidum subsp. durum] [Triticum turgidum]
TraesCS2B02G448100	136	112	144	690	552	454	6.53	5.06	6.17	31.03	27.03	22.51	5.92	26.8566666666667	2.18161117383973	1.65382781256614e-44	9.92483273241616e-42	ERF3	VAH51116.1 unnamed protein product [Triticum turgidum subsp. durum] [Triticum turgidum]
TraesCS1D02G230000	44	55	57	375	401	265	1.2	1.43	1.39	9.74	11.35	7.59	1.34	9.56	2.83477761752298	1.90191170075681e-44	1.13553832166308e-41	Os05g0358500	XP_020150885.1 probable protein phosphatase 2C 48 [Aegilops tauschii subsp. tauschii] [Aegilops tauschii]
TraesCS5D02G461600	23	17	30	301	281	197	0.71	0.49	0.81	8.59	8.76	6.21	0.67	7.85333333333333	3.55107213265153	2.75852712118986e-44	1.63862112068975e-41	GALT5	XP_020177628.1 hydroxyproline O-galactosyltransferase GALT5-like [Aegilops tauschii subsp. tauschii] [Aegilops tauschii]
TraesCS4D02G145600	21	22	32	236	248	218	1.34	1.32	1.82	14.11	16.16	14.38	1.49333333333333	14.8833333333333	3.31708953795098	3.60353105323991e-44	2.12975965107192e-41	HSP18	CDM81632.1 unnamed protein product [Triticum aestivum]
TraesCS1D02G402000	91	87	99	386	367	385	2.25	2.03	2.2	8.98	9.31	9.9	2.16	9.39666666666667	2.1211177596858	3.6951700588779e-44	2.17294568155784e-41	--	XP_020196783.1 uncharacterized protein LOC109782570 [Aegilops tauschii subsp. tauschii] [Aegilops tauschii]
TraesCS1D02G259300	33	49	45	269	335	280	0.46	0.64	0.56	3.49	4.74	4.01	0.553333333333333	4.08	2.88234841134573	3.78108717203331e-44	2.21235191522841e-41	RPPL1	XP_020193514.1 putative disease resistance protein RGA4 [Aegilops tauschii subsp. tauschii] [Aegilops tauschii]
TraesCS2B02G096000	38	71	65	372	367	302	1.29	2.28	1.98	11.87	12.78	10.64	1.85	11.7633333333333	2.66869975354225	4.96118788524486e-44	2.8883986502842e-41	PBL27	VAH41565.1 unnamed protein product [Triticum turgidum subsp. durum] [Triticum turgidum]
TraesCS2A02G456100	322	345	384	1145	975	829	11.04	11.16	11.8	36.9	34.26	29.47	11.3333333333333	33.5433333333333	1.56545381668077	5.98263037056971e-44	3.46583847140994e-41	CPK13	VAH36513.1 unnamed protein product [Triticum turgidum subsp. durum] [Triticum turgidum]
TraesCS3B02G536200	58	48	83	388	370	309	3.44	2.68	4.4	21.57	22.47	18.98	3.50666666666667	21.0066666666667	2.58267504972524	6.68024683147737e-44	3.84700296857405e-41	CML15	CDM86427.1 unnamed protein product [Triticum aestivum]
TraesCS3B02G492900	67	90	91	612	519	340	3.47	4.4	4.22	29.79	27.53	18.27	4.03	25.1966666666667	2.64438114455963	6.70633389951554e-44	3.84700296857405e-41	SRC2	VAH84309.1 unnamed protein product [Triticum turgidum subsp. durum] [Triticum turgidum]
TraesCS5D02G411400	13	10	28	240	229	210	0.43	0.31	0.84	7.51	7.81	7.26	0.526666666666667	7.52666666666667	3.8370490225959	8.51846572417871e-44	4.86267266329191e-41	AZF2	XP_020167815.1 zinc finger protein 1 [Aegilops tauschii subsp. tauschii] [Aegilops tauschii]
TraesCS3A02G199600	342	329	352	863	929	864	9.02	8.2	8.3	21.39	25.1	23.62	8.50666666666667	23.37	1.45799190573911	1.08971757464787e-43	6.19033640875937e-41	ufd1	VAH60874.1 unnamed protein product [Triticum turgidum subsp. durum] [Triticum turgidum]
TraesCS2D02G061300	748	633	677	1870	2167	1694	41.19	32.89	33.36	96.69	122.13	96.67	35.8133333333333	105.163333333333	1.55406306734552	1.1794321869909e-43	6.66760934232122e-41	--	XP_020190506.1 proline-rich protein 4-like [Aegilops tauschii subsp. tauschii] [Aegilops tauschii]
TraesCS5B02G460200	94	73	84	504	412	346	2.35	1.74	1.89	11.87	10.59	8.99	1.99333333333333	10.4833333333333	2.39484262756854	1.22841581957981e-43	6.91113827109945e-41	GALT5	XP_020177628.1 hydroxyproline O-galactosyltransferase GALT5-like [Aegilops tauschii subsp. tauschii] [Aegilops tauschii]
TraesCS4B02G023800	843	955	1041	254	295	278	13.04	13.95	14.41	3.69	4.66	4.45	13.8	4.26666666666667	-1.69349	1.88070688690797e-43	1.05303388191265e-40	THIC	VAI00970.1 unnamed protein product [Triticum turgidum subsp. durum] [Triticum turgidum]
TraesCS7D02G241100	3202	3412	3808	6446	6766	7835	73.97	74.39	78.72	139.83	159.97	187.59	75.6933333333333	162.463333333333	1.10187600421598	2.38510161077601e-43	1.32909219379157e-40	HSP81-1	XP_020157515.1 heat shock protein 81-1 [Aegilops tauschii subsp. tauschii] [Aegilops tauschii]
TraesCS7D02G353800	120	94	99	485	428	402	9.01	6.7	6.68	34.29	33	31.35	7.46333333333333	32.88	2.13931827155024	3.20739244004987e-43	1.77884112852851e-40	MBF1C	XP_020198792.1 multiprotein-bridging factor 1c [Aegilops tauschii subsp. tauschii] [Aegilops tauschii]
TraesCS2B02G227000	154	134	172	579	690	514	3.62	2.97	3.61	12.74	16.55	12.49	3.4	13.9266666666667	2.03424334020825	3.58410985120957e-43	1.97839482551059e-40	CPK20	XP_020168962.1 calcium-dependent protein kinase 20 [Aegilops tauschii subsp. tauschii] [Aegilops tauschii]
TraesCS6D02G083500	87	55	76	470	500	337	4.29	2.56	3.35	21.74	25.21	17.21	3.4	21.3866666666667	2.65310498959606	4.65673791108818e-43	2.55840743582799e-40	--	XP_020174323.1 histone-lysine N-methyltransferase 2D-like [Aegilops tauschii subsp. tauschii] [Aegilops tauschii]
TraesCS6D02G369300	103	81	109	445	492	382	4.86	3.59	4.6	19.65	23.68	18.62	4.35	20.65	2.24705447557072	5.08644785337941e-43	2.78143131167367e-40	DESI1	XP_020188402.1 desumoylating isopeptidase 1-like [Aegilops tauschii subsp. tauschii] [Aegilops tauschii]
TraesCS6A02G325200	137	144	152	603	512	442	3.44	3.26	3.25	13.57	13.01	10.99	3.31666666666667	12.5233333333333	1.91681268521075	8.12793792907471e-43	4.42394210388921e-40	--	VAI49875.1 unnamed protein product [Triticum turgidum subsp. durum] [Triticum turgidum]
TraesCS6B02G355500	191	180	211	671	637	536	4.12	3.68	4.33	13.76	14.22	12.06	4.04333333333333	13.3466666666667	1.72286242371549	1.00571465651105e-42	5.44864539510352e-40	--	VAI61326.1 unnamed protein product [Triticum turgidum subsp. durum] [Triticum turgidum]
TraesCS1B02G404000	37	37	45	258	261	251	1.03	0.97	1.13	6.8	7.51	7.31	1.04333333333333	7.20666666666667	2.78813196080204	1.12120001306257e-42	6.0463164944059e-40	PSS2	XP_020159364.1 CDP-diacylglycerol--serine O-phosphatidyltransferase 2 isoform X2 [Aegilops tauschii subsp. tauschii] [Aegilops tauschii]
TraesCS1A02G029800	57	53	74	306	374	323	1.86	1.64	2.16	9.34	12.44	10.86	1.88666666666667	10.88	2.52776709913961	1.16218975798567e-42	6.23861329628438e-40	RHC2A	XP_020179053.1 E3 ubiquitin-protein ligase RDUF1-like [Aegilops tauschii subsp. tauschii] [Aegilops tauschii]
TraesCS7D02G419900	95	107	116	542	497	365	4.96	5.29	5.41	26.66	26.62	19.79	5.22	24.3566666666667	2.22219499471406	2.03079156080266e-42	1.08514744305137e-39	XTH23	XP_020147019.1 probable xyloglucan endotransglucosylase/hydrolase protein 23 [Aegilops tauschii subsp. tauschii] [Aegilops tauschii]
TraesCS7B02G478200	5	9	13	205	176	230	0.12	0.2	0.31	4.63	4.16	5.48	0.21	4.75666666666667	4.50148969597585	2.27769857006357e-42	1.21154928211809e-39	RVE2	VAI94007.1 unnamed protein product [Triticum turgidum subsp. durum] [Triticum turgidum]
TraesCS1A02G195700	86	110	94	460	422	354	1.38	1.67	1.35	6.92	6.93	5.88	1.46666666666667	6.57666666666667	2.1648155271989	2.77827193090385e-42	1.47112641582909e-39	JMJ706	VAH05680.1 unnamed protein product [Triticum turgidum subsp. durum] [Triticum turgidum]
TraesCS7D02G520300	212	242	202	846	714	610	7.67	6.45	5.49	23	24.12	19.59	6.53666666666667	22.2366666666667	1.7663135057754	3.17364454531195e-42	1.6729109548716e-39	ERD7	XP_020188510.1 senescence/dehydration-associated protein At3g51250-like [Aegilops tauschii subsp. tauschii] [Aegilops tauschii]
TraesCS3B02G400800	17	8	13	286	277	163	0.7	0.31	0.49	11	11.6	6.94	0.5	9.84666666666667	4.29963542026891	3.60110835775062e-42	1.88972601901656e-39	HSPRO1	VAH81887.1 unnamed protein product [Triticum turgidum subsp. durum] [Triticum turgidum]
TraesCS7B02G187600	688	775	794	1670	1669	1456	12.94	13.75	13.35	29.47	32.13	28.36	13.3466666666667	29.9866666666667	1.16784168694182	4.64859313745729e-42	2.4285163666586e-39	NAC014	VAI87772.1 unnamed protein product [Triticum turgidum subsp. durum] [Triticum turgidum]
TraesCS6A02G271300	48	44	45	325	330	238	1.23	1.07	1.04	7.84	8.68	6.34	1.11333333333333	7.62	2.77490539574043	8.84735683371652e-42	4.601490628423e-39	CYP707A5	BAN28254.1 ABA 8'-hydroxylase [Triticum aestivum]
TraesCS1D02G173800	33	14	48	363	305	254	1.32	0.53	1.72	13.63	12.48	10.55	1.19	12.22	3.36021080651079	9.21015505188008e-42	4.76898568354473e-39	NHL6	XP_020183289.1 NDR1/HIN1-like protein 13 isoform X1 [Aegilops tauschii subsp. tauschii] [Aegilops tauschii]
TraesCS4A02G110100	16	16	20	207	223	185	0.58	0.54	0.65	7	8.24	6.9	0.59	7.38	3.64483395669856	1.030151809425e-41	5.31059141156529e-39	Os03g0292100	VAH89857.1 unnamed protein product [Triticum turgidum subsp. durum] [Triticum turgidum]
TraesCS3A02G488400	46	63	95	417	407	323	2.65	3.44	4.91	22.66	24.11	19.36	3.66666666666667	22.0433333333333	2.58780137782451	1.03956684372528e-41	5.33562242045699e-39	CML15	VAH69141.1 unnamed protein product [Triticum turgidum subsp. durum] [Triticum turgidum]
TraesCS5B02G219700	172	160	191	725	693	503	7.85	6.89	7.8	31.07	32.37	23.79	7.51333333333333	29.0766666666667	1.95233687416906	1.13117206322573e-41	5.78043743156339e-39	TET7	VAI32659.1 unnamed protein product [Triticum turgidum subsp. durum] [Triticum turgidum]
TraesCS6A02G259200	28	24	41	257	216	245	1.22	0.98	1.59	10.48	9.6	11.03	1.26333333333333	10.37	3.03710864136329	1.65880578495789e-41	8.43985958988447e-39	ATL34	VAI48095.1 unnamed protein product [Triticum turgidum subsp. durum] [Triticum turgidum]
TraesCS2A02G104600	2	6	15	259	227	173	0.04	0.12	0.29	5.2	4.97	3.83	0.15	4.66666666666667	4.95935801550266	2.02185779693249e-41	1.024250403085e-38	--	VAH26406.1 unnamed protein product [Triticum turgidum subsp. durum] [Triticum turgidum]
TraesCS1B02G423600	205	228	258	693	682	591	7.32	7.68	8.24	23.23	24.92	21.87	7.74666666666667	23.34	1.59115699302398	2.49089983235404e-41	1.25642275940403e-38	DNAJB4	VAH22809.1 unnamed protein product [Triticum turgidum subsp. durum] [Triticum turgidum]
TraesCS2D02G157800	18	27	28	245	230	193	0.57	0.8	0.79	7.23	7.4	6.29	0.72	6.97333333333333	3.27577963408347	2.82416368946168e-41	1.41840894106517e-38	CYP709B1	XP_020184145.1 cytochrome P450 709B1-like [Aegilops tauschii subsp. tauschii] [Aegilops tauschii]
TraesCS2B02G333600	79	75	76	397	416	306	1.32	1.18	1.13	6.22	7.1	5.3	1.21	6.20666666666667	2.35881161956304	3.34466802350737e-41	1.67264846772171e-38	Os04g0447100	QBG67103.1 lipoxygenase-like protein [Triticum aestivum]
TraesCS7A02G299600	590	689	753	1624	1721	1392	12.01	13.27	13.76	31.11	35.88	29.41	13.0133333333333	32.1333333333333	1.30408009355444	5.81557561889145e-41	2.8959586811656e-38	NAC014	VAI75832.1 unnamed protein product [Triticum turgidum subsp. durum] [Triticum turgidum]
TraesCS3D02G341100	7	11	8	194	209	174	0.18	0.27	0.18	4.66	5.48	4.61	0.21	4.91666666666667	4.54921931563665	7.05646539001496e-41	3.49899022402682e-38	WRKY24	XP_020154000.1 WRKY transcription factor WRKY24-like [Aegilops tauschii subsp. tauschii] [Aegilops tauschii]
TraesCS1D02G236200	248	225	284	956	874	654	5.15	4.39	5.31	18.71	18.61	14.11	4.95	17.1433333333333	1.79214722266433	8.34312976067399e-41	4.11953472934005e-38	BON3	XP_020172309.1 protein BONZAI 3-like isoform X1 [Aegilops tauschii subsp. tauschii] [Aegilops tauschii]
TraesCS6B02G347200	16	16	15	318	249	158	0.67	0.63	0.56	12.53	10.67	6.87	0.62	10.0233333333333	4.01495034146597	1.12778785025721e-40	5.54520965599995e-38	PHI-1	XP_020171835.1 protein EXORDIUM-like [Aegilops tauschii subsp. tauschii] [Aegilops tauschii]
TraesCS3B02G229900	283	300	326	842	837	704	2.51	2.5	2.59	7	7.59	6.46	2.53333333333333	7.01666666666667	1.46974890962281	1.58521092526909e-40	7.76169677392634e-38	ufd1	CDM83056.1 unnamed protein product [Triticum aestivum]
TraesCS2A02G467300	869	836	968	1937	1693	1671	21.2	19.24	21.13	44.37	42.27	42.26	20.5233333333333	42.9666666666667	1.06595279003393	2.7754198182332e-40	1.35327157487202e-37	PAO3	XP_020174159.1 probable polyamine oxidase 2 [Aegilops tauschii subsp. tauschii] [Aegilops tauschii]
TraesCS4B02G104900	336	357	422	1072	1011	827	7.61	8.19	9.26	20.56	23.19	18.65	8.35333333333333	20.8	1.31615961442775	4.28908521448462e-40	2.08264452269469e-37	MAPKKK3	VAI03346.1 unnamed protein product [Triticum turgidum subsp. durum] [Triticum turgidum]
TraesCS2B02G478100	454	516	540	1290	1542	1156	10.56	11.31	11.23	28.16	36.7	27.85	11.0333333333333	30.9033333333333	1.48589374395761	5.31772280592648e-40	2.57144858758317e-37	CPK13	VAH51821.1 unnamed protein product [Triticum turgidum subsp. durum] [Triticum turgidum]
TraesCS7A02G369500	163	135	146	571	486	465	14.84	11.6	11.92	48.82	45.26	43.84	12.7866666666667	45.9733333333333	1.84615705407096	5.82127275742839e-40	2.80336206016373e-37	MBF1C	KAE8809816.1 multiprotein bridging factor 1 [Hordeum vulgare]
TraesCS3D02G115000	0	5	10	198	242	218	0	0.33	0.62	12.94	17.25	15.72	0.316666666666667	15.3033333333333	5.59473710838141	6.25484952620895e-40	2.99981557891813e-37	HSP18	XP_020189626.1 17.5 kDa class II heat shock protein-like [Aegilops tauschii subsp. tauschii] [Aegilops tauschii]
TraesCS2D02G313400	134	123	111	452	463	430	2.3	2	1.71	7.32	8.18	7.69	2.00333333333333	7.73	1.94806592393482	6.45889437645629e-40	3.08503158253742e-37	Os04g0447100	SPT18543.1 unnamed protein product [Triticum aestivum]
TraesCS1B02G136700	120	115	135	445	469	400	8.57	6.97	8.52	27.72	30.75	26.6	8.02	28.3566666666667	1.82201381158477	7.53954367891085e-40	3.58655479834758e-37	ERD15	XP_020186168.1 protein EARLY RESPONSIVE TO DEHYDRATION 15-like [Aegilops tauschii subsp. tauschii] [Aegilops tauschii]
TraesCS7B02G221700	221	177	209	819	753	568	10.42	7.89	8.82	36.34	36.42	27.81	9.04333333333333	33.5233333333333	1.89023906109972	1.00670129344309e-39	4.76948173122663e-37	BC10	VAI88513.1 unnamed protein product [Triticum turgidum subsp. durum] [Triticum turgidum]
TraesCS4A02G098000LC	54	46	66	276	369	309	5.51	4.48	6.03	26.59	38.72	32.82	5.34	32.71	2.61482011239522	1.23132483883257e-39	5.81016513265587e-37	--	BAF11577.1 Os03g0267100 [Oryza sativa Japonica Group]
TraesCS1A02G188700	115	86	147	494	494	426	4.61	3.26	5.28	18.63	20.29	17.71	4.38333333333333	18.8766666666667	2.10650373030792	1.52730103175636e-39	7.17782415012824e-37	PP2A13	VAH17104.1 unnamed protein product [Triticum turgidum subsp. durum] [Triticum turgidum]
TraesCS5D02G279100	85	91	107	437	365	334	2.04	2.16	2.2	9.62	8.94	8.19	2.13333333333333	8.91666666666667	2.06339508128851	1.55404091169431e-39	7.27427902273164e-37	NAC017	AZZ83990.1 SIN [Thinopyrum ponticum x Triticum aestivum]
TraesCS2B02G404400	256	259	240	694	659	660	6.08	5.8	5.1	15.49	16.03	16.26	5.66	15.9266666666667	1.4925703949033	1.69680924836762e-39	7.91091680726996e-37	HOP	VAH49985.1 unnamed protein product [Triticum turgidum subsp. durum] [Triticum turgidum]
TraesCS2D02G270100	355	347	393	1002	772	945	12.6	11.62	12.48	33.43	28.06	34.8	12.2333333333333	32.0966666666667	1.39160591465214	2.12113119800719e-39	9.84996091480941e-37	LBD41	XP_020176408.1 LOB domain-containing protein 40-like [Aegilops tauschii subsp. tauschii] [Aegilops tauschii]
TraesCS7D02G200600	113	81	129	466	439	397	4.01	2.7	4.08	15.49	15.89	14.55	3.59666666666667	15.31	2.08974191873293	2.6553999165138e-39	1.22822217008015e-36	GATL9	XP_020169550.1 probable galacturonosyltransferase-like 9 [Aegilops tauschii subsp. tauschii] [Aegilops tauschii]
TraesCS7B02G388700	5	5	11	165	294	209	0.07	0.06	0.13	2.04	3.99	2.85	0.0866666666666667	2.96	5.09397614820901	3.24899656786608e-39	1.4968664423812e-36	BAG6	VAI92489.1 unnamed protein product [Triticum turgidum subsp. durum] [Triticum turgidum]
TraesCS4A02G007800	20	17	12	222	177	185	1.17	0.94	0.63	12.2	10.61	11.22	0.913333333333333	11.3433333333333	3.63455935300448	3.29574089834032e-39	1.51244780943365e-36	TIFY11B	VAH86979.1 unnamed protein product [Triticum turgidum subsp. durum] [Triticum turgidum]
TraesCS2B02G507200	18	17	28	289	217	175	1.13	1	1.57	16.99	13.91	11.36	1.23333333333333	14.0866666666667	3.51369559141864	3.43573412622843e-39	1.57053312077931e-36	--	XP_020150934.1 uncharacterized protein LOC109736127 [Aegilops tauschii subsp. tauschii] [Aegilops tauschii]
TraesCS2A02G271300	344	360	363	896	757	863	13.96	13.81	13.21	34.2	31.49	36.36	13.66	34.0166666666667	1.31628429290884	3.51795442613916e-39	1.60186016675353e-36	LBD41	VAH31305.1 unnamed protein product [Triticum turgidum subsp. durum] [Triticum turgidum]
TraesCS1A02G069600	93	80	76	437	339	335	2.29	1.86	1.68	10.11	8.56	8.55	1.94333333333333	9.07333333333333	2.2230992783035	3.59041340586074e-39	1.62851688984742e-36	Os05g0128200	XP_020199267.1 zinc finger CCCH domain-containing protein 33-like [Aegilops tauschii subsp. tauschii] [Aegilops tauschii]
TraesCS4A02G094300	42	38	49	337	228	250	1.45	1.24	1.52	10.96	8.08	8.97	1.40333333333333	9.33666666666667	2.73404984500811	5.47406459504543e-39	2.47330496927184e-36	PP2C30	AMQ26207.1 serine/threonine protein phosphatase 2C 30 [Triticum aestivum]
TraesCS4B02G297100	20	15	33	214	245	200	1.18	0.84	1.74	11.87	14.81	12.25	1.25333333333333	12.9766666666667	3.37207777766965	6.7703547737366e-39	3.04723252435463e-36	TIFY11B	VAI09551.1 unnamed protein product [Triticum turgidum subsp. durum] [Triticum turgidum]
TraesCS4A02G293000	3605	4001	4673	1821	1620	1857	175.65	184	203.73	83.33	80.81	93.78	187.793333333333	85.9733333333333	-1.12718	6.83547719296443e-39	3.06475560182024e-36	blt801	VAH95842.1 unnamed protein product [Triticum turgidum subsp. durum] [Triticum turgidum]
TraesCS1B02G242400	48	62	54	317	366	255	1.28	1.56	1.29	7.93	9.98	7.04	1.37666666666667	8.31666666666667	2.59482612880517	6.88911577548276e-39	3.07701567281887e-36	Os05g0358500	VAH18408.1 unnamed protein product [Triticum turgidum subsp. durum] [Triticum turgidum]
TraesCS4D02G357900	15	6	10	413	685	487	0.2	0.07	0.12	4.97	9	6.48	0.13	6.81666666666667	5.71248290896686	9.0102849751274e-39	4.00913143862874e-36	BAG6	XP_020158050.1 BAG family molecular chaperone regulator 6 isoform X1 [Aegilops tauschii subsp. tauschii] [Aegilops tauschii]
TraesCS4D02G303200	69	38	81	349	371	332	4.32	2.24	4.53	20.5	23.75	21.52	3.69666666666667	21.9233333333333	2.56817030477271	1.54148215624585e-38	6.83285321546217e-36	--	-
TraesCS5A02G401600	20	19	35	205	209	226	0.63	0.56	0.99	6.06	6.72	7.37	0.726666666666667	6.71666666666667	3.2083797986384	1.72641511022928e-38	7.62371883129249e-36	HHO6	AEV91184.1 MYB-related protein [Triticum aestivum]
TraesCS7B02G104200	183	154	209	662	578	507	4.89	3.89	5.01	16.63	15.83	14.06	4.59666666666667	15.5066666666667	1.75422863995924	3.32987940942461e-38	1.46492160996123e-35	GATL9	XP_020169550.1 probable galacturonosyltransferase-like 9 [Aegilops tauschii subsp. tauschii] [Aegilops tauschii]
TraesCS7A02G063300	56	69	71	430	414	261	1.54	1.79	1.74	11.08	11.63	7.43	1.69	10.0466666666667	2.57162176459449	3.81801116244254e-38	1.67337566386274e-35	XTH8	EMS57409.1 Xyloglucan endotransglycosylase/hydrolase protein 8 [Triticum urartu]
TraesCS6A02G209000	222	235	274	718	713	590	5.9	5.91	6.53	17.95	19.42	16.28	6.11333333333333	17.8833333333333	1.54858453204883	3.96010635696458e-38	1.72917748546533e-35	--	VAI46541.1 unnamed protein product [Triticum turgidum subsp. durum] [Triticum turgidum]
TraesCS4B02G243400	32	27	25	205	333	240	0.79	0.63	0.55	4.76	8.43	6.16	0.656666666666667	6.45	3.2960660315754	4.65006278790499e-38	2.02289831809003e-35	HSP70-8	VAI08281.1 unnamed protein product [Triticum turgidum subsp. durum] [Triticum turgidum]
TraesCS2B02G121600	30	18	47	259	314	231	0.57	0.32	0.8	4.65	6.14	4.58	0.563333333333333	5.12333333333333	3.18502201340859	4.80524475978282e-38	2.08266426770113e-35	--	VAH42170.1 unnamed protein product [Triticum turgidum subsp. durum] [Triticum turgidum]
TraesCS7B02G083500	13	24	19	194	176	206	0.73	1.27	0.95	10.19	10.07	11.94	0.983333333333333	10.7333333333333	3.44827382875277	5.85722070655451e-38	2.52923867720451e-35	HSP26.2	VAI84289.1 unnamed protein product [Triticum turgidum subsp. durum] [Triticum turgidum]
TraesCS7D02G031900	10397	9555	10933	4415	4662	4120	216.05	187.39	203.3	86.16	99.17	88.73	202.246666666667	91.3533333333333	-1.14659	7.17272981114822e-38	3.08590877926539e-35	--	XP_020147247.1 uncharacterized protein LOC109732492 [Aegilops tauschii subsp. tauschii] [Aegilops tauschii]
TraesCS6A02G410800	18	13	31	243	203	183	0.73	0.5	1.12	9.22	8.4	7.66	0.783333333333333	8.42666666666667	3.4272638016121	7.58365672496681e-38	3.25074973358632e-35	--	XP_020173374.1 uncharacterized protein LOC109758922 [Aegilops tauschii subsp. tauschii] [Aegilops tauschii]
TraesCS7D02G052400	11	9	12	206	221	143	0.57	0.44	0.56	10.08	11.79	7.73	0.523333333333333	9.86666666666667	4.23676071162469	9.64298156989217e-38	4.1183977710654e-35	DREB1C	XP_020162370.1 dehydration-responsive element-binding protein 1C-like [Aegilops tauschii subsp. tauschii] [Aegilops tauschii]
TraesCS1D02G030300	95	78	117	377	427	372	3.39	2.62	3.74	12.67	15.65	13.8	3.25	14.04	2.11103131238874	1.07688562631599e-37	4.58252035500908e-35	RHC2A	XP_020179053.1 E3 ubiquitin-protein ligase RDUF1-like [Aegilops tauschii subsp. tauschii] [Aegilops tauschii]
TraesCS7B02G327700	69	79	102	475	448	302	2.69	2.89	3.54	17.25	17.75	12.13	3.04	15.71	2.36953995185061	1.15953464134308e-37	4.91634285504528e-35	XTH23	VAI91268.1 unnamed protein product [Triticum turgidum subsp. durum] [Triticum turgidum]
TraesCS7A02G253900	52	37	53	372	313	228	2.07	1.41	1.83	13.69	12.6	9.31	1.77	11.8666666666667	2.74509347504961	1.48039001826786e-37	6.25408666851052e-35	ORP4C	VAI74191.1 unnamed protein product [Triticum turgidum subsp. durum] [Triticum turgidum]
TraesCS3B02G045500	37	32	36	322	313	190	1.28	1.04	1.11	10.42	11.05	6.79	1.14333333333333	9.42	3.04248098416113	1.90399567914515e-37	8.01472598434979e-35	CML16	CDM80751.1 unnamed protein product [Triticum aestivum]
TraesCS1B02G196600	100	110	106	468	404	338	4.01	4.16	3.81	17.61	16.57	14.04	3.99333333333333	16.0733333333333	2.00900374281374	2.00731481257924e-37	8.41935462357161e-35	RBL1	VAH17109.1 unnamed protein product [Triticum turgidum subsp. durum] [Triticum turgidum]
TraesCS7D02G067400	33	22	59	296	374	255	3.19	2.01	5.11	26.88	37.02	25.56	3.43666666666667	29.82	3.11719842563649	2.57081044321196e-37	1.07443349887696e-34	--	XP_020174943.1 uncharacterized protein LOC109760545 [Aegilops tauschii subsp. tauschii] [Aegilops tauschii]
TraesCS7D02G317600	185	233	236	862	786	558	3.74	4.46	4.28	16.39	16.3	11.72	4.16	14.8033333333333	1.83126663710486	2.74254793253685e-37	1.1421296945243e-34	BC10	XP_020162893.1 uncharacterized protein LOC109748268 [Aegilops tauschii subsp. tauschii] [Aegilops tauschii]
TraesCS1B02G119600	13	20	18	186	257	170	0.5	0.77	0.64	6.96	10.48	7.01	0.636666666666667	8.15	3.67818992180385	5.9272657276283e-37	2.4596471275834e-34	CDKF-2	VAH14566.1 unnamed protein product [Triticum turgidum subsp. durum] [Triticum turgidum]
TraesCS1D02G102400	1113	956	1236	2917	2519	2143	46.24	37.49	45.95	113.8	107.12	92.26	43.2266666666667	104.393333333333	1.27203608759918	1.60884436191103e-36	6.65265671093825e-34	OsI_017815	XP_020165753.1 REF/SRPP-like protein OsI_017815 [Aegilops tauschii subsp. tauschii] [Aegilops tauschii]
TraesCS2D02G276900	377	422	453	1006	1141	909	14.92	15.75	16.05	37.4	46.2	37.3	15.5733333333333	40.3	1.37170206525647	2.34286338214858e-36	9.65375206710532e-34	CEQORH	XP_020173381.1 putative quinone-oxidoreductase homolog, chloroplastic [Aegilops tauschii subsp. tauschii] [Aegilops tauschii]
TraesCS4B02G210100	39	28	40	291	221	207	1.37	0.93	1.26	9.62	7.97	7.56	1.18666666666667	8.38333333333333	2.82060925372649	2.44189951443677e-36	1.00265250869621e-33	PP2C30	AMQ26207.1 serine/threonine protein phosphatase 2C 30 [Triticum aestivum]
TraesCS4D02G257900	133	122	122	405	514	457	1.89	1.64	1.55	5.41	7.47	6.72	1.69333333333333	6.53333333333333	1.94795325223041	2.9610125460265e-36	1.21155108447942e-33	ACA10	XP_020159180.1 calcium-transporting ATPase 1, plasma membrane-type-like [Aegilops tauschii subsp. tauschii] [Aegilops tauschii]
TraesCS7B02G146400	423	360	417	1030	1008	875	17.86	14.33	15.74	40.8	43.52	38.25	15.9766666666667	40.8566666666667	1.3546050658722	5.90683709501478e-36	2.40846651753596e-33	SAP1	VAI86164.1 unnamed protein product [Triticum turgidum subsp. durum] [Triticum turgidum]
TraesCS2B02G603600	68	41	43	328	319	256	2.88	1.62	1.61	13	13.79	11.2	2.03666666666667	12.6633333333333	2.63637542684629	9.65438992474948e-36	3.92283339504873e-33	CAF1-11	VAH54684.1 unnamed protein product [Triticum turgidum subsp. durum] [Triticum turgidum]
TraesCS6A02G266100	153	134	183	629	593	437	4.81	3.98	5.15	18.57	19.1	14.24	4.64666666666667	17.3033333333333	1.8967819265234	9.72937002908179e-36	3.93962055205263e-33	XTH30	VAI48258.1 unnamed protein product [Triticum turgidum subsp. durum] [Triticum turgidum]
TraesCS7D02G540700	11	10	9	171	148	166	0.44	0.37	0.36	6.92	6	7.38	0.39	6.76666666666667	4.11689929248914	1.20231842141589e-35	4.85164504520449e-33	RVE2	XP_020180978.1 protein LHY-like isoform X1 [Aegilops tauschii subsp. tauschii] [Aegilops tauschii]
TraesCS4D02G296000	6	0	4	224	218	200	0.37	0	0.22	13	13.79	12.81	0.196666666666667	13.2	6.06864166560513	1.21862960529085e-35	4.90056610551017e-33	TIFY11B	XP_020167958.1 protein TIFY 11b-like [Aegilops tauschii subsp. tauschii] [Aegilops tauschii]
TraesCS2D02G543900	61	44	50	272	279	251	2.32	1.57	1.7	9.68	10.84	9.86	1.86333333333333	10.1266666666667	2.4422016816589	1.45919375434116e-35	5.84786888768874e-33	ERF3	XP_020148569.1 ethylene-responsive transcription factor 3-like [Aegilops tauschii subsp. tauschii] [Aegilops tauschii]
TraesCS7D02G128300	108	110	133	415	401	358	3.82	3.66	4.19	13.72	14.44	13.06	3.89	13.74	1.82053994383191	1.61258251231129e-35	6.44053347289049e-33	At3g15890	XP_020159011.1 PTI1-like tyrosine-protein kinase At3g15890 [Aegilops tauschii subsp. tauschii] [Aegilops tauschii]
TraesCS2B02G603100	91	89	108	431	408	308	8.27	7.64	8.75	36.8	37.96	29.02	8.22	34.5933333333333	2.07328373613591	1.83810728393316e-35	7.31629219661313e-33	NHL10	VAH54659.1 unnamed protein product [Triticum turgidum subsp. durum] [Triticum turgidum]
TraesCS7A02G306600	128	119	142	507	401	388	3.23	2.84	3.21	12	10.35	10.15	3.09333333333333	10.8333333333333	1.8082430076756	2.30270140122448e-35	9.13446519912173e-33	NDB2	VAI76045.1 unnamed protein product [Triticum turgidum subsp. durum] [Triticum turgidum]
TraesCS4B02G205700	146	162	201	610	722	480	3.54	3.72	4.38	13.94	17.99	12.1	3.88	14.6766666666667	1.91939578602861	2.38453144840529e-35	9.42711618767851e-33	HSP70	VAI06780.1 unnamed protein product [Triticum turgidum subsp. durum] [Triticum turgidum]
TraesCS4B02G049800	817	721	840	1658	1751	1558	13.03	10.84	11.98	24.81	28.57	25.74	11.95	26.3733333333333	1.14206930716984	2.79287806859242e-35	1.10043157354486e-32	TMK1	VAI01702.1 unnamed protein product [Triticum turgidum subsp. durum] [Triticum turgidum]
TraesCS1B02G097700	405	416	545	1047	1152	1015	7.27	7.05	8.75	17.64	21.15	18.88	7.69	19.2233333333333	1.32180301837414	2.83507626539925e-35	1.11330971385755e-32	At2g47060	EMS68085.1 Pto-interacting protein 1 [Triticum urartu]
TraesCS6B02G407500	120	110	96	468	418	353	2.72	2.34	1.94	9.91	9.65	8.25	2.33333333333333	9.27	1.99017691751436	2.98436498414238e-35	1.16801457917829e-32	At5g35200	VAI62496.1 unnamed protein product [Triticum turgidum subsp. durum] [Triticum turgidum]
TraesCS2D02G207400	148	139	174	471	488	435	3.4	3.01	3.57	10.16	11.46	10.35	3.32666666666667	10.6566666666667	1.67960702344326	3.98970983343874e-35	1.55627941376223e-32	CPK20	ALV66759.1 calcium-dependent protein kinase 7-D [Triticum aestivum]
TraesCS3B02G525200	22	31	17	179	204	235	1.07	1.43	0.74	8.2	10.18	11.88	1.08	10.0866666666667	3.22334626933212	4.04074393551142e-35	1.57094995621733e-32	LFG4	VAH84992.1 unnamed protein product [Triticum turgidum subsp. durum] [Triticum turgidum]
TraesCS5B02G404000	291	239	327	909	788	683	10.4	8.07	10.45	30.5	28.81	25.29	9.64	28.2	1.54859011105619	4.24407765224648e-35	1.64453793053373e-32	BIPP2C2	VAI37044.1 unnamed protein product [Triticum turgidum subsp. durum] [Triticum turgidum]
TraesCS5A02G429700LC	273	299	279	873	856	644	11.13	11.52	10.17	33.41	35.74	27.24	10.94	32.13	1.55430824267886	4.88131245255703e-35	1.88521764298062e-32	--	PUZ51901.1 hypothetical protein GQ55_6G228300 [Panicum hallii var. hallii] [Panicum hallii]
TraesCS7D02G438400	123	133	148	506	403	390	11.72	11.96	12.62	45.27	39.3	38.51	12.1	41.0266666666667	1.76155489545043	5.08182695922932e-35	1.95620248165439e-32	--	XP_020193913.1 uncharacterized protein LOC109779673 [Aegilops tauschii subsp. tauschii] [Aegilops tauschii]
TraesCS5D02G266000	8	9	5	148	178	166	0.39	0.41	0.22	6.74	8.83	8.34	0.34	7.97	4.55097307274013	5.1523136247389e-35	1.9768329344072e-32	HSP21	XP_020200288.1 small heat shock protein, chloroplastic-like [Aegilops tauschii subsp. tauschii] [Aegilops tauschii]
TraesCS7D02G243700	373	367	399	962	992	796	20.93	19.47	20.06	50.77	57.04	46.37	20.1533333333333	51.3933333333333	1.35056274905939	5.37479635879578e-35	2.05545561927778e-32	SAP1	XP_020180822.1 zinc finger A20 and AN1 domain-containing stress-associated protein 11-like [Aegilops tauschii subsp. tauschii] [Aegilops tauschii]
TraesCS4D02G303400	90	75	108	453	366	313	6.26	4.92	6.72	29.6	26.05	22.57	5.96666666666667	26.0733333333333	2.12757794858132	5.6501591518001e-35	2.15372288033209e-32	--	-
TraesCS2A02G194500	51	35	50	251	230	254	2.22	1.44	1.94	10.24	10.24	11.43	1.86666666666667	10.6366666666667	2.51050987633435	6.77672692424082e-35	2.57476018872893e-32	LBD37	VAH28650.1 unnamed protein product [Triticum turgidum subsp. durum] [Triticum turgidum]
TraesCS3A02G454300	141	121	110	595	501	387	6.11	4.95	4.27	24.22	22.24	17.38	5.11	21.28	2.05810295456357	7.91851598111124e-35	2.99883681922848e-32	SRC2	VAH68445.1 unnamed protein product [Triticum turgidum subsp. durum] [Triticum turgidum]
TraesCS2B02G602700	106	93	119	450	409	329	4.22	3.49	4.23	16.8	16.65	13.56	3.98	15.67	1.97716484392893	8.1428321809966e-35	3.07384034672447e-32	--	SPT21211.1 unnamed protein product [Triticum aestivum]
TraesCS4D02G324800	298	268	292	776	698	652	5.06	4.62	4.61	13.02	13.29	11.89	4.76333333333333	12.7333333333333	1.41856672182729	1.14582337905157e-34	4.31146442004413e-32	RBOHC	XP_020164916.1 respiratory burst oxidase homolog protein B-like [Aegilops tauschii subsp. tauschii] [Aegilops tauschii]
TraesCS7A02G427600	292	281	325	996	935	671	12.02	10.92	11.99	38.52	39.42	28.64	11.6433333333333	35.5266666666667	1.60939819036518	1.18104399251418e-34	4.4297477593588e-32	XTH23	VAI79222.1 unnamed protein product [Triticum turgidum subsp. durum] [Triticum turgidum]
TraesCS4A02G035900	34	23	48	304	239	201	1.14	0.72	1.43	9.53	8.17	6.96	1.09666666666667	8.22	2.90601331066759	1.35734139552452e-34	5.07472219766996e-32	HIPP05	EMS49696.1 hypothetical protein TRIUR3_28781 [Triticum urartu]
TraesCSU02G034700	549	604	577	182	139	163	23.62	24.52	22.23	7.36	6.13	7.27	23.4566666666667	6.92	-1.76115	1.5156725123964e-34	5.648631488715e-32	--	XP_020197271.1 uncharacterized protein LOC109783076 isoform X1 [Aegilops tauschii subsp. tauschii] [Aegilops tauschii]
TraesCS2A02G251800	295	324	370	855	829	697	8.8	9.11	9.87	23.94	25.31	21.54	9.26	23.5966666666667	1.34949897611104	2.07909587383951e-34	7.72380816979198e-32	CIPK23	AEZ51507.1 CBL-interacting protein kinase 23 [Hordeum vulgare subsp. spontaneum] [Hordeum vulgare]
TraesCS3A02G096200	228	256	281	629	647	602	4.63	4.92	5.11	12	13.47	12.68	4.88666666666667	12.7166666666667	1.37979795358808	2.12055498083851e-34	7.85289825847101e-32	NET4A	VAH57422.1 unnamed protein product [Triticum turgidum subsp. durum] [Triticum turgidum]
TraesCS4A02G066100	19	13	21	153	264	202	0.62	0.4	0.62	4.71	8.86	6.86	0.546666666666667	6.81	3.63892148411514	2.45858383107877e-34	9.07597467130914e-32	HSP70-8	VAH88251.1 unnamed protein product [Triticum turgidum subsp. durum] [Triticum turgidum]
TraesCS5D02G038800	14	12	35	210	195	191	0.31	0.25	0.69	4.41	4.48	4.43	0.416666666666667	4.44	3.41359408240917	2.77444561274808e-34	1.02097853614782e-31	NCED5	AGO64765.1 9-cis-epoxycarotenoid dioxygenase [Aegilops tauschii]
TraesCSU02G153000	32	23	19	210	172	217	0.65	0.45	0.35	4.05	3.62	4.61	0.483333333333333	4.09333333333333	3.08218575535524	2.97053294061489e-34	1.08971067641578e-31	RGA4	XP_020188460.1 putative disease resistance protein RGA4 [Aegilops tauschii subsp. tauschii] [Aegilops tauschii]
TraesCS2B02G180000	7	3	9	175	215	135	0.2	0.08	0.22	4.59	6.14	3.91	0.166666666666667	4.88	4.87184364850931	3.26968310843796e-34	1.19570267723633e-31	IQM2	VAH43468.1 unnamed protein product [Triticum turgidum subsp. durum] [Triticum turgidum]
TraesCS3A02G440800	278	270	278	839	919	643	11.46	10.51	10.24	32.43	38.72	27.43	10.7366666666667	32.86	1.61378632028841	3.73132365048852e-34	1.36027089167435e-31	Os01g0926700	VAH68135.1 unnamed protein product [Triticum turgidum subsp. durum] [Triticum turgidum]
TraesCS1D02G117900	58	54	67	309	231	277	3.43	3.01	3.59	17.25	14.05	17.02	3.34333333333333	16.1066666666667	2.2682988487129	5.22467935689803e-34	1.89288677307406e-31	ERD15	XP_020186168.1 protein EARLY RESPONSIVE TO DEHYDRATION 15-like [Aegilops tauschii subsp. tauschii] [Aegilops tauschii]
TraesCS2D02G383600	604	634	600	1208	1291	1318	15.31	15.18	13.62	28.76	33.5	34.63	14.7033333333333	32.2966666666667	1.13524201259016	5.89196423914144e-34	2.12805382466916e-31	HOP	XP_020180236.1 hsp70-Hsp90 organizing protein [Aegilops tauschii subsp. tauschii] [Aegilops tauschii]
TraesCS2B02G401300	6	9	7	162	183	135	0.11	0.15	0.11	2.73	3.37	2.52	0.123333333333333	2.87333333333333	4.54209069346015	6.55161550009028e-34	2.35902507400482e-31	RPS2	VAH49910.1 unnamed protein product [Triticum turgidum subsp. durum] [Triticum turgidum]
TraesCS6A02G316700	22	29	19	229	224	156	0.86	1.06	0.66	8.36	8.94	6.29	0.86	7.86333333333333	3.19273244781621	7.12152203260576e-34	2.55636426779016e-31	PHI-1	XP_020171835.1 protein EXORDIUM-like [Aegilops tauschii subsp. tauschii] [Aegilops tauschii]
TraesCS3A02G375500	20	11	27	231	185	159	0.88	0.46	1.06	9.55	8.35	7.27	0.8	8.39	3.39059890555246	7.89214773354695e-34	2.82432694824199e-31	DIVARICATA	VAH82116.1 unnamed protein product [Triticum turgidum subsp. durum] [Triticum turgidum]
TraesCS7B02G104600	48	53	42	241	250	235	1.16	1.21	0.91	5.47	6.19	5.9	1.09333333333333	5.85333333333333	2.42052512491728	8.72406378185943e-34	3.11252253622181e-31	GLU10	XP_020150705.1 endoglucanase 16-like [Aegilops tauschii subsp. tauschii] [Aegilops tauschii]
TraesCS7D02G295100	659	710	695	1506	1505	1257	13.85	13.93	13.28	29.57	32.45	27.93	13.6866666666667	29.9833333333333	1.13138965403024	9.40804228123537e-34	3.3362058298022e-31	NAC014	XP_020181255.1 protein NTM1-like 9 isoform X1 [Aegilops tauschii subsp. tauschii] [Aegilops tauschii]
TraesCS1D02G199000	36	54	58	293	220	247	0.53	0.75	0.76	4.04	3.31	3.76	0.68	3.70333333333333	2.4452177594176	9.69796656460948e-34	3.42862671699012e-31	JMJ706	XP_020198853.1 lysine-specific demethylase JMJ706-like [Aegilops tauschii subsp. tauschii] [Aegilops tauschii]
TraesCS1D02G072200	78	107	102	361	393	319	2.45	3.18	2.87	10.66	12.63	10.4	2.83333333333333	11.23	1.98678568209669	9.95172375356429e-34	3.50774282255904e-31	Os05g0128200	XP_020199267.1 zinc finger CCCH domain-containing protein 33-like [Aegilops tauschii subsp. tauschii] [Aegilops tauschii]
TraesCS4A02G116100	84	126	99	354	423	396	2.63	3.75	2.77	10.44	13.58	12.89	3.05	12.3033333333333	2.0121680890742	1.19742841158678e-33	4.20797199942067e-31	XXT1	VAH90022.1 unnamed protein product [Triticum turgidum subsp. durum] [Triticum turgidum]
TraesCS7D02G207300	79	88	101	346	328	296	2.26	2.38	2.58	9.29	9.6	8.78	2.40666666666667	9.22333333333333	1.93825190172278	1.90362803488296e-33	6.6696514939543e-31	--	XP_020183743.1 uncharacterized protein LOC109769407 [Aegilops tauschii subsp. tauschii] [Aegilops tauschii]
TraesCS7B02G450100	128	108	147	485	427	370	4.26	3.39	4.38	15.16	14.54	12.76	4.01	14.1533333333333	1.8194677287293	2.22093270695315e-33	7.75814887262899e-31	ERD7	VAI93567.1 unnamed protein product [Triticum turgidum subsp. durum] [Triticum turgidum]
TraesCS4A02G405300	85	51	87	359	494	326	7.91	4.48	7.25	31.39	47.08	31.46	6.54666666666667	36.6433333333333	2.48471831808238	2.55493026742074e-33	8.89830505220564e-31	--	-
TraesCS3D02G245900	222	205	205	659	665	515	9.27	8.06	7.73	25.65	28.34	22.14	8.35333333333333	25.3766666666667	1.60307866354237	2.66619953807992e-33	9.25827900134091e-31	DI19-3	XP_020165784.1 protein DEHYDRATION-INDUCED 19 homolog 3-like isoform X1 [Aegilops tauschii subsp. tauschii] [Aegilops tauschii]
TraesCS7B02G278200	1781	2129	2011	713	708	858	64.46	72.72	65.14	24.24	26.22	32.17	67.44	27.5433333333333	-1.2919	2.83483693484842e-33	9.81474224230273e-31	THI1-2	VAI90062.1 unnamed protein product [Triticum turgidum subsp. durum] [Triticum turgidum]
TraesCS4A02G211600	311	239	330	769	829	741	4.65	3.37	4.42	10.8	12.69	11.49	4.14666666666667	11.66	1.49154380379105	2.89008315953335e-33	9.97649886415669e-31	MAPKKK3	VAH93521.1 unnamed protein product [Triticum turgidum subsp. durum] [Triticum turgidum]
TraesCS4A02G405100	15	25	19	188	204	152	1.34	2.11	1.52	15.82	18.69	14.12	1.65666666666667	16.21	3.29052883467641	3.06562955308088e-33	1.05513559282538e-30	--	-
TraesCS4D02G206000	536	582	643	1309	1280	1076	11.92	12.21	12.79	27.33	29.12	24.79	12.3066666666667	27.08	1.13778768665037	3.09836395663754e-33	1.06327491769395e-30	RHM1	VAI06795.1 unnamed protein product [Triticum turgidum subsp. durum] [Triticum turgidum]
TraesCS3D02G201900	255	321	369	755	898	786	6.58	7.83	8.52	18.32	23.76	21.04	7.64333333333333	21.04	1.46086085043267	3.41874164497012e-33	1.16978942917454e-30	ufd1	XP_020201264.1 uncharacterized protein LOC109787117 [Aegilops tauschii subsp. tauschii] [Aegilops tauschii]
TraesCS1D02G254800	279	298	332	992	802	660	6.35	6.39	6.75	21.18	18.65	15.55	6.49666666666667	18.46	1.50663096310904	3.49785847976212e-33	1.19337141404876e-30	lip	XP_020161543.1 uncharacterized protein LOC109746850 [Aegilops tauschii subsp. tauschii] [Aegilops tauschii]
TraesCS4A02G050000	75	91	98	332	315	301	2.58	2.95	3.02	10.72	11.09	10.72	2.85	10.8433333333333	1.92777449726787	3.53945838213867e-33	1.20405377556579e-30	Os03g0207400	VAH87978.1 unnamed protein product [Triticum turgidum subsp. durum] [Triticum turgidum]
TraesCS6D02G248500	156	160	127	478	521	442	6.6	6.4	4.82	19.01	22.58	19.41	5.94	20.3333333333333	1.77531190581569	4.36290950201975e-33	1.4798736108561e-30	XTH30	XP_020156172.1 probable xyloglucan endotransglucosylase/hydrolase protein 30 [Aegilops tauschii subsp. tauschii] [Aegilops tauschii]
TraesCS5A02G383800	5	0	3	214	248	203	0.16	0	0.09	6.96	8.8	7.29	0.0833333333333333	7.68333333333333	6.52669484554198	5.02892143559141e-33	1.70085099490109e-30	HSFA2A	VAI21795.1 unnamed protein product [Triticum turgidum subsp. durum] [Triticum turgidum]
TraesCS5A02G263500	101	69	113	507	413	324	4.01	2.58	4.02	18.87	16.76	13.33	3.53666666666667	16.32	2.20617890177789	5.18381001833261e-33	1.74818390768103e-30	SAP1	VAI18941.1 unnamed protein product [Triticum turgidum subsp. durum] [Triticum turgidum]
TraesCS3D02G041400	33	17	46	260	292	197	1.85	0.9	2.3	13.67	16.75	11.43	1.68333333333333	13.95	3.05087232979855	5.84518182247049e-33	1.96555996330213e-30	CML16	BAJ86493.1 predicted protein, partial [Hordeum vulgare subsp. vulgare] [Hordeum vulgare]
TraesCS6A02G177700	152	149	174	485	487	412	4.01	3.72	4.11	12	13.14	11.26	3.94666666666667	12.1333333333333	1.6202693694571	6.13308423532493e-33	2.05646356271116e-30	KCS11	VAI45317.1 unnamed protein product [Triticum turgidum subsp. durum] [Triticum turgidum]
TraesCS2A02G583900	239	212	215	870	723	545	8.94	7.49	7.2	30.57	27.69	21.13	7.87666666666667	26.4633333333333	1.74833766698615	1.00855300971943e-32	3.36803743640184e-30	--	VAH39142.1 unnamed protein product [Triticum turgidum subsp. durum] [Triticum turgidum]
TraesCS5B02G260200	6	5	12	175	157	129	0.51	0.4	0.91	13.99	13.68	11.38	0.606666666666667	13.0166666666667	4.42331219283065	1.01022127478341e-32	3.36803743640184e-30	--	VAI33670.1 unnamed protein product [Triticum turgidum subsp. durum] [Triticum turgidum]
TraesCS5D02G415700	230	218	255	685	666	533	4.59	4.11	4.56	12.85	13.61	11.03	4.42	12.4966666666667	1.49942505017551	1.06050755776459e-32	3.52564532456614e-30	CSLC10	XP_020156618.1 probable xyloglucan glycosyltransferase 9 [Aegilops tauschii subsp. tauschii] [Aegilops tauschii]
TraesCS7B02G206900	171	198	186	501	523	475	4.41	4.82	4.29	12.15	13.82	12.7	4.50666666666667	12.89	1.51611961280062	1.17621101167965e-32	3.89922280478118e-30	NDB2	VAI88128.1 unnamed protein product [Triticum turgidum subsp. durum] [Triticum turgidum]
TraesCS7D02G249800	11	12	16	161	133	173	0.88	0.9	1.14	12.03	10.83	14.27	0.973333333333333	12.3766666666667	3.66854504097473	1.38612200269317e-32	4.58211211862033e-30	--	XP_020201576.1 uncharacterized protein LOC109787434 [Aegilops tauschii subsp. tauschii] [Aegilops tauschii]
TraesCS4D02G285800	7	11	20	190	160	139	0.47	0.7	1.2	11.92	10.97	9.65	0.79	10.8466666666667	3.77925528677427	1.46155290639568e-32	4.81785476654185e-30	--	XP_020163875.1 uncharacterized protein LOC109749323 [Aegilops tauschii subsp. tauschii] [Aegilops tauschii]
TraesCS2D02G099800	16	22	26	189	198	151	0.59	0.76	0.85	6.5	7.41	5.73	0.733333333333333	6.54666666666667	3.15821950079003	1.66647280773559e-32	5.47792081198972e-30	BDG4	XP_020161184.1 probable lysophospholipase BODYGUARD 4 [Aegilops tauschii subsp. tauschii] [Aegilops tauschii]
TraesCS7B02G453400	10	9	9	145	179	134	0.18	0.16	0.15	2.51	3.38	2.56	0.163333333333333	2.81666666666667	4.10809768705434	2.32617231560852e-32	7.62502343745491e-30	RGA5	VAI93625.1 unnamed protein product [Triticum turgidum subsp. durum] [Triticum turgidum]
TraesCS2B02G603200	76	53	80	325	319	263	3.15	2.07	2.97	12.65	13.54	11.32	2.73	12.5033333333333	2.19533990602046	4.08652643083881e-32	1.33207101946969e-29	NHL10	VAH54660.1 unnamed protein product [Triticum turgidum subsp. durum] [Triticum turgidum]
TraesCS3A02G139000	53	46	53	254	227	225	1.89	1.55	1.69	8.51	8.28	8.32	1.71	8.37	2.29123129766445	5.95982250016278e-32	1.93730652392791e-29	BZR2	CDM82126.1 unnamed protein product [Triticum aestivum]
TraesCS1A02G116900	96	88	131	373	403	339	6.14	5.32	7.5	22.42	26.4	22.49	6.32	23.77	1.91114543976533	6.33460587617006e-32	2.05343005219161e-29	--	XP_020186167.1 uncharacterized protein LOC109771888 [Aegilops tauschii subsp. tauschii] [Aegilops tauschii]
TraesCS2D02G347700	62	66	65	268	271	249	2.31	2.32	2.15	9.36	10.31	9.6	2.26	9.75666666666667	2.11006556727241	7.90613016824348e-32	2.55577669764693e-29	METTL18	XP_020151754.1 histidine protein methyltransferase 1 homolog [Aegilops tauschii subsp. tauschii] [Aegilops tauschii]
TraesCS7A02G299400	102	109	152	444	355	384	2.44	2.48	3.07	9.86	8.61	9.52	2.66333333333333	9.33	1.80864407864494	8.75857554161065e-32	2.82354277418832e-29	LHY	VAI75815.1 unnamed protein product [Triticum turgidum subsp. durum] [Triticum turgidum]
TraesCS5A02G396900	26	32	27	188	200	172	0.77	0.9	0.72	5.25	6.09	5.3	0.796666666666667	5.54666666666667	2.79957291016034	1.27978420697882e-31	4.11436558980975e-29	--	XP_020194101.1 uncharacterized protein LOC109779905 [Aegilops tauschii subsp. tauschii] [Aegilops tauschii]
TraesCS6B02G757100LC	120	145	150	406	390	398	8.16	9.35	9.16	26.02	27.26	28.18	8.89	27.1533333333333	1.61087398945249	1.34926285627561e-31	4.32584761553657e-29	DESI1	VAI62880.1 unnamed protein product [Triticum turgidum subsp. durum] [Triticum turgidum]
TraesCS4B02G186500	129	157	182	482	597	438	2.85	3.26	3.59	10	13.49	10.01	3.23333333333333	11.1666666666667	1.78810444315801	1.39019045596426e-31	4.44488709119807e-29	--	VAI06516.1 unnamed protein product [Triticum turgidum subsp. durum] [Triticum turgidum]
TraesCS3D02G091700	116	157	142	564	398	404	4.94	6.32	5.42	22.57	17.36	17.85	5.56	19.26	1.79245091511995	2.08795640038312e-31	6.65767939742869e-29	LBD40	XP_020171256.1 LOB domain-containing protein 40-like [Aegilops tauschii subsp. tauschii] [Aegilops tauschii]
TraesCS3B02G130300	3	4	10	148	142	146	0.22	0.28	0.67	10.36	10.83	11.28	0.39	10.8233333333333	4.79452694970268	2.68663871932873e-31	8.5433651144915e-29	HSP18	CDM81639.1 unnamed protein product [Triticum aestivum]
TraesCS1D02G187500	115	112	117	490	428	319	4.31	3.96	3.92	17.26	16.41	12.39	4.06333333333333	15.3533333333333	1.91781628517263	2.79085541356366e-31	8.85071767496061e-29	RBL1	XP_020176374.1 RHOMBOID-like protein 2 [Aegilops tauschii subsp. tauschii] [Aegilops tauschii]
TraesCS2D02G211000	5	3	7	189	211	111	0.25	0.14	0.32	9.01	10.97	5.84	0.236666666666667	8.60666666666667	5.18452616580251	3.06832151893793e-31	9.70435461592308e-29	At1g61340	XP_020146640.1 F-box protein SKIP27-like [Aegilops tauschii subsp. tauschii] [Aegilops tauschii]
TraesCS1A02G239100	476	514	554	1073	1089	947	6.06	6.18	6.31	12.84	14.2	12.51	6.18333333333333	13.1833333333333	1.09225850785199	4.60841108034265e-31	1.45359968044166e-28	PICBP	VAH06896.1 unnamed protein product [Triticum turgidum subsp. durum] [Triticum turgidum]
TraesCS3D02G354100	84	66	108	369	350	290	1.59	1.18	1.82	6.54	6.77	5.67	1.53	6.32666666666667	2.0479139336073	5.05806083011053e-31	1.59114084532579e-28	SCL14	XP_020188125.1 scarecrow-like protein 9 [Aegilops tauschii subsp. tauschii] [Aegilops tauschii]
TraesCS6D02G224700	113	104	86	380	343	334	2.88	2.5	1.95	9.07	8.93	8.81	2.44333333333333	8.93666666666667	1.87088611584875	8.66202687968539e-31	2.71755418100414e-28	At4g16820	XP_020156539.1 phospholipase A1-Ibeta2, chloroplastic-like [Aegilops tauschii subsp. tauschii] [Aegilops tauschii]
TraesCS1A02G082500	44	41	47	239	275	192	2.8	2.47	2.68	14.3	17.94	12.68	2.65	14.9733333333333	2.49833116222888	8.87723711383967e-31	2.77762577950734e-28	LTI6B	XP_003568974.1 hydrophobic protein LTI6B [Brachypodium distachyon]
TraesCS2D02G160200	9	3	13	182	170	115	0.25	0.08	0.33	4.79	4.86	3.34	0.22	4.33	4.29879159608943	9.39884131409353e-31	2.93298988868761e-28	IQM2	XP_020170561.1 IQ domain-containing protein IQM2-like [Aegilops tauschii subsp. tauschii] [Aegilops tauschii]
TraesCS5A02G488500	28	25	34	294	234	148	0.94	0.79	1.02	9.24	8.03	5.16	0.916666666666667	7.47666666666667	3.02792609667425	1.2824060611892e-30	3.99121601309794e-28	At5g13200	VAI39300.1 unnamed protein product [Triticum turgidum subsp. durum] [Triticum turgidum]
TraesCS6D02G166600	235	259	269	701	685	540	6.11	6.37	6.27	17.12	18.24	14.57	6.25	16.6433333333333	1.41301631105948	1.80056360582073e-30	5.58900674483697e-28	KCS11	XP_020166430.1 3-ketoacyl-CoA synthase 11-like [Aegilops tauschii subsp. tauschii] [Aegilops tauschii]
TraesCS6D02G207100	1262	1363	1328	593	544	538	30.52	31.1	28.74	13.44	13.45	13.47	30.12	13.4533333333333	-1.16276	2.01453598200875e-30	6.22620246319594e-28	PRR1	XP_020172665.1 two-component response regulator-like PRR1 [Aegilops tauschii subsp. tauschii] [Aegilops tauschii]
TraesCS3D02G107900	18	11	17	182	128	157	0.34	0.19	0.29	3.26	2.5	3.1	0.273333333333333	2.95333333333333	3.43361088393694	2.01648470676562e-30	6.22620246319594e-28	--	XP_020171720.1 uncharacterized protein LOC109757310 [Aegilops tauschii subsp. tauschii] [Aegilops tauschii]
TraesCS5A02G514800	13	18	23	185	153	140	0.42	0.54	0.66	5.56	5.01	4.64	0.54	5.07	3.23095443483987	2.17387694987377e-30	6.69451127442443e-28	--	VAI25107.1 unnamed protein product [Triticum turgidum subsp. durum] [Triticum turgidum]
TraesCS1A02G029300	35	55	57	304	297	196	0.7	1.06	1.04	5.79	6.17	4.12	0.933333333333333	5.36	2.52176867423396	2.31983827248644e-30	7.12525234443329e-28	At3g21620	VAH00613.1 unnamed protein product [Triticum turgidum subsp. durum] [Triticum turgidum]
TraesCS4D02G050200	606	639	700	1335	1344	1129	8.97	8.92	9.26	18.54	20.34	17.3	9.05	18.7266666666667	1.04910442643468	3.88805023181298e-30	1.19106652939062e-27	TMK1	XP_020162678.1 receptor protein kinase TMK1-like [Aegilops tauschii subsp. tauschii] [Aegilops tauschii]
TraesCS4D02G316500	232	305	275	735	724	585	6.82	8.46	7.24	20.29	21.78	17.83	7.50666666666667	19.9666666666667	1.41134917559592	5.65036615450119e-30	1.72641553037086e-27	CIPK9	XP_020186442.1 CBL-interacting protein kinase 9 [Aegilops tauschii subsp. tauschii] [Aegilops tauschii]
TraesCS3A02G139300	86	78	123	424	433	295	2.79	2.39	3.57	12.91	14.37	9.91	2.91666666666667	12.3966666666667	2.0875598258923	5.67572524678889e-30	1.72964770788992e-27	BBX22	VAH58746.1 unnamed protein product [Triticum turgidum subsp. durum] [Triticum turgidum]
TraesCS5D02G144800	98	109	127	375	389	314	2.36	2.47	2.73	8.46	9.56	7.81	2.52	8.61	1.77258950389693	6.25335931976459e-30	1.90072886835712e-27	CIPK15	AJR22377.1 CBL-interacting protein kinase 15 [Triticum aestivum]
TraesCS7D02G182700	46	46	40	297	226	188	1.23	1.16	0.95	7.44	6.16	5.2	1.11333333333333	6.26666666666667	2.49281265409095	6.35375882822275e-30	1.92624239791783e-27	ERF060	XP_020148534.1 ethylene-responsive transcription factor RAP2-13-like [Aegilops tauschii subsp. tauschii] [Aegilops tauschii]
TraesCS4B02G205100	874	704	923	1849	2196	1709	21.46	16.28	20.26	42.46	55.15	43.4	19.3333333333333	47.0033333333333	1.28167267244029	6.46882960302406e-30	1.95606040776507e-27	RHM1	VAI06795.1 unnamed protein product [Triticum turgidum subsp. durum] [Triticum turgidum]
TraesCS1D02G237100	27	39	44	187	243	204	0.66	0.9	0.96	4.28	6.07	5.16	0.84	5.17	2.62170304753617	6.70689813382791e-30	2.02282122014642e-27	ERF1-2	XP_020152304.1 eukaryotic peptide chain release factor subunit 1-2-like [Aegilops tauschii subsp. tauschii] [Aegilops tauschii]
TraesCS6A02G393500	6	13	10	166	153	113	0.23	0.46	0.34	5.89	5.91	4.42	0.343333333333333	5.40666666666667	3.97705757703406	7.5693296209826e-30	2.27706450104531e-27	--	VAI51550.1 unnamed protein product [Triticum turgidum subsp. durum] [Triticum turgidum]
TraesCS1D02G376600	2	6	11	164	122	134	0.09	0.27	0.46	7.21	5.85	6.48	0.273333333333333	6.51333333333333	4.5746627473503	7.91035576688679e-30	2.37355295526314e-27	ERF109	XP_020149094.1 ethylene-responsive transcription factor ERF109-like [Aegilops tauschii subsp. tauschii] [Aegilops tauschii]
TraesCS5B02G405500	16	14	26	172	163	142	1.07	0.88	1.55	10.77	11.12	9.81	1.16666666666667	10.5666666666667	3.17905601319444	8.17915218578198e-30	2.44793029944905e-27	--	VAI37096.1 unnamed protein product [Triticum turgidum subsp. durum] [Triticum turgidum]
TraesCS7A02G533000	249	206	262	653	608	544	7.44	5.81	7	18.32	18.59	16.85	6.75	17.92	1.40861123011941	8.67348074080035e-30	2.5892552633927e-27	ERD7	VAI81344.1 unnamed protein product [Triticum turgidum subsp. durum] [Triticum turgidum]
TraesCS2D02G540300	24	11	18	163	162	152	1.53	0.66	1.03	9.75	10.59	10.04	1.07333333333333	10.1266666666667	3.23798927638748	9.57672382744736e-30	2.85162182121004e-27	HIPP39	VAH53805.1 unnamed protein product [Triticum turgidum subsp. durum] [Triticum turgidum]
TraesCS3B02G407700	11	12	10	152	126	132	0.52	0.54	0.43	6.81	6.14	6.52	0.496666666666667	6.49	3.70786864825813	1.00916936724063e-29	2.99733547444753e-27	DIVARICATA	VAH82116.1 unnamed protein product [Triticum turgidum subsp. durum] [Triticum turgidum]
TraesCS2D02G171500	145	118	133	504	436	353	6.76	5.23	5.58	22.14	20.87	17.13	5.85666666666667	20.0466666666667	1.77521067656563	1.66340562348013e-29	4.92797602204789e-27	GEM	XP_020175541.1 GEM-like protein 1 [Aegilops tauschii subsp. tauschii] [Aegilops tauschii]
TraesCS2A02G277900	323	282	368	851	839	672	12.49	10.3	12.74	30.96	33.26	26.97	11.8433333333333	30.3966666666667	1.35983793680183	2.12782545231167e-29	6.28793914344486e-27	CEQORH	VAH47093.1 unnamed protein product [Triticum turgidum subsp. durum] [Triticum turgidum]
TraesCS2D02G172800	35	36	53	251	218	182	0.97	0.95	1.33	6.56	6.21	5.25	1.08333333333333	6.00666666666667	2.47108738789773	2.14373443888547e-29	6.31899474829359e-27	FLA9	SPT16939.1 unnamed protein product [Triticum aestivum]
TraesCS4D02G350300	93	83	112	353	334	288	5.36	4.5	5.77	19.06	19.63	17.14	5.21	18.61	1.83672277778064	2.40947152401929e-29	7.084451675472e-27	RBL1	XP_020193597.1 RHOMBOID-like protein 2 [Aegilops tauschii subsp. tauschii] [Aegilops tauschii]
TraesCS3D02G115300	21	19	26	159	173	152	1.67	1.43	1.85	11.88	14.09	12.54	1.65	12.8366666666667	2.95973269283002	2.41918801313505e-29	7.09519347551603e-27	HSP18	XP_020189893.1 17.5 kDa class II heat shock protein-like [Aegilops tauschii subsp. tauschii] [Aegilops tauschii]
TraesCS5B02G379300	19	13	28	165	205	147	0.66	0.42	0.87	5.37	7.26	5.27	0.65	5.96666666666667	3.19841355840201	2.57637491919293e-29	7.53731364484487e-27	PLP3	VAI36322.1 unnamed protein product [Triticum turgidum subsp. durum] [Triticum turgidum]
TraesCS5D02G352700LC	18	12	35	231	185	151	0.62	0.39	1.07	7.47	6.51	5.4	0.693333333333333	6.46	3.21991313727399	2.66779534298826e-29	7.78530540217387e-27	--	XP_020177238.1 uncharacterized protein LOC109762777 [Aegilops tauschii subsp. tauschii] [Aegilops tauschii]
TraesCS6D02G158400	7	10	18	128	142	161	0.16	0.22	0.38	2.8	3.37	3.87	0.253333333333333	3.34666666666667	3.72361604050719	2.8775619031536e-29	8.37656838385176e-27	LYK5	XP_020164009.1 protein LYK5-like [Aegilops tauschii subsp. tauschii] [Aegilops tauschii]
TraesCS5A02G429600	268	247	361	705	945	784	6.18	5.37	7.45	15.24	22.27	18.72	6.33333333333333	18.7433333333333	1.56534062832249	2.93206749230559e-29	8.5140546422974e-27	At1g64760	VAI23068.1 unnamed protein product [Triticum turgidum subsp. durum] [Triticum turgidum]
TraesCS4B02G228000	3	1	9	150	172	123	0.12	0.04	0.33	5.72	7.15	5.18	0.163333333333333	6.01666666666667	5.20307327765933	3.35889739047577e-29	9.72932897099643e-27	ERD7	XP_020154857.1 protein EARLY-RESPONSIVE TO DEHYDRATION 7, chloroplastic-like [Aegilops tauschii subsp. tauschii] [Aegilops tauschii]
TraesCS5D02G411800	53	59	70	247	222	267	1.35	1.42	1.59	5.91	5.79	7.05	1.45333333333333	6.25	2.10449055549368	3.47722970664086e-29	1.00472191291488e-26	HHO6	XP_020199780.1 uncharacterized protein LOC109785601 [Aegilops tauschii subsp. tauschii] [Aegilops tauschii]
TraesCS3A02G112900	3	0	6	151	152	200	0.21	0	0.37	9.69	10.63	14.17	0.193333333333333	11.4966666666667	5.89398141833329	3.56205333525349e-29	1.02669607240895e-26	HSP18	CDM81632.1 unnamed protein product [Triticum aestivum]
TraesCS2D02G139500	234	192	235	651	555	510	5.85	4.54	5.25	15.25	14.19	13.21	5.21333333333333	14.2166666666667	1.4473052288983	3.63046785334312e-29	1.04384424848629e-26	--	XP_020181903.1 protein SSUH2 homolog [Aegilops tauschii subsp. tauschii] [Aegilops tauschii]
TraesCS6A02G442500LC	72	62	85	373	260	259	2.59	2.1	2.71	12.51	9.5	9.61	2.46666666666667	10.54	2.09524019184206	4.20670142311228e-29	1.20656032827315e-26	--	XP_020189000.1 F-box/LRR-repeat protein At1g06630-like [Aegilops tauschii subsp. tauschii] [Aegilops tauschii]
TraesCS7D02G504900	192	234	223	29	28	34	2.62	3.01	2.71	0.37	0.39	0.48	2.78	0.413333333333333	-2.74971	4.9681202247672e-29	1.42146543995772e-26	--	XP_020151718.1 methyl-CpG-binding domain-containing protein 13-like isoform X1 [Aegilops tauschii subsp. tauschii] [Aegilops tauschii]
TraesCS5A02G417800	57	41	24	842	820	636	1.89	1.28	0.71	26.22	27.84	21.86	1.29333333333333	25.3066666666667	4.29035143483399	5.40342728925308e-29	1.54224358108042e-26	WZCI	VAI22719.1 unnamed protein product [Triticum turgidum subsp. durum] [Triticum turgidum]
TraesCS3B02G156900	41	49	59	254	247	193	1.36	1.53	1.75	7.9	8.38	6.62	1.54666666666667	7.63333333333333	2.30315088785673	5.56014721978792e-29	1.58311325536258e-26	BBX22	CDM82129.1 unnamed protein product [Triticum aestivum]
TraesCS5A02G210100	1983	2080	2488	625	838	847	68.97	68.28	77.44	20.41	29.82	30.53	71.5633333333333	26.92	-1.41054	6.63038499161084e-29	1.88325464196185e-26	Os09g0442300	BAF02548.1 triticain gamma [Triticum aestivum]
TraesCS7D02G303500	248	254	320	670	652	578	6.24	6.01	7.19	15.81	16.77	15.05	6.48	15.8766666666667	1.29284232975824	6.73780196005922e-29	1.90913089823257e-26	NDB2	XP_020148500.1 external alternative NAD(P)H-ubiquinone oxidoreductase B2, mitochondrial-like [Aegilops tauschii subsp. tauschii] [Aegilops tauschii]
TraesCS5D02G408500	146	119	131	459	468	352	5.12	3.94	4.1	15.08	16.76	12.75	4.38666666666667	14.8633333333333	1.76056071057866	7.11230941869465e-29	2.01037843670166e-26	BIPP2C2	XP_020158158.1 probable protein phosphatase 2C 34 [Aegilops tauschii subsp. tauschii] [Aegilops tauschii]
TraesCS3A02G256300	3	12	15	168	142	119	0.1	0.38	0.45	5.28	4.87	4.13	0.31	4.76	3.94062145292107	7.42682643259588e-29	2.09422188625358e-26	MAPKKK17	CDM80579.1 unnamed protein product [Triticum aestivum]
TraesCSU02G003600	7	4	2	174	144	114	0.11	0.06	0.03	2.58	2.33	1.87	0.0666666666666667	2.26	5.08321336824898	7.911915933345e-29	2.22564477488437e-26	ACA7	VAH21110.1 unnamed protein product [Triticum turgidum subsp. durum] [Triticum turgidum]
TraesCS3A02G277500	236	221	316	657	597	599	8.19	7.23	9.81	21.38	21.19	21.52	8.41	21.3633333333333	1.3449590635427	1.01463868174644e-28	2.8473632569624e-26	DSP8	VAH63580.1 unnamed protein product [Triticum turgidum subsp. durum] [Triticum turgidum]
TraesCS6A02G248400	53	56	29	335	286	204	1.75	1.75	0.86	10.42	9.7	7	1.45333333333333	9.04	2.63695713835942	1.21711014187689e-28	3.40738428284012e-26	TPP1	VAI47810.1 unnamed protein product [Triticum turgidum subsp. durum] [Triticum turgidum]
TraesCS1D02G034600	39	22	21	230	198	161	1.17	0.63	0.57	6.53	6.11	5.04	0.79	5.89333333333333	2.89915931049317	1.34809572819818e-28	3.76508015048228e-26	MUCI21	XP_020191488.1 EGF domain-specific O-linked N-acetylglucosamine transferase-like [Aegilops tauschii subsp. tauschii] [Aegilops tauschii]
TraesCS5A02G380900	4	2	5	200	136	120	0.05	0.02	0.06	2.43	1.79	1.6	0.0433333333333333	1.94	5.48443562476719	1.53486578462939e-28	4.27650152021192e-26	BHLH148	VAI21720.1 unnamed protein product [Triticum turgidum subsp. durum] [Triticum turgidum]
TraesCS1D02G187100	11	5	17	181	136	119	0.41	0.18	0.57	6.42	5.25	4.66	0.386666666666667	5.44333333333333	3.81532808043412	1.89278320384626e-28	5.2612179591567e-26	--	XP_020176368.1 uncharacterized protein LOC109761971 [Aegilops tauschii subsp. tauschii] [Aegilops tauschii]
TraesCS7A02G174700	2	8	12	135	142	120	0.08	0.3	0.43	5.09	5.83	4.99	0.27	5.30333333333333	4.29586811744642	2.04506080918237e-28	5.67102146948197e-26	OPR1	VAI72029.1 unnamed protein product [Triticum turgidum subsp. durum] [Triticum turgidum]
TraesCS4D02G228900	16	22	13	153	174	132	0.36	0.47	0.26	3.27	4.05	3.11	0.363333333333333	3.47666666666667	3.25833911774284	2.19041921851677e-28	6.0597455742144e-26	ERD7	XP_020154857.1 protein EARLY-RESPONSIVE TO DEHYDRATION 7, chloroplastic-like [Aegilops tauschii subsp. tauschii] [Aegilops tauschii]
TraesCS5A02G314700	136	134	113	389	386	367	4.84	4.53	3.61	13.07	14.13	13.61	4.32666666666667	13.6033333333333	1.65263232725896	2.5470277373862e-28	7.02967641236812e-26	HSFB2C	VAI20098.1 unnamed protein product [Triticum turgidum subsp. durum] [Triticum turgidum]
TraesCS5D02G311300	6	9	1	169	132	113	0.1	0.14	0.01	2.6	2.21	1.92	0.0833333333333333	2.24333333333333	4.75060650483559	2.6247061150295e-28	7.22702021159957e-26	PIK-2	XP_020199144.1 disease resistance protein RPM1-like [Aegilops tauschii subsp. tauschii] [Aegilops tauschii]
TraesCS3D02G114800	5	6	7	107	175	134	0.36	0.4	0.45	7.16	12.76	9.89	0.403333333333333	9.93666666666667	4.62271742271658	2.80033456250609e-28	7.69250589609362e-26	HSP18	XP_020186796.1 17.5 kDa class II heat shock protein-like [Aegilops tauschii subsp. tauschii] [Aegilops tauschii]
TraesCS5A02G322300	22	23	35	163	200	162	1.04	1.01	1.45	7.08	9.45	7.78	1.16666666666667	8.10333333333333	2.7961230661964	4.17003432192476e-28	1.14282378552759e-25	PBL19	VAI20334.1 unnamed protein product [Triticum turgidum subsp. durum] [Triticum turgidum]
TraesCS2B02G224300	0	2	8	149	145	145	0	0.04	0.16	3.04	3.21	3.26	0.0666666666666667	3.17	5.5713734359732	4.82056450535923e-28	1.31801892417324e-25	PAL	VAH44557.1 unnamed protein product [Triticum turgidum subsp. durum] [Triticum turgidum]
TraesCS3D02G315700	84	86	92	359	285	261	2.46	2.38	2.36	9.84	8.46	7.87	2.4	8.72333333333333	1.86184511271836	6.5127406644185e-28	1.76829219960924e-25	DGK5	XP_020164355.1 diacylglycerol kinase 5-like [Aegilops tauschii subsp. tauschii] [Aegilops tauschii]
TraesCS6D02G240300	2	11	5	155	131	111	0.12	0.6	0.26	8.42	7.75	6.65	0.326666666666667	7.60666666666667	4.54137323217347	6.71508197287826e-28	1.81901000608833e-25	--	XP_020155380.1 E3 ubiquitin-protein ligase RHA2A-like [Aegilops tauschii subsp. tauschii] [Aegilops tauschii]
TraesCS1B02G157000	195	180	215	469	473	526	7.45	6.49	7.35	16.83	18.48	20.84	7.09666666666667	18.7166666666667	1.39911007283567	8.05724294297682e-28	2.17252231261068e-25	HIPP06	AGS38338.1 putative stripe rust resistance protein [Triticum aestivum]
TraesCS6D02G346400	6	6	12	130	109	143	0.11	0.11	0.2	2.29	2.09	2.78	0.14	2.38666666666667	4.0914983544855	8.6606096359092e-28	2.32984335819165e-25	--	ABC49855.1 cadmium tolerance factor [Triticum aestivum]
TraesCS3D02G381800	33	42	49	224	172	205	1.35	1.62	1.81	8.61	7.2	8.7	1.59333333333333	8.17	2.35828796088609	1.07487233241568e-27	2.88494747898962e-25	LIGB	XP_020158902.1 extradiol ring-cleavage dioxygenase-like [Aegilops tauschii subsp. tauschii] [Aegilops tauschii]
TraesCS5B02G271800	105	116	113	428	323	307	2.57	2.68	2.48	9.86	8.1	7.8	2.57666666666667	8.58666666666667	1.73659227418977	1.28431759842162e-27	3.43920855840949e-25	NAC017	VAI33944.1 unnamed protein product [Triticum turgidum subsp. durum] [Triticum turgidum]
TraesCS2A02G583400	86	50	71	304	267	273	3.86	2.12	2.85	12.79	12.26	12.7	2.94333333333333	12.5833333333333	2.09599130145134	1.34802166818154e-27	3.60155688707626e-25	NHL10	VAH39151.1 unnamed protein product [Triticum turgidum subsp. durum] [Triticum turgidum]
TraesCS4A02G453405	874	834	772	325	235	255	92.12	82.94	72.85	32.21	25.36	27.81	82.6366666666667	28.46	-1.53785	1.51174935749623e-27	4.02979346954269e-25	AVNLA	AZR39389.1 ALP [Triticum dicoccoides]
TraesCS7D02G032000	2763	2565	2529	1230	1116	1004	313.59	274.71	256.86	131.11	129.62	118.15	281.72	126.293333333333	-1.15748	1.6622124840946e-27	4.42080521167541e-25	AVNLA	Q2A784.1 RecName: Full=Avenin-like a1; AltName: Full=LMW-gliadin 2482; Short=LMGli2482; Short=TaAvlike-a1; Flags: Precursor [Triticum aestivum]
TraesCS1B02G141700	184	171	209	452	462	486	4.53	4.01	4.6	10.56	11.76	12.41	4.38	11.5766666666667	1.40221713505977	1.81303377371201e-27	4.81099406501874e-25	ME6	XP_020170073.1 NADP-dependent malic enzyme, chloroplastic-like isoform X2 [Aegilops tauschii subsp. tauschii] [Aegilops tauschii]
TraesCS6A02G094300	57	80	85	245	288	336	3.28	4.34	4.38	13.24	16.94	20.04	4	16.74	2.06522762277562	2.16032928085165e-27	5.71959396162493e-25	WHAB1.6	VAI43101.1 unnamed protein product [Triticum turgidum subsp. durum] [Triticum turgidum]
TraesCS1B02G088900	2	3	2	151	176	181	0.07	0.09	0.06	4.67	5.93	6.18	0.0733333333333333	5.59333333333333	6.25309538180253	2.60007428280145e-27	6.85283542166646e-25	WRKY24	ACD80359.1 WRKY14 transcription factor [Triticum aestivum]
TraesCS6D02G334000	255	214	247	641	623	516	4.9	3.88	4.24	11.55	12.24	10.27	4.34	11.3533333333333	1.3873489865129	2.71682045003338e-27	7.14444410570352e-25	TPS11	XP_020195026.1 probable alpha,alpha-trehalose-phosphate synthase [UDP-forming] 11 [Aegilops tauschii subsp. tauschii] [Aegilops tauschii]
TraesCS3D02G046700	246	186	244	621	602	520	17.83	12.72	15.82	42.26	44.66	39.09	15.4566666666667	42.0033333333333	1.44227459696314	2.84589793564978e-27	7.4671001844307e-25	hsp16.9B	XP_020201211.1 16.9 kDa class I heat shock protein 1-like [Aegilops tauschii subsp. tauschii] [Aegilops tauschii]
TraesCS5D02G270400	30	17	37	194	252	156	1.77	0.94	1.95	10.73	15.19	9.52	1.55333333333333	11.8133333333333	2.92697674390074	3.05281636648711e-27	7.99209567872605e-25	--	XP_020171700.1 adenomatous polyposis coli protein 2-like [Aegilops tauschii subsp. tauschii] [Aegilops tauschii]
TraesCS4B02G391800	431	504	444	102	131	132	18.33	20.26	16.91	4.05	5.72	5.8	18.5	5.19	-1.83372	3.36235531092322e-27	8.78280230345664e-25	--	VAI11692.1 unnamed protein product [Triticum turgidum subsp. durum] [Triticum turgidum]
TraesCS3D02G361800	7	10	22	164	160	115	0.2	0.28	0.59	4.6	4.89	3.57	0.356666666666667	4.35333333333333	3.60947219514528	3.58720969735339e-27	9.34927512703091e-25	HSPRO1	XP_020152570.1 nematode resistance protein-like HSPRO1 [Aegilops tauschii subsp. tauschii] [Aegilops tauschii]
TraesCS4B02G059500	35	34	36	179	223	169	0.82	0.76	0.76	3.96	5.39	4.13	0.78	4.49333333333333	2.52624006159845	3.83804749853755e-27	9.98079987497469e-25	EGY3	VAI02012.1 unnamed protein product [Triticum turgidum subsp. durum] [Triticum turgidum]
TraesCS4B02G258000	125	111	175	388	437	410	2.06	1.75	2.58	6.03	7.38	7.02	2.13	6.81	1.67680136778623	4.32935809719059e-27	1.12334843292558e-24	ACA10	VAI08641.1 unnamed protein product [Triticum turgidum subsp. durum] [Triticum turgidum]
TraesCS1D02G239000	65	59	57	273	293	205	3.76	3.23	2.97	14.85	17.35	12.29	3.32	14.83	2.15926345110771	6.45010650326425e-27	1.66992115757741e-24	CML15	XP_020167597.1 probable calcium-binding protein CML15 [Aegilops tauschii subsp. tauschii] [Aegilops tauschii]
TraesCS1B02G310100	41	35	32	233	209	156	0.98	0.79	0.69	5.24	5.1	3.88	0.82	4.74	2.53119124428018	6.64876135031595e-27	1.71755265063283e-24	PUB16	XP_020198858.1 U-box domain-containing protein 16-like [Aegilops tauschii subsp. tauschii] [Aegilops tauschii]
TraesCS5A02G405700	156	129	114	487	526	362	2.88	2.25	1.88	8.44	9.94	6.93	2.33666666666667	8.43666666666667	1.85222115810006	7.05459193707067e-27	1.81837545740063e-24	CSLC10	VAI22409.1 unnamed protein product [Triticum turgidum subsp. durum] [Triticum turgidum]
TraesCS5A02G262800	22	20	40	187	170	158	1	0.86	1.63	7.99	7.92	7.46	1.16333333333333	7.79	2.74335879257318	7.25387159995326e-27	1.8656320052082e-24	--	XP_020171700.1 adenomatous polyposis coli protein 2-like [Aegilops tauschii subsp. tauschii] [Aegilops tauschii]
TraesCS7A02G195800	13	6	17	145	134	118	0.54	0.23	0.63	5.62	5.67	5.05	0.466666666666667	5.44666666666667	3.54490925120072	8.7991257143024e-27	2.25809493276117e-24	2MMP	VAI72535.1 unnamed protein product [Triticum turgidum subsp. durum] [Triticum turgidum]
TraesCS6A02G536300LC	35	37	89	815	695	700	1.91	1.91	4.35	41.76	38.84	39.61	2.72333333333333	40.07	3.87907702700627	1.22159871153638e-26	3.12809462628906e-24	HSP18.6	VAI50287.1 unnamed protein product [Triticum turgidum subsp. durum] [Triticum turgidum]
TraesCS7D02G154200	377	392	397	1047	920	715	14.82	14.54	13.96	38.66	37.03	29.14	14.44	34.9433333333333	1.27494649493891	1.27087738311044e-26	3.24717495909061e-24	NAC079	QHI46112.1 NAC family transcription factor NAC-B1 [Triticum aestivum]
TraesCS6D02G354100	60	54	72	310	246	207	1.61	1.37	1.73	7.81	6.75	5.75	1.57	6.77	2.10839127468337	1.29558662438785e-26	3.30309668756241e-24	At5g35200	XP_020152744.1 putative clathrin assembly protein At5g35200 isoform X1 [Aegilops tauschii subsp. tauschii] [Aegilops tauschii]
TraesCS7A02G232500	169	189	217	484	414	513	11.62	12.24	13.33	31.22	29.07	36.52	12.3966666666667	32.27	1.38024133059611	1.7800354245752e-26	4.52833272727477e-24	HSP26.2	VAI73540.1 unnamed protein product [Triticum turgidum subsp. durum] [Triticum turgidum]
TraesCS4D02G243000	13	9	4	96	179	163	0.34	0.22	0.09	2.34	4.77	4.39	0.216666666666667	3.83333333333333	4.14505033280328	2.24079511388844e-26	5.68811986588835e-24	HSP70-8	XP_020147360.1 heat shock 70 kDa protein 8 [Aegilops tauschii subsp. tauschii] [Aegilops tauschii]
TraesCS2D02G191800	293	317	339	680	697	611	5.77	5.88	5.97	12.55	14.04	12.46	5.87333333333333	13.0166666666667	1.14810862410893	2.31143424767086e-26	5.85473286863504e-24	GH3.8	XP_020153870.1 probable indole-3-acetic acid-amido synthetase GH3.8 [Aegilops tauschii subsp. tauschii] [Aegilops tauschii]
TraesCS1D02G372700	8	9	9	153	131	94	0.3	0.32	0.31	5.46	5.11	3.71	0.31	4.76	3.94062145292107	2.35549011421436e-26	5.95343767053117e-24	MAPKKK17	XP_020158376.1 mitogen-activated protein kinase kinase kinase NPK1-like [Aegilops tauschii subsp. tauschii] [Aegilops tauschii]
TraesCS5D02G068000	7	5	14	140	131	103	0.46	0.31	0.82	8.64	8.79	7.01	0.53	8.14666666666667	3.94214561453437	2.73264323608981e-26	6.89179691322632e-24	CML5	EMS61663.1 Calmodulin-like protein 5 [Triticum urartu]
TraesCS3D02G287100	10	11	15	119	147	118	0.44	0.46	0.6	4.95	6.67	5.42	0.5	5.68	3.50589092972996	2.74466395723223e-26	6.9056018844076e-24	At1g17710	XP_020197724.1 inorganic pyrophosphatase 1-like [Aegilops tauschii subsp. tauschii] [Aegilops tauschii]
TraesCS4A02G098600	84	64	53	256	412	304	2.03	1.46	1.15	5.82	10.18	7.61	1.54666666666667	7.87	2.34720133110107	2.74991922726833e-26	6.9056018844076e-24	HSP70	VAH89392.1 unnamed protein product [Triticum turgidum subsp. durum] [Triticum turgidum]
TraesCS4D02G044800	12	22	28	153	168	137	0.66	1.15	1.38	7.96	9.53	7.87	1.06333333333333	8.45333333333333	2.99092641637454	2.85396737519752e-26	7.15154111735254e-24	--	XP_020193005.1 uncharacterized protein LOC109778831 [Aegilops tauschii subsp. tauschii] [Aegilops tauschii]
TraesCS1A02G361100	249	235	298	627	554	543	4.55	4.05	4.86	10.75	10.35	10.28	4.48666666666667	10.46	1.22116694235778	4.72783009539083e-26	1.18217977227099e-23	GINT1	VAH09928.1 unnamed protein product [Triticum turgidum subsp. durum] [Triticum turgidum]
TraesCS2B02G298200	18	7	19	166	148	115	0.86	0.32	0.81	7.45	7.24	5.69	0.663333333333333	6.79333333333333	3.35631371562217	5.01644511526802e-26	1.25167258055201e-23	Y-2	VAH47182.1 unnamed protein product [Triticum turgidum subsp. durum] [Triticum turgidum]
TraesCS3A02G354800	104	153	131	396	352	351	2.89	3.99	3.24	10.3	9.97	10.05	3.37333333333333	10.1066666666667	1.58306046347679	5.15053036338969e-26	1.2823943918821e-23	NPR4	VAH65727.1 unnamed protein product [Triticum turgidum subsp. durum] [Triticum turgidum]
TraesCS5D02G410800	8	16	18	191	145	104	0.6	1.13	1.2	13.37	11.06	8.03	0.976666666666667	10.82	3.46969043012572	5.23894650051587e-26	1.30163906026193e-23	--	XP_020165995.1 uncharacterized protein LOC109751516 [Aegilops tauschii subsp. tauschii] [Aegilops tauschii]
TraesCS4A02G226700	3	7	7	100	171	116	0.19	0.38	0.4	5.97	11.13	7.56	0.323333333333333	8.22	4.66804424221571	6.12640441919478e-26	1.5189069871674e-23	HSP21.9	VAH93803.1 unnamed protein product [Triticum turgidum subsp. durum] [Triticum turgidum]
TraesCS6D02G088800	26	58	47	193	233	241	1.39	2.91	2.25	9.69	12.74	13.36	2.18333333333333	11.93	2.44998973199157	6.22775040930293e-26	1.54076915094598e-23	WHAB1.6	XP_020158829.1 chlorophyll a-b binding protein of LHCII type 1-like [Aegilops tauschii subsp. tauschii] [Aegilops tauschii]
TraesCS4A02G011800LC	18	21	25	149	140	137	0.69	0.75	0.84	5.29	5.39	5.37	0.76	5.35	2.81546756784492	1.04978974522059e-25	2.58628411716219e-23	--	-
TraesCS2B02G271700	393	412	443	877	740	760	9.58	9.5	9.68	20.1	18.47	19.22	9.58666666666667	19.2633333333333	1.0067561941363	1.13676374731708e-25	2.79467158064159e-23	CIPK23	AOO86834.1 CBL-interacting protein kinase 23 [Triticum aestivum]
TraesCS7B02G061100	13	18	34	153	162	151	0.56	0.73	1.31	6.2	7.15	6.75	0.866666666666667	6.7	2.95061197303784	1.17824998236853e-25	2.89059055422914e-23	ATL60	VAI83753.1 unnamed protein product [Triticum turgidum subsp. durum] [Triticum turgidum]
TraesCS5B02G208100	1357	1199	1438	408	540	491	47.57	39.67	45.08	13.43	19.38	17.85	44.1066666666667	16.8866666666667	-1.38511	1.1996467667373e-25	2.93692602378937e-23	CCP2	VAI32424.1 unnamed protein product [Triticum turgidum subsp. durum] [Triticum turgidum]
TraesCS7B02G325400	275	266	315	690	674	551	4.73	4.31	4.84	11.13	11.85	9.81	4.62666666666667	10.93	1.2402483338148	1.27369720675904e-25	3.11170343485087e-23	EXO70A1	VAI91214.1 unnamed protein product [Triticum turgidum subsp. durum] [Triticum turgidum]
TraesCS2A02G462700	32	30	26	166	153	166	1.22	1.09	0.9	6.02	6.07	6.65	1.07	6.24666666666667	2.54547575053688	1.32312591971356e-25	3.22572586201501e-23	CRPK1	XP_020152866.1 putative serine/threonine-protein kinase isoform X1 [Aegilops tauschii subsp. tauschii] [Aegilops tauschii]
TraesCS6A02G121300	330	294	337	747	744	617	12.35	10.36	11.29	26.21	28.47	23.89	11.3333333333333	26.19	1.20844381404669	1.6255020026089e-25	3.94646255911409e-23	aifA	XP_020161911.1 apoptosis-inducing factor homolog B-like [Aegilops tauschii subsp. tauschii] [Aegilops tauschii]
TraesCS6A02G360900	522	483	616	1095	1056	948	17.07	14.89	18.01	33.6	35.32	32.11	16.6566666666667	33.6766666666667	1.01564962944063	2.02984417123134e-25	4.91793839763631e-23	--	VAI50777.1 unnamed protein product [Triticum turgidum subsp. durum] [Triticum turgidum]
TraesCS2B02G367700	73	72	82	291	280	221	2.96	2.74	2.98	11.09	11.61	9.27	2.89333333333333	10.6566666666667	1.88095179633605	2.25095526074022e-25	5.44238195294095e-23	METTL18	XP_020151754.1 histidine protein methyltransferase 1 homolog [Aegilops tauschii subsp. tauschii] [Aegilops tauschii]
TraesCS6B02G361400	48	46	57	238	208	181	2.06	1.83	2.19	9.52	9.06	8	2.02666666666667	8.86	2.12819787583259	2.27726118340576e-25	5.49463212792801e-23	ERF013	VAI61447.1 unnamed protein product [Triticum turgidum subsp. durum] [Triticum turgidum]
TraesCS4B02G186300	25	9	15	149	146	133	1.63	0.56	0.88	9.13	9.75	8.98	1.02333333333333	9.28666666666667	3.18188469723108	2.45807442880764e-25	5.91869929645941e-23	--	VAH90084.1 unnamed protein product [Triticum turgidum subsp. durum] [Triticum turgidum]
TraesCS4B02G305100	196	131	205	532	708	487	13.62	8.59	12.75	34.72	50.36	35.08	11.6533333333333	40.0533333333333	1.78117962801368	2.5250225312131e-25	6.06741656360616e-23	--	-
TraesCS4D02G229200	371	394	451	811	897	755	10.2	10.22	11.11	20.93	25.24	21.52	10.51	22.5633333333333	1.10221754685111	2.77891423604583e-25	6.66381356005236e-23	--	XP_020154860.1 triadin-like isoform X1 [Aegilops tauschii subsp. tauschii] [Aegilops tauschii]
TraesCS2A02G029900	4	5	3	119	143	100	0.06	0.07	0.04	1.75	2.29	1.62	0.0566666666666667	1.88666666666667	5.05719540158154	2.95795070958033e-25	7.07863615412084e-23	At1g59620	VAH24780.1 unnamed protein product [Triticum turgidum subsp. durum] [Triticum turgidum]
TraesCS3D02G368000	5	12	17	212	137	97	0.23	0.51	0.69	9.02	6.34	4.53	0.476666666666667	6.63	3.79795622405535	3.22169921361309e-25	7.69407521174349e-23	DIVARICATA	XP_020158558.1 transcription factor DIVARICATA-like [Aegilops tauschii subsp. tauschii] [Aegilops tauschii]
TraesCS1D02G434200	130	127	131	420	325	331	2.55	2.15	2.28	7.55	6.22	6.42	2.32666666666667	6.73	1.53234196912182	3.29837223132619e-25	7.8611428768687e-23	--	XP_020199624.1 uncharacterized protein LOC109785425 [Aegilops tauschii subsp. tauschii] [Aegilops tauschii]
TraesCS6D02G281200	132	125	154	407	341	340	3.84	3.44	4.01	11.13	10.16	10.26	3.76333333333333	10.5166666666667	1.48259451909692	5.08968967798306e-25	1.21058062092873e-22	RAP2-4	XP_020155853.1 ethylene-responsive transcription factor RAP2-4-like [Aegilops tauschii subsp. tauschii] [Aegilops tauschii]
TraesCS6B02G398200	2	5	17	114	135	128	0.04	0.09	0.29	2	2.6	2.49	0.14	2.36333333333333	4.07732439446075	5.93234857308925e-25	1.4052941188665e-22	--	VAI62333.1 unnamed protein product [Triticum turgidum subsp. durum] [Triticum turgidum]
TraesCS4D02G210900	53	54	73	307	199	223	1.88	1.81	2.31	10.21	7.22	8.19	2	8.54	2.09423606984577	6.9325040894195e-25	1.63889998697383e-22	PP2C30	XP_020164296.1 probable protein phosphatase 2C 30 [Aegilops tauschii subsp. tauschii] [Aegilops tauschii]
TraesCS2D02G025400	135	148	183	371	463	428	4.14	4.26	5.01	10.65	14.53	13.55	4.47	12.91	1.53014226412387	8.36383198351638e-25	1.97329102091745e-22	At5g18500	XP_020188054.1 putative receptor-like protein kinase At4g00960 [Aegilops tauschii subsp. tauschii] [Aegilops tauschii]
TraesCS7A02G257200	29	34	30	165	181	147	0.91	1	0.84	4.87	5.83	4.79	0.916666666666667	5.16333333333333	2.49383362037755	9.38595815202861e-25	2.20998711240783e-22	RIN4	VAI74298.1 unnamed protein product [Triticum turgidum subsp. durum] [Triticum turgidum]
TraesCS4A02G419400	275	287	297	640	583	549	5.7	5.6	5.5	12.43	12.34	11.79	5.6	12.1866666666667	1.12180483739195	1.02973107774005e-24	2.4197026140421e-22	ADC1	VAH98687.1 unnamed protein product [Triticum turgidum subsp. durum] [Triticum turgidum]
TraesCS2B02G293700	0	4	8	164	148	84	0	0.1	0.18	3.93	3.86	2.22	0.0933333333333333	3.33666666666667	5.15987133677839	1.03991721389477e-24	2.43874132674137e-22	EXO70B1	VAH47038.1 unnamed protein product [Triticum turgidum subsp. durum] [Triticum turgidum]
TraesCS3A02G364600	123	128	150	392	337	326	2.6	2.56	2.84	7.79	7.31	7.16	2.66666666666667	7.42	1.47638168756723	1.07841446588446e-24	2.52396435253461e-22	--	VAH66402.1 unnamed protein product [Triticum turgidum subsp. durum] [Triticum turgidum]
TraesCS6B02G253900	693	838	821	335	304	299	16.58	18.91	17.56	7.53	7.45	7.42	17.6833333333333	7.46666666666667	-1.24385	1.08837152129049e-24	2.54218387553804e-22	PRR1	AMK48976.1 timing of cab expression 1 [Triticum aestivum]
TraesCS2D02G190200	21	32	16	163	137	155	0.29	0.42	0.2	2.14	1.96	2.25	0.303333333333333	2.11666666666667	2.80281814146084	1.10023495602336e-24	2.56477480127024e-22	At1g74360	XP_020177380.1 probable LRR receptor-like serine/threonine-protein kinase At1g74360 [Aegilops tauschii subsp. tauschii] [Aegilops tauschii]
TraesCS4A02G089700	86	86	98	293	271	255	2.32	2.19	2.37	7.42	7.49	7.14	2.29333333333333	7.35	1.68029818574279	1.20578585224145e-24	2.80523801194828e-22	CRPK1	VAH89097.1 unnamed protein product [Triticum turgidum subsp. durum] [Triticum turgidum]
TraesCS5D02G434500	352	368	408	901	772	666	6.45	6.37	6.7	15.51	14.49	12.66	6.50666666666667	14.22	1.12793091277768	1.32925483284874e-24	3.08635037796875e-22	CPK10	XP_020152839.1 calcium-dependent protein kinase 10-like isoform X1 [Aegilops tauschii subsp. tauschii] [Aegilops tauschii]
TraesCS1A02G210800	71	62	93	276	242	246	1.64	1.35	1.91	5.96	5.71	5.86	1.63333333333333	5.84333333333333	1.83897234175697	1.35645108532388e-24	3.14325978033211e-22	ORP2A	VAH06136.1 unnamed protein product [Triticum turgidum subsp. durum] [Triticum turgidum]
TraesCS4D02G268000	26	19	29	148	188	136	0.86	0.6	0.86	4.62	6.4	4.69	0.773333333333333	5.23666666666667	2.75948647016663	1.69935294453009e-24	3.93007273270355e-22	HIPP05	XP_020169022.1 heavy metal-associated isoprenylated plant protein 6-like [Aegilops tauschii subsp. tauschii] [Aegilops tauschii]
TraesCS7D02G497400	4	0	3	157	114	151	0.17	0	0.11	6.09	4.82	6.47	0.0933333333333333	5.79333333333333	5.9558574447568	1.78958000804856e-24	4.13057656216684e-22	WRKY71	VAI80864.1 unnamed protein product [Triticum turgidum subsp. durum] [Triticum turgidum]
TraesCS3D02G046300	26	10	18	126	190	149	1.96	0.71	1.21	8.92	14.66	11.59	1.29333333333333	11.7233333333333	3.18021677743818	1.90419552989166e-24	4.38647183659413e-22	hsp16.9A	XP_020191865.1 16.9 kDa class I heat shock protein 1-like [Aegilops tauschii subsp. tauschii] [Aegilops tauschii]
TraesCS4A02G096700	213	204	224	469	482	485	4.14	3.76	3.91	8.58	9.6	9.8	3.93666666666667	9.32666666666667	1.2443869977676	2.05665145354671e-24	4.72835886830929e-22	TRP5	VAH89317.1 unnamed protein product [Triticum turgidum subsp. durum] [Triticum turgidum]
TraesCS2B02G124100	40	31	46	215	205	152	1.76	1.28	1.81	8.86	9.2	6.91	1.61666666666667	8.32333333333333	2.36413916885372	2.30232645562618e-24	5.27770813630469e-22	CIPK29	VAH42232.1 unnamed protein product [Triticum turgidum subsp. durum] [Triticum turgidum]
TraesCS6B02G122800	49	33	45	178	197	203	2.75	1.71	2.28	9.35	11.34	11.83	2.24666666666667	10.84	2.27050676089317	2.30461695890661e-24	5.27770813630469e-22	WHAB1.6	EMS50796.1 Chlorophyll a-b binding protein, chloroplastic [Triticum urartu]
TraesCS1D02G103500	5	4	20	510	554	438	0.11	0.08	0.38	10.26	12.16	9.73	0.19	10.7166666666667	5.81771300805057	2.73509664085422e-24	6.23911265313923e-22	PAL	XP_020174855.1 phenylalanine ammonia-lyase-like [Aegilops tauschii subsp. tauschii] [Aegilops tauschii]
TraesCS1B02G119700	4	4	4	127	107	98	0.18	0.14	0.15	4.94	4.53	4.22	0.156666666666667	4.56333333333333	4.86431787958026	3.16340465256958e-24	7.20209998546687e-22	CDKF-2	VAH14566.1 unnamed protein product [Triticum turgidum subsp. durum] [Triticum turgidum]
TraesCS3A02G289200	67	81	99	304	254	242	2.35	2.67	3.1	10	9.11	8.8	2.70666666666667	9.30333333333333	1.78123049188089	3.27531045435606e-24	7.44239572795445e-22	HSFA4B	ACN93796.2 HsfA4a [Triticum aestivum]
TraesCS4B02G228300	265	245	251	570	603	524	7.38	6.43	6.25	14.89	17.18	15.1	6.68666666666667	15.7233333333333	1.23354799491741	3.43816712799145e-24	7.79730995449255e-22	--	VAI07840.1 unnamed protein product [Triticum turgidum subsp. durum] [Triticum turgidum]
TraesCS3D02G276200	28	27	15	167	167	131	0.45	0.41	0.21	2.49	2.71	2.15	0.356666666666667	2.45	2.78013345332258	3.86709104764967e-24	8.75308952762204e-22	BAM1	XP_020189560.1 receptor-like protein kinase 5 [Aegilops tauschii subsp. tauschii] [Aegilops tauschii]
TraesCS3B02G131200	3	7	5	97	125	106	0.22	0.48	0.32	6.6	9.27	7.96	0.34	7.94333333333333	4.54613789421878	3.95137899522123e-24	8.9266075826019e-22	HSP18	CDM81632.1 unnamed protein product [Triticum aestivum]
TraesCS3A02G206400	11	8	10	120	104	106	0.28	0.19	0.22	2.83	2.68	2.76	0.23	2.75666666666667	3.58321906239311	4.54781168444417e-24	1.02542200180544e-21	IQM1	VAH61172.1 unnamed protein product [Triticum turgidum subsp. durum] [Triticum turgidum]
TraesCS2D02G399000	25	21	40	149	174	164	0.93	0.74	1.36	5.23	6.67	6.38	1.01	6.09333333333333	2.59287637158512	4.79103214305886e-24	1.07818492970199e-21	HSFB2A	XP_020152813.1 heat stress transcription factor B-2a-like [Aegilops tauschii subsp. tauschii] [Aegilops tauschii]
TraesCS4D02G206600	65	59	41	225	398	245	1.6	1.37	0.9	5.19	10.01	6.24	1.29	7.14666666666667	2.46989943431336	4.90207030679075e-24	1.10105579931145e-21	HSP70	XP_020151532.1 heat shock cognate 70 kDa protein-like [Aegilops tauschii subsp. tauschii] [Aegilops tauschii]
TraesCS4B02G248900	64	49	61	269	245	186	5.69	4.11	4.85	22.47	22.3	17.15	4.88333333333333	20.64	2.0795048068348	5.01245097713637e-24	1.12369164415029e-21	--	VAH88105.1 unnamed protein product [Triticum turgidum subsp. durum] [Triticum turgidum]
TraesCS5D02G269400	2	3	7	139	132	83	0.16	0.23	0.51	10.56	10.93	6.96	0.3	9.48333333333333	4.98235984086427	5.85816216394494e-24	1.31077218498884e-21	--	XP_020165506.1 uncharacterized protein LOC109751004 [Aegilops tauschii subsp. tauschii] [Aegilops tauschii]
TraesCS1B02G138900LC	46	32	50	195	186	180	2.02	1.33	1.96	8.03	8.36	8.19	1.77	8.19333333333333	2.21070114956851	6.61734948534492e-24	1.47781578525579e-21	Os05g0128200	VAH13694.1 unnamed protein product [Triticum turgidum subsp. durum] [Triticum turgidum]
TraesCS2B02G419600	35	46	61	204	186	196	1.54	1.93	2.43	8.5	8.45	9.03	1.96666666666667	8.66	2.13861457119868	7.12332330096624e-24	1.58778197966794e-21	HSFB2A	VAH50368.1 unnamed protein product [Triticum turgidum subsp. durum] [Triticum turgidum]
TraesCS3A02G245600	135	145	162	415	323	377	5.55	5.6	5.94	15.88	13.43	15.97	5.69666666666667	15.0933333333333	1.40572156115574	7.65265671135506e-24	1.70252698417527e-21	DI19-3	ACN96318.1 Di19 family protein [Triticum aestivum]
TraesCS7B02G310700	113	73	91	385	292	282	3.15	1.92	2.27	10.13	8.36	8.17	2.44666666666667	8.88666666666667	1.86082481224576	8.48578896639288e-24	1.88429600839702e-21	XAT3	VAI90907.1 unnamed protein product [Triticum turgidum subsp. durum] [Triticum turgidum]
TraesCS2D02G571500	186	211	186	462	488	427	1.79	1.92	1.61	4.18	4.82	4.27	1.77333333333333	4.42333333333333	1.31867021986901	9.2894900418175e-24	2.05885360544236e-21	NRPB1	SPT20986.1 unnamed protein product [Triticum aestivum]
TraesCS1D02G376700	3	3	10	133	102	94	0.14	0.13	0.42	5.89	4.92	4.59	0.23	5.13333333333333	4.48019017880409	9.35508444746997e-24	2.06947200796187e-21	ERF109	XP_020149093.1 ethylene-responsive transcription factor ERF109-like [Aegilops tauschii subsp. tauschii] [Aegilops tauschii]
TraesCS6A02G370500	119	158	147	373	356	349	2.79	3.51	3.1	8.25	8.59	8.52	3.13333333333333	8.45333333333333	1.43182208357441	9.85534758749259e-24	2.17602355732747e-21	At5g35200	VAI50952.1 unnamed protein product [Triticum turgidum subsp. durum] [Triticum turgidum]
TraesCS3D02G404100	246	264	249	563	499	531	5.52	5.6	5.01	11.85	11.47	12.35	5.37666666666667	11.89	1.14496477731117	1.0120092045542e-23	2.23027007787837e-21	GUX1	XP_020162029.1 UDP-glucuronate:xylan alpha-glucuronosyltransferase 1-like [Aegilops tauschii subsp. tauschii] [Aegilops tauschii]
TraesCS2B02G398400	16	9	24	149	144	111	0.34	0.18	0.47	3	3.17	2.47	0.33	2.88	3.12553088208386	1.02496277105197e-23	2.25457130439932e-21	PAL	VAH49844.1 unnamed protein product [Triticum turgidum subsp. durum] [Triticum turgidum]
TraesCS2B02G236900	96	128	79	498	376	283	1.82	2.31	1.35	8.91	7.32	5.59	1.82666666666667	7.27333333333333	1.99340330336308	1.11854415504276e-23	2.45580251616161e-21	B120	VAH45001.1 unnamed protein product [Triticum turgidum subsp. durum] [Triticum turgidum]
TraesCS7A02G198300	132	84	117	452	374	300	4.34	2.61	3.44	13.95	12.58	10.22	3.46333333333333	12.25	1.82254859570688	1.19962308982454e-23	2.62888189545782e-21	GATL9	XP_020169550.1 probable galacturonosyltransferase-like 9 [Aegilops tauschii subsp. tauschii] [Aegilops tauschii]
TraesCS7D02G254000	338	330	378	768	785	626	11.39	10.49	11.4	24.3	27.09	21.87	11.0933333333333	24.42	1.13837026756747	1.31598454594336e-23	2.87848866421277e-21	At4g12980	XP_020201631.1 cytochrome b561 and DOMON domain-containing protein At4g12980-like [Aegilops tauschii subsp. tauschii] [Aegilops tauschii]
TraesCS7D02G404500	175	152	175	515	378	396	3.52	2.88	3.15	9.75	7.78	8.26	3.18333333333333	8.59666666666667	1.43323913486611	1.34327642140474e-23	2.93270323480643e-21	XAT3	XP_020175359.1 EGF domain-specific O-linked N-acetylglucosamine transferase-like [Aegilops tauschii subsp. tauschii] [Aegilops tauschii]
TraesCS3B02G311700	181	192	256	519	457	463	6.05	6.06	7.66	16.31	15.64	16.05	6.59	16	1.27972153476667	1.36512675642302e-23	2.97485778938798e-21	DSP8	CDM84013.1 unnamed protein product [Triticum aestivum]
TraesCS2B02G045700	129	130	125	343	356	318	1.8	1.72	1.56	4.51	5.1	4.61	1.69333333333333	4.74	1.48502106284725	1.4101893454978e-23	3.06734530834281e-21	At3g14460	VAH40492.1 unnamed protein product [Triticum turgidum subsp. durum] [Triticum turgidum]
TraesCS3D02G041800	5	11	6	98	125	101	0.15	0.32	0.16	2.81	3.91	3.2	0.21	3.30666666666667	3.97691638688696	1.99259911736307e-23	4.32612122285828e-21	CBP60B	XP_020153225.1 calmodulin-binding protein 60 B-like [Aegilops tauschii subsp. tauschii] [Aegilops tauschii]
TraesCS3A02G328000	113	88	101	303	384	291	5.58	4.1	4.46	14.05	19.41	14.9	4.71333333333333	16.12	1.77403212443973	2.08989249290777e-23	4.52895183898245e-21	ERF4	ABC65860.1 ethylene-responsive factor-like transcription factor ERFL1c [Triticum aestivum]
TraesCS7A02G398900	4	5	11	129	105	88	0.12	0.17	0.31	3.87	3.32	2.83	0.2	3.34	4.06177619758669	2.80349908916631e-23	6.06416026640332e-21	CYP73A12	VAI78557.1 unnamed protein product [Triticum turgidum subsp. durum] [Triticum turgidum]
TraesCS6A02G305800	91	64	82	304	293	228	2.63	1.75	2.12	8.25	8.68	6.84	2.16666666666667	7.92333333333333	1.87063028002662	3.51148497188872e-23	7.58156816199929e-21	At3g28850	VAI49335.1 unnamed protein product [Triticum turgidum subsp. durum] [Triticum turgidum]
TraesCS7B02G152000	270	284	306	576	590	557	9.44	9.37	9.57	18.92	21.11	20.18	9.46	20.07	1.08512852802322	3.60271094982582e-23	7.76420701234839e-21	At4g12980	VAI86338.1 unnamed protein product [Triticum turgidum subsp. durum] [Triticum turgidum]
TraesCS5D02G201200	19	36	44	208	184	143	0.55	0.97	1.13	5.61	5.4	4.26	0.883333333333333	5.09	2.52663579734629	3.96313070983256e-23	8.52524782952254e-21	--	XP_020177466.1 homeobox protein abdominal-A-like [Aegilops tauschii subsp. tauschii] [Aegilops tauschii]
TraesCS5D02G321000	40	32	40	210	149	164	1.36	1.03	1.2	6.63	5.12	5.71	1.19666666666667	5.82	2.28199780980638	4.65813224805811e-23	9.98358886322814e-21	HSFB2C	XP_020163127.1 heat stress transcription factor B-2c-like [Aegilops tauschii subsp. tauschii] [Aegilops tauschii]
TraesCS7D02G373100	2094	2921	2846	1074	842	1210	73.34	96.54	89.19	35.37	30.18	43.91	86.3566666666667	36.4866666666667	-1.24294	4.75253573202613e-23	1.01672986550852e-20	THI1-2	XP_020185336.1 thiamine thiazole synthase 2, chloroplastic [Aegilops tauschii subsp. tauschii] [Aegilops tauschii]
TraesCS4A02G290400	375	377	511	96	132	113	11.17	10.6	13.63	2.69	4.02	3.48	11.8	3.39666666666667	-1.7966	4.86538934691416e-23	1.03897370831129e-20	THIC	VAH95766.1 unnamed protein product [Triticum turgidum subsp. durum] [Triticum turgidum]
TraesCS4A02G453500	2296	2134	2268	943	1005	1106	35.41	31.06	31.31	13.66	15.86	17.68	32.5933333333333	15.7333333333333	-1.05075	5.3059747310866e-23	1.13099412564885e-20	--	VAI68828.1 unnamed protein product [Triticum turgidum subsp. durum] [Triticum turgidum]
TraesCS2A02G196400	0	1	5	148	124	138	0	0.03	0.13	3.98	3.63	4.1	0.0533333333333333	3.90333333333333	6.19352536050121	6.14166829092602e-23	1.3067460122559e-20	PAL	VAH28689.1 unnamed protein product [Triticum turgidum subsp. durum] [Triticum turgidum]
TraesCS4B02G287100	16	13	6	144	125	95	1.47	1.13	0.49	12.41	11.78	9.07	1.03	11.0866666666667	3.4281094253829	6.85242283918832e-23	1.45532527311705e-20	--	VAI09332.1 unnamed protein product [Triticum turgidum subsp. durum] [Triticum turgidum]
TraesCS4D02G145500	1	1	5	100	167	131	0.07	0.06	0.3	6.26	11.4	9.05	0.143333333333333	8.90333333333333	5.95689950593301	7.07945240146754e-23	1.50081825892126e-20	HSP18	XP_020199271.1 17.5 kDa class II heat shock protein-like [Aegilops tauschii subsp. tauschii] [Aegilops tauschii]
TraesCS2A02G182400	21	21	26	143	116	147	0.31	0.3	0.35	2.01	1.77	2.27	0.32	2.01666666666667	2.6558288314408	8.41353612255537e-23	1.78041378686017e-20	At1g74360	VAH28338.1 unnamed protein product [Triticum turgidum subsp. durum] [Triticum turgidum]
TraesCS2B02G295300	278	259	291	552	615	572	11.04	9.71	10.33	20.57	24.97	23.5	10.36	23.0133333333333	1.15144596077124	8.84468789487826e-23	1.86827268381669e-20	CEQORH	VAH47093.1 unnamed protein product [Triticum turgidum subsp. durum] [Triticum turgidum]
TraesCS4B02G112500	43	35	42	187	217	151	1.39	1.07	1.22	5.69	7.2	5.07	1.22666666666667	5.98666666666667	2.28700967868413	9.59029696929287e-23	2.02211843592899e-20	ROH1	VAI03558.1 unnamed protein product [Triticum turgidum subsp. durum] [Triticum turgidum]
TraesCS2D02G193400	51	39	41	218	202	157	2.59	1.74	1.79	9.66	9.77	7.72	2.04	9.05	2.14934863999907	1.02084451392146e-22	2.14858393359923e-20	LBD37	SPT17141.1 unnamed protein product [Triticum aestivum]
TraesCS3A02G300600	50	54	56	194	220	186	1.21	1.24	1.21	4.4	5.47	4.67	1.22	4.84666666666667	1.99011171563555	1.07816064967498e-22	2.26253107500752e-20	--	VAH64303.1 unnamed protein product [Triticum turgidum subsp. durum] [Triticum turgidum]
TraesCS3A02G277200	16	7	17	109	143	114	1.14	0.47	1.09	7.32	10.46	8.45	0.9	8.74333333333333	3.28018649521415	1.07885042116371e-22	2.26253107500752e-20	--	VAH63572.1 unnamed protein product [Triticum turgidum subsp. durum] [Triticum turgidum]
TraesCS7D02G190600	9	5	8	151	99	82	0.28	0.15	0.22	4.37	3.12	2.62	0.216666666666667	3.37	3.95919946887456	1.30024816479587e-22	2.72196137282186e-20	UGT73C5	XP_020181196.1 UDP-glycosyltransferase 73C5-like [Aegilops tauschii subsp. tauschii] [Aegilops tauschii]
TraesCS5A02G137700	47	38	36	204	201	150	1.24	0.93	0.85	5.05	5.43	4.09	1.00666666666667	4.85666666666667	2.27038042273943	1.38548506455043e-22	2.89521845042536e-20	HMGCL	VAI15769.1 unnamed protein product [Triticum turgidum subsp. durum] [Triticum turgidum]
TraesCS4B02G092500	3	3	6	103	96	102	0.13	0.12	0.23	4.1	4.17	4.48	0.16	4.25	4.73131903102506	1.39532953977467e-22	2.91059275229076e-20	CRK36	VAI02961.1 unnamed protein product [Triticum turgidum subsp. durum] [Triticum turgidum]
TraesCS6D02G332400	163	153	173	450	528	356	4	3.54	3.8	10.37	13.26	9.05	3.78	10.8933333333333	1.52698734320345	1.40662859659799e-22	2.9289411322258e-20	CYPRO4	XP_020149747.1 protein CYPRO4-like [Aegilops tauschii subsp. tauschii] [Aegilops tauschii]
TraesCS3B02G426600	83	100	102	358	294	236	1.72	1.95	1.9	6.99	6.26	5.08	1.85666666666667	6.11	1.71845755319985	1.78746347027045e-22	3.71532060777956e-20	PUB45	VAH82654.1 unnamed protein product [Triticum turgidum subsp. durum] [Triticum turgidum]
TraesCS5B02G272900	13	20	27	146	139	113	0.64	0.94	1.2	6.8	7.05	5.8	0.926666666666667	6.55	2.82137252442246	1.83476206282098e-22	3.80687103041554e-20	--	VAI33954.1 unnamed protein product [Triticum turgidum subsp. durum] [Triticum turgidum]
TraesCS5B02G320500	89	94	121	290	297	270	2.15	2.14	2.62	6.59	7.34	6.77	2.30333333333333	6.9	1.58287315199843	1.89509740104139e-22	3.92509890379939e-20	PRR95	VAI34993.1 unnamed protein product [Triticum turgidum subsp. durum] [Triticum turgidum]
TraesCS2A02G416900	33	40	38	187	160	147	1.3	1.49	1.34	6.93	6.45	6	1.37666666666667	6.46	2.23035488399563	2.08900401116758e-22	4.31907115538609e-20	NUDT8	VAH35525.1 unnamed protein product [Triticum turgidum subsp. durum] [Triticum turgidum]
TraesCS3D02G140700	164	197	170	535	564	368	4.19	4.75	3.89	12.83	14.75	9.73	4.27666666666667	12.4366666666667	1.5400411897271	2.31751280314681e-22	4.78306848765161e-20	HT1	XP_020191961.1 probable serine/threonine-protein kinase DDB_G0267514 [Aegilops tauschii subsp. tauschii] [Aegilops tauschii]
TraesCS1A02G273500	70	69	67	248	209	216	3.69	3.43	3.16	12.26	11.26	11.79	3.42666666666667	11.77	1.78023655656572	2.33174277981111e-22	4.80396485174393e-20	IPP	XP_020167654.1 soluble inorganic pyrophosphatase-like [Aegilops tauschii subsp. tauschii] [Aegilops tauschii]
TraesCS7A02G451100	106	105	147	344	431	303	4.48	4.19	5.56	13.66	18.67	13.28	4.74333333333333	15.2033333333333	1.68041450833127	2.74065938180191e-22	5.63651040733256e-20	HSA32	XP_020157434.1 protein HEAT-STRESS-ASSOCIATED 32 [Aegilops tauschii subsp. tauschii] [Aegilops tauschii]
TraesCS2A02G183900	358	367	310	774	740	649	7.27	7.04	5.64	14.77	15.39	13.67	6.65	14.61	1.13552993241495	3.56295498577031e-22	7.31480909376865e-20	GH3.8	VAH28380.1 unnamed protein product [Triticum turgidum subsp. durum] [Triticum turgidum]
TraesCS7A02G129300	119	129	159	360	416	317	3.99	4.09	4.78	11.35	14.28	11.03	4.28666666666667	12.22	1.51131614321194	3.75247276162801e-22	7.69040048180793e-20	At3g15890	XP_020159011.1 PTI1-like tyrosine-protein kinase At3g15890 [Aegilops tauschii subsp. tauschii] [Aegilops tauschii]
TraesCS5D02G307800LC	69	66	74	331	220	207	2.61	2.36	2.49	11.73	8.51	8.08	2.48666666666667	9.44	1.92457372982776	3.94011905234156e-22	8.06084985564884e-20	--	BAS94872.1 Os05g0514250, partial [Oryza sativa Japonica Group]
TraesCS5A02G555100	218	234	289	67	42	52	12.75	12.92	15.12	3.68	2.51	3.15	13.5966666666667	3.11333333333333	-2.12672	4.21282618220542e-22	8.58873424205649e-20	--	VAI26035.1 unnamed protein product [Triticum turgidum subsp. durum] [Triticum turgidum]
TraesCS4D02G270900	5	2	4	118	87	97	0.34	0.13	0.24	7.49	6.02	6.81	0.236666666666667	6.77333333333333	4.83893756726748	4.297624085977e-22	8.74637505720349e-20	UCC1	XP_020193260.1 mavicyanin-like [Aegilops tauschii subsp. tauschii] [Aegilops tauschii]
TraesCS1B02G283300	100	62	87	314	255	260	5.26	3.06	4.08	15.44	13.65	14.11	4.13333333333333	14.4	1.80069119177659	4.47854337728667e-22	9.0987517898757e-20	IPP	XP_020167654.1 soluble inorganic pyrophosphatase-like [Aegilops tauschii subsp. tauschii] [Aegilops tauschii]
TraesCS4A02G072100	5	11	15	129	127	84	0.14	0.28	0.36	3.29	3.53	2.36	0.26	3.06	3.55694812455156	4.51963769783121e-22	9.16632656283543e-20	ERD7	XP_020154857.1 protein EARLY-RESPONSIVE TO DEHYDRATION 7, chloroplastic-like [Aegilops tauschii subsp. tauschii] [Aegilops tauschii]
TraesCS7A02G262200LC	1	5	9	104	115	85	0.03	0.13	0.23	2.76	3.32	2.49	0.13	2.85666666666667	4.45774917525025	4.64821275777317e-22	9.41078119965627e-20	PUB21	XP_020179916.1 U-box domain-containing protein 21-like [Aegilops tauschii subsp. tauschii] [Aegilops tauschii]
TraesCS2D02G378400	203	172	170	521	437	397	8.62	6.93	6.46	20.83	19.04	17.5	7.33666666666667	19.1233333333333	1.38213737276041	4.67623467672313e-22	9.45116294196016e-20	MYB4	SPT19184.1 unnamed protein product [Triticum aestivum]
TraesCS1A02G370600	8	1	1	133	115	83	0.37	0.04	0.04	5.72	5.39	3.94	0.15	5.01666666666667	5.06369467531739	5.06824735204375e-22	1.02258007177735e-19	ERF109	VAH11082.1 unnamed protein product [Triticum turgidum subsp. durum] [Triticum turgidum]
TraesCS3D02G153400	777	1052	959	341	210	356	19.88	25.39	21.95	8.18	5.51	9.44	22.4066666666667	7.71	-1.53913	5.54735398941349e-22	1.11731920576445e-19	GLU5	XP_020189544.1 endoglucanase 2-like [Aegilops tauschii subsp. tauschii] [Aegilops tauschii]
TraesCS3D02G289000	71	72	87	264	254	209	2.84	2.72	3.11	9.91	10.39	8.66	2.89	9.65333333333333	1.73995770386137	5.68500406540674e-22	1.14307653907565e-19	HSFA4B	XP_020165982.1 heat stress transcription factor A-4b [Aegilops tauschii subsp. tauschii] [Aegilops tauschii]
TraesCS6B02G127100	77	54	100	289	334	231	3.5	2.32	4.07	12.34	15.55	10.89	3.29666666666667	12.9266666666667	1.97127037734768	6.12442611944933e-22	1.22931834193859e-19	--	VAI54809.1 unnamed protein product [Triticum turgidum subsp. durum] [Triticum turgidum]
TraesCS4A02G079700	54	48	51	242	168	185	1.44	1.2	1.21	6.04	4.57	5.1	1.28333333333333	5.23666666666667	2.02875282971194	7.41868823875452e-22	1.48401664115476e-19	ACR8	VAH88823.1 unnamed protein product [Triticum turgidum subsp. durum] [Triticum turgidum]
TraesCS6B02G238000	310	323	384	694	691	598	9.25	9.12	10.27	19.48	21.14	18.53	9.54666666666667	19.7166666666667	1.0463466759629	7.62491953139893e-22	1.5226678044426e-19	--	VAI58034.1 unnamed protein product [Triticum turgidum subsp. durum] [Triticum turgidum]
TraesCS7D02G282500	446	378	446	790	794	830	15.94	12.73	14.27	26.49	29.03	30.71	14.3133333333333	28.7433333333333	1.00586768880798	8.26117913846438e-22	1.64411514479826e-19	Ahsa1	XP_020154607.1 activator of 90 kDa heat shock protein ATPase homolog [Aegilops tauschii subsp. tauschii] [Aegilops tauschii]
TraesCS7D02G513300	209	223	227	479	466	438	7.62	7.67	7.4	16.39	17.38	16.54	7.56333333333333	16.77	1.14878858061317	8.51225381093169e-22	1.69120707209312e-19	--	EMS59188.1 hypothetical protein TRIUR3_04856 [Triticum urartu]
TraesCS3B02G132900	11	4	7	141	95	83	0.65	0.22	0.37	7.83	5.75	5.09	0.413333333333333	6.22333333333333	3.91230990183933	8.71286718031837e-22	1.72813075114443e-19	--	CDM81655.1 unnamed protein product [Triticum aestivum]
TraesCS1D02G273500	122	149	150	516	389	306	5.62	6.51	6.21	22.43	18.45	14.68	6.11333333333333	18.52	1.59905296038634	9.39988659906491e-22	1.86124116682872e-19	IPP	XP_020167654.1 soluble inorganic pyrophosphatase-like [Aegilops tauschii subsp. tauschii] [Aegilops tauschii]
TraesCS1A02G363800	50	54	67	200	252	188	1.54	1.76	1.86	6.32	8.59	6.96	1.72	7.29	2.08351024962484	1.02101364478737e-21	2.01826112737006e-19	rutD	VAH09988.1 unnamed protein product [Triticum turgidum subsp. durum] [Triticum turgidum]
TraesCS3B02G354000	39	49	60	179	209	184	1.22	1.43	1.68	5.22	6.64	5.9	1.44333333333333	5.92	2.03619265162338	1.02934862080375e-21	2.03130580613315e-19	PER56	CDM84504.1 unnamed protein product [Triticum aestivum]
TraesCS4B02G194000	19	5	16	121	141	106	0.7	0.17	0.53	4.2	5.33	4.06	0.466666666666667	4.53	3.27904672382242	1.08248737859865e-21	2.13257303061232e-19	Os03g0292100	VAI06715.1 unnamed protein product [Triticum turgidum subsp. durum] [Triticum turgidum]
TraesCS4B02G299700	51	38	61	231	187	173	2.9	2.04	3.11	12.35	10.89	10.21	2.68333333333333	11.15	2.05494552252685	1.42295680338436e-21	2.79860926127134e-19	RAP2-3	QBC40984.1 ethylene response factor [Triticum aestivum]
TraesCS2B02G578500	89	82	116	353	308	235	1.65	1.43	1.92	6.13	5.82	4.51	1.66666666666667	5.48666666666667	1.71896433575954	1.56128683238141e-21	3.06551858555263e-19	ARF12	VAH54110.1 unnamed protein product [Triticum turgidum subsp. durum] [Triticum turgidum]
TraesCS4A02G404800	115	93	143	416	308	297	10.21	7.79	11.36	34.69	27.99	27.34	9.78666666666667	30.0066666666667	1.61639359654234	1.74243407338884e-21	3.41546264884605e-19	--	-
TraesCS2B02G529400	156	114	139	447	391	314	8.13	5.61	6.48	21.88	20.86	16.96	6.74	19.9	1.56194793424915	2.00950462249325e-21	3.93237876142818e-19	OsI_07012	ACT32453.1 C2 domain-containing protein [Triticum aestivum]
TraesCS4D02G194900	14	12	21	116	148	100	0.5	0.4	0.67	3.9	5.4	3.72	0.523333333333333	4.34	3.05189298427401	2.18153611497397e-21	4.26189848491626e-19	Os03g0292100	XP_020192867.1 probable protein phosphatase 2C 32 [Aegilops tauschii subsp. tauschii] [Aegilops tauschii]
TraesCS5B02G193500	48	46	55	270	211	151	1.44	1.3	1.48	7.61	6.49	4.69	1.40666666666667	6.26333333333333	2.15465016271287	2.36260019433476e-21	4.60026954977441e-19	VQ22	VAI31991.1 unnamed protein product [Triticum turgidum subsp. durum] [Triticum turgidum]
TraesCS6A02G227900	773	901	897	396	377	330	19.27	21.18	20	9.26	9.61	8.52	20.15	9.13	-1.14209	2.37324288517697e-21	4.60566548771442e-19	PRR1	AMK48975.1 timing of cab expression 1 [Triticum aestivum]
TraesCS5A02G271500	116	128	130	368	339	275	2.51	2.61	2.53	7.48	7.51	6.17	2.55	7.05333333333333	1.46780797453401	2.47686636770432e-21	4.79880556426315e-19	NAC017	XP_020192727.1 uncharacterized protein LOC109778571 [Aegilops tauschii subsp. tauschii] [Aegilops tauschii]
TraesCS5A02G297900	158	158	194	428	400	352	5.28	4.97	5.78	13.38	13.66	12.15	5.34333333333333	13.0633333333333	1.28971114744766	2.69058122287197e-21	5.204251171288e-19	PTI11	VAI19749.1 unnamed protein product [Triticum turgidum subsp. durum] [Triticum turgidum]
TraesCS5B02G490700	8	7	17	115	119	88	0.65	0.54	1.23	8.75	9.87	7.39	0.806666666666667	8.67	3.4259874466684	2.83424572789281e-21	5.47308751764806e-19	ZAT5	VAI39053.1 unnamed protein product [Triticum turgidum subsp. durum] [Triticum turgidum]
TraesCS7D02G516100	21	15	14	107	120	128	0.81	0.54	0.47	3.9	4.79	5.16	0.606666666666667	4.61666666666667	2.92787562073785	3.09983593226366e-21	5.97609555956109e-19	At5g10770	XP_020160808.1 aspartic proteinase nepenthesin-2-like [Aegilops tauschii subsp. tauschii] [Aegilops tauschii]
TraesCS6D02G289800	9	5	9	85	118	93	0.76	0.4	0.68	6.76	10.2	8.14	0.613333333333333	8.36666666666667	3.76990969278112	4.01537392742264e-21	7.72840604827059e-19	--	VAI49480.1 unnamed protein product [Triticum turgidum subsp. durum] [Triticum turgidum]
TraesCS3D02G321500	76	82	120	316	311	236	3.85	3.92	5.44	15.03	16.12	12.39	4.40333333333333	14.5133333333333	1.72071094094138	4.25753506045291e-21	8.18103888085912e-19	ERF9	XP_020155336.1 ethylene-responsive transcription factor 4-like [Aegilops tauschii subsp. tauschii] [Aegilops tauschii]
TraesCS5D02G185100	54	67	68	248	220	179	2.66	3.11	3	11.46	11.08	9.13	2.92333333333333	10.5566666666667	1.85246811958346	4.3441552593616e-21	8.33379896329531e-19	--	XP_020201434.1 uncharacterized protein LOC109787290 [Aegilops tauschii subsp. tauschii] [Aegilops tauschii]
TraesCS7D02G357400	12	2	15	342	304	254	1.15	0.18	1.29	30.85	29.89	25.29	0.873333333333333	28.6766666666667	5.03720112089282	4.95534111004413e-21	9.49073530899483e-19	--	-
TraesCS2B02G210600	286	293	272	559	559	574	7.47	7.23	6.36	13.72	14.94	15.53	7.02	14.73	1.06921449473129	5.02145970867337e-21	9.60165454294731e-19	GH3.8	VAH44227.1 unnamed protein product [Triticum turgidum subsp. durum] [Triticum turgidum]
TraesCS3D02G408900	232	230	260	578	549	439	6.9	6.36	6.78	16.56	16.83	13.46	6.68	15.6166666666667	1.22516653935134	5.25653431144273e-21	1.00347497258344e-18	RGLG2	XP_020188493.1 E3 ubiquitin-protein ligase RGLG2-like [Aegilops tauschii subsp. tauschii] [Aegilops tauschii]
TraesCS4B02G056600	10	4	3	105	105	79	0.27	0.1	0.07	2.63	2.88	2.18	0.146666666666667	2.56333333333333	4.12740816932452	6.01312141259661e-21	1.14417478690225e-18	BHLH25	VAI01918.1 unnamed protein product [Triticum turgidum subsp. durum] [Triticum turgidum]
TraesCS6B02G207000	185	185	239	511	612	412	6.15	5.81	7.09	15.93	20.82	14.18	6.35	16.9766666666667	1.41872471951685	6.25791751387145e-21	1.18882146640952e-18	KCS11	VAI56944.1 unnamed protein product [Triticum turgidum subsp. durum] [Triticum turgidum]
TraesCS7D02G150200	71	75	114	264	340	250	0.99	1	1.43	3.36	4.72	3.51	1.14	3.86333333333333	1.76081233612057	7.03643338143918e-21	1.33455025472087e-18	INRPK1	XP_020169542.1 receptor-like protein kinase [Aegilops tauschii subsp. tauschii] [Aegilops tauschii]
TraesCS4D02G224900	39	42	51	189	171	153	0.96	0.98	1.12	4.37	4.31	3.9	1.02	4.19333333333333	2.03952836418664	7.70795106676284e-21	1.45954668241864e-18	ACR8	XP_020199563.1 ACT domain-containing protein ACR8-like [Aegilops tauschii subsp. tauschii] [Aegilops tauschii]
TraesCS5A02G400700	8	13	19	141	117	86	0.54	0.83	1.15	8.93	8.08	6.01	0.84	7.67333333333333	3.19139219463231	8.21400058471442e-21	1.55285747402981e-18	--	VAI37096.1 unnamed protein product [Triticum turgidum subsp. durum] [Triticum turgidum]
TraesCS3B02G310000	5	10	7	84	96	101	0.08	0.15	0.1	1.27	1.58	1.68	0.11	1.51	3.77897312068778	8.66224508722552e-21	1.63495684612468e-18	BAM1	VAH79322.1 unnamed protein product [Triticum turgidum subsp. durum] [Triticum turgidum]
TraesCS6B02G174500	201	212	257	438	543	523	3.19	3.18	3.66	6.53	8.82	8.61	3.34333333333333	7.98666666666667	1.25630630217661	8.72570574098096e-21	1.64428266863297e-18	CLPB3	VAI56015.1 unnamed protein product [Triticum turgidum subsp. durum] [Triticum turgidum]
TraesCS4B02G175600	33	54	57	249	170	171	1.28	1.98	1.98	9.1	6.76	6.87	1.74666666666667	7.57666666666667	2.1169589672804	9.5250639310391e-21	1.79202898928948e-18	LEA17	VAI06142.1 unnamed protein product [Triticum turgidum subsp. durum] [Triticum turgidum]
TraesCS2A02G099900	71	51	89	222	243	243	2.19	1.49	2.46	6.46	7.72	7.81	2.04666666666667	7.33	1.84053704348479	1.08744256824195e-20	2.0426116247321e-18	EIL2	VAH26248.1 unnamed protein product [Triticum turgidum subsp. durum] [Triticum turgidum]
TraesCS5D02G373100	16	12	9	119	95	101	0.74	0.53	0.37	5.18	4.51	4.85	0.546666666666667	4.84666666666667	3.14825954930151	1.09648886736251e-20	2.0563032089182e-18	OsI_33147	XP_020196852.1 CASP-like protein 5A3 [Aegilops tauschii subsp. tauschii] [Aegilops tauschii]
TraesCS1B02G287500	95	104	127	335	285	256	2.57	2.66	3.09	8.51	7.89	7.18	2.77333333333333	7.86	1.50290828483867	1.23817090182079e-20	2.31829176436596e-18	--	VAH19735.1 unnamed protein product [Triticum turgidum subsp. durum] [Triticum turgidum]
TraesCS5A02G454500	221	198	263	554	509	434	7.44	6.31	7.95	17.54	17.57	15.19	7.23333333333333	16.7666666666667	1.21286335736105	1.31281712565787e-20	2.45412916419705e-18	SS1	VAI23651.1 unnamed protein product [Triticum turgidum subsp. durum] [Triticum turgidum]
TraesCS1D02G085900	57	37	62	277	229	160	1.83	1.13	1.79	8.35	7.52	5.33	1.58333333333333	7.06666666666667	2.15806484623226	1.32623733311016e-20	2.47502550215418e-18	At3g05170	XP_020147862.1 phosphoglycerate mutase-like protein AT74H [Aegilops tauschii subsp. tauschii] [Aegilops tauschii]
TraesCS4D02G340800	15	11	14	118	96	100	0.66	0.45	0.55	4.84	4.29	4.53	0.553333333333333	4.55333333333333	3.04070233694317	1.32822547499857e-20	2.47502550215418e-18	--	XP_020184597.1 uncharacterized protein LOC109770300 [Aegilops tauschii subsp. tauschii] [Aegilops tauschii]
MSTRG.79612	51	55	91	250	280	196	2.28	2.32	3.65	10.51	12.83	9.1	2.75	10.8133333333333	1.97530779508409	1.51559557034563e-20	2.81968242977721e-18	--	-
TraesCS4D02G110000	21	10	26	168	167	94	0.59	0.28	0.67	4.54	4.92	2.82	0.513333333333333	4.09333333333333	2.99530830467528	1.64098597793788e-20	3.04811843032137e-18	ROH1	XP_020183828.1 uncharacterized protein LOC109769506 [Aegilops tauschii subsp. tauschii] [Aegilops tauschii]
TraesCS3D02G401200	210	236	266	524	448	463	7.78	8.25	8.82	18.23	16.99	17.78	8.28333333333333	17.6666666666667	1.09274650788828	1.71019267664135e-20	3.17163498266124e-18	NAC048	XP_020187949.1 NAC domain-containing protein 48-like [Aegilops tauschii subsp. tauschii] [Aegilops tauschii]
TraesCS7D02G252300	1	1	5	109	96	103	0.05	0.05	0.22	5.06	4.85	5.27	0.106666666666667	5.06	5.56795607541546	1.90865009220649e-20	3.53408308687005e-18	ATL16	XP_020146501.1 RING-H2 finger protein ATL16-like [Aegilops tauschii subsp. tauschii] [Aegilops tauschii]
TraesCS1D02G029500	115	101	129	350	346	258	2	1.66	1.99	5.69	6.13	4.62	1.88333333333333	5.48	1.54088752637914	1.9403875962445e-20	3.58717278495614e-18	At3g21620	XP_020195801.1 CSC1-like protein At3g21620 [Aegilops tauschii subsp. tauschii] [Aegilops tauschii]
TraesCS7B02G082000	4	5	10	95	91	84	0.27	0.32	0.61	6.11	6.37	5.95	0.4	6.14333333333333	3.94094976002219	2.0211355385967e-20	3.73055714507355e-18	--	VAI72079.1 unnamed protein product [Triticum turgidum subsp. durum] [Triticum turgidum]
TraesCS4D02G340500	12	19	23	108	117	124	0.22	0.34	0.39	1.9	2.24	2.41	0.316666666666667	2.18333333333333	2.78549548809386	2.07226071614034e-20	3.81289455226689e-18	THE1	XP_020150974.1 probable receptor-like protein kinase At5g24010 [Aegilops tauschii subsp. tauschii] [Aegilops tauschii]
TraesCS1D02G139400	251	226	264	510	514	479	9.31	7.92	8.76	17.76	19.51	18.41	8.66333333333333	18.56	1.09920257737653	2.47288000915943e-20	4.53575806319523e-18	HIPP06	XP_020163240.1 heavy metal-associated isoprenylated plant protein 3-like [Aegilops tauschii subsp. tauschii] [Aegilops tauschii]
TraesCS2B02G212400	35	33	45	176	137	158	1.85	1.65	2.13	8.74	7.39	8.64	1.87666666666667	8.25666666666667	2.13738704116613	2.52137513194343e-20	4.61025563578568e-18	LBD37	VAH44252.1 unnamed protein product [Triticum turgidum subsp. durum] [Triticum turgidum]
TraesCS4B02G038800	335	283	330	619	706	614	13.45	10.72	11.85	23.33	29.02	25.55	12.0066666666667	25.9666666666667	1.11282514704275	2.80612688089034e-20	5.12291076217705e-18	--	VAI01423.1 unnamed protein product [Triticum turgidum subsp. durum] [Triticum turgidum]
TraesCS7D02G088500	193	224	190	515	381	476	13.28	14.55	11.7	33.29	26.84	33.96	13.1766666666667	31.3633333333333	1.25109344455464	3.05914056236705e-20	5.57611755279309e-18	--	VAI69932.1 unnamed protein product [Triticum turgidum subsp. durum] [Triticum turgidum]
TraesCS1A02G238800	26	20	26	207	137	103	1.74	1.26	1.54	13.01	9.42	7.15	1.51333333333333	9.86	2.70385784980816	3.06830982040038e-20	5.58413299848978e-18	CML15	VAH06879.1 unnamed protein product [Triticum turgidum subsp. durum] [Triticum turgidum]
TraesCS6A02G139400	29	34	40	200	138	134	0.86	0.96	1.06	5.61	4.2	4.15	0.96	4.65333333333333	2.27715822476734	3.15004594720877e-20	5.72398566512834e-18	CRPK1	VAI44228.1 unnamed protein product [Triticum turgidum subsp. durum] [Triticum turgidum]
TraesCS5A02G163600	43	36	76	183	261	217	1.21	0.98	1.79	4.57	6.86	5.92	1.32666666666667	5.78333333333333	2.12409532692197	3.20594985035765e-20	5.81653741687679e-18	--	VAI30821.1 unnamed protein product [Triticum turgidum subsp. durum] [Triticum turgidum]
TraesCS5A02G512300	22	29	21	134	127	121	0.58	0.72	0.49	3.31	3.42	3.3	0.596666666666667	3.34333333333333	2.48629011334792	3.2747198232988e-20	5.93210933687419e-18	--	XP_020197400.1 uncharacterized protein LOC109783212 [Aegilops tauschii subsp. tauschii] [Aegilops tauschii]
TraesCS1D02G273200	113	75	95	285	296	263	3.03	1.9	2.29	7.17	8.11	7.3	2.40666666666667	7.52666666666667	1.64497474388583	3.33631871115959e-20	6.03435375915484e-18	TULP8	XP_020178570.1 tubby-like F-box protein 8 isoform X1 [Aegilops tauschii subsp. tauschii] [Aegilops tauschii]
TraesCS5D02G190700	12	14	19	90	144	114	0.45	0.5	0.64	3.2	5.59	4.48	0.53	4.42333333333333	3.06106970008584	3.53642891894195e-20	6.38641952087075e-18	WRKY53	XP_020200629.1 WRKY transcription factor WRKY62-like [Aegilops tauschii subsp. tauschii] [Aegilops tauschii]
TraesCS1D02G223900LC	38	23	59	177	183	183	1.16	0.66	1.61	5.07	5.72	5.79	1.14333333333333	5.52666666666667	2.27316352532294	3.98629172918598e-20	7.18773236876427e-18	--	VAH16195.1 unnamed protein product [Triticum turgidum subsp. durum] [Triticum turgidum]
TraesCS6D02G192500	277	245	326	679	748	516	7.7	6.41	8.1	17.7	21.28	14.85	7.40333333333333	17.9433333333333	1.27720103247245	4.54374950373417e-20	8.18028699116893e-18	--	XP_020173038.1 beta-1,4-mannosyl-glycoprotein 4-beta-N-acetylglucosaminyltransferase-like [Aegilops tauschii subsp. tauschii] [Aegilops tauschii]
TraesCS5A02G257700	4	10	3	75	102	100	0.25	0.58	0.16	4.32	6.4	6.36	0.33	5.69333333333333	4.10873563954088	5.25734662082683e-20	9.45046415149611e-18	HSP21	EMS51641.1 hypothetical protein TRIUR3_21060 [Triticum urartu]
TraesCS6D02G296200	4	11	6	99	108	74	0.17	0.44	0.23	3.92	4.66	3.23	0.28	3.93666666666667	3.8134758266184	5.27297249440323e-20	9.46401514171863e-18	PHI-1	XP_020171835.1 protein EXORDIUM-like [Aegilops tauschii subsp. tauschii] [Aegilops tauschii]
TraesCS5D02G102100	11	17	11	148	89	94	0.27	0.4	0.24	3.43	2.25	2.41	0.303333333333333	2.69666666666667	3.15220125223128	5.40542114418464e-20	9.6868789147745e-18	CBP60D	XP_020170189.1 calmodulin-binding protein 60 D-like isoform X1 [Aegilops tauschii subsp. tauschii] [Aegilops tauschii]
TraesCS1D02G293400	188	148	205	431	421	387	4.48	3.33	4.36	9.65	10.27	9.55	4.05666666666667	9.82333333333333	1.27591789241027	6.57755953438733e-20	1.17156647158763e-17	EXO70B1	XP_020169649.1 exocyst complex component EXO70B1-like [Aegilops tauschii subsp. tauschii] [Aegilops tauschii]
TraesCS5A02G090000	6	7	4	126	85	68	0.14	0.15	0.08	2.78	2.04	1.66	0.123333333333333	2.16	4.13039663725568	8.29433174870114e-20	1.47286690424356e-17	CBP60D	VAI14164.1 unnamed protein product [Triticum turgidum subsp. durum] [Triticum turgidum]
TraesCS1B02G136800	68	67	91	227	247	210	5.58	5.19	6.68	17.47	20.79	17.86	5.81666666666667	18.7066666666667	1.68528797252289	9.30777311194618e-20	1.64782787459329e-17	--	XP_020186167.1 uncharacterized protein LOC109771888 [Aegilops tauschii subsp. tauschii] [Aegilops tauschii]
TraesCS5D02G228600	214	210	218	488	456	402	9.47	8.79	8.67	20.34	20.72	18.47	8.97666666666667	19.8433333333333	1.14440266452644	9.34697685360892e-20	1.65226876943055e-17	TET7	XP_020165195.1 tetraspanin-8 [Aegilops tauschii subsp. tauschii] [Aegilops tauschii]
TraesCS5A02G477600	2	2	12	107	92	79	0.15	0.14	0.78	7.32	6.86	5.96	0.356666666666667	6.71333333333333	4.23438098160564	1.06436252984859e-19	1.87581072240877e-17	ZAT5	VAI24168.1 unnamed protein product [Triticum turgidum subsp. durum] [Triticum turgidum]
TraesCS6D02G310700	82	83	43	380	266	221	3.55	3.38	1.66	15.41	11.77	9.91	2.86333333333333	12.3633333333333	2.11030023136454	1.06662406126367e-19	1.87696963755183e-17	FLS	XP_020198934.1 flavonol synthase/flavanone 3-hydroxylase-like [Aegilops tauschii subsp. tauschii] [Aegilops tauschii]
MSTRG.91913	3	3	2	99	74	103	0.13	0.12	0.08	4.01	3.26	4.6	0.11	3.95666666666667	5.16871010028345	1.56254444077773e-19	2.74141042801636e-17	TET7	tetraspanin-8 [Aegilops tauschii subsp. strangulata] [Aegilops tauschii]
TraesCS5B02G249700	34	21	32	186	138	119	0.91	0.54	0.76	4.55	3.79	3.26	0.736666666666667	3.86666666666667	2.3920065306235	1.68022228786312e-19	2.94345767320835e-17	RRT1	VAI33394.1 unnamed protein product [Triticum turgidum subsp. durum] [Triticum turgidum]
TraesCS2A02G193000	38	27	33	167	136	134	1.25	0.84	0.97	5.16	4.58	4.57	1.02	4.77	2.22542011403402	1.78464219062569e-19	3.1170507228567e-17	PUB1	VAH28625.1 unnamed protein product [Triticum turgidum subsp. durum] [Triticum turgidum]
TraesCS4A02G055900	56	75	45	263	232	173	3.52	4.45	2.53	15.51	14.92	11.28	3.5	13.9033333333333	1.99000398433574	1.85714601044597e-19	3.23885157130265e-17	--	VAH88105.1 unnamed protein product [Triticum turgidum subsp. durum] [Triticum turgidum]
TraesCS3D02G123410LC	5	2	3	112	91	67	0.13	0.05	0.07	2.77	2.45	1.83	0.0833333333333333	2.35	4.81762325751143	1.89432821014129e-19	3.29878088998741e-17	--	XP_020183713.1 protein ANTAGONIST OF LIKE HETEROCHROMATIN PROTEIN 1-like [Aegilops tauschii subsp. tauschii] [Aegilops tauschii]
TraesCS7D02G197300	16	10	18	114	109	92	0.53	0.31	0.53	3.54	3.69	3.15	0.456666666666667	3.46	2.92155864539735	2.03297794379591e-19	3.53496500652131e-17	2MMP	XP_020160940.1 metalloendoproteinase 2-MMP [Aegilops tauschii subsp. tauschii] [Aegilops tauschii]
TraesCS3B02G120600	255	255	274	585	560	454	6.84	6.47	6.58	14.77	15.4	12.64	6.63	14.27	1.10590455936318	2.05772777649866e-19	3.57269168933867e-17	MBR1	VAH73276.1 unnamed protein product [Triticum turgidum subsp. durum] [Triticum turgidum]
TraesCS6B02G334000	87	66	93	266	286	210	2.83	2.02	2.7	8.11	9.51	7.07	2.51666666666667	8.23	1.70937828693034	2.23622875506748e-19	3.87685868704454e-17	At3g28850	VAI60753.1 unnamed protein product [Triticum turgidum subsp. durum] [Triticum turgidum]
TraesCS1A02G168600	108	119	138	351	295	266	4.54	4.72	5.19	13.84	12.68	11.6	4.81666666666667	12.7066666666667	1.3994786265219	2.36272267909265e-19	4.09009664723047e-17	At2g23790	VAH04814.1 unnamed protein product [Triticum turgidum subsp. durum] [Triticum turgidum]
TraesCS2D02G227300	16	16	13	134	158	75	0.56	0.53	0.41	4.43	5.69	2.74	0.5	4.28666666666667	3.09985623683207	2.56166281136751e-19	4.42139978631046e-17	At5g17760	BAJ87784.1 predicted protein [Hordeum vulgare subsp. vulgare] [Hordeum vulgare]
TraesCS7A02G245100	195	157	217	565	411	394	12.55	9.54	12.5	34.15	27.1	26.28	11.53	29.1766666666667	1.3394225567581	2.90505969077811e-19	5.00671421405355e-17	SAP11	VAI73916.1 unnamed protein product [Triticum turgidum subsp. durum] [Triticum turgidum]
TraesCS4A02G223500	18	9	14	105	97	104	0.26	0.12	0.18	1.42	1.43	1.55	0.186666666666667	1.46666666666667	2.97400479146706	3.00828879265185e-19	5.17699957490742e-17	PIK-2	VAH93702.1 unnamed protein product [Triticum turgidum subsp. durum] [Triticum turgidum]
TraesCS2D02G566500	0	2	0	386	313	383	0	0.06	0	11.46	10.1	12.55	0.02	11.37	9.15101653889225	3.24470677632476e-19	5.57215055350759e-17	OST1B	SPT20948.1 unnamed protein product [Triticum aestivum]
TraesCS2B02G048200	518	523	530	205	203	215	41.39	39.47	37.9	15.38	16.62	17.84	39.5866666666667	16.6133333333333	-1.25267	3.24742926756693e-19	5.57215055350759e-17	CP12-2	VAH24822.1 unnamed protein product [Triticum turgidum subsp. durum] [Triticum turgidum]
TraesCS1B02G310300	642	642	534	216	216	235	27.06	25.53	20.14	8.54	9.32	10.27	24.2433333333333	9.37666666666667	-1.37044	3.3755066673325e-19	5.78343398571866e-17	EXPA4	AAW88315.1 expansin EXPA11 [Triticum aestivum]
TraesCS6B02G268700	5	6	5	110	91	62	0.12	0.13	0.1	2.39	2.14	1.49	0.116666666666667	2.00666666666667	4.10433665981473	3.45556414737384e-19	5.91194484874242e-17	ERF025	VAI59445.1 unnamed protein product [Triticum turgidum subsp. durum] [Triticum turgidum]
TraesCS3D02G258800	32	36	65	183	201	160	0.92	0.99	1.67	4.93	5.9	4.77	1.19333333333333	5.2	2.12351453648536	3.52956897936391e-19	6.02974045406019e-17	BC10	VAH62918.1 unnamed protein product [Triticum turgidum subsp. durum] [Triticum turgidum]
TraesCS4A02G405000	6	1	10	104	103	67	0.56	0.09	0.83	9.09	9.82	6.47	0.493333333333333	8.46	4.10002298821216	4.2383798122912e-19	7.23008283373092e-17	--	-
TraesCS5B02G408000	25	26	16	142	132	104	0.68	0.68	0.39	3.67	3.72	2.96	0.583333333333333	3.45	2.56420394055436	4.37750748200512e-19	7.45654556854736e-17	CYP74A1	VAI37149.1 unnamed protein product [Triticum turgidum subsp. durum] [Triticum turgidum]
TraesCS5D02G536500	370	335	333	800	707	589	11.12	9.49	8.95	22.57	21.73	18.32	9.85333333333333	20.8733333333333	1.08297723899252	4.97403274533358e-19	8.46033808029689e-17	At4g15970	XP_020198537.1 uncharacterized protein At4g15970-like [Aegilops tauschii subsp. tauschii] [Aegilops tauschii]
TraesCS1A02G084500	43	29	56	245	196	136	0.72	0.45	0.84	3.87	3.37	2.36	0.67	3.2	2.25583890442959	5.03552983577978e-19	8.5525075826215e-17	At3g05170	VAH02037.1 unnamed protein product [Triticum turgidum subsp. durum] [Triticum turgidum]
TraesCS7D02G350500	138	133	137	382	325	283	3.51	3.2	3.13	9.13	8.46	7.46	3.28	8.35	1.34808038274333	5.36492590607421e-19	9.09875883160313e-17	KCS11	XP_020191113.1 3-ketoacyl-CoA synthase 11-like [Aegilops tauschii subsp. tauschii] [Aegilops tauschii]
TraesCS5D02G328100	219	216	229	439	525	444	3.82	3.56	3.58	7.22	9.41	8.05	3.65333333333333	8.22666666666667	1.17109459618889	5.65627845418237e-19	9.57900169703805e-17	CLPD1	XP_020163680.1 chaperone protein ClpD1, chloroplastic-like [Aegilops tauschii subsp. tauschii] [Aegilops tauschii]
TraesCS3A02G325100	66	57	80	226	226	184	2.38	1.93	2.57	7.63	8.31	6.84	2.29333333333333	7.59333333333333	1.72728727700602	5.84242099729354e-19	9.87993916105902e-17	PER56	EMS61609.1 Peroxidase 56 [Triticum urartu]
TraesCS2B02G116900	31	31	37	140	136	138	0.77	0.74	0.83	3.28	3.48	3.57	0.78	3.44333333333333	2.14225981928165	5.94362293295649e-19	1.0036574933051e-16	EIL1A	VAH42013.1 unnamed protein product [Triticum turgidum subsp. durum] [Triticum turgidum]
TraesCS2A02G381100	65	53	76	190	284	211	1.37	1.05	1.43	3.76	6.12	4.61	1.28333333333333	4.83	1.91212724397467	6.1398389526434e-19	1.03529716702628e-16	PAL	VAH34541.1 unnamed protein product [Triticum turgidum subsp. durum] [Triticum turgidum]
TraesCS5A02G237900	54	60	67	213	193	170	1.81	1.9	2.02	6.71	6.64	5.92	1.91	6.42333333333333	1.74974952753882	6.22584558566636e-19	1.04828906780698e-16	HSFB1	VAI18330.1 unnamed protein product [Triticum turgidum subsp. durum] [Triticum turgidum]
TraesCS7D02G386600	7	9	6	96	80	78	0.09	0.11	0.08	1.2	1.09	1.07	0.0933333333333333	1.12	3.58496250072116	6.24622389207827e-19	1.05020921307296e-16	ABCG44	XP_020159781.1 ABC transporter G family member 44 [Aegilops tauschii subsp. tauschii] [Aegilops tauschii]
TraesCS3B02G130500	7	2	6	72	89	89	0.55	0.15	0.42	5.29	7.13	7.22	0.373333333333333	6.54666666666667	4.13222429225709	7.40853596405387e-19	1.24384748290604e-16	HSP18	CDM81637.1 unnamed protein product [Triticum aestivum]
TraesCS2B02G459100	1	5	3	63	95	116	0.04	0.19	0.11	2.36	3.89	4.8	0.113333333333333	3.68333333333333	5.02236781302846	7.92654314699258e-19	1.32700991723514e-16	AOX1B	QDQ70969.1 mitochondrial alternating oxidase 1d2 [Hordeum vulgare]
TraesCS2D02G303800	51	31	56	206	172	158	1.52	0.87	1.5	5.78	5.26	4.89	1.29666666666667	5.31	2.03390420653911	7.94129067128002e-19	1.32757959562076e-16	Tmem205	XP_020173888.1 embryonic protein DC-8 [Aegilops tauschii subsp. tauschii] [Aegilops tauschii]
TraesCS7B02G029200	158	141	140	384	354	306	5.04	4.26	4.01	11.53	11.59	10.15	4.43666666666667	11.09	1.32171129497097	8.14833665287029e-19	1.35976611350854e-16	At3g15890	VAI82999.1 unnamed protein product [Triticum turgidum subsp. durum] [Triticum turgidum]
TraesCS7D02G157300	12	6	15	96	88	98	0.71	0.34	0.79	5.34	5.33	6.01	0.613333333333333	5.56	3.18034161738765	8.15706287435694e-19	1.35976611350854e-16	ATL60	XP_020196033.1 RING-H2 finger protein ATL3-like [Aegilops tauschii subsp. tauschii] [Aegilops tauschii]
TraesCS7D02G044400	85	57	83	260	216	215	3.15	2	2.75	9.03	8.19	8.25	2.63333333333333	8.49	1.68887440120973	8.68801718849138e-19	1.44621500345895e-16	SNAP33	AFQ60149.1 SNAP34 [Triticum aestivum]
TraesCS5B02G385000	53	82	79	312	221	189	2.85	4.14	3.78	15.67	12.11	10.44	3.59	12.74	1.82730952843325	9.60886732407932e-19	1.59722851136138e-16	PRA1E	VAI36518.1 unnamed protein product [Triticum turgidum subsp. durum] [Triticum turgidum]
TraesCS6A02G168900	42	16	30	144	154	156	1.03	0.38	0.66	3.33	3.9	3.99	0.69	3.74	2.43837000310947	9.81417022142092e-19	1.62904089028527e-16	LYK5	VAI45082.1 unnamed protein product [Triticum turgidum subsp. durum] [Triticum turgidum]
TraesCS4B02G092200	4	6	15	70	107	115	0.17	0.24	0.57	2.75	4.6	5.01	0.326666666666667	4.12	3.65675318378916	1.12434718865499e-18	1.86100928869567e-16	CRK36	VAI02952.1 unnamed protein product [Triticum turgidum subsp. durum] [Triticum turgidum]
TraesCS2D02G248800	392	320	385	740	838	647	13.62	10.48	11.95	24.13	29.78	23.3	12.0166666666667	25.7366666666667	1.0987884535208	1.27293490248849e-18	2.10397440902553e-16	--	VAH30484.1 unnamed protein product [Triticum turgidum subsp. durum] [Triticum turgidum]
TraesCS1B02G305200	17	19	26	121	119	101	0.37	0.39	0.5	2.46	2.64	2.26	0.42	2.45333333333333	2.54628203255709	1.29578819660469e-18	2.13872674672883e-16	MDIS2	VAH20223.1 unnamed protein product [Triticum turgidum subsp. durum] [Triticum turgidum]
TraesCS7D02G165800	162	173	191	451	365	338	4.7	4.74	4.97	12.28	10.84	10.16	4.80333333333333	11.0933333333333	1.20758509796634	1.52008206923097e-18	2.49835735822397e-16	FAP2	XP_020193415.1 fatty-acid-binding protein 2-like [Aegilops tauschii subsp. tauschii] [Aegilops tauschii]
TraesCS1D02G368900	25	33	31	149	156	109	0.68	0.82	0.76	3.76	4.24	2.99	0.753333333333333	3.66333333333333	2.28179670853404	1.56632247460162e-18	2.57074598348991e-16	rutD	XP_020148610.1 uncharacterized protein LOC109733809 isoform X1 [Aegilops tauschii subsp. tauschii] [Aegilops tauschii]
TraesCS6D02G113500	0	4	8	101	103	61	0	0.23	0.44	5.82	6.47	3.88	0.223333333333333	5.39	4.59301477301589	1.65219658503189e-18	2.70789003884596e-16	--	XP_020149464.1 uncharacterized protein LOC109734675 [Aegilops tauschii subsp. tauschii] [Aegilops tauschii]
TraesCS5A02G551400LC	1	8	7	125	78	66	0.05	0.46	0.41	7.17	4.89	4.16	0.306666666666667	5.40666666666667	4.13999614816026	1.70149604723576e-18	2.78478979635836e-16	--	-
TraesCS6D02G157900	15	12	17	107	86	104	0.35	0.25	0.34	2.34	2.04	2.5	0.313333333333333	2.29333333333333	2.87167590302446	1.94195356189891e-18	3.17390069442086e-16	LYK5	XP_020150460.1 protein LYK5-like [Aegilops tauschii subsp. tauschii] [Aegilops tauschii]
TraesCS2B02G705600LC	16	11	14	103	116	82	0.32	0.21	0.25	1.94	2.38	1.7	0.26	2.00666666666667	2.94821745789746	2.04698443140429e-18	3.34089556669168e-16	--	XP_020191998.1 uncharacterized protein LOC109777850 [Aegilops tauschii subsp. tauschii] [Aegilops tauschii]
TraesCS2B02G367500	13	9	8	116	84	77	0.77	0.5	0.42	6.43	5.07	4.71	0.563333333333333	5.40333333333333	3.26178893923536	2.16954138666963e-18	3.53598986282526e-16	CML17	VAH49029.1 unnamed protein product [Triticum turgidum subsp. durum] [Triticum turgidum]
TraesCS2B02G216800	26	40	33	139	129	149	1.14	1.66	1.3	5.71	5.79	6.77	1.36666666666667	6.09	2.15578081912204	2.25111276977337e-18	3.66383475027009e-16	WNK5	VAH44350.1 unnamed protein product [Triticum turgidum subsp. durum] [Triticum turgidum]
TraesCS5A02G492000	158	163	191	403	423	326	3.39	3.3	3.67	8.13	9.3	7.25	3.45333333333333	8.22666666666667	1.25231839146287	2.41563938083712e-18	3.92615210589336e-16	CIPK9	XP_020186442.1 CBL-interacting protein kinase 9 [Aegilops tauschii subsp. tauschii] [Aegilops tauschii]
TraesCS7A02G267000	1	2	3	115	97	72	0.03	0.05	0.07	2.96	2.72	2.05	0.05	2.57666666666667	5.68743400831633	2.7149961999538e-18	4.40047486580324e-16	CPK21	VAI74581.1 unnamed protein product [Triticum turgidum subsp. durum] [Triticum turgidum]
TraesCS4A02G405500	49	33	45	173	223	139	4.3	2.73	3.53	14.25	20.02	12.64	3.52	15.6366666666667	2.15128566613753	2.83662625668998e-18	4.59125418824861e-16	--	-
TraesCS5A02G321300	409	346	446	689	869	819	7.15	5.71	6.98	11.31	15.56	14.85	6.61333333333333	13.9066666666667	1.07232713213289	2.84803249301971e-18	4.60334887290265e-16	CLPD1	VAI20303.1 unnamed protein product [Triticum turgidum subsp. durum] [Triticum turgidum]
TraesCS3A02G105700	2	7	2	101	83	64	0.06	0.17	0.05	2.44	2.19	1.72	0.0933333333333333	2.11666666666667	4.50325785960193	2.95797354359234e-18	4.77445489680362e-16	--	XP_020171720.1 uncharacterized protein LOC109757310 [Aegilops tauschii subsp. tauschii] [Aegilops tauschii]
TraesCS4B02G197800	64	58	52	185	245	178	2.58	2.21	1.88	7.03	10.1	7.43	2.22333333333333	8.18666666666667	1.8805518941856	3.02181569048361e-18	4.87078396324756e-16	MPK5	XP_020172366.1 mitogen-activated protein kinase 5 [Aegilops tauschii subsp. tauschii] [Aegilops tauschii]
TraesCS1A02G221900	202	206	193	430	433	385	7.85	7.39	6.54	15.62	17.2	15.41	7.26	16.0766666666667	1.14692685604499	3.03600624573654e-18	4.88692603698186e-16	DREB2B	VAH06423.1 unnamed protein product [Triticum turgidum subsp. durum] [Triticum turgidum]
TraesCS4D02G177500	40	47	35	232	150	136	1.68	1.87	1.32	9.19	6.46	5.95	1.62333333333333	7.2	2.14903763496849	3.076111010156e-18	4.9446794317373e-16	LEA17	XP_020198068.1 late embryogenesis abundant protein 1-like [Aegilops tauschii subsp. tauschii] [Aegilops tauschii]
TraesCS1A02G314300	194	149	250	524	452	411	9.02	6.54	10.41	22.89	21.52	19.81	8.65666666666667	21.4066666666667	1.30617665104736	3.31352145209285e-18	5.3189973575694e-16	ERF4	ABC65857.1 ethylene-responsive factor-like transcription factor ERFL2c [Triticum aestivum]
MSTRG.62627	88	114	108	273	321	239	1.6	1.97	1.76	4.58	5.85	4.42	1.77666666666667	4.95	1.47825549292895	3.35094587615144e-18	5.37170394957526e-16	--	uncharacterized protein LOC109776337 isoform X1 [Aegilops tauschii subsp. strangulata] [Aegilops tauschii]
TraesCS3D02G115800	19	12	21	155	96	93	1.18	0.7	1.17	9.05	6.11	6	1.01666666666667	7.05333333333333	2.79445847966377	3.78219143052234e-18	6.05471416665643e-16	--	XP_020201016.1 uncharacterized protein LOC109786863 [Aegilops tauschii subsp. tauschii] [Aegilops tauschii]
TraesCS3D02G300900LC	52	50	25	224	226	143	1.36	1.25	0.6	5.53	6.08	3.89	1.07	5.16666666666667	2.2716230130393	3.96066021310434e-18	6.33175381773082e-16	--	ONM40997.1 hypothetical protein ZEAMMB73_Zm00001d044372 [Zea mays]
TraesCS5B02G490600	4	5	6	68	96	75	0.25	0.29	0.33	3.98	6.13	4.85	0.29	4.98666666666667	4.10395096403891	4.02224609225813e-18	6.42143631934831e-16	--	VAI39052.1 unnamed protein product [Triticum turgidum subsp. durum] [Triticum turgidum]
TraesCS2B02G399200	109	115	145	312	272	284	4.58	4.58	5.46	12.27	11.71	12.4	4.87333333333333	12.1266666666667	1.31520223169905	4.16722400041804e-18	6.63478757791728e-16	MYB4	VAH49872.1 unnamed protein product [Triticum turgidum subsp. durum] [Triticum turgidum]
TraesCS5D02G217400	31	18	35	112	149	161	0.95	0.52	0.96	3.22	4.67	5.11	0.81	4.33333333333333	2.41948340431003	4.70768313330047e-18	7.47493209803376e-16	CYP92C6	XP_020154284.1 cytochrome P450 71A1-like [Aegilops tauschii subsp. tauschii] [Aegilops tauschii]
TraesCS2A02G152400	21	14	23	116	117	97	0.67	0.42	0.65	3.47	3.81	3.2	0.58	3.49333333333333	2.59047950568872	4.94097521552083e-18	7.8347263099008e-16	CYP709B2	VAH27607.1 unnamed protein product [Triticum turgidum subsp. durum] [Triticum turgidum]
TraesCS3B02G311400	39	35	50	139	189	157	2.53	2.14	2.9	8.46	12.54	10.54	2.52333333333333	10.5133333333333	2.05881745480478	5.01782929553814e-18	7.94582435483713e-16	--	CDM84008.1 unnamed protein product [Triticum aestivum]
TraesCS2A02G396400	15	5	8	99	91	80	0.4	0.13	0.19	2.49	2.5	2.22	0.24	2.40333333333333	3.32393044779851	5.52416701946936e-18	8.72400908167805e-16	ACS1	VAH34969.1 unnamed protein product [Triticum turgidum subsp. durum] [Triticum turgidum]
TraesCS2D02G099400	80	73	80	212	211	222	1.96	1.68	1.75	4.85	5.25	5.61	1.79666666666667	5.23666666666667	1.54332600254169	5.8833470897147e-18	9.27872025785166e-16	EIL2	SPT16276.1 unnamed protein product [Triticum aestivum]
TraesCS1B02G389700	1	2	1	120	127	100	0.06	0.11	0.05	6.44	7.43	5.95	0.0733333333333333	6.60666666666667	6.49330962854919	6.03968159330112e-18	9.51245786556236e-16	ERF109	AFP49820.1 ethylene responsive transcription factor 6 [Triticum turgidum subsp. durum] [Triticum turgidum]
TraesCS2A02G349100	6	13	4	97	112	65	0.33	0.68	0.2	5.03	6.34	3.72	0.403333333333333	5.03	3.64051385325209	6.36463863114718e-18	1.00107895415874e-15	CML17	VAH33644.1 unnamed protein product [Triticum turgidum subsp. durum] [Triticum turgidum]
TraesCS1D02G314800	162	146	178	394	376	314	7.57	6.44	7.44	17.28	17.98	15.21	7.15	16.8233333333333	1.23444843891152	6.46831780249967e-18	1.01602078642163e-15	ERF4	XP_020193348.1 ethylene-responsive transcription factor 8-like [Aegilops tauschii subsp. tauschii] [Aegilops tauschii]
TraesCS2A02G562400	16	26	29	104	124	137	0.58	0.89	0.94	3.56	4.62	5.17	0.803333333333333	4.45	2.46973469034496	6.67300807718124e-18	1.04676776301328e-15	AMI1	VAH39545.1 unnamed protein product [Triticum turgidum subsp. durum] [Triticum turgidum]
TraesCS7B02G351000	139	166	137	309	356	382	5.84	6.58	5.15	12.19	15.32	16.63	5.85666666666667	14.7133333333333	1.32897243827123	6.87107307071304e-18	1.07639452862247e-15	HSA32	VAI91697.1 unnamed protein product [Triticum turgidum subsp. durum] [Triticum turgidum]
TraesCS6A02G326900	64	54	49	251	169	170	1.67	1.33	1.14	6.11	4.49	4.58	1.38	5.06	1.87446911791614	7.58630543727268e-18	1.18685111615043e-15	CPR5	VAI49916.1 unnamed protein product [Triticum turgidum subsp. durum] [Triticum turgidum]
TraesCS1A02G255100	134	132	132	397	352	260	7.22	6.71	6.36	20.09	19.39	14.52	6.76333333333333	18	1.41219054218154	8.05850230275522e-18	1.25904146391592e-15	GID1	CBW30246.1 GID1 protein [Triticum aestivum]
TraesCS6B02G331000	184	188	231	460	393	377	5.66	5.46	6.36	13.28	12.37	12.02	5.82666666666667	12.5566666666667	1.1077108484468	8.32271154919298e-18	1.29858713454621e-15	RAP2-4	ABC74510.1 DRF-like transcription factor DRFL2a [Triticum aestivum]
TraesCS6D02G296100	41	42	47	199	158	130	1.53	1.48	1.57	6.97	6.03	5.03	1.52666666666667	6.01	1.97697989333539	8.77244210744119e-18	1.36693571277894e-15	PHI-1	XP_020171839.1 protein EXORDIUM-like [Aegilops tauschii subsp. tauschii] [Aegilops tauschii]
TraesCS7A02G057700	1	1	3	146	139	55	0.06	0.05	0.15	7.61	7.89	3.16	0.0866666666666667	6.22	6.16529355271067	8.81826545295567e-18	1.37224874978162e-15	DREB1C	AFR67797.1 AP2 domain CBF protein [Triticum aestivum]
TraesCS3D02G122010LC	3	3	5	69	82	77	0.08	0.07	0.11	1.62	2.1	1.99	0.0866666666666667	1.90333333333333	4.45690721722175	9.46757375304658e-18	1.4713338854303e-15	--	XP_020190980.1 protein ANTAGONIST OF LIKE HETEROCHROMATIN PROTEIN 1-like [Aegilops tauschii subsp. tauschii] [Aegilops tauschii]
TraesCS2D02G062100	113	89	137	339	337	246	1.37	1.02	1.49	3.86	4.18	3.09	1.29333333333333	3.71	1.52032503515484	9.5123247182762e-18	1.4763279352548e-15	CCR3	SPT15927.1 unnamed protein product [Triticum aestivum]
TraesCS5A02G212800	6	2	1	96	76	68	0.26	0.08	0.04	3.87	3.34	3.02	0.126666666666667	3.41	4.75066291630174	1.06520500397974e-17	1.65102543014195e-15	TIFY10C	KAE8784626.1 protein TIFY 10A [Hordeum vulgare]
TraesCS3D02G269800	194	161	183	408	402	354	5.15	4.02	4.35	10.14	10.9	9.72	4.50666666666667	10.2533333333333	1.18596035167964	1.1370084667168e-17	1.75998683587477e-15	IRX9L	XP_020180467.1 probable glucuronosyltransferase Os01g0675500 [Aegilops tauschii subsp. tauschii] [Aegilops tauschii]
TraesCS5A02G403200	8	13	19	127	79	92	0.24	0.36	0.48	3.4	2.3	2.73	0.36	2.81	2.96450131877861	1.13920057555133e-17	1.7610505911779e-15	CYP74A1	VAI22348.1 unnamed protein product [Triticum turgidum subsp. durum] [Triticum turgidum]
TraesCS7B02G582600LC	2	3	8	64	114	73	0.14	0.2	0.51	4.31	8.37	5.43	0.283333333333333	6.03666666666667	4.41317989481247	1.16470362868976e-17	1.79809957831838e-15	--	BAJ88689.1 predicted protein, partial [Hordeum vulgare subsp. vulgare] [Hordeum vulgare]
TraesCS2D02G275000	11	1	7	90	98	69	0.29	0.02	0.16	2.22	2.64	1.88	0.156666666666667	2.24666666666667	3.84201592950422	1.17702357007612e-17	1.81472532565808e-15	EXO70B1	XP_020196674.1 exocyst complex component EXO70A1-like [Aegilops tauschii subsp. tauschii] [Aegilops tauschii]
TraesCS4B02G343500	7	9	5	67	86	90	0.16	0.2	0.1	1.47	2.05	2.17	0.153333333333333	1.89666666666667	3.62872288624957	1.18141027151954e-17	1.8190920104442e-15	--	VAI10700.1 unnamed protein product [Triticum turgidum subsp. durum] [Triticum turgidum]
TraesCS7A02G204200	103	71	77	239	262	235	2.78	1.8	1.85	6.05	7.23	6.55	2.14333333333333	6.61	1.6247940349009	1.19375462269635e-17	1.83568401389188e-15	--	VAI72771.1 unnamed protein product [Triticum turgidum subsp. durum] [Triticum turgidum]
TraesCS7A02G364800	5	3	6	100	66	67	0.35	0.2	0.38	6.6	4.75	4.88	0.31	5.41	4.12528847343994	1.28659637217897e-17	1.97585407697017e-15	--	-
TraesCS6B02G387700	36	41	46	192	136	136	1.19	1.28	1.34	5.9	4.55	4.6	1.27	5.01666666666667	1.98190058415374	1.41000112500992e-17	2.15687779935831e-15	--	VAI62109.1 unnamed protein product [Triticum turgidum subsp. durum] [Triticum turgidum]
TraesCS1D02G259400	61	77	84	204	222	201	1.37	1.61	1.67	4.27	5.07	4.65	1.55	4.66333333333333	1.58909334116936	1.42909385210619e-17	2.18152847827018e-15	At5g48380	XP_020193516.1 probably inactive leucine-rich repeat receptor-like protein kinase At5g48380 [Aegilops tauschii subsp. tauschii] [Aegilops tauschii]
TraesCSU02G116400	21	25	24	86	186	148	0.47	0.53	0.48	1.81	4.26	3.43	0.493333333333333	3.16666666666667	2.68233033758936	1.42984425392937e-17	2.18152847827018e-15	HSP1	XP_020177409.1 heat shock 70 kDa protein, mitochondrial-like [Aegilops tauschii subsp. tauschii] [Aegilops tauschii]
TraesCS6A02G351300	146	108	124	319	325	290	2.95	2.06	2.25	6.06	6.74	6.08	2.42	6.29333333333333	1.37881731136609	1.44504704663375e-17	2.20185280587467e-15	TPS11	XP_020195026.1 probable alpha,alpha-trehalose-phosphate synthase [UDP-forming] 11 [Aegilops tauschii subsp. tauschii] [Aegilops tauschii]
TraesCS5D02G410700	2	1	10	95	109	57	0.09	0.04	0.4	4.04	5.05	2.67	0.176666666666667	3.92	4.47175189027316	1.53352138614391e-17	2.33362470285219e-15	--	XP_020170850.1 uncharacterized protein LOC109756421 [Aegilops tauschii subsp. tauschii] [Aegilops tauschii]
TraesCS6A02G094400	75	71	69	177	249	251	2.46	2.2	2.03	5.46	8.37	8.54	2.23	7.45666666666667	1.74148714041766	1.64330370382441e-17	2.49743748089533e-15	WHAB1.6	VAI43083.1 unnamed protein product [Triticum turgidum subsp. durum] [Triticum turgidum]
TraesCS4D02G021200	212	219	238	438	444	409	8.81	8.59	8.85	17.09	18.88	17.61	8.75	17.86	1.02937715840153	1.82952879220805e-17	2.77684978368055e-15	rnf-5	XP_020149648.1 E3 ubiquitin-protein ligase RNF5-like [Aegilops tauschii subsp. tauschii] [Aegilops tauschii]
TraesCS6B02G292100	63	94	100	317	219	217	1.8	2.52	2.55	8.49	6.39	6.42	2.29	7.1	1.6324714262951	1.88044226911352e-17	2.85042895357775e-15	--	VAI59624.1 unnamed protein product [Triticum turgidum subsp. durum] [Triticum turgidum]
TraesCS1B02G196400	63	48	54	216	223	147	2.49	1.79	1.91	8.03	9.04	6.01	2.06333333333333	7.69333333333333	1.89863190943122	1.91669227695504e-17	2.90161919319318e-15	PP2A13	VAH17104.1 unnamed protein product [Triticum turgidum subsp. durum] [Triticum turgidum]
TraesCS2A02G164600	227	211	270	515	498	413	10.88	9.52	11.58	23.14	24.42	20.49	10.66	22.6833333333333	1.08942522291102	1.96512859674947e-17	2.97110179132838e-15	GEM	XP_020175541.1 GEM-like protein 1 [Aegilops tauschii subsp. tauschii] [Aegilops tauschii]
TraesCS7A02G176400	4	3	1	79	77	75	0.28	0.2	0.06	5.14	5.46	5.38	0.18	5.32666666666667	4.88716419076451	2.29189128205231e-17	3.46066711752678e-15	--	VAI72066.1 unnamed protein product [Triticum turgidum subsp. durum] [Triticum turgidum]
TraesCS2D02G148700	118	122	106	280	286	267	2.87	2.81	2.32	6.4	7.14	6.73	2.66666666666667	6.75666666666667	1.34127418369217	2.32111623850349e-17	3.50027918121334e-15	MED26B	XP_020167084.1 probable mediator of RNA polymerase II transcription subunit 26b [Aegilops tauschii subsp. tauschii] [Aegilops tauschii]
TraesCS6B02G197000	23	7	31	156	137	102	0.55	0.16	0.68	3.55	3.39	2.57	0.463333333333333	3.17	2.77436045813706	2.33240817277294e-17	3.51278081331062e-15	LYK5	VAI56665.1 unnamed protein product [Triticum turgidum subsp. durum] [Triticum turgidum]
TraesCS2A02G163800	141	146	133	317	304	312	5.1	4.81	5	9.91	11.96	11.16	4.97	11.01	1.14749671200208	2.44392466627536e-17	3.67600195754339e-15	SAPK2	VAH27884.1 unnamed protein product [Triticum turgidum subsp. durum] [Triticum turgidum]
TraesCS7D02G201000	85	82	139	268	297	266	2.26	2.06	3.3	6.71	8.08	7.33	2.54	7.37333333333333	1.53748848274138	2.47538481654839e-17	3.71854277281291e-15	GLU10	XP_020150705.1 endoglucanase 16-like [Aegilops tauschii subsp. tauschii] [Aegilops tauschii]
TraesCS4D02G056900	13	7	15	113	99	70	0.29	0.15	0.3	2.41	2.28	1.65	0.246666666666667	2.11333333333333	3.09888566451045	2.67781722277117e-17	4.01748111593753e-15	BHLH25	VAI01918.1 unnamed protein product [Triticum turgidum subsp. durum] [Triticum turgidum]
TraesCS5B02G154200	31	44	57	185	156	141	1.85	2.48	3.05	10.39	9.55	8.74	2.46	9.56	1.95835230264151	2.83578243974122e-17	4.24902602641993e-15	RPS10	VAI30495.1 unnamed protein product [Triticum turgidum subsp. durum] [Triticum turgidum]
TraesCS3B02G125600	42	39	40	211	156	120	1.14	1	0.97	5.38	4.33	3.38	1.03666666666667	4.36333333333333	2.07347861181463	3.10189987754326e-17	4.64182260191646e-15	Os01g0192000	CDM81668.1 unnamed protein product [Triticum aestivum]
TraesCS3A02G421700	110	88	124	282	242	277	5.89	4.55	5.96	15.52	14.63	16.72	5.46666666666667	15.6233333333333	1.51496897997357	3.26582161857393e-17	4.88088093804289e-15	RABC1	KAE8776852.1 ras-related protein RABC1 [Hordeum vulgare]
TraesCS4B02G140200	164	137	123	307	368	438	5.33	4.16	3.56	9.31	12.05	14.53	4.35	11.9633333333333	1.45953211635883	3.36052990587249e-17	5.0160195235333e-15	RCAB	VAI04466.1 unnamed protein product [Triticum turgidum subsp. durum] [Triticum turgidum]
TraesCS5B02G209100	3	4	6	65	78	77	0.09	0.11	0.16	1.81	2.37	2.37	0.12	2.18333333333333	4.1854260949825	3.38203749007216e-17	5.04169160717483e-15	CYP92C6	VAI32445.1 unnamed protein product [Triticum turgidum subsp. durum] [Triticum turgidum]
TraesCS5B02G544900LC	385	350	314	1016	814	586	19.86	17.04	14.49	49.2	42.97	31.31	17.13	41.16	1.26471783080997	3.4863352506159e-17	5.19055882566888e-15	WZCI	XP_020168539.1 serpin-Z1B [Aegilops tauschii subsp. tauschii] [Aegilops tauschii]
TraesCS5A02G185600	9	5	5	80	83	67	0.35	0.19	0.18	2.96	3.35	2.74	0.24	3.01666666666667	3.65184898052826	3.6917680906849e-17	5.48942929489363e-15	WRKY41	VAI17514.1 unnamed protein product [Triticum turgidum subsp. durum] [Triticum turgidum]
TraesCS5B02G132500	0	1	2	160	191	96	0	0.02	0.04	3.17	4.13	2.1	0.02	3.13333333333333	7.29155444584384	3.70100945719262e-17	5.49618691243141e-15	--	VAI29851.1 unnamed protein product [Triticum turgidum subsp. durum] [Triticum turgidum]
TraesCS5B02G366100	11	13	11	108	84	74	0.47	0.53	0.42	4.36	3.7	3.3	0.473333333333333	3.78666666666667	3	3.72013705543425e-17	5.51759034855547e-15	OsI_33147	XP_020196852.1 CASP-like protein 5A3 [Aegilops tauschii subsp. tauschii] [Aegilops tauschii]
TraesCS4B02G213400	130	96	148	319	294	294	5.46	3.82	5.56	12.6	12.64	12.83	4.94666666666667	12.69	1.35916347794146	3.79783639381142e-17	5.62570139843798e-15	SR45A	VAI07424.1 unnamed protein product [Triticum turgidum subsp. durum] [Triticum turgidum]
TraesCSU02G072800	3	3	5	73	90	61	0.08	0.08	0.12	1.85	2.49	1.71	0.0933333333333333	2.01666666666667	4.43343641010436	3.9632723525068e-17	5.86333827098674e-15	PLP3	XP_020201003.1 patatin-like protein 3 [Aegilops tauschii subsp. tauschii] [Aegilops tauschii]
TraesCS4B02G304600	50	49	72	210	199	152	4.18	3.86	5.38	16.47	17.01	13.16	4.47333333333333	15.5466666666667	1.79718311700032	4.00084348046129e-17	5.90399376759824e-15	--	-
TraesCS3B02G288100	4	0	0	112	115	90	0.15	0	0	3.92	4.39	3.48	0.05	3.93	6.29645740737124	4.38997355123169e-17	6.47006907949918e-15	MAPKKK17	XP_020173830.1 mitogen-activated protein kinase kinase kinase 3-like [Aegilops tauschii subsp. tauschii] [Aegilops tauschii]
TraesCS2A02G029800	154	178	211	404	381	341	2.64	2.88	3.23	6.51	6.69	6.06	2.91666666666667	6.42	1.13825278112377	4.48154166437702e-17	6.59671658677645e-15	RGA1	VAH24777.1 unnamed protein product [Triticum turgidum subsp. durum] [Triticum turgidum]
TraesCS2D02G142400	2	4	5	75	79	64	0.06	0.12	0.15	2.27	2.64	2.15	0.11	2.35333333333333	4.41913025391272	4.7985253460366e-17	7.05443508849114e-15	GATL4	XP_020188742.1 probable galacturonosyltransferase-like 4 [Aegilops tauschii subsp. tauschii] [Aegilops tauschii]
TraesCS1A02G296300	38	24	39	154	134	125	0.78	0.47	0.71	2.97	2.82	2.66	0.653333333333333	2.81666666666667	2.10809768705434	5.45209981411655e-17	7.99518326375373e-15	MDIS2	VAH08401.1 unnamed protein product [Triticum turgidum subsp. durum] [Triticum turgidum]
TraesCS7B02G171000	9	17	24	138	155	71	0.45	0.8	1.06	6.42	7.86	3.65	0.77	5.97666666666667	2.95641073145232	5.54287568442949e-17	8.1181276388399e-15	NIP2	VAI86898.1 unnamed protein product [Triticum turgidum subsp. durum] [Triticum turgidum]
TraesCS6A02G301900	94	111	110	262	259	236	3.14	3.5	3.29	8.21	8.85	8.16	3.31	8.40666666666667	1.34470265279985	5.83255511735972e-17	8.53171581179587e-15	RAP2-4	ABC74511.1 DRF-like transcription factor DRFL2c [Triticum aestivum]
TraesCS5D02G154300	21	32	25	128	120	107	0.78	1.12	0.83	4.45	4.55	4.11	0.91	4.37	2.2636948293019	6.11167505768017e-17	8.92884442696441e-15	HMGCL	XP_020170594.1 hydroxymethylglutaryl-CoA lyase, mitochondrial-like [Aegilops tauschii subsp. tauschii] [Aegilops tauschii]
TraesCS6D02G294800	5	2	5	85	94	52	0.18	0.07	0.16	2.84	3.42	1.92	0.136666666666667	2.72666666666667	4.31840502832366	6.53426090805383e-17	9.53431770551465e-15	ATL31	XP_020146819.1 E3 ubiquitin-protein ligase ATL31-like [Aegilops tauschii subsp. tauschii] [Aegilops tauschii]
TraesCS4A02G091300	208	195	221	407	385	429	7.86	6.97	7.51	14.47	14.96	16.84	7.44666666666667	15.4233333333333	1.05044791308198	6.74763634818858e-17	9.83339851479108e-15	SR45A	VAH89137.1 unnamed protein product [Triticum turgidum subsp. durum] [Triticum turgidum]
TraesCS3D02G590100LC	5	0	4	90	116	49	0.31	0	0.21	4.93	6.96	2.97	0.173333333333333	4.95333333333333	4.83677868239751	6.8275446655947e-17	9.93747427683114e-15	--	-
TraesCS5B02G098900	14	17	14	84	91	109	0.33	0.39	0.31	1.92	2.26	2.73	0.343333333333333	2.30333333333333	2.74604137320504	7.32072603514158e-17	1.06420621376936e-14	CBP60B	VAI28593.1 unnamed protein product [Triticum turgidum subsp. durum] [Triticum turgidum]
TraesCSU02G009400	9	1	5	77	95	63	0.47	0.05	0.23	3.74	5.03	3.38	0.25	4.05	4.01792190799726	7.6947311039716e-17	1.11718712561906e-14	CRK45	VAH40275.1 unnamed protein product [Triticum turgidum subsp. durum] [Triticum turgidum]
TraesCS1D02G083900	224	233	286	569	628	417	16.42	16.12	18.76	39.17	47.12	31.68	17.1	39.3233333333333	1.20138929513399	8.02908366333462e-17	1.16284582729052e-14	LTI6B	XP_003568974.1 hydrophobic protein LTI6B [Brachypodium distachyon]
TraesCS2D02G541000	57	61	89	182	209	231	0.84	0.85	1.18	2.53	3.17	3.55	0.956666666666667	3.08333333333333	1.68840262872798	8.123414513744e-17	1.17499231233602e-14	RGA4	SPT20707.1 unnamed protein product [Triticum aestivum]
TraesCS7A02G488600	12	3	11	88	105	68	0.49	0.12	0.4	3.4	4.42	2.9	0.336666666666667	3.57333333333333	3.40787770770597	8.13303287409359e-17	1.17499231233602e-14	RISBZ5	VAI80442.1 unnamed protein product [Triticum turgidum subsp. durum] [Triticum turgidum]
TraesCS2A02G468200	609	645	606	288	271	224	17.19	17.2	15.31	7.63	7.84	6.56	16.5666666666667	7.34333333333333	-1.17378	8.62394811448831e-17	1.24437935419686e-14	AS1	ABK62802.1 polyphenol oxidase [Triticum aestivum]
TraesCS3B02G238500	4	0	6	67	71	84	0.14	0	0.19	2.23	2.57	3.08	0.11	2.62666666666667	4.57765770009792	8.68482705534545e-17	1.251620482353e-14	IQM1	CDM83231.1 unnamed protein product [Triticum aestivum]
TraesCS3B02G542100LC	103	85	92	286	256	208	6.39	4.98	5.11	16.67	16.27	13.38	5.49333333333333	15.44	1.49091901080602	9.15505662758271e-17	1.316146236699e-14	--	RWV80712.1 hypothetical protein GW17_00057966 [Ensete ventricosum]
TraesCS3D02G348800	102	133	142	357	267	271	0.9	1.11	1.12	2.96	2.42	2.48	1.04333333333333	2.62	1.32836665532599	9.36701290639797e-17	1.34496513415031e-14	NPR4	XP_020195781.1 ankyrin repeat-containing protein NPR4 [Aegilops tauschii subsp. tauschii] [Aegilops tauschii]
TraesCS4A02G298400	23	17	15	116	108	88	0.76	0.53	0.44	3.58	3.64	3	0.576666666666667	3.40666666666667	2.5625512533009	9.4207623651199e-17	1.35102506555277e-14	CCX1	CDM83454.1 unnamed protein product [Triticum aestivum]
TraesCS6B02G324000	163	174	186	414	383	312	3.9	3.91	3.98	9.28	9.37	7.72	3.93	8.79	1.1613338528848	1.08351770888042e-16	1.55196339447497e-14	PUB11	VAI60525.1 unnamed protein product [Triticum turgidum subsp. durum] [Triticum turgidum]
TraesCS6D02G258100	54	58	77	197	189	170	1.15	1.16	1.46	3.93	4.11	3.74	1.25666666666667	3.92666666666667	1.64370311056179	1.12563584371259e-16	1.61031977631949e-14	GALS1	XP_020193764.1 galactan beta-1,4-galactosyltransferase GALS1-like [Aegilops tauschii subsp. tauschii] [Aegilops tauschii]
TraesCS1D02G299700	461	404	431	168	153	172	35.2	29.12	29.47	12.08	11.94	13.66	31.2633333333333	12.56	-1.31564	1.17205804661038e-16	1.67264117963951e-14	EXPA4	XP_020194184.1 expansin-A4 [Aegilops tauschii subsp. tauschii] [Aegilops tauschii]
TraesCS7A02G508800	0	0	0	146	161	172	0	0	0	6.09	7.32	7.92	0.001	7.11	12.7956338445068	1.18045762053235e-16	1.68257626881774e-14	WRKY28	VAI80864.1 unnamed protein product [Triticum turgidum subsp. durum] [Triticum turgidum]
TraesCS2A02G565600	38	20	21	113	133	147	0.98	0.49	0.49	2.75	3.52	3.93	0.653333333333333	3.4	2.37964359274365	1.36534002000086e-16	1.93901480364733e-14	NPF5.10	SPT21023.1 unnamed protein product [Triticum aestivum]
TraesCS7A02G180900	14	14	12	122	95	68	0.38	0.36	0.29	3.12	2.67	1.93	0.343333333333333	2.57333333333333	2.90595651008486	1.38402509470452e-16	1.9631682985759e-14	RAP2-4	VAI72148.1 unnamed protein product [Triticum turgidum subsp. durum] [Triticum turgidum]
TraesCS4D02G214100	193	188	229	405	373	407	7.87	7.03	8.06	15.13	15.2	17.38	7.65333333333333	15.9033333333333	1.05516904430861	1.38698630079373e-16	1.96498681466687e-14	SR45A	VAH89138.1 unnamed protein product [Triticum turgidum subsp. durum] [Triticum turgidum]
TraesCS2A02G315100	142	111	99	328	316	268	3.08	2.27	1.89	6.57	6.96	6.03	2.41333333333333	6.52	1.43384476786903	1.4781478028848e-16	2.0890798573573e-14	Os04g0447100	QBG67103.1 lipoxygenase-like protein [Triticum aestivum]
TraesCS3B02G124200	23	26	35	146	110	110	0.6	0.64	0.81	3.58	2.94	2.98	0.683333333333333	3.16666666666667	2.21230360371287	1.48849120364926e-16	2.10116064696554e-14	--	XP_020171720.1 uncharacterized protein LOC109757310 [Aegilops tauschii subsp. tauschii] [Aegilops tauschii]
TraesCS3A02G315800	16	16	26	111	96	99	0.46	0.45	0.68	3.05	2.87	3.02	0.53	2.98	2.49124806589896	1.5348151877407e-16	2.16394148072039e-14	DGK5	EMS65813.1 Diacylglycerol kinase iota [Triticum urartu]
TraesCS7A02G528000	11	7	12	130	102	54	0.38	0.23	0.37	4.2	3.6	1.91	0.326666666666667	3.23666666666667	3.30861764130398	1.61298089043425e-16	2.27141094777855e-14	ASPG1	XP_020160808.1 aspartic proteinase nepenthesin-2-like [Aegilops tauschii subsp. tauschii] [Aegilops tauschii]
TraesCS3D02G139300	83	85	115	269	221	225	2.2	2.13	2.73	6.7	6.01	6.19	2.35333333333333	6.3	1.42064614583726	1.67126143860262e-16	2.35065331812687e-14	BZR2	CDM82126.1 unnamed protein product [Triticum aestivum]
TraesCS2B02G474600	3	6	5	74	70	65	0.09	0.16	0.13	2.02	2.08	1.96	0.126666666666667	2.02	3.99524647002936	1.69753819785584e-16	2.38474567814509e-14	FER	VAH51754.1 unnamed protein product [Triticum turgidum subsp. durum] [Triticum turgidum]
TraesCS7B02G150000	5	2	4	77	66	66	0.22	0.08	0.16	3.18	2.97	3.01	0.153333333333333	3.05333333333333	4.31564183203993	1.70503407058374e-16	2.39240404086151e-14	ATL16	VAI86264.1 unnamed protein product [Triticum turgidum subsp. durum] [Triticum turgidum]
TraesCS1D02G223600	178	178	180	375	414	336	6.92	6.56	6.2	13.88	16.69	13.68	6.56	14.75	1.16894723451848	1.714921933047e-16	2.40339634070691e-14	DREB2B	XP_020156297.1 dehydration-responsive element-binding protein 2B-like isoform X1 [Aegilops tauschii subsp. tauschii] [Aegilops tauschii]
TraesCS5A02G374000	21	21	31	116	110	108	0.68	0.64	0.9	3.53	3.66	3.61	0.74	3.6	2.28239973070073	1.7655028169997e-16	2.4713238116141e-14	NCED3	AOE46767.1 9-cis-epoxycarotenoid dioxygenase 2A [Triticum aestivum]
TraesCS7D02G440200	144	137	144	295	314	317	6.23	5.59	5.57	11.98	13.91	14.2	5.79666666666667	13.3633333333333	1.20498448484418	1.77910293122561e-16	2.48441746083393e-14	HSA32	XP_020157434.1 protein HEAT-STRESS-ASSOCIATED 32 [Aegilops tauschii subsp. tauschii] [Aegilops tauschii]
TraesCS3B02G392600	29	28	43	126	148	125	0.53	0.48	0.72	2.18	2.8	2.4	0.576666666666667	2.46	2.09284877842367	2.00389339622175e-16	2.79498942804125e-14	SCL14	VAH81673.1 unnamed protein product [Triticum turgidum subsp. durum] [Triticum turgidum]
TraesCS3A02G255700	2	3	4	75	72	62	0.08	0.1	0.12	2.39	2.49	2.16	0.1	2.34666666666667	4.55254102302878	2.48119088522209e-16	3.44838384525486e-14	MAPKKK17	XP_020173831.1 mitogen-activated protein kinase kinase kinase NPK1-like [Aegilops tauschii subsp. tauschii] [Aegilops tauschii]
TraesCS5D02G389300	7	2	19	93	93	84	0.44	0.14	1.09	5.58	6.11	5.58	0.556666666666667	5.75666666666667	3.37034807505487	2.60383018582167e-16	3.61453637016873e-14	--	XP_020196800.1 uncharacterized protein LOC109782595 [Aegilops tauschii subsp. tauschii] [Aegilops tauschii]
TraesCS4D02G282400	12	6	15	100	83	73	0.42	0.18	0.47	3.24	2.95	2.61	0.356666666666667	2.93333333333333	3.03989272712351	2.75561039821576e-16	3.82069952630337e-14	--	XP_020148198.1 embryonic protein DC-8-like [Aegilops tauschii subsp. tauschii] [Aegilops tauschii]
TraesCS5B02G406300	135	119	151	312	277	299	3.71	3.09	3.72	8.05	7.79	8.52	3.50666666666667	8.12	1.21137942861403	2.76434669876037e-16	3.8282766790809e-14	NHO1	VAI37114.1 unnamed protein product [Triticum turgidum subsp. durum] [Triticum turgidum]
TraesCSU02G028500	54	33	42	173	154	141	3.16	1.82	2.2	9.52	9.24	8.56	2.39333333333333	9.10666666666667	1.92790173446704	2.78630878144128e-16	3.85413033359127e-14	--	XP_020182717.1 uncharacterized protein LOC109768405 [Aegilops tauschii subsp. tauschii] [Aegilops tauschii]
TraesCS1D02G163800	3	11	6	81	72	70	0.08	0.27	0.14	1.96	1.9	1.87	0.163333333333333	1.91	3.5476814846417	2.80421377482902e-16	3.87184473565128e-14	--	XP_020162307.1 low-temperature-induced 65 kDa protein-like isoform X1 [Aegilops tauschii subsp. tauschii] [Aegilops tauschii]
TraesCS3B02G297800	61	38	77	258	199	162	5.02	2.97	5.7	20.03	16.86	13.9	4.56333333333333	16.93	1.8914220273589	2.80573254245551e-16	3.87184473565128e-14	--	CDM83898.1 unnamed protein product [Triticum aestivum]
TraesCS2B02G592700	197	212	201	458	353	396	9.34	9.48	8.53	20.39	17.13	19.43	9.11666666666667	18.9833333333333	1.05815500891555	3.10661565788811e-16	4.27696914726332e-14	DOF5.8	VAH54379.1 unnamed protein product [Triticum turgidum subsp. durum] [Triticum turgidum]
TraesCS5B02G474500	161	175	178	350	382	327	3.83	3.93	3.79	7.81	9.29	8.07	3.85	8.39	1.12381236485756	3.13800671550146e-16	4.3151095400871e-14	CPK8	VAI38729.1 unnamed protein product [Triticum turgidum subsp. durum] [Triticum turgidum]
TraesCS2B02G598800	114	110	103	270	300	236	1.72	1.56	1.39	3.82	4.62	3.68	1.55666666666667	4.04	1.37589524376329	3.18168052278359e-16	4.37003072930964e-14	pabp-1	VAH54531.1 unnamed protein product [Triticum turgidum subsp. durum] [Triticum turgidum]
TraesCSU02G075000	13	7	21	81	116	93	0.87	0.44	1.25	5.07	7.91	6.42	0.853333333333333	6.46666666666667	2.92184093707449	3.21205956817773e-16	4.4065842296283e-14	ZAT5	VAI39054.1 unnamed protein product [Triticum turgidum subsp. durum] [Triticum turgidum]
TraesCS3D02G264600	27	26	21	122	127	96	2.82	2.53	1.94	11.85	13.4	10.26	2.43	11.8366666666667	2.28423464069404	3.30935714668465e-16	4.52944552069393e-14	--	XP_020164127.1 uncharacterized protein LOC109749590 [Aegilops tauschii subsp. tauschii] [Aegilops tauschii]
TraesCS4B02G340200LC	31	44	34	204	191	99	1.69	2.25	1.66	10.37	10.59	5.55	1.86666666666667	8.83666666666667	2.24303793792229	3.31952040826074e-16	4.53804809831178e-14	--	-
TraesCS7B02G301100	6	5	9	67	95	64	0.12	0.09	0.16	1.25	1.93	1.31	0.123333333333333	1.49666666666667	3.6011182691122	3.39418217004854e-16	4.63470228592089e-14	LECRK3	VAI90651.1 unnamed protein product [Triticum turgidum subsp. durum] [Triticum turgidum]
TraesCS4B02G319900	168	211	204	445	383	347	5.08	6.02	5.52	12.62	11.85	10.88	5.54	11.7833333333333	1.08878983292641	3.6592205891836e-16	4.99078451966717e-14	CIPK9	AOO86830.1 CBL-interacting protein kinase 9 [Triticum aestivum]
TraesCS2A02G139600	5	3	5	93	57	62	0.13	0.08	0.12	2.34	1.56	1.72	0.11	1.87333333333333	4.09003220086247	4.09681755803606e-16	5.58111506724675e-14	GATL4	XP_020188742.1 probable galacturonosyltransferase-like 4 [Aegilops tauschii subsp. tauschii] [Aegilops tauschii]
TraesCS4D02G226000	8	12	5	60	111	83	0.43	0.6	0.24	3	6.06	4.59	0.423333333333333	4.55	3.42600054903505	4.30045066879232e-16	5.85171323445832e-14	HSP21	XP_020162288.1 small heat shock protein, chloroplastic-like [Aegilops tauschii subsp. tauschii] [Aegilops tauschii]
TraesCS6B02G276300	65	64	91	289	314	157	1.95	1.81	2.44	8.13	9.63	4.88	2.06666666666667	7.54666666666667	1.86853383755764	4.53477897279451e-16	6.16340191584622e-14	TPP1	VAI59249.1 unnamed protein product [Triticum turgidum subsp. durum] [Triticum turgidum]
TraesCS1B02G345400	28	30	26	138	132	96	0.57	0.58	0.47	2.64	2.75	2.03	0.54	2.47333333333333	2.19542537373618	4.7687050525493e-16	6.46631984541627e-14	CSLC7	VAH21092.1 unnamed protein product [Triticum turgidum subsp. durum] [Triticum turgidum]
TraesCS3A02G342600	18	9	15	92	105	79	0.58	0.27	0.44	2.82	3.52	2.66	0.43	3	2.80255393579378	5.03979826414973e-16	6.8260100980015e-14	--	VAH65416.1 unnamed protein product [Triticum turgidum subsp. durum] [Triticum turgidum]
TraesCS3B02G126400	15	14	23	95	116	85	0.41	0.35	0.54	2.37	3.14	2.33	0.433333333333333	2.61333333333333	2.59234203108675	5.06158023636917e-16	6.8475866175768e-14	PFK3	VAH73448.1 unnamed protein product [Triticum turgidum subsp. durum] [Triticum turgidum]
TraesCS3D02G658400LC	17	23	30	125	89	119	1.21	1.54	1.91	8.34	6.47	8.76	1.55333333333333	7.85666666666667	2.33854989859589	5.5395173028923e-16	7.47687882144248e-14	Os05g0128200	XP_020189456.1 zinc finger CCCH domain-containing protein 33-like [Aegilops tauschii subsp. tauschii] [Aegilops tauschii]
TraesCS1B02G210400	61	64	89	233	225	166	0.98	0.97	1.28	3.53	3.71	2.77	1.07666666666667	3.33666666666667	1.63183590414207	5.75944266413174e-16	7.76476381845651e-14	JMJ706	VAH17545.1 unnamed protein product [Triticum turgidum subsp. durum] [Triticum turgidum]
TraesCS1A02G300000	54	33	53	154	178	155	1.3	0.75	1.14	3.47	4.38	3.84	1.06333333333333	3.89666666666667	1.87364660076679	5.80372572516547e-16	7.81546135569982e-14	PUB16	XP_020198858.1 U-box domain-containing protein 16-like [Aegilops tauschii subsp. tauschii] [Aegilops tauschii]
TraesCS5B02G264700	8	13	11	90	84	68	0.23	0.35	0.28	2.42	2.44	2.02	0.286666666666667	2.29333333333333	3	6.19377175798013e-16	8.33112136393507e-14	--	XP_020177238.1 uncharacterized protein LOC109762777 [Aegilops tauschii subsp. tauschii] [Aegilops tauschii]
TraesCS5D02G491100	12	22	28	108	113	96	0.97	1.68	2.03	8.22	9.37	8.06	1.56	8.55	2.45437839091101	6.25673739278656e-16	8.40615296416382e-14	ZAT5	XP_020198422.1 zinc finger protein ZAT8-like [Aegilops tauschii subsp. tauschii] [Aegilops tauschii]
TraesCS5D02G387900	39	53	70	187	143	194	1.26	1.61	2.02	5.67	4.72	6.47	1.63	5.62	1.78569816598985	6.28341995616081e-16	8.43232075814048e-14	CIPK7	XP_020201532.1 CBL-interacting protein kinase 7-like [Aegilops tauschii subsp. tauschii] [Aegilops tauschii]
TraesCS1B02G178500	154	180	156	338	330	339	9.38	10.36	8.51	19.3	20.59	21.42	9.41666666666667	20.4366666666667	1.11787153711886	6.95314047103104e-16	9.32039409164942e-14	YLS8	XP_020187219.1 thioredoxin-like protein YLS8 [Aegilops tauschii subsp. tauschii] [Aegilops tauschii]
TraesCS4A02G118200	29	9	19	123	104	105	1.87	0.55	1.1	7.47	6.88	7.04	1.17333333333333	7.13	2.60328914852775	7.14825324992845e-16	9.57097130220969e-14	--	VAH90086.1 unnamed protein product [Triticum turgidum subsp. durum] [Triticum turgidum]
TraesCS2A02G176300	56	65	51	194	185	150	2.21	2.42	1.82	7.18	7.48	6.14	2.15	6.93333333333333	1.68921246271784	7.18554772825143e-16	9.60991047149073e-14	AFP-A1	VAH28186.1 unnamed protein product [Triticum turgidum subsp. durum] [Triticum turgidum]
TraesCS7B02G111200	158	123	160	337	378	296	6.7	4.94	6.07	13.44	16.41	13.04	5.90333333333333	14.2966666666667	1.27607710388365	7.2383429487231e-16	9.66946767745975e-14	--	VAI84929.1 unnamed protein product [Triticum turgidum subsp. durum] [Triticum turgidum]
TraesCS6D02G249700	92	112	105	313	237	219	2.86	3.28	2.91	9.08	7.49	7.01	3.01666666666667	7.86	1.38157402100919	7.6573128691213e-16	1.0205854972327e-13	--	XP_020189000.1 F-box/LRR-repeat protein At1g06630-like [Aegilops tauschii subsp. tauschii] [Aegilops tauschii]
TraesCS2B02G484300	31	29	37	114	135	128	1.11	0.97	1.17	3.77	4.88	4.7	1.08333333333333	4.45	2.0383281186591	7.68774691863071e-16	1.02347613186803e-13	CRPK1	XP_020152866.1 putative serine/threonine-protein kinase isoform X1 [Aegilops tauschii subsp. tauschii] [Aegilops tauschii]
TraesCS1A02G220700LC	88	95	75	4	9	5	2.45	2.49	1.87	0.1	0.26	0.14	2.27	0.166666666666667	-3.76765	8.34827070052087e-16	1.11014924308676e-13	pol	KAE8795284.1 putative retrotransposon protein [Hordeum vulgare]
TraesCS3A02G244500	57	70	70	233	173	165	1.04	1.21	1.14	4	3.23	3.12	1.13	3.45	1.61027358925034	8.44495327501332e-16	1.12173135317663e-13	IP5P3	VAH62412.1 unnamed protein product [Triticum turgidum subsp. durum] [Triticum turgidum]
TraesCS1B02G269600	265	233	294	581	501	437	5.46	4.54	5.44	11.27	10.58	9.36	5.14666666666667	10.4033333333333	1.01533560465112	8.6111986000921e-16	1.14251664691607e-13	MED26B	VAH19221.1 unnamed protein product [Triticum turgidum subsp. durum] [Triticum turgidum]
TraesCS5D02G413200	9	5	12	79	85	66	0.34	0.19	0.41	2.79	3.28	2.57	0.313333333333333	2.88	3.20029865048583	8.74470667872241e-16	1.15891626835499e-13	CYP74A1	XP_020193697.1 allene oxide synthase 1, chloroplastic [Aegilops tauschii subsp. tauschii] [Aegilops tauschii]
TraesCS7B02G766300LC	2	4	4	68	76	57	0.07	0.13	0.13	2.28	2.78	2.11	0.11	2.39	4.44143518934345	8.77755503982959e-16	1.1619536717997e-13	--	-
TraesCS5A02G115100	235	208	238	477	518	389	9.38	7.85	8.51	17.89	21.2	16.11	8.58	18.4	1.10065621344483	9.12958105905175e-16	1.2058259985241e-13	AAP3	XP_020197181.1 amino acid permease 3-like [Aegilops tauschii subsp. tauschii] [Aegilops tauschii]
TraesCS7D02G061400	109	86	139	287	319	244	5.15	3.83	5.87	12.72	15.41	11.93	4.95	13.3533333333333	1.43169949012458	9.64669415019535e-16	1.27268933804302e-13	--	XP_020158989.1 histone H1-like isoform X1 [Aegilops tauschii subsp. tauschii] [Aegilops tauschii]
TraesCS4A02G241100LC	295	292	256	645	542	469	3.48	3.25	2.7	7.14	6.54	5.74	3.14333333333333	6.47333333333333	1.0422135247441	1.05965958125789e-15	1.39643562520227e-13	--	XP_020149892.1 uncharacterized protein LOC109735099 isoform X1 [Aegilops tauschii subsp. tauschii] [Aegilops tauschii]
TraesCS3A02G252900	5	8	6	79	82	54	0.15	0.23	0.16	2.21	2.49	1.69	0.18	2.13	3.56478461878353	1.09287760084538e-15	1.43859080546826e-13	MTB2	VAH62722.1 unnamed protein product [Triticum turgidum subsp. durum] [Triticum turgidum]
TraesCS5D02G225700LC	42	45	60	164	159	142	0.47	0.48	0.61	1.74	1.84	1.66	0.52	1.74666666666667	1.7480207826752	1.1314804462229e-15	1.48773151435839e-13	--	-
TraesCS3A02G446500	109	96	79	258	249	227	4.24	3.52	2.77	9.42	9.91	9.15	3.51	9.49333333333333	1.43544370994068	1.15705735892702e-15	1.51965394227113e-13	--	VAH68283.1 unnamed protein product [Triticum turgidum subsp. durum] [Triticum turgidum]
TraesCS3A02G107200	37	30	33	139	138	109	0.94	0.72	0.75	3.31	3.59	2.87	0.803333333333333	3.25666666666667	2.01932541573843	1.32891371415316e-15	1.74145734219072e-13	Os01g0192000	AKM28849.1 TZF1 [Triticum aestivum]
TraesCS5D02G217200	5	1	0	61	64	112	0.15	0.03	0	1.61	1.84	3.27	0.06	2.24	5.22239242133645	1.37193250256553e-15	1.7958197462553e-13	CYP92C6	XP_020190997.1 cytochrome P450 71A1-like [Aegilops tauschii subsp. tauschii] [Aegilops tauschii]
TraesCS4D02G059000	22	17	23	97	102	101	0.56	0.4	0.52	2.27	2.61	2.61	0.493333333333333	2.49666666666667	2.3393685428298	1.40857457358134e-15	1.84172305865515e-13	EGY3	XP_020195613.1 probable zinc metalloprotease EGY3, chloroplastic [Aegilops tauschii subsp. tauschii] [Aegilops tauschii]
TraesCS1D02G100900	2	2	9	65	77	64	0.1	0.09	0.39	2.99	3.86	3.25	0.193333333333333	3.36666666666667	4.12215858251159	1.4125755996188e-15	1.84489310065392e-13	CDKG-1	XP_020158094.1 putative cyclin-dependent kinase F-2 [Aegilops tauschii subsp. tauschii] [Aegilops tauschii]
TraesCS5D02G244800	54	76	71	225	172	173	1.78	2.36	2.09	6.95	5.8	5.91	2.07666666666667	6.22	1.58264491782775	1.4205502554314e-15	1.85324004449379e-13	HSFB1	XP_020177659.1 heat stress transcription factor B-1-like [Aegilops tauschii subsp. tauschii] [Aegilops tauschii]
TraesCS6B02G433700	1	4	3	67	64	68	0.05	0.19	0.14	3.19	3.32	3.57	0.126666666666667	3.36	4.72935241005633	1.58813966373795e-15	2.06956881659179e-13	--	VAI63164.1 unnamed protein product [Triticum turgidum subsp. durum] [Triticum turgidum]
TraesCS6B02G398100	9	10	15	85	104	64	0.17	0.18	0.25	1.49	1.99	1.24	0.2	1.57333333333333	2.97575245375332	1.61766465189225e-15	2.10526884085245e-13	--	VAI62329.1 unnamed protein product [Triticum turgidum subsp. durum] [Triticum turgidum]
TraesCS7B02G431100	179	199	238	57	61	53	3.07	3.21	3.64	0.91	1.1	0.93	3.30666666666667	0.98	-1.75452	1.69126367450909e-15	2.19661551296784e-13	--	VAI93193.1 unnamed protein product [Triticum turgidum subsp. durum] [Triticum turgidum]
TraesCS5B02G494400	173	145	157	357	348	305	6.86	5.43	5.57	13.3	14.15	12.54	5.95333333333333	13.33	1.16290720068891	1.78150915281496e-15	2.31126124257996e-13	EXPA7	VAI39146.1 unnamed protein product [Triticum turgidum subsp. durum] [Triticum turgidum]
TraesCS1A02G423800	99	86	94	266	245	197	7.62	6.27	6.5	19.3	19.35	15.77	6.79666666666667	18.14	1.41627518123308	1.99117641285834e-15	2.58041468643974e-13	LEA14-A	EMS58218.1 Late embryogenesis abundant protein Lea14-A [Triticum urartu]
TraesCS5A02G330500	63	56	64	161	182	182	1.02	0.85	0.93	2.45	3.02	3.05	0.933333333333333	2.84	1.60542660328087	2.42586496690817e-15	3.13332858893519e-13	FER	VAI20525.1 unnamed protein product [Triticum turgidum subsp. durum] [Triticum turgidum]
TraesCS1A02G071700	71	60	82	199	204	176	1.63	1.3	1.68	4.27	4.77	4.18	1.53666666666667	4.40666666666667	1.51988352107835	2.46905803106531e-15	3.18560208281504e-13	CRTISO	VAH01704.1 unnamed protein product [Triticum turgidum subsp. durum] [Triticum turgidum]
TraesCS3D02G256600	12	10	5	79	98	62	0.37	0.29	0.14	2.28	3.08	1.97	0.266666666666667	2.44333333333333	3.19574129324645	2.50997973938e-15	3.2312744671257e-13	MAPKKK17	XP_020169523.1 mitogen-activated protein kinase kinase kinase NPK1-like [Aegilops tauschii subsp. tauschii] [Aegilops tauschii]
TraesCS6A02G093700	27	32	32	98	128	151	0.96	1.08	1.01	3.26	4.65	5.55	1.01666666666667	4.48666666666667	2.14179726216006	2.89409072501638e-15	3.72167345959195e-13	WHAB1.6	EMS57503.1 Chlorophyll a-b binding protein, chloroplastic [Triticum urartu]
TraesCS4B02G224300	36	43	49	127	155	148	0.92	1.04	1.12	3.05	4.05	3.92	1.02666666666667	3.67333333333333	1.83912196787625	2.91431644744661e-15	3.74356903746539e-13	ACR8	VAI07728.1 unnamed protein product [Triticum turgidum subsp. durum] [Triticum turgidum]
TraesCS1A02G188900	113	95	109	307	290	208	4.49	3.57	3.89	11.48	11.84	8.59	3.98333333333333	10.6366666666667	1.41699799041121	2.92945527696918e-15	3.75888942348123e-13	RBL1	AHL43436.1 rhomboid [Triticum turgidum subsp. durum] [Triticum turgidum]
TraesCS7B02G105600	6	2	5	70	71	55	0.2	0.06	0.15	2.22	2.46	1.93	0.136666666666667	2.20333333333333	4.0109544568896	3.03918109995151e-15	3.89541128892142e-13	PUB21	VAI84818.1 unnamed protein product [Triticum turgidum subsp. durum] [Triticum turgidum]
TraesCS5B02G095800	14	11	12	83	118	65	0.33	0.24	0.25	1.84	2.84	1.59	0.273333333333333	2.09	2.93476962818396	3.10703129437741e-15	3.97801987013822e-13	CBP60D	VAI28484.1 unnamed protein product [Triticum turgidum subsp. durum] [Triticum turgidum]
TraesCS7A02G163700	179	204	191	501	371	336	5.19	5.56	4.95	13.59	10.99	10.05	5.23333333333333	11.5433333333333	1.14125782841824	3.15360744076339e-15	4.03323988997829e-13	FAP2	VAI71775.1 unnamed protein product [Triticum turgidum subsp. durum] [Triticum turgidum]
TraesCS4D02G341800	27	20	27	148	164	76	1.54	1.07	1.38	7.91	9.55	4.48	1.33	7.31333333333333	2.45910287418085	3.17053720597818e-15	4.0504651191919e-13	F3H-2	XP_020151382.1 protein DOWNY MILDEW RESISTANCE 6-like [Aegilops tauschii subsp. tauschii] [Aegilops tauschii]
TraesCS1D02G204800	17	4	10	95	104	65	0.3	0.06	0.16	1.58	1.88	1.19	0.173333333333333	1.55	3.1606471878543	3.1885019070422e-15	4.06897350235434e-13	PMI1	XP_020180096.1 protein PLASTID MOVEMENT IMPAIRED 1-like [Aegilops tauschii subsp. tauschii] [Aegilops tauschii]
TraesCS3B02G317500	4	8	5	67	68	63	0.33	0.61	0.36	5.11	5.66	5.31	0.433333333333333	5.36	3.62868387815048	3.23806488408886e-15	4.12772144734038e-13	--	CDM84096.1 unnamed protein product [Triticum aestivum]
TraesCS7B02G269900	148	124	146	379	331	257	5.23	4.14	4.62	12.58	11.97	9.4	4.66333333333333	11.3166666666667	1.27901561196735	3.31310566256375e-15	4.21878401354227e-13	Os06g0561000	VAI89819.1 unnamed protein product [Triticum turgidum subsp. durum] [Triticum turgidum]
TraesCS4D02G051900	99	130	148	283	270	275	2.91	3.64	3.94	7.84	8.17	8.42	3.49666666666667	8.14333333333333	1.21963918568999	3.38098880988676e-15	4.30054426641923e-13	DDB_G0269086	XP_020154582.1 uncharacterized protein LOC109739926 [Aegilops tauschii subsp. tauschii] [Aegilops tauschii]
TraesCS4D02G212400	72	89	86	195	231	206	5.49	6.41	5.87	13.97	18.04	16.29	5.92333333333333	16.1	1.44257950769446	3.61640027860389e-15	4.59000426684148e-13	HSP17.9A	XP_020174826.1 17.9 kDa class I heat shock protein-like [Aegilops tauschii subsp. tauschii] [Aegilops tauschii]
TraesCS2D02G405500	228	224	264	479	516	392	19.12	17.68	19.77	37.64	44.19	34.06	18.8566666666667	38.63	1.03464700730931	3.68343518162292e-15	4.66496701108092e-13	UBI11	XP_022681640.1 polyubiquitin [Setaria italica]
TraesCS7D02G273100	12	7	15	103	91	60	0.54	0.3	0.61	4.37	4.21	2.81	0.483333333333333	3.79666666666667	2.97364294169318	3.71853729982331e-15	4.70433158810728e-13	NIP2	XP_020198645.1 NEP1-interacting protein-like 1 [Aegilops tauschii subsp. tauschii] [Aegilops tauschii]
TraesCS6A02G146400	226	250	321	450	571	539	3.74	3.91	4.77	7.01	9.69	9.25	4.14	8.65	1.06306936502476	3.84373083691799e-15	4.85746295893971e-13	CLPB3	VAI44432.1 unnamed protein product [Triticum turgidum subsp. durum] [Triticum turgidum]
TraesCS2B02G117400	7	5	20	86	93	75	0.26	0.17	0.66	2.96	3.5	2.85	0.363333333333333	3.10333333333333	3.09445303278187	3.8702305540659e-15	4.8856755113042e-13	BDG4	VAH42023.1 unnamed protein product [Triticum turgidum subsp. durum] [Triticum turgidum]
TraesCS1A02G387600	14	17	6	97	112	66	0.36	0.42	0.15	2.41	3.02	1.81	0.31	2.41333333333333	2.96068707597517	3.89226491110047e-15	4.90819638390948e-13	NSL1	VAH10792.1 unnamed protein product [Triticum turgidum subsp. durum] [Triticum turgidum]
TraesCS1A02G094900	1	2	1	99	80	70	0.04	0.07	0.03	3.58	3.16	2.78	0.0466666666666667	3.17333333333333	6.08746284125034	4.34906394349127e-15	5.47243183650791e-13	PAL	VAH02418.1 unnamed protein product [Triticum turgidum subsp. durum] [Triticum turgidum]
TraesCS2B02G491100	1013	853	783	322	408	305	28.69	22.81	19.84	8.56	11.84	8.95	23.78	9.78333333333333	-1.28135	4.4456605947509e-15	5.5879709357566e-13	AS1	BAH36896.1 polyphenol oxidase [Triticum aestivum]
TraesCS5B02G463000	176	213	223	356	418	433	12.61	14.42	14.35	24.03	30.76	32.21	13.7933333333333	29	1.07208175576345	4.89646065358968e-15	6.13483531696329e-13	WHAB1.6	VAI38498.1 unnamed protein product [Triticum turgidum subsp. durum] [Triticum turgidum]
TraesCS4D02G089600	94	88	112	229	249	220	3.86	3.42	4.12	8.84	10.48	9.35	3.8	9.55666666666667	1.33050808018842	5.42569935960533e-15	6.79065444341963e-13	CRK6	XP_020148261.1 cysteine-rich receptor-like protein kinase 25 [Aegilops tauschii subsp. tauschii] [Aegilops tauschii]
TraesCS2A02G417300	40	42	43	151	146	119	1.5	1.49	1.44	5.32	5.61	4.62	1.47666666666667	5.18333333333333	1.81153597646294	5.7250708985358e-15	7.15768425949206e-13	ERF1A	VAH35539.1 unnamed protein product [Triticum turgidum subsp. durum] [Triticum turgidum]
TraesCS6B02G183800	18	21	22	94	100	93	0.59	0.64	0.65	2.85	3.31	3.11	0.626666666666667	3.09	2.30183667694789	6.2836496473984e-15	7.84765473893123e-13	ALIS3	VAI56350.1 unnamed protein product [Triticum turgidum subsp. durum] [Triticum turgidum]
TraesCS5B02G467700LC	151	125	131	387	361	248	8.23	6.43	6.39	19.82	20.13	14.01	7.01666666666667	17.9866666666667	1.35807011499451	6.34170300320142e-15	7.91171395352491e-13	--	PUZ51901.1 hypothetical protein GQ55_6G228300 [Panicum hallii var. hallii] [Panicum hallii]
TraesCS4D02G201100	126	150	179	370	326	276	6.21	6.72	7.87	16.11	15.94	13.12	6.93333333333333	15.0566666666667	1.11878138540907	6.55761677680847e-15	8.17236880144494e-13	GSTZ5	XP_020176416.1 protein IN2-1 homolog B [Aegilops tauschii subsp. tauschii] [Aegilops tauschii]
TraesCS2B02G680700LC	123	158	167	9	37	15	4.14	5	5.01	0.28	1.27	0.53	4.71666666666667	0.693333333333333	-2.76615	6.66356178071814e-15	8.29556730535317e-13	RE1	XP_020161735.1 uncharacterized protein LOC109747051 [Aegilops tauschii subsp. tauschii] [Aegilops tauschii]
TraesCS6D02G275600	11	14	8	104	86	58	0.55	0.66	0.36	4.88	4.4	3.01	0.523333333333333	4.09666666666667	2.96864845148104	6.96683998020012e-15	8.66390593159382e-13	--	XP_020170108.1 uncharacterized protein LOC109755622 [Aegilops tauschii subsp. tauschii] [Aegilops tauschii]
TraesCS1D02G223400	4	6	7	71	64	58	0.15	0.22	0.24	2.55	2.49	2.3	0.203333333333333	2.44666666666667	3.58889891528033	7.2521834759624e-15	8.99009549495839e-13	--	XP_020156318.1 uncharacterized protein LOC109741654 isoform X2 [Aegilops tauschii subsp. tauschii] [Aegilops tauschii]
TraesCS6D02G237800	4	1	3	59	93	51	0.19	0.05	0.11	2.27	3.89	2.16	0.116666666666667	2.77333333333333	4.57115670119612	7.30685465946206e-15	9.04828302602719e-13	ERF026	XP_020159886.1 ethylene-responsive transcription factor ERF027-like [Aegilops tauschii subsp. tauschii] [Aegilops tauschii]
TraesCS5D02G484000	8	9	6	85	82	51	0.47	0.5	0.31	4.66	4.9	3.09	0.426666666666667	4.21666666666667	3.30492166958167	7.68130236165358e-15	9.50191717722436e-13	At5g01750	XP_020189278.1 protein LURP-one-related 15-like [Aegilops tauschii subsp. tauschii] [Aegilops tauschii]
TraesCS1D02G185500	57	40	68	178	205	146	1.68	1.11	1.79	4.93	6.18	4.47	1.52666666666667	5.19333333333333	1.76627572996472	7.73722747878444e-15	9.56099085556824e-13	At2g46620	XP_020192168.1 AAA-ATPase At2g46620 [Aegilops tauschii subsp. tauschii] [Aegilops tauschii]
TraesCS7A02G411400	237	194	221	563	427	376	4.35	3.36	3.63	9.71	8.02	7.16	3.78	8.29666666666667	1.13414559003881	8.30846552217834e-15	1.02452397506465e-12	XAT2	VAI78824.1 unnamed protein product [Triticum turgidum subsp. durum] [Triticum turgidum]
TraesCS4B02G051600	39	76	74	195	198	171	1	1.85	1.71	4.72	5.22	4.58	1.52	4.84	1.67093572383101	8.68236472597062e-15	1.06950282627635e-12	DDB_G0269086	VAI01760.1 unnamed protein product [Triticum turgidum subsp. durum] [Triticum turgidum]
TraesCS2D02G411300	89	67	85	193	225	214	3.7	2.63	3.16	7.54	9.58	9.22	3.16333333333333	8.78	1.47277535323541	8.91070613790696e-15	1.09647597651961e-12	CYCP2-1	XP_020164577.1 cyclin-P2-1-like [Aegilops tauschii subsp. tauschii] [Aegilops tauschii]
TraesCS1A02G070600	78	79	86	234	195	181	1.45	1.4	1.43	4.09	3.72	3.5	1.42666666666667	3.77	1.40191622758867	9.86329895061006e-15	1.20987732683259e-12	CCR3	VAH01676.1 unnamed protein product [Triticum turgidum subsp. durum] [Triticum turgidum]
TraesCS2D02G565300	412	423	403	163	172	110	12.69	12.31	11.13	4.72	5.43	3.53	12.0433333333333	4.56	-1.40113	9.90565330844032e-15	1.21380037849246e-12	ALN	SPT20941.1 unnamed protein product [Triticum aestivum]
TraesCS6D02G274500	122	146	147	347	315	248	3.06	3.47	3.31	8.19	8.09	6.46	3.28	7.58	1.20850203355301	1.02713404156265e-14	1.25729372188017e-12	PUB11	XP_020174763.1 U-box domain-containing protein 11-like [Aegilops tauschii subsp. tauschii] [Aegilops tauschii]
TraesCS1D02G084200	30	37	42	139	122	117	0.79	0.92	0.99	3.45	3.31	3.21	0.9	3.32333333333333	1.88463409734736	1.06951608938647e-14	1.30780472113045e-12	PIL15	XP_020164967.1 transcription factor APG-like [Aegilops tauschii subsp. tauschii] [Aegilops tauschii]
[truncated: 2,185 more rows]
