# Supplementary material for: The TaBBM-TaWRKY41-TacAGPS1a module affects starch synthesis and grain quality by regulating embryo and endosperm development in wheat
Source: Research Square preprint supplement (doi:10.21203/rs.3.rs-8619315/v1), 2026-01-27
Supplement: Supplementary file 8 [file 8a0b4cff105c987da7032b0e.xlsx]

## Sheet: Sheet1
Supplementary Data 7.Embryo transcriptome-derived DEGs with TaBBM-B1 DAP-seq datasets.
Triticum aestivum (IWGSC RefSeqv1.1)	Symbol	Description	Grain-filling replicate 1	Grain-filling replicate 2	Grain-filling replicate 3	Resources
TraesCS1D02G335500	ACA12	Calcium-transporting ATPase 12, plasma membrane-type [Dichanthelium oligosanthes]	0.52	1.02	0.69	https://plantrnadb.com//wheatrna/
TraesCS2A02G428400	45206	organic cation/carnitine transporter 7 isoform X1 [Aegilops tauschii subsp. tauschii] [Aegilops tauschii]	2.95	2.26	2.23	https://plantrnadb.com//wheatrna/
TraesCS6D02G366100	DREB1A	CRT/DRE binding factor 18 [Triticum monococcum]	0	0.38	0	https://plantrnadb.com//wheatrna/
TraesCS6D02G291300	GATL9	probable galacturonosyltransferase-like 9 [Aegilops tauschii subsp. tauschii] [Aegilops tauschii]	3.8	4.33	3.7	https://plantrnadb.com//wheatrna/
TraesCS4B02G391800	-	salt-inducible protein [Leymus chinensis]	22.39	24.55	25.23	https://plantrnadb.com//wheatrna/
TraesCS7D02G204700	TIFY3A	protein TIFY 11e-like [Aegilops tauschii subsp. tauschii] [Aegilops tauschii]	0	1.49	1.44	https://plantrnadb.com//wheatrna/
TraesCS2A02G570300	-	Thaumatin-like protein [Triticum urartu]	2.88	4.25	4.43	https://plantrnadb.com//wheatrna/
TraesCS5B02G098900	CBP60B	PREDICTED: calmodulin-binding protein 60 D-like [Brachypodium distachyon]	2.53	0.92	1.28	https://plantrnadb.com//wheatrna/
TraesCS6D02G333900	RLP6	Leucine-rich repeat receptor-like protein kinase family protein	0.66	0.07	0.08	https://plantrnadb.com//wheatrna/
TraesCS6D02G062200	HAK19	potassium transporter 19-like [Aegilops tauschii subsp. tauschii] [Aegilops tauschii]	5.36	6.92	6.16	https://plantrnadb.com//wheatrna/
TraesCS4A02G405400	-	arabinogalactan protein 1-like [Aegilops tauschii subsp. tauschii] [Aegilops tauschii]	4.19	19.45	14.3	https://plantrnadb.com//wheatrna/
TraesCS6B02G342200	FH16	formin-like protein 16 [Aegilops tauschii subsp. tauschii] [Aegilops tauschii]	5.08	7.27	5.79	https://plantrnadb.com//wheatrna/
TraesCS2A02G156800	RING1	E3 ubiquitin-protein ligase RDUF1-like [Aegilops tauschii subsp. tauschii] [Aegilops tauschii]	1.58	3.03	2.29	https://plantrnadb.com//wheatrna/
TraesCS4B02G212300	HSP17.4	17.9 kDa class I heat shock protein [Aegilops tauschii subsp. tauschii] [Aegilops tauschii]	14.39	8.04	8.27	https://plantrnadb.com//wheatrna/
TraesCS1A02G375600	HSFA2C	heat shock transcription factor A6e [Triticum aestivum]	8.21	8.13	6.8	https://plantrnadb.com//wheatrna/
TraesCS7D02G031900	-	-	23.4	28.26	29.56	https://plantrnadb.com//wheatrna/
TraesCS4A02G328100	ASPG1	aspartyl protease 25-like [Aegilops tauschii subsp. tauschii] [Aegilops tauschii]	5.99	4.05	3.59	https://plantrnadb.com//wheatrna/
TraesCS2D02G162600	At3g19950	E3 ubiquitin-protein ligase RDUF1-like [Aegilops tauschii subsp. tauschii] [Aegilops tauschii]	1.61	3.23	2.48	https://plantrnadb.com//wheatrna/
TraesCS6D02G302900	Os02g0774100	thioredoxin-like 3-1, chloroplastic [Aegilops tauschii subsp. tauschii] [Aegilops tauschii]	5.54	3.65	3.33	https://plantrnadb.com//wheatrna/
TraesCS3D02G520100	-	Os01g0967600, partial [Oryza sativa Japonica Group]	11.73	11.63	12.56	https://plantrnadb.com//wheatrna/
TraesCS2B02G187500	WRKY41	-	2.31	1.86	0.96	https://plantrnadb.com//wheatrna/
TraesCS7B02G083500	HSP26.2	26.2 kDa heat shock protein, mitochondrial-like [Aegilops tauschii subsp. tauschii] [Aegilops tauschii]	5.69	2.64	3.24	https://plantrnadb.com//wheatrna/
TraesCS4D02G070400	ARI1	probable E3 ubiquitin-protein ligase ARI1 [Aegilops tauschii subsp. tauschii] [Aegilops tauschii]	0.17	0.22	0.14	https://plantrnadb.com//wheatrna/
TraesCS3A02G343900	WRKY11	probable WRKY transcription factor 38 [Aegilops tauschii subsp. tauschii] [Aegilops tauschii]	1.4	1.32	1.15	https://plantrnadb.com//wheatrna/
