# Supplementary material for: The TaBBM-TaWRKY41-TacAGPS1a module affects starch synthesis and grain quality by regulating embryo and endosperm development in wheat
Source: Research Square preprint supplement (doi:10.21203/rs.3.rs-8619315/v1), 2026-01-27
Supplement: Supplementary file 9 [file 90efc8d3935b9fe9a7e38fd7.xlsx]

## Sheet: Sheet1
Supplementary Data 5. The list DAP-seq peak anno.
motif_id	motif_alt_id	sequence_name	start	stop	strand	score	p-value	q-value	matched_sequence	distToSummit	peak_name	chr	start	end	length	abs_summit	pileup	fold_enrichment	#NAME?	#NAME?	annotation	geneChr	geneStart	geneEnd	geneLength	exonNumber	geneStrand	geneId	transcriptId	distToTSS
GCACGSAWHYCGAGG	MEME-1	chr6A	328854917	328854931	+	23.5789	3.38e-09	0.0005	GCACGGATCCCGAGG	35	IP_peak_21407	chr6A	328854755	328855040	286	328854882	18.17	16.4351	31.9434	26.8449	Promoter (<=1kb)	chr6A	328855705	328856706	1002	1	+	TraesCS6A02G335400LC	TraesCS6A02G335400LC.1	-823
GCACGSAWHYCGAGG	MEME-1	chr5B	417366278	417366292	+	23.5789	3.38e-09	0.0005	GCACGGATCCCGAGG	-6	IP_peak_18753	chr5B	417366224	417366470	247	417366298	10.38	7.87288	11.6355	7.5455	Promoter (<=1kb)	chr5B	417366961	417367494	534	1	+	TraesCS5B02G381900LC	TraesCS5B02G381900LC.1	-663
GCACGSAWHYCGAGG	MEME-1	chr3A	740114384	740114398	-	23.5263	4.5e-09	0.0005	GCACGGATCTCGAGG	-17	IP_peak_9784	chr3A	740114282	740114563	282	740114415	19.04	10.0191	18.7993	14.3011	Promoter (<=1kb)	chr3A	740112688	740114193	1506	1	-	TraesCS3A02G526600	TraesCS3A02G526600.1	-222
GCACGSAWHYCGAGG	MEME-1	chr1A	272692084	272692098	-	23.3158	6.67e-09	0.0005	GCACGGATTTCGAGG	-4	IP_peak_518	chr1A	272692028	272692282	255	272692102	10.38	9.75887	16.2298	11.8542	Promoter (1-2kb)	chr1A	272694017	272694599	583	1	+	TraesCS1A02G258900LC	TraesCS1A02G258900LC.1	-1915
GCACGSAWHYCGAGG	MEME-1	chr1A	34150620	34150634	-	22.8816	7.79e-09	0.0005	GCACGGAAACCGAGG	7	IP_peak_115	chr1A	34150451	34150934	484	34150613	13.85	9.01531	13.852	9.63119	Promoter (<=1kb)	chr1A	34146866	34149852	2987	4	-	TraesCS1A02G052100	TraesCS1A02G052100.1	-761
GCACGSAWHYCGAGG	MEME-1	chr1D	425670213	425670227	-	22.8816	7.79e-09	0.0005	GCACGGAAACCGAGG	0	IP_peak_3354	chr1D	425670034	425670441	408	425670220	57.11	14.5286	51.9784	46.0446	Promoter (1-2kb)	chr1D	425672166	425675868	3703	2	+	TraesCS1D02G335500	TraesCS1D02G335500.1	-1946
GCACGSAWHYCGAGG	MEME-1	chr2A	553492305	553492319	-	22.8816	7.79e-09	0.0005	GCACGGAAACCGAGG	-31	IP_peak_4617	chr2A	553492187	553492559	373	553492350	6.92	6.79165	9.21445	5.3363	Promoter (<=1kb)	chr2A	553482941	553491815	8875	7	-	TraesCS2A02G323500	TraesCS2A02G323500.1	-535
GCACGSAWHYCGAGG	MEME-1	chr2A	681192704	681192718	+	22.8816	7.79e-09	0.0005	GCACGGAAACCGAGG	0	IP_peak_4881	chr2A	681192421	681192829	409	681192715	7.79	7.18578	9.90484	5.97593	Promoter (<=1kb)	chr2A	681193083	681195912	2830	6	+	TraesCS2A02G428400	TraesCS2A02G428400.2	-368
GCACGSAWHYCGAGG	MEME-1	chr2B	789952277	789952291	+	22.8816	7.79e-09	0.0005	GCACGGAAACCGAGG	18	IP_peak_6829	chr2B	789952066	789952424	359	789952259	26.83	13.1562	27.2264	22.3523	Promoter (1-2kb)	chr2B	789949968	789951203	1236	1	-	TraesCS2B02G610300	TraesCS2B02G610300.1	-1056
GCACGSAWHYCGAGG	MEME-1	chr7A	308914548	308914562	-	22.8289	9.95e-09	0.0005	GCACGGAAATCGAGG	-32	IP_peak_25123	chr7A	308914510	308914735	226	308914594	11.25	10.5007	18.0879	13.6263	Promoter (1-2kb)	chr7A	308912552	308912938	387	1	-	TraesCS7A02G376500LC	TraesCS7A02G376500LC.1	-1656
GCACGSAWHYCGAGG	MEME-1	chr6D	454802595	454802609	-	22.8289	9.95e-09	0.0005	GCACGGAAATCGAGG	0	IP_peak_24300	chr6D	454802447	454802696	250	454802604	21.63	7.54473	15.2574	10.9453	Promoter (1-2kb)	chr6D	454799522	454800695	1174	1	-	TraesCS6D02G366100	TraesCS6D02G366100.1	-1909
GCACGSAWHYCGAGG	MEME-1	chr2B	744483954	744483968	-	22.8289	9.95e-09	0.0005	GCACGGAAATCGAGG	24	IP_peak_6713	chr2B	744483815	744484079	265	744483930	10.38	9.75887	16.2298	11.8542	Promoter (1-2kb)	chr2B	744476492	744482766	6275	6	-	TraesCS2B02G817800LC	TraesCS2B02G817800LC.1	-1164
GCACGSAWHYCGAGG	MEME-1	chr7B	236333056	236333070	-	22.1447	2.42e-08	0.00108	GCACGAATCCCGAGG	-32	IP_peak_26548	chr7B	236332982	236333288	307	236333102	8.65	7.75199	11.148	7.09562	Promoter (<=1kb)	chr7B	236330182	236333085	2904	2	-	TraesCS7B02G168500	TraesCS7B02G168500.1	-17
GCACGSAWHYCGAGG	MEME-1	chr5A	649462696	649462710	+	22.0921	2.63e-08	0.00116	GCACGAATCTCGAGG	0	IP_peak_17815	chr5A	649462565	649462862	298	649462698	21.63	10.7014	20.4728	15.8627	Promoter (<=1kb)	chr5A	649462894	649463400	507	1	+	TraesCS5A02G638900LC	TraesCS5A02G638900LC.1	-196
GCACGSAWHYCGAGG	MEME-1	chr5A	653041042	653041056	+	22.0921	2.63e-08	0.00116	GCACGAATCTCGAGG	28	IP_peak_17827	chr5A	653040895	653041156	262	653041014	17.31	7.83005	14.0791	9.85206	Promoter (<=1kb)	chr5A	653041896	653042219	324	1	+	TraesCS5A02G645900LC	TraesCS5A02G645900LC.1	-882
GCACGSAWHYCGAGG	MEME-1	chr1D	37559642	37559656	-	21.3947	4.9e-08	0.00143	GCACGAAAATCGAGG	0	IP_peak_2710	chr1D	37559505	37559822	318	37559650	30.29	13.3818	30.5566	25.5341	Promoter (<=1kb)	chr1D	37560421	37570424	10004	7	+	TraesCS1D02G057300	TraesCS1D02G057300.1	-771
GCACGSAWHYCGAGG	MEME-1	chr5A	445673364	445673378	-	21.3947	4.9e-08	0.00143	GCACGAAAATCGAGG	0	IP_peak_17285	chr5A	445673138	445673555	418	445673372	33.75	26.9392	56.875	50.7762	Promoter (1-2kb)	chr5A	445671670	445672157	488	2	-	TraesCS5A02G230800	TraesCS5A02G230800.1	-1215
GCACGSAWHYCGAGG	MEME-1	chr4A	730107567	730107581	-	21.3947	4.9e-08	0.00143	GCACGAAAATCGAGG	0	IP_peak_14255	chr4A	730107434	730107710	277	730107579	26.83	13.9132	28.4555	23.512	Promoter (1-2kb)	chr4A	730109150	730109503	354	1	+	TraesCS4A02G700100LC	TraesCS4A02G700100LC.1	-1571
GCACGSAWHYCGAGG	MEME-1	chr1D	194658461	194658475	+	21.3947	4.9e-08	0.00143	GCACGAAAATCGAGG	-85	IP_peak_2946	chr1D	194658379	194658706	328	194658560	15.58	8.28831	13.7287	9.50863	Promoter (<=1kb)	chr1D	194656771	194657625	855	1	-	TraesCS1D02G213900LC	TraesCS1D02G213900LC.1	-935
GCACGSAWHYCGAGG	MEME-1	chr7A	204721102	204721116	-	21.1316	6.48e-08	0.00155	GCACGGAAAACGAGG	-13	IP_peak_24943	chr7A	204720992	204721249	258	204721129	10.38	9.75887	16.2298	11.8542	Promoter (1-2kb)	chr7A	204718723	204719160	438	1	-	TraesCS7A02G299700LC	TraesCS7A02G299700LC.1	-1969
GCACGSAWHYCGAGG	MEME-1	chr4B	21214937	21214951	-	20.7895	8.95e-08	0.00185	GCACGCTTTCCGAGG	0	IP_peak_14363	chr4B	21214782	21215049	268	21214940	16.44	8.721	14.9606	10.6567	Promoter (<=1kb)	chr4B	21215535	21219354	3820	4	+	TraesCS4B02G028700	TraesCS4B02G028700.1	-595
GCACGSAWHYCGAGG	MEME-1	chr4B	377948328	377948342	+	20.6974	9.71e-08	0.00187	GCGCGGATTTCGAGG	0	IP_peak_14900	chr4B	377948164	377948450	287	377948336	23.36	18.5677	36.0558	30.7892	Promoter (1-2kb)	chr4B	377950192	377950572	381	1	+	TraesCS4B02G313700LC	TraesCS4B02G313700LC.1	-1856
GCACGSAWHYCGAGG	MEME-1	chr4A	492895985	492895999	-	20.6974	9.71e-08	0.00187	GCGCGGATTTCGAGG	0	IP_peak_13673	chr4A	492895901	492896138	238	492895995	12.12	9.06977	14.5322	10.2469	Promoter (<=1kb)	chr4A	492895124	492895348	225	1	-	TraesCS4A02G338100LC	TraesCS4A02G338100LC.1	-647
GCACGSAWHYCGAGG	MEME-1	chr1B	597454225	597454239	+	20.6711	1e-07	0.00192	GCACGGATCTCGATG	1	IP_peak_2345	chr1B	597454098	597454370	273	597454224	19.9	10.4517	18.7993	14.3011	Promoter (<=1kb)	chr1B	597451089	597453989	2901	3	-	TraesCS1B02G366200	TraesCS1B02G366200.1	-235
GCACGSAWHYCGAGG	MEME-1	chr2B	245892278	245892292	-	20.3947	1.17e-07	0.00203	GCACGAATCACGAGG	-21	IP_peak_5822	chr2B	245892163	245892470	308	245892313	22.5	15.3068	28.8786	23.9294	Promoter (1-2kb)	chr2B	245890622	245891086	465	1	-	TraesCS2B02G332700LC	TraesCS2B02G332700LC.1	-1227
GCACGSAWHYCGAGG	MEME-1	chr5D	520349096	520349110	+	20.3947	1.17e-07	0.00203	GCACGAATCACGAGG	0	IP_peak_20529	chr5D	520348691	520349302	612	520349106	32.88	18.565	40.0407	34.6183	Promoter (1-2kb)	chr5D	520347457	520348065	609	1	-	TraesCS5D02G483900	TraesCS5D02G483900.1	-1041
GCACGSAWHYCGAGG	MEME-1	chr5A	275088829	275088843	+	20.2632	1.24e-07	0.00213	GCGCGGAAACCGAGG	0	IP_peak_16967	chr5A	275088646	275088957	312	275088834	19.04	15.8077	29.9465	24.9309	Promoter (1-2kb)	chr5A	275090587	275101375	10789	10	+	TraesCS5A02G125100	TraesCS5A02G125100.1	-1753
GCACGSAWHYCGAGG	MEME-1	chr2B	364132379	364132393	+	20.2105	1.31e-07	0.00213	GCGCGGAAATCGAGG	89	IP_peak_5977	chr2B	364132166	364132413	248	364132290	3.46	3.786	4.43632	1.54075	Promoter (1-2kb)	chr2B	364134233	364137336	3104	8	+	TraesCS2B02G268800	TraesCS2B02G268800.1	-1943
GCACGSAWHYCGAGG	MEME-1	chr6A	579811545	579811559	-	20.1842	1.36e-07	0.00213	GCACGAATTACGAGG	0	IP_peak_21948	chr6A	579811417	579811698	282	579811552	25.96	6.74026	15.4524	11.1365	Promoter (<=1kb)	chr6A	579811751	579812275	525	1	+	TraesCS6A02G347100	TraesCS6A02G347100.1	-199
GCACGSAWHYCGAGG	MEME-1	chr1B	215512413	215512427	+	20.0921	1.44e-07	0.00214	GCACGAAGATCGAGG	0	IP_peak_1682	chr1B	215512270	215512571	302	215512419	23.36	15.4224	29.715	24.7458	Promoter (1-2kb)	chr1B	215510953	215511368	416	2	-	TraesCS1B02G259300LC	TraesCS1B02G259300LC.1	-1051
GCACGSAWHYCGAGG	MEME-1	chr5B	433648550	433648564	+	20.0921	1.44e-07	0.00214	GCACGAAGATCGAGG	59	IP_peak_18788	chr5B	433648380	433648621	242	433648491	13.85	9.67011	14.9575	10.6567	Promoter (<=1kb)	chr5B	433649486	433650280	795	1	+	TraesCS5B02G400800LC	TraesCS5B02G400800LC.1	-995
GCACGSAWHYCGAGG	MEME-1	chr3B	815381148	815381162	+	20.0132	1.58e-07	0.00232	GCACGCATACCGATG	0	IP_peak_11366	chr3B	815381026	815381248	223	815381148	19.04	6.67937	13.1909	8.99136	Promoter (<=1kb)	chr3B	815381554	815389053	7500	17	+	TraesCS3B02G590400	TraesCS3B02G590400.1	-406
GCACGSAWHYCGAGG	MEME-1	chr6D	401735652	401735666	+	19.8947	1.72e-07	0.00246	GCACGGTGATCGAGG	0	IP_peak_24136	chr6D	401735494	401735778	285	401735660	27.69	7.17295	17.3804	12.9788	Promoter (1-2kb)	chr6D	401736790	401738664	1875	1	+	TraesCS6D02G291300	TraesCS6D02G291300.1	-1130
GCACGSAWHYCGAGG	MEME-1	chr4D	58630186	58630200	-	19.8289	1.8e-07	0.00256	GCACAGTTACCGAGG	-3	IP_peak_15706	chr4D	58630049	58630359	311	58630203	11.25	8.47132	13.0666	8.8809	Promoter (<=1kb)	chr4D	58630923	58631450	528	1	+	TraesCS4D02G078600LC	TraesCS4D02G078600LC.1	-720
GCACGSAWHYCGAGG	MEME-1	chr4B	592624808	592624822	+	19.7763	1.89e-07	0.00269	GCACAGTTATCGAGG	29	IP_peak_15330	chr4B	592624624	592624876	253	592624779	15.58	9.19466	15.1742	10.8656	Promoter (<=1kb)	chr4B	592624831	592629372	4542	9	+	TraesCS4B02G304300	TraesCS4B02G304300.1	-52
GCACGSAWHYCGAGG	MEME-1	chr4A	439768933	439768947	+	19.6974	2.09e-07	0.00287	GCACGAAAAACGAGG	-74	IP_peak_13577	chr4A	439768810	439769063	254	439769021	12.98	6.99026	10.1966	6.23501	Promoter (<=1kb)	chr4A	439769559	439769819	261	1	+	TraesCS4A02G173000	TraesCS4A02G173000.1	-538
GCACGSAWHYCGAGG	MEME-1	chr5D	546080501	546080515	+	19.5263	2.35e-07	0.00318	GCGCGAATCCCGAGG	29	IP_peak_20610	chr5D	546080302	546080620	319	546080472	25.96	18.6449	35.9086	30.6436	Promoter (<=1kb)	chr5D	546080634	546084588	3955	10	+	TraesCS5D02G529600	TraesCS5D02G529600.1	-162
GCACGSAWHYCGAGG	MEME-1	chr4A	623321792	623321806	-	19.4737	2.46e-07	0.00328	GCGCGAATCTCGAGG	0	IP_peak_13981	chr4A	623321636	623321971	336	623321803	30.29	10.4293	25.4237	20.6357	Promoter (<=1kb)	chr4A	623317786	623321746	3961	10	-	TraesCS4A02G343400	TraesCS4A02G343400.1	-57
GCACGSAWHYCGAGG	MEME-1	chrUn	99491912	99491926	+	19.2632	2.79e-07	0.00328	GCGCGCAAATCGAGG	-24	IP_peak_29212	chrUn	99491821	99492051	231	99491950	13.85	7.42295	11.3449	7.27452	Promoter (<=1kb)	chrUn	99491273	99491713	441	1	-	TraesCSU02G193900LC	TraesCSU02G193900LC.1	-237
GCACGSAWHYCGAGG	MEME-1	chr7D	568376858	568376872	-	19.25	2.82e-07	0.00328	GCACGGACTTCGAGG	-12	IP_peak_28734	chr7D	568376752	568377040	289	568376884	24.23	21.6277	44.7202	39.0872	Promoter (1-2kb)	chr7D	568374758	568375189	432	3	-	TraesCS7D02G614500LC	TraesCS7D02G614500LC.1	-1695
GCACGSAWHYCGAGG	MEME-1	chr1D	439872261	439872275	+	19.2368	2.83e-07	0.00328	GCACGAATCTCGATG	0	IP_peak_3396	chr1D	439872142	439872377	236	439872272	21.63	4.52684	9.46042	5.56763	Promoter (<=1kb)	chr1D	439869194	439872115	2922	3	-	TraesCS1D02G355000	TraesCS1D02G355000.1	-157
GCACGSAWHYCGAGG	MEME-1	chr4A	211004384	211004398	-	19.2237	2.88e-07	0.00328	GCACGCGAACCGAGG	-7	IP_peak_13123	chr4A	211004296	211004617	322	211004405	20.77	15.0542	27.2565	22.3793	Promoter (1-2kb)	chr4A	211001329	211002925	1597	8	-	TraesCS4A02G169000LC	TraesCS4A02G169000LC.1	-1480
GCACGSAWHYCGAGG	MEME-1	chr5B	570975667	570975681	+	19.1711	2.94e-07	0.00331	GCACAGAGATCGAGG	0	IP_peak_19055	chr5B	570975499	570975904	406	570975667	20.77	18.6605	36.1238	30.818	Promoter (<=1kb)	chr5B	570974657	570975076	420	1	-	TraesCS5B02G584500LC	TraesCS5B02G584500LC.1	-591
GCACGSAWHYCGAGG	MEME-1	chr4D	196241725	196241739	-	19.1316	2.97e-07	0.00333	GCACGGATCCCAAGG	6	IP_peak_15892	chr4D	196241490	196241847	358	196241719	27.69	14.3459	29.9032	24.8916	Promoter (<=1kb)	chr4D	196240002	196240727	726	1	-	TraesCS4D02G183900LC	TraesCS4D02G183900LC.1	-992
GCACGSAWHYCGAGG	MEME-1	chr3B	790544433	790544447	-	19.0789	3.09e-07	0.00344	GCGCGCAACCCGAGG	0	IP_peak_11275	chr3B	790544308	790544594	287	790544441	27.69	9.56393	21.8929	17.2306	Promoter (1-2kb)	chr3B	790541160	790542734	1575	1	-	TraesCS3B02G556600	TraesCS3B02G556600.1	-1707
GCACGSAWHYCGAGG	MEME-1	chrUn	289774241	289774255	+	19.0395	3.14e-07	0.00346	GCACAAAAATCGAGG	0	IP_peak_29314	chrUn	289774103	289774380	278	289774249	26.83	4.63774	11.2515	7.19163	Promoter (<=1kb)	chrUn	289772748	289773619	872	2	-	TraesCSU02G368500LC	TraesCSU02G368500LC.1	-630
GCACGSAWHYCGAGG	MEME-1	chr3A	711147045	711147059	-	18.8421	3.51e-07	0.00372	GCACGCAACCCGATG	0	IP_peak_9649	chr3A	711146917	711147196	280	711147050	9.52	8.01622	11.7383	7.64491	Promoter (1-2kb)	chr3A	711148253	711148819	567	1	+	TraesCS3A02G647000LC	TraesCS3A02G647000LC.1	-1203
GCACGSAWHYCGAGG	MEME-1	chr7A	81960528	81960542	-	18.8158	3.56e-07	0.00374	GCACGGGGATCGAGG	0	IP_peak_24656	chr7A	81960375	81960645	271	81960528	16.44	13.7597	24.393	19.6211	Promoter (1-2kb)	chr7A	81954966	81958780	3815	5	-	TraesCS7A02G127800	TraesCS7A02G127800.1	-1748
GCACGSAWHYCGAGG	MEME-1	chr3B	73841165	73841179	+	18.7763	3.67e-07	0.00375	GCGCGAAAATCGAGG	0	IP_peak_10042	chr3B	73840977	73841321	345	73841169	30.29	15.6439	34.3355	29.1112	Promoter (<=1kb)	chr3B	73842159	73850872	8714	5	+	TraesCS3B02G108200	TraesCS3B02G108200.1	-990
GCACGSAWHYCGAGG	MEME-1	chr7A	83068252	83068266	+	18.7763	3.67e-07	0.00375	GCGCGAAAATCGAGG	-54	IP_peak_24660	chr7A	83068140	83068472	333	83068320	17.31	15.6933	29.886	24.8812	Promoter (1-2kb)	chr7A	83066616	83067218	603	1	-	TraesCS7A02G174100LC	TraesCS7A02G174100LC.1	-1102
GCACGSAWHYCGAGG	MEME-1	chr4B	445847526	445847540	-	18.7763	3.67e-07	0.00375	GCGCGAAAATCGAGG	-10	IP_peak_15035	chr4B	445847365	445847791	427	445847550	33.75	20.8199	44.6869	39.0872	Promoter (1-2kb)	chr4B	445843886	445845979	2094	8	-	TraesCS4B02G208600	TraesCS4B02G208600.3	-1571
GCACGSAWHYCGAGG	MEME-1	chr6D	63705488	63705502	+	18.7237	3.83e-07	0.00387	GCGCGGAGCCCGAGG	14	IP_peak_23609	chr6D	63705297	63705557	261	63705474	6.06	6.04984	9.21445	5.3363	Promoter (<=1kb)	chr6D	63706124	63706342	219	1	+	TraesCS6D02G116100LC	TraesCS6D02G116100LC.1	-650
GCACGSAWHYCGAGG	MEME-1	chr7A	121613224	121613238	-	18.7105	3.85e-07	0.00387	GCACGGATCCCGAGA	34	IP_peak_24769	chr7A	121613049	121613333	285	121613190	20.77	13.4008	24.2617	19.4916	Promoter (1-2kb)	chr7A	121611104	121611587	484	2	-	TraesCS7A02G166000	TraesCS7A02G166000.1	-1603
GCACGSAWHYCGAGG	MEME-1	chr3A	58098530	58098544	+	18.6053	4.06e-07	0.00401	GCGCAGATCCCGAGG	0	IP_peak_8353	chr3A	58098357	58098652	296	58098533	32.02	16.5093	37.36	32.0322	Promoter (1-2kb)	chr3A	58100214	58101133	920	1	+	TraesCS3A02G114700LC	TraesCS3A02G114700LC.1	-1681
GCACGSAWHYCGAGG	MEME-1	chr5B	420184390	420184404	+	18.5526	4.22e-07	0.00414	GCGCAGATCTCGAGG	63	IP_peak_18760	chr5B	420184161	420184449	289	420184327	12.12	6.55758	10.1966	6.23501	Promoter (<=1kb)	chr5B	420184783	420193015	8233	3	+	TraesCS5B02G240100	TraesCS5B02G240100.1	-456
GCACGSAWHYCGAGG	MEME-1	chr2B	677217880	677217894	-	18.4342	4.56e-07	0.00433	GCACGCAGTACGAGG	-131	IP_peak_6569	chr2B	677217839	677218075	237	677218025	7.79	7.53345	10.897	6.85299	Promoter (<=1kb)	chr2B	677215307	677217741	2435	2	-	TraesCS2B02G722800LC	TraesCS2B02G722800LC.1	-284
GCACGSAWHYCGAGG	MEME-1	chr3D	605952797	605952811	+	18.4342	4.56e-07	0.00433	GCACGCAGTACGAGG	0	IP_peak_12682	chr3D	605952666	605952951	286	605952798	23.36	12.1825	24.2093	19.4412	Promoter (<=1kb)	chr3D	605953283	605956699	3417	4	+	TraesCS3D02G527400	TraesCS3D02G527400.1	-485
GCACGSAWHYCGAGG	MEME-1	chr1A	132802019	132802033	-	18.3816	4.74e-07	0.00443	GCACGGAAATCAAGG	3	IP_peak_323	chr1A	132801911	132802172	262	132802016	9.52	9.01706	14.4095	10.138	Promoter (1-2kb)	chr1A	132797900	132800842	2943	5	-	TraesCS1A02G120400	TraesCS1A02G120400.1	-1174
GCACGSAWHYCGAGG	MEME-1	chr1D	173050233	173050247	-	18.3816	4.74e-07	0.00443	GCACGGAAATCAAGG	-4	IP_peak_2924	chr1D	173050163	173050394	232	173050251	6.92	5.01503	5.57871	2.39581	Promoter (1-2kb)	chr1D	173048771	173049193	423	1	-	TraesCS1D02G198600LC	TraesCS1D02G198600LC.1	-1058
GCACGSAWHYCGAGG	MEME-1	chr3B	28152594	28152608	+	18.3158	4.97e-07	0.0046	GCACACATTACGAGG	3	IP_peak_9932	chr3B	28152442	28152753	312	28152591	10.38	9.75887	16.2298	11.8542	Promoter (1-2kb)	chr3B	28151051	28151440	390	1	-	TraesCS3B02G061500LC	TraesCS3B02G061500LC.1	-1151
GCACGSAWHYCGAGG	MEME-1	chr4A	616146464	616146478	+	18.1447	5.5e-07	0.00492	GCACGCTTCCCGATG	0	IP_peak_13967	chr4A	616146286	616146748	463	616146472	32.02	22.834	48.6977	42.8889	Promoter (1-2kb)	chr4A	616143205	616145331	2127	5	-	TraesCS4A02G492600LC	TraesCS4A02G492600LC.1	-1141
GCACGSAWHYCGAGG	MEME-1	chr2D	30745332	30745346	-	18.1316	5.53e-07	0.00495	GCACGCATCTCAAGG	-55	IP_peak_7000	chr2D	30745265	30745546	282	30745401	7.79	6.93294	9.28856	5.40112	Promoter (<=1kb)	chr2D	30745694	30749892	4199	8	+	TraesCS2D02G073400	TraesCS2D02G073400.1	-293
GCACGSAWHYCGAGG	MEME-1	chr6B	681146937	681146951	-	18.1184	5.56e-07	0.00497	ACACGGATCCCGAGG	2	IP_peak_23272	chr6B	681146792	681147181	390	681146935	19.9	17.7387	33.4314	28.3025	Promoter (<=1kb)	chr6B	681145921	681146034	114	1	-	TraesCS6B02G735400LC	TraesCS6B02G735400LC.1	-901
GCACGSAWHYCGAGG	MEME-1	chr6A	250720804	250720818	-	18.0395	5.82e-07	0.00516	GCACAAATCACGAGG	-24	IP_peak_21241	chr6A	250720754	250721009	256	250720842	10.38	9.75887	16.2298	11.8542	Promoter (1-2kb)	chr6A	250718832	250719413	582	1	-	TraesCS6A02G293100LC	TraesCS6A02G293100LC.1	-1429
GCACGSAWHYCGAGG	MEME-1	chr4D	350250466	350250480	-	17.9474	6.16e-07	0.00528	GCACGAAGTACGAGG	-13	IP_peak_16070	chr4D	350250376	350250616	241	350250493	15.58	8.28831	13.7287	9.50863	Promoter (<=1kb)	chr4D	350247019	350249774	2756	5	-	TraesCS4D02G203300	TraesCS4D02G203300.1	-719
GCACGSAWHYCGAGG	MEME-1	chr1A	553535092	553535106	-	17.8947	6.34e-07	0.00528	GCACAATTTTCGAGG	0	IP_peak_1135	chr1A	553534972	553535226	255	553535100	8.65	6.47623	8.53429	4.82236	Promoter (<=1kb)	chr1A	553535726	553542082	6357	15	+	TraesCS1A02G382800	TraesCS1A02G382800.1	-626
GCACGSAWHYCGAGG	MEME-1	chr6B	234233401	234233415	+	17.8684	6.4e-07	0.00528	GCACGCGGATCGAGG	37	IP_peak_22551	chr6B	234233220	234233447	228	234233364	11.25	10.5007	18.0879	13.6263	Promoter (1-2kb)	chr6B	234235293	234235757	465	1	+	TraesCS6B02G307100LC	TraesCS6B02G307100LC.1	-1929
GCACGSAWHYCGAGG	MEME-1	chr1B	107371931	107371945	+	17.8421	6.49e-07	0.00532	GCACGCCAACCGAGG	-15	IP_peak_1531	chr1B	107371850	107372080	231	107371960	9.52	6.30244	8.56867	4.84706	Promoter (<=1kb)	chr1B	107370141	107370973	833	1	-	TraesCS1B02G099900	TraesCS1B02G099900.1	-987
GCACGSAWHYCGAGG	MEME-1	chr7A	123180127	123180141	-	17.8289	6.57e-07	0.00537	GCACACAAAACGAGG	0	IP_peak_24776	chr7A	123180048	123180291	244	123180131	6.06	6.04984	9.21445	5.3363	Promoter (1-2kb)	chr7A	123176259	123178994	2736	4	-	TraesCS7A02G226600LC	TraesCS7A02G226600LC.1	-1137
GCACGSAWHYCGAGG	MEME-1	chr5B	231728318	231728332	+	17.6053	7.29e-07	0.00581	GCGCACATCTCGAGG	0	IP_peak_18392	chr5B	231728191	231728508	318	231728325	16.44	13.7597	24.393	19.6211	Promoter (<=1kb)	chr5B	231728727	231733238	4512	5	+	TraesCS5B02G126700	TraesCS5B02G126700.1	-402
GCACGSAWHYCGAGG	MEME-1	chr2B	53082997	53083011	-	17.5921	7.33e-07	0.00584	GCACACAACACGAGG	-23	IP_peak_5401	chr2B	53082904	53083144	241	53083034	10.38	9.30849	14.8582	10.5656	Promoter (1-2kb)	chr2B	53084529	53085822	1294	2	+	TraesCS2B02G092200	TraesCS2B02G092200.1	-1495
GCACGSAWHYCGAGG	MEME-1	chr1D	425297745	425297759	+	17.5526	7.48e-07	0.00593	GCGCGGGAACCGAGG	122	IP_peak_3353	chr1D	425297451	425297791	341	425297623	11.25	9.66363	15.6574	11.3383	Promoter (1-2kb)	chr1D	425299621	425300562	942	1	+	TraesCS1D02G335300	TraesCS1D02G335300.1	-1998
GCACGSAWHYCGAGG	MEME-1	chr7D	633601589	633601603	-	17.5395	7.56e-07	0.00598	GCACGAATCACGATG	12	IP_peak_28978	chr7D	633601437	633601735	299	633601577	12.98	6.99026	10.1966	6.23501	Promoter (<=1kb)	chr7D	633602394	633608171	5778	11	+	TraesCS7D02G548000	TraesCS7D02G548000.1	-817
GCACGSAWHYCGAGG	MEME-1	chr1B	597547106	597547120	+	17.5395	7.56e-07	0.00598	GCACGAATCACGATG	-1	IP_peak_2346	chr1B	597547031	597547259	229	597547121	16.44	8.721	14.9606	10.6567	Promoter (<=1kb)	chr1B	597547681	597552022	4342	7	+	TraesCS1B02G366600	TraesCS1B02G366600.1	-560
GCACGSAWHYCGAGG	MEME-1	chr6D	466787329	466787343	-	17.4868	7.8e-07	0.00605	GCACGAATTCCAAGG	-3	IP_peak_24349	chr6D	466787199	466787518	320	466787346	17.31	9.7913	17.2546	12.8585	Promoter (<=1kb)	chr6D	466788121	466788738	618	2	+	TraesCS6D02G507500LC	TraesCS6D02G507500LC.1	-775
GCACGSAWHYCGAGG	MEME-1	chr2D	473439554	473439568	-	17.4737	7.88e-07	0.00605	GCGCGAAGATCGAGG	0	IP_peak_7800	chr2D	473439418	473439737	320	473439558	29.42	10.1408	24.2325	19.4625	Promoter (1-2kb)	chr2D	473433646	473437909	4264	4	-	TraesCS2D02G369200	TraesCS2D02G369200.2	-1649
GCACGSAWHYCGAGG	MEME-1	chr3B	705137280	705137294	-	17.4737	7.88e-07	0.00605	GCACATATCCCGAGG	0	IP_peak_11050	chr3B	705137104	705137535	432	705137288	32.88	27.7053	58.5377	52.3656	Promoter (<=1kb)	chr3B	705137996	705138310	315	1	+	TraesCS3B02G668800LC	TraesCS3B02G668800LC.1	-708
GCACGSAWHYCGAGG	MEME-1	chr7B	323843446	323843460	+	17.4737	7.88e-07	0.00605	GCACGGATGTCGAGG	0	IP_peak_26669	chr7B	323843286	323843639	354	323843450	16.44	12.062	20.6947	16.0782	Promoter (<=1kb)	chr7B	323839695	323842641	2947	3	-	TraesCS7B02G334500LC	TraesCS7B02G334500LC.1	-809
GCACGSAWHYCGAGG	MEME-1	chr2B	724732037	724732051	+	17.4737	7.88e-07	0.00605	GCGCGAAGATCGAGG	0	IP_peak_6663	chr2B	724731928	724732201	274	724732043	12.98	11.029	17.3444	12.9446	Promoter (1-2kb)	chr2B	724733059	724733256	198	1	+	TraesCS2B02G786000LC	TraesCS2B02G786000LC.1	-1016
GCACGSAWHYCGAGG	MEME-1	chr6D	427572101	427572115	+	17.3421	8.53e-07	0.00642	GCGCGCATATCGATG	0	IP_peak_24201	chr6D	427571958	427572219	262	427572102	15.58	8.28831	13.7287	9.50863	Promoter (1-2kb)	chr6D	427567925	427570892	2968	1	-	TraesCS6D02G319700	TraesCS6D02G319700.1	-1210
GCACGSAWHYCGAGG	MEME-1	chr5A	502366639	502366653	+	17.3026	8.76e-07	0.00656	GCGCGCGTCCCGAGG	0	IP_peak_17448	chr5A	502366505	502366834	330	502366651	22.5	17.9082	34.1698	28.9537	Promoter (<=1kb)	chr5A	502367262	502369181	1920	2	+	TraesCS5A02G291700	TraesCS5A02G291700.1	-611
GCACGSAWHYCGAGG	MEME-1	chr5A	608314127	608314141	+	17.1711	9.38e-07	0.00698	GCACAATACTCGAGG	0	IP_peak_17706	chr5A	608313802	608314375	574	608314139	14.71	13.3326	23.4178	18.7038	Promoter (1-2kb)	chr5A	608312562	608312912	351	1	-	TraesCS5A02G577000LC	TraesCS5A02G577000LC.1	-1227
GCACGSAWHYCGAGG	MEME-1	chr3D	319515709	319515723	+	17.1184	9.7e-07	0.00718	GCACGCTCATCGAGG	0	IP_peak_12000	chr3D	319515602	319515883	282	319515714	14.71	5.23709	8.41215	4.70692	Promoter (<=1kb)	chr3D	319516061	319516348	288	1	+	TraesCS3D02G319500LC	TraesCS3D02G319500LC.1	-347
GCACGSAWHYCGAGG	MEME-1	chr1B	502053074	502053088	-	17.1053	9.77e-07	0.00722	GCGCGCATCTCGATG	4	IP_peak_2134	chr1B	502052948	502053247	300	502053070	8.65	6.88847	9.28392	5.40077	Promoter (1-2kb)	chr1B	502051277	502051639	363	1	-	TraesCS1B02G511300LC	TraesCS1B02G511300LC.1	-1431
GCACGSAWHYCGAGG	MEME-1	chr2D	426945245	426945259	-	16.9342	1.08e-06	0.00779	GCACAAATCCCGATG	0	IP_peak_7723	chr2D	426945034	426945402	369	426945247	15.58	14.0669	25.3707	20.5846	Promoter (<=1kb)	chr2D	426942279	426945164	2886	1	-	TraesCS2D02G431400LC	TraesCS2D02G431400LC.1	-83
GCACGSAWHYCGAGG	MEME-1	chr5B	655435	655449	-	16.8026	1.17e-06	0.00829	GCACGGTAACCAAGG	-45	IP_peak_17994	chr5B	655333	655575	243	655494	19.04	10.0191	18.7993	14.3011	Promoter (<=1kb)	chr5B	655691	658663	2973	1	+	TraesCS5B02G000700LC	TraesCS5B02G000700LC.1	-197
GCACGSAWHYCGAGG	MEME-1	chr5B	62047163	62047177	+	16.7763	1.17e-06	0.00832	GCACATAAACCGAGG	0	IP_peak_18136	chr5B	62047028	62047276	249	62047166	18.17	6.39091	12.1886	8.07969	Promoter (1-2kb)	chr5B	62044676	62045200	525	1	-	TraesCS5B02G085500LC	TraesCS5B02G085500LC.1	-1966
GCACGSAWHYCGAGG	MEME-1	chr1A	208728648	208728662	+	16.7763	1.17e-06	0.00832	GCACAGATCCCAAGG	-43	IP_peak_432	chr1A	208728515	208728881	367	208728705	15.58	14.2097	25.8431	20.9975	Promoter (1-2kb)	chr1A	208726723	208727613	891	2	-	TraesCS1A02G214100LC	TraesCS1A02G214100LC.1	-1092
GCACGSAWHYCGAGG	MEME-1	chr3B	705356909	705356923	+	16.7763	1.17e-06	0.00832	GCACAGATCCCAAGG	0	IP_peak_11053	chr3B	705356819	705357090	272	705356920	12.98	11.9843	19.9806	15.3886	Promoter (<=1kb)	chr3B	705355965	705356559	595	3	-	TraesCS3B02G669000LC	TraesCS3B02G669000LC.1	-361
GCACGSAWHYCGAGG	MEME-1	chr2B	259775180	259775194	+	16.7632	1.18e-06	0.00838	GCGCAGTTTCCGAGG	-1	IP_peak_5851	chr2B	259775071	259775316	246	259775195	14.71	7.85563	12.5229	8.39108	Promoter (<=1kb)	chr2B	259776070	259781435	5366	12	+	TraesCS2B02G250300	TraesCS2B02G250300.1	-875
GCACGSAWHYCGAGG	MEME-1	chr7D	432938440	432938454	+	16.7632	1.18e-06	0.00838	GCGCAGTTTCCGAGG	-10	IP_peak_28412	chr7D	432938333	432938614	282	432938464	18.17	11.6428	20.9478	16.326	Promoter (<=1kb)	chr7D	432938836	432943029	4194	2	+	TraesCS7D02G338800	TraesCS7D02G338800.1	-372
GCACGSAWHYCGAGG	MEME-1	chr4D	208423773	208423787	-	16.6053	1.27e-06	0.00882	GCACGCACTACGAGG	0	IP_peak_15902	chr4D	208423621	208423948	328	208423786	24.23	13.3348	26.8031	21.9467	Promoter (1-2kb)	chr4D	208379393	208422081	42689	18	-	TraesCS4D02G155700	TraesCS4D02G155700.1	-1705
GCACGSAWHYCGAGG	MEME-1	chr2B	104231170	104231184	-	16.5789	1.29e-06	0.00886	GCACGCATGCCGAGG	15	IP_peak_5518	chr2B	104231000	104231327	328	104231155	16.44	10.4503	17.7925	13.369	Promoter (1-2kb)	chr2B	104232810	104237615	4806	21	+	TraesCS2B02G137300	TraesCS2B02G137300.1	-1655
GCACGSAWHYCGAGG	MEME-1	chr3A	581865975	581865989	+	16.5789	1.29e-06	0.00886	GCACGCATGCCGAGG	0	IP_peak_9267	chr3A	581865813	581866071	259	581865979	12.12	6.93168	10.7981	6.79844	Promoter (1-2kb)	chr3A	581863296	581864941	1646	2	-	TraesCS3A02G470900LC	TraesCS3A02G470900LC.1	-1038
GCACGSAWHYCGAGG	MEME-1	chr6B	166136225	166136239	-	16.5526	1.31e-06	0.00886	GCACGAAATCCAAGG	0	IP_peak_22452	chr6B	166136065	166136349	285	166136239	17.31	7.14823	12.9655	8.78868	Promoter (<=1kb)	chr6B	166120121	166135701	15581	22	-	TraesCS6B02G161800	TraesCS6B02G161800.5	-538
GCACGSAWHYCGAGG	MEME-1	chr1A	403625890	403625904	-	16.5526	1.31e-06	0.00886	GCTCGAATATCGAGG	113	IP_peak_768	chr1A	403625687	403625909	223	403625777	5.19	5.30804	7.58964	3.97097	Promoter (<=1kb)	chr1A	403625030	403625422	393	1	-	TraesCS1A02G364600LC	TraesCS1A02G364600LC.1	-355
GCACGSAWHYCGAGG	MEME-1	chr5A	495559840	495559854	-	16.5526	1.31e-06	0.00886	GCTCGAATATCGAGG	163	IP_peak_17434	chr5A	495559614	495559862	249	495559677	5.19	5.25471	7.4151	3.8892	Promoter (<=1kb)	chr5A	495555085	495559401	4317	3	-	TraesCS5A02G415600LC	TraesCS5A02G415600LC.1	-276
GCACGSAWHYCGAGG	MEME-1	chr1D	321640223	321640237	+	16.5526	1.31e-06	0.00886	GCTCGAATATCGAGG	-143	IP_peak_3135	chr1D	321640199	321640425	227	321640380	4.33	4.56623	6.03134	2.69714	Promoter (<=1kb)	chr1D	321640628	321641082	455	1	+	TraesCS1D02G233000	TraesCS1D02G233000.1	-248
GCACGSAWHYCGAGG	MEME-1	chr6B	123458153	123458167	-	16.5395	1.31e-06	0.00886	GCACGGAAGTCGAGG	0	IP_peak_22346	chr6B	123458023	123458337	315	123458167	16.44	14.9515	27.8522	22.9232	Promoter (1-2kb)	chr6B	123456061	123456852	792	1	-	TraesCS6B02G127557	TraesCS6B02G127557.1	-1315
GCACGSAWHYCGAGG	MEME-1	chr2D	67238540	67238554	+	16.5263	1.32e-06	0.00891	GCACGCATGTCGAGG	0	IP_peak_7107	chr2D	67238467	67238810	344	67238553	13.85	7.42295	11.3449	7.27452	Promoter (<=1kb)	chr2D	67233189	67237902	4714	21	-	TraesCS2D02G117900	TraesCS2D02G117900.1	-651
GCACGSAWHYCGAGG	MEME-1	chr5A	36668164	36668178	-	16.4737	1.35e-06	0.00905	GCGCGGTTCCCGATG	-8	IP_peak_16595	chr5A	36668093	36668315	223	36668186	15.58	8.28831	13.7287	9.50863	Promoter (<=1kb)	chr5A	36666971	36667210	240	1	-	TraesCS5A02G060600LC	TraesCS5A02G060600LC.1	-976
GCACGSAWHYCGAGG	MEME-1	chr4A	290381658	290381672	-	16.4737	1.35e-06	0.00905	GCGCGGTTCCCGATG	0	IP_peak_13276	chr4A	290381517	290381853	337	290381670	23.36	20.6761	41.8329	36.336	Promoter (1-2kb)	chr4A	290379289	290380223	935	2	-	TraesCS4A02G212400LC	TraesCS4A02G212400LC.1	-1447
GCACGSAWHYCGAGG	MEME-1	chr3D	434030820	434030834	-	16.4211	1.39e-06	0.00922	GCGCAAAAATCGAGG	0	IP_peak_12210	chr3D	434030700	434031075	376	434030827	11.25	6.12489	9.08008	5.30512	Promoter (<=1kb)	chr3D	434025102	434030174	5073	5	-	TraesCS3D02G321300	TraesCS3D02G321300.1	-653
GCACGSAWHYCGAGG	MEME-1	chr6D	346076269	346076283	-	16.3684	1.43e-06	0.00945	GCTCGAATCCCGAGG	5	IP_peak_24033	chr6D	346076109	346076462	354	346076264	37.21	20.1954	46.9809	41.2056	Promoter (<=1kb)	chr6D	346073637	346075408	1772	2	-	TraesCS6D02G243700	TraesCS6D02G243700.1	-856
GCACGSAWHYCGAGG	MEME-1	chr7A	134734511	134734525	+	16.3553	1.44e-06	0.00945	GCACAGATCCCGAGA	-46	IP_peak_24805	chr7A	134734479	134734703	225	134734571	19.9	10.4517	18.7993	14.3011	Promoter (1-2kb)	chr7A	134733077	134733307	231	1	-	TraesCS7A02G238800LC	TraesCS7A02G238800LC.1	-1264
GCACGSAWHYCGAGG	MEME-1	chr5A	338407153	338407167	+	16.25	1.51e-06	0.0096	GCGCGGATTTCAAGG	0	IP_peak_17091	chr5A	338406954	338407254	301	338407160	12.12	11.2425	19.9806	15.3886	Promoter (<=1kb)	chr5A	338407884	338408587	704	2	+	TraesCS5A02G270500LC	TraesCS5A02G270500LC.1	-724
GCACGSAWHYCGAGG	MEME-1	chr3B	793343198	793343212	-	16.2368	1.52e-06	0.00964	GCACGATCTCCGAGG	0	IP_peak_11290	chr3B	793343058	793343353	296	793343204	22.5	12.1341	23.4556	18.7416	Promoter (1-2kb)	chr3B	793345156	793345785	630	1	+	TraesCS3B02G829100LC	TraesCS3B02G829100LC.1	-1952
GCACGSAWHYCGAGG	MEME-1	chr3D	419589411	419589425	-	16.2237	1.53e-06	0.00968	GCACGGATCTCAATG	-2	IP_peak_12184	chr3D	419589226	419589588	363	419589427	18.17	9.58637	17.4972	13.0844	Promoter (<=1kb)	chr3D	419587047	419588897	1851	2	-	TraesCS3D02G305600	TraesCS3D02G305600.2	-530
GCACGSAWHYCGAGG	MEME-1	chr1A	544486416	544486430	-	16.2237	1.53e-06	0.00968	GCACGGATCTCAATG	0	IP_peak_1096	chr1A	544486276	544486611	336	544486429	17.31	6.10245	11.2084	7.14904	Promoter (<=1kb)	chr1A	544486925	544489217	2293	8	+	TraesCS1A02G365200	TraesCS1A02G365200.1	-496
GCACGSAWHYCGAGG	MEME-1	chr6A	524371442	524371456	+	16.2237	1.53e-06	0.00968	GCACGGATCTCAATG	41	IP_peak_21824	chr6A	524371274	524371515	242	524371401	15.58	8.76116	14.4784	10.2055	Promoter (<=1kb)	chr6A	524371518	524371679	162	1	+	TraesCS6A02G293000	TraesCS6A02G293000.1	-117
GCACGSAWHYCGAGG	MEME-1	chr3A	457749087	457749101	-	16.1974	1.54e-06	0.00972	GCGCGGGGATCGAGG	0	IP_peak_9021	chr3A	457748846	457749258	413	457749099	12.98	11.4312	18.3558	13.8815	Promoter (<=1kb)	chr3A	457748180	457748407	228	1	-	TraesCS3A02G369300LC	TraesCS3A02G369300LC.1	-692
GCACGSAWHYCGAGG	MEME-1	chr4B	667418991	667419005	+	16.1842	1.56e-06	0.0098	GCACAAAAATCGATG	8	IP_peak_15538	chr4B	667418882	667419120	239	667418983	15.58	5.52554	9.31879	5.42768	Promoter (1-2kb)	chr4B	667415615	667417891	2277	3	-	TraesCS4B02G391800	TraesCS4B02G391800.4	-1092
GCACGSAWHYCGAGG	MEME-1	chr6A	555218840	555218854	-	16.1711	1.57e-06	0.00983	GCTCGGTTCCCGAGG	0	IP_peak_21886	chr6A	555218713	555218988	276	555218842	18.17	11.4872	20.6773	16.0644	Promoter (<=1kb)	chr6A	555219266	555229863	10598	7	+	TraesCS6A02G319900	TraesCS6A02G319900.1	-424
GCACGSAWHYCGAGG	MEME-1	chr6B	615964081	615964095	-	16.1711	1.57e-06	0.00983	GCTCGGTTCCCGAGG	0	IP_peak_23136	chr6B	615963906	615964204	299	615964092	11.25	9.33516	14.8719	10.5776	Promoter (<=1kb)	chr6B	615964852	615971424	6573	8	+	TraesCS6B02G350700	TraesCS6B02G350700.1	-760
GCACGSAWHYCGAGG	MEME-1	chr3D	584732875	584732889	-	16.1447	1.59e-06	0.00997	GCACAGATTCCGAGA	26	IP_peak_12572	chr3D	584732749	584732975	227	584732849	10.38	9.75887	16.2298	11.8542	Promoter (1-2kb)	chr3D	584734723	584735400	678	1	+	TraesCS3D02G598500LC	TraesCS3D02G598500LC.1	-1874
GCACGSAWHYCGAGG	MEME-1	chr4B	13087922	13087936	-	16.1053	1.63e-06	0.0101	GCTCGAATTTCGAGG	0	IP_peak_14340	chr4B	13087730	13088090	361	13087936	13.85	9.67011	14.9575	10.6567	Promoter (<=1kb)	chr4B	13088380	13093630	5251	11	+	TraesCS4B02G017700	TraesCS4B02G017700.1	-444
GCACGSAWHYCGAGG	MEME-1	chr3B	41315735	41315749	-	16.1053	1.63e-06	0.0101	GCTCGAATTTCGAGG	65	IP_peak_9963	chr3B	41315564	41315801	238	41315670	6.92	5.65349	6.6293	3.20911	Promoter (<=1kb)	chr3B	41315050	41315437	388	2	-	TraesCS3B02G083100LC	TraesCS3B02G083100LC.1	-233
GCACGSAWHYCGAGG	MEME-1	chr2A	173360337	173360351	-	16.1053	1.63e-06	0.0101	GCTCGAATTTCGAGG	141	IP_peak_4027	chr2A	173360053	173360356	304	173360196	7.79	6.27098	7.93129	4.28499	Promoter (<=1kb)	chr2A	173355622	173359608	3987	3	-	TraesCS2A02G200400	TraesCS2A02G200400.1	-588
GCACGSAWHYCGAGG	MEME-1	chr2B	638961361	638961375	-	16.1053	1.63e-06	0.0101	GCTCGAATTTCGAGG	0	IP_peak_6472	chr2B	638961238	638961560	323	638961371	22.5	11.7498	22.8283	18.1251	Promoter (1-2kb)	chr2B	638962767	638968572	5806	15	+	TraesCS2B02G446000	TraesCS2B02G446000.1	-1396
GCACGSAWHYCGAGG	MEME-1	chr1A	7654420	7654434	+	16.1053	1.63e-06	0.0101	GCTCGAATTTCGAGG	0	IP_peak_19	chr1A	7654277	7654652	376	7654434	20.77	13.0427	23.651	18.9345	Promoter (<=1kb)	chr1A	7651464	7654123	2660	7	-	TraesCS1A02G013700	TraesCS1A02G013700.1	-311
GCACGSAWHYCGAGG	MEME-1	chr7A	63723492	63723506	+	16.1053	1.63e-06	0.0101	GCTCGAATTTCGAGG	-1	IP_peak_24605	chr7A	63723368	63723658	291	63723507	32.88	16.942	37.36	32.0322	Promoter (<=1kb)	chr7A	63723672	63725358	1687	1	+	TraesCS7A02G104900	TraesCS7A02G104900.1	-165
GCACGSAWHYCGAGG	MEME-1	chr1B	266944229	266944243	+	16.1053	1.63e-06	0.0101	GCTCGAATTTCGAGG	-166	IP_peak_1745	chr1B	266944187	266944454	268	266944409	11.25	7.75382	11.7527	7.65822	Promoter (<=1kb)	chr1B	266943100	266943729	630	1	-	TraesCS1B02G293500LC	TraesCS1B02G293500LC.1	-680
GCACGSAWHYCGAGG	MEME-1	chr3B	791658935	791658949	+	16.1053	1.63e-06	0.0101	GCTCGAATTTCGAGG	5	IP_peak_11279	chr3B	791658873	791659145	273	791658930	7.79	7.53345	10.897	6.85299	Promoter (<=1kb)	chr3B	791659156	791665971	6816	10	+	TraesCS3B02G557500	TraesCS3B02G557500.1	-226
GCACGSAWHYCGAGG	MEME-1	chr7B	50976185	50976199	-	16.0921	1.64e-06	0.0102	GCACGACTTACGAGG	-128	IP_peak_26190	chr7B	50976143	50976497	355	50976327	7.79	7.18578	9.90484	5.97593	Promoter (<=1kb)	chr7B	50974025	50976177	2153	2	-	TraesCS7B02G083400LC	TraesCS7B02G083400LC.1	-150
GCACGSAWHYCGAGG	MEME-1	chrUn	103461681	103461695	-	16.0658	1.67e-06	0.0102	GCGCGAGAATCGAGG	0	IP_peak_29226	chrUn	103461190	103461830	641	103461684	35.48	13.1029	33.2727	28.1545	Promoter (1-2kb)	chrUn	103463078	103463380	303	1	+	TraesCSU02G198100LC	TraesCSU02G198100LC.1	-1394
GCACGSAWHYCGAGG	MEME-1	chr7D	441733974	441733988	-	16.0658	1.67e-06	0.0102	GCGCGAGAATCGAGG	-44	IP_peak_28428	chr7D	441733920	441734162	243	441734032	9.52	8.92646	14.1159	9.88405	Promoter (1-2kb)	chr7D	441735523	441736045	523	3	+	TraesCS7D02G465600LC	TraesCS7D02G465600LC.1	-1491
GCACGSAWHYCGAGG	MEME-1	chr2D	390389384	390389398	+	16.0658	1.67e-06	0.0102	GCGCGAGAATCGAGG	-44	IP_peak_7657	chr2D	390389330	390389624	295	390389442	15.58	14.2097	25.8431	20.9975	Promoter (1-2kb)	chr2D	390387848	390388198	351	1	-	TraesCS2D02G399200LC	TraesCS2D02G399200LC.1	-1244
GCACGSAWHYCGAGG	MEME-1	chr7D	254977053	254977067	+	16.0526	1.67e-06	0.0102	GCGTGGATTTCGAGG	6	IP_peak_28168	chr7D	254976900	254977203	304	254977047	28.56	13.9745	30.0426	25.026	Promoter (1-2kb)	chr7D	254978243	254984520	6278	4	+	TraesCS7D02G269800	TraesCS7D02G269800.1	-1196
GCACGSAWHYCGAGG	MEME-1	chr1A	100267025	100267039	-	16.0263	1.7e-06	0.0103	GCGCAAAATCCGAGG	-120	IP_peak_261	chr1A	100266959	100267303	345	100267159	16.44	13.7597	24.393	19.6211	Promoter (<=1kb)	chr1A	100267212	100272922	5711	2	+	TraesCS1A02G104500	TraesCS1A02G104500.1	-53
GCACGSAWHYCGAGG	MEME-1	chr2A	43203621	43203635	-	15.8421	1.86e-06	0.011	GCACGAATCCCGAAG	83	IP_peak_3766	chr2A	43203454	43203681	228	43203538	12.98	6.99026	10.1966	6.23501	Promoter (<=1kb)	chr2A	43202544	43202927	384	1	-	TraesCS2A02G088200LC	TraesCS2A02G088200LC.1	-611
GCACGSAWHYCGAGG	MEME-1	chr6B	55335869	55335883	+	15.75	1.94e-06	0.0114	GCGCAGATCCCGATG	0	IP_peak_22219	chr6B	55335690	55336008	319	55335870	46.73	11.9325	38.2629	32.8767	Promoter (<=1kb)	chr6B	55336203	55338111	1909	1	+	TraesCS6B02G078800	TraesCS6B02G078800.1	-333
GCACGSAWHYCGAGG	MEME-1	chr4D	97473233	97473247	+	15.7368	1.95e-06	0.0115	GCACGCAGTCCAAGG	0	IP_peak_15775	chr4D	97473078	97473355	278	97473243	24.23	12.6151	25.6079	20.8051	Promoter (1-2kb)	chr4D	97471485	97471706	222	1	-	TraesCS4D02G115500LC	TraesCS4D02G115500LC.1	-1537
GCACGSAWHYCGAGG	MEME-1	chr4D	301592147	301592161	+	15.6842	2e-06	0.0116	GCACGCCTCCCGATG	-93	IP_peak_16014	chr4D	301592073	301592367	295	301592254	7.79	7.53345	10.897	6.85299	Promoter (1-2kb)	chr4D	301594140	301594442	303	1	+	TraesCS4D02G256600LC	TraesCS4D02G256600LC.1	-1886
GCACGSAWHYCGAGG	MEME-1	chr5B	360556380	360556394	+	15.6842	2e-06	0.0116	GCACGCCTCCCGATG	0	IP_peak_18632	chr5B	360556276	360556520	245	360556390	7.79	7.45776	10.6629	6.6728	Promoter (1-2kb)	chr5B	360558081	360563202	5122	2	+	TraesCS5B02G331000LC	TraesCS5B02G331000LC.1	-1691
GCACGSAWHYCGAGG	MEME-1	chrUn	82532383	82532397	+	15.6447	2.05e-06	0.0118	GCACGATTCCCGAGA	0	IP_peak_29160	chrUn	82532277	82532600	324	82532386	32.02	8.25465	22.4566	17.7659	Promoter (<=1kb)	chrUn	82523784	82532301	8518	13	-	TraesCSU02G093100	TraesCSU02G093100.1	-85
GCACGSAWHYCGAGG	MEME-1	chr1B	19063570	19063584	-	15.6184	2.07e-06	0.0119	GCGTGGAAACCGAGG	1	IP_peak_1330	chr1B	19063382	19063691	310	19063569	9.52	8.92646	14.1159	9.88405	Promoter (1-2kb)	chr1B	19061029	19062117	1089	1	-	TraesCS1B02G039625	TraesCS1B02G039625.1	-1452
GCACGSAWHYCGAGG	MEME-1	chr5A	550641500	550641514	-	15.5789	2.12e-06	0.0121	GCACGGAAACCAATG	0	IP_peak_17572	chr5A	550641388	550641706	319	550641504	13.85	7.42295	11.3449	7.27452	Promoter (<=1kb)	chr5A	550641885	550646810	4926	9	+	TraesCS5A02G347600	TraesCS5A02G347600.1	-381
GCACGSAWHYCGAGG	MEME-1	chr2D	47992756	47992770	-	15.5263	2.17e-06	0.0123	GCACGTTTATCGATG	0	IP_peak_7055	chr2D	47992636	47992874	239	47992759	18.17	6.39091	12.1886	8.07969	Promoter (1-2kb)	chr2D	47990563	47990865	303	1	-	TraesCS2D02G104100LC	TraesCS2D02G104100LC.1	-1894
GCACGSAWHYCGAGG	MEME-1	chr5D	277270819	277270833	-	15.5263	2.17e-06	0.0123	GCGCGCTTCCCGATG	0	IP_peak_19897	chr5D	277270592	277271017	426	277270825	19.9	12.5242	22.1535	17.4699	Promoter (<=1kb)	chr5D	277266801	277270228	3428	6	-	TraesCS5D02G177600	TraesCS5D02G177600.2	-597
GCACGSAWHYCGAGG	MEME-1	chr3D	85275718	85275732	-	15.5132	2.18e-06	0.0123	GCACACGGATCGAGG	-4	IP_peak_11686	chr3D	85275639	85275870	232	85275736	9.52	9.01706	14.4095	10.138	Promoter (1-2kb)	chr3D	85274334	85274693	360	1	-	TraesCS3D02G143200LC	TraesCS3D02G143200LC.1	-1043
GCACGSAWHYCGAGG	MEME-1	chr6B	225858784	225858798	+	15.5	2.19e-06	0.0123	GCACGGTGACCAAGG	10	IP_peak_22543	chr6B	225858634	225858879	246	225858774	12.12	6.55758	10.1966	6.23501	Promoter (<=1kb)	chr6B	225854410	225857875	3466	4	-	TraesCS6B02G300100LC	TraesCS6B02G300100LC.1	-899
GCACGSAWHYCGAGG	MEME-1	chr7D	508792498	508792512	+	15.5	2.19e-06	0.0123	GCACGGTGACCAAGG	52	IP_peak_28584	chr7D	508792279	508792557	279	508792446	13.85	7.42295	11.3449	7.27452	Promoter (1-2kb)	chr7D	508793669	508794061	393	1	+	TraesCS7D02G393400	TraesCS7D02G393400.1	-1223
GCACGSAWHYCGAGG	MEME-1	chr7D	162628393	162628407	+	15.4474	2.25e-06	0.0126	GCACGGTGATCAAGG	-11	IP_peak_28013	chr7D	162628321	162628665	345	162628418	7.79	5.33678	6.36841	2.97687	Promoter (<=1kb)	chr7D	162629030	162629771	742	1	+	TraesCS7D02G204700	TraesCS7D02G204700.1	-612
GCACGSAWHYCGAGG	MEME-1	chr2D	470544566	470544580	+	15.4474	2.25e-06	0.0126	GCACGGTGATCAAGG	107	IP_peak_7787	chr2D	470544219	470544704	486	470544459	6.06	5.77064	8.34871	4.64755	Promoter (1-2kb)	chr2D	470542095	470543367	1273	2	-	TraesCS2D02G366000	TraesCS2D02G366000.2	-1092
GCACGSAWHYCGAGG	MEME-1	chr2A	713323061	713323075	-	15.4474	2.25e-06	0.0126	GCACGCACTTCGATG	0	IP_peak_4963	chr2A	713322920	713323218	299	713323074	30.29	10.4293	25.4237	20.6357	Promoter (1-2kb)	chr2A	713321720	713321911	192	1	-	TraesCS2A02G629400LC	TraesCS2A02G629400LC.1	-1163
GCACGSAWHYCGAGG	MEME-1	chr2A	607603866	607603880	+	15.4079	2.3e-06	0.0128	GCACACATCCCGAGA	-82	IP_peak_4703	chr2A	607603791	607604084	294	607603962	20.77	10.8844	20.1225	15.5203	Promoter (1-2kb)	chr2A	607601226	607602449	1224	1	-	TraesCS2A02G363400	TraesCS2A02G363400.1	-1513
GCACGSAWHYCGAGG	MEME-1	chr4D	391490697	391490711	+	15.3553	2.36e-06	0.0131	GCACACATCTCGAGA	0	IP_peak_16141	chr4D	391490573	391490797	225	391490707	11.25	6.39889	9.51253	5.61655	Promoter (<=1kb)	chr4D	391490931	391493114	2184	9	+	TraesCS4D02G231700	TraesCS4D02G231700.1	-224
GCACGSAWHYCGAGG	MEME-1	chr5B	572857267	572857281	-	15.3553	2.36e-06	0.0131	GCTCGGAAAACGAGG	-1	IP_peak_19059	chr5B	572857038	572857466	429	572857282	35.48	18.2401	41.9929	36.4882	Promoter (1-2kb)	chr5B	572854836	572855958	1123	2	-	TraesCS5B02G395400	TraesCS5B02G395400.1	-1324
GCACGSAWHYCGAGG	MEME-1	chr2B	777558274	777558288	+	15.3421	2.37e-06	0.0131	GCGCGCGTTACGAGG	0	IP_peak_6790	chr2B	777558064	777558299	236	777558279	8.65	4.12888	4.94103	1.88837	Promoter (1-2kb)	chr2B	777555737	777556633	897	2	-	TraesCS2B02G880700LC	TraesCS2B02G880700LC.1	-1646
GCACGSAWHYCGAGG	MEME-1	chr1D	10714949	10714963	+	15.1579	2.59e-06	0.0141	GCACGGAAACCGATA	0	IP_peak_2615	chr1D	10714869	10715123	255	10714951	21.63	5.65855	11.7967	7.70134	Promoter (<=1kb)	chr1D	10715309	10722269	6961	9	+	TraesCS1D02G026200	TraesCS1D02G026200.1	-358
GCACGSAWHYCGAGG	MEME-1	chr7A	68893600	68893614	+	15.1053	2.66e-06	0.0144	GCTCGCATCACGAGG	5	IP_peak_24620	chr7A	68893479	68893746	268	68893595	11.25	8.21784	12.5877	8.45473	Promoter (<=1kb)	chr7A	68893717	68894354	638	2	+	TraesCS7A02G112500	TraesCS7A02G112500.1	-122
GCACGSAWHYCGAGG	MEME-1	chr6D	653413	653427	+	15.0789	2.69e-06	0.0145	GCGCGAATCCCAAGG	4	IP_peak_23390	chr6D	653293	653560	268	653409	19.04	5.00952	10.0802	6.14689	Promoter (<=1kb)	chr6D	653853	654003	151	2	+	TraesCS6D02G002500LC	TraesCS6D02G002500LC.1	-444
GCACGSAWHYCGAGG	MEME-1	chr1D	343900760	343900774	+	14.9605	2.83e-06	0.0152	GCTCGCTTTTCGAGG	0	IP_peak_3166	chr1D	343900542	343900938	397	343900766	27.69	24.595	51.3491	45.426	Promoter (<=1kb)	chr1D	343889209	343900398	11190	23	-	TraesCS1D02G251500	TraesCS1D02G251500.2	-368
GCACGSAWHYCGAGG	MEME-1	chr2B	244526312	244526326	+	14.8684	2.96e-06	0.0158	GCACAAATCTCGAGA	0	IP_peak_5817	chr2B	244526195	244526507	313	244526326	13.85	7.42295	11.3449	7.27452	Promoter (1-2kb)	chr2B	244527961	244528293	333	1	+	TraesCS2B02G330800LC	TraesCS2B02G330800LC.1	-1635
GCACGSAWHYCGAGG	MEME-1	chr6D	373428472	373428486	-	14.8158	3.03e-06	0.0161	ACACACATCCCGAGG	0	IP_peak_24081	chr6D	373428251	373428702	452	373428481	42.4	35.4886	80.8975	73.9216	Promoter (1-2kb)	chr6D	373419749	373426638	6890	10	-	TraesCS6D02G264800	TraesCS6D02G264800.2	-1843
GCACGSAWHYCGAGG	MEME-1	chr6D	97928330	97928344	-	14.7895	3.07e-06	0.0162	GCACGAATCTCAATG	0	IP_peak_23680	chr6D	97928138	97928464	327	97928337	24.23	17.448	34.1427	28.9281	Promoter (1-2kb)	chr6D	97922906	97927160	4255	10	-	TraesCS6D02G131600	TraesCS6D02G131600.1	-1177
GCACGSAWHYCGAGG	MEME-1	chr5D	246301928	246301942	+	14.7895	3.07e-06	0.0162	GCACGAATCTCAATG	5	IP_peak_19854	chr5D	246301811	246302037	227	246301923	14.71	10.8651	17.5575	13.141	Promoter (1-2kb)	chr5D	246303005	246304806	1802	5	+	TraesCS5D02G158300	TraesCS5D02G158300.1	-1082
GCACGSAWHYCGAGG	MEME-1	chr1A	451620475	451620489	-	14.7895	3.07e-06	0.0162	GCACGAATCTCAATG	0	IP_peak_841	chr1A	451620318	451620605	288	451620480	20.77	7.25628	14.2141	9.97722	Promoter (1-2kb)	chr1A	451617712	451619073	1362	2	-	TraesCS1A02G258500	TraesCS1A02G258500.1	-1407
GCACGSAWHYCGAGG	MEME-1	chr5B	620010827	620010841	+	14.6447	3.29e-06	0.0172	GCACGGTTCCCAATG	6	IP_peak_19176	chr5B	620010671	620010947	277	620010821	15.58	8.28831	13.7287	9.50863	Promoter (1-2kb)	chr5B	620012296	620013007	712	3	+	TraesCS5B02G649700LC	TraesCS5B02G649700LC.1	-1475
GCACGSAWHYCGAGG	MEME-1	chr2B	93110936	93110950	+	14.6184	3.33e-06	0.0174	GCTCGCAGCCCGAGG	24	IP_peak_5489	chr2B	93110795	93111033	239	93110912	17.31	9.15368	16.2172	11.8542	Promoter (<=1kb)	chr2B	93111902	93113306	1405	3	+	TraesCS2B02G124600	TraesCS2B02G124600.1	-990
GCACGSAWHYCGAGG	MEME-1	chr7A	642934449	642934463	+	14.5395	3.44e-06	0.0179	GCACGGTTCCCTAGG	9	IP_peak_25775	chr7A	642934289	642934568	280	642934440	19.9	8.94041	16.4091	12.0269	Promoter (1-2kb)	chr7A	642932860	642933099	240	1	-	TraesCS7A02G633800LC	TraesCS7A02G633800LC.1	-1341
GCACGSAWHYCGAGG	MEME-1	chr4A	578232502	578232516	+	14.3684	3.71e-06	0.019	GCACAATACCCGATG	8	IP_peak_13864	chr4A	578232330	578232679	350	578232494	21.63	16.1508	29.9381	24.9258	Promoter (<=1kb)	chr4A	578233482	578234994	1513	1	+	TraesCS4A02G266100	TraesCS4A02G266100.1	-988
GCACGSAWHYCGAGG	MEME-1	chr2B	787803457	787803471	-	14.1974	4e-06	0.0203	GCACAAAATCCAAGG	0	IP_peak_6820	chr2B	787803308	787803585	278	787803466	27.69	9.56393	21.8929	17.2306	Promoter (1-2kb)	chr2B	787800167	787801610	1444	5	-	TraesCS2B02G899100LC	TraesCS2B02G899100LC.1	-1856
GCACGSAWHYCGAGG	MEME-1	chr7A	615376662	615376676	-	14	4.33e-06	0.0217	GAACGATTCTCGAGG	-18	IP_peak_25694	chr7A	615376618	615377003	386	615376694	14.71	3.92781	6.17368	2.8277	Promoter (<=1kb)	chr7A	615374562	615376407	1846	4	-	TraesCS7A02G423300	TraesCS7A02G423300.1	-287
GCACGSAWHYCGAGG	MEME-1	chr4B	248048647	248048661	-	13.9605	4.4e-06	0.022	GCACAAGTTTCGATG	9	IP_peak_14735	chr4B	248048526	248048807	282	248048638	17.31	6.08798	11.1835	7.12859	Promoter (1-2kb)	chr4B	248050186	248050746	561	1	+	TraesCS4B02G231700LC	TraesCS4B02G231700LC.1	-1548
GCACGSAWHYCGAGG	MEME-1	chr4B	586898795	586898809	+	13.8947	4.53e-06	0.0225	GCGCAGATTTCAAGG	-78	IP_peak_15321	chr4B	586898718	586899042	325	586898887	6.92	5.83933	6.97051	3.48617	Promoter (<=1kb)	chr4B	586899147	586902906	3760	4	+	TraesCS4B02G300500	TraesCS4B02G300500.1	-260
GCACGSAWHYCGAGG	MEME-1	chr5A	26439320	26439334	+	13.8816	4.55e-06	0.0225	GCACATTTTACGAGG	0	IP_peak_16569	chr5A	26439145	26439515	371	26439325	46.73	15.8722	46.0447	40.3835	Promoter (<=1kb)	chr5A	26440090	26449927	9838	21	+	TraesCS5A02G030300	TraesCS5A02G030300.1	-765
GCACGSAWHYCGAGG	MEME-1	chr5B	119411802	119411816	+	13.8684	4.58e-06	0.0226	GCACGTTCTTCGAGG	3	IP_peak_18239	chr5B	119411654	119412073	420	119411799	17.31	15.6933	29.886	24.8812	Promoter (1-2kb)	chr5B	119413265	119413471	207	1	+	TraesCS5B02G138200LC	TraesCS5B02G138200LC.1	-1466
GCACGSAWHYCGAGG	MEME-1	chr5B	690707297	690707311	-	13.8684	4.58e-06	0.0226	GCACAGATCTCAATG	-44	IP_peak_19326	chr5B	690707263	690707503	241	690707355	7.79	7.18578	9.90484	5.97593	Promoter (<=1kb)	chr5B	690703538	690707105	3568	10	-	TraesCS5B02G534400	TraesCS5B02G534400.2	-250
GCACGSAWHYCGAGG	MEME-1	chr6D	261011964	261011978	-	13.8158	4.68e-06	0.023	GCACAGATCCCTAGG	-1	IP_peak_23894	chr6D	261011802	261012139	338	261011979	27.69	17.6625	35.4721	30.2382	Promoter (<=1kb)	chr6D	261008692	261011813	3122	2	-	TraesCS6D02G189000	TraesCS6D02G189000.1	-166
GCACGSAWHYCGAGG	MEME-1	chr7B	276732770	276732784	+	13.7763	4.77e-06	0.0234	ACACGAATCTCGATG	-72	IP_peak_26606	chr7B	276732731	276733383	653	276732856	6.92	6.79165	9.21445	5.3363	Promoter (<=1kb)	chr7B	276733608	276738174	4567	11	+	TraesCS7B02G181600	TraesCS7B02G181600.1	-752
GCACGSAWHYCGAGG	MEME-1	chr1D	345374118	345374132	+	13.7763	4.77e-06	0.0234	ACACGAATCTCGATG	6	IP_peak_3168	chr1D	345373985	345374218	234	345374112	13.85	7.42295	11.3449	7.27452	Promoter (<=1kb)	chr1D	345374943	345376713	1771	2	+	TraesCS1D02G253000	TraesCS1D02G253000.1	-831
GCACGSAWHYCGAGG	MEME-1	chr3D	584346026	584346040	-	13.6974	4.94e-06	0.024	GCACGCTTCCCAATG	0	IP_peak_12570	chr3D	584345843	584346212	370	584346028	38.08	16.7129	41.943	36.4429	Promoter (1-2kb)	chr3D	584343212	584344372	1161	2	-	TraesCS3D02G490100	TraesCS3D02G490100.1	-1656
GCACGSAWHYCGAGG	MEME-1	chr4B	15770593	15770607	-	13.6579	5.03e-06	0.0244	GCACAGATTTCAATG	5	IP_peak_14349	chr4B	15770273	15770697	425	15770588	15.58	7.83737	13.0187	8.84037	Promoter (<=1kb)	chr4B	15759954	15769797	9844	4	-	TraesCS4B02G021900	TraesCS4B02G021900.3	-791
GCACGSAWHYCGAGG	MEME-1	chr1A	290205361	290205375	-	13.4342	5.52e-06	0.0264	GCACAAATCTCGAAG	-8	IP_peak_547	chr1A	290205256	290205538	283	290205383	12.98	11.9843	19.9806	15.3886	Promoter (<=1kb)	chr1A	290202033	290205001	2969	2	-	TraesCS1A02G161400	TraesCS1A02G161400.1	-382
GCACGSAWHYCGAGG	MEME-1	chr4A	6639724	6639738	-	13.3816	5.65e-06	0.0269	GCACATCTCCCGAGG	-6	IP_peak_12745	chr4A	6639597	6639860	264	6639744	14.71	7.85563	12.5229	8.39108	Promoter (1-2kb)	chr4A	6634296	6637822	3527	9	-	TraesCS4A02G011600	TraesCS4A02G011600.1	-1922
GCACGSAWHYCGAGG	MEME-1	chr4B	578222057	578222071	+	13.3816	5.65e-06	0.0269	GCACATCTCCCGAGG	0	IP_peak_15294	chr4B	578221870	578222218	349	578222062	30.29	21.6371	44.9724	39.3305	Promoter (1-2kb)	chr4B	578223909	578227846	3938	9	+	TraesCS4B02G292900	TraesCS4B02G292900.1	-1847
GCACGSAWHYCGAGG	MEME-1	chr6A	517449655	517449669	-	13.2237	6.06e-06	0.0286	GCACAGAAACCAATG	0	IP_peak_21809	chr6A	517449492	517449854	363	517449666	31.15	13.7519	31.9358	26.8449	Promoter (<=1kb)	chr6A	517450061	517450333	273	1	+	TraesCS6A02G471200LC	TraesCS6A02G471200LC.1	-395
GCACGSAWHYCGAGG	MEME-1	chr5B	317313537	317313551	-	13.1184	6.3e-06	0.0295	GCACGGAATCCAAGA	-3	IP_peak_18544	chr5B	317313408	317313754	347	317313554	19.9	10.4517	18.7993	14.3011	Promoter (<=1kb)	chr5B	317310352	317313190	2839	5	-	TraesCS5B02G172900	TraesCS5B02G172900.2	-364
GCACGSAWHYCGAGG	MEME-1	chr5B	612674947	612674961	+	13.1184	6.3e-06	0.0295	GCACGGAATCCAAGA	-2	IP_peak_19155	chr5B	612674784	612675126	343	612674963	19.04	17.0043	33.4314	28.3025	Promoter (<=1kb)	chr5B	612673729	612674711	983	2	-	TraesCS5B02G440500	TraesCS5B02G440500.1	-252
GCACGSAWHYCGAGG	MEME-1	chr5A	670620732	670620746	+	13.0921	6.36e-06	0.0297	GCTCGGATTTCAAGG	0	IP_peak_17869	chr5A	670620583	670620904	322	670620736	26.83	13.9132	28.4555	23.512	Promoter (<=1kb)	chr5A	670621595	670625697	4103	5	+	TraesCS5A02G505300	TraesCS5A02G505300.1	-859
GCACGSAWHYCGAGG	MEME-1	chr3A	724553207	724553221	-	13.0263	6.55e-06	0.0304	GCACATATCCCAAGG	0	IP_peak_9717	chr3A	724553063	724553341	279	724553209	17.31	6.10245	11.2084	7.14904	Promoter (1-2kb)	chr3A	724554550	724555071	522	1	+	TraesCS3A02G675800LC	TraesCS3A02G675800LC.1	-1341
GCACGSAWHYCGAGG	MEME-1	chr3D	39621822	39621836	-	12.9868	6.65e-06	0.0308	GCGTGCTAATCGAGG	-8	IP_peak_11558	chr3D	39621759	39622082	324	39621844	5.19	5.30804	7.58964	3.97097	Promoter (<=1kb)	chr3D	39620214	39621334	1121	1	-	TraesCS3D02G079900	TraesCS3D02G079900.1	-510
GCACGSAWHYCGAGG	MEME-1	chr5A	395695493	395695507	+	12.9868	6.65e-06	0.0308	GCTCGCTGCCCGAGG	0	IP_peak_17184	chr5A	395695262	395695626	365	395695504	21.63	11.3171	21.4658	16.8306	Promoter (1-2kb)	chr5A	395697117	395704282	7166	2	+	TraesCS5A02G191200	TraesCS5A02G191200.1	-1613
GCACGSAWHYCGAGG	MEME-1	chr5A	665479560	665479574	+	12.9474	6.75e-06	0.0312	GCGCACATTTCAAGG	-15	IP_peak_17856	chr5A	665479453	665479682	230	665479589	10.38	6.82092	9.78691	5.87046	Promoter (<=1kb)	chr5A	665470983	665478767	7785	9	-	TraesCS5A02G498100	TraesCS5A02G498100.3	-822
GCACGSAWHYCGAGG	MEME-1	chr7B	55068045	55068059	+	12.9211	6.82e-06	0.0315	ACACGTTTATCGAGG	-15	IP_peak_26200	chr7B	55067968	55068206	239	55068074	16.44	9.21852	15.7598	11.4378	Promoter (<=1kb)	chr7B	55065021	55067285	2265	5	-	TraesCS7B02G052700	TraesCS7B02G052700.2	-789
GCACGSAWHYCGAGG	MEME-1	chr6A	117403331	117403345	+	12.9211	6.82e-06	0.0315	GCACACATCTCAATG	-42	IP_peak_21013	chr6A	117403174	117403494	321	117403387	14.71	7.85563	12.5229	8.39108	Promoter (<=1kb)	chr6A	117403629	117405010	1382	2	+	TraesCS6A02G194200LC	TraesCS6A02G194200LC.1	-242
GCACGSAWHYCGAGG	MEME-1	chr5A	482716980	482716994	+	12.8026	7.16e-06	0.0327	GTGCGAATTTCGAGG	0	IP_peak_17406	chr5A	482716871	482717145	275	482716994	16.44	14.9515	27.8522	22.9232	Promoter (1-2kb)	chr5A	482718183	482720260	2078	5	+	TraesCS5A02G273500	TraesCS5A02G273500.1	-1189
GCACGSAWHYCGAGG	MEME-1	chr6B	15131514	15131528	-	12.7368	7.35e-06	0.0335	ACACGTTTCCCGAGG	0	IP_peak_22101	chr6B	15131401	15131658	258	15131525	25.96	6.74026	15.4524	11.1365	Promoter (1-2kb)	chr6B	15128309	15129598	1290	1	-	TraesCS6B02G030600LC	TraesCS6B02G030600LC.1	-1927
GCACGSAWHYCGAGG	MEME-1	chr7A	486141842	486141856	-	12.6842	7.49e-06	0.034	GCACCGAAACCGATG	-38	IP_peak_25377	chr7A	486141841	486142088	248	486141894	6.06	5.87782	8.66056	4.93665	Promoter (<=1kb)	chr7A	486142143	486146449	4307	4	+	TraesCS7A02G332700	TraesCS7A02G332700.1	-249
GCACGSAWHYCGAGG	MEME-1	chr2A	410293080	410293094	+	12.6579	7.57e-06	0.0343	GCACGCTACCCTAGG	37	IP_peak_4382	chr2A	410292855	410293477	623	410293043	6.06	6.04984	9.21445	5.3363	Promoter (<=1kb)	chr2A	410273715	410292540	18826	28	-	TraesCS2A02G260400	TraesCS2A02G260400.1	-503
GCACGSAWHYCGAGG	MEME-1	chr4B	666787232	666787246	+	12.6579	7.57e-06	0.0343	GCACGTATACCTAGG	40	IP_peak_15537	chr4B	666787136	666787377	242	666787192	5.19	4.71888	6.00646	2.69714	Promoter (<=1kb)	chr4B	666787713	666789585	1873	1	+	TraesCS4B02G391200	TraesCS4B02G391200.1	-521
GCACGSAWHYCGAGG	MEME-1	chr3B	817460643	817460657	-	12.6447	7.6e-06	0.0344	GCACGGTGACCAATG	12	IP_peak_11374	chr3B	817460416	817460685	270	817460631	13.85	7.42295	11.3449	7.27452	Promoter (<=1kb)	chr3B	817458870	817459754	885	1	-	TraesCS3B02G881800LC	TraesCS3B02G881800LC.1	-877
GCACGSAWHYCGAGG	MEME-1	chr6B	96336892	96336906	+	12.6053	7.73e-06	0.0349	GCACACATTTCTAGG	0	IP_peak_22292	chr6B	96336756	96337049	294	96336902	14.71	7.85563	12.5229	8.39108	Promoter (1-2kb)	chr6B	96338146	96339639	1494	1	+	TraesCS6B02G162700LC	TraesCS6B02G162700LC.1	-1244
GCACGSAWHYCGAGG	MEME-1	chr6D	27299300	27299314	-	12.5658	7.86e-06	0.0354	GCACGAATTTCAAGA	-6	IP_peak_23521	chr6D	27299209	27299489	281	27299320	26.83	9.27547	20.7457	16.127	Promoter (<=1kb)	chr6D	27300019	27300441	423	1	+	TraesCS6D02G061000LC	TraesCS6D02G061000LC.1	-699
GCACGSAWHYCGAGG	MEME-1	chr7D	184558166	184558180	-	12.5658	7.86e-06	0.0354	GCACGGATTTCAAAG	-29	IP_peak_28055	chr7D	184558041	184558490	450	184558209	8.65	4.82684	5.94877	2.69714	Promoter (<=1kb)	chr7D	184558887	184561128	2242	2	+	TraesCS7D02G223800	TraesCS7D02G223800.1	-678
GCACGSAWHYCGAGG	MEME-1	chr5B	667838308	667838322	-	12.5658	7.86e-06	0.0354	GCACGAATTTCAAGA	0	IP_peak_19258	chr5B	667838253	667838482	230	667838311	12.12	6.55758	10.1966	6.23501	Promoter (<=1kb)	chr5B	667838313	667840235	1923	2	+	TraesCS5B02G500700	TraesCS5B02G500700.1	-2
GCACGSAWHYCGAGG	MEME-1	chr5A	142749578	142749592	-	12.4868	8.11e-06	0.0364	GCACAAATCCCAATG	0	IP_peak_16794	chr5A	142749410	142749714	305	142749588	29.42	15.2113	32.8437	27.7303	Promoter (<=1kb)	chr5A	142748925	142749356	432	1	-	TraesCS5A02G149000LC	TraesCS5A02G149000LC.1	-232
GCACGSAWHYCGAGG	MEME-1	chr2A	15814897	15814911	-	12.4342	8.29e-06	0.037	GCACAAATCTCAATG	27	IP_peak_3666	chr2A	15814729	15815075	347	15814870	9.52	7.05677	9.84554	5.92659	Promoter (1-2kb)	chr2A	15816053	15816745	693	2	+	TraesCS2A02G037000	TraesCS2A02G037000.1	-1183
GCACGSAWHYCGAGG	MEME-1	chr2D	27781846	27781860	-	12.3947	8.42e-06	0.0374	GCACGAAAAACAATG	-92	IP_peak_6982	chr2D	27781761	27782007	247	27781952	12.12	6.55758	10.1966	6.23501	Promoter (1-2kb)	chr2D	27777764	27780582	2819	5	-	TraesCS2D02G064800	TraesCS2D02G064800.1	-1370
GCACGSAWHYCGAGG	MEME-1	chr5B	247056790	247056804	-	12.3684	8.52e-06	0.0377	GCACGGTTTTCAAGA	0	IP_peak_18424	chr5B	247056668	247056890	223	247056798	18.17	6.39091	12.1886	8.07969	Promoter (<=1kb)	chr5B	247057216	247060799	3584	8	+	TraesCS5B02G132400	TraesCS5B02G132400.1	-418
GCACGSAWHYCGAGG	MEME-1	chr2D	324856682	324856696	-	12.3684	8.52e-06	0.0377	GCTCGCTTCCCGATG	61	IP_peak_7549	chr2D	324856522	324856788	267	324856621	20.77	7.25628	14.2141	9.97722	Promoter (1-2kb)	chr2D	324858323	324860693	2371	9	+	TraesCS2D02G266100	TraesCS2D02G266100.1	-1702
GCACGSAWHYCGAGG	MEME-1	chr7D	11430927	11430941	-	12.3158	8.7e-06	0.0383	GCACGATGAACAAGG	13	IP_peak_27615	chr7D	11430801	11431023	223	11430914	6.92	6.03781	7.35958	3.85322	Promoter (<=1kb)	chr7D	11428533	11430382	1850	1	-	TraesCS7D02G024300	TraesCS7D02G024300.1	-532
GCACGSAWHYCGAGG	MEME-1	chr4B	81367549	81367563	+	12.3158	8.7e-06	0.0383	GCTCGCTTCTCGATG	0	IP_peak_14481	chr4B	81367419	81367654	236	81367550	16.44	10.0475	17.1162	12.7207	Promoter (1-2kb)	chr4B	81369276	81381758	12483	26	+	TraesCS4B02G082700	TraesCS4B02G082700.1	-1726
GCACGSAWHYCGAGG	MEME-1	chr1D	73401739	73401753	+	12.2895	8.79e-06	0.0383	GCACAGTTCCCAATG	0	IP_peak_2782	chr1D	73401559	73401935	377	73401752	25.1	22.3695	46.9136	41.1397	Promoter (1-2kb)	chr1D	73393370	73400318	6949	3	-	TraesCS1D02G114600LC	TraesCS1D02G114600LC.1	-1434
GCACGSAWHYCGAGG	MEME-1	chr4A	713118473	713118487	-	12.2763	8.83e-06	0.0384	GCACAAATTCCAATG	0	IP_peak_14207	chr4A	713118296	713118669	374	713118479	102.98	11.5532	74.4171	67.6256	Promoter (1-2kb)	chr4A	713119928	713121020	1093	2	+	TraesCS4A02G445100	TraesCS4A02G445100.1	-1449
GCACGSAWHYCGAGG	MEME-1	chr2B	301987696	301987710	+	12.2368	8.96e-06	0.0389	GCGCACTACCCGATG	0	IP_peak_5920	chr2B	301987489	301987814	326	301987702	9.52	9.01706	14.4095	10.138	Promoter (<=1kb)	chr2B	301988536	301988769	234	1	+	TraesCS2B02G365500LC	TraesCS2B02G365500LC.1	-834
GCACGSAWHYCGAGG	MEME-1	chr3B	528079553	528079567	+	12.2237	9.01e-06	0.0391	ACACGCGGCCCGAGG	18	IP_peak_10734	chr3B	528079346	528079640	295	528079535	12.98	10.3039	15.7562	11.4349	Promoter (<=1kb)	chr3B	528077117	528078954	1838	2	-	TraesCS3B02G327400	TraesCS3B02G327400.1	-581
GCACGSAWHYCGAGG	MEME-1	chr7D	185187832	185187846	-	12.1842	9.14e-06	0.0396	GCACGCACAACGAGA	-16	IP_peak_28059	chr7D	185187744	185187993	250	185187862	11.25	8.47132	13.0666	8.8809	Promoter (1-2kb)	chr7D	185189260	185203138	13879	5	+	TraesCS7D02G225500	TraesCS7D02G225500.1	-1398
GCACGSAWHYCGAGG	MEME-1	chrUn	295018544	295018558	-	12.1842	9.14e-06	0.0396	ACACGAATCTCAAGG	-53	IP_peak_29316	chrUn	295018496	295018933	438	295018611	6.92	6.79165	9.21445	5.3363	Promoter (<=1kb)	chrUn	295014469	295018458	3990	13	-	TraesCSU02G197500	TraesCSU02G197500.2	-153
GCACGSAWHYCGAGG	MEME-1	chr5A	519902145	519902159	-	12.1711	9.2e-06	0.0398	GCACAAATTCCTAGG	24	IP_peak_17481	chr5A	519902017	519902247	231	519902121	13.85	7.42295	11.3449	7.27452	Promoter (1-2kb)	chr5A	519903856	519906212	2357	2	+	TraesCS5A02G307200	TraesCS5A02G307200.1	-1735
GCACGSAWHYCGAGG	MEME-1	chr2D	131475049	131475063	-	11.9342	1.01e-05	0.0431	GCACGGTAACCAAGA	0	IP_peak_7249	chr2D	131474931	131475230	300	131475051	19.04	10.0191	18.7993	14.3011	Promoter (<=1kb)	chr2D	131470374	131474692	4319	10	-	TraesCS2D02G188500	TraesCS2D02G188500.1	-359
GCACGSAWHYCGAGG	MEME-1	chr3A	13904922	13904936	+	11.8816	1.03e-05	0.0437	GCACGCATCCCAAAG	4	IP_peak_8212	chr3A	13904845	13905099	255	13904918	21.63	8.12976	16.2593	11.8834	Promoter (1-2kb)	chr3A	13898356	13903834	5479	11	-	TraesCS3A02G026500	TraesCS3A02G026500.2	-1084
GCACGSAWHYCGAGG	MEME-1	chr7A	237509224	237509238	-	11.7368	1.08e-05	0.0456	GTACGTTTCCCGAGG	0	IP_peak_24988	chr7A	237509159	237509401	243	237509229	7.79	7.53345	10.897	6.85299	Promoter (<=1kb)	chr7A	237502967	237509048	6082	8	-	TraesCS7A02G252400	TraesCS7A02G252400.1	-181
GCACGSAWHYCGAGG	MEME-1	chr2B	37357145	37357159	-	11.6184	1.13e-05	0.0472	GCACGAATTTCTATG	19	IP_peak_5355	chr2B	37356952	37357241	290	37357126	16.44	8.721	14.9606	10.6567	Promoter (<=1kb)	chr2B	37357849	37359766	1918	5	+	TraesCS2B02G070600	TraesCS2B02G070600.1	-723
GCACGSAWHYCGAGG	MEME-1	chr4B	199188859	199188873	-	11.5263	1.17e-05	0.0487	GCACAAATTACGAAG	-54	IP_peak_14676	chr4B	199188819	199189070	252	199188927	19.9	6.96782	13.1909	8.99136	Promoter (1-2kb)	chr4B	199190050	199192524	2475	4	+	TraesCS4B02G144900	TraesCS4B02G144900.1	-1123
GCACGSAWHYCGAGG	MEME-1	chr5B	24020005	24020019	-	11.4737	1.19e-05	0.0496	GCTCGGCGCCCGAGG	-2	IP_peak_18052	chr5B	24019854	24020084	231	24020021	9.52	8.01622	11.7383	7.64491	Promoter (<=1kb)	chr5B	24019346	24019705	360	1	-	TraesCS5B02G033600LC	TraesCS5B02G033600LC.1	-316
GCACGSAWHYCGAGG	MEME-1	chr6D	456459781	456459795	+	11.4737	1.19e-05	0.0496	GCACGCTTTCCAAGA	0	IP_peak_24312	chr6D	456459617	456460262	646	456459790	13.85	10.9416	17.3506	12.95	Promoter (<=1kb)	chr6D	456456327	456458912	2586	5	-	TraesCS6D02G370300	TraesCS6D02G370300.2	-878
GCACGSAWHYCGAGG	MEME-1	chr5B	315751241	315751255	-	11.4605	1.2e-05	0.0498	GCACAAGAATCGAGA	0	IP_peak_18539	chr5B	315751117	315751399	283	315751254	12.12	11.2425	19.9806	15.3886	Promoter (1-2kb)	chr5B	315753108	315753305	198	1	+	TraesCS5B02G288300LC	TraesCS5B02G288300LC.1	-1854
GCACGSAWHYCGAGG	MEME-1	chr2B	544775091	544775105	-	11.4211	1.21e-05	0.0505	GCACGCTTTTCAAGA	-16	IP_peak_6282	chr2B	544774992	544775286	295	544775121	9.52	8.76067	13.6132	9.40446	Promoter (<=1kb)	chr2B	544763181	544774996	11816	21	-	TraesCS2B02G380500	TraesCS2B02G380500.3	-125
GCACGSAWHYCGAGG	MEME-1	chr2A	606832997	606833011	-	11.4211	1.21e-05	0.0505	GCACGCTTTTCAAGA	0	IP_peak_4699	chr2A	606832871	606833188	318	606833006	20.77	18.6605	36.1238	30.818	Promoter (<=1kb)	chr2A	606821901	606832906	11006	21	-	TraesCS2A02G362600	TraesCS2A02G362600.3	-100
GCACGSAWHYCGAGG	MEME-1	chr4A	713895250	713895264	-	11.4211	1.21e-05	0.0505	GCACGCTTTTCAAGA	-5	IP_peak_14219	chr4A	713895178	713895441	264	713895269	16.44	10.4503	17.7925	13.369	Promoter (<=1kb)	chr4A	713893696	713894322	627	1	-	TraesCS4A02G446300	TraesCS4A02G446300.1	-947
GCACGSAWHYCGAGG	MEME-1	chr5A	584512371	584512385	-	11.3947	1.22e-05	0.0507	GCACGAATCCCAAAG	8	IP_peak_17649	chr5A	584512217	584512530	314	584512363	36.35	12.4485	32.8458	27.7311	Promoter (1-2kb)	chr5A	584513606	584517290	3685	4	+	TraesCS5A02G387100	TraesCS5A02G387100.1	-1243
GCACGSAWHYCGAGG	MEME-1	chr2A	733219312	733219326	+	11.3684	1.24e-05	0.0512	GCACAACCTTCGAGG	0	IP_peak_5019	chr2A	733219191	733219427	237	733219319	12.12	6.55758	10.1966	6.23501	Promoter (1-2kb)	chr2A	733215922	733217547	1626	2	-	TraesCS2A02G504300	TraesCS2A02G504300.2	-1772
GCACGSAWHYCGAGG	MEME-1	chr3D	595278899	595278913	-	11.3421	1.25e-05	0.0515	GCTCGTGTCCCGAGG	76	IP_peak_12629	chr3D	595278734	595278968	235	595278823	9.52	7.50596	10.6819	6.68996	Promoter (<=1kb)	chr3D	595274039	595278317	4279	4	-	TraesCS3D02G510300	TraesCS3D02G510300.2	-506
GCACGSAWHYCGAGG	MEME-1	chr1B	685287044	685287058	-	11.2895	1.27e-05	0.0525	GCACGGGTTTCAAGA	-16	IP_peak_2568	chr1B	685286938	685287399	462	685287074	7.79	6.69728	8.77014	5.03769	Promoter (1-2kb)	chr1B	685272532	685286030	13499	28	-	TraesCS1B02G476500	TraesCS1B02G476500.1	-1044
GCACGSAWHYCGAGG	MEME-1	chr3D	116088003	116088017	+	11.2632	1.28e-05	0.0528	GCACGCACCCCAATG	-30	IP_peak_11756	chr3D	116087945	116088168	224	116088047	15.58	8.28831	13.7287	9.50863	Promoter (<=1kb)	chr3D	116088424	116088711	288	1	+	TraesCS3D02G151900	TraesCS3D02G151900.1	-377
GCACGSAWHYCGAGG	MEME-1	chrUn	347307900	347307914	-	11.25	1.29e-05	0.053	GCACAACTCCCAAGG	-65	IP_peak_29361	chrUn	347307828	347308066	239	347307979	23.36	3.48071	7.60524	3.98646	Promoter (<=1kb)	chrUn	347306793	347307110	318	1	-	TraesCSU02G490500LC	TraesCSU02G490500LC.1	-869
GCACGSAWHYCGAGG	MEME-1	chr2A	767941631	767941645	-	11.25	1.29e-05	0.053	GCATGCACATCGATG	203	IP_peak_5164	chr2A	767941352	767941649	298	767941428	14.71	5.64317	9.06902	5.30512	Promoter (<=1kb)	chr2A	767942166	767944738	2573	3	+	TraesCS2A02G570300	TraesCS2A02G570300.1	-738
GCACGSAWHYCGAGG	MEME-1	chr1B	39671221	39671235	-	11.2368	1.29e-05	0.0531	GCACAATCCCCGATG	-5	IP_peak_1381	chr1B	39671114	39671373	260	39671240	14.71	12.3943	20.8127	16.1919	Promoter (<=1kb)	chr1B	39672068	39673326	1259	2	+	TraesCS1B02G057200	TraesCS1B02G057200.1	-828
GCACGSAWHYCGAGG	MEME-1	chr7D	437647419	437647433	+	11.1974	1.31e-05	0.0539	GCACGCATTTCGAAA	0	IP_peak_28423	chr7D	437647273	437647597	325	437647423	26.83	11.9014	25.1818	20.4002	Promoter (<=1kb)	chr7D	437637851	437646427	8577	10	-	TraesCS7D02G342200	TraesCS7D02G342200.1	-996
GCACGSAWHYCGAGG	MEME-1	chr7B	637694615	637694629	+	11.1447	1.34e-05	0.0547	GCACGCTGTCCTAGG	25	IP_peak_27263	chr7B	637694486	637694781	296	637694590	12.12	8.66869	13.7701	9.54967	Promoter (1-2kb)	chr7B	637689973	637692778	2806	4	-	TraesCS7B02G371700	TraesCS7B02G371700.1	-1812
GCACGSAWHYCGAGG	MEME-1	chr5B	253192274	253192288	+	11.0395	1.39e-05	0.0567	GCACGATTCACGATA	35	IP_peak_18432	chr5B	253192122	253192350	229	253192239	18.17	9.58637	17.4972	13.0844	Promoter (1-2kb)	chr5B	253194145	253194384	240	1	+	TraesCS5B02G237700LC	TraesCS5B02G237700LC.1	-1906
GCACGSAWHYCGAGG	MEME-1	chr1B	290898316	290898330	-	11.0263	1.4e-05	0.0569	GCACACTTTCCTAGG	-1	IP_peak_1773	chr1B	290898161	290898429	269	290898331	18.17	9.58637	17.4972	13.0844	Promoter (1-2kb)	chr1B	290899666	290899971	306	1	+	TraesCS1B02G317900LC	TraesCS1B02G317900LC.1	-1335
GCACGSAWHYCGAGG	MEME-1	chr3B	11099352	11099366	+	10.9342	1.45e-05	0.0586	GCACGATTTTCAAGA	-25	IP_peak_9849	chr3B	11099234	11099711	478	11099391	16.44	5.814	10.2513	6.27357	Promoter (1-2kb)	chr3B	11100915	11102042	1128	1	+	TraesCS3B02G027700LC	TraesCS3B02G027700LC.1	-1524
GCACGSAWHYCGAGG	MEME-1	chr5B	595016849	595016863	+	10.9342	1.45e-05	0.0586	GCGTGGAACCCAAGG	13	IP_peak_19115	chr5B	595016693	595016924	232	595016836	11.25	6.12489	9.08008	5.30512	Promoter (1-2kb)	chr5B	595018437	595018895	459	1	+	TraesCS5B02G613900LC	TraesCS5B02G613900LC.1	-1601
GCACGSAWHYCGAGG	MEME-1	chr4B	486287510	486287524	-	10.8553	1.49e-05	0.0598	GCACGCATCGCGAGG	-95	IP_peak_15104	chr4B	486287449	486287751	303	486287619	7.79	6.69728	8.77014	5.03769	Promoter (<=1kb)	chr4B	486284163	486286862	2700	3	-	TraesCS4B02G233900	TraesCS4B02G233900.4	-757
GCACGSAWHYCGAGG	MEME-1	chr7A	26452023	26452037	+	10.7632	1.55e-05	0.0614	ACACGGATCTCAATG	-7	IP_peak_24466	chr7A	26451966	26452219	254	26452044	7.79	7.18578	9.90484	5.97593	Promoter (<=1kb)	chr7A	26448242	26451176	2935	1	-	TraesCS7A02G055000	TraesCS7A02G055000.1	-868
GCACGSAWHYCGAGG	MEME-1	chr1B	176787544	176787558	-	10.7632	1.55e-05	0.0614	ACACGGATCTCAATG	14	IP_peak_1621	chr1B	176787439	176787678	240	176787530	13.85	7.42295	11.3449	7.27452	Promoter (1-2kb)	chr1B	176788566	176789000	435	1	+	TraesCS1B02G231100LC	TraesCS1B02G231100LC.1	-1036
GCACGSAWHYCGAGG	MEME-1	chr7A	127593346	127593360	+	10.75	1.55e-05	0.0617	GCACCAAATTCGATG	79	IP_peak_24789	chr7A	127593099	127593448	350	127593267	12.12	6.55758	10.1966	6.23501	Promoter (1-2kb)	chr7A	127594893	127602177	7285	6	+	TraesCS7A02G172900	TraesCS7A02G172900.1	-1626
GCACGSAWHYCGAGG	MEME-1	chr2A	675106755	675106769	+	10.7237	1.57e-05	0.0621	GGACGGATCCCGAGG	-7	IP_peak_4868	chr2A	675106705	675106935	231	675106776	10.38	6.01695	8.5009	4.79101	Promoter (<=1kb)	chr2A	675102509	675106006	3498	6	-	TraesCS2A02G577700LC	TraesCS2A02G577700LC.1	-770
GCACGSAWHYCGAGG	MEME-1	chr5D	372043837	372043851	-	10.7105	1.58e-05	0.0621	GCACGGAAACCAATA	0	IP_peak_20127	chr5D	372043682	372043960	279	372043851	16.44	8.721	14.9606	10.6567	Promoter (<=1kb)	chr5D	372044493	372048986	4494	3	+	TraesCS5D02G346400LC	TraesCS5D02G346400LC.1	-642
GCACGSAWHYCGAGG	MEME-1	chr2A	653685729	653685743	-	10.6974	1.58e-05	0.0623	GCACACATTTCAAGA	0	IP_peak_4813	chr2A	653685420	653685899	480	653685734	18.17	13.2589	23.9311	19.1734	Promoter (<=1kb)	chr2A	653686146	653688894	2749	9	+	TraesCS2A02G400400	TraesCS2A02G400400.1	-412
GCACGSAWHYCGAGG	MEME-1	chr1D	376244631	376244645	-	10.6579	1.61e-05	0.0632	GCACGGAAATCAATA	-44	IP_peak_3238	chr1D	376244563	376245047	485	376244689	10.38	7.87288	11.6355	7.5455	Promoter (1-2kb)	chr1D	376246285	376246578	294	1	+	TraesCS1D02G389200LC	TraesCS1D02G389200LC.1	-1596
GCACGSAWHYCGAGG	MEME-1	chr7A	116591448	116591462	-	10.5921	1.65e-05	0.0645	GCACAAACTTCGAGA	0	IP_peak_24747	chr7A	116591354	116591650	297	116591459	6.06	5.98906	9.01018	5.25107	Promoter (<=1kb)	chr7A	116590948	116591241	294	1	-	TraesCS7A02G216200LC	TraesCS7A02G216200LC.1	-218
GCACGSAWHYCGAGG	MEME-1	chr5D	464084895	464084909	+	10.5921	1.65e-05	0.0645	GCACAAAATACGAAG	0	IP_peak_20372	chr5D	464084858	464085155	298	464084897	7.79	4.39416	4.98931	1.91819	Promoter (1-2kb)	chr5D	464086880	464090650	3771	4	+	TraesCS5D02G397000	TraesCS5D02G397000.1	-1983
GCACGSAWHYCGAGG	MEME-1	chr5A	622207894	622207908	-	10.5789	1.66e-05	0.0648	GCACGGTCCCCAATG	0	IP_peak_17748	chr5A	622207723	622208025	303	622207899	12.12	10.3463	17.3444	12.9446	Promoter (<=1kb)	chr5A	622200992	622207567	6576	11	-	TraesCS5A02G441200	TraesCS5A02G441200.1	-332
GCACGSAWHYCGAGG	MEME-1	chr5B	131313306	131313320	+	10.5263	1.69e-05	0.0656	GCTCGCCGCCCGAGG	0	IP_peak_18249	chr5B	131313226	131313468	243	131313317	13.85	7.42295	11.3449	7.27452	Promoter (1-2kb)	chr5B	131314723	131318371	3649	11	+	TraesCS5B02G098900	TraesCS5B02G098900.1	-1406
GCACGSAWHYCGAGG	MEME-1	chr1A	333627919	333627933	+	10.5263	1.69e-05	0.0656	GCTCGCCGCCCGAGG	3	IP_peak_621	chr1A	333627845	333628082	238	333627916	11.25	8.74094	13.5978	9.38981	Promoter (<=1kb)	chr1A	333617758	333627407	9650	8	-	TraesCS1A02G183800	TraesCS1A02G183800.3	-509
GCACGSAWHYCGAGG	MEME-1	chr7B	380505698	380505712	+	10.5263	1.69e-05	0.0656	GCTCGCCGCCCGAGG	0	IP_peak_26749	chr7B	380505541	380505867	327	380505707	21.63	13.5612	25.1685	20.3877	Promoter (1-2kb)	chr7B	380506729	380511747	5019	8	+	TraesCS7B02G207700	TraesCS7B02G207700.1	-1022
GCACGSAWHYCGAGG	MEME-1	chr3A	621038833	621038847	+	10.5263	1.69e-05	0.0656	GCTCGCCGCCCGAGG	0	IP_peak_9367	chr3A	621038658	621038923	266	621038837	14.71	6.7197	10.7626	6.76673	Promoter (1-2kb)	chr3A	621036539	621037471	933	1	-	TraesCS3A02G511300LC	TraesCS3A02G511300LC.1	-1366
GCACGSAWHYCGAGG	MEME-1	chr5B	622623105	622623119	-	10.5263	1.69e-05	0.0656	GCTCGCCGCCCGAGG	0	IP_peak_19181	chr5B	622622966	622623285	320	622623116	19.04	9.47395	17.9007	13.4739	Promoter (<=1kb)	chr5B	622623833	622626666	2834	3	+	TraesCS5B02G451100	TraesCS5B02G451100.1	-717
GCACGSAWHYCGAGG	MEME-1	chr2A	729772345	729772359	+	10.5263	1.69e-05	0.0656	GCTCGCCGCCCGAGG	10	IP_peak_5009	chr2A	729772170	729772439	270	729772335	6.92	6.79165	9.21445	5.3363	Promoter (<=1kb)	chr2A	729772454	729774483	2030	2	+	TraesCS2A02G501400	TraesCS2A02G501400.1	-119
GCACGSAWHYCGAGG	MEME-1	chr7A	527533654	527533668	-	10.5132	1.69e-05	0.0659	GCACGGTAGCCAAGG	6	IP_peak_25490	chr7A	527533529	527533797	269	527533648	6.92	5.16074	5.80523	2.60873	Promoter (<=1kb)	chr7A	527534164	527534529	366	1	+	TraesCS7A02G513400LC	TraesCS7A02G513400LC.1	-516
GCACGSAWHYCGAGG	MEME-1	chr1B	181323190	181323204	-	10.4737	1.72e-05	0.0666	GCACAAATCCCAAGA	54	IP_peak_1631	chr1B	181323007	181323281	275	181323136	20.77	7.25628	14.2141	9.97722	Promoter (1-2kb)	chr1B	181313673	181321420	7748	3	-	TraesCS1B02G139100	TraesCS1B02G139100.1	-1716
GCACGSAWHYCGAGG	MEME-1	chr4B	584148738	584148752	+	10.4737	1.72e-05	0.0666	GCACAAATCCCAAGA	0	IP_peak_15311	chr4B	584148581	584148949	369	584148749	23.36	17.9573	34.6825	29.4551	Promoter (1-2kb)	chr4B	584146935	584147405	471	1	-	TraesCS4B02G485600LC	TraesCS4B02G485600LC.1	-1344
GCACGSAWHYCGAGG	MEME-1	chr3A	44434872	44434886	+	10.4211	1.75e-05	0.0677	GCACAAATCTCAAGA	-7	IP_peak_8308	chr3A	44434726	44434968	243	44434893	8.65	6.67599	8.88947	5.14526	Promoter (<=1kb)	chr3A	44432000	44434689	2690	7	-	TraesCS3A02G071600	TraesCS3A02G071600.1	-204
GCACGSAWHYCGAGG	MEME-1	chr1B	242658903	242658917	-	10.4079	1.76e-05	0.0679	GCACACTACCCAATG	0	IP_peak_1715	chr1B	242658753	242659028	276	242658903	10.38	8.39049	12.6661	8.49512	Promoter (1-2kb)	chr1B	242660092	242668804	8713	6	+	TraesCS1B02G152200	TraesCS1B02G152200.2	-1189
GCACGSAWHYCGAGG	MEME-1	chr4B	262843399	262843413	+	10.3947	1.76e-05	0.0682	ACACGGATTTTGAGG	21	IP_peak_14759	chr4B	262843221	262843471	251	262843378	18.17	6.39091	12.1886	8.07969	Promoter (<=1kb)	chr4B	262844232	262844942	711	1	+	TraesCS4B02G244500LC	TraesCS4B02G244500LC.1	-854
GCACGSAWHYCGAGG	MEME-1	chr1A	583995660	583995674	+	10.2763	1.83e-05	0.0706	GCACAGTTCCCAAGA	0	IP_peak_1242	chr1A	583995496	583995897	402	583995663	46.73	15.91	46.1144	40.4528	Promoter (<=1kb)	chr1A	583995762	584006688	10927	3	+	TraesCS1A02G432000	TraesCS1A02G432000.1	-99
GCACGSAWHYCGAGG	MEME-1	chr6D	240022292	240022306	+	10.1711	1.9e-05	0.0728	GCACATATCCCAATG	-11	IP_peak_23867	chr6D	240022192	240022449	258	240022317	10.38	7.41542	10.7999	6.79871	Promoter (<=1kb)	chr6D	240022516	240022872	357	1	+	TraesCS6D02G270900LC	TraesCS6D02G270900LC.1	-199
GCACGSAWHYCGAGG	MEME-1	chr5A	503510816	503510830	-	10.1184	1.93e-05	0.074	GCACGAGTCCCAAGA	0	IP_peak_17453	chr5A	503510677	503511137	461	503510820	11.25	7.3394	11.0426	6.99154	Promoter (<=1kb)	chr5A	503511565	503513327	1763	2	+	TraesCS5A02G422500LC	TraesCS5A02G422500LC.1	-745
GCACGSAWHYCGAGG	MEME-1	chr1A	249042118	249042132	+	10.0789	1.96e-05	0.0748	GCTCGGATCCCGATA	-7	IP_peak_480	chr1A	249041994	249042280	287	249042139	13.85	7.42295	11.3449	7.27452	Promoter (<=1kb)	chr1A	249042636	249057221	14586	26	+	TraesCS1A02G144000	TraesCS1A02G144000.1	-497
GCACGSAWHYCGAGG	MEME-1	chr4A	562287697	562287711	-	10.0658	1.97e-05	0.0751	ACACGGAAATCAATG	0	IP_peak_13826	chr4A	562287557	562287841	285	562287706	11.25	7.75382	11.7527	7.65822	Promoter (1-2kb)	chr4A	562281849	562286375	4527	10	-	TraesCS4A02G250800	TraesCS4A02G250800.1	-1331
GCACGSAWHYCGAGG	MEME-1	chr5B	445178723	445178737	+	10.0395	1.99e-05	0.0757	GCGCGTATACCTAGG	-73	IP_peak_18811	chr5B	445178720	445178949	230	445178810	5.19	4.88492	6.39162	2.99006	Promoter (<=1kb)	chr5B	445177608	445178621	1014	1	-	TraesCS5B02G416200LC	TraesCS5B02G416200LC.1	-189
GCACGSAWHYCGAGG	MEME-1	chr6D	63928263	63928277	+	9.98684	2.02e-05	0.0766	GCACAAAGTTCAATG	143	IP_peak_23613	chr6D	63928027	63928383	357	63928120	4.33	4.56623	6.03134	2.69714	Promoter (<=1kb)	chr6D	63929088	63929960	873	1	+	TraesCS6D02G117300LC	TraesCS6D02G117300LC.1	-968
GCACGSAWHYCGAGG	MEME-1	chr7B	478734101	478734115	+	9.98684	2.02e-05	0.0766	ACACGGTGATCAAGG	0	IP_peak_26911	chr7B	478733998	478734411	414	478734104	10.38	5.61953	7.88615	4.24567	Promoter (<=1kb)	chr7B	478732874	478733809	936	1	-	TraesCS7B02G258100	TraesCS7B02G258100.1	-295
GCACGSAWHYCGAGG	MEME-1	chr3A	584021266	584021280	+	9.90789	2.08e-05	0.0781	GCTCGCCTCCCGATG	0	IP_peak_9272	chr3A	584021154	584021413	260	584021276	17.31	9.15368	16.2172	11.8542	Promoter (1-2kb)	chr3A	584015491	584019577	4087	5	-	TraesCS3A02G337200	TraesCS3A02G337200.1	-1699
GCACGSAWHYCGAGG	MEME-1	chr6D	68629265	68629279	+	9.80263	2.16e-05	0.0805	GCGCGTATCCCTAGG	96	IP_peak_23624	chr6D	68629036	68629300	265	68629169	6.06	6.04984	9.21445	5.3363	Promoter (<=1kb)	chr6D	68630146	68637982	7837	3	+	TraesCS6D02G105100	TraesCS6D02G105100.1	-977
GCACGSAWHYCGAGG	MEME-1	chr5B	495832893	495832907	+	9.65789	2.27e-05	0.0841	GCACGCACGCCGATG	29	IP_peak_18923	chr5B	495832785	495833013	229	495832864	9.52	7.27444	10.2419	6.26689	Promoter (1-2kb)	chr5B	495830526	495831064	539	2	-	TraesCS5B02G480000LC	TraesCS5B02G480000LC.1	-1800
GCACGSAWHYCGAGG	MEME-1	chr4B	655776634	655776648	+	9.55263	2.35e-05	0.0869	ACACGCATTCCTAGG	0	IP_peak_15501	chr4B	655776511	655776821	311	655776636	19.9	10.4517	18.7993	14.3011	Promoter (1-2kb)	chr4B	655771123	655774984	3862	4	-	TraesCS4B02G370000	TraesCS4B02G370000.1	-1652
GCACGSAWHYCGAGG	MEME-1	chr2B	23035559	23035573	+	9.52632	2.38e-05	0.0875	GCACACATCCCAAAG	7	IP_peak_5288	chr2B	23035425	23035660	236	23035552	13.85	7.42295	11.3449	7.27452	Promoter (<=1kb)	chr2B	23035715	23041665	5951	5	+	TraesCS2B02G045500LC	TraesCS2B02G045500LC.1	-163
GCACGSAWHYCGAGG	MEME-1	chr3D	510350646	510350660	-	9.47368	2.42e-05	0.0888	GCGCGTTTGTCGAGG	74	IP_peak_12349	chr3D	510350500	510350772	273	510350572	5.19	5.06307	6.85018	3.3933	Promoter (<=1kb)	chr3D	510351447	510352034	588	1	+	TraesCS3D02G481500LC	TraesCS3D02G481500LC.1	-875
GCACGSAWHYCGAGG	MEME-1	chr5B	56371561	56371575	+	9.43421	2.45e-05	0.0898	GCTCGCGTTTCAAGG	5	IP_peak_18125	chr5B	56371395	56371646	252	56371556	8.65	6.67599	8.88947	5.14526	Promoter (<=1kb)	chr5B	56371581	56372291	711	1	+	TraesCS5B02G078700LC	TraesCS5B02G078700LC.1	-25
GCACGSAWHYCGAGG	MEME-1	chr2B	656243550	656243564	-	9.39474	2.48e-05	0.0908	GCCCGAATCCCGAGG	0	IP_peak_6522	chr2B	656243404	656243734	331	656243561	19.04	12.0057	22.1535	17.4699	Promoter (<=1kb)	chr2B	656228897	656243308	14412	12	-	TraesCS2B02G462500	TraesCS2B02G462500.2	-253
GCACGSAWHYCGAGG	MEME-1	chr1D	192568475	192568489	+	9.32895	2.54e-05	0.0925	ACACGAATCTCAATG	7	IP_peak_2942	chr1D	192568294	192568666	373	192568468	11.25	9.33516	14.8719	10.5776	Promoter (<=1kb)	chr1D	192569083	192571639	2557	1	+	TraesCS1D02G139700	TraesCS1D02G139700.1	-615
GCACGSAWHYCGAGG	MEME-1	chr1A	377022912	377022926	+	9.32895	2.54e-05	0.0925	ACACGAATCTCAATG	-15	IP_peak_715	chr1A	377022806	377023055	250	377022941	8.65	7.35675	10.2315	6.26651	Promoter (<=1kb)	chr1A	377023380	377028142	4763	15	+	TraesCS1A02G213900	TraesCS1A02G213900.1	-439
GCACGSAWHYCGAGG	MEME-1	chr6A	439664859	439664873	+	9.30263	2.56e-05	0.0933	GCACACATGTCGAGA	188	IP_peak_21617	chr6A	439664557	439664940	384	439664671	26.83	5.56528	13.452	9.24773	Promoter (1-2kb)	chr6A	439665994	439669885	3892	5	+	TraesCS6A02G232300	TraesCS6A02G232300.1	-1323
GCACGSAWHYCGAGG	MEME-1	chr7D	30505215	30505229	+	9.26316	2.59e-05	0.0938	GCACGAATCTCCAGG	-21	IP_peak_27691	chr7D	30505146	30505378	233	30505250	6.06	6.04984	9.21445	5.3363	Promoter (<=1kb)	chr7D	30502687	30505113	2427	2	-	TraesCS7D02G057100	TraesCS7D02G057100.1	-137
GCACGSAWHYCGAGG	MEME-1	chr6A	606368876	606368890	-	9.19737	2.65e-05	0.0952	ACACACAAATCGAGA	0	IP_peak_22008	chr6A	606368720	606369013	294	606368880	17.31	9.15368	16.2172	11.8542	Promoter (1-2kb)	chr6A	606366979	606367353	375	1	-	TraesCS6A02G591500LC	TraesCS6A02G591500LC.1	-1527
GCACGSAWHYCGAGG	MEME-1	chr7A	296737266	296737280	-	9.07895	2.76e-05	0.0985	GCACGTATCCCAAAG	2	IP_peak_25100	chr7A	296737116	296737475	360	296737264	38.94	17.083	41.943	36.4429	Promoter (1-2kb)	chr7A	296739164	296739568	405	2	+	TraesCS7A02G367400LC	TraesCS7A02G367400LC.1	-1900
GCACGSAWHYCGAGG	MEME-1	chr7D	12069576	12069590	+	9.03947	2.79e-05	0.0995	GCACAAATCCCAAAG	0	IP_peak_27617	chr7D	12069382	12069828	447	12069579	20.77	7.25628	14.2141	9.97722	Promoter (<=1kb)	chr7D	12070271	12071008	738	1	+	TraesCS7D02G025400	TraesCS7D02G025400.1	-692
GCACGSAWHYCGAGG	MEME-1	chr3B	39900600	39900614	-	9.03947	2.79e-05	0.0995	GCACAAATCCCAAAG	99	IP_peak_9959	chr3B	39900391	39900650	260	39900501	6.92	6.79165	9.21445	5.3363	Promoter (<=1kb)	chr3B	39900638	39905366	4729	14	+	TraesCS3B02G067300	TraesCS3B02G067300.1	-137
GCACGSAWHYCGAGG	MEME-1	chr5A	605321716	605321730	-	9.03947	2.79e-05	0.0995	GCACAAATCCCAAAG	-8	IP_peak_17694	chr5A	605321645	605321893	249	605321738	33.75	6.94987	19.6848	15.1614	Promoter (<=1kb)	chr5A	605321232	605321588	357	1	-	TraesCS5A02G568800LC	TraesCS5A02G568800LC.1	-150
GCACGSAWHYCGAGG	MEME-1	chr2B	17493698	17493712	+	8.98684	2.84e-05	0.101	GTACGGTGATCAAGG	-137	IP_peak_5277	chr2B	17493637	17493925	289	17493849	5.19	4.15408	4.89461	1.84722	Promoter (1-2kb)	chr2B	17485487	17492034	6548	4	-	TraesCS2B02G037400	TraesCS2B02G037400.1	-1815
GCACGSAWHYCGAGG	MEME-1	chr3B	2473112	2473126	-	8.98684	2.84e-05	0.101	GCACAAATCTCAAAG	-118	IP_peak_9819	chr3B	2473046	2473272	227	2473244	9.52	5.30926	7.02781	3.5397	Promoter (1-2kb)	chr3B	2474280	2477547	3268	9	+	TraesCS3B02G004100	TraesCS3B02G004100.1	-1036
GCACGSAWHYCGAGG	MEME-1	chr5A	445809629	445809643	+	8.86842	2.95e-05	0.104	GCACAAGAATTGAGG	0	IP_peak_17286	chr5A	445809484	445809728	245	445809630	5.19	5.30804	7.58964	3.97097	Promoter (1-2kb)	chr5A	445811438	445811747	310	2	+	TraesCS5A02G355100LC	TraesCS5A02G355100LC.1	-1808
GCACGSAWHYCGAGG	MEME-1	chr7B	99484123	99484137	+	8.75	3.07e-05	0.108	GCACTAAAATCGAGG	-13	IP_peak_26304	chr7B	99483996	99484357	362	99484150	19.04	16.3842	31.5117	26.456	Promoter (<=1kb)	chr7B	99484295	99484622	328	2	+	TraesCS7B02G142300LC	TraesCS7B02G142300LC.1	-145
GCACGSAWHYCGAGG	MEME-1	chr5D	446686361	446686375	+	8.73684	3.08e-05	0.108	GCGCGCTGCCCTAGG	0	IP_peak_20318	chr5D	446686114	446686429	316	446686372	6.06	5.98906	9.01018	5.25107	Promoter (1-2kb)	chr5D	446684441	446684746	306	1	-	TraesCS5D02G462700LC	TraesCS5D02G462700LC.1	-1626
GCACGSAWHYCGAGG	MEME-1	chr6A	18701060	18701074	+	8.68421	3.14e-05	0.11	GCACGAGTCCCAAAG	3	IP_peak_20758	chr6A	18700931	18701181	251	18701057	15.58	12.6325	21.5368	16.8961	Promoter (1-2kb)	chr6A	18702339	18704533	2195	3	+	TraesCS6A02G037700	TraesCS6A02G037700.1	-1282
GCACGSAWHYCGAGG	MEME-1	chr4D	420147970	420147984	+	8.64474	3.18e-05	0.111	GCCCGAAAATCGAGG	0	IP_peak_16209	chr4D	420147803	420148077	275	420147976	30.29	10.4046	25.3788	20.5924	Promoter (1-2kb)	chr4D	420144655	420146206	1552	2	-	TraesCS4D02G251800	TraesCS4D02G251800.1	-1770
GCACGSAWHYCGAGG	MEME-1	chr5A	85860624	85860638	-	8.63158	3.19e-05	0.112	GCACAATTTCCAAGA	-65	IP_peak_16691	chr5A	85860567	85860828	262	85860703	13.85	8.89484	13.6548	9.44412	Promoter (<=1kb)	chr5A	85819349	85860453	41105	20	-	TraesCS5A02G073600	TraesCS5A02G073600.1	-250
GCACGSAWHYCGAGG	MEME-1	chr5D	92175377	92175391	-	8.63158	3.19e-05	0.112	GCACAATTTCCAAGA	-53	IP_peak_19652	chr5D	92175342	92175578	237	92175444	10.38	7.87288	11.6355	7.5455	Promoter (<=1kb)	chr5D	92140682	92175180	34499	20	-	TraesCS5D02G086900	TraesCS5D02G086900.1	-264
GCACGSAWHYCGAGG	MEME-1	chr3D	437676278	437676292	+	8.52632	3.3e-05	0.115	GCACGACTTCCAAGA	20	IP_peak_12218	chr3D	437676020	437676406	387	437676258	11.25	10.5007	18.0879	13.6263	Promoter (1-2kb)	chr3D	437677993	437678331	339	1	+	TraesCS3D02G412700LC	TraesCS3D02G412700LC.1	-1735
GCACGSAWHYCGAGG	MEME-1	chr1B	591429520	591429534	+	8.52632	3.3e-05	0.115	GCTCGAGTTTCGAGA	-1	IP_peak_2329	chr1B	591429414	591429661	248	591429535	25.1	5.21914	12.6201	8.46143	Promoter (<=1kb)	chr1B	591426353	591428606	2254	3	-	TraesCS1B02G362900	TraesCS1B02G362900.1	-929
GCACGSAWHYCGAGG	MEME-1	chr1B	122350636	122350650	+	8.44737	3.38e-05	0.117	GCACGGATTTTTAGG	6	IP_peak_1560	chr1B	122350552	122350788	237	122350630	4.33	4.56623	6.03134	2.69714	Promoter (<=1kb)	chr1B	122347881	122349818	1938	2	-	TraesCS1B02G182500LC	TraesCS1B02G182500LC.1	-812
GCACGSAWHYCGAGG	MEME-1	chr3B	801197215	801197229	+	8.43421	3.4e-05	0.118	GCGCAATGCCCGAGA	5	IP_peak_11311	chr3B	801197096	801197709	614	801197210	6.06	5.77064	8.34871	4.64755	Promoter (1-2kb)	chr3B	801193237	801195753	2517	1	-	TraesCS3B02G846900LC	TraesCS3B02G846900LC.1	-1457
GCACGSAWHYCGAGG	MEME-1	chr4A	712851207	712851221	-	8.35526	3.49e-05	0.121	GCACGTACCCCTAGG	-175	IP_peak_14200	chr4A	712851161	712851471	311	712851396	9.52	6.85175	9.48519	5.59069	Promoter (1-2kb)	chr4A	712848225	712849516	1292	3	-	TraesCS4A02G444100	TraesCS4A02G444100.1	-1880
GCACGSAWHYCGAGG	MEME-1	chr3A	724375432	724375446	-	8.35526	3.49e-05	0.121	GCACGGTCTCCAAGA	0	IP_peak_9715	chr3A	724375252	724375556	305	724375441	17.31	9.15368	16.2172	11.8542	Promoter (<=1kb)	chr3A	724375617	724382337	6721	6	+	TraesCS3A02G499100	TraesCS3A02G499100.1	-176
GCACGSAWHYCGAGG	MEME-1	chr7A	202716567	202716581	-	8.28947	3.57e-05	0.123	GCACGAAACACGAAA	0	IP_peak_24936	chr7A	202716433	202716722	290	202716576	6.06	6.04984	9.21445	5.3363	Promoter (1-2kb)	chr7A	202718170	202724388	6219	12	+	TraesCS7A02G231600	TraesCS7A02G231600.1	-1594
GCACGSAWHYCGAGG	MEME-1	chr1A	403829875	403829889	+	8.28947	3.57e-05	0.123	GCACGATTCTCAATA	0	IP_peak_769	chr1A	403829736	403830184	449	403829888	18.17	13.2589	23.9311	19.1734	Promoter (<=1kb)	chr1A	403830491	403831186	696	2	+	TraesCS1A02G365300LC	TraesCS1A02G365300LC.1	-603
GCACGSAWHYCGAGG	MEME-1	chr3D	63391315	63391329	-	8.23684	3.63e-05	0.124	GCGCGCATCGCGAGG	-61	IP_peak_11636	chr3D	63391226	63391503	278	63391390	19.04	6.67937	13.1909	8.99136	Promoter (<=1kb)	chr3D	63390399	63390941	543	1	-	TraesCS3D02G118900LC	TraesCS3D02G118900LC.1	-449
GCACGSAWHYCGAGG	MEME-1	chr7D	167060117	167060131	-	8.17105	3.71e-05	0.126	GCACATTTTTCTAGG	-82	IP_peak_28028	chr7D	167059768	167060543	776	167060213	9.52	5.55958	7.40679	3.8892	Promoter (1-2kb)	chr7D	167056836	167058428	1593	1	-	TraesCS7D02G208800	TraesCS7D02G208800.1	-1785
GCACGSAWHYCGAGG	MEME-1	chr7B	44545568	44545582	-	8.15789	3.73e-05	0.127	GCACCGTGACCAAGG	-143	IP_peak_26177	chr7B	44545563	44545943	381	44545725	33.75	11.5831	29.0782	24.1225	Promoter (<=1kb)	chr7B	44546405	44548546	2142	1	+	TraesCS7B02G072500LC	TraesCS7B02G072500LC.1	-680
GCACGSAWHYCGAGG	MEME-1	chr3A	17486691	17486705	+	8.14474	3.74e-05	0.127	GCACTCTTTCCGAGG	0	IP_peak_8218	chr3A	17486528	17486864	337	17486698	24.23	12.6151	25.6079	20.8051	Promoter (<=1kb)	chr3A	17484446	17486006	1561	3	-	TraesCS3A02G031800	TraesCS3A02G031800.1	-692
GCACGSAWHYCGAGG	MEME-1	chr7B	479490727	479490741	+	8.14474	3.74e-05	0.127	CCACGCTTCCCGAGG	0	IP_peak_26912	chr7B	479490545	479490880	336	479490728	17.31	13.9514	25.0344	20.2552	Promoter (<=1kb)	chr7B	479491674	479493887	2214	5	+	TraesCS7B02G258900	TraesCS7B02G258900.1	-946
GCACGSAWHYCGAGG	MEME-1	chr5B	648357623	648357637	-	8.14474	3.74e-05	0.127	CCACGCTTCCCGAGG	-106	IP_peak_19227	chr5B	648357613	648357840	228	648357743	22.5	5.70073	12.3357	8.22204	Promoter (<=1kb)	chr5B	648358527	648360209	1683	3	+	TraesCS5B02G476000	TraesCS5B02G476000.1	-784
GCACGSAWHYCGAGG	MEME-1	chr7B	354240534	354240548	+	8.10526	3.79e-05	0.128	TCGCGGATCCCGAGG	-3	IP_peak_26717	chr7B	354240399	354240627	229	354240551	15.58	13.5539	23.8384	19.1086	Promoter (<=1kb)	chr7B	354241311	354289258	47948	12	+	TraesCS7B02G198600	TraesCS7B02G198600.1	-760
GCACGSAWHYCGAGG	MEME-1	chr1B	531874476	531874490	+	8.10526	3.79e-05	0.128	GCAAGCTTCTCGAGG	23	IP_peak_2184	chr1B	531874379	531874657	279	531874453	22.5	11.7498	22.8283	18.1251	Promoter (1-2kb)	chr1B	531875952	531876389	438	1	+	TraesCS1B02G536300LC	TraesCS1B02G536300LC.1	-1499
GCACGSAWHYCGAGG	MEME-1	chr3A	56766841	56766855	-	8.07895	3.82e-05	0.129	GCACAGACACCAAGA	-19	IP_peak_8344	chr3A	56766646	56767093	448	56766874	9.52	8.60092	13.1644	8.96993	Promoter (1-2kb)	chr3A	56768344	56769111	768	1	+	TraesCS3A02G109800LC	TraesCS3A02G109800LC.1	-1470
GCACGSAWHYCGAGG	MEME-1	chr3B	672392474	672392488	-	8	3.92e-05	0.131	GAACAGTTTTCGAGA	0	IP_peak_10980	chr3B	672392397	672392769	373	672392486	11.25	5.79166	8.55828	4.84154	Promoter (1-2kb)	chr3B	672385607	672391170	5564	15	-	TraesCS3B02G433500	TraesCS3B02G433500.1	-1316
GCACGSAWHYCGAGG	MEME-1	chr3B	781209745	781209759	+	7.96053	3.97e-05	0.132	GCACGCAGTTCAATA	-112	IP_peak_11240	chr3B	781209703	781210025	323	781209871	9.52	9.01706	14.4095	10.138	Promoter (<=1kb)	chr3B	781210504	781211623	1120	2	+	TraesCS3B02G543600	TraesCS3B02G543600.1	-633
GCACGSAWHYCGAGG	MEME-1	chr6D	267528969	267528983	+	7.94737	3.99e-05	0.133	GCACATATTCCAAGA	0	IP_peak_23903	chr6D	267528832	267529162	331	267528978	18.17	12.8621	23.163	18.4555	Promoter (1-2kb)	chr6D	267520682	267527428	6747	10	-	TraesCS6D02G193400	TraesCS6D02G193400.1	-1550
GCACGSAWHYCGAGG	MEME-1	chr3D	544072002	544072016	-	7.93421	4.01e-05	0.133	TCACGCTTTCCGAGG	1	IP_peak_12421	chr3D	544071863	544072118	256	544072001	8.65	7.89335	11.5118	7.43095	Promoter (1-2kb)	chr3D	544060812	544070115	9304	8	-	TraesCS3D02G429500	TraesCS3D02G429500.1	-1886
GCACGSAWHYCGAGG	MEME-1	chr2B	178649635	178649649	-	7.88158	4.08e-05	0.135	TCACGCTTTTCGAGG	0	IP_peak_5659	chr2B	178649544	178649828	285	178649645	16.44	10.4503	17.7925	13.369	Promoter (1-2kb)	chr2B	178650884	178651324	441	1	+	TraesCS2B02G272100LC	TraesCS2B02G272100LC.1	-1239
GCACGSAWHYCGAGG	MEME-1	chr3A	22555485	22555499	-	7.82895	4.14e-05	0.137	GCGTGAAAATCGAAG	201	IP_peak_8241	chr3A	22555125	22555707	583	22555284	23.36	6.09123	13.5895	9.38235	Promoter (1-2kb)	chr3A	22553370	22553972	603	1	-	TraesCS3A02G046400LC	TraesCS3A02G046400LC.1	-1312
GCACGSAWHYCGAGG	MEME-1	chr7D	461089007	461089021	+	7.81579	4.16e-05	0.137	TCACGGATCTCGATG	0	IP_peak_28474	chr7D	461088860	461089142	283	461089016	9.52	7.27444	10.2419	6.26689	Promoter (<=1kb)	chr7D	461089400	461121455	32056	6	+	TraesCS7D02G357700	TraesCS7D02G357700.1	-384
GCACGSAWHYCGAGG	MEME-1	chr6B	685149811	685149825	-	7.73684	4.27e-05	0.14	GCACACATTTCTAGA	0	IP_peak_23284	chr6B	685149768	685149994	227	685149825	13.85	7.01909	10.7291	6.7344	Promoter (1-2kb)	chr6B	685151286	685153392	2107	4	+	TraesCS6B02G411100	TraesCS6B02G411100.1	-1461
GCACGSAWHYCGAGG	MEME-1	chr4B	14015666	14015680	-	7.72368	4.28e-05	0.141	GCATGCACCACAAGG	10	IP_peak_14344	chr4B	14015606	14015846	241	14015656	6.06	5.56759	7.81133	4.17224	Promoter (<=1kb)	chr4B	14015842	14016215	374	2	+	TraesCS4B02G019900LC	TraesCS4B02G019900LC.1	-186
GCACGSAWHYCGAGG	MEME-1	chr7A	29647832	29647846	-	7.69737	4.32e-05	0.141	GCACGGAAATCTATA	191	IP_peak_24488	chr7A	29647593	29647877	285	29647641	7.79	5.26548	6.25917	2.90391	Promoter (1-2kb)	chr7A	29649462	29652591	3130	3	+	TraesCS7A02G060200	TraesCS7A02G060200.1	-1821
GCACGSAWHYCGAGG	MEME-1	chr2D	108625377	108625391	-	7.53947	4.53e-05	0.147	GCACGCGTTCCAATA	0	IP_peak_7193	chr2D	108625240	108625543	304	108625383	17.31	13.0634	23.1065	18.4003	Promoter (1-2kb)	chr2D	108623744	108624286	543	1	-	TraesCS2D02G180500LC	TraesCS2D02G180500LC.1	-1097
GCACGSAWHYCGAGG	MEME-1	chr3D	332489775	332489789	+	7.52632	4.54e-05	0.147	ACACATTTCCCGATG	0	IP_peak_12019	chr3D	332488817	332489943	1127	332489780	16.44	14.8013	27.35	22.4677	Promoter (1-2kb)	chr3D	332490792	332494041	3250	4	+	TraesCS3D02G240000	TraesCS3D02G240000.1	-1012
GCACGSAWHYCGAGG	MEME-1	chr2D	188506427	188506441	+	7.51316	4.56e-05	0.148	ACACACATCCCAATG	17	IP_peak_7355	chr2D	188506267	188506536	270	188506410	17.31	7.83005	14.0791	9.85206	Promoter (1-2kb)	chr2D	188502553	188505394	2842	8	-	TraesCS2D02G220900	TraesCS2D02G220900.1	-1016
GCACGSAWHYCGAGG	MEME-1	chr2A	530675580	530675594	+	7.51316	4.56e-05	0.148	ACACACATCCCAATG	213	IP_peak_4577	chr2A	530675301	530675602	302	530675367	6.06	5.20154	6.97051	3.48617	Promoter (<=1kb)	chr2A	530675844	530676948	1105	2	+	TraesCS2A02G308500	TraesCS2A02G308500.1	-477
GCACGSAWHYCGAGG	MEME-1	chr5A	8907738	8907752	-	7.47368	4.62e-05	0.149	GCATGGGCATCGAGA	-7	IP_peak_16511	chr5A	8907399	8907819	421	8907759	6.92	5.74491	6.79464	3.35747	Promoter (<=1kb)	chr5A	8903925	8907284	3360	2	-	TraesCS5A02G013100	TraesCS5A02G013100.1	-475
GCACGSAWHYCGAGG	MEME-1	chr2B	90779824	90779838	+	7.46053	4.64e-05	0.15	GCACACATATCGTGG	-61	IP_peak_5480	chr2B	90779687	90779921	235	90779899	6.92	4.74699	5.17727	2.0496	Promoter (1-2kb)	chr2B	90778101	90778613	513	1	-	TraesCS2B02G169000LC	TraesCS2B02G169000LC.1	-1286
GCACGSAWHYCGAGG	MEME-1	chr4A	542269161	542269175	+	7.43421	4.68e-05	0.151	ACACGATTTCCTAGG	4	IP_peak_13776	chr4A	542269047	542269283	237	542269157	19.04	6.67937	13.1909	8.99136	Promoter (<=1kb)	chr4A	542269885	542283319	13435	27	+	TraesCS4A02G233400	TraesCS4A02G233400.1	-728
GCACGSAWHYCGAGG	MEME-1	chr7B	552582946	552582960	+	7.43421	4.68e-05	0.151	GCTCGATTCCCAATG	-64	IP_peak_27072	chr7B	552582861	552583189	329	552583024	19.9	17.9187	34.023	28.8141	Promoter (<=1kb)	chr7B	552582221	552582907	687	1	-	TraesCS7B02G515100LC	TraesCS7B02G515100LC.1	-117
GCACGSAWHYCGAGG	MEME-1	chr3A	62449673	62449687	+	7.21053	5.01e-05	0.16	ACACAAATATCAATG	65	IP_peak_8361	chr3A	62449412	62449819	408	62449608	11.25	9.66363	15.6574	11.3383	Promoter (<=1kb)	chr3A	62445661	62448885	3225	7	-	TraesCS3A02G097000	TraesCS3A02G097000.2	-723
GCACGSAWHYCGAGG	MEME-1	chr3D	439528289	439528303	+	7.18421	5.05e-05	0.161	GCACGTTTTTCAAAG	81	IP_peak_12223	chr3D	439528107	439528427	321	439528208	11.25	7.64589	11.5649	7.48365	Promoter (<=1kb)	chr3D	439525191	439527377	2187	3	-	TraesCS3D02G327100	TraesCS3D02G327100.2	-831
GCACGSAWHYCGAGG	MEME-1	chr5D	51924058	51924072	+	7.07895	5.22e-05	0.165	GCACAAATTACAAAG	-3	IP_peak_19580	chr5D	51923933	51924477	545	51924075	6.92	5.4791	6.32584	2.93935	Promoter (<=1kb)	chr5D	51921002	51923300	2299	4	-	TraesCS5D02G055200	TraesCS5D02G055200.1	-775
GCACGSAWHYCGAGG	MEME-1	chr6B	692336185	692336199	-	7.07895	5.22e-05	0.165	GCACAAATTACAAAG	113	IP_peak_23309	chr6B	692336022	692336408	387	692336072	9.52	5.25952	6.95302	3.47631	Promoter (1-2kb)	chr6B	692337980	692340421	2442	5	+	TraesCS6B02G421700	TraesCS6B02G421700.1	-1908
GCACGSAWHYCGAGG	MEME-1	chr6B	680134117	680134131	-	7.06579	5.24e-05	0.165	GCTCAACTCCCGATG	0	IP_peak_23270	chr6B	680134001	680134271	271	680134127	14.71	13.4679	23.8603	19.1086	Promoter (<=1kb)	chr6B	680134448	680134690	243	1	+	TraesCS6B02G734100LC	TraesCS6B02G734100LC.1	-321
GCACGSAWHYCGAGG	MEME-1	chr7A	518524899	518524913	-	6.97368	5.4e-05	0.169	TCACGTATCCCGAGG	-68	IP_peak_25466	chr7A	518524771	518525225	455	518524981	10.38	8.39049	12.6661	8.49512	Promoter (<=1kb)	chr7A	518522965	518524773	1809	1	-	TraesCS7A02G353900	TraesCS7A02G353900.1	-208
GCACGSAWHYCGAGG	MEME-1	chr1B	637948198	637948212	+	6.94737	5.45e-05	0.17	GCACGCATCCCCATG	0	IP_peak_2426	chr1B	637948073	637948369	297	637948211	25.96	8.98701	19.6141	15.091	Promoter (<=1kb)	chr1B	637948814	637949773	960	1	+	TraesCS1B02G412000	TraesCS1B02G412000.1	-603
GCACGSAWHYCGAGG	MEME-1	chr5D	538792011	538792025	-	6.90789	5.51e-05	0.172	ACACGCATCCCTATG	2	IP_peak_20589	chr5D	538791904	538792127	224	538792009	13.85	6.34958	9.71042	5.80193	Promoter (<=1kb)	chr5D	538787661	538791714	4054	5	-	TraesCS5D02G516200	TraesCS5D02G516200.1	-295
GCACGSAWHYCGAGG	MEME-1	chr5A	436627892	436627906	+	6.81579	5.68e-05	0.176	ACACATAAATCAAGG	-85	IP_peak_17258	chr5A	436627718	436628117	400	436627991	6.92	4.74699	5.17727	2.0496	Promoter (1-2kb)	chr5A	436623854	436626872	3019	9	-	TraesCS5A02G219900	TraesCS5A02G219900.2	-1119
GCACGSAWHYCGAGG	MEME-1	chr2A	62715964	62715978	+	6.78947	5.72e-05	0.178	GCGCGGGATTCTATG	228	IP_peak_3823	chr2A	62715736	62715978	243	62715736	8.65	4.12888	4.94103	1.88837	Promoter (1-2kb)	chr2A	62717373	62717735	363	1	+	TraesCS2A02G115800LC	TraesCS2A02G115800LC.1	-1637
GCACGSAWHYCGAGG	MEME-1	chr1D	229882789	229882803	+	6.75	5.79e-05	0.179	GCACGCATTTCAAAA	-76	IP_peak_2984	chr1D	229882788	229883033	246	229882879	7.79	7.31924	10.2623	6.2839	Promoter (<=1kb)	chr1D	229879805	229882659	2855	13	-	TraesCS1D02G162000	TraesCS1D02G162000.1	-220
GCACGSAWHYCGAGG	MEME-1	chr1A	297875619	297875633	+	6.75	5.79e-05	0.179	GCACGCATTTCAAAA	-12	IP_peak_558	chr1A	297875529	297875921	393	297875645	12.98	6.99026	10.1966	6.23501	Promoter (<=1kb)	chr1A	297872019	297874932	2914	14	-	TraesCS1A02G164900	TraesCS1A02G164900.1	-713
GCACGSAWHYCGAGG	MEME-1	chr1B	198151770	198151784	+	6.68421	5.91e-05	0.183	GCACGTTATTTGATG	82	IP_peak_1655	chr1B	198151576	198151811	236	198151688	11.25	6.12489	9.08008	5.30512	Promoter (1-2kb)	chr1B	198146448	198150035	3588	7	-	TraesCS1B02G144800	TraesCS1B02G144800.2	-1653
GCACGSAWHYCGAGG	MEME-1	chr5A	451879543	451879557	+	6.61842	6.03e-05	0.186	GCACGTTCTCCAATG	-21	IP_peak_17308	chr5A	451879446	451879825	380	451879578	16.44	8.721	14.9606	10.6567	Promoter (<=1kb)	chr5A	451880134	451883804	3671	9	+	TraesCS5A02G236300	TraesCS5A02G236300.1	-556
GCACGSAWHYCGAGG	MEME-1	chr7A	592264861	592264875	-	6.48684	6.27e-05	0.192	GCATGAATTTCAAAG	0	IP_peak_25649	chr7A	592264762	592265080	319	592264875	25.96	8.98701	19.6141	15.091	Promoter (1-2kb)	chr7A	592261664	592263094	1431	1	-	TraesCS7A02G576300LC	TraesCS7A02G576300LC.1	-1781
GCACGSAWHYCGAGG	MEME-1	chr1B	677318748	677318762	+	6.48684	6.27e-05	0.192	GCACTGATCCCAAGG	0	IP_peak_2539	chr1B	677318590	677318927	338	677318759	21.63	13.5612	25.1685	20.3877	Promoter (<=1kb)	chr1B	677319109	677324053	4945	2	+	TraesCS1B02G467700	TraesCS1B02G467700.1	-350
GCACGSAWHYCGAGG	MEME-1	chr2B	474408834	474408848	+	6.46053	6.32e-05	0.193	GCACGAATCCCCATG	-26	IP_peak_6172	chr2B	474408711	474408961	251	474408874	11.25	10.3952	17.7347	13.3126	Promoter (<=1kb)	chr2B	474407879	474408502	624	1	-	TraesCS2B02G520200LC	TraesCS2B02G520200LC.1	-372
GCACGSAWHYCGAGG	MEME-1	chr5A	584714789	584714803	+	6.46053	6.32e-05	0.193	GCGCATAACTCTAGG	128	IP_peak_17652	chr5A	584714605	584714956	352	584714661	6.06	5.20154	6.97051	3.48617	Promoter (1-2kb)	chr5A	584716347	584717845	1499	2	+	TraesCS5A02G387900	TraesCS5A02G387900.1	-1686
GCACGSAWHYCGAGG	MEME-1	chr5A	299504807	299504821	+	6.42105	6.4e-05	0.195	ACACGGTAATCAAGA	-9	IP_peak_17017	chr5A	299504713	299505011	299	299504830	6.92	5.4791	6.32584	2.93935	Promoter (<=1kb)	chr5A	299502611	299504580	1970	2	-	TraesCS5A02G132900	TraesCS5A02G132900.1	-250
GCACGSAWHYCGAGG	MEME-1	chr7A	514672879	514672893	+	6.38158	6.48e-05	0.197	GCATAGAATACAATG	194	IP_peak_25455	chr7A	514672622	514673007	386	514672685	8.65	4.2505	5.11571	2.0135	Promoter (<=1kb)	chr7A	514670911	514672240	1330	3	-	TraesCS7A02G351100	TraesCS7A02G351100.1	-445
GCACGSAWHYCGAGG	MEME-1	chr4D	348397628	348397642	+	6.36842	6.5e-05	0.197	ACACGCATCTCAAAG	-69	IP_peak_16068	chr4D	348397587	348397841	255	348397711	12.98	9.97592	15.1091	10.802	Promoter (1-2kb)	chr4D	348398923	348403450	4528	9	+	TraesCS4D02G292400LC	TraesCS4D02G292400LC.1	-1212
GCACGSAWHYCGAGG	MEME-1	chr7A	694025721	694025735	-	6.36842	6.5e-05	0.197	GCACAAAATCCTAGA	-19	IP_peak_25921	chr7A	694025568	694025904	337	694025754	7.79	7.31924	10.2623	6.2839	Promoter (1-2kb)	chr7A	694027617	694028948	1332	4	+	TraesCS7A02G717800LC	TraesCS7A02G717800LC.1	-1863
GCACGSAWHYCGAGG	MEME-1	chr7A	447285200	447285214	-	6.28947	6.65e-05	0.201	GCCCAAAAATCGAGG	0	IP_peak_25311	chr7A	447285176	447285435	260	447285211	14.71	7.85563	12.5229	8.39108	Promoter (1-2kb)	chr7A	447281671	447283306	1636	3	-	TraesCS7A02G454800LC	TraesCS7A02G454800LC.1	-1905
GCACGSAWHYCGAGG	MEME-1	chr3A	565779686	565779700	+	6.28947	6.65e-05	0.201	GCACGGATCCCAAGC	1	IP_peak_9228	chr3A	565779526	565779845	320	565779685	16.44	8.721	14.9606	10.6567	Promoter (<=1kb)	chr3A	565774360	565779474	5115	4	-	TraesCS3A02G322200	TraesCS3A02G322200.1	-211
GCACGSAWHYCGAGG	MEME-1	chr1D	62690852	62690866	-	6.03947	7.16e-05	0.215	GAACAGACTCCAAGG	89	IP_peak_2761	chr1D	62690638	62690867	230	62690763	7.79	5.06254	5.95364	2.69714	Promoter (<=1kb)	chr1D	62691716	62693208	1493	2	+	TraesCS1D02G080000	TraesCS1D02G080000.1	-953
GCACGSAWHYCGAGG	MEME-1	chr4A	202018690	202018704	+	6.03947	7.16e-05	0.215	GTGCGGCTAACGATG	14	IP_peak_13100	chr4A	202018573	202018813	241	202018676	5.19	4.28221	5.12651	2.0135	Promoter (1-2kb)	chr4A	202016541	202016852	312	1	-	TraesCS4A02G163900LC	TraesCS4A02G163900LC.1	-1824
GCACGSAWHYCGAGG	MEME-1	chr3A	683361626	683361640	+	5.93421	7.39e-05	0.22	ACACGAATCCCAAAG	14	IP_peak_9552	chr3A	683361502	683361739	238	683361612	12.12	4.37172	6.6833	3.25404	Promoter (<=1kb)	chr3A	683362223	683364931	2709	5	+	TraesCS3A02G441100	TraesCS3A02G441100.1	-611
GCACGSAWHYCGAGG	MEME-1	chr4A	579607755	579607769	+	5.89474	7.47e-05	0.222	GCGCCCGCCCCGAGG	0	IP_peak_13867	chr4A	579607610	579607877	268	579607764	17.31	10.1547	17.8529	13.4284	Promoter (1-2kb)	chr4A	579609312	579612899	3588	2	+	TraesCS4A02G267300	TraesCS4A02G267300.1	-1548
GCACGSAWHYCGAGG	MEME-1	chr5B	618744372	618744386	-	5.88158	7.5e-05	0.223	GCGCCAATCCCGAAG	1	IP_peak_19172	chr5B	618744212	618744489	278	618744371	6.92	6.79165	9.21445	5.3363	Promoter (<=1kb)	chr5B	618743433	618743759	327	1	-	TraesCS5B02G647400LC	TraesCS5B02G647400LC.1	-612
GCACGSAWHYCGAGG	MEME-1	chr5B	325095472	325095486	+	5.86842	7.53e-05	0.223	ACATACTTATCGATG	3	IP_peak_18559	chr5B	325095325	325095569	245	325095469	6.06	5.37835	7.35958	3.85322	Promoter (<=1kb)	chr5B	325096011	325099076	3066	1	+	TraesCS5B02G296400LC	TraesCS5B02G296400LC.1	-542
GCACGSAWHYCGAGG	MEME-1	chr5D	369869349	369869363	+	5.80263	7.68e-05	0.227	GCACACTTCCCGAGC	10	IP_peak_20121	chr5D	369869188	369869458	271	369869339	11.25	10.3952	17.7347	13.3126	Promoter (<=1kb)	chr5D	369870042	369870804	763	1	+	TraesCS5D02G265500	TraesCS5D02G265500.1	-703
GCACGSAWHYCGAGG	MEME-1	chr7A	299325852	299325866	+	5.73684	7.83e-05	0.231	GCGCGTACCCCTAGG	33	IP_peak_25108	chr7A	299325766	299326112	347	299325819	4.33	4.56623	6.03134	2.69714	Promoter (<=1kb)	chr7A	299324251	299324916	666	3	-	TraesCS7A02G279800	TraesCS7A02G279800.1	-903
GCACGSAWHYCGAGG	MEME-1	chr3A	432040113	432040127	-	5.65789	8.01e-05	0.235	GCTCGATTACCAAGA	-2	IP_peak_8974	chr3A	432039972	432040223	252	432040129	7.79	7.31924	10.2623	6.2839	Promoter (<=1kb)	chr3A	432040315	432043798	3484	6	+	TraesCS3A02G231500	TraesCS3A02G231500.1	-186
GCACGSAWHYCGAGG	MEME-1	chr7A	163618990	163619004	-	5.64474	8.04e-05	0.236	GCACGTGCCCCTAGG	-76	IP_peak_24856	chr7A	163618963	163619215	253	163619080	5.19	4.56375	5.67501	2.48554	Promoter (1-2kb)	chr7A	163615316	163617924	2609	2	-	TraesCS7A02G201900	TraesCS7A02G201900.1	-1156
GCACGSAWHYCGAGG	MEME-1	chr3A	63477560	63477574	-	5.52632	8.33e-05	0.243	TCGCGCTTCCCGAGG	-6	IP_peak_8363	chr3A	63477442	63477761	320	63477580	12.98	9.66821	14.5322	10.2469	Promoter (<=1kb)	chr3A	63476129	63477024	896	3	-	TraesCS3A02G098300	TraesCS3A02G098300.1	-556
GCACGSAWHYCGAGG	MEME-1	chr4D	325892401	325892415	-	5.52632	8.33e-05	0.243	CCGCGCTTCCCGAGG	-46	IP_peak_16043	chr4D	325892338	325892585	248	325892461	10.38	7.87288	11.6355	7.5455	Promoter (<=1kb)	chr4D	325890882	325891946	1065	1	-	TraesCS4D02G187200	TraesCS4D02G187200.1	-515
GCACGSAWHYCGAGG	MEME-1	chr6D	436089924	436089938	-	5.52632	8.33e-05	0.243	TCGCGCTTCCCGAGG	-24	IP_peak_24236	chr6D	436089855	436090527	673	436089962	6.06	6.04984	9.21445	5.3363	Promoter (<=1kb)	chr6D	436090919	436095234	4316	2	+	TraesCS6D02G333900	TraesCS6D02G333900.1	-957
GCACGSAWHYCGAGG	MEME-1	chr3D	511667482	511667496	+	5.52632	8.33e-05	0.243	CCGCGCTTCCCGAGG	59	IP_peak_12354	chr3D	511667354	511667580	227	511667423	7.79	7.53345	10.897	6.85299	Promoter (1-2kb)	chr3D	511669364	511669624	261	1	+	TraesCS3D02G483100LC	TraesCS3D02G483100LC.1	-1941
GCACGSAWHYCGAGG	MEME-1	chr1A	536070546	536070560	-	5.52632	8.33e-05	0.243	TCGCGCTTCCCGAGG	-61	IP_peak_1066	chr1A	536070488	536070907	420	536070621	8.65	7.61561	10.8166	6.81219	Promoter (1-2kb)	chr1A	536067155	536068747	1593	1	-	TraesCS1A02G351600	TraesCS1A02G351600.1	-1874
GCACGSAWHYCGAGG	MEME-1	chr2B	663828209	663828223	-	5.52632	8.33e-05	0.243	TCGCGCTTCCCGAGG	-65	IP_peak_6537	chr2B	663828168	663828396	229	663828288	8.65	8.19211	12.3666	8.24803	Promoter (<=1kb)	chr2B	663828892	663830333	1442	2	+	TraesCS2B02G467700	TraesCS2B02G467700.1	-604
GCACGSAWHYCGAGG	MEME-1	chr3A	676907612	676907626	-	5.52632	8.33e-05	0.243	TCGCGCTTCCCGAGG	77	IP_peak_9531	chr3A	676907284	676907725	442	676907535	6.92	6.03781	7.35958	3.85322	Promoter (1-2kb)	chr3A	676885723	676906060	20338	5	-	TraesCS3A02G434900	TraesCS3A02G434900.1	-1475
GCACGSAWHYCGAGG	MEME-1	chr6A	108219261	108219275	+	5.48684	8.43e-05	0.245	GCATGCATCACAAAG	69	IP_peak_20986	chr6A	108219042	108219292	251	108219192	6.06	6.04984	9.21445	5.3363	Promoter (1-2kb)	chr6A	108215808	108217312	1505	3	-	TraesCS6A02G137500	TraesCS6A02G137500.1	-1880
GCACGSAWHYCGAGG	MEME-1	chr5D	47022388	47022402	-	5.47368	8.46e-05	0.246	GCTCGATTTACAATG	122	IP_peak_19567	chr5D	47022166	47022581	416	47022266	4.33	4.3555	5.41801	2.24976	Promoter (<=1kb)	chr5D	47015248	47022008	6761	3	-	TraesCS5D02G049300	TraesCS5D02G049300.1	-258
GCACGSAWHYCGAGG	MEME-1	chr5A	433517354	433517368	-	5.44737	8.53e-05	0.246	GCCCGTTTCCCGAGG	-2	IP_peak_17249	chr5A	433517132	433517561	430	433517370	21.63	18.5069	35.48	30.2419	Promoter (<=1kb)	chr5A	433517936	433519104	1169	1	+	TraesCS5A02G216800	TraesCS5A02G216800.1	-566
GCACGSAWHYCGAGG	MEME-1	chr6A	124299741	124299755	+	5.42105	8.6e-05	0.248	AAACAAAAAACGAGG	223	IP_peak_21033	chr6A	124299220	124299832	613	124299518	11.25	10.5007	18.0879	13.6263	Promoter (<=1kb)	chr6A	124299941	124302869	2929	7	+	TraesCS6A02G145800	TraesCS6A02G145800.1	-423
GCACGSAWHYCGAGG	MEME-1	chr4A	72293674	72293688	+	5.35526	8.76e-05	0.251	GCGCAACTCCCGATA	50	IP_peak_12890	chr4A	72293427	72293710	284	72293624	6.92	6.1422	7.57644	3.97097	Promoter (<=1kb)	chr4A	72293719	72296678	2960	4	+	TraesCS4A02G073300	TraesCS4A02G073300.1	-95
GCACGSAWHYCGAGG	MEME-1	chr4A	542487426	542487440	+	5.34211	8.79e-05	0.252	CCACGTTTCCCGAGG	62	IP_peak_13778	chr4A	542487231	542487527	297	542487364	11.25	7.14837	10.7241	6.73121	Promoter (1-2kb)	chr4A	542488824	542490266	1443	2	+	TraesCS4A02G383000LC	TraesCS4A02G383000LC.1	-1460
GCACGSAWHYCGAGG	MEME-1	chr3D	169422399	169422413	-	5.31579	8.86e-05	0.253	CCGCGCTTTCCGAGG	0	IP_peak_11844	chr3D	169422356	169422671	316	169422407	7.79	6.07755	7.58236	3.97097	Promoter (<=1kb)	chr3D	169423380	169428670	5291	6	+	TraesCS3D02G183800	TraesCS3D02G183800.1	-973
GCACGSAWHYCGAGG	MEME-1	chr7A	255583471	255583485	-	5.25	9.03e-05	0.257	GCGCTATTCCCGAGG	3	IP_peak_25021	chr7A	255583340	255583574	235	255583468	19.9	10.4517	18.7993	14.3011	Promoter (1-2kb)	chr7A	255578532	255581871	3340	6	-	TraesCS7A02G261300	TraesCS7A02G261300.2	-1597
GCACGSAWHYCGAGG	MEME-1	chr2D	509951591	509951605	-	5.18421	9.2e-05	0.262	GCACATGTTTCAAGA	2	IP_peak_7896	chr2D	509951436	509951708	273	509951589	8.65	7.35675	10.2315	6.26651	Promoter (1-2kb)	chr2D	509953493	509955933	2441	8	+	TraesCS2D02G398000	TraesCS2D02G398000.1	-1904
GCACGSAWHYCGAGG	MEME-1	chr6B	4496422	4496436	+	5.13158	9.34e-05	0.264	ACGCGTATCACGAGA	-91	IP_peak_22064	chr6B	4496420	4496735	316	4496527	7.79	4.39416	4.98931	1.91819	Promoter (<=1kb)	chr6B	4489898	4495887	5990	11	-	TraesCS6B02G006400	TraesCS6B02G006400.1	-640
GCACGSAWHYCGAGG	MEME-1	chr6D	28997197	28997211	+	5.13158	9.34e-05	0.264	TCACGTTTTCCGAGG	118	IP_peak_23528	chr6D	28996954	28997565	612	28997079	9.52	7.50596	10.6819	6.68996	Promoter (1-2kb)	chr6D	28998188	29001661	3474	8	+	TraesCS6D02G062200	TraesCS6D02G062200.1	-1109
GCACGSAWHYCGAGG	MEME-1	chr3D	48542295	48542309	-	5.13158	9.34e-05	0.264	ACACAATTTTCAATG	20	IP_peak_11594	chr3D	48542186	48542444	259	48542275	12.12	6.2008	9.62777	5.72452	Promoter (1-2kb)	chr3D	48543331	48543795	465	1	+	TraesCS3D02G095700	TraesCS3D02G095700.1	-1056
GCACGSAWHYCGAGG	MEME-1	chr7D	287897304	287897318	-	5.06579	9.52e-05	0.268	TCACGCATTTCAAGG	0	IP_peak_28208	chr7D	287897108	287897388	281	287897307	12.12	7.85788	12.3327	8.21914	Promoter (<=1kb)	chr7D	287897903	287902678	4776	6	+	TraesCS7D02G282400	TraesCS7D02G282400.2	-596
GCACGSAWHYCGAGG	MEME-1	chr3D	443599368	443599382	-	5.06579	9.52e-05	0.268	GCATGAATTTCAATA	89	IP_peak_12237	chr3D	443599233	443599515	283	443599279	9.52	4.49899	5.82037	2.62029	Promoter (<=1kb)	chr3D	443599740	443600084	345	1	+	TraesCS3D02G418400LC	TraesCS3D02G418400LC.1	-461
GCACGSAWHYCGAGG	MEME-1	chr5A	485471057	485471071	+	5.01316	9.66e-05	0.272	GCACCGGCCCCAAGG	-106	IP_peak_17413	chr5A	485470983	485471254	272	485471177	15.58	9.6733	15.9562	11.6297	Promoter (1-2kb)	chr5A	485468196	485469889	1694	2	-	TraesCS5A02G276400	TraesCS5A02G276400.1	-1288
GCACGSAWHYCGAGG	MEME-1	chr5A	546761930	546761944	+	5.01316	9.66e-05	0.272	GCATAAATATTGATG	154	IP_peak_17557	chr5A	546761714	546761965	252	546761776	6.06	5.03599	6.6293	3.20911	Promoter (<=1kb)	chr5A	546762763	546764160	1398	1	+	TraesCS5A02G474600LC	TraesCS5A02G474600LC.1	-987
GCACGSAWHYCGAGG	MEME-1	chr3D	475307323	475307337	+	4.94737	9.84e-05	0.276	TCTCGGATCCCGAGG	-1	IP_peak_12299	chr3D	475307198	475307548	351	475307338	10.38	8.82568	13.6314	9.42243	Promoter (<=1kb)	chr3D	475306227	475306436	210	1	-	TraesCS3D02G443700LC	TraesCS3D02G443700LC.1	-902
GCACGSAWHYCGAGG	MEME-1	chr1B	614496786	614496800	-	4.90789	9.96e-05	0.278	GCATGAATTTTGAGA	-62	IP_peak_2373	chr1B	614496735	614496966	232	614496862	6.06	5.47133	7.57644	3.97097	Promoter (1-2kb)	chr1B	614498715	614499045	331	2	+	TraesCS1B02G651500LC	TraesCS1B02G651500LC.1	-1853
WCTCCGGCGAG	MEME-2	chr1A	201535782	201535792	-	14.561	5.49e-06	0.0789	CCTCCGGCGAG	56	IP_peak_425	chr1A	201535539	201535803	265	201535726	5.19	5.06307	6.85018	3.3933	Promoter (<=1kb)	chr1A	201536544	201537176	633	1	+	TraesCS1A02G209900LC	TraesCS1A02G209900LC.1	-818
WCTCCGGCGAG	MEME-2	chr4B	185911691	185911701	+	13.439	1.16e-05	0.135	TCTCTGGCGAA	139	IP_peak_14658	chr4B	185911479	185911730	252	185911552	5.19	4.28221	5.12651	2.0135	Promoter (<=1kb)	chr4B	185907898	185911254	3357	3	-	TraesCS4B02G141300	TraesCS4B02G141300.1	-298
WCTCCGGCGAG	MEME-2	chr4A	699004002	699004012	+	12.6463	1.65e-05	0.18	TCTCCGGCTAG	-55	IP_peak_14170	chr4A	699003954	699004204	251	699004067	7.79	6.27098	7.93129	4.28499	Promoter (<=1kb)	chr4A	699004383	699004787	405	1	+	TraesCS4A02G428300	TraesCS4A02G428300.1	-316
WCTCCGGCGAG	MEME-2	chr2A	3845173	3845183	-	12.061	2.25e-05	0.218	GCTCCGGCAAG	-13	IP_peak_3609	chr2A	3844988	3845263	276	3845196	6.92	5.08684	5.68954	2.49828	Promoter (<=1kb)	chr2A	3834207	3844562	10356	12	-	TraesCS2A02G009600	TraesCS2A02G009600.1	-634
WCTCCGGCGAG	MEME-2	chr3A	604493427	604493437	+	12	2.32e-05	0.224	TCTCCAGTGAG	-105	IP_peak_9322	chr3A	604493388	604493693	306	604493542	8.65	7.89335	11.5118	7.43095	Promoter (<=1kb)	chr3A	604491429	604493200	1772	1	-	TraesCS3A02G494800LC	TraesCS3A02G494800LC.1	-342
WCTCCGGCGAG	MEME-2	chr2B	20309682	20309692	+	10.3537	4.9e-05	0.332	ACTCCAGTGAA	-64	IP_peak_5286	chr2B	20309557	20309948	392	20309756	13.85	7.42295	11.3449	7.27452	Promoter (1-2kb)	chr2B	20308339	20308629	291	1	-	TraesCS2B02G042200LC	TraesCS2B02G042200LC.1	-1127
WCTCCGGCGAG	MEME-2	chr2B	165521486	165521496	+	10.1463	5.2e-05	0.35	ACTCCAGTGAC	-239	IP_peak_5637	chr2B	165521336	165521745	410	165521735	6.06	4.88066	6.32584	2.93935	Promoter (<=1kb)	chr2B	165522140	165523959	1820	3	+	TraesCS2B02G190200	TraesCS2B02G190200.1	-405
WCTCCGGCGAG	MEME-2	chr7A	64597716	64597726	-	10.0854	5.33e-05	0.356	ACTCCGGGGAT	0	IP_peak_24612	chr7A	64597538	64598079	542	64597721	8.65	5.10221	6.35342	2.96234	Promoter (1-2kb)	chr7A	64595213	64595752	540	1	-	TraesCS7A02G106200	TraesCS7A02G106200.1	-1969
WCTCCGGCGAG	MEME-2	chr6B	541165333	541165343	+	9.93902	5.68e-05	0.37	AATCCGGTGAA	67	IP_peak_22996	chr6B	541165159	541165381	223	541165266	6.92	5.4791	6.32584	2.93935	Promoter (1-2kb)	chr6B	541163548	541163706	159	1	-	TraesCS6B02G560800LC	TraesCS6B02G560800LC.1	-1560
WCTCCGGCGAG	MEME-2	chr4D	425971905	425971915	+	9.82927	5.95e-05	0.383	ACTCCGGTGTA	-106	IP_peak_16222	chr4D	425971852	425972125	274	425972021	5.19	5.25471	7.4151	3.8892	Promoter (1-2kb)	chr4D	425973229	425975095	1867	3	+	TraesCS4D02G256400	TraesCS4D02G256400.1	-1208
WCTCCGGCGAG	MEME-2	chr7D	1178025	1178035	+	9.7439	6.19e-05	0.394	TTTCCGGCGAT	-67	IP_peak_27581	chr7D	1177952	1178212	261	1178102	6.92	6.79165	9.21445	5.3363	Promoter (<=1kb)	chr7D	1178315	1184766	6452	5	+	TraesCS7D02G001800LC	TraesCS7D02G001800LC.1	-213
WCTCCGGCGAG	MEME-2	chr7A	624797511	624797521	-	9.39024	6.98e-05	0.43	TCTCCGGTGCA	62	IP_peak_25715	chr7A	624797044	624797586	543	624797449	9.52	8.01622	11.7383	7.64491	Promoter (<=1kb)	chr7A	624797857	624798431	575	2	+	TraesCS7A02G429900	TraesCS7A02G429900.1	-408
WCTCCGGCGAG	MEME-2	chr7D	612778325	612778335	+	9.03659	7.94e-05	0.463	AATCCGGTGAT	-209	IP_peak_28882	chr7D	612777859	612778716	858	612778544	9.52	8.01622	11.7383	7.64491	Promoter (1-2kb)	chr7D	612779736	612781642	1907	2	+	TraesCS7D02G509200	TraesCS7D02G509200.1	-1192
WCTCCGGCGAG	MEME-2	chr2B	133022312	133022322	-	8.96341	8.18e-05	0.471	TCTCCGGTCAA	0	IP_peak_5565	chr2B	133022188	133022470	283	133022313	6.06	5.77064	8.34871	4.64755	Promoter (<=1kb)	chr2B	133006784	133021720	14937	12	-	TraesCS2B02G159500	TraesCS2B02G159500.1	-593
WCTCCGGCGAG	MEME-2	chr4B	92537281	92537291	+	8.5	9.59e-05	0.515	ATTCCAGCGAG	-33	IP_peak_14502	chr4B	92537202	92537437	236	92537324	13.85	7.42295	11.3449	7.27452	Promoter (1-2kb)	chr4B	92533528	92536179	2652	4	-	TraesCS4B02G090300	TraesCS4B02G090300.1	-1145
WCTCCGGCGAG	MEME-2	chr6A	73386091	73386101	-	8.4878	9.64e-05	0.515	TCTCTGGCGTA	-62	IP_peak_20895	chr6A	73386058	73386302	245	73386163	6.06	5.03599	6.6293	3.20911	Promoter (<=1kb)	chr6A	73383911	73385380	1470	2	-	TraesCS6A02G104300	TraesCS6A02G104300.1	-783
WCTCCGGCGAG	MEME-2	chr1D	366017368	366017378	+	8.45122	9.86e-05	0.516	ACTCCTGTGAT	-13	IP_peak_3218	chr1D	366017313	366017660	348	366017391	4.33	4.20225	5.03815	1.95372	Promoter (1-2kb)	chr1D	366018501	366020509	2009	3	+	TraesCS1D02G271800	TraesCS1D02G271800.1	-1110
MA1378.1	PLT3	chr7A	701456056	701456070	-	16.6061	5.12e-07	0.00889	CCTCGAGATTCGTAA	30	IP_peak_25940	chr7A	701455849	701456237	389	701456026	26.83	23.8531	49.1235	43.2713	Promoter (1-2kb)	chr7A	701452290	701454590	2301	2	-	TraesCS7A02G733900LC	TraesCS7A02G733900LC.1	-1436
MA1378.1	PLT3	chr1B	136625417	136625431	+	16	1.02e-06	0.013	CCTCGGAATTCGGGA	12	IP_peak_1580	chr1B	136625252	136625495	244	136625405	9.52	7.50596	10.6819	6.68996	Promoter (<=1kb)	chr1B	136625640	136628222	2583	2	+	TraesCS1B02G198000LC	TraesCS1B02G198000LC.1	-235
MA1378.1	PLT3	chr5D	267843734	267843748	+	15.3485	2.03e-06	0.0204	CATTGAGAATCGTGA	9	IP_peak_19892	chr5D	267843562	267843815	254	267843725	10.38	6.82092	9.78691	5.87046	Promoter (1-2kb)	chr5D	267844985	267855460	10476	17	+	TraesCS5D02G170900	TraesCS5D02G170900.1	-1260
MA1378.1	PLT3	chr1D	426986777	426986791	+	15.1364	2.48e-06	0.0232	CATCGGGATTCGGGA	8	IP_peak_3359	chr1D	426986626	426986898	273	426986769	27.69	7.17295	17.3804	12.9788	Promoter (<=1kb)	chr1D	426987228	426990925	3698	3	+	TraesCS1D02G337200	TraesCS1D02G337200.1	-459
MA1378.1	PLT3	chr5A	60530333	60530347	+	14.8333	3.32e-06	0.0278	CCTCGGGGAGCGTGA	0	IP_peak_16661	chr5A	60530188	60530486	299	60530338	24.23	11.9288	24.4733	19.7001	Promoter (<=1kb)	chr5A	60526352	60529809	3458	7	-	TraesCS5A02G060300	TraesCS5A02G060300.1	-529
MA1378.1	PLT3	chr2B	691013300	691013314	+	14.6515	3.93e-06	0.0309	TCTTGGGATTCGGGC	-24	IP_peak_6598	chr2B	691013202	691013480	279	691013338	13.85	10.9416	17.3506	12.95	Promoter (<=1kb)	chr2B	691007899	691012988	5090	7	-	TraesCS2B02G493400	TraesCS2B02G493400.2	-350
MA1378.1	PLT3	chr5D	395721641	395721655	-	14.5152	4.46e-06	0.0324	TCTTGGGAATCGGGC	54	IP_peak_20168	chr5D	395721439	395721720	282	395721587	12.98	6.99026	10.1966	6.23501	Promoter (<=1kb)	chr5D	395721773	395725707	3935	5	+	TraesCS5D02G298000	TraesCS5D02G298000.1	-186
MA1378.1	PLT3	chr7D	397601344	397601358	-	14.3939	4.97e-06	0.0342	CCTCGGGAATCGGAA	0	IP_peak_28349	chr7D	397601231	397601536	306	397601350	13.85	7.42295	11.3449	7.27452	Promoter (<=1kb)	chr7D	397601726	397602319	594	1	+	TraesCS7D02G430700LC	TraesCS7D02G430700LC.1	-376
MA1378.1	PLT3	chr1A	86619013	86619027	-	14.2727	5.52e-06	0.0369	TCTTGAAATACGTGA	-17	IP_peak_233	chr1A	86618942	86619240	299	86619044	12.12	5.1209	7.90674	4.26402	Promoter (1-2kb)	chr1A	86620191	86636237	16047	3	+	TraesCS1A02G130500LC	TraesCS1A02G130500LC.1	-1147
MA1378.1	PLT3	chr7B	387641405	387641419	+	14.1364	6.24e-06	0.0406	TCTTGAAAAACGTGA	60	IP_peak_26757	chr7B	387641309	387641534	226	387641345	6.92	4.18747	4.38647	1.51708	Promoter (1-2kb)	chr7B	387642384	387645427	3044	4	+	TraesCS7B02G382710LC	TraesCS7B02G382710LC.1	-1039
MA1378.1	PLT3	chr5A	501817543	501817557	-	14.1364	6.24e-06	0.0406	TCTTGGAATTCGGGC	-35	IP_peak_17446	chr5A	501817502	501817745	244	501817592	9.52	8.76067	13.6132	9.40446	Promoter (1-2kb)	chr5A	501818983	501834187	15205	10	+	TraesCS5A02G418300LC	TraesCS5A02G418300LC.1	-1391
MA1378.1	PLT3	chr7B	301583858	301583872	-	14.1212	6.33e-06	0.0411	TCTCGTAATTCGTGA	-18	IP_peak_26641	chr7B	301583824	301584051	228	301583890	6.92	6.72341	9.01018	5.25107	Promoter (1-2kb)	chr7B	301585327	301585620	294	1	+	TraesCS7B02G316600LC	TraesCS7B02G316600LC.1	-1437
MA1378.1	PLT3	chr4A	678406174	678406188	+	14.1212	6.33e-06	0.0411	TCTTGGTATGCGTGA	101	IP_peak_14109	chr4A	678405964	678406266	303	678406073	10.38	5.38251	7.52307	3.97097	Promoter (1-2kb)	chr4A	678404555	678404914	360	1	-	TraesCS4A02G405400	TraesCS4A02G405400.1	-1159
MA1378.1	PLT3	chr6B	26226427	26226441	+	13.8939	7.71e-06	0.0472	TCTGGGAATGCGTGC	7	IP_peak_22138	chr6B	26226281	26226555	275	26226420	15.58	7.83737	13.0187	8.84037	Promoter (<=1kb)	chr6B	26224613	26226280	1668	1	-	TraesCS6B02G042900	TraesCS6B02G042900.1	-140
MA1378.1	PLT3	chr7A	719930153	719930167	-	13.8333	8.08e-06	0.0485	CCTCGGGAAACGCAA	0	IP_peak_25992	chr7A	719930102	719930354	253	719930157	12.12	4.37172	6.6833	3.25404	Promoter (1-2kb)	chr7A	719931429	719932596	1168	3	+	TraesCS7A02G774300LC	TraesCS7A02G774300LC.1	-1272
MA1378.1	PLT3	chr3A	363465800	363465814	+	13.7121	8.92e-06	0.0515	CCTCGGGATGAGAGC	0	IP_peak_8853	chr3A	363465700	363465933	234	363465808	6.92	6.79165	9.21445	5.3363	Promoter (1-2kb)	chr3A	363463044	363464074	1031	3	-	TraesCS3A02G314200LC	TraesCS3A02G314200LC.1	-1734
MA1378.1	PLT3	chr1A	441957556	441957570	+	13.7121	8.92e-06	0.0515	CATCGGTTTACGTGA	22	IP_peak_818	chr1A	441957416	441957647	232	441957534	17.31	6.10245	11.2084	7.14904	Promoter (<=1kb)	chr1A	441954667	441957069	2403	3	-	TraesCS1A02G250300	TraesCS1A02G250300.1	-465
MA1378.1	PLT3	chr6B	33275379	33275393	-	13.697	9.03e-06	0.052	CCTCGGGATAAGAGC	0	IP_peak_22168	chr6B	33275225	33275466	242	33275387	19.9	10.4517	18.7993	14.3011	Promoter (1-2kb)	chr6B	33277193	33277484	292	2	+	TraesCS6B02G070300LC	TraesCS6B02G070300LC.1	-1806
MA1378.1	PLT3	chr6B	352391853	352391867	-	13.697	9.03e-06	0.052	TATGGGGATCCGTGC	2	IP_peak_22698	chr6B	352391722	352392025	304	352391851	38.08	9.76905	28.9709	24.0169	Promoter (<=1kb)	chr6B	352392420	352392764	345	1	+	TraesCS6B02G406400LC	TraesCS6B02G406400LC.1	-569
MA1378.1	PLT3	chr1D	460187959	460187973	-	13.697	9.03e-06	0.052	TTTCGAGAATCGTGT	1	IP_peak_3447	chr1D	460187877	460188112	236	460187958	9.52	6.47549	8.85078	5.1169	Promoter (<=1kb)	chr1D	460186689	460187428	740	3	-	TraesCS1D02G510100LC	TraesCS1D02G510100LC.1	-530
MA1378.1	PLT3	chr6A	260424962	260424976	-	13.5909	9.87e-06	0.0532	CCTTGAAATGTGTGA	0	IP_peak_21265	chr6A	260424758	260425030	273	260424974	5.19	5.06307	6.85018	3.3933	Promoter (<=1kb)	chr6A	260425577	260435965	10389	15	+	TraesCS6A02G192600	TraesCS6A02G192600.1	-603
MA1378.1	PLT3	chr4A	905701	905715	+	13.5	1.07e-05	0.0561	TTTCGAAATTCGTGA	42	IP_peak_12725	chr4A	905530	905881	352	905659	12.12	8.18602	12.9007	8.72611	Promoter (1-2kb)	chr4A	907552	908326	775	1	+	TraesCS4A02G001200	TraesCS4A02G001200.1	-1893
MA1378.1	PLT3	chr3D	125684459	125684473	-	13.5	1.07e-05	0.0561	TTTCGAAATTCGTGA	7	IP_peak_11770	chr3D	125684352	125684580	229	125684452	10.38	3.79481	5.08049	1.98909	Promoter (1-2kb)	chr3D	125682612	125683010	399	1	-	TraesCS3D02G180100LC	TraesCS3D02G180100LC.1	-1442
MA1378.1	PLT3	chr7B	266565514	266565528	-	13.5	1.07e-05	0.0561	TTTCGAAATTCGTGA	9	IP_peak_26590	chr7B	266565355	266565596	242	266565505	14.71	5.22466	8.39184	4.68927	Promoter (<=1kb)	chr7B	266563954	266564672	719	1	-	TraesCS7B02G179800	TraesCS7B02G179800.1	-833
MA1378.1	PLT3	chr2A	768314689	768314703	-	13.4848	1.08e-05	0.0567	CATGGGAAAACGTGC	-3	IP_peak_5173	chr2A	768314438	768314786	349	768314706	21.63	6.6404	13.6503	9.4413	Promoter (<=1kb)	chr2A	768315279	768316588	1310	2	+	TraesCS2A02G571600	TraesCS2A02G571600.1	-573
MA1378.1	PLT3	chr1A	386418091	386418105	+	13.4091	1.15e-05	0.0592	CCTCGGGATGCGGAT	-15	IP_peak_730	chr1A	386418023	386418273	251	386418120	6.92	6.47821	8.34871	4.64755	Promoter (1-2kb)	chr1A	386419704	386420896	1193	2	+	TraesCS1A02G352000LC	TraesCS1A02G352000LC.1	-1584
MA1378.1	PLT3	chr3B	495477999	495478013	+	13.3636	1.19e-05	0.0606	CCTCGGGAAACGCGG	-83	IP_peak_10689	chr3B	495477942	495478199	258	495478096	5.19	5.30804	7.58964	3.97097	Promoter (<=1kb)	chr3B	495471688	495477198	5511	18	-	TraesCS3B02G308200	TraesCS3B02G308200.1	-898
MA1378.1	PLT3	chr6D	463543827	463543841	+	13.3485	1.2e-05	0.0612	CATCGGAAAACGGGT	22	IP_peak_24336	chr6D	463543675	463543983	309	463543805	7.79	6.93294	9.28856	5.40112	Promoter (1-2kb)	chr6D	463545025	463546692	1668	1	+	TraesCS6D02G499400LC	TraesCS6D02G499400LC.1	-1220
MA1378.1	PLT3	chr3B	822781036	822781050	+	13.3333	1.22e-05	0.0612	CATTGGAAATTGTGA	4	IP_peak_11400	chr3B	822780761	822781131	371	822781032	6.92	5.65349	6.6293	3.20911	Promoter (1-2kb)	chr3B	822770397	822779230	8834	8	-	TraesCS3B02G894000LC	TraesCS3B02G894000LC.1	-1802
MA1378.1	PLT3	chr1B	662782328	662782342	-	13.3182	1.23e-05	0.0618	CATTGGGAAGCGGGC	0	IP_peak_2499	chr1B	662782134	662782456	323	662782332	19.9	15.9298	28.626	23.6789	Promoter (1-2kb)	chr1B	662783949	662786278	2330	6	+	TraesCS1B02G442000	TraesCS1B02G442000.1	-1617
MA1378.1	PLT3	chr3B	354431669	354431683	-	13.2576	1.29e-05	0.0638	TCTGGGGATCTGTGC	-8	IP_peak_10478	chr3B	354431543	354431837	295	354431691	19.04	16.3842	31.5117	26.456	Promoter (<=1kb)	chr3B	354430160	354431349	1190	2	-	TraesCS3B02G232200	TraesCS3B02G232200.1	-342
MA1378.1	PLT3	chr5D	537086395	537086409	-	13.1667	1.39e-05	0.0669	TCTCGGGAAGCGTTA	117	IP_peak_20576	chr5D	537086237	537086488	252	537086278	10.38	7.87288	11.6355	7.5455	Promoter (1-2kb)	chr5D	537087947	537089896	1950	1	+	TraesCS5D02G512900	TraesCS5D02G512900.1	-1669
MA1378.1	PLT3	chr4D	447641912	447641926	-	13.1364	1.43e-05	0.0682	CATGGGGAATTGTGC	-142	IP_peak_16265	chr4D	447641864	447642321	458	447642068	11.25	7.3394	11.0426	6.99154	Promoter (1-2kb)	chr4D	447639405	447640255	851	2	-	TraesCS4D02G378000LC	TraesCS4D02G378000LC.1	-1813
MA1378.1	PLT3	chr1B	262064188	262064202	+	13.1061	1.46e-05	0.0685	CCTTGATATGTGTGA	-120	IP_peak_1733	chr1B	262064029	262064528	500	262064322	7.79	5.80879	7.12246	3.63145	Promoter (<=1kb)	chr1B	262064780	262067463	2684	3	+	TraesCS1B02G155100	TraesCS1B02G155100.1	-458
MA1378.1	PLT3	chr4B	473580551	473580565	+	13.0909	1.48e-05	0.0685	TCTAGGGAAACGTGT	0	IP_peak_15084	chr4B	473580373	473580709	337	473580563	23.36	12.1825	24.2093	19.4412	Promoter (<=1kb)	chr4B	473578812	473580153	1342	3	-	TraesCS4B02G226600	TraesCS4B02G226600.1	-410
MA1378.1	PLT3	chr6B	612856685	612856699	+	13.0909	1.48e-05	0.0685	TCTTGAAAATTGTGT	0	IP_peak_23128	chr6B	612856600	612857005	406	612856691	10.38	6.82092	9.78691	5.87046	Promoter (<=1kb)	chr6B	612857305	612859019	1715	2	+	TraesCS6B02G348000	TraesCS6B02G348000.1	-614
MA1378.1	PLT3	chr2A	660499809	660499823	-	13.0303	1.55e-05	0.0707	CATTGGGATATGTGA	0	IP_peak_4832	chr2A	660499616	660499838	223	660499819	7.79	4.39416	4.98931	1.91819	Promoter (1-2kb)	chr2A	660501494	660505704	4211	11	+	TraesCS2A02G404800	TraesCS2A02G404800.1	-1675
MA1378.1	PLT3	chr6D	473105127	473105141	+	13	1.59e-05	0.072	CCTTGAAATACGGGA	-20	IP_peak_24374	chr6D	473105044	473105295	252	473105161	9.52	4.97337	6.52502	3.11372	Promoter (<=1kb)	chr6D	473103617	473104512	896	2	-	TraesCS6D02G407700	TraesCS6D02G407700.1	-649
MA1378.1	PLT3	chr1B	662073858	662073872	+	13	1.59e-05	0.072	TCTTGGGAAGCGTAA	45	IP_peak_2496	chr1B	662073702	662073948	247	662073813	7.79	6.07755	7.58236	3.97097	Promoter (1-2kb)	chr1B	662070660	662072601	1942	3	-	TraesCS1B02G738900LC	TraesCS1B02G738900LC.1	-1212
MA1378.1	PLT3	chr1D	453197738	453197752	-	12.9242	1.69e-05	0.0749	CCTAGGAAATCGAGA	-177	IP_peak_3425	chr1D	453197642	453198027	386	453197929	6.06	5.11743	6.79464	3.35747	Promoter (<=1kb)	chr1D	453197029	453197442	414	1	-	TraesCS1D02G498700LC	TraesCS1D02G498700LC.1	-487
MA1378.1	PLT3	chr4D	394858554	394858568	-	12.8939	1.73e-05	0.0759	TATTGAAATACGTGA	59	IP_peak_16151	chr4D	394858323	394858677	355	394858495	11.25	4.78301	6.98213	3.4955	Promoter (<=1kb)	chr4D	394857422	394857745	324	1	-	TraesCS4D02G329500LC	TraesCS4D02G329500LC.1	-750
MA1378.1	PLT3	chr1A	530168703	530168717	+	12.803	1.85e-05	0.08	CATCGGGATTTGAAC	1	IP_peak_1051	chr1A	530168583	530168839	257	530168702	19.04	7.19729	14.0941	9.8667	Promoter (1-2kb)	chr1A	530170540	530174060	3521	4	+	TraesCS1A02G339600	TraesCS1A02G339600.1	-1838
MA1378.1	PLT3	chr3D	536435378	536435392	+	12.7727	1.89e-05	0.0806	CATCGGGACTCGGGC	8	IP_peak_12404	chr3D	536435244	536435490	247	536435370	9.52	6.85175	9.48519	5.59069	Promoter (<=1kb)	chr3D	536435783	536439149	3367	4	+	TraesCS3D02G424500	TraesCS3D02G424500.1	-413
MA1378.1	PLT3	chr1B	105263668	105263682	-	12.7576	1.91e-05	0.0806	TCTTGGGATAAGTGC	-1	IP_peak_1524	chr1B	105263493	105263869	377	105263683	12.98	11.9843	19.9806	15.3886	Promoter (1-2kb)	chr1B	105257295	105261808	4514	12	-	TraesCS1B02G098700	TraesCS1B02G098700.2	-1875
MA1378.1	PLT3	chr4B	417378049	417378063	+	12.6667	2.05e-05	0.0842	CATCGGGAATTGAAC	0	IP_peak_14970	chr4B	417377955	417378197	243	417378054	17.31	9.15368	16.2172	11.8542	Promoter (1-2kb)	chr4B	417373602	417376654	3053	1	-	TraesCS4B02G349800LC	TraesCS4B02G349800LC.1	-1400
MA1378.1	PLT3	chr1D	432213808	432213822	-	12.6667	2.05e-05	0.0842	CCTCGAGAACAGCGT	-21	IP_peak_3370	chr1D	432213647	432213948	302	432213843	15.58	10.7974	17.8825	13.4576	Promoter (<=1kb)	chr1D	432213863	432214751	889	2	+	TraesCS1D02G465600LC	TraesCS1D02G465600LC.1	-20
MA1378.1	PLT3	chr1D	486745812	486745826	-	12.6212	2.12e-05	0.0858	CATTGGGAAACGAGT	0	IP_peak_3556	chr1D	486745740	486746009	270	486745821	19.9	7.50811	14.0941	9.8667	Promoter (1-2kb)	chr1D	486739382	486744309	4928	2	-	TraesCS1D02G441800	TraesCS1D02G441800.1	-1512
MA1378.1	PLT3	chr2A	733859512	733859526	+	12.5909	2.17e-05	0.0873	TCTTGGAATATGTGT	-120	IP_peak_5025	chr2A	733859462	733859808	347	733859646	6.92	5.4791	6.32584	2.93935	Promoter (1-2kb)	chr2A	733853915	733858319	4405	9	-	TraesCS2A02G505600	TraesCS2A02G505600.1	-1327
MA1378.1	PLT3	chr3A	638330951	638330965	-	12.5758	2.19e-05	0.0881	TATTGAAAAACGTGT	85	IP_peak_9410	chr3A	638330788	638331271	484	638330866	6.92	4.74699	5.17727	2.0496	Promoter (1-2kb)	chr3A	638325536	638329362	3827	8	-	TraesCS3A02G390100	TraesCS3A02G390100.1	-1504
MA1378.1	PLT3	chr6D	263461340	263461354	-	12.5303	2.27e-05	0.0903	CCTCGAAAAACGCGG	200	IP_peak_23899	chr6D	263461130	263461383	254	263461140	5.19	5.25471	7.4151	3.8892	Promoter (<=1kb)	chr6D	263455049	263460650	5602	8	-	TraesCS6D02G190800	TraesCS6D02G190800.2	-490
MA1378.1	PLT3	chr7A	712177046	712177060	-	12.5303	2.27e-05	0.0903	CCTTGATATGCGGGA	135	IP_peak_25979	chr7A	712176574	712177146	573	712176911	7.79	7.53345	10.897	6.85299	Promoter (1-2kb)	chr7A	712177946	712181756	3811	2	+	TraesCS7A02G533800	TraesCS7A02G533800.1	-1035
MA1378.1	PLT3	chr3A	475284745	475284759	-	12.4848	2.35e-05	0.0925	CTTTGAAAACCGTGA	17	IP_peak_9051	chr3A	475284581	475284856	276	475284728	7.79	7.53345	10.897	6.85299	Promoter (1-2kb)	chr3A	475281799	475283619	1821	5	-	TraesCS3A02G253900	TraesCS3A02G253900.2	-1109
MA1378.1	PLT3	chr5D	288076644	288076658	+	12.3939	2.52e-05	0.097	TCTTGGAAACTGAGC	0	IP_peak_19914	chr5D	288076525	288076831	307	288076651	19.9	9.88309	17.9007	13.4739	Promoter (1-2kb)	chr5D	288074215	288075426	1212	3	-	TraesCS5D02G256700LC	TraesCS5D02G256700LC.1	-1225
MA1378.1	PLT3	chr2B	178359736	178359750	+	12.303	2.69e-05	0.102	TCTCGTAATTTGTGA	-11	IP_peak_5658	chr2B	178359628	178359887	260	178359761	5.19	5.30804	7.58964	3.97097	Promoter (1-2kb)	chr2B	178357021	178358134	1114	2	-	TraesCS2B02G271900LC	TraesCS2B02G271900LC.1	-1627
MA1378.1	PLT3	chr6D	36551735	36551749	-	12.2879	2.72e-05	0.102	CCTCGGAACGTGTGA	-146	IP_peak_23547	chr6D	36551712	36552215	504	36551895	7.79	7.53345	10.897	6.85299	Promoter (<=1kb)	chr6D	36549729	36551663	1935	3	-	TraesCS6D02G077400LC	TraesCS6D02G077400LC.1	-232
MA1378.1	PLT3	chr7A	42520686	42520700	-	12.2879	2.72e-05	0.102	CCTCGGGAAGCGCTA	174	IP_peak_24538	chr7A	42520426	42520744	319	42520512	6.92	6.25026	7.81133	4.17224	Promoter (<=1kb)	chr7A	42520988	42523284	2297	2	+	TraesCS7A02G077500	TraesCS7A02G077500.1	-476
MA1378.1	PLT3	chr1D	148654046	148654060	-	12.2879	2.72e-05	0.102	CCTCGGGAAGCGCTA	125	IP_peak_2907	chr1D	148653884	148654122	239	148653921	7.79	4.39416	4.98931	1.91819	Promoter (<=1kb)	chr1D	148652934	148653299	366	1	-	TraesCS1D02G183100LC	TraesCS1D02G183100LC.1	-622
MA1378.1	PLT3	chr1B	659723277	659723291	-	12.1667	2.98e-05	0.11	CCTCGAAGAATGTGA	218	IP_peak_2484	chr1B	659722930	659723302	373	659723059	8.65	7.61561	10.8166	6.81219	Promoter (<=1kb)	chr1B	659723346	659725795	2450	2	+	TraesCS1B02G436300	TraesCS1B02G436300.1	-287
MA1378.1	PLT3	chr5B	588498278	588498292	-	12.1061	3.11e-05	0.114	CCTTGGTATCTGTAA	159	IP_peak_19097	chr5B	588497946	588498311	366	588498119	6.92	6.03781	7.35958	3.85322	Promoter (1-2kb)	chr5B	588499719	588503703	3985	8	+	TraesCS5B02G413400	TraesCS5B02G413400.1	-1600
MA1378.1	PLT3	chr4B	485558622	485558636	-	12.0909	3.15e-05	0.115	TTTTGGAATTCGTGA	-90	IP_peak_15103	chr4B	485558444	485558832	389	485558726	11.25	4.08326	5.86499	2.65755	Promoter (1-2kb)	chr4B	485554072	485557160	3089	2	-	TraesCS4B02G403800LC	TraesCS4B02G403800LC.1	-1566
MA1378.1	PLT3	chr4D	389333853	389333867	+	12.0303	3.29e-05	0.119	CATTGGTATATGTGA	202	IP_peak_16133	chr4D	389333570	389333966	397	389333651	3.46	3.82443	4.55152	1.54075	Promoter (1-2kb)	chr4D	389335000	389335233	234	1	+	TraesCS4D02G324200LC	TraesCS4D02G324200LC.1	-1349
MA1378.1	PLT3	chr1A	560182498	560182512	+	12.0303	3.29e-05	0.119	TATTGAAATTTGTGA	-91	IP_peak_1152	chr1A	560182122	560182691	570	560182603	12.12	4.37172	6.6833	3.25404	Promoter (<=1kb)	chr1A	560177974	560181992	4019	6	-	TraesCS1A02G393700	TraesCS1A02G393700.1	-611
MA1378.1	PLT3	chr4A	628948476	628948490	+	12.0303	3.29e-05	0.119	TATTGAAATTTGTGA	0	IP_peak_14005	chr4A	628948347	628948571	225	628948478	9.52	6.65831	9.15511	5.3363	Promoter (<=1kb)	chr4A	628949455	628949778	324	1	+	TraesCS4A02G521500LC	TraesCS4A02G521500LC.1	-977
MA1378.1	PLT3	chr2A	21259686	21259700	-	12	3.36e-05	0.121	CATGGAAAAACGTGT	0	IP_peak_3694	chr2A	21259228	21259816	589	21259690	19.04	14.7684	27.4846	22.5999	Promoter (1-2kb)	chr2A	21261065	21266250	5186	11	+	TraesCS2A02G053200	TraesCS2A02G053200.1	-1375
MA1378.1	PLT3	chr2A	632515193	632515207	-	12	3.36e-05	0.121	TTTCGGAATTTGTGA	50	IP_peak_4760	chr2A	632515023	632515308	286	632515143	11.25	8.47132	13.0666	8.8809	Promoter (1-2kb)	chr2A	632512988	632513779	792	1	-	TraesCS2A02G542600LC	TraesCS2A02G542600LC.1	-1364
MA1378.1	PLT3	chr4D	260716421	260716435	-	11.9848	3.4e-05	0.122	TCTTGATATGTGTGA	159	IP_peak_15959	chr4D	260715994	260716468	475	260716262	4.33	4.56623	6.03134	2.69714	Promoter (<=1kb)	chr4D	260716853	260742053	25201	7	+	TraesCS4D02G163900	TraesCS4D02G163900.1	-591
MA1378.1	PLT3	chr5B	359469439	359469453	+	11.9697	3.43e-05	0.123	CATCGGAGATCGAGA	136	IP_peak_18628	chr5B	359469176	359469470	295	359469303	6.92	6.47821	8.34871	4.64755	Promoter (1-2kb)	chr5B	359471049	359476858	5810	7	+	TraesCS5B02G199500	TraesCS5B02G199500.1	-1746
MA1378.1	PLT3	chr7B	699435331	699435345	-	11.9091	3.58e-05	0.127	GCTCGGGAGTCGTGA	18	IP_peak_27400	chr7B	699435188	699435477	290	699435313	8.65	8.27526	12.6304	8.46143	Promoter (<=1kb)	chr7B	699436157	699437438	1282	2	+	TraesCS7B02G732500LC	TraesCS7B02G732500LC.1	-844
MA1378.1	PLT3	chr5B	330853324	330853338	+	11.8636	3.7e-05	0.128	TATAGGGATGCGTGT	0	IP_peak_18571	chr5B	330853196	330853471	276	330853330	10.38	9.75887	16.2298	11.8542	Promoter (<=1kb)	chr5B	330845985	330852704	6720	10	-	TraesCS5B02G181300	TraesCS5B02G181300.1	-626
MA1378.1	PLT3	chr5D	422755950	422755964	+	11.803	3.86e-05	0.132	TATTGAAAATCGAGA	139	IP_peak_20243	chr5D	422755591	422756024	434	422755811	13.85	12.7261	21.9055	17.2306	Promoter (<=1kb)	chr5D	422756696	422761113	4418	12	+	TraesCS5D02G331700	TraesCS5D02G331700.1	-885
MA1378.1	PLT3	chr1D	92964485	92964499	+	11.7879	3.9e-05	0.133	TCTTGGGACTCGAGC	0	IP_peak_2810	chr1D	92964351	92964591	241	92964496	18.17	10.6347	19.2279	14.7192	Promoter (<=1kb)	chr1D	92959197	92963507	4311	4	-	TraesCS1D02G103200	TraesCS1D02G103200.1	-989
MA1378.1	PLT3	chr4A	6894730	6894744	+	11.7727	3.94e-05	0.133	TTTTGAAATTCGTGA	0	IP_peak_12746	chr4A	6894627	6894960	334	6894739	9.52	5.25952	6.95302	3.47631	Promoter (1-2kb)	chr4A	6889789	6893137	3349	5	-	TraesCS4A02G012000	TraesCS4A02G012000.1	-1602
MA1378.1	PLT3	chr2D	73011850	73011864	-	11.7727	3.94e-05	0.133	TTTTGAAATTCGTGA	-10	IP_peak_7120	chr2D	73011783	73012701	919	73011874	12.12	5.60935	8.68779	4.96	Promoter (1-2kb)	chr2D	73008820	73010085	1266	2	-	TraesCS2D02G124800	TraesCS2D02G124800.1	-1789
MA1378.1	PLT3	chr1B	134577933	134577947	+	11.7727	3.94e-05	0.133	TTTTGAAATTCGTGA	-7	IP_peak_1578	chr1B	134577800	134578096	297	134577954	13.85	7.42295	11.3449	7.27452	Promoter (<=1kb)	chr1B	134577351	134577716	366	1	-	TraesCS1B02G193300LC	TraesCS1B02G193300LC.1	-238
MA1378.1	PLT3	chr5B	393995124	393995138	+	11.7727	3.94e-05	0.133	TTTTGGGATTTGTGC	0	IP_peak_18695	chr5B	393994952	393995252	301	393995124	9.52	9.01706	14.4095	10.138	Promoter (1-2kb)	chr5B	393996696	393997480	785	2	+	TraesCS5B02G358500LC	TraesCS5B02G358500LC.1	-1572
MA1378.1	PLT3	chr7B	538227939	538227953	-	11.7727	3.94e-05	0.133	TTTTGAAATTCGTGA	-29	IP_peak_27046	chr7B	538227472	538228093	622	538227982	12.12	4.37172	6.6833	3.25404	Promoter (1-2kb)	chr7B	538222652	538226798	4147	14	-	TraesCS7B02G301400	TraesCS7B02G301400.1	-1184
MA1378.1	PLT3	chr4A	632997552	632997566	-	11.7576	3.98e-05	0.134	TATTGAAAAACGTAC	78	IP_peak_14016	chr4A	632997393	632997752	360	632997474	12.12	6.55758	10.1966	6.23501	Promoter (<=1kb)	chr4A	632998265	632999875	1611	1	+	TraesCS4A02G528800LC	TraesCS4A02G528800LC.1	-791
MA1378.1	PLT3	chr7B	452467050	452467064	-	11.7273	4.07e-05	0.137	TCTCGGAAAACGCGG	-107	IP_peak_26858	chr7B	452466996	452467342	347	452467171	7.79	6.47712	8.32336	4.64676	Promoter (1-2kb)	chr7B	452468173	452468507	335	2	+	TraesCS7B02G244000	TraesCS7B02G244000.1	-1002
MA1378.1	PLT3	chr2D	47217041	47217055	-	11.6818	4.2e-05	0.14	TTTCGAAATTTGTGA	49	IP_peak_7051	chr2D	47216856	47217622	767	47216992	8.65	6.02549	7.77718	4.15014	Promoter (<=1kb)	chr2D	47214535	47216416	1882	2	-	TraesCS2D02G095200	TraesCS2D02G095200.1	-576
MA1378.1	PLT3	chr2D	307023849	307023863	+	11.6818	4.2e-05	0.14	TTTCGAAATTTGTGA	-36	IP_peak_7521	chr2D	307023789	307024020	232	307023899	7.79	7.45776	10.6629	6.6728	Promoter (1-2kb)	chr2D	307020919	307022712	1794	6	-	TraesCS2D02G254800	TraesCS2D02G254800.1	-1187
MA1378.1	PLT3	chr1A	32477115	32477129	-	11.6364	4.34e-05	0.143	TTTTGAAAATCGTGA	45	IP_peak_109	chr1A	32476640	32477147	508	32477070	6.92	6.79165	9.21445	5.3363	Promoter (<=1kb)	chr1A	32472235	32476408	4174	4	-	TraesCS1A02G051000	TraesCS1A02G051000.1	-662
MA1378.1	PLT3	chrUn	47855027	47855041	+	11.6364	4.34e-05	0.143	TTTTGAAAATCGTGA	-22	IP_peak_29092	chrUn	47854991	47855424	434	47855063	9.52	4.7721	6.22567	2.87588	Promoter (1-2kb)	chrUn	47856627	47857380	754	1	+	TraesCSU02G061300	TraesCSU02G061300.1	-1564
MA1378.1	PLT3	chr5B	394759680	394759694	+	11.6364	4.34e-05	0.143	TTTTGAAAATCGTGA	60	IP_peak_18698	chr5B	394759424	394759779	356	394759620	6.06	5.56759	7.81133	4.17224	Promoter (<=1kb)	chr5B	394754189	394758795	4607	3	-	TraesCS5B02G220500	TraesCS5B02G220500.1	-825
MA1378.1	PLT3	chr5B	21609878	21609892	+	11.5606	4.57e-05	0.149	TCTCGAATGACGTGA	34	IP_peak_18046	chr5B	21609499	21609931	433	21609844	13.85	6.34958	9.71042	5.80193	Promoter (<=1kb)	chr5B	21610103	21614578	4476	19	+	TraesCS5B02G031000LC	TraesCS5B02G031000LC.1	-259
MA1378.1	PLT3	chr6A	158924098	158924112	+	11.5303	4.67e-05	0.151	TATAGGAATGCGTGA	-226	IP_peak_21091	chr6A	158924050	158924431	382	158924338	9.52	3.50635	4.33257	1.47231	Promoter (1-2kb)	chr6A	158920199	158922488	2290	4	-	TraesCS6A02G163500	TraesCS6A02G163500.1	-1850
MA1378.1	PLT3	chr3D	373845755	373845769	-	11.5	4.77e-05	0.153	TTTCGAAATTTGTGT	56	IP_peak_12099	chr3D	373845531	373845828	298	373845699	12.12	5.1209	7.90674	4.26402	Promoter (1-2kb)	chr3D	373842786	373844025	1240	1	-	TraesCS3D02G269200	TraesCS3D02G269200.1	-1674
MA1378.1	PLT3	chr6D	346979353	346979367	+	11.4848	4.82e-05	0.154	TCTCGAAAAATGTTC	57	IP_peak_24038	chr6D	346979200	346979582	383	346979296	10.38	3.79481	5.08049	1.98909	Promoter (1-2kb)	chr6D	346975891	346978096	2206	4	-	TraesCS6D02G245100	TraesCS6D02G245100.1	-1200
MA1378.1	PLT3	chr1B	119764449	119764463	+	11.4394	4.97e-05	0.157	TCTCGGGATTCGAAG	-26	IP_peak_1556	chr1B	119764402	119764659	258	119764489	4.33	3.80101	4.20572	1.35901	Promoter (<=1kb)	chr1B	119765155	119768521	3367	9	+	TraesCS1B02G107600	TraesCS1B02G107600.1	-666
MA1378.1	PLT3	chr1B	50899038	50899052	-	11.4242	5.02e-05	0.159	CATGGAGACTCGTGC	-72	IP_peak_1406	chr1B	50899037	50899353	317	50899124	3.46	3.82443	4.55152	1.54075	Promoter (1-2kb)	chr1B	50900564	50902481	1918	1	+	TraesCS1B02G066500	TraesCS1B02G066500.1	-1440
MA1378.1	PLT3	chr2B	212584811	212584825	+	11.4091	5.07e-05	0.16	TCTAGGGATATGTGT	0	IP_peak_5738	chr2B	212584777	212585000	224	212584812	12.12	4.37172	6.6833	3.25404	Promoter (1-2kb)	chr2B	212576888	212583372	6485	4	-	TraesCS2B02G222800	TraesCS2B02G222800.1	-1440
MA1378.1	PLT3	chr6D	265880194	265880208	+	11.4091	5.07e-05	0.16	TCTAGGGATATGTGT	-111	IP_peak_23902	chr6D	265880115	265880367	253	265880319	6.06	5.98906	9.01018	5.25107	Promoter (<=1kb)	chr6D	265880824	265881720	897	1	+	TraesCS6D02G192200	TraesCS6D02G192200.1	-505
MA1378.1	PLT3	chr2B	454324478	454324492	+	11.4091	5.07e-05	0.16	TCTAGGGATATGTGT	26	IP_peak_6136	chr2B	454324302	454324610	309	454324452	7.79	6.47712	8.32336	4.64676	Promoter (<=1kb)	chr2B	454325050	454328671	3622	8	+	TraesCS2B02G318400	TraesCS2B02G318400.1	-598
MA1378.1	PLT3	chr6D	437675904	437675918	-	11.3788	5.18e-05	0.163	CATCGGGTCGCGTGA	0	IP_peak_24241	chr6D	437675790	437676595	806	437675917	10.38	9.75887	16.2298	11.8542	Promoter (1-2kb)	chr6D	437674377	437674568	192	1	-	TraesCS6D02G444500LC	TraesCS6D02G444500LC.1	-1349
MA1378.1	PLT3	chr2A	52123795	52123809	+	11.3636	5.23e-05	0.163	TTTTGAAAACCGTGA	-2	IP_peak_3787	chr2A	52123689	52124222	534	52123811	12.12	7.27466	11.3571	7.28604	Promoter (1-2kb)	chr2A	52119750	52122434	2685	6	-	TraesCS2A02G099100	TraesCS2A02G099100.1	-1377
MA1378.1	PLT3	chr5D	506331241	506331255	-	11.3485	5.28e-05	0.164	CCTCGATTTTCGGAA	21	IP_peak_20494	chr5D	506331046	506331273	228	506331220	10.38	5.69221	7.99793	4.33317	Promoter (1-2kb)	chr5D	506332357	506332845	489	1	+	TraesCS5D02G559400LC	TraesCS5D02G559400LC.1	-1137
MA1378.1	PLT3	chr2D	405172670	405172684	+	11.3333	5.34e-05	0.165	TATTGGTATGCGGGC	28	IP_peak_7682	chr2D	405172437	405172707	271	405172642	7.79	5.41005	6.48178	3.07661	Promoter (<=1kb)	chr2D	405172914	405173630	717	1	+	TraesCS2D02G409600LC	TraesCS2D02G409600LC.1	-272
MA1378.1	PLT3	chr6B	695966537	695966551	-	11.3333	5.34e-05	0.165	TCTTGGTATTTGAGA	-5	IP_peak_23327	chr6B	695966218	695966635	418	695966556	5.19	4.28221	5.12651	2.0135	Promoter (<=1kb)	chr6B	695967109	695967321	213	1	+	TraesCS6B02G762800LC	TraesCS6B02G762800LC.1	-553
MA1378.1	PLT3	chr2D	529690013	529690027	-	11.2879	5.5e-05	0.169	TCTAGGGAAGTGTGT	146	IP_peak_7934	chr2D	529689744	529690193	450	529689867	5.19	5.30804	7.58964	3.97097	Promoter (<=1kb)	chr2D	529690769	529692244	1476	2	+	TraesCS2D02G522400LC	TraesCS2D02G522400LC.1	-902
MA1378.1	PLT3	chr2B	748712177	748712191	-	11.2727	5.56e-05	0.171	CTTCGAAACTCGTGA	6	IP_peak_6725	chr2B	748712065	748712313	249	748712171	10.38	5.69221	7.99793	4.33317	Promoter (<=1kb)	chr2B	748708519	748711640	3122	7	-	TraesCS2B02G553000	TraesCS2B02G553000.1	-531
MA1378.1	PLT3	chr3D	6150575	6150589	+	11.2121	5.8e-05	0.176	CATTGGAATCTGTAA	11	IP_peak_11440	chr3D	6150341	6150671	331	6150564	8.65	6.67599	8.88947	5.14526	Promoter (<=1kb)	chr3D	6146779	6149852	3074	2	-	TraesCS3D02G018200	TraesCS3D02G018200.1	-712
MA1378.1	PLT3	chr6B	602821171	602821185	+	11.2121	5.8e-05	0.176	TCTCGGGAATCCCGC	0	IP_peak_23110	chr6B	602821028	602821323	296	602821184	16.44	13.292	23.2732	18.5639	Promoter (<=1kb)	chr6B	602821503	602825835	4333	2	+	TraesCS6B02G342200	TraesCS6B02G342200.1	-319
MA1378.1	PLT3	chr2A	755111939	755111953	-	11.197	5.86e-05	0.178	TATGGGGATATGTGC	-80	IP_peak_5099	chr2A	755111731	755112191	461	755112033	9.52	5.25952	6.95302	3.47631	Promoter (<=1kb)	chr2A	755112720	755113307	588	1	+	TraesCS2A02G705100LC	TraesCS2A02G705100LC.1	-687
MA1378.1	PLT3	chr7A	663825192	663825206	-	11.1515	6.04e-05	0.182	TCTCGGAATTTTTGA	-31	IP_peak_25830	chr7A	663824972	663825257	286	663825237	8.65	4.82684	5.94877	2.69714	Promoter (1-2kb)	chr7A	663826331	663826489	159	1	+	TraesCS7A02G662300LC	TraesCS7A02G662300LC.1	-1094
MA1378.1	PLT3	chr5A	646201634	646201648	+	11.1212	6.17e-05	0.185	TGTCGGGAAGTGTGC	-40	IP_peak_17803	chr5A	646201586	646201866	281	646201688	7.79	6.58536	8.53902	4.82648	Promoter (<=1kb)	chr5A	646199424	646201315	1892	2	-	TraesCS5A02G469000	TraesCS5A02G469000.1	-373
MA1378.1	PLT3	chr6B	689993334	689993348	-	11.0758	6.36e-05	0.188	CATTGAAATTCGAAA	-27	IP_peak_23303	chr6B	689993200	689993482	283	689993375	12.98	5.97947	8.68779	4.96	Promoter (<=1kb)	chr6B	689994322	689994645	324	1	+	TraesCS6B02G751200LC	TraesCS6B02G751200LC.1	-947
MA1378.1	PLT3	chr4D	454347909	454347923	+	11.0152	6.62e-05	0.193	CCTCGAAAAGTGCAT	-161	IP_peak_16279	chr4D	454347828	454348380	553	454348084	6.06	6.04984	9.21445	5.3363	Promoter (1-2kb)	chr4D	454349261	454349667	407	2	+	TraesCS4D02G385900LC	TraesCS4D02G385900LC.1	-1177
MA1378.1	PLT3	chr2A	52126245	52126259	+	11	6.69e-05	0.194	TTTTGGAAAACGTGA	135	IP_peak_3788	chr2A	52125928	52126362	435	52126110	12.98	7.38905	10.7981	6.79844	Promoter (<=1kb)	chr2A	52126850	52131904	5055	5	+	TraesCS2A02G099200	TraesCS2A02G099200.1	-740
MA1378.1	PLT3	chr3B	542679081	542679095	+	11	6.69e-05	0.194	TTTTGGAAAACGTGA	9	IP_peak_10761	chr3B	542678942	542679184	243	542679072	12.12	6.55758	10.1966	6.23501	Promoter (1-2kb)	chr3B	542676742	542677402	661	1	-	TraesCS3B02G336400	TraesCS3B02G336400.1	-1670
MA1378.1	PLT3	chr3D	17408803	17408817	+	10.9545	6.89e-05	0.198	CCTTGAAAAACTTGA	-12	IP_peak_11496	chr3D	17408631	17408968	338	17408829	12.98	7.05636	10.2958	6.31634	Promoter (1-2kb)	chr3D	17406976	17407431	456	1	-	TraesCS3D02G045600	TraesCS3D02G045600.1	-1398
MA1378.1	PLT3	chr7A	35750197	35750211	+	10.9394	6.96e-05	0.199	TATTGAAAAATGTGA	62	IP_peak_24512	chr7A	35750046	35750317	272	35750135	9.52	5.25952	6.95302	3.47631	Promoter (<=1kb)	chr7A	35750572	35750757	186	1	+	TraesCS7A02G087800LC	TraesCS7A02G087800LC.1	-437
MA1378.1	PLT3	chr3A	703129634	703129648	-	10.9394	6.96e-05	0.199	TCTAGGAAAATGTGA	195	IP_peak_9619	chr3A	703129295	703129677	383	703129439	6.92	6.25026	7.81133	4.17224	Promoter (<=1kb)	chr3A	703128388	703128614	227	2	-	TraesCS3A02G629300LC	TraesCS3A02G629300LC.1	-825
MA1378.1	PLT3	chr5B	648301543	648301557	+	10.8939	7.17e-05	0.203	CTTTGAAATTTGTGT	88	IP_peak_19226	chr5B	648301280	648301732	453	648301455	12.12	4.37172	6.6833	3.25404	Promoter (1-2kb)	chr5B	648303193	648303829	637	2	+	TraesCS5B02G686000LC	TraesCS5B02G686000LC.1	-1738
MA1378.1	PLT3	chr2B	672826180	672826194	-	10.8939	7.17e-05	0.203	CCTCGAATTTAGTAA	0	IP_peak_6560	chr2B	672826071	672826312	242	672826188	8.65	8.19211	12.3666	8.24803	Promoter (<=1kb)	chr2B	672825389	672825745	357	1	-	TraesCS2B02G475900	TraesCS2B02G475900.1	-443
MA1378.1	PLT3	chr1D	276536170	276536184	+	10.8788	7.24e-05	0.204	TTTCGATAATTGTGT	-77	IP_peak_3060	chr1D	276536095	276536415	321	276536261	10.38	5.38251	7.52307	3.97097	Promoter (<=1kb)	chr1D	276531205	276535281	4077	7	-	TraesCS1D02G196700	TraesCS1D02G196700.1	-980
MA1378.1	PLT3	chr7B	744933829	744933843	-	10.8788	7.24e-05	0.204	CATTGAGAAAAGTGT	185	IP_peak_27559	chr7B	744933480	744933849	370	744933644	5.19	5.30804	7.58964	3.97097	Promoter (<=1kb)	chr7B	744912231	744932779	20549	26	-	TraesCS7B02G493400	TraesCS7B02G493400.1	-865
MA1378.1	PLT3	chr2A	679916131	679916145	-	10.8636	7.31e-05	0.205	TCTTGAAATTCATGA	6	IP_peak_4878	chr2A	679915998	679916281	284	679916125	15.58	5.51243	9.29694	5.40909	Promoter (1-2kb)	chr2A	679917419	679919087	1669	3	+	TraesCS2A02G584900LC	TraesCS2A02G584900LC.1	-1294
MA1378.1	PLT3	chr7D	28759547	28759561	-	10.8333	7.46e-05	0.208	TTTTGAAATGCGTGA	-139	IP_peak_27680	chr7D	28759408	28759761	354	28759700	9.52	3.50635	4.33257	1.47231	Promoter (1-2kb)	chr7D	28757502	28758533	1032	1	-	TraesCS7D02G067400LC	TraesCS7D02G067400LC.1	-1167
MA1378.1	PLT3	chr2A	103356689	103356703	-	10.8333	7.46e-05	0.208	TTTTGAAATGCGTGA	-125	IP_peak_3900	chr2A	103356678	103356975	298	103356828	18.17	6.37575	12.1622	8.05577	Promoter (1-2kb)	chr2A	103354531	103355459	929	1	-	TraesCS2A02G156800	TraesCS2A02G156800.2	-1369
MA1378.1	PLT3	chr6D	379046736	379046750	+	10.8333	7.46e-05	0.208	GCTTGAAAAACGTGA	35	IP_peak_24089	chr6D	379046354	379047572	1219	379046701	16.44	8.721	14.9606	10.6567	Promoter (1-2kb)	chr6D	379048509	379051039	2531	2	+	TraesCS6D02G268700	TraesCS6D02G268700.1	-1808
MA1378.1	PLT3	chr6D	427614992	427615006	-	10.8333	7.46e-05	0.208	TTTTGAAATGCGTGA	-7	IP_peak_24202	chr6D	427614853	427615174	322	427615013	10.38	7.87288	11.6355	7.5455	Promoter (1-2kb)	chr6D	427616796	427617170	375	1	+	TraesCS6D02G424000LC	TraesCS6D02G424000LC.1	-1783
MA1378.1	PLT3	chr1A	469834570	469834584	-	10.8333	7.46e-05	0.208	TTTTGAAATGCGTGA	-85	IP_peak_893	chr1A	469834495	469834774	280	469834669	14.71	3.14225	4.70046	1.67409	Promoter (1-2kb)	chr1A	469830282	469832781	2500	3	-	TraesCS1A02G415600LC	TraesCS1A02G415600LC.1	-1888
MA1378.1	PLT3	chr4B	583334222	583334236	-	10.8333	7.46e-05	0.208	TTTTGAAATGCGTGA	86	IP_peak_15309	chr4B	583333957	583334293	337	583334136	15.58	5.95399	10.0249	6.09418	Promoter (1-2kb)	chr4B	583335291	583338019	2729	2	+	TraesCS4B02G298000	TraesCS4B02G298000.1	-1155
MA1378.1	PLT3	chr6B	602549496	602549510	-	10.8333	7.46e-05	0.208	TTTTGAAATGCGTGA	46	IP_peak_23107	chr6B	602549043	602549742	700	602549450	12.98	7.38905	10.7981	6.79844	Promoter (1-2kb)	chr6B	602551129	602553195	2067	4	+	TraesCS6B02G620700LC	TraesCS6B02G620700LC.1	-1679
MA1378.1	PLT3	chr4B	657242690	657242704	-	10.8333	7.46e-05	0.208	TTTTGAAATGCGTGA	-69	IP_peak_15505	chr4B	657242471	657242830	360	657242773	13.85	3.71147	5.46828	2.29879	Promoter (<=1kb)	chr4B	657243113	657246017	2905	1	+	TraesCS4B02G372100	TraesCS4B02G372100.1	-340
MA1378.1	PLT3	chr5B	689952091	689952105	-	10.8333	7.46e-05	0.208	TCTCGAGAAATGTTT	-144	IP_peak_19322	chr5B	689951966	689952291	326	689952249	4.33	4.52036	5.88649	2.66637	Promoter (1-2kb)	chr5B	689944087	689951241	7155	12	-	TraesCS5B02G532600	TraesCS5B02G532600.2	-1008
MA1378.1	PLT3	chr7D	131607588	131607602	+	10.8182	7.53e-05	0.209	TATTGGAACTCGTGA	-37	IP_peak_27937	chr7D	131607452	131607909	458	131607639	10.38	5.69221	7.99793	4.33317	Promoter (1-2kb)	chr7D	131598978	131606296	7319	14	-	TraesCS7D02G178400	TraesCS7D02G178400.1	-1343
MA1378.1	PLT3	chr5A	330725300	330725314	+	10.8182	7.53e-05	0.209	TTTTGAAATACGTGA	69	IP_peak_17073	chr5A	330725103	330725336	234	330725231	12.98	4.64912	6.66605	3.24411	Promoter (<=1kb)	chr5A	330725672	330728810	3139	9	+	TraesCS5A02G153300	TraesCS5A02G153300.1	-441
MA1378.1	PLT3	chr7D	451039618	451039632	+	10.8182	7.53e-05	0.209	TTTTGGAAAACGTGT	4	IP_peak_28452	chr7D	451039497	451039811	315	451039614	24.23	9.85134	21.006	16.3837	Promoter (1-2kb)	chr7D	451036905	451038113	1209	1	-	TraesCS7D02G474300LC	TraesCS7D02G474300LC.1	-1501
MA1378.1	PLT3	chr7B	495712623	495712637	-	10.8182	7.53e-05	0.209	CTTTGGGAAATGTGA	-4	IP_peak_26956	chr7B	495712439	495712813	375	495712641	12.98	6.99026	10.1966	6.23501	Promoter (1-2kb)	chr7B	495714099	495714739	641	4	+	TraesCS7B02G465700LC	TraesCS7B02G465700LC.1	-1458
MA1378.1	PLT3	chr6D	464534653	464534667	+	10.803	7.61e-05	0.21	CCTTGAAAAGCGATC	3	IP_peak_24340	chr6D	464534621	464535032	412	464534650	6.06	4.88066	6.32584	2.93935	Promoter (1-2kb)	chr6D	464532331	464532862	532	2	-	TraesCS6D02G387800	TraesCS6D02G387800.1	-1788
MA1378.1	PLT3	chr2D	17651088	17651102	-	10.7879	7.68e-05	0.212	CCTCGAAAAATGGAA	0	IP_peak_6947	chr2D	17651023	17651260	238	17651093	8.65	4.82684	5.94877	2.69714	Promoter (1-2kb)	chr2D	17653054	17654229	1176	1	+	TraesCS2D02G038900LC	TraesCS2D02G038900LC.1	-1961
MA1378.1	PLT3	chr4B	450687225	450687239	-	10.7727	7.75e-05	0.213	TCTAGAAATGTGTGA	133	IP_peak_15045	chr4B	450686984	450687494	511	450687092	5.19	5.25471	7.4151	3.8892	Promoter (<=1kb)	chr4B	450685618	450686570	953	1	-	TraesCS4B02G212300	TraesCS4B02G212300.1	-522
MA1378.1	PLT3	chr5D	544797433	544797447	-	10.7727	7.75e-05	0.213	TCTCGAAATTTATGA	116	IP_peak_20602	chr5D	544797167	544797449	283	544797317	9.52	7.27444	10.2419	6.26689	Promoter (1-2kb)	chr5D	544799018	544800238	1221	2	+	TraesCS5D02G527700	TraesCS5D02G527700.1	-1701
MA1378.1	PLT3	chr3B	379346462	379346476	+	10.7121	8.06e-05	0.218	TCTCGGTTTTTGGGA	-64	IP_peak_10505	chr3B	379346364	379346612	249	379346540	7.79	6.69728	8.77014	5.03769	Promoter (<=1kb)	chr3B	379347008	379358817	11810	19	+	TraesCS3B02G240600	TraesCS3B02G240600.1	-468
MA1378.1	PLT3	chr6D	447845854	447845868	-	10.7121	8.06e-05	0.218	CATTGAAATCTGTAT	-6	IP_peak_24272	chr6D	447845638	447845889	252	447845874	5.19	4.28221	5.12651	2.0135	Promoter (<=1kb)	chr6D	447846680	447850057	3378	4	+	TraesCS6D02G350200	TraesCS6D02G350200.1	-806
MA1378.1	PLT3	chr7A	18796699	18796713	+	10.697	8.15e-05	0.219	CCTCGGAAAATGTCA	40	IP_peak_24436	chr7A	18796638	18796928	291	18796659	9.52	4.49899	5.82037	2.62029	Promoter (1-2kb)	chr7A	18792217	18795483	3267	12	-	TraesCS7A02G040500	TraesCS7A02G040500.1	-1176
MA1378.1	PLT3	chr7A	63306201	63306215	-	10.697	8.15e-05	0.219	CATTGAAATGAGTGA	76	IP_peak_24602	chr7A	63305549	63306237	689	63306125	9.52	7.27444	10.2419	6.26689	Promoter (1-2kb)	chr7A	63307614	63308288	675	1	+	TraesCS7A02G103100	TraesCS7A02G103100.1	-1489
MA1378.1	PLT3	chr2B	44402585	44402599	-	10.6818	8.23e-05	0.22	TGTCGGGATGCGGGC	5	IP_peak_5378	chr2B	44402355	44402628	274	44402580	9.52	5.25952	6.95302	3.47631	Promoter (<=1kb)	chr2B	44402874	44404731	1858	5	+	TraesCS2B02G079600	TraesCS2B02G079600.1	-294
MA1378.1	PLT3	chr3D	58095290	58095304	-	10.6818	8.23e-05	0.22	TTTTGAAAAACGTGA	-89	IP_peak_11622	chr3D	58095286	58095528	243	58095393	12.98	5.45879	7.90674	4.26402	Promoter (<=1kb)	chr3D	58091238	58094781	3544	3	-	TraesCS3D02G105700	TraesCS3D02G105700.2	-612
MA1378.1	PLT3	chr4D	418862613	418862627	-	10.6818	8.23e-05	0.22	TTTTGAAAAACGTGA	86	IP_peak_16204	chr4D	418862447	418862672	226	418862527	13.85	3.71147	5.46828	2.29879	Promoter (<=1kb)	chr4D	418859635	418861713	2079	2	-	TraesCS4D02G349800LC	TraesCS4D02G349800LC.1	-814
MA1378.1	PLT3	chr5B	663799894	663799908	-	10.6818	8.23e-05	0.22	TTTTGAAAAACGTGA	84	IP_peak_19254	chr5B	663799625	663799935	311	663799810	9.52	6.65831	9.15511	5.3363	Promoter (<=1kb)	chr5B	663800612	663801655	1044	3	+	TraesCS5B02G496700	TraesCS5B02G496700.1	-802
MA1378.1	PLT3	chr5D	314846060	314846074	-	10.6667	8.31e-05	0.222	TCTGGAGATTCATGC	163	IP_peak_19961	chr5D	314845817	314846208	392	314845897	6.06	5.98906	9.01018	5.25107	Promoter (<=1kb)	chr5D	314846472	314851544	5073	7	+	TraesCS5D02G208400	TraesCS5D02G208400.1	-575
MA1378.1	PLT3	chr5A	671390300	671390314	-	10.6667	8.31e-05	0.222	TCTGGAAATACGAGA	-52	IP_peak_17873	chr5A	671390167	671390427	261	671390366	6.92	4.74699	5.17727	2.0496	Promoter (<=1kb)	chr5A	671390845	671393558	2714	3	+	TraesCS5A02G506500	TraesCS5A02G506500.1	-479
MA1378.1	PLT3	chr5B	488716883	488716897	+	10.6515	8.39e-05	0.224	TCTCGGAAAGTGTTT	-149	IP_peak_18912	chr5B	488716807	488717069	263	488717046	8.65	4.56423	5.56755	2.38831	Promoter (<=1kb)	chr5B	488717774	488720578	2805	2	+	TraesCS5B02G304600	TraesCS5B02G304600.1	-728
MA1378.1	PLT3	chr2A	145203529	145203543	-	10.6364	8.47e-05	0.225	TATGGGGATGCGGGC	-45	IP_peak_3976	chr2A	145203470	145203754	285	145203588	12.98	5.45879	7.90674	4.26402	Promoter (1-2kb)	chr2A	145196031	145201588	5558	12	-	TraesCS2A02G184900	TraesCS2A02G184900.1	-2000
MA1378.1	PLT3	chr2D	43900525	43900539	+	10.5909	8.72e-05	0.23	CCTCGAAGATAGCGC	-2	IP_peak_7040	chr2D	43900360	43900712	353	43900541	9.52	8.60092	13.1644	8.96993	Promoter (<=1kb)	chr2D	43901179	43901532	354	1	+	TraesCS2D02G098200LC	TraesCS2D02G098200LC.1	-638
MA1378.1	PLT3	chrUn	68088194	68088208	+	10.5303	9.07e-05	0.237	TATTGTTATTCGTGA	75	IP_peak_29139	chrUn	68088067	68088307	241	68088119	5.19	3.71003	4.15211	1.3098	Promoter (1-2kb)	chrUn	68085854	68086177	324	1	-	TraesCSU02G122700LC	TraesCSU02G122700LC.1	-1942
MA1378.1	PLT3	chr2B	753986106	753986120	-	10.5152	9.16e-05	0.237	CCTAGAAGTACGTGT	0	IP_peak_6741	chr2B	753985777	753986167	391	753986115	8.65	5.78396	7.39136	3.87996	Promoter (<=1kb)	chr2B	753986874	753987422	549	1	+	TraesCS2B02G561100	TraesCS2B02G561100.1	-759
MA1378.1	PLT3	chr6D	384433865	384433879	-	10.5	9.25e-05	0.238	TTTTGAAAAACGTGT	-89	IP_peak_24096	chr6D	384433746	384434111	366	384433968	12.12	3.27879	4.79185	1.75235	Promoter (<=1kb)	chr6D	384431501	384433015	1515	2	-	TraesCS6D02G275800	TraesCS6D02G275800.1	-953
MA1378.1	PLT3	chr5A	450544416	450544430	+	10.5	9.25e-05	0.238	TCTTGAAATTTGAAC	17	IP_peak_17301	chr5A	450544349	450544650	302	450544399	11.25	5.23923	7.69686	4.07175	Promoter (1-2kb)	chr5A	450545761	450546102	342	1	+	TraesCS5A02G359200LC	TraesCS5A02G359200LC.1	-1362
MA1378.1	PLT3	chr2A	615357387	615357401	+	10.5	9.25e-05	0.238	CATGGGAGAGCGTGC	2	IP_peak_4719	chr2A	615357240	615357475	236	615357385	15.58	8.28831	13.7287	9.50863	Promoter (<=1kb)	chr2A	615356092	615356532	441	2	-	TraesCS2A02G527900LC	TraesCS2A02G527900LC.1	-853
MA1378.1	PLT3	chr6A	490299708	490299722	-	10.4394	9.6e-05	0.244	TATTGGAATTTGAGA	-76	IP_peak_21749	chr6A	490299652	490299931	280	490299798	6.06	5.98906	9.01018	5.25107	Promoter (1-2kb)	chr6A	490301789	490302873	1085	3	+	TraesCS6A02G265300	TraesCS6A02G265300.1	-1991
MA1378.1	PLT3	chr6B	157665238	157665252	-	10.4242	9.69e-05	0.246	TCTCGATTTATGGGC	-78	IP_peak_22433	chr6B	157665195	157665445	251	157665330	9.52	7.27444	10.2419	6.26689	Promoter (<=1kb)	chr6B	157662097	157664909	2813	3	-	TraesCS6B02G154000	TraesCS6B02G154000.1	-421
MA1378.1	PLT3	chr1A	339517260	339517274	-	10.4091	9.79e-05	0.248	TATTGAAAAAAGTGC	-72	IP_peak_641	chr1A	339517116	339517517	402	339517346	12.98	6.60994	9.62777	5.72452	Promoter (1-2kb)	chr1A	339515613	339515906	294	1	-	TraesCS1A02G314300LC	TraesCS1A02G314300LC.1	-1440
MA1378.1	PLT3	chr6A	100767593	100767607	+	10.3939	9.88e-05	0.25	CCTTGAAGTATGTGT	0	IP_peak_20968	chr6A	100767480	100767705	226	100767604	4.33	4.52036	5.88649	2.66637	Promoter (1-2kb)	chr6A	100766198	100766446	249	1	-	TraesCS6A02G128900	TraesCS6A02G128900.1	-1158
MA1377.1	PLT1	chr6B	179661014	179661032	-	14.6623	5.06e-06	0.0241	TGCACGCGTCCCAAAAAAA	98	IP_peak_22474	chr6B	179660438	179661088	651	179660916	12.12	9.8276	16.1116	11.7794	Promoter (1-2kb)	chr6B	179656249	179659437	3189	4	-	TraesCS6B02G260400LC	TraesCS6B02G260400LC.1	-1479
MA1377.1	PLT1	chr7A	610495928	610495946	+	13.7662	9.35e-06	0.0367	GTCACACATTCCAAAAAAA	5	IP_peak_25686	chr7A	610495875	610496454	580	610495923	16.44	5.05102	8.92804	5.18368	Promoter (<=1kb)	chr7A	610496792	610498239	1448	2	+	TraesCS7A02G419100	TraesCS7A02G419100.1	-869
MA1377.1	PLT1	chr2B	746078898	746078916	-	13.6364	1.02e-05	0.0392	TTCACGAATTTCTAAAAAA	93	IP_peak_6716	chr2B	746078707	746078977	271	746078805	6.06	5.20154	6.97051	3.48617	Promoter (1-2kb)	chr2B	746080418	746081638	1221	3	+	TraesCS2B02G550100	TraesCS2B02G550100.1	-1613
MA1377.1	PLT1	chr5A	462829450	462829468	-	13.6234	1.03e-05	0.0395	TTCACGTGTTTCGAAGAAG	0	IP_peak_17354	chr5A	462829338	462829560	223	462829454	10.38	5.69221	7.99793	4.33317	Promoter (<=1kb)	chr5A	462829978	462831090	1113	1	+	TraesCS5A02G371200LC	TraesCS5A02G371200LC.1	-524
MA1377.1	PLT1	chr3A	663601019	663601037	-	13.4545	1.15e-05	0.0421	GTTACGATTTCCAAAAAAA	-66	IP_peak_9477	chr3A	663600881	663601204	324	663601103	14.71	9.94485	15.9027	11.5802	Promoter (1-2kb)	chr3A	663579033	663599409	20377	33	-	TraesCS3A02G422800	TraesCS3A02G422800.2	-1694
MA1377.1	PLT1	chr7D	501086630	501086648	+	13.1818	1.36e-05	0.0475	GGCACTTAATTCAAGAAAG	43	IP_peak_28572	chr7D	501086460	501086743	284	501086587	15.58	5.52554	9.31879	5.42768	Promoter (1-2kb)	chr7D	501088545	501092066	3522	2	+	TraesCS7D02G387100	TraesCS7D02G387100.1	-1958
MA1377.1	PLT1	chr6A	24429440	24429458	+	13.0649	1.47e-05	0.05	TTCACAAATTTCAAAAAAA	0	IP_peak_20773	chr6A	24429282	24429585	304	24429445	13.85	7.42295	11.3449	7.27452	Promoter (1-2kb)	chr6A	24426216	24427639	1424	1	-	TraesCS6A02G048300	TraesCS6A02G048300.1	-1806
MA1377.1	PLT1	chr3B	9089205	9089223	+	12.8052	1.73e-05	0.0561	TTCACAATTTCCAAAAAAG	-145	IP_peak_9845	chr3B	9089118	9089446	329	9089368	10.38	6.01695	8.5009	4.79101	Promoter (<=1kb)	chr3B	9090142	9094049	3908	5	+	TraesCS3B02G021400	TraesCS3B02G021400.1	-774
MA1377.1	PLT1	chr6D	62896225	62896243	+	12.7273	1.81e-05	0.0582	TGCACATATTTCAAAAAAT	-2	IP_peak_23606	chr6D	62896154	62896398	245	62896245	12.98	6.99026	10.1966	6.23501	Promoter (<=1kb)	chr6D	62893651	62895569	1919	3	-	TraesCS6D02G115800LC	TraesCS6D02G115800LC.1	-676
MA1377.1	PLT1	chr6D	473423963	473423981	-	12.7143	1.83e-05	0.0586	GTCACATTTTTCAAAAAAA	-6	IP_peak_24378	chr6D	473423802	473424056	255	473423987	11.25	9.66363	15.6574	11.3383	Promoter (1-2kb)	chr6D	473418397	473422743	4347	7	-	TraesCS6D02G408000	TraesCS6D02G408000.1	-1244
MA1377.1	PLT1	chr3D	66556997	66557015	-	12.6494	1.9e-05	0.0602	TTCACAAATTTCAAAAAAG	-40	IP_peak_11652	chr3D	66556551	66557149	599	66557055	10.38	7.87288	11.6355	7.5455	Promoter (<=1kb)	chr3D	66557706	66560210	2505	1	+	TraesCS3D02G123700LC	TraesCS3D02G123700LC.1	-651
MA1377.1	PLT1	chr2D	78713109	78713127	+	12.5974	1.96e-05	0.0616	TTCACGAGTTTCAAAACAA	-74	IP_peak_7141	chr2D	78712825	78713362	538	78713201	12.98	10.6541	16.4921	12.1075	Promoter (1-2kb)	chr2D	78711391	78711840	450	1	-	TraesCS2D02G145500LC	TraesCS2D02G145500LC.1	-1361
MA1377.1	PLT1	chr2A	79170892	79170910	+	12.5974	1.96e-05	0.0616	TTCACGAGTTTCAAAACAA	35	IP_peak_3849	chr2A	79170738	79171148	411	79170857	12.98	6.99026	10.1966	6.23501	Promoter (1-2kb)	chr2A	79171931	79174812	2882	2	+	TraesCS2A02G131700	TraesCS2A02G131700.1	-1074
MA1377.1	PLT1	chr1D	334457453	334457471	-	12.5455	2.02e-05	0.063	GACACATATTCCAAAAAAT	-112	IP_peak_3154	chr1D	334457435	334457735	301	334457583	10.38	6.01695	8.5009	4.79101	Promoter (1-2kb)	chr1D	334459370	334464172	4803	9	+	TraesCS1D02G244000	TraesCS1D02G244000.1	-1787
MA1377.1	PLT1	chr7D	549290709	549290727	-	12.4935	2.09e-05	0.0646	ATCACGAGTTCCAAAAAAA	-175	IP_peak_28667	chr7D	549290668	549291037	370	549290902	9.52	6.85175	9.48519	5.59069	Promoter (<=1kb)	chr7D	549287135	549290348	3214	12	-	TraesCS7D02G429400	TraesCS7D02G429400.1	-554
MA1377.1	PLT1	chr7B	97866615	97866633	+	12.4805	2.11e-05	0.065	GGCACGAAATACCATGAAA	32	IP_peak_26298	chr7B	97866396	97866702	307	97866583	6.92	6.79165	9.21445	5.3363	Promoter (<=1kb)	chr7B	97867285	97871163	3879	2	+	TraesCS7B02G085700	TraesCS7B02G085700.1	-702
MA1377.1	PLT1	chr1D	432404038	432404056	+	12.4286	2.17e-05	0.0663	TTCACGTGTTTCAATAAAG	-128	IP_peak_3372	chr1D	432404006	432404480	475	432404184	12.98	4.66017	6.6833	3.25404	Promoter (1-2kb)	chr1D	432405975	432409735	3761	2	+	TraesCS1D02G343400	TraesCS1D02G343400.1	-1791
MA1377.1	PLT1	chr2D	7530446	7530464	-	12.3636	2.26e-05	0.0684	TTCACAAATTTCAAAAAGA	-3	IP_peak_6879	chr2D	7530285	7530616	332	7530467	11.25	6.47431	9.63232	5.72609	Promoter (1-2kb)	chr2D	7525749	7528527	2779	6	-	TraesCS2D02G015500	TraesCS2D02G015500.2	-1940
MA1377.1	PLT1	chr5D	40096446	40096464	-	12.2857	2.37e-05	0.0708	GTCACACATTTCAAAAATA	85	IP_peak_19536	chr5D	40096297	40096528	232	40096361	10.38	5.94685	8.39177	4.68927	Promoter (1-2kb)	chr5D	40091358	40094384	3027	4	-	TraesCS5D02G039000	TraesCS5D02G039000.2	-1977
MA1377.1	PLT1	chr5D	288805756	288805774	+	12.2857	2.37e-05	0.0708	TTCACGAGTTCCAAAAATA	-59	IP_peak_19916	chr5D	288805678	288806046	369	288805833	11.25	6.12489	9.08008	5.30512	Promoter (1-2kb)	chr5D	288804200	288804667	468	1	-	TraesCS5D02G258600LC	TraesCS5D02G258600LC.1	-1166
MA1377.1	PLT1	chr5D	384631848	384631866	+	12.2597	2.4e-05	0.0717	GGCACAAACTCCGACACGG	-45	IP_peak_20152	chr5D	384631818	384632051	234	384631911	11.25	4.08326	5.86499	2.65755	Promoter (1-2kb)	chr5D	384628012	384629948	1937	2	-	TraesCS5D02G283800	TraesCS5D02G283800.2	-1963
MA1377.1	PLT1	chr4A	617939552	617939570	+	12.1818	2.52e-05	0.0743	TTCATGCATTTCAAGAAAA	-49	IP_peak_13974	chr4A	617939363	617939728	366	617939619	11.25	5.79166	8.55828	4.84154	Promoter (<=1kb)	chr4A	617933283	617938877	5595	7	-	TraesCS4A02G335200	TraesCS4A02G335200.1	-742
MA1377.1	PLT1	chr6D	438455973	438455991	+	12.1688	2.54e-05	0.0748	GGCACATATTTCCAAAAAA	-64	IP_peak_24244	chr6D	438455904	438456268	365	438456055	11.25	7.75382	11.7527	7.65822	Promoter (<=1kb)	chr6D	438456804	438457900	1097	2	+	TraesCS6D02G338200	TraesCS6D02G338200.1	-749
MA1377.1	PLT1	chr5A	637617056	637617074	-	12.1558	2.56e-05	0.0752	TACACAAATTCCAAAAATG	70	IP_peak_17792	chr5A	637616919	637617152	234	637616986	6.92	4.87734	5.37022	2.22818	Promoter (1-2kb)	chr5A	637618562	637622714	4153	2	+	TraesCS5A02G457700	TraesCS5A02G457700.1	-1576
MA1377.1	PLT1	chr7A	543367681	543367699	+	12.1429	2.58e-05	0.0756	TTCACATATTTCAAAAAAA	0	IP_peak_25521	chr7A	543367468	543367762	295	543367687	12.12	6.2008	9.62777	5.72452	Promoter (1-2kb)	chr7A	543365603	543366076	474	2	-	TraesCS7A02G528100LC	TraesCS7A02G528100LC.1	-1611
MA1377.1	PLT1	chr2B	71297313	71297331	+	12.1299	2.59e-05	0.0761	GGCACACTTTTCAAGCATA	-4	IP_peak_5440	chr2B	71297184	71297477	294	71297335	15.58	6.47245	10.8621	6.85299	Promoter (1-2kb)	chr2B	71295590	71296180	591	1	-	TraesCS2B02G142900LC	TraesCS2B02G142900LC.1	-1155
MA1377.1	PLT1	chr5D	444170809	444170827	-	12.1299	2.59e-05	0.0761	TTCACACATTTCAAAAAAG	63	IP_peak_20312	chr5D	444170578	444170832	255	444170746	14.71	5.23709	8.41215	4.70692	Promoter (1-2kb)	chr5D	444165669	444169296	3628	4	-	TraesCS5D02G458310LC	TraesCS5D02G458310LC.2	-1450
MA1377.1	PLT1	chr1A	514689326	514689344	+	12.1169	2.61e-05	0.0765	GTCACATTTTCCAAAAAAT	0	IP_peak_1025	chr1A	514689218	514689459	242	514689335	15.58	5.95399	10.0249	6.09418	Promoter (<=1kb)	chr1A	514690116	514692269	2154	5	+	TraesCS1A02G324000	TraesCS1A02G324000.1	-781
MA1377.1	PLT1	chr3A	582952681	582952699	+	12.1039	2.63e-05	0.077	TGTACAATTATCGAAAAAA	-124	IP_peak_9269	chr3A	582952504	582953002	499	582952823	11.25	7.3394	11.0426	6.99154	Promoter (1-2kb)	chr3A	582949530	582951446	1917	3	-	TraesCS3A02G336300	TraesCS3A02G336300.1	-1377
MA1377.1	PLT1	chr4B	173712215	173712233	-	12.0649	2.7e-05	0.078	TTCACAAATTTCAAAAAAT	-207	IP_peak_14640	chr4B	173712164	173712614	451	173712440	17.31	4.98	9.20795	5.3363	Promoter (1-2kb)	chr4B	173713686	173716230	2545	6	+	TraesCS4B02G133900	TraesCS4B02G133900.1	-1246
MA1377.1	PLT1	chr4D	124264882	124264900	-	12.039	2.74e-05	0.0789	TTCACGTGTTTCAAAAAAA	17	IP_peak_15809	chr4D	124264690	124265049	360	124264865	16.44	8.721	14.9606	10.6567	Promoter (1-2kb)	chr4D	124259676	124263391	3716	2	-	TraesCS4D02G140800	TraesCS4D02G140800.1	-1474
MA1377.1	PLT1	chr2D	11199711	11199729	-	12	2.8e-05	0.0803	TTCACGAGTTCCAAAACAT	-83	IP_peak_6909	chr2D	11199659	11200043	385	11199812	12.12	5.60935	8.68779	4.96	Promoter (1-2kb)	chr2D	11194726	11198310	3585	4	-	TraesCS2D02G026400	TraesCS2D02G026400.1	-1502
MA1377.1	PLT1	chr7A	70106744	70106762	+	11.987	2.82e-05	0.0807	TTCACAAATTTCAAAAATA	27	IP_peak_24627	chr7A	70106624	70107110	487	70106717	10.38	4.86911	6.74011	3.30472	Promoter (<=1kb)	chr7A	70107604	70107921	318	1	+	TraesCS7A02G114000	TraesCS7A02G114000.1	-887
MA1377.1	PLT1	chr3D	103787089	103787107	-	11.974	2.84e-05	0.0812	TTCACAAATTCCAAAAATG	96	IP_peak_11725	chr3D	103786932	103787195	264	103786993	12.12	5.1209	7.90674	4.26402	Promoter (<=1kb)	chr3D	103787682	103790533	2852	10	+	TraesCS3D02G141700	TraesCS3D02G141700.1	-689
MA1377.1	PLT1	chrUn	81295310	81295328	-	11.961	2.86e-05	0.0816	TTCACGAGTTTCAAAAAAT	-159	IP_peak_29157	chrUn	81295211	81295630	420	81295487	13.85	11.7117	19.0636	14.5609	Promoter (<=1kb)	chrUn	81296469	81302814	6346	18	+	TraesCSU02G090500	TraesCSU02G090500.1	-982
MA1377.1	PLT1	chr1A	537343839	537343857	+	11.9351	2.91e-05	0.0826	TTCACATTTTCCAAAACAA	-232	IP_peak_1072	chr1A	537343725	537344259	535	537344089	12.98	8.37636	12.3327	8.21914	Promoter (1-2kb)	chr1A	537345696	537346676	981	1	+	TraesCS1A02G509300LC	TraesCS1A02G509300LC.1	-1607
MA1377.1	PLT1	chr3D	87432497	87432515	+	11.8442	3.07e-05	0.0859	TTCACAGTTTCCAAAAATG	159	IP_peak_11694	chr3D	87432272	87432774	503	87432338	6.06	5.77064	8.34871	4.64755	Promoter (1-2kb)	chr3D	87428651	87431077	2427	3	-	TraesCS3D02G146000LC	TraesCS3D02G146000LC.1	-1261
MA1377.1	PLT1	chr2D	630092050	630092068	+	11.7792	3.18e-05	0.0884	GTTACGCATTTCAAAAAAT	-25	IP_peak_8136	chr2D	630092025	630092260	236	630092093	7.79	5.41005	6.48178	3.07661	Promoter (<=1kb)	chr2D	630089602	630091645	2044	3	-	TraesCS2D02G556800	TraesCS2D02G556800.1	-448
MA1377.1	PLT1	chr3B	256726875	256726893	-	11.7662	3.21e-05	0.0889	TTCACACATTTCAAAACAG	27	IP_peak_10387	chr3B	256726720	256726986	267	256726848	6.06	5.37835	7.35958	3.85322	Promoter (1-2kb)	chr3B	256728509	256730515	2007	2	+	TraesCS3B02G215600	TraesCS3B02G215600.1	-1661
MA1377.1	PLT1	chr2B	111358117	111358135	-	11.7273	3.28e-05	0.0905	AACCCGGTCCCCAAGAAAA	-118	IP_peak_5534	chr2B	111358099	111358352	254	111358253	8.65	6.47623	8.53429	4.82236	Promoter (1-2kb)	chr2B	111359518	111361392	1875	1	+	TraesCS2B02G145500	TraesCS2B02G145500.1	-1265
MA1377.1	PLT1	chr2A	632598008	632598026	-	11.7143	3.3e-05	0.091	TTCACATAATTCGAAAAAA	-106	IP_peak_4764	chr2A	632597803	632598305	503	632598132	12.12	4.37172	6.6833	3.25404	Promoter (1-2kb)	chr2A	632592054	632596581	4528	9	-	TraesCS2A02G386700	TraesCS2A02G386700.1	-1551
MA1377.1	PLT1	chr7B	468408746	468408764	+	11.6753	3.38e-05	0.0928	AACACAAATATCAAAAAAA	55	IP_peak_26889	chr7B	468408667	468409121	455	468408691	8.65	4.92795	6.09666	2.75284	Promoter (<=1kb)	chr7B	468405026	468407892	2867	5	-	TraesCS7B02G254100	TraesCS7B02G254100.2	-799
MA1377.1	PLT1	chr6B	624176250	624176268	+	11.6623	3.4e-05	0.0931	TTCACGGGTTTTGAGGAAA	38	IP_peak_23153	chr6B	624176041	624176320	280	624176212	11.25	6.12489	9.08008	5.30512	Promoter (1-2kb)	chr6B	624177619	624177870	252	1	+	TraesCS6B02G643100LC	TraesCS6B02G643100LC.1	-1407
MA1377.1	PLT1	chr4A	733763828	733763846	+	11.5844	3.56e-05	0.0962	GATACGGCTACCGAAGCAA	88	IP_peak_14266	chr4A	733763634	733763913	280	733763740	17.31	4.57684	8.44714	4.74071	Promoter (1-2kb)	chr4A	733764877	733766526	1650	3	+	TraesCS4A02G711300LC	TraesCS4A02G711300LC.1	-1137
MA1377.1	PLT1	chr5A	35653886	35653904	+	11.5714	3.58e-05	0.0966	TACACAGATACCAAAAATG	-27	IP_peak_16589	chr5A	35653806	35654150	345	35653931	7.79	4.64484	5.34496	2.20598	Promoter (1-2kb)	chr5A	35654952	35657519	2568	2	+	TraesCS5A02G038500	TraesCS5A02G038500.1	-1021
MA1377.1	PLT1	chr3A	560677934	560677952	-	11.5584	3.61e-05	0.0973	TTCACGCATTTTAAGAAAA	-133	IP_peak_9224	chr3A	560677902	560678127	226	560678085	6.92	5.31516	6.05293	2.71147	Promoter (<=1kb)	chr3A	560678422	560681595	3174	10	+	TraesCS3A02G318700	TraesCS3A02G318700.1	-337
MA1377.1	PLT1	chr7D	530348529	530348547	+	11.5455	3.64e-05	0.0977	TTCACACATTtCAAAAAAT	-30	IP_peak_28623	chr7D	530348261	530348774	514	530348577	13.85	4.94863	7.53305	3.97097	Promoter (1-2kb)	chr7D	530349625	530351152	1528	2	+	TraesCS7D02G411600	TraesCS7D02G411600.1	-1048
MA1377.1	PLT1	chr2B	513502778	513502796	-	11.5065	3.72e-05	0.0994	TTCACAGATTCCAAAAATT	62	IP_peak_6248	chr2B	513502575	513502967	393	513502716	12.12	9.99463	16.4921	12.1075	Promoter (1-2kb)	chr2B	513496463	513501370	4908	4	-	TraesCS2B02G360400	TraesCS2B02G360400.2	-1346
MA1377.1	PLT1	chr4B	21146670	21146688	-	11.4675	3.8e-05	0.101	TTCACACATTTCAAAAATA	17	IP_peak_14361	chr4B	21146578	21146829	252	21146653	9.52	5.25952	6.95302	3.47631	Promoter (<=1kb)	chr4B	21146877	21149413	2537	8	+	TraesCS4B02G028100	TraesCS4B02G028100.1	-224
MA1377.1	PLT1	chr2D	157127536	157127554	+	11.4675	3.8e-05	0.101	TTCACACATTTCAAAAATA	-10	IP_peak_7310	chr2D	157127390	157127842	453	157127564	15.58	7.08982	11.8425	7.74557	Promoter (1-2kb)	chr2D	157129129	157133710	4582	6	+	TraesCS2D02G205400	TraesCS2D02G205400.2	-1565
MA1377.1	PLT1	chr4D	505360929	505360947	+	11.4675	3.8e-05	0.101	TTCACGACTTCCAAAAATA	3	IP_peak_16453	chr4D	505360624	505361049	426	505360926	10.38	3.79481	5.08049	1.98909	Promoter (<=1kb)	chr4D	505361453	505361596	144	1	+	TraesCS4D02G465800LC	TraesCS4D02G465800LC.1	-527
MA1377.1	PLT1	chr5A	702466379	702466397	-	11.4675	3.8e-05	0.101	GTCACGTTTTTCTAAAAGC	-49	IP_peak_17964	chr5A	702466294	702466764	471	702466446	11.25	7.64589	11.5649	7.48365	Promoter (<=1kb)	chr5A	702461602	702466163	4562	6	-	TraesCS5A02G548400	TraesCS5A02G548400.1	-283
MA1377.1	PLT1	chr2A	25117224	25117242	-	11.4156	3.91e-05	0.103	TTCTCGGATTTCAAAAAAT	132	IP_peak_3706	chr2A	25116904	25117322	419	25117092	11.25	8.47132	13.0666	8.8809	Promoter (<=1kb)	chr2A	25115268	25116161	894	1	-	TraesCS2A02G054100LC	TraesCS2A02G054100LC.1	-931
MA1377.1	PLT1	chr4D	93762328	93762346	+	11.3506	4.06e-05	0.106	TACTCGGTTTTCAAAAAAT	-206	IP_peak_15761	chr4D	93761917	93762692	776	93762552	6.92	6.72341	9.01018	5.25107	Promoter (<=1kb)	chr4D	93759325	93761686	2362	3	-	TraesCS4D02G113200	TraesCS4D02G113200.1	-866
MA1377.1	PLT1	chr6B	669911554	669911572	-	11.3117	4.15e-05	0.108	GTCGCGAATTCCCAAAAAG	94	IP_peak_23249	chr6B	669911285	669911591	307	669911460	11.25	6.47431	9.63232	5.72609	Promoter (1-2kb)	chr6B	669908074	669910008	1935	4	-	TraesCS6B02G394600	TraesCS6B02G394600.1	-1452
MA1377.1	PLT1	chr4D	374624122	374624140	-	11.2987	4.18e-05	0.109	TTCACACTTTTCAAAAAAT	-40	IP_peak_16105	chr4D	374623979	374624264	286	374624180	15.58	6.47245	10.8621	6.85299	Promoter (1-2kb)	chr4D	374625550	374625789	240	1	+	TraesCS4D02G312100LC	TraesCS4D02G312100LC.1	-1370
MA1377.1	PLT1	chr3B	823327503	823327521	+	11.2987	4.18e-05	0.109	TTCACAAATCTTGAGAAAA	-5	IP_peak_11409	chr3B	823327366	823327613	248	823327526	5.19	4.03339	4.68433	1.6582	Promoter (<=1kb)	chr3B	823328283	823329432	1150	3	+	TraesCS3B02G604700	TraesCS3B02G604700.1	-757
MA1377.1	PLT1	chr3A	479470998	479471016	+	11.2597	4.27e-05	0.11	TACACAAATTCCAAAATTG	102	IP_peak_9064	chr3A	479470838	479471127	290	479470896	7.79	5.89569	7.26834	3.77083	Promoter (<=1kb)	chr3A	479470116	479470382	267	1	-	TraesCS3A02G386300LC	TraesCS3A02G386300LC.1	-514
MA1377.1	PLT1	chr5A	503939779	503939797	-	11.2078	4.39e-05	0.113	TTCACAAATTTCTAAAAAA	-20	IP_peak_17454	chr5A	503939613	503940042	430	503939817	15.58	8.28831	13.7287	9.50863	Promoter (1-2kb)	chr5A	503941562	503947466	5905	13	+	TraesCS5A02G295700	TraesCS5A02G295700.1	-1745
MA1377.1	PLT1	chr1A	550314858	550314876	-	11.2078	4.39e-05	0.113	AGCCCGCGCCCCGAGGAAT	-50	IP_peak_1124	chr1A	550314783	550315062	280	550314926	12.12	9.66607	15.7562	11.4349	Promoter (<=1kb)	chr1A	550311432	550314872	3441	5	-	TraesCS1A02G375600	TraesCS1A02G375600.2	-54
MA1377.1	PLT1	chr3D	130972526	130972544	-	11.1429	4.55e-05	0.116	TTCACATATTTCAAAAAAT	-200	IP_peak_11777	chr3D	130972149	130972829	681	130972744	7.79	7.53345	10.897	6.85299	Promoter (1-2kb)	chr3D	130974039	130974383	345	1	+	TraesCS3D02G185200LC	TraesCS3D02G185200LC.1	-1295
MA1377.1	PLT1	chr3D	482605190	482605208	+	11.1299	4.59e-05	0.116	TTCACGCAATTTGAGAAAA	-83	IP_peak_12307	chr3D	482605036	482605303	268	482605291	11.25	3.54741	4.97977	1.91819	Promoter (<=1kb)	chr3D	482597141	482604630	7490	10	-	TraesCS3D02G369900	TraesCS3D02G369900.1	-661
MA1377.1	PLT1	chr1D	492148705	492148723	-	11.1299	4.59e-05	0.116	ATCACACTTATCTAGATAA	66	IP_peak_3580	chr1D	492148474	492148756	283	492148639	5.19	5.30804	7.58964	3.97097	Promoter (1-2kb)	chr1D	492144622	492147426	2805	8	-	TraesCS1D02G586800LC	TraesCS1D02G586800LC.1	-1213
MA1377.1	PLT1	chr2B	652617300	652617318	+	11.1299	4.59e-05	0.116	TGCTCGTGTTCCTAGAAAT	-135	IP_peak_6505	chr2B	652617179	652617466	288	652617453	8.65	4.82684	5.94877	2.69714	Promoter (<=1kb)	chr2B	652616569	652616952	384	1	-	TraesCS2B02G693400LC	TraesCS2B02G693400LC.1	-501
MA1377.1	PLT1	chr5D	477315554	477315572	-	11.1169	4.62e-05	0.117	TTCACAATTTTCAAAAAGT	0	IP_peak_20408	chr5D	477315428	477315809	382	477315567	10.38	8.67569	13.2863	9.08334	Promoter (<=1kb)	chr5D	477312549	477315228	2680	8	-	TraesCS5D02G414900	TraesCS5D02G414900.1	-339
MA1377.1	PLT1	chr4B	583237967	583237985	-	11.1039	4.65e-05	0.118	GACACGTATTACCATGTAA	-61	IP_peak_15308	chr4B	583237954	583238182	229	583238046	10.38	7.87288	11.6355	7.5455	Promoter (<=1kb)	chr4B	583238216	583243292	5077	12	+	TraesCS4B02G297900	TraesCS4B02G297900.2	-170
MA1377.1	PLT1	chr2B	219298675	219298693	-	11.0779	4.72e-05	0.119	TTCATGGATTTCGAAAAAA	-128	IP_peak_5757	chr2B	219298594	219298833	240	219298821	8.65	4.82684	5.94877	2.69714	Promoter (1-2kb)	chr2B	219294954	219297536	2583	3	-	TraesCS2B02G227400	TraesCS2B02G227400.2	-1285
MA1377.1	PLT1	chr2A	698124535	698124553	+	11.0519	4.79e-05	0.12	TTCACACATTTCAAGCAAA	-97	IP_peak_4920	chr2A	698124514	698124815	302	698124650	11.25	5.79166	8.55828	4.84154	Promoter (1-2kb)	chr2A	698121726	698122841	1116	1	-	TraesCS2A02G608600LC	TraesCS2A02G608600LC.1	-1809
MA1377.1	PLT1	chr5B	415057616	415057634	+	11.039	4.82e-05	0.121	TTCATGTTTTCCAAGATAA	19	IP_peak_18747	chr5B	415057424	415057684	261	415057597	8.65	6.47623	8.53429	4.82236	Promoter (1-2kb)	chr5B	415055380	415055718	339	1	-	TraesCS5B02G379500LC	TraesCS5B02G379500LC.1	-1879
MA1377.1	PLT1	chr1A	457943852	457943870	-	11.026	4.86e-05	0.121	GGTACCAATTTCGAAAAAA	4	IP_peak_859	chr1A	457943670	457944020	351	457943848	7.79	4.39416	4.98931	1.91819	Promoter (1-2kb)	chr1A	457945325	457945945	621	1	+	TraesCS1A02G262500	TraesCS1A02G262500.1	-1477
MA1377.1	PLT1	chr3A	42321463	42321481	-	10.987	4.96e-05	0.123	TTCACAAATTTCAAAAATT	134	IP_peak_8305	chr3A	42321012	42321613	602	42321329	11.25	9.66363	15.6574	11.3383	Promoter (<=1kb)	chr3A	42319830	42320329	500	2	-	TraesCS3A02G070200	TraesCS3A02G070200.1	-1000
MA1377.1	PLT1	chr5D	302824689	302824707	-	10.987	4.96e-05	0.123	TTCACGAGTTCCCAAAAAA	0	IP_peak_19937	chr5D	302824580	302824839	260	302824698	7.79	4.15509	4.65474	1.63345	Promoter (1-2kb)	chr5D	302826483	302827971	1489	2	+	TraesCS5D02G200100	TraesCS5D02G200100.1	-1785
MA1377.1	PLT1	chr3D	590152769	590152787	+	10.987	4.96e-05	0.123	TTTACGAATTCCAAAATAT	-27	IP_peak_12596	chr3D	590152346	590153018	673	590152814	11.25	8.47132	13.0666	8.8809	Promoter (<=1kb)	chr3D	590153716	590154895	1180	3	+	TraesCS3D02G609300LC	TraesCS3D02G609300LC.1	-902
MA1377.1	PLT1	chr7D	400471600	400471618	-	10.974	5e-05	0.124	TACACAAATTTCTAAAAAG	-6	IP_peak_28359	chr7D	400471511	400471866	356	400471624	9.52	6.30244	8.56867	4.84706	Promoter (1-2kb)	chr7D	400468878	400470513	1636	5	-	TraesCS7D02G314600	TraesCS7D02G314600.1	-1111
MA1377.1	PLT1	chr7D	16707596	16707614	-	10.961	5.03e-05	0.125	TTCACGTGTTTCAAAAATA	0	IP_peak_27631	chr7D	16707388	16707635	248	16707611	10.38	6.01695	8.5009	4.79101	Promoter (<=1kb)	chr7D	16708015	16711544	3530	3	+	TraesCS7D02G031900	TraesCS7D02G031900.1	-404
MA1377.1	PLT1	chr2D	110936941	110936959	-	10.961	5.03e-05	0.125	TTCACGTGTTTCAAAAATA	15	IP_peak_7205	chr2D	110936671	110937090	420	110936926	10.38	6.82092	9.78691	5.87046	Promoter (<=1kb)	chr2D	110937430	110943241	5812	9	+	TraesCS2D02G166900	TraesCS2D02G166900.1	-504
MA1377.1	PLT1	chr6B	372581851	372581869	-	10.961	5.03e-05	0.125	TTCCCGCATTTCAAAAAAA	59	IP_peak_22718	chr6B	372581713	372581979	267	372581792	20.77	7.25628	14.2141	9.97722	Promoter (<=1kb)	chr6B	372574888	372581058	6171	4	-	TraesCS6B02G230500	TraesCS6B02G230500.1	-734
MA1377.1	PLT1	chr7B	537162153	537162171	+	10.961	5.03e-05	0.125	TTCACGCGTTTCAAAACAC	-111	IP_peak_27043	chr7B	537162119	537162601	483	537162282	10.38	7.87288	11.6355	7.5455	Promoter (<=1kb)	chr7B	537162890	537169258	6369	11	+	TraesCS7B02G501300LC	TraesCS7B02G501300LC.1	-608
MA1377.1	PLT1	chr4A	623350035	623350053	+	10.961	5.03e-05	0.125	GACACGTCAAACGAGAAGA	-108	IP_peak_13982	chr4A	623349808	623350295	488	623350161	6.06	6.04984	9.21445	5.3363	Promoter (<=1kb)	chr4A	623350457	623351259	803	2	+	TraesCS4A02G508800LC	TraesCS4A02G508800LC.1	-296
MA1377.1	PLT1	chr5D	238664819	238664837	-	10.9481	5.07e-05	0.125	TTCCCGCATTCCAAAAAAG	82	IP_peak_19846	chr5D	238664571	238664965	395	238664737	14.71	7.42823	11.86	7.76138	Promoter (<=1kb)	chr5D	238665736	238667018	1283	3	+	TraesCS5D02G222400LC	TraesCS5D02G222400LC.1	-999
MA1377.1	PLT1	chr3B	50229825	50229843	+	10.8831	5.25e-05	0.129	TTTACGCATTTCAAAAATA	25	IP_peak_9982	chr3B	50229677	50229910	234	50229800	6.06	5.56759	7.81133	4.17224	Promoter (1-2kb)	chr3B	50231155	50231504	350	2	+	TraesCS3B02G079300	TraesCS3B02G079300.1	-1355
MA1377.1	PLT1	chr1B	682001889	682001907	+	10.8831	5.25e-05	0.129	TACATGTATTTCAAGAATA	79	IP_peak_2550	chr1B	682001711	682001996	286	682001810	9.52	6.65831	9.15511	5.3363	Promoter (1-2kb)	chr1B	682003160	682005034	1875	4	+	TraesCS1B02G474000	TraesCS1B02G474000.1	-1350
MA1377.1	PLT1	chr7D	533429518	533429536	+	10.7792	5.55e-05	0.134	TTCACATTTTTCAAAAAAC	-56	IP_peak_28627	chr7D	533429438	533429698	261	533429592	5.19	5.30804	7.58964	3.97097	Promoter (<=1kb)	chr7D	533430063	533430629	567	3	+	TraesCS7D02G414800	TraesCS7D02G414800.1	-471
MA1377.1	PLT1	chr4A	534830972	534830990	+	10.7662	5.59e-05	0.135	TTCACAAATACTGAGAAAA	-4	IP_peak_13752	chr4A	534830842	534831142	301	534830994	12.12	6.55758	10.1966	6.23501	Promoter (1-2kb)	chr4A	534832693	534833580	888	2	+	TraesCS4A02G374800LC	TraesCS4A02G374800LC.1	-1699
MA1377.1	PLT1	chr6A	609318929	609318947	+	10.7403	5.67e-05	0.136	CTCACGTGTTTCCAGAAAA	157	IP_peak_22022	chr6A	609318743	609319124	382	609318772	11.25	4.08326	5.86499	2.65755	Promoter (1-2kb)	chr6A	609316075	609317365	1291	2	-	TraesCS6A02G599700LC	TraesCS6A02G599700LC.1	-1407
MA1377.1	PLT1	chr5D	557549459	557549477	+	10.6753	5.87e-05	0.14	TTCACAAATTTCAAAATTG	34	IP_peak_20650	chr5D	557549241	557549551	311	557549425	7.79	6.27098	7.93129	4.28499	Promoter (1-2kb)	chr5D	557543729	557547776	4048	9	-	TraesCS5D02G552000	TraesCS5D02G552000.1	-1649
MA1377.1	PLT1	chr7B	592349989	592350007	+	10.6753	5.87e-05	0.14	TTCACGAAATTCAAAATTT	-46	IP_peak_27141	chr7B	592349947	592350202	256	592350053	9.52	5.55958	7.40679	3.8892	Promoter (1-2kb)	chr7B	592347594	592348439	846	1	-	TraesCS7B02G337400	TraesCS7B02G337400.1	-1614
MA1377.1	PLT1	chr5A	708181723	708181741	+	10.6753	5.87e-05	0.14	TTCACAAATTTCAAAATTG	0	IP_peak_17990	chr5A	708181430	708181835	406	708181738	12.12	7.85788	12.3327	8.21914	Promoter (1-2kb)	chr5A	708183055	708184124	1070	2	+	TraesCS5A02G557100	TraesCS5A02G557100.1	-1317
MA1377.1	PLT1	chr3A	429748985	429749003	+	10.6494	5.95e-05	0.141	CACACGAGTTTCAAAAAAG	-26	IP_peak_8963	chr3A	429748923	429749184	262	429749029	8.65	5.63341	7.15642	3.66445	Promoter (1-2kb)	chr3A	429750997	429751878	882	1	+	TraesCS3A02G348500LC	TraesCS3A02G348500LC.1	-1968
MA1377.1	PLT1	chr3B	530244199	530244217	+	10.6494	5.95e-05	0.141	ATCTCAGAACCCAAGAAAG	50	IP_peak_10739	chr3B	530243977	530244222	246	530244149	5.19	4.4185	5.38458	2.23895	Promoter (<=1kb)	chr3B	530242529	530244132	1604	1	-	TraesCS3B02G328500	TraesCS3B02G328500.1	-17
MA1377.1	PLT1	chr3D	600084141	600084159	+	10.6494	5.95e-05	0.141	TTCACGGATTTCAGAAAAA	28	IP_peak_12650	chr3D	600084008	600084324	317	600084113	13.85	7.1703	10.9593	6.91336	Promoter (1-2kb)	chr3D	600081895	600082764	870	3	-	TraesCS3D02G630800LC	TraesCS3D02G630800LC.1	-1349
MA1377.1	PLT1	chrUn	103126184	103126202	-	10.6234	6.04e-05	0.143	TACAGAATTTTCGAGAAAT	-111	IP_peak_29222	chrUn	103126099	103126467	369	103126313	12.98	7.95138	11.6619	7.5713	Promoter (1-2kb)	chrUn	103127962	103129200	1239	1	+	TraesCSU02G120000	TraesCSU02G120000.1	-1649
MA1377.1	PLT1	chr6D	426122110	426122128	+	10.6234	6.04e-05	0.143	GGTACATTTTTCGAAAATT	-152	IP_peak_24197	chr6D	426121899	426122335	437	426122280	9.52	6.30244	8.56867	4.84706	Promoter (1-2kb)	chr6D	426120812	426121159	348	1	-	TraesCS6D02G422500LC	TraesCS6D02G422500LC.1	-1121
MA1377.1	PLT1	chr2A	524845762	524845780	+	10.5974	6.12e-05	0.144	TTCCCGCATTTCAAAACAA	0	IP_peak_4570	chr2A	524845444	524845877	434	524845778	12.12	6.55758	10.1966	6.23501	Promoter (1-2kb)	chr2A	524840283	524843840	3558	10	-	TraesCS2A02G305200	TraesCS2A02G305200.2	-1938
MA1377.1	PLT1	chr1B	654812171	654812189	+	10.5974	6.12e-05	0.144	TTCATGCTTTCCGAAAAAA	-65	IP_peak_2464	chr1B	654812062	654812567	506	654812254	12.12	6.55758	10.1966	6.23501	Promoter (1-2kb)	chr1B	654809138	654810487	1350	1	-	TraesCS1B02G430400	TraesCS1B02G430400.1	-1767
MA1377.1	PLT1	chr3B	812684702	812684720	-	10.5974	6.12e-05	0.144	TACACATTTACCGAAATGT	33	IP_peak_11356	chr3B	812684616	812684909	294	812684669	8.65	4.82684	5.94877	2.69714	Promoter (1-2kb)	chr3B	812681566	812682866	1301	2	-	TraesCS3B02G586000	TraesCS3B02G586000.1	-1803
MA1377.1	PLT1	chr5D	229183232	229183250	+	10.5584	6.25e-05	0.146	GACACACATTCCCACGCAG	-45	IP_peak_19831	chr5D	229182393	229183467	1075	229183295	6.06	6.04984	9.21445	5.3363	Promoter (<=1kb)	chr5D	229184032	229188225	4194	2	+	TraesCS5D02G143400	TraesCS5D02G143400.1	-737
MA1377.1	PLT1	chr2D	30490358	30490376	-	10.5455	6.29e-05	0.147	TTCACAAATTTCAAAAACT	-126	IP_peak_6994	chr2D	30490346	30490636	291	30490502	11.25	6.12489	9.08008	5.30512	Promoter (<=1kb)	chr2D	30482975	30489985	7011	25	-	TraesCS2D02G072800	TraesCS2D02G072800.1	-517
MA1377.1	PLT1	chr6A	535996881	535996899	-	10.5455	6.29e-05	0.147	TTCACAAATTTCAAAAACT	0	IP_peak_21852	chr6A	535996556	535996945	390	535996883	6.06	5.11743	6.79464	3.35747	Promoter (1-2kb)	chr6A	535993403	535995141	1739	2	-	TraesCS6A02G302600	TraesCS6A02G302600.1	-1742
MA1377.1	PLT1	chr1D	450112204	450112222	-	10.5325	6.34e-05	0.147	TTCACAAGTTTCAAAAAAA	-167	IP_peak_3418	chr1D	450111976	450112564	589	450112389	7.79	5.64244	6.84988	3.3933	Promoter (<=1kb)	chr1D	450107124	450111428	4305	10	-	TraesCS1D02G372000	TraesCS1D02G372000.1	-961
MA1377.1	PLT1	chr7D	630519831	630519849	-	10.4675	6.56e-05	0.151	CGCACAATTTTCTAAAAAA	75	IP_peak_28960	chr7D	630519660	630520214	555	630519756	11.25	4.08326	5.86499	2.65755	Promoter (1-2kb)	chr7D	630521540	630524040	2501	2	+	TraesCS7D02G540600	TraesCS7D02G540600.1	-1784
MA1377.1	PLT1	chr5B	41417932	41417950	-	10.4545	6.6e-05	0.152	GACACTCTTTACGAAGAAA	166	IP_peak_18095	chr5B	41417683	41417961	279	41417766	8.65	4.81825	5.93623	2.69714	Promoter (<=1kb)	chr5B	41414574	41417265	2692	2	-	TraesCS5B02G037300	TraesCS5B02G037300.1	-501
MA1377.1	PLT1	chr5B	328375471	328375489	-	10.4545	6.6e-05	0.152	TGCAGGCTTTCCGACGATG	28	IP_peak_18569	chr5B	328375253	328375496	244	328375443	7.79	5.26548	6.25917	2.90391	Promoter (<=1kb)	chr5B	328371308	328375058	3751	6	-	TraesCS5B02G180900	TraesCS5B02G180900.1	-385
MA1377.1	PLT1	chr6D	377337687	377337705	-	10.4416	6.65e-05	0.153	TTTACATAATTCAAGAAAA	-28	IP_peak_24085	chr6D	377337515	377337834	320	377337733	12.12	4.37172	6.6833	3.25404	Promoter (<=1kb)	chr6D	377338191	377343738	5548	17	+	TraesCS6D02G267300	TraesCS6D02G267300.1	-458
MA1377.1	PLT1	chr5A	488318475	488318493	+	10.4156	6.74e-05	0.154	GTCACATGTTCCAAAAAAG	89	IP_peak_17421	chr5A	488318209	488318508	300	488318386	10.38	5.69221	7.99793	4.33317	Promoter (<=1kb)	chr5A	488315672	488317721	2050	4	-	TraesCS5A02G279400	TraesCS5A02G279400.1	-665
MA1377.1	PLT1	chr6A	85282958	85282976	+	10.3766	6.88e-05	0.156	TTCACATTCTCCAATAAAA	17	IP_peak_20924	chr6A	85282770	85283047	278	85282941	12.12	6.55758	10.1966	6.23501	Promoter (1-2kb)	chr6A	85281190	85281465	276	1	-	TraesCS6A02G155300LC	TraesCS6A02G155300LC.1	-1476
MA1377.1	PLT1	chr6A	292624083	292624101	+	10.3636	6.93e-05	0.157	TTCACAGTTTCCAAAATTT	125	IP_peak_21317	chr6A	292623870	292624422	553	292623958	6.06	6.04984	9.21445	5.3363	Promoter (<=1kb)	chr6A	292623330	292623635	306	1	-	TraesCS6A02G316300LC	TraesCS6A02G316300LC.1	-323
MA1377.1	PLT1	chr2A	71615384	71615402	+	10.3506	6.97e-05	0.158	ATCACAAAATTCAAAAAAA	-206	IP_peak_3839	chr2A	71615231	71615698	468	71615608	12.98	4.04861	5.7108	2.51866	Promoter (1-2kb)	chr2A	71612807	71614150	1344	2	-	TraesCS2A02G122100	TraesCS2A02G122100.1	-1458
MA1377.1	PLT1	chr5A	391523003	391523021	+	10.3377	7.02e-05	0.159	GGCGCTCTTTACGAGGCGT	0	IP_peak_17168	chr5A	391522833	391523135	303	391523013	29.42	5.07042	13.5501	9.34396	Promoter (1-2kb)	chr5A	391516937	391521446	4510	2	-	TraesCS5A02G189000	TraesCS5A02G189000.1	-1567
MA1377.1	PLT1	chr2B	634749939	634749957	-	10.3247	7.07e-05	0.16	ATCCCGCATCTCAAAAAAA	146	IP_peak_6461	chr2B	634749722	634750216	495	634749793	6.92	5.93691	7.15828	3.66472	Promoter (1-2kb)	chr2B	634747092	634747868	777	1	-	TraesCS2B02G673000LC	TraesCS2B02G673000LC.1	-1925
MA1377.1	PLT1	chr7B	648046228	648046246	-	10.2727	7.26e-05	0.162	AATACGTATTCCAAAAAAT	52	IP_peak_27276	chr7B	648045315	648046331	1017	648046176	14.71	3.92781	6.17368	2.8277	Promoter (1-2kb)	chr7B	648042287	648045080	2794	8	-	TraesCS7B02G382200	TraesCS7B02G382200.1	-1096
MA1377.1	PLT1	chr7B	676450744	676450762	+	10.2468	7.36e-05	0.164	TTCACGCATCTCAGAAAAA	92	IP_peak_27356	chr7B	676450554	676450803	250	676450652	6.92	6.79165	9.21445	5.3363	Promoter (1-2kb)	chr7B	676452352	676453615	1264	3	+	TraesCS7B02G684400LC	TraesCS7B02G684400LC.1	-1700
MA1377.1	PLT1	chr7D	28046198	28046216	-	10.2208	7.46e-05	0.165	GGCGGGAACCCCGAGGCGC	0	IP_peak_27674	chr7D	28046069	28046323	255	28046203	6.92	6.25026	7.81133	4.17224	Promoter (<=1kb)	chr7D	28046271	28049365	3095	1	+	TraesCS7D02G053600	TraesCS7D02G053600.1	-68
MA1377.1	PLT1	chr5A	393362992	393363010	+	10.2208	7.46e-05	0.165	TTCACGAATTTTTAGAAAA	-100	IP_peak_17170	chr5A	393362962	393363294	333	393363110	12.12	6.55758	10.1966	6.23501	Promoter (<=1kb)	chr5A	393363595	393365096	1502	4	+	TraesCS5A02G189800	TraesCS5A02G189800.1	-485
MA1377.1	PLT1	chr2D	43950100	43950118	+	10.1818	7.62e-05	0.168	GTCACTAATTTCAAAACTA	-55	IP_peak_7041	chr2D	43950099	43950336	238	43950173	7.79	5.89569	7.26834	3.77083	Promoter (1-2kb)	chr2D	43952088	43952891	804	3	+	TraesCS2D02G092200	TraesCS2D02G092200.1	-1915
MA1377.1	PLT1	chr2B	148591554	148591572	-	10.1818	7.62e-05	0.168	TTCACGTGTTTCTAAAAAA	-146	IP_peak_5587	chr2B	148591491	148591945	455	148591718	10.38	4.86911	6.74011	3.30472	Promoter (1-2kb)	chr2B	148589394	148590588	1195	3	-	TraesCS2B02G174400	TraesCS2B02G174400.1	-1130
MA1377.1	PLT1	chr4A	614020770	614020788	+	10.1688	7.67e-05	0.168	TTCACAAGTTTCAAAACAA	58	IP_peak_13959	chr4A	614020609	614020946	338	614020712	14.71	7.42823	11.86	7.76138	Promoter (1-2kb)	chr4A	614018608	614019552	945	1	-	TraesCS4A02G328100	TraesCS4A02G328100.1	-1160
MA1377.1	PLT1	chr7B	61120029	61120047	+	10.1299	7.82e-05	0.171	TGCAGGAATTTCAAAAAAT	-212	IP_peak_26211	chr7B	61119876	61120354	479	61120259	8.65	4.82684	5.94877	2.69714	Promoter (1-2kb)	chr7B	61117144	61118950	1807	5	-	TraesCS7B02G095600LC	TraesCS7B02G095600LC.1	-1309
MA1377.1	PLT1	chr6A	176572850	176572868	-	10.1039	7.93e-05	0.172	AAAACGAATACCGAAAAAA	2	IP_peak_21115	chr6A	176572784	176573046	263	176572848	12.12	5.94986	9.22902	5.34941	Promoter (<=1kb)	chr6A	176573670	176574753	1084	1	+	TraesCS6A02G169100	TraesCS6A02G169100.1	-822
MA1377.1	PLT1	chr1B	542688310	542688328	+	10.1039	7.93e-05	0.172	TTCACATTTTTCCAAGAAA	-144	IP_peak_2207	chr1B	542688116	542688592	477	542688472	12.12	6.55758	10.1966	6.23501	Promoter (1-2kb)	chr1B	542690121	542696715	6595	11	+	TraesCS1B02G549100LC	TraesCS1B02G549100LC.1	-1649
MA1377.1	PLT1	chr2D	49619622	49619640	+	10.0909	7.98e-05	0.173	ATCACGTGTTTCAAAAATA	-91	IP_peak_7058	chr2D	49619597	49619916	320	49619731	6.92	6.1422	7.57644	3.97097	Promoter (<=1kb)	chr2D	49615797	49619316	3520	8	-	TraesCS2D02G097200	TraesCS2D02G097200.1	-415
MA1377.1	PLT1	chr5B	370080714	370080732	-	10.0909	7.98e-05	0.173	TACATAAATTTCAAGACAA	72	IP_peak_18653	chr5B	370080529	370080820	292	370080642	7.79	5.26548	6.25917	2.90391	Promoter (<=1kb)	chr5B	370081339	370082055	717	2	+	TraesCS5B02G338900LC	TraesCS5B02G338900LC.1	-697
MA1377.1	PLT1	chr1A	522238793	522238811	+	10.0909	7.98e-05	0.173	TACACAGATCTCCACGTAA	-14	IP_peak_1044	chr1A	522238712	522238962	251	522238825	7.79	6.93294	9.28856	5.40112	Promoter (1-2kb)	chr1A	522236430	522237289	860	2	-	TraesCS1A02G335000	TraesCS1A02G335000.1	-1536
MA1377.1	PLT1	chr7D	267874111	267874129	-	10.0649	8.09e-05	0.175	TTCACGAAATACAAAAAAT	3	IP_peak_28187	chr7D	267874029	267874277	249	267874108	8.65	5.78396	7.39136	3.87996	Promoter (<=1kb)	chr7D	267875083	267877395	2313	4	+	TraesCS7D02G278100	TraesCS7D02G278100.1	-975
MA1377.1	PLT1	chr5A	491286895	491286913	+	10.039	8.2e-05	0.176	TTCATGTATTTCGAAAAAA	-26	IP_peak_17423	chr5A	491286608	491287071	464	491286939	7.79	7.18578	9.90484	5.97593	Promoter (<=1kb)	chr5A	491287349	491291222	3874	9	+	TraesCS5A02G282200	TraesCS5A02G282200.1	-410
MA1377.1	PLT1	chr6D	68329679	68329697	+	9.98701	8.42e-05	0.18	TACACGTGTATCTAGATCG	200	IP_peak_23623	chr6D	68329363	68329713	351	68329479	8.65	8.27526	12.6304	8.46143	Promoter (<=1kb)	chr6D	68330020	68335948	5929	4	+	TraesCS6D02G104700	TraesCS6D02G104700.1	-541
MA1377.1	PLT1	chr4B	81366847	81366865	+	9.98701	8.42e-05	0.18	TCCACGAGTTTCGAAAACA	-131	IP_peak_14480	chr4B	81366804	81367175	372	81366996	11.25	6.12489	9.08008	5.30512	Promoter (1-2kb)	chr4B	81363817	81365614	1798	3	-	TraesCS4B02G082600	TraesCS4B02G082600.1	-1382
MA1377.1	PLT1	chr2B	584732178	584732196	-	9.96104	8.53e-05	0.182	TGAACGTTTCTCAAAACAA	-33	IP_peak_6356	chr2B	584732172	584732476	305	584732229	12.98	6.99026	10.1966	6.23501	Promoter (1-2kb)	chr2B	584733255	584733746	492	1	+	TraesCS2B02G625100LC	TraesCS2B02G625100LC.1	-1026
MA1377.1	PLT1	chr4A	76426380	76426398	+	9.94805	8.59e-05	0.182	TTCATGAATTCCAAAAAAA	-55	IP_peak_12904	chr4A	76426157	76426602	446	76426453	10.38	6.01695	8.5009	4.79101	Promoter (1-2kb)	chr4A	76422920	76425286	2367	2	-	TraesCS4A02G077300	TraesCS4A02G077300.1	-1167
MA1377.1	PLT1	chr3A	633911842	633911860	-	9.94805	8.59e-05	0.182	TACGCGAATTTTGAGAAAC	-90	IP_peak_9401	chr3A	633911566	633912231	666	633911950	12.12	6.55758	10.1966	6.23501	Promoter (<=1kb)	chr3A	633907152	633911198	4047	5	-	TraesCS3A02G384300	TraesCS3A02G384300.1	-752
MA1377.1	PLT1	chr2A	33327810	33327828	+	9.93506	8.65e-05	0.183	GGCAGAAATTTCGAAAAAT	0	IP_peak_3737	chr2A	33327723	33327948	226	33327816	6.92	6.03781	7.35958	3.85322	Promoter (<=1kb)	chr2A	33328402	33329688	1287	2	+	TraesCS2A02G075100	TraesCS2A02G075100.1	-586
MA1377.1	PLT1	chr2B	485446284	485446302	+	9.92208	8.71e-05	0.184	TGCACCCTTTTCAAAAAGG	61	IP_peak_6196	chr2B	485446139	485446389	251	485446223	12.98	7.38905	10.7981	6.79844	Promoter (1-2kb)	chr2B	485443168	485444835	1668	1	-	TraesCS2B02G340100	TraesCS2B02G340100.1	-1388
MA1377.1	PLT1	chr7D	575920479	575920497	+	9.92208	8.71e-05	0.184	GGCTCATTAACCAAGAATC	-143	IP_peak_28760	chr7D	575920420	575920816	397	575920640	7.79	4.93572	5.76627	2.5738	Promoter (1-2kb)	chr7D	575918072	575919003	932	2	-	TraesCS7D02G625700LC	TraesCS7D02G625700LC.1	-1637
MA1377.1	PLT1	chr4A	584526565	584526583	-	9.92208	8.71e-05	0.184	TTCACACTTTTCCAAAAAA	33	IP_peak_13876	chr4A	584526395	584526632	238	584526532	12.98	6.99026	10.1966	6.23501	Promoter (<=1kb)	chr4A	584523162	584525722	2561	3	-	TraesCS4A02G275200	TraesCS4A02G275200.2	-810
MA1377.1	PLT1	chr6B	46695121	46695139	+	9.84416	9.06e-05	0.189	TTTACGATTTTCAAAATTG	58	IP_peak_22205	chr6B	46694985	46695420	436	46695063	13.85	6.87413	10.5086	6.52571	Promoter (1-2kb)	chr6B	46696241	46696832	592	1	+	TraesCS6B02G069100	TraesCS6B02G069100.1	-1178
MA1377.1	PLT1	chr3D	26084769	26084787	+	9.81818	9.18e-05	0.191	TTCACGCATTTTGAAAAAA	74	IP_peak_11523	chr3D	26084610	26084848	239	26084695	5.19	5.15711	7.11646	3.62605	Promoter (<=1kb)	chr3D	26083196	26083747	552	1	-	TraesCS3D02G057100LC	TraesCS3D02G057100LC.1	-948
MA1377.1	PLT1	chr7B	186973583	186973601	-	9.77922	9.36e-05	0.193	TACTCGCAACCCGAAATTG	110	IP_peak_26462	chr7B	186973350	186973707	358	186973473	7.79	6.58536	8.53902	4.82648	Promoter (1-2kb)	chr7B	186975259	186976383	1125	2	+	TraesCS7B02G144800	TraesCS7B02G144800.1	-1786
MA1377.1	PLT1	chr7B	143257958	143257976	-	9.76623	9.42e-05	0.194	TGAACTGTTTTCAAGGAAG	-60	IP_peak_26395	chr7B	143257952	143258186	235	143258036	10.38	5.38251	7.52307	3.97097	Promoter (1-2kb)	chr7B	143256105	143256950	846	1	-	TraesCS7B02G193100LC	TraesCS7B02G193100LC.1	-1086
MA1377.1	PLT1	chr6D	27419841	27419859	-	9.75325	9.49e-05	0.195	TGTACACTTTTCAAAAAAC	54	IP_peak_23522	chr6D	27419658	27419898	241	27419787	6.92	6.25026	7.81133	4.17224	Promoter (1-2kb)	chr6D	27417818	27418012	195	1	-	TraesCS6D02G057600	TraesCS6D02G057600.1	-1775
MA1377.1	PLT1	chr3D	112397118	112397136	-	9.75325	9.49e-05	0.195	ATCACGTCTTCCAAAAAAT	225	IP_peak_11749	chr3D	112396694	112397143	450	112396893	10.38	3.79481	5.08049	1.98909	Promoter (1-2kb)	chr3D	112398453	112399127	675	2	+	TraesCS3D02G168700LC	TraesCS3D02G168700LC.1	-1560
MA1377.1	PLT1	chr7D	385517741	385517759	+	9.75325	9.49e-05	0.195	TTCATACATTTCAAGAAAA	-17	IP_peak_28329	chr7D	385517430	385517906	477	385517776	11.25	4.08326	5.86499	2.65755	Promoter (1-2kb)	chr7D	385518931	385520986	2056	5	+	TraesCS7D02G303900	TraesCS7D02G303900.1	-1155
MA1377.1	PLT1	chr3B	15081319	15081337	-	9.74026	9.55e-05	0.196	TGTTCAAATTTCTAGAAAA	-220	IP_peak_9857	chr3B	15081308	15081652	345	15081557	14.71	7.85563	12.5229	8.39108	Promoter (<=1kb)	chr3B	15082078	15083333	1256	3	+	TraesCS3B02G038000LC	TraesCS3B02G038000LC.1	-521
MA1377.1	PLT1	chr2D	320250996	320251014	+	9.72727	9.61e-05	0.197	TTCACAAAATTCAAAAATG	75	IP_peak_7544	chr2D	320250732	320251172	441	320250921	9.52	7.38838	10.4559	6.4733	Promoter (<=1kb)	chr2D	320251425	320254040	2616	3	+	TraesCS2D02G263000	TraesCS2D02G263000.1	-504
MA1377.1	PLT1	chr1D	355084603	355084621	+	9.68831	9.8e-05	0.199	GTTCCGAATTCCAAAAAAA	-43	IP_peak_3195	chr1D	355084470	355084752	283	355084664	12.12	7.85788	12.3327	8.21914	Promoter (1-2kb)	chr1D	355076896	355083304	6409	4	-	TraesCS1D02G260600	TraesCS1D02G260600.1	-1360
MA1377.1	PLT1	chr2A	62695241	62695259	+	9.67532	9.87e-05	0.2	TTCACTGTTTTCAAAAAAT	-138	IP_peak_3822	chr2A	62695107	62695456	350	62695397	10.38	3.79481	5.08049	1.98909	Promoter (<=1kb)	chr2A	62695899	62698094	2196	3	+	TraesCS2A02G111400	TraesCS2A02G111400.1	-502
MA1377.1	PLT1	chr6D	346958160	346958178	+	9.66234	9.93e-05	0.201	GGCACAGACATCAAGCAAT	0	IP_peak_24037	chr6D	346958046	346958291	246	346958178	5.19	5.25471	7.4151	3.8892	Promoter (<=1kb)	chr6D	346953509	346957648	4140	3	-	TraesCS6D02G244900	TraesCS6D02G244900.1	-530
MA1377.1	PLT1	chr2B	641858660	641858678	-	9.66234	9.93e-05	0.201	TGTACAAATTCCCAAAAAA	0	IP_peak_6474	chr2B	641858442	641858839	398	641858673	12.12	7.85788	12.3327	8.21914	Promoter (<=1kb)	chr2B	641859339	641859593	255	1	+	TraesCS2B02G448800	TraesCS2B02G448800.1	-666
MA1377.1	PLT1	chr2D	155115963	155115981	+	9.64935	9.99e-05	0.202	GGCTCATTTTCCAAAACTG	90	IP_peak_7302	chr2D	155115747	155116008	262	155115873	12.98	5.97947	8.68779	4.96	Promoter (1-2kb)	chr2D	155117069	155123084	6016	12	+	TraesCS2D02G202700	TraesCS2D02G202700.1	-1196
MA1377.1	PLT1	chr5B	326505879	326505897	+	9.64935	9.99e-05	0.202	TACACGTTTTACAAGCCAG	-18	IP_peak_18562	chr5B	326505619	326506007	389	326505915	5.19	5.06307	6.85018	3.3933	Promoter (1-2kb)	chr5B	326507221	326508353	1133	1	+	TraesCS5B02G178400	TraesCS5B02G178400.1	-1306
WTTTYCTCYAAGTCC	MEME-3	chr1B	199660057	199660071	-	20.4268	9.42e-08	0.00292	AATTCCACTAAGTCC	65	IP_peak_1659	chr1B	199659884	199660142	259	199659992	7.79	7.18578	9.90484	5.97593	Promoter (1-2kb)	chr1B	199661705	199662115	411	1	+	TraesCS1B02G249300LC	TraesCS1B02G249300LC.1	-1713
WTTTYCTCYAAGTCC	MEME-3	chr6A	560647291	560647305	+	18.9634	2.97e-07	0.00597	TTTTTTTCTAAGTAC	-58	IP_peak_21912	chr6A	560647166	560647488	323	560647363	6.06	6.04984	9.21445	5.3363	Promoter (1-2kb)	chr6A	560649261	560649413	153	1	+	TraesCS6A02G517100LC	TraesCS6A02G517100LC.1	-1898
WTTTYCTCYAAGTCC	MEME-3	chr3D	160621672	160621686	+	18.4268	4.15e-07	0.00777	AATTTTTCCAAGTCT	98	IP_peak_11831	chr3D	160621402	160621743	342	160621574	8.65	6.67599	8.88947	5.14526	Promoter (1-2kb)	chr3D	160612250	160619715	7466	6	-	TraesCS3D02G178700	TraesCS3D02G178700.4	-1859
WTTTYCTCYAAGTCC	MEME-3	chr3D	51796422	51796436	-	16.5244	1.44e-06	0.0221	TATTCCACCAAGTTC	-136	IP_peak_11606	chr3D	51796381	51796606	226	51796572	8.65	4.82684	5.94877	2.69714	Promoter (1-2kb)	chr3D	51798020	51800438	2419	4	+	TraesCS3D02G103300LC	TraesCS3D02G103300LC.1	-1448
WTTTYCTCYAAGTCC	MEME-3	chr3A	471827110	471827124	-	16.5244	1.44e-06	0.0221	ATTTCCCCCAAGTCA	-52	IP_peak_9044	chr3A	471827004	471827348	345	471827176	7.79	7.53345	10.897	6.85299	Promoter (1-2kb)	chr3A	471820238	471825958	5721	6	-	TraesCS3A02G252000	TraesCS3A02G252000.7	-1218
WTTTYCTCYAAGTCC	MEME-3	chr7D	413250058	413250072	+	16.122	1.86e-06	0.0272	TTTTTTTCCAAGTCG	-32	IP_peak_28376	chr7D	413250011	413250257	247	413250104	12.98	8.97604	13.3173	9.11384	Promoter (<=1kb)	chr7D	413245870	413249112	3243	5	-	TraesCS7D02G323600	TraesCS7D02G323600.1	-992
WTTTYCTCYAAGTCC	MEME-3	chr6B	438091582	438091596	-	15.9512	2.07e-06	0.0298	ACTTTTTCCAAGTCC	-57	IP_peak_22804	chr6B	438091506	438091843	338	438091653	13.85	7.84642	11.9958	7.89354	Promoter (1-2kb)	chr6B	438093147	438095722	2576	4	+	TraesCS6B02G245400	TraesCS6B02G245400.1	-1494
WTTTYCTCYAAGTCC	MEME-3	chr1A	558320375	558320389	-	14.8537	3.76e-06	0.0478	TTTTTCTCCATGTTC	-154	IP_peak_1145	chr1A	558320207	558320630	424	558320543	7.79	5.33678	6.36841	2.97687	Promoter (<=1kb)	chr1A	558321455	558322873	1419	1	+	TraesCS1A02G391100	TraesCS1A02G391100.1	-912
WTTTYCTCYAAGTCC	MEME-3	chr5D	210986639	210986653	+	14.7073	4e-06	0.0498	ATATTTTCTAAGTAT	-67	IP_peak_19793	chr5D	210986602	210986847	246	210986720	8.65	7.89335	11.5118	7.43095	Promoter (1-2kb)	chr5D	210987954	210991810	3857	10	+	TraesCS5D02G132500	TraesCS5D02G132500.1	-1234
WTTTYCTCYAAGTCC	MEME-3	chr1A	39637668	39637682	-	14.378	4.7e-06	0.0564	ATACCGGCTAAGTCC	-43	IP_peak_127	chr1A	39637665	39637946	282	39637725	5.19	5.30804	7.58964	3.97097	Promoter (<=1kb)	chr1A	39635757	39637187	1431	1	-	TraesCS1A02G058800	TraesCS1A02G058800.1	-538
WTTTYCTCYAAGTCC	MEME-3	chr5B	344318105	344318119	+	14.3537	4.77e-06	0.057	TTTTTGACCAAGTTT	-95	IP_peak_18597	chr5B	344317934	344318438	505	344318214	8.65	8.27526	12.6304	8.46143	Promoter (<=1kb)	chr5B	344310860	344317618	6759	12	-	TraesCS5B02G190400	TraesCS5B02G190400.1	-596
WTTTYCTCYAAGTCC	MEME-3	chr3B	794849733	794849747	+	14.2683	4.99e-06	0.0587	ATTTTTTCTATGTAC	-27	IP_peak_11294	chr3B	794849285	794849850	566	794849774	8.65	5.10221	6.35342	2.96234	Promoter (1-2kb)	chr3B	794851202	794860744	9543	18	+	TraesCS3B02G561100	TraesCS3B02G561100.1	-1428
WTTTYCTCYAAGTCC	MEME-3	chr6D	41205094	41205108	-	14.0976	5.44e-06	0.0624	ATTTTGGCCAAGTTT	-66	IP_peak_23556	chr6D	41205048	41205333	286	41205174	3.46	3.71569	4.23941	1.39011	Promoter (1-2kb)	chr6D	41207038	41207925	888	1	+	TraesCS6D02G076400	TraesCS6D02G076400.1	-1864
WTTTYCTCYAAGTCC	MEME-3	chr5D	10064671	10064685	-	14.0732	5.52e-06	0.0631	CTTTTTTCTAAGTTC	138	IP_peak_19456	chr5D	10064394	10064689	296	10064533	12.12	6.55758	10.1966	6.23501	Promoter (<=1kb)	chr5D	10065011	10068982	3972	4	+	TraesCS5D02G017600	TraesCS5D02G017600.1	-478
WTTTYCTCYAAGTCC	MEME-3	chr3D	410541242	410541256	-	14.0366	5.63e-06	0.0639	AATTCCCTCAAGTCC	41	IP_peak_12164	chr3D	410541195	410541458	264	410541201	5.19	4.15408	4.89461	1.84722	Promoter (<=1kb)	chr3D	410539529	410540365	837	1	-	TraesCS3D02G389200LC	TraesCS3D02G389200LC.1	-836
WTTTYCTCYAAGTCC	MEME-3	chr3B	16048251	16048265	+	14.0122	5.7e-06	0.0644	TATTTAACCAAGTCT	-61	IP_peak_9864	chr3B	16048163	16048612	450	16048326	8.65	7.61561	10.8166	6.81219	Promoter (<=1kb)	chr3B	16049143	16050606	1464	1	+	TraesCS3B02G033200	TraesCS3B02G033200.1	-817
WTTTYCTCYAAGTCC	MEME-3	chr7D	263531475	263531489	+	13.9878	5.79e-06	0.0652	TTTTCGACCATGTCT	-179	IP_peak_28183	chr7D	263531189	263531734	546	263531668	12.12	6.55758	10.1966	6.23501	Promoter (<=1kb)	chr7D	263522856	263531068	8213	2	-	TraesCS7D02G273000	TraesCS7D02G273000.1	-600
WTTTYCTCYAAGTCC	MEME-3	chr5B	292171971	292171985	-	13.9024	6.01e-06	0.0672	TATTCATCTATGTCC	0	IP_peak_18490	chr5B	292171652	292172302	651	292171982	12.12	5.83185	9.04157	5.28167	Promoter (<=1kb)	chr5B	292170928	292171185	258	1	-	TraesCS5B02G272700LC	TraesCS5B02G272700LC.1	-797
WTTTYCTCYAAGTCC	MEME-3	chr6A	531058085	531058099	+	13.9024	6.01e-06	0.0672	ATTTCCTTCAAGTAC	-69	IP_peak_21839	chr6A	531058057	531058279	223	531058168	3.46	3.82443	4.55152	1.54075	Promoter (<=1kb)	chr6A	531058273	531058703	431	2	+	TraesCS6A02G482200LC	TraesCS6A02G482200LC.1	-105
WTTTYCTCYAAGTCC	MEME-3	chr6D	400726173	400726187	-	13.7683	6.4e-06	0.0708	TTTTTGTCTAAGTTA	-30	IP_peak_24134	chr6D	400725748	400726351	604	400726217	10.38	5.69221	7.99793	4.33317	Promoter (<=1kb)	chr6D	400717252	400725447	8196	10	-	TraesCS6D02G290200	TraesCS6D02G290200.5	-770
WTTTYCTCYAAGTCC	MEME-3	chr5A	311123451	311123465	-	13.6951	6.63e-06	0.0726	TATTTCACCATGTCT	43	IP_peak_17030	chr5A	311123286	311123540	255	311123408	6.92	6.72341	9.01018	5.25107	Promoter (<=1kb)	chr5A	311124231	311126740	2510	3	+	TraesCS5A02G138900	TraesCS5A02G138900.1	-823
WTTTYCTCYAAGTCC	MEME-3	chr7A	580466363	580466377	+	13.6829	6.66e-06	0.0726	TTTTTTGCCATGTCT	-54	IP_peak_25615	chr7A	580466238	580466470	233	580466431	8.65	4.56423	5.56755	2.38831	Promoter (1-2kb)	chr7A	580468391	580472560	4170	5	+	TraesCS7A02G400200	TraesCS7A02G400200.1	-1960
WTTTYCTCYAAGTCC	MEME-3	chr6D	69246439	69246453	+	13.6707	6.7e-06	0.0726	AATTTTGACAAGTCC	-22	IP_peak_23628	chr6D	69246257	69246599	343	69246475	8.65	5.78396	7.39136	3.87996	Promoter (1-2kb)	chr6D	69248022	69248453	432	1	+	TraesCS6D02G122700LC	TraesCS6D02G122700LC.1	-1547
WTTTYCTCYAAGTCC	MEME-3	chr3D	151074013	151074027	+	13.4024	7.53e-06	0.0765	TTTTTTTATAAGTTC	1	IP_peak_11811	chr3D	151073568	151074065	498	151074012	6.92	5.16074	5.80523	2.60873	Promoter (1-2kb)	chr3D	151075863	151076171	309	1	+	TraesCS3D02G205100LC	TraesCS3D02G205100LC.1	-1851
WTTTYCTCYAAGTCC	MEME-3	chr4A	35510396	35510410	+	13.3171	7.78e-06	0.0778	TTTTCTTACAAGTTC	-16	IP_peak_12811	chr4A	35510272	35510605	334	35510426	7.79	7.53345	10.897	6.85299	Promoter (1-2kb)	chr4A	35511749	35517233	5485	7	+	TraesCS4A02G039300LC	TraesCS4A02G039300LC.1	-1323
WTTTYCTCYAAGTCC	MEME-3	chr5A	585442267	585442281	-	13.1707	8.32e-06	0.0814	TTTTTTTCAAAGTTC	131	IP_peak_17654	chr5A	585441935	585442522	588	585442136	13.85	6.34958	9.71042	5.80193	Promoter (1-2kb)	chr5A	585439556	585440639	1084	2	-	TraesCS5A02G389900	TraesCS5A02G389900.1	-1497
WTTTYCTCYAAGTCC	MEME-3	chr7D	500097324	500097338	-	13.122	8.53e-06	0.0822	AATTTTGCTAAGTTT	-80	IP_peak_28564	chr7D	500097237	500097511	275	500097418	9.52	5.25952	6.95302	3.47631	Promoter (<=1kb)	chr7D	500098352	500101370	3019	9	+	TraesCS7D02G385700	TraesCS7D02G385700.1	-934
WTTTYCTCYAAGTCC	MEME-3	chr3B	766182978	766182992	-	13.122	8.53e-06	0.0822	GATTTTTCCAAGTAC	-23	IP_peak_11201	chr3B	766182883	766183175	293	766183015	14.71	5.23709	8.41215	4.70692	Promoter (1-2kb)	chr3B	766180748	766181089	342	1	-	TraesCS3B02G773200LC	TraesCS3B02G773200LC.1	-1926
WTTTYCTCYAAGTCC	MEME-3	chr6D	389371817	389371831	-	13.061	8.75e-06	0.0835	ATATTTCCCAAGTCA	84	IP_peak_24107	chr6D	389371498	389371853	356	389371733	10.38	3.79481	5.08049	1.98909	Promoter (1-2kb)	chr6D	389369224	389370171	948	1	-	TraesCS6D02G387800LC	TraesCS6D02G387800LC.1	-1562
WTTTYCTCYAAGTCC	MEME-3	chr5A	680104039	680104053	+	13.0122	8.94e-06	0.0849	ACTTTTTCTAAGTAC	50	IP_peak_17907	chr5A	680103919	680104170	252	680103989	8.65	4.56423	5.56755	2.38831	Promoter (1-2kb)	chr5A	680105615	680106142	528	2	+	TraesCS5A02G516700	TraesCS5A02G516700.1	-1626
WTTTYCTCYAAGTCC	MEME-3	chr3B	117546707	117546721	-	13	8.98e-06	0.0852	ATATTGACTAAGTAT	174	IP_peak_10130	chr3B	117546459	117546797	339	117546533	7.79	4.93572	5.76627	2.5738	Promoter (<=1kb)	chr3B	117547204	117550097	2894	3	+	TraesCS3B02G180500LC	TraesCS3B02G180500LC.1	-671
WTTTYCTCYAAGTCC	MEME-3	chr5D	424074696	424074710	+	12.878	9.53e-06	0.0884	AATTTGACCAAGTTT	-195	IP_peak_20248	chr5D	424074612	424075032	421	424074905	4.33	4.3555	5.41801	2.24976	Promoter (1-2kb)	chr5D	424075949	424077961	2013	3	+	TraesCS5D02G417000LC	TraesCS5D02G417000LC.1	-1044
WTTTYCTCYAAGTCC	MEME-3	chr3B	787888330	787888344	+	12.7805	9.96e-06	0.091	CTTTTGTCAAAGTCC	140	IP_peak_11266	chr3B	787888111	787888395	285	787888190	11.25	6.47431	9.63232	5.72609	Promoter (1-2kb)	chr3B	787889744	787891127	1384	1	+	TraesCS3B02G553300	TraesCS3B02G553300.1	-1554
WTTTYCTCYAAGTCC	MEME-3	chr1D	114105292	114105306	+	12.6829	1.04e-05	0.0936	ATATTGACCAAGTAT	165	IP_peak_2853	chr1D	114105084	114105353	270	114105127	12.98	4.64912	6.66605	3.24411	Promoter (1-2kb)	chr1D	114107027	114107254	228	1	+	TraesCS1D02G161500LC	TraesCS1D02G161500LC.1	-1900
WTTTYCTCYAAGTCC	MEME-3	chr7A	474300079	474300093	+	12.6341	1.06e-05	0.0946	TTTTTCTATAAGTTT	10	IP_peak_25358	chr7A	474300016	474300239	224	474300069	7.79	6.07755	7.58236	3.97097	Promoter (1-2kb)	chr7A	474295765	474299062	3298	5	-	TraesCS7A02G326400	TraesCS7A02G326400.1	-1007
WTTTYCTCYAAGTCC	MEME-3	chr4A	38736861	38736875	-	12.6341	1.06e-05	0.0946	TTTTTCTATAAGTTT	-97	IP_peak_12822	chr4A	38736861	38737108	248	38736972	8.65	6.88847	9.28392	5.40077	Promoter (<=1kb)	chr4A	38737443	38738684	1242	2	+	TraesCS4A02G044400LC	TraesCS4A02G044400LC.1	-471
WTTTYCTCYAAGTCC	MEME-3	chr2A	695176326	695176340	+	12.6098	1.08e-05	0.0952	TTTTCTCCTAAGTAA	-18	IP_peak_4913	chr2A	695176173	695176501	329	695176358	3.46	3.82443	4.55152	1.54075	Promoter (1-2kb)	chr2A	695174747	695174899	153	1	-	TraesCS2A02G604600LC	TraesCS2A02G604600LC.1	-1459
WTTTYCTCYAAGTCC	MEME-3	chr1A	32084049	32084063	-	12.5732	1.09e-05	0.0959	TTTTTTTCAATGTCC	-26	IP_peak_107	chr1A	32083945	32084242	298	32084089	7.79	5.89569	7.26834	3.77083	Promoter (<=1kb)	chr1A	32084707	32089178	4472	9	+	TraesCS1A02G050100	TraesCS1A02G050100.1	-618
WTTTYCTCYAAGTCC	MEME-3	chr2B	478891743	478891757	-	12.5488	1.11e-05	0.0965	TTTTGTTCTAAGTCA	230	IP_peak_6181	chr2B	478891422	478891954	533	478891513	6.06	6.04984	9.21445	5.3363	Promoter (<=1kb)	chr2B	478892333	478897182	4850	9	+	TraesCS2B02G335200	TraesCS2B02G335200.2	-820
WTTTYCTCYAAGTCC	MEME-3	chr6B	6170789	6170803	+	12.5	1.13e-05	0.0982	TTTCCTTCTAAGTTT	-17	IP_peak_22075	chr6B	6170695	6170931	237	6170820	5.19	5.30804	7.58964	3.97097	Promoter (1-2kb)	chr6B	6166197	6168942	2746	4	-	TraesCS6B02G010000	TraesCS6B02G010000.1	-1878
WTTTYCTCYAAGTCC	MEME-3	chr6A	575239460	575239474	-	12.439	1.16e-05	0.0999	ATTTTTTTCAAGTAC	-16	IP_peak_21939	chr6A	575239237	575239866	630	575239490	10.38	9.66081	15.9065	11.5802	Promoter (<=1kb)	chr6A	575240076	575241378	1303	3	+	TraesCS6A02G342700	TraesCS6A02G342700.1	-586
WTTTYCTCYAAGTCC	MEME-3	chrUn	12283051	12283065	-	12.3659	1.2e-05	0.102	AGTTTTCCTAAGTCT	86	IP_peak_29022	chrUn	12282840	12283076	237	12282965	10.38	5.69221	7.99793	4.33317	Promoter (1-2kb)	chrUn	12277401	12281683	4283	5	-	TraesCSU02G008400	TraesCSU02G008400.1	-1282
WTTTYCTCYAAGTCC	MEME-3	chr1D	476226027	476226041	+	12.3171	1.23e-05	0.103	ATTTTAAATAAGTCC	0	IP_peak_3515	chr1D	476225890	476226185	296	476226030	11.25	5.79166	8.55828	4.84154	Promoter (<=1kb)	chr1D	476226904	476231089	4186	9	+	TraesCS1D02G419100	TraesCS1D02G419100.1	-874
WTTTYCTCYAAGTCC	MEME-3	chr1A	572002046	572002060	+	12.3171	1.23e-05	0.103	ATTTTAAATAAGTCC	-162	IP_peak_1198	chr1A	572001963	572002266	304	572002222	10.38	5.69221	7.99793	4.33317	Promoter (1-2kb)	chr1A	572003951	572015140	11190	9	+	TraesCS1A02G411300	TraesCS1A02G411300.1	-1729
WTTTYCTCYAAGTCC	MEME-3	chr2B	547040231	547040245	+	12.2683	1.26e-05	0.104	ATTTTTTCTATGTAT	-81	IP_peak_6289	chr2B	547040194	547040585	392	547040326	10.38	3.79481	5.08049	1.98909	Promoter (<=1kb)	chr2B	547040770	547041234	465	1	+	TraesCS2B02G383400	TraesCS2B02G383400.1	-444
WTTTYCTCYAAGTCC	MEME-3	chr2D	139031112	139031126	+	12.2439	1.28e-05	0.104	AGTTTGACCAAGTCT	0	IP_peak_7274	chr2D	139031037	139031274	238	139031122	6.92	6.79165	9.21445	5.3363	Promoter (<=1kb)	chr2D	139031978	139032313	336	1	+	TraesCS2D02G209600LC	TraesCS2D02G209600LC.1	-856
WTTTYCTCYAAGTCC	MEME-3	chr7D	534524465	534524479	+	12.2439	1.28e-05	0.104	TTTTTTTACAAGTCA	0	IP_peak_28630	chr7D	534524301	534524549	249	534524479	6.06	5.98906	9.01018	5.25107	Promoter (<=1kb)	chr7D	534519871	534524247	4377	2	-	TraesCS7D02G415700	TraesCS7D02G415700.1	-232
WTTTYCTCYAAGTCC	MEME-3	chr3A	547481955	547481969	+	12.2439	1.28e-05	0.104	AGTTTGGCCAAGTCT	40	IP_peak_9197	chr3A	547481852	547482168	317	547481915	6.92	5.4791	6.32584	2.93935	Promoter (1-2kb)	chr3A	547477728	547480537	2810	3	-	TraesCS3A02G309700	TraesCS3A02G309700.1	-1378
WTTTYCTCYAAGTCC	MEME-3	chr3B	90936264	90936278	+	12.1829	1.31e-05	0.105	TTTTTGTTCAAGTTC	-99	IP_peak_10078	chr3B	90936166	90936528	363	90936377	7.79	5.41005	6.48178	3.07661	Promoter (<=1kb)	chr3B	90937223	90938410	1188	1	+	TraesCS3B02G120800	TraesCS3B02G120800.1	-846
WTTTYCTCYAAGTCC	MEME-3	chr5A	46588365	46588379	+	12.1707	1.32e-05	0.105	TTTTCTTCTATGTTT	145	IP_peak_16626	chr5A	46588153	46588420	268	46588220	9.52	8.29828	12.3902	8.26802	Promoter (<=1kb)	chr5A	46571720	46588091	16372	11	-	TraesCS5A02G051400	TraesCS5A02G051400.2	-129
WTTTYCTCYAAGTCC	MEME-3	chr5A	139485175	139485189	+	12.1707	1.32e-05	0.105	TTTTCTTCTATGTTT	-89	IP_peak_16784	chr5A	139485120	139485526	407	139485278	10.38	6.82092	9.78691	5.87046	Promoter (<=1kb)	chr5A	139484120	139484798	679	3	-	TraesCS5A02G098000	TraesCS5A02G098000.2	-480
WTTTYCTCYAAGTCC	MEME-3	chr6B	475818562	475818576	+	12.1707	1.32e-05	0.105	ATTTTTTTTAAGTTC	144	IP_peak_22858	chr6B	475818388	475818677	290	475818418	7.79	4.64484	5.34496	2.20598	Promoter (<=1kb)	chr6B	475816010	475817830	1821	3	-	TraesCS6B02G264300	TraesCS6B02G264300.1	-588
WTTTYCTCYAAGTCC	MEME-3	chr5D	29502141	29502155	-	12.1707	1.32e-05	0.105	ATTTTTTTTAAGTTC	138	IP_peak_19504	chr5D	29501895	29502155	261	29502003	9.52	6.65831	9.15511	5.3363	Promoter (1-2kb)	chr5D	29503027	29505780	2754	2	+	TraesCS5D02G032100	TraesCS5D02G032100.1	-1024
WTTTYCTCYAAGTCC	MEME-3	chr2D	50042995	50043009	+	12.1341	1.34e-05	0.106	CTTTTTTCTAAGTCG	84	IP_peak_7059	chr2D	50042758	50043017	260	50042911	12.98	5.45879	7.90674	4.26402	Promoter (1-2kb)	chr2D	50044738	50046786	2049	2	+	TraesCS2D02G106300LC	TraesCS2D02G106300LC.1	-1827
WTTTYCTCYAAGTCC	MEME-3	chr1B	563999547	563999561	+	12.0488	1.39e-05	0.108	TTTTCTTCTACGTTT	175	IP_peak_2259	chr1B	563999336	563999567	232	563999372	7.79	5.26548	6.25917	2.90391	Promoter (1-2kb)	chr1B	563996095	563997859	1765	2	-	TraesCS1B02G336900	TraesCS1B02G336900.1	-1513
WTTTYCTCYAAGTCC	MEME-3	chr1B	61529461	61529475	-	12.0366	1.4e-05	0.109	TTTTTTTAAAAGTCC	-80	IP_peak_1438	chr1B	61529278	61529603	326	61529555	6.06	6.04984	9.21445	5.3363	Promoter (<=1kb)	chr1B	61523932	61528965	5034	10	-	TraesCS1B02G078600	TraesCS1B02G078600.1	-590
WTTTYCTCYAAGTCC	MEME-3	chr7A	32773291	32773305	-	12.0244	1.41e-05	0.109	ATATTTTCTAAGTAA	-14	IP_peak_24495	chr7A	32773221	32773744	524	32773319	7.79	7.53345	10.897	6.85299	Promoter (<=1kb)	chr7A	32774272	32779896	5625	13	+	TraesCS7A02G065800	TraesCS7A02G065800.1	-953
WTTTYCTCYAAGTCC	MEME-3	chr7A	168811656	168811670	+	11.9756	1.44e-05	0.109	ATTTGTTCCAAGTCA	-65	IP_peak_24869	chr7A	168811627	168811887	261	168811735	11.25	6.12489	9.08008	5.30512	Promoter (<=1kb)	chr7A	168812422	168813720	1299	1	+	TraesCS7A02G206200	TraesCS7A02G206200.1	-687
WTTTYCTCYAAGTCC	MEME-3	chr3B	18002261	18002275	-	11.9634	1.45e-05	0.109	ATTTCTTATAAGTAT	-203	IP_peak_9876	chr3B	18002131	18002625	495	18002478	9.52	9.01706	14.4095	10.138	Promoter (<=1kb)	chr3B	18003232	18004507	1276	6	+	TraesCS3B02G042900LC	TraesCS3B02G042900LC.1	-754
WTTTYCTCYAAGTCC	MEME-3	chr3D	484813424	484813438	-	11.9146	1.48e-05	0.11	AAATTGCCCAAGTCA	215	IP_peak_12311	chr3D	484813131	484813457	327	484813209	5.19	4.64002	5.83493	2.6339	Promoter (1-2kb)	chr3D	484809391	484811412	2022	3	-	TraesCS3D02G371500	TraesCS3D02G371500.1	-1797
WTTTYCTCYAAGTCC	MEME-3	chr6D	376893923	376893937	+	11.8902	1.5e-05	0.111	TTTTCCACCATGTAT	-133	IP_peak_24083	chr6D	376893675	376894158	484	376894070	6.92	5.4791	6.32584	2.93935	Promoter (1-2kb)	chr6D	376895145	376895864	720	1	+	TraesCS6D02G375100LC	TraesCS6D02G375100LC.1	-1075
WTTTYCTCYAAGTCC	MEME-3	chr5D	281497089	281497103	+	11.878	1.51e-05	0.112	TTTTTCGTTAAGTTC	-72	IP_peak_19901	chr5D	281497051	281497360	310	281497175	6.06	6.04984	9.21445	5.3363	Promoter (1-2kb)	chr5D	281495189	281495527	339	1	-	TraesCS5D02G252000LC	TraesCS5D02G252000LC.1	-1648
WTTTYCTCYAAGTCC	MEME-3	chr5D	22794251	22794265	+	11.8537	1.52e-05	0.112	ATTTTTTTCAAGTTC	-125	IP_peak_19480	chr5D	22794221	22794457	237	22794390	8.65	5.10221	6.35342	2.96234	Promoter (1-2kb)	chr5D	22796109	22797959	1851	1	+	TraesCS5D02G025400	TraesCS5D02G025400.1	-1719
WTTTYCTCYAAGTCC	MEME-3	chr1A	340429127	340429141	+	11.8537	1.52e-05	0.112	TTTTTCCCTATGTAT	-22	IP_peak_645	chr1A	340429013	340429274	262	340429163	8.65	8.27526	12.6304	8.46143	Promoter (<=1kb)	chr1A	340426625	340428765	2141	6	-	TraesCS1A02G188600	TraesCS1A02G188600.2	-398
WTTTYCTCYAAGTCC	MEME-3	chr3B	796459846	796459860	-	11.8537	1.52e-05	0.112	TTATCTTCCATGTTC	112	IP_peak_11299	chr3B	796459652	796459913	262	796459734	6.06	4.73462	6.05293	2.71147	Promoter (<=1kb)	chr3B	796460605	796466160	5556	7	+	TraesCS3B02G563400	TraesCS3B02G563400.4	-871
WTTTYCTCYAAGTCC	MEME-3	chr6D	431468893	431468907	-	11.8049	1.55e-05	0.113	ATTTTGTATAAGTAT	31	IP_peak_24222	chr6D	431468703	431468937	235	431468862	11.25	5.23923	7.69686	4.07175	Promoter (<=1kb)	chr6D	431469741	431470859	1119	1	+	TraesCS6D02G436600LC	TraesCS6D02G436600LC.1	-879
WTTTYCTCYAAGTCC	MEME-3	chr4B	30497647	30497661	-	11.7927	1.56e-05	0.113	TTTTTTCCTAAGTTA	0	IP_peak_14390	chr4B	30497373	30497863	491	30497648	6.06	6.04984	9.21445	5.3363	Promoter (1-2kb)	chr4B	30498971	30504757	5787	2	+	TraesCS4B02G042800	TraesCS4B02G042800.1	-1323
WTTTYCTCYAAGTCC	MEME-3	chr1A	13271749	13271763	-	11.7805	1.57e-05	0.114	ATTTTATACAAGTCT	55	IP_peak_45	chr1A	13271566	13271797	232	13271694	7.79	7.18578	9.90484	5.97593	Promoter (<=1kb)	chr1A	13272070	13273683	1614	3	+	TraesCS1A02G028000	TraesCS1A02G028000.1	-376
WTTTYCTCYAAGTCC	MEME-3	chr6D	100764226	100764240	-	11.7805	1.57e-05	0.114	TTTTTCACAAAGTCA	24	IP_peak_23685	chr6D	100764038	100764398	361	100764202	16.44	8.60964	14.7826	10.4967	Promoter (1-2kb)	chr6D	100762363	100763160	798	1	-	TraesCS6D02G164200LC	TraesCS6D02G164200LC.1	-1042
WTTTYCTCYAAGTCC	MEME-3	chr7B	70538014	70538028	+	11.7683	1.58e-05	0.114	TTTTTTCACAAGTAC	73	IP_peak_26229	chr7B	70537796	70538068	273	70537941	8.65	7.61561	10.8166	6.81219	Promoter (1-2kb)	chr7B	70535938	70536417	480	1	-	TraesCS7B02G109600LC	TraesCS7B02G109600LC.1	-1524
WTTTYCTCYAAGTCC	MEME-3	chr2B	128378231	128378245	+	11.7683	1.58e-05	0.114	AATTTGTCAAAGTTC	64	IP_peak_5554	chr2B	128378086	128378332	247	128378167	5.19	5.30804	7.58964	3.97097	Promoter (<=1kb)	chr2B	128375205	128377343	2139	4	-	TraesCS2B02G215400LC	TraesCS2B02G215400LC.1	-824
WTTTYCTCYAAGTCC	MEME-3	chr4D	473832567	473832581	+	11.7683	1.58e-05	0.114	TTTTTTCACAAGTAC	0	IP_peak_16337	chr4D	473832328	473832761	434	473832569	10.38	7.41542	10.7999	6.79871	Promoter (1-2kb)	chr4D	473834195	473839286	5092	5	+	TraesCS4D02G305400	TraesCS4D02G305400.1	-1626
WTTTYCTCYAAGTCC	MEME-3	chr3D	581991064	581991078	-	11.6951	1.63e-05	0.115	AATTTTTCAAAGTTC	65	IP_peak_12552	chr3D	581990953	581991364	412	581990999	9.52	4.49899	5.82037	2.62029	Promoter (1-2kb)	chr3D	581985343	581989533	4191	2	-	TraesCS3D02G485200	TraesCS3D02G485200.1	-1466
WTTTYCTCYAAGTCC	MEME-3	chr2D	106972798	106972812	-	11.6463	1.67e-05	0.115	CTTTTTTTCAAGTCC	210	IP_peak_7189	chr2D	106972529	106972814	286	106972588	7.79	6.07755	7.58236	3.97097	Promoter (1-2kb)	chr2D	106970663	106971515	853	1	-	TraesCS2D02G162600	TraesCS2D02G162600.1	-1073
WTTTYCTCYAAGTCC	MEME-3	chr6D	394931620	394931634	+	11.622	1.69e-05	0.115	TTTTCTGCAAAGTTC	-151	IP_peak_24120	chr6D	394931545	394931857	313	394931785	11.25	4.39988	6.37473	2.98197	Promoter (1-2kb)	chr6D	394933332	394937081	3750	10	+	TraesCS6D02G286500	TraesCS6D02G286500.1	-1547
WTTTYCTCYAAGTCC	MEME-3	chr4B	641272514	641272528	+	11.622	1.69e-05	0.115	TTTTCTACAAAGTTC	-126	IP_peak_15452	chr4B	641272466	641272756	291	641272654	8.65	4.56423	5.56755	2.38831	Promoter (1-2kb)	chr4B	641269842	641271433	1592	3	-	TraesCS4B02G347400	TraesCS4B02G347400.1	-1221
WTTTYCTCYAAGTCC	MEME-3	chr1A	281648761	281648775	-	11.5	1.77e-05	0.117	TTTTTTTCCACGTTT	52	IP_peak_535	chr1A	281648603	281648878	276	281648709	6.06	5.56759	7.81133	4.17224	Promoter (1-2kb)	chr1A	281650040	281650769	730	1	+	TraesCS1A02G158200	TraesCS1A02G158200.1	-1331
WTTTYCTCYAAGTCC	MEME-3	chr6D	411770254	411770268	-	11.4756	1.79e-05	0.117	TATTTTTTCAAGTAC	164	IP_peak_24149	chr6D	411770041	411770488	448	411770090	12.98	5.97947	8.68779	4.96	Promoter (<=1kb)	chr6D	411767774	411769316	1543	5	-	TraesCS6D02G302900	TraesCS6D02G302900.1	-774
WTTTYCTCYAAGTCC	MEME-3	chr2D	478878831	478878845	+	11.4634	1.8e-05	0.118	ATTTTCTTTAAGTCG	6	IP_peak_7818	chr2D	478878556	478878926	371	478878825	8.65	6.67599	8.88947	5.14526	Promoter (1-2kb)	chr2D	478873485	478877543	4059	3	-	TraesCS2D02G375200	TraesCS2D02G375200.1	-1282
WTTTYCTCYAAGTCC	MEME-3	chr1A	463819730	463819744	-	11.4146	1.84e-05	0.119	AAATACTCTAAGTAT	-47	IP_peak_877	chr1A	463819632	463819995	364	463819791	7.79	5.41005	6.48178	3.07661	Promoter (<=1kb)	chr1A	463820155	463827474	7320	12	+	TraesCS1A02G269100	TraesCS1A02G269100.1	-364
WTTTYCTCYAAGTCC	MEME-3	chr4A	605639222	605639236	-	11.3902	1.86e-05	0.12	TTTTTTACAAAGTTC	53	IP_peak_13929	chr4A	605638962	605639293	332	605639169	12.98	7.75466	11.3571	7.28604	Promoter (1-2kb)	chr4A	605640606	605646721	6116	10	+	TraesCS4A02G315200	TraesCS4A02G315200.1	-1437
WTTTYCTCYAAGTCC	MEME-3	chr3B	804140944	804140958	-	11.3659	1.88e-05	0.12	ATTTTTAATAAGTTC	-16	IP_peak_11315	chr3B	804140601	804141068	468	804140974	7.79	4.39416	4.98931	1.91819	Promoter (1-2kb)	chr3B	804134411	804139191	4781	3	-	TraesCS3B02G851800LC	TraesCS3B02G851800LC.2	-1783
WTTTYCTCYAAGTCC	MEME-3	chr3A	704764669	704764683	+	11.3293	1.91e-05	0.121	ATTTTTTTTAAGTCA	-108	IP_peak_9633	chr3A	704764548	704764806	259	704764791	7.79	5.26548	6.25917	2.90391	Promoter (1-2kb)	chr3A	704766283	704769027	2745	1	+	TraesCS3A02G473700	TraesCS3A02G473700.1	-1492
WTTTYCTCYAAGTCC	MEME-3	chr7D	577256136	577256150	+	11.2805	1.95e-05	0.123	ATATTGAATAAGTCT	-191	IP_peak_28765	chr7D	577255875	577256599	725	577256341	8.65	7.89335	11.5118	7.43095	Promoter (1-2kb)	chr7D	577257760	577260702	2943	5	+	TraesCS7D02G460700	TraesCS7D02G460700.1	-1419
WTTTYCTCYAAGTCC	MEME-3	chr5B	622627193	622627207	+	11.2317	1.99e-05	0.124	ATTTTCAAAAAGTCC	-93	IP_peak_19182	chr5B	622627142	622627394	253	622627300	8.65	5.78396	7.39136	3.87996	Promoter (1-2kb)	chr5B	622628358	622630953	2596	7	+	TraesCS5B02G451200	TraesCS5B02G451200.1	-1058
WTTTYCTCYAAGTCC	MEME-3	chr4D	465967606	465967620	-	11.2317	1.99e-05	0.124	TTTTTTTCAAAGTCG	0	IP_peak_16308	chr4D	465967560	465967818	259	465967606	6.06	4.73462	6.05293	2.71147	Promoter (1-2kb)	chr4D	465969271	465971993	2723	2	+	TraesCS4D02G296800	TraesCS4D02G296800.1	-1665
WTTTYCTCYAAGTCC	MEME-3	chr4B	25014234	25014248	+	11.2073	2.01e-05	0.125	TTTTTCGCAAAGTAT	167	IP_peak_14376	chr4B	25014038	25014262	225	25014067	6.06	4.88066	6.32584	2.93935	Promoter (<=1kb)	chr4B	25014854	25015081	228	1	+	TraesCS4B02G039300LC	TraesCS4B02G039300LC.1	-787
WTTTYCTCYAAGTCC	MEME-3	chr5B	82453733	82453747	-	11.1585	2.05e-05	0.126	TTCTTTTCCAAGTTT	71	IP_peak_18177	chr5B	82453543	82453844	302	82453662	5.19	4.88492	6.39162	2.99006	Promoter (<=1kb)	chr5B	82454406	82462758	8353	13	+	TraesCS5B02G071300	TraesCS5B02G071300.1	-744
WTTTYCTCYAAGTCC	MEME-3	chr5D	40672267	40672281	-	11.1463	2.06e-05	0.126	ATTTTTTATAAGTTT	103	IP_peak_19539	chr5D	40672026	40672314	289	40672164	7.79	6.47712	8.32336	4.64676	Promoter (1-2kb)	chr5D	40673918	40674336	419	2	+	TraesCS5D02G061600LC	TraesCS5D02G061600LC.1	-1754
WTTTYCTCYAAGTCC	MEME-3	chr5D	525979662	525979676	-	11.122	2.08e-05	0.127	ATTTTGAACAAGTTC	86	IP_peak_20551	chr5D	525979435	525979829	395	525979576	12.98	6.99026	10.1966	6.23501	Promoter (1-2kb)	chr5D	525973630	525978011	4382	3	-	TraesCS5D02G493100	TraesCS5D02G493100.1	-1565
WTTTYCTCYAAGTCC	MEME-3	chr4A	698291159	698291173	+	11.1098	2.1e-05	0.127	TTTTCGTATATGTCT	-6	IP_peak_14166	chr4A	698291020	698291313	294	698291179	10.38	8.98096	14.0049	9.78063	Promoter (1-2kb)	chr4A	698292604	698292807	204	1	+	TraesCS4A02G632200LC	TraesCS4A02G632200LC.1	-1425
WTTTYCTCYAAGTCC	MEME-3	chr7D	17180988	17181002	-	11.0854	2.12e-05	0.128	ATTTTCTTCAAGTTT	-79	IP_peak_27632	chr7D	17180854	17181288	435	17181081	11.25	4.08326	5.86499	2.65755	Promoter (1-2kb)	chr7D	17182425	17183434	1010	2	+	TraesCS7D02G042200LC	TraesCS7D02G042200LC.1	-1344
WTTTYCTCYAAGTCC	MEME-3	chr6D	36770603	36770617	-	11.0244	2.17e-05	0.13	AATTTGACCATGTAC	0	IP_peak_23549	chr6D	36770474	36771058	585	36770613	10.38	5.69221	7.99793	4.33317	Promoter (<=1kb)	chr6D	36771335	36776905	5571	11	+	TraesCS6D02G072200	TraesCS6D02G072200.1	-722
WTTTYCTCYAAGTCC	MEME-3	chr1A	491304211	491304225	-	11.0122	2.18e-05	0.13	ACATTTTCTAAGTAC	35	IP_peak_944	chr1A	491303687	491304270	584	491304176	6.06	6.04984	9.21445	5.3363	Promoter (<=1kb)	chr1A	491304844	491305935	1092	1	+	TraesCS1A02G438800LC	TraesCS1A02G438800LC.1	-668
WTTTYCTCYAAGTCC	MEME-3	chr6A	33951248	33951262	-	11	2.19e-05	0.13	TTTTTTGCCATGTCA	118	IP_peak_20802	chr6A	33951081	33951320	240	33951130	6.92	5.4791	6.32584	2.93935	Promoter (1-2kb)	chr6A	33952629	33953613	985	2	+	TraesCS6A02G063200	TraesCS6A02G063200.1	-1499
WTTTYCTCYAAGTCC	MEME-3	chr7D	546240166	546240180	-	10.9878	2.21e-05	0.131	TTTTCGTATACGTCT	48	IP_peak_28656	chr7D	546240012	546240245	234	546240118	12.12	6.2008	9.62777	5.72452	Promoter (1-2kb)	chr7D	546241318	546241858	541	2	+	TraesCS7D02G426200	TraesCS7D02G426200.1	-1200
WTTTYCTCYAAGTCC	MEME-3	chr3A	57028004	57028018	-	10.9512	2.24e-05	0.131	TCATTTTCCAAGTAC	20	IP_peak_8347	chr3A	57027874	57028159	286	57027984	7.79	4.39416	4.98931	1.91819	Promoter (1-2kb)	chr3A	57017091	57026980	9890	10	-	TraesCS3A02G088900	TraesCS3A02G088900.1	-1004
WTTTYCTCYAAGTCC	MEME-3	chr5B	326867228	326867242	-	10.939	2.25e-05	0.131	GTATCATCCAAGTCT	15	IP_peak_18564	chr5B	326867075	326867318	244	326867213	6.92	6.25026	7.81133	4.17224	Promoter (<=1kb)	chr5B	326865429	326866522	1094	1	-	TraesCS5B02G178800	TraesCS5B02G178800.1	-691
WTTTYCTCYAAGTCC	MEME-3	chr2B	374202958	374202972	+	10.9146	2.27e-05	0.132	TATTATGCCAAGTCA	-118	IP_peak_5997	chr2B	374202649	374203127	479	374203090	4.33	4.3555	5.41801	2.24976	Promoter (1-2kb)	chr2B	374204475	374220926	16452	4	+	TraesCS2B02G272800	TraesCS2B02G272800.1	-1385
WTTTYCTCYAAGTCC	MEME-3	chr2A	504872	504886	-	10.8902	2.3e-05	0.133	TATTTTTTCAAGTTC	132	IP_peak_3589	chr2A	504594	505065	472	504740	8.65	4.82684	5.94877	2.69714	Promoter (1-2kb)	chr2A	502739	502888	150	1	-	TraesCS2A02G000800LC	TraesCS2A02G000800LC.1	-1852
WTTTYCTCYAAGTCC	MEME-3	chr2A	223725359	223725373	-	10.7927	2.39e-05	0.135	AATTCTGCTACGTTC	90	IP_peak_4111	chr2A	223725147	223725400	254	223725269	6.06	5.20154	6.97051	3.48617	Promoter (1-2kb)	chr2A	223715437	223723691	8255	14	-	TraesCS2A02G224300	TraesCS2A02G224300.1	-1578
WTTTYCTCYAAGTCC	MEME-3	chr5B	253426333	253426347	-	10.7927	2.39e-05	0.135	TTTTTTTCTAAATCC	7	IP_peak_18434	chr5B	253426285	253426532	248	253426326	11.25	4.08326	5.86499	2.65755	Promoter (1-2kb)	chr5B	253423840	253425112	1273	4	-	TraesCS5B02G238300LC	TraesCS5B02G238300LC.2	-1214
WTTTYCTCYAAGTCC	MEME-3	chr7A	679005102	679005116	-	10.7683	2.42e-05	0.135	TTTTTGTTCAAGTAT	103	IP_peak_25868	chr7A	679004942	679005165	224	679004999	11.25	4.78301	6.98213	3.4955	Promoter (<=1kb)	chr7A	679003960	679004265	306	1	-	TraesCS7A02G488700	TraesCS7A02G488700.1	-734
WTTTYCTCYAAGTCC	MEME-3	chr3A	495257837	495257851	-	10.7561	2.43e-05	0.135	ATATTTTTTAAGTAC	37	IP_peak_9098	chr3A	495257633	495257861	229	495257800	10.38	4.86911	6.74011	3.30472	Promoter (<=1kb)	chr3A	495251709	495256881	5173	8	-	TraesCS3A02G269200	TraesCS3A02G269200.1	-919
WTTTYCTCYAAGTCC	MEME-3	chr3B	240410467	240410481	+	10.7439	2.44e-05	0.135	TTTTCATATAAGTTC	5	IP_peak_10354	chr3B	240410374	240410608	235	240410462	11.25	4.08326	5.86499	2.65755	Promoter (1-2kb)	chr3B	240412124	240412438	315	1	+	TraesCS3B02G286400LC	TraesCS3B02G286400LC.1	-1662
WTTTYCTCYAAGTCC	MEME-3	chr5A	631974271	631974285	+	10.7439	2.44e-05	0.135	TTTTTTACTATGTAT	113	IP_peak_17768	chr5A	631973997	631974293	297	631974158	8.65	6.19804	8.06066	4.39418	Promoter (<=1kb)	chr5A	631974525	631974782	258	1	+	TraesCS5A02G610400LC	TraesCS5A02G610400LC.1	-367
WTTTYCTCYAAGTCC	MEME-3	chr5A	698642342	698642356	+	10.6951	2.49e-05	0.136	AATTCTTCTATGTTT	-4	IP_peak_17956	chr5A	698641943	698642397	455	698642360	5.19	4.28221	5.12651	2.0135	Promoter (1-2kb)	chr5A	698637655	698640886	3232	11	-	TraesCS5A02G722300LC	TraesCS5A02G722300LC.1	-1474
WTTTYCTCYAAGTCC	MEME-3	chr2B	47457532	47457546	-	10.6463	2.54e-05	0.137	TTTTGTCCTAAGTCA	-44	IP_peak_5383	chr2B	47457409	47457724	316	47457590	6.92	5.83933	6.97051	3.48617	Promoter (<=1kb)	chr2B	47458368	47458724	357	1	+	TraesCS2B02G100700LC	TraesCS2B02G100700LC.1	-778
WTTTYCTCYAAGTCC	MEME-3	chr1A	303858793	303858807	-	10.6463	2.54e-05	0.137	TTTTTGTCAATGTCT	-20	IP_peak_573	chr1A	303858673	303858947	275	303858827	5.19	5.30804	7.58964	3.97097	Promoter (<=1kb)	chr1A	303853527	303858626	5100	4	-	TraesCS1A02G170200	TraesCS1A02G170200.1	-201
WTTTYCTCYAAGTCC	MEME-3	chr3D	49434596	49434610	+	10.5976	2.59e-05	0.138	AAAATGCCCAAGTCT	-56	IP_peak_11595	chr3D	49434435	49434682	248	49434666	5.19	4.28221	5.12651	2.0135	Promoter (1-2kb)	chr3D	49435925	49441750	5826	5	+	TraesCS3D02G099000LC	TraesCS3D02G099000LC.1	-1259
WTTTYCTCYAAGTCC	MEME-3	chr2D	154989193	154989207	+	10.5488	2.64e-05	0.139	TTTTTGTCCAAATCC	-178	IP_peak_7298	chr2D	154989111	154989497	387	154989385	10.38	6.23751	8.84686	5.114	Promoter (<=1kb)	chr2D	154988144	154988509	366	1	-	TraesCS2D02G221000LC	TraesCS2D02G221000LC.1	-876
WTTTYCTCYAAGTCC	MEME-3	chr3B	625419529	625419543	-	10.5488	2.64e-05	0.139	ATTTTTTATATGTCT	64	IP_peak_10897	chr3B	625419459	625419997	539	625419465	12.12	3.27879	4.79185	1.75235	Promoter (1-2kb)	chr3B	625421251	625421457	207	1	+	TraesCS3B02G396600	TraesCS3B02G396600.1	-1786
WTTTYCTCYAAGTCC	MEME-3	chr5A	41089599	41089613	-	10.5366	2.66e-05	0.139	ATTTTTTCTAAATCC	-71	IP_peak_16607	chr5A	41089478	41089766	289	41089684	12.12	6.55758	10.1966	6.23501	Promoter (<=1kb)	chr5A	41090075	41090392	318	1	+	TraesCS5A02G067400LC	TraesCS5A02G067400LC.1	-391
WTTTYCTCYAAGTCC	MEME-3	chr4A	38726120	38726134	+	10.5	2.69e-05	0.139	TTTTTGACCATGTAT	-191	IP_peak_12821	chr4A	38726116	38726415	300	38726325	9.52	5.25952	6.95302	3.47631	Promoter (1-2kb)	chr4A	38727948	38728532	585	1	+	TraesCS4A02G047800	TraesCS4A02G047800.1	-1623
WTTTYCTCYAAGTCC	MEME-3	chr5A	479207036	479207050	+	10.5	2.69e-05	0.139	TTTTTGACCATGTAT	-60	IP_peak_17388	chr5A	479206923	479207215	293	479207110	13.85	5.69745	8.70964	4.98096	Promoter (1-2kb)	chr5A	479200118	479205257	5140	7	-	TraesCS5A02G268400	TraesCS5A02G268400.1	-1853
WTTTYCTCYAAGTCC	MEME-3	chr5A	678576388	678576402	+	10.4512	2.75e-05	0.139	ATTTTTAACATGTCC	-235	IP_peak_17899	chr5A	678576109	678576675	567	678576637	9.52	3.50635	4.33257	1.47231	Promoter (1-2kb)	chr5A	678572566	678574745	2180	3	-	TraesCS5A02G515100	TraesCS5A02G515100.1	-1892
WTTTYCTCYAAGTCC	MEME-3	chr5A	610217462	610217476	+	10.439	2.76e-05	0.139	ATATTTTTCAAGTAC	33	IP_peak_17710	chr5A	610217306	610217577	272	610217429	13.85	3.71147	5.46828	2.29879	Promoter (<=1kb)	chr5A	610217812	610223278	5467	4	+	TraesCS5A02G424900	TraesCS5A02G424900.1	-383
WTTTYCTCYAAGTCC	MEME-3	chr2B	95884905	95884919	-	10.4268	2.78e-05	0.139	TTTTTTACCATGTAT	64	IP_peak_5501	chr2B	95884474	95884982	509	95884841	9.52	5.25952	6.95302	3.47631	Promoter (1-2kb)	chr2B	95881108	95883429	2322	2	-	TraesCS2B02G177300LC	TraesCS2B02G177300LC.1	-1412
WTTTYCTCYAAGTCC	MEME-3	chr5D	420923612	420923626	-	10.4268	2.78e-05	0.139	TTTTTTACCATGTAT	63	IP_peak_20235	chr5D	420923417	420923704	288	420923549	14.71	7.75532	12.367	8.24831	Promoter (1-2kb)	chr5D	420919338	420922256	2919	4	-	TraesCS5D02G328400	TraesCS5D02G328400.1	-1293
WTTTYCTCYAAGTCC	MEME-3	chr3A	699981267	699981281	+	10.4146	2.79e-05	0.14	TTTTTGCACAAGTCA	-64	IP_peak_9606	chr3A	699981199	699981422	224	699981345	7.79	5.26548	6.25917	2.90391	Promoter (1-2kb)	chr3A	699982397	699983605	1209	1	+	TraesCS3A02G466000	TraesCS3A02G466000.1	-1052
WTTTYCTCYAAGTCC	MEME-3	chr2B	87925581	87925595	-	10.4024	2.8e-05	0.14	AAATATGCTAAGTAC	33	IP_peak_5476	chr2B	87925148	87925670	523	87925548	12.12	6.55758	10.1966	6.23501	Promoter (1-2kb)	chr2B	87922142	87924152	2011	4	-	TraesCS2B02G164800LC	TraesCS2B02G164800LC.1	-1396
WTTTYCTCYAAGTCC	MEME-3	chr6B	538069710	538069724	-	10.378	2.83e-05	0.14	TTATTCTACAAGTCG	-217	IP_peak_22989	chr6B	538069494	538070067	574	538069941	7.79	6.07755	7.58236	3.97097	Promoter (1-2kb)	chr6B	538065436	538068717	3282	5	-	TraesCS6B02G300100	TraesCS6B02G300100.1	-1224
WTTTYCTCYAAGTCC	MEME-3	chr6A	22201356	22201370	+	10.3659	2.84e-05	0.14	TCTTTTTCCAAGTTT	-99	IP_peak_20763	chr6A	22201305	22201567	263	22201469	6.06	6.04984	9.21445	5.3363	Promoter (<=1kb)	chr6A	22199707	22200977	1271	1	-	TraesCS6A02G042200	TraesCS6A02G042200.1	-492
WTTTYCTCYAAGTCC	MEME-3	chr2D	11825556	11825570	+	10.3415	2.87e-05	0.141	TTTTCTTTCAAGTTT	-98	IP_peak_6920	chr2D	11825526	11826011	486	11825668	10.38	5.69221	7.99793	4.33317	Promoter (<=1kb)	chr2D	11823401	11824898	1498	3	-	TraesCS2D02G028900	TraesCS2D02G028900.1	-770
WTTTYCTCYAAGTCC	MEME-3	chr3A	14855954	14855968	+	10.3293	2.88e-05	0.141	TACTTGTCTAAGTTT	-168	IP_peak_8213	chr3A	14855903	14856289	387	14856136	11.25	8.21784	12.5877	8.45473	Promoter (1-2kb)	chr3A	14853622	14854591	970	2	-	TraesCS3A02G027800	TraesCS3A02G027800.1	-1545
WTTTYCTCYAAGTCC	MEME-3	chr3A	463113271	463113285	-	10.3171	2.9e-05	0.141	ATATATACTACGTCC	3	IP_peak_9031	chr3A	463113101	463113339	239	463113268	4.33	4.56623	6.03134	2.69714	Promoter (1-2kb)	chr3A	463114562	463118378	3817	1	+	TraesCS3A02G246400	TraesCS3A02G246400.1	-1294
WTTTYCTCYAAGTCC	MEME-3	chr6B	255460759	255460773	-	10.2927	2.93e-05	0.141	CTTTTTACTAAGTTT	-70	IP_peak_22572	chr6B	255460707	255461151	445	255460843	8.65	6.67599	8.88947	5.14526	Promoter (1-2kb)	chr6B	255458871	255459593	723	3	-	TraesCS6B02G325700LC	TraesCS6B02G325700LC.1	-1250
WTTTYCTCYAAGTCC	MEME-3	chr4B	43747821	43747835	+	10.2805	2.94e-05	0.141	TTTTTGAATAAGTAT	180	IP_peak_14412	chr4B	43747470	43747838	369	43747641	7.79	4.15509	4.65474	1.63345	Promoter (1-2kb)	chr4B	43748885	43753028	4144	7	+	TraesCS4B02G055000	TraesCS4B02G055000.1	-1244
WTTTYCTCYAAGTCC	MEME-3	chr3D	92361120	92361134	-	10.2805	2.94e-05	0.141	AAATATCCTAAGTAC	110	IP_peak_11701	chr3D	92360782	92361407	626	92361010	11.25	10.5007	18.0879	13.6263	Promoter (1-2kb)	chr3D	92356945	92359860	2916	2	-	TraesCS3D02G132800	TraesCS3D02G132800.1	-1150
WTTTYCTCYAAGTCC	MEME-3	chr3B	380867520	380867534	+	10.2561	2.97e-05	0.142	TTTTTTAAAAAGTCC	-156	IP_peak_10507	chr3B	380867459	380867751	293	380867690	5.19	4.28221	5.12651	2.0135	Promoter (<=1kb)	chr3B	380868141	380871614	3474	8	+	TraesCS3B02G241400	TraesCS3B02G241400.1	-451
WTTTYCTCYAAGTCC	MEME-3	chr1B	3272326	3272340	+	10.2439	2.98e-05	0.142	TATATTTCCATGTCT	-158	IP_peak_1277	chr1B	3272194	3272592	399	3272498	12.98	3.49513	4.79185	1.75235	Promoter (1-2kb)	chr1B	3274119	3274496	378	1	+	TraesCS1B02G006800LC	TraesCS1B02G006800LC.1	-1621
WTTTYCTCYAAGTCC	MEME-3	chr6D	272864191	272864205	+	10.2439	2.98e-05	0.142	ATTTTGACCATGTAT	20	IP_peak_23909	chr6D	272863996	272864285	290	272864171	8.65	8.27526	12.6304	8.46143	Promoter (<=1kb)	chr6D	272860860	272863407	2548	4	-	TraesCS6D02G196600	TraesCS6D02G196600.6	-764
WTTTYCTCYAAGTCC	MEME-3	chr3B	651414781	651414795	-	10.2439	2.98e-05	0.142	ATTTTTCCTACGTAT	-5	IP_peak_10945	chr3B	651414634	651414895	262	651414800	5.19	5.25471	7.4151	3.8892	Promoter (1-2kb)	chr3B	651409548	651413143	3596	8	-	TraesCS3B02G604500LC	TraesCS3B02G604500LC.1	-1657
WTTTYCTCYAAGTCC	MEME-3	chr5B	419614877	419614891	+	10.2317	3e-05	0.142	AATTTAACTAAGTTT	130	IP_peak_18759	chr5B	419614628	419614953	326	419614747	6.06	5.37835	7.35958	3.85322	Promoter (<=1kb)	chr5B	419615553	419618365	2813	2	+	TraesCS5B02G238900	TraesCS5B02G238900.1	-806
WTTTYCTCYAAGTCC	MEME-3	chr5A	69105643	69105657	+	10.2195	3.01e-05	0.142	TTTTTACCAAAGTCT	-186	IP_peak_16667	chr5A	69105639	69106010	372	69105843	9.52	7.7527	11.1759	7.12142	Promoter (1-2kb)	chr5A	69101385	69104104	2720	6	-	TraesCS5A02G063800	TraesCS5A02G063800.1	-1739
WTTTYCTCYAAGTCC	MEME-3	chr6D	291240984	291240998	+	10.2195	3.01e-05	0.142	AATTTGAATAAGTTC	0	IP_peak_23933	chr6D	291240830	291241112	283	291240994	10.38	5.69221	7.99793	4.33317	Promoter (1-2kb)	chr6D	291242304	291245537	3234	3	+	TraesCS6D02G205400	TraesCS6D02G205400.1	-1310
WTTTYCTCYAAGTCC	MEME-3	chr6D	454478790	454478804	+	10.2195	3.01e-05	0.142	ATTTTTTCCAAATCC	-20	IP_peak_24295	chr6D	454478655	454478925	271	454478824	8.65	6.67599	8.88947	5.14526	Promoter (1-2kb)	chr6D	454480146	454485765	5620	20	+	TraesCS6D02G364900	TraesCS6D02G364900.1	-1322
WTTTYCTCYAAGTCC	MEME-3	chr5D	515095422	515095436	-	10.2195	3.01e-05	0.142	ATATTGTCTACGTAT	52	IP_peak_20515	chr5D	515095281	515095636	356	515095370	8.65	4.82684	5.94877	2.69714	Promoter (1-2kb)	chr5D	515093773	515094300	528	1	-	TraesCS5D02G475600	TraesCS5D02G475600.1	-1070
WTTTYCTCYAAGTCC	MEME-3	chr3D	366209517	366209531	-	10.1951	3.04e-05	0.143	TTTTTATACAAGTTC	-57	IP_peak_12084	chr3D	366209410	366209729	320	366209588	9.52	7.27444	10.2419	6.26689	Promoter (<=1kb)	chr3D	366208019	366208852	834	1	-	TraesCS3D02G264500	TraesCS3D02G264500.1	-736
WTTTYCTCYAAGTCC	MEME-3	chr3D	426412993	426413007	-	10.1951	3.04e-05	0.143	ATTTGTGCCAAGTCA	4	IP_peak_12197	chr3D	426412811	426413075	265	426412989	6.06	4.88066	6.32584	2.93935	Promoter (<=1kb)	chr3D	426413173	426434539	21367	7	+	TraesCS3D02G402500LC	TraesCS3D02G402500LC.1	-184
WTTTYCTCYAAGTCC	MEME-3	chr1D	164855838	164855852	-	10.1707	3.07e-05	0.143	ATTTTTTTTAAGTTT	-43	IP_peak_2917	chr1D	164855804	164856085	282	164855895	7.79	5.89569	7.26834	3.77083	Promoter (<=1kb)	chr1D	164853923	164855212	1290	4	-	TraesCS1D02G193800LC	TraesCS1D02G193800LC.1	-683
WTTTYCTCYAAGTCC	MEME-3	chrUn	214932770	214932784	-	10.1707	3.07e-05	0.143	GTTTTTCCTAAGTTT	18	IP_peak_29279	chrUn	214932564	214932899	336	214932752	51.06	4.73243	20.1592	15.552	Promoter (<=1kb)	chrUn	214930990	214932044	1055	2	-	TraesCSU02G270000LC	TraesCSU02G270000LC.1	-708
WTTTYCTCYAAGTCC	MEME-3	chr7D	596884638	596884652	+	10.1707	3.07e-05	0.143	ATATTTTTTAAGTTC	0	IP_peak_28825	chr7D	596884388	596884765	378	596884649	15.58	5.51243	9.29694	5.40909	Promoter (<=1kb)	chr7D	596880052	596883751	3700	4	-	TraesCS7D02G661310LC	TraesCS7D02G661310LC.1	-898
WTTTYCTCYAAGTCC	MEME-3	chr1D	493223256	493223270	+	10.1463	3.1e-05	0.143	AATTCAACCAAGTTT	65	IP_peak_3583	chr1D	493223032	493223558	527	493223191	11.25	8.47132	13.0666	8.8809	Promoter (1-2kb)	chr1D	493225143	493225726	584	2	+	TraesCS1D02G589100LC	TraesCS1D02G589100LC.1	-1952
WTTTYCTCYAAGTCC	MEME-3	chr6A	93166741	93166755	+	10.1098	3.15e-05	0.144	AATTTTTTTAAGTCA	-27	IP_peak_20949	chr6A	93166709	93166944	236	93166782	5.19	4.15408	4.89461	1.84722	Promoter (<=1kb)	chr6A	93165617	93165790	174	1	-	TraesCS6A02G162600LC	TraesCS6A02G162600LC.1	-992
WTTTYCTCYAAGTCC	MEME-3	chr4D	432586261	432586275	-	10.1098	3.15e-05	0.144	TTTTTTTTCAAGTTT	81	IP_peak_16233	chr4D	432586001	432586424	424	432586180	9.52	7.50596	10.6819	6.68996	Promoter (<=1kb)	chr4D	432586712	432590986	4275	10	+	TraesCS4D02G261400	TraesCS4D02G261400.1	-532
WTTTYCTCYAAGTCC	MEME-3	chr2A	476217594	476217608	-	10.1098	3.15e-05	0.144	TTTTTTTTCAAGTTT	152	IP_peak_4487	chr2A	476217435	476217665	231	476217442	9.52	4.49899	5.82037	2.62029	Promoter (1-2kb)	chr2A	476218525	476222799	4275	4	+	TraesCS2A02G284100	TraesCS2A02G284100.1	-1083
WTTTYCTCYAAGTCC	MEME-3	chr4A	733429672	733429686	-	10.1098	3.15e-05	0.144	ACTTTTTCCAAGTTT	0	IP_peak_14263	chr4A	733429581	733429943	363	733429683	13.85	4.94863	7.53305	3.97097	Promoter (1-2kb)	chr4A	733430875	733433950	3076	7	+	TraesCS4A02G473400	TraesCS4A02G473400.1	-1192
WTTTYCTCYAAGTCC	MEME-3	chr1D	10441586	10441600	-	10.0854	3.18e-05	0.145	AATTTCATCAAGTTC	0	IP_peak_2613	chr1D	10441484	10441733	250	10441589	8.65	4.82684	5.94877	2.69714	Promoter (1-2kb)	chr1D	10439731	10440153	423	1	-	TraesCS1D02G022000LC	TraesCS1D02G022000LC.1	-1436
WTTTYCTCYAAGTCC	MEME-3	chr6B	202756236	202756250	+	10.0366	3.24e-05	0.145	TTTTTTGCTACGTTT	-6	IP_peak_22515	chr6B	202756115	202756357	243	202756256	6.06	5.37835	7.35958	3.85322	Promoter (1-2kb)	chr6B	202754523	202754825	303	1	-	TraesCS6B02G278300LC	TraesCS6B02G278300LC.1	-1431
WTTTYCTCYAAGTCC	MEME-3	chr3D	73207390	73207404	+	10.0244	3.25e-05	0.145	ATATTGTCCATGTAT	54	IP_peak_11665	chr3D	73206967	73207437	471	73207336	11.25	7.4388	11.2104	7.15083	Promoter (<=1kb)	chr3D	73204066	73206665	2600	3	-	TraesCS3D02G118500	TraesCS3D02G118500.1	-671
WTTTYCTCYAAGTCC	MEME-3	chr1D	263197005	263197019	-	10.0244	3.25e-05	0.145	ATTTTGAATAAGTAT	157	IP_peak_3035	chr1D	263196744	263197093	350	263196848	15.58	8.28831	13.7287	9.50863	Promoter (1-2kb)	chr1D	263198243	263198944	702	1	+	TraesCS1D02G294800LC	TraesCS1D02G294800LC.1	-1395
WTTTYCTCYAAGTCC	MEME-3	chr4D	399190648	399190662	+	10.0244	3.25e-05	0.145	ATTTTGAATAAGTAT	-79	IP_peak_16165	chr4D	399190571	399190967	397	399190741	8.65	4.82684	5.94877	2.69714	Promoter (<=1kb)	chr4D	399188497	399190339	1843	1	-	TraesCS4D02G237200	TraesCS4D02G237200.1	-402
WTTTYCTCYAAGTCC	MEME-3	chr3A	429619949	429619963	+	10.0244	3.25e-05	0.145	ATTTTGAATAAGTAT	192	IP_peak_8962	chr3A	429619620	429620045	426	429619757	7.79	6.07755	7.58236	3.97097	Promoter (1-2kb)	chr3A	429615380	429618754	3375	7	-	TraesCS3A02G229800	TraesCS3A02G229800.1	-1003
WTTTYCTCYAAGTCC	MEME-3	chr5D	491004450	491004464	-	10.0244	3.25e-05	0.145	ATATTGTCCATGTAT	130	IP_peak_20451	chr5D	491004178	491004557	380	491004320	6.06	6.04984	9.21445	5.3363	Promoter (1-2kb)	chr5D	490998273	491002776	4504	6	-	TraesCS5D02G436900	TraesCS5D02G436900.1	-1544
WTTTYCTCYAAGTCC	MEME-3	chr2A	563200218	563200232	-	10.0244	3.25e-05	0.145	ATTTTGAATAAGTAT	-55	IP_peak_4630	chr2A	563200113	563200423	311	563200287	16.44	8.721	14.9606	10.6567	Promoter (<=1kb)	chr2A	563200645	563201325	681	1	+	TraesCS2A02G479900LC	TraesCS2A02G479900LC.1	-358
WTTTYCTCYAAGTCC	MEME-3	chr3D	598050121	598050135	+	10	3.28e-05	0.146	ATTTTTAAAAAGTCC	46	IP_peak_12637	chr3D	598049949	598050250	302	598050075	30.29	5.10461	14.0554	9.82928	Promoter (<=1kb)	chr3D	598047864	598049310	1447	1	-	TraesCS3D02G514300	TraesCS3D02G514300.1	-765
WTTTYCTCYAAGTCC	MEME-3	chr3B	43312018	43312032	-	9.97561	3.32e-05	0.146	TTTTTGGCCATGTCG	-39	IP_peak_9969	chr3B	43311709	43312191	483	43312071	9.52	4.49899	5.82037	2.62029	Promoter (<=1kb)	chr3B	43312959	43314365	1407	1	+	TraesCS3B02G071800	TraesCS3B02G071800.1	-888
WTTTYCTCYAAGTCC	MEME-3	chr7B	457395206	457395220	+	9.97561	3.32e-05	0.146	TTTAGTTCTAAGTAC	53	IP_peak_26867	chr7B	457395006	457395306	301	457395153	4.33	4.56623	6.03134	2.69714	Promoter (1-2kb)	chr7B	457397144	457402404	5261	8	+	TraesCS7B02G247100	TraesCS7B02G247100.1	-1991
WTTTYCTCYAAGTCC	MEME-3	chr1B	8945812	8945826	+	9.96341	3.33e-05	0.146	TTTTTGAACAAGTAT	68	IP_peak_1292	chr1B	8945608	8945860	253	8945744	12.12	6.55758	10.1966	6.23501	Promoter (<=1kb)	chr1B	8946401	8948562	2162	2	+	TraesCS1B02G018900	TraesCS1B02G018900.1	-657
WTTTYCTCYAAGTCC	MEME-3	chr3A	88551909	88551923	+	9.96341	3.33e-05	0.146	TTTTTGAACAAGTAT	-42	IP_peak_8431	chr3A	88551863	88552193	331	88551965	12.98	4.66017	6.6833	3.25404	Promoter (<=1kb)	chr3A	88548543	88551493	2951	4	-	TraesCS3A02G117900	TraesCS3A02G117900.1	-472
WTTTYCTCYAAGTCC	MEME-3	chr3D	428967278	428967292	-	9.96341	3.33e-05	0.146	TTTTTGAACAAGTAT	41	IP_peak_12203	chr3D	428967214	428967483	270	428967237	5.19	4.28221	5.12651	2.0135	Promoter (<=1kb)	chr3D	428968013	428973046	5034	7	+	TraesCS3D02G315200	TraesCS3D02G315200.1	-776
WTTTYCTCYAAGTCC	MEME-3	chr5B	662940534	662940548	+	9.93902	3.36e-05	0.147	TTATTTTCTATGTTT	-159	IP_peak_19252	chr5B	662940530	662940949	420	662940707	11.25	7.3394	11.0426	6.99154	Promoter (1-2kb)	chr5B	662942324	662943734	1411	2	+	TraesCS5B02G495100	TraesCS5B02G495100.1	-1617
WTTTYCTCYAAGTCC	MEME-3	chr7A	570183290	570183304	-	9.92683	3.38e-05	0.147	ATTTTGTTCAAGTTT	-194	IP_peak_25599	chr7A	570183124	570183677	554	570183498	11.25	8.47132	13.0666	8.8809	Promoter (<=1kb)	chr7A	570182604	570182951	348	1	-	TraesCS7A02G553800LC	TraesCS7A02G553800LC.1	-547
WTTTYCTCYAAGTCC	MEME-3	chr1D	75913876	75913890	-	9.90244	3.41e-05	0.148	TTATTGTTTATGTCC	214	IP_peak_2785	chr1D	75913569	75914209	641	75913662	6.06	6.04984	9.21445	5.3363	Promoter (<=1kb)	chr1D	75912133	75912696	564	1	-	TraesCS1D02G118600LC	TraesCS1D02G118600LC.1	-966
WTTTYCTCYAAGTCC	MEME-3	chr4A	90877846	90877860	-	9.90244	3.41e-05	0.148	AATTTGAACAAGTTC	119	IP_peak_12919	chr4A	90877585	90877876	292	90877727	8.65	4.82684	5.94877	2.69714	Promoter (<=1kb)	chr4A	90878561	90885916	7356	3	+	TraesCS4A02G086700	TraesCS4A02G086700.1	-834
WTTTYCTCYAAGTCC	MEME-3	chr4D	442163952	442163966	-	9.90244	3.41e-05	0.148	AATTTGGACAAGTTC	37	IP_peak_16254	chr4D	442163843	442164066	224	442163915	8.65	7.75199	11.148	7.09562	Promoter (<=1kb)	chr4D	442164847	442169345	4499	8	+	TraesCS4D02G271400	TraesCS4D02G271400.1	-932
WTTTYCTCYAAGTCC	MEME-3	chr5D	460947423	460947437	+	9.89024	3.43e-05	0.148	TTTTTTAACAAGTAT	70	IP_peak_20366	chr5D	460947199	460947566	368	460947353	9.52	3.50635	4.33257	1.47231	Promoter (1-2kb)	chr5D	460945443	460945937	495	1	-	TraesCS5D02G485800LC	TraesCS5D02G485800LC.1	-1416
WTTTYCTCYAAGTCC	MEME-3	chr1D	59127785	59127799	-	9.86585	3.47e-05	0.149	AATTTCTTCAAGTTT	82	IP_peak_2749	chr1D	59127484	59127907	424	59127703	8.65	6.88847	9.28392	5.40077	Promoter (1-2kb)	chr1D	59129120	59134806	5687	6	+	TraesCS1D02G077300	TraesCS1D02G077300.1	-1417
WTTTYCTCYAAGTCC	MEME-3	chr1D	293913771	293913785	+	9.86585	3.47e-05	0.149	ATTTCATCCATGTCA	40	IP_peak_3091	chr1D	293913637	293913925	289	293913731	3.46	3.82443	4.55152	1.54075	Promoter (1-2kb)	chr1D	293907258	293912241	4984	14	-	TraesCS1D02G207600	TraesCS1D02G207600.2	-1490
WTTTYCTCYAAGTCC	MEME-3	chr1A	454527273	454527287	+	9.85366	3.48e-05	0.149	ATTTTTTTCAAGTTT	-88	IP_peak_852	chr1A	454527268	454527687	420	454527375	12.12	9.06977	14.5322	10.2469	Promoter (<=1kb)	chr1A	454524209	454526612	2404	2	-	TraesCS1A02G260600	TraesCS1A02G260600.1	-763
WTTTYCTCYAAGTCC	MEME-3	chr5A	570174045	570174059	-	9.85366	3.48e-05	0.149	ATTTTTTTCAAGTTT	-78	IP_peak_17620	chr5A	570173611	570174166	556	570174137	9.52	6.65831	9.15511	5.3363	Promoter (<=1kb)	chr5A	570175107	570175833	727	2	+	TraesCS5A02G371000	TraesCS5A02G371000.1	-970
WTTTYCTCYAAGTCC	MEME-3	chr5B	457972468	457972482	-	9.81707	3.53e-05	0.15	TTATTTTCTACGTTT	-30	IP_peak_18846	chr5B	457972385	457972797	413	457972512	7.79	4.64484	5.34496	2.20598	Promoter (1-2kb)	chr5B	457966329	457970659	4331	5	-	TraesCS5B02G272500	TraesCS5B02G272500.1	-1853
WTTTYCTCYAAGTCC	MEME-3	chr5A	671980849	671980863	+	9.81707	3.53e-05	0.15	ATATCTGCCATGTTC	69	IP_peak_17876	chr5A	671980603	671980882	280	671980780	6.06	5.37835	7.35958	3.85322	Promoter (1-2kb)	chr5A	671976951	671978784	1834	3	-	TraesCS5A02G507700	TraesCS5A02G507700.1	-1996
WTTTYCTCYAAGTCC	MEME-3	chr7B	40580771	40580785	-	9.78049	3.58e-05	0.15	ATCTTGACCAAGTAT	-179	IP_peak_26168	chr7B	40580250	40581267	1018	40580964	12.98	8.84934	13.1048	8.91754	Promoter (<=1kb)	chr7B	40581376	40583224	1849	2	+	TraesCS7B02G041000	TraesCS7B02G041000.1	-412
WTTTYCTCYAAGTCC	MEME-3	chr7A	202098046	202098060	+	9.7561	3.61e-05	0.151	AATTTTATTAAGTAC	19	IP_peak_24934	chr7A	202097869	202098231	363	202098027	8.65	6.67599	8.88947	5.14526	Promoter (1-2kb)	chr7A	202099822	202100238	417	1	+	TraesCS7A02G297200LC	TraesCS7A02G297200LC.1	-1795
WTTTYCTCYAAGTCC	MEME-3	chr6B	388105669	388105683	+	9.71951	3.66e-05	0.151	ATTTTTGCAAAGTAT	68	IP_peak_22739	chr6B	388105503	388105821	319	388105601	5.19	5.30804	7.58964	3.97097	Promoter (<=1kb)	chr6B	388106207	388114764	8558	2	+	TraesCS6B02G429700LC	TraesCS6B02G429700LC.1	-606
WTTTYCTCYAAGTCC	MEME-3	chr4D	84604996	84605010	-	9.70732	3.68e-05	0.151	ATATTGAACAAGTAC	129	IP_peak_15750	chr4D	84604736	84605076	341	84604867	12.12	8.93201	14.2657	10.0284	Promoter (<=1kb)	chr4D	84601345	84604297	2953	3	-	TraesCS4D02G106100	TraesCS4D02G106100.1	-570
WTTTYCTCYAAGTCC	MEME-3	chr7B	381840560	381840574	+	9.69512	3.69e-05	0.152	TATTTTGTCAAGTAC	-123	IP_peak_26752	chr7B	381840560	381840790	231	381840697	6.92	6.25026	7.81133	4.17224	Promoter (1-2kb)	chr7B	381835229	381838980	3752	5	-	TraesCS7B02G208700	TraesCS7B02G208700.1	-1717
WTTTYCTCYAAGTCC	MEME-3	chr7B	84246100	84246114	+	9.68293	3.71e-05	0.152	ATATTTTCTATGTTT	-88	IP_peak_26263	chr7B	84246055	84246314	260	84246202	9.52	3.50635	4.33257	1.47231	Promoter (1-2kb)	chr7B	84244074	84244537	464	2	-	TraesCS7B02G124710LC	TraesCS7B02G124710LC.1	-1665
WTTTYCTCYAAGTCC	MEME-3	chr3B	47469851	47469865	+	9.64634	3.77e-05	0.153	TTACTTCCTACGTCC	-16	IP_peak_9975	chr3B	47469442	47469919	478	47469881	6.92	5.65349	6.6293	3.20911	Promoter (1-2kb)	chr3B	47463248	47468255	5008	5	-	TraesCS3B02G077100	TraesCS3B02G077100.2	-1626
WTTTYCTCYAAGTCC	MEME-3	chr6A	121234116	121234130	+	9.60976	3.82e-05	0.154	AATTTTTACAAGTTT	-77	IP_peak_21019	chr6A	121234045	121234281	237	121234207	6.92	6.72341	9.01018	5.25107	Promoter (<=1kb)	chr6A	121235175	121236487	1313	3	+	TraesCS6A02G143800	TraesCS6A02G143800.1	-968
WTTTYCTCYAAGTCC	MEME-3	chr2B	45643995	45644009	+	9.57317	3.87e-05	0.154	TATTTTTCTAAATCC	129	IP_peak_5380	chr2B	45643748	45644609	862	45643866	4.33	4.56623	6.03134	2.69714	Promoter (1-2kb)	chr2B	45640693	45642160	1468	3	-	TraesCS2B02G081800	TraesCS2B02G081800.1	-1706
WTTTYCTCYAAGTCC	MEME-3	chr1B	13566550	13566564	+	9.56098	3.89e-05	0.154	AGTTTCACCAAGTTT	-17	IP_peak_1302	chr1B	13566469	13567019	551	13566581	29.42	3.80281	10.0007	6.07057	Promoter (1-2kb)	chr1B	13564868	13565083	216	1	-	TraesCS1B02G028200	TraesCS1B02G028200.1	-1498
WTTTYCTCYAAGTCC	MEME-3	chr1A	544432791	544432805	+	9.56098	3.89e-05	0.154	TTTTTCATCAAGTTT	-11	IP_peak_1095	chr1A	544432625	544432865	241	544432816	8.65	4.82684	5.94877	2.69714	Promoter (<=1kb)	chr1A	544427748	544432403	4656	3	-	TraesCS1A02G518900LC	TraesCS1A02G518900LC.1	-413
WTTTYCTCYAAGTCC	MEME-3	chr2B	791412469	791412483	+	9.54878	3.91e-05	0.154	TTTTCAAATAAGTAC	-76	IP_peak_6834	chr2B	791412420	791412865	446	791412559	8.65	5.78396	7.39136	3.87996	Promoter (1-2kb)	chr2B	791408434	791411332	2899	4	-	TraesCS2B02G910000LC	TraesCS2B02G910000LC.1	-1227
WTTTYCTCYAAGTCC	MEME-3	chr5D	371860911	371860925	+	9.52439	3.94e-05	0.155	TTTCCCATCAAGTCT	-75	IP_peak_20125	chr5D	371860859	371861116	258	371861000	5.19	5.30804	7.58964	3.97097	Promoter (1-2kb)	chr5D	371862030	371863853	1824	1	+	TraesCS5D02G268800	TraesCS5D02G268800.1	-1030
WTTTYCTCYAAGTCC	MEME-3	chr3D	28497180	28497194	-	9.42683	4.08e-05	0.158	TTCTTCTCTATGTCA	-178	IP_peak_11528	chr3D	28497047	28497526	480	28497372	6.92	5.4791	6.32584	2.93935	Promoter (<=1kb)	chr3D	28498097	28498438	342	1	+	TraesCS3D02G062500LC	TraesCS3D02G062500LC.1	-725
WTTTYCTCYAAGTCC	MEME-3	chr6D	96645342	96645356	-	9.37805	4.15e-05	0.159	TTATTATTTAAGTCT	-186	IP_peak_23675	chr6D	96645033	96645576	544	96645542	7.79	4.99833	5.85846	2.65567	Promoter (1-2kb)	chr6D	96640750	96644417	3668	3	-	TraesCS6D02G130000	TraesCS6D02G130000.1	-1125
WTTTYCTCYAAGTCC	MEME-3	chr7B	154360407	154360421	+	9.37805	4.15e-05	0.159	AAATACTACAAGTCT	176	IP_peak_26410	chr7B	154360165	154360526	362	154360231	9.52	5.25952	6.95302	3.47631	Promoter (1-2kb)	chr7B	154308774	154358556	49783	14	-	TraesCS7B02G204400LC	TraesCS7B02G204400LC.1	-1675
WTTTYCTCYAAGTCC	MEME-3	chr5A	546315923	546315937	-	9.37805	4.15e-05	0.159	AATTCCGCAAAGTTT	-23	IP_peak_17554	chr5A	546315527	546316089	563	546315960	9.52	6.47549	8.85078	5.1169	Promoter (1-2kb)	chr5A	546313567	546314040	474	1	-	TraesCS5A02G473800LC	TraesCS5A02G473800LC.1	-1920
WTTTYCTCYAAGTCC	MEME-3	chr6B	709558392	709558406	+	9.37805	4.15e-05	0.159	AAATTGTCCATGTCA	-201	IP_peak_23364	chr6B	709558377	709558737	361	709558607	10.38	7.7533	11.4112	7.33867	Promoter (1-2kb)	chr6B	709559964	709561277	1314	1	+	TraesCS6B02G450800	TraesCS6B02G450800.1	-1357
WTTTYCTCYAAGTCC	MEME-3	chr5B	711992142	711992156	+	9.37805	4.15e-05	0.159	TTTATTTCCAAGTTA	-56	IP_peak_19410	chr5B	711992140	711992400	261	711992212	9.52	6.65831	9.15511	5.3363	Promoter (<=1kb)	chr5B	711992629	711996286	3658	5	+	TraesCS5B02G570100	TraesCS5B02G570100.1	-417
WTTTYCTCYAAGTCC	MEME-3	chr4B	1703492	1703506	+	9.36585	4.17e-05	0.159	ATATTTTCCATGTTT	104	IP_peak_14303	chr4B	1703211	1703651	441	1703388	10.38	4.86911	6.74011	3.30472	Promoter (<=1kb)	chr4B	1702052	1702591	540	1	-	TraesCS4B02G001100LC	TraesCS4B02G001100LC.1	-797
WTTTYCTCYAAGTCC	MEME-3	chr7A	430321872	430321886	-	9.36585	4.17e-05	0.159	CTTTTTTACAAGTAC	-128	IP_peak_25282	chr7A	430321799	430322083	285	430322014	9.52	5.25952	6.95302	3.47631	Promoter (<=1kb)	chr7A	430322200	430330966	8767	5	+	TraesCS7A02G305500	TraesCS7A02G305500.1	-186
WTTTYCTCYAAGTCC	MEME-3	chr1B	560489373	560489387	+	9.35366	4.19e-05	0.16	TATTTTTCAATGTCT	-115	IP_peak_2244	chr1B	560489313	560489653	341	560489502	10.38	4.86911	6.74011	3.30472	Promoter (1-2kb)	chr1B	560491193	560502850	11658	5	+	TraesCS1B02G575900LC	TraesCS1B02G575900LC.1	-1691
WTTTYCTCYAAGTCC	MEME-3	chr6B	25241479	25241493	-	9.34146	4.21e-05	0.16	AATTTGACTATGTAT	-120	IP_peak_22133	chr6B	25241457	25241681	225	25241613	9.52	6.30244	8.56867	4.84706	Promoter (1-2kb)	chr6B	25243118	25247238	4121	9	+	TraesCS6B02G040500	TraesCS6B02G040500.1	-1505
WTTTYCTCYAAGTCC	MEME-3	chr1D	262245070	262245084	+	9.32927	4.23e-05	0.16	ATTTAATCTATGTCT	-24	IP_peak_3033	chr1D	262244922	262245178	257	262245108	6.06	5.28847	7.15828	3.66472	Promoter (1-2kb)	chr1D	262246992	262248251	1260	3	+	TraesCS1D02G294200LC	TraesCS1D02G294200LC.1	-1884
WTTTYCTCYAAGTCC	MEME-3	chr3B	173245606	173245620	+	9.30488	4.26e-05	0.161	ATTTTCATCAAGTTT	47	IP_peak_10255	chr3B	173245505	173246136	632	173245559	7.79	4.39416	4.98931	1.91819	Promoter (1-2kb)	chr3B	173246838	173247696	859	1	+	TraesCS3B02G172900	TraesCS3B02G172900.1	-1279
WTTTYCTCYAAGTCC	MEME-3	chr5D	56129213	56129227	-	9.29268	4.28e-05	0.161	ATTTTTTATATGTAC	-205	IP_peak_19587	chr5D	56129209	56130074	866	56129432	11.25	4.08326	5.86499	2.65755	Promoter (<=1kb)	chr5D	56125885	56128899	3015	1	-	TraesCS5D02G059400	TraesCS5D02G059400.1	-533
WTTTYCTCYAAGTCC	MEME-3	chr6A	183186643	183186657	-	9.29268	4.28e-05	0.161	ATCATGTCTAAGTTC	-61	IP_peak_21132	chr6A	183186104	183186733	630	183186718	6.06	4.88066	6.32584	2.93935	Promoter (1-2kb)	chr6A	183187835	183189111	1277	1	+	TraesCS6A02G171900	TraesCS6A02G171900.1	-1117
WTTTYCTCYAAGTCC	MEME-3	chr5D	515112330	515112344	+	9.28049	4.3e-05	0.162	TATTTGTTTAAGTTT	179	IP_peak_20516	chr5D	515112060	515112443	384	515112151	8.65	4.82684	5.94877	2.69714	Promoter (1-2kb)	chr5D	515110454	515111011	558	1	-	TraesCS5D02G573000LC	TraesCS5D02G573000LC.1	-1140
WTTTYCTCYAAGTCC	MEME-3	chr6B	373894228	373894242	+	9.26829	4.32e-05	0.162	CTATTCACCAAGTCG	16	IP_peak_22719	chr6B	373894122	373894351	230	373894212	7.79	7.53345	10.897	6.85299	Promoter (<=1kb)	chr6B	373893268	373893921	654	3	-	TraesCS6B02G418900LC	TraesCS6B02G418900LC.2	-291
WTTTYCTCYAAGTCC	MEME-3	chr2D	7967396	7967410	-	9.23171	4.37e-05	0.163	TTTTTTATTAAGTAT	47	IP_peak_6886	chr2D	7967151	7967460	310	7967349	11.25	5.79166	8.55828	4.84154	Promoter (1-2kb)	chr2D	7969021	7973264	4244	3	+	TraesCS2D02G016400	TraesCS2D02G016400.1	-1672
WTTTYCTCYAAGTCC	MEME-3	chr7B	648102902	648102916	+	9.23171	4.37e-05	0.163	ATTATATCTAAGTTT	87	IP_peak_27277	chr7B	648102594	648103010	417	648102815	10.38	8.12345	12.1211	8.01632	Promoter (1-2kb)	chr7B	648103932	648109965	6034	9	+	TraesCS7B02G382300	TraesCS7B02G382300.1	-1117
WTTTYCTCYAAGTCC	MEME-3	chr3D	602729112	602729126	-	9.21951	4.39e-05	0.163	TTTATCTATAAGTAT	-36	IP_peak_12664	chr3D	602729066	602729354	289	602729162	5.19	5.06307	6.85018	3.3933	Promoter (<=1kb)	chr3D	602723144	602728520	5377	8	-	TraesCS3D02G520100	TraesCS3D02G520100.1	-642
WTTTYCTCYAAGTCC	MEME-3	chr2B	162874203	162874217	-	9.19512	4.43e-05	0.164	TTTTTACATAAGTAC	-85	IP_peak_5631	chr2B	162874115	162874409	295	162874302	6.92	4.87734	5.37022	2.22818	Promoter (<=1kb)	chr2B	162872445	162873846	1402	2	-	TraesCS2B02G187500	TraesCS2B02G187500.1	-456
WTTTYCTCYAAGTCC	MEME-3	chr6D	451094224	451094238	+	9.14634	4.51e-05	0.165	TATTATTACAAGTAC	-73	IP_peak_24278	chr6D	451094203	451094524	322	451094311	7.79	7.53345	10.897	6.85299	Promoter (1-2kb)	chr6D	451096216	451096449	234	1	+	TraesCS6D02G467600LC	TraesCS6D02G467600LC.1	-1905
WTTTYCTCYAAGTCC	MEME-3	chr7B	712466706	712466720	+	9.13415	4.53e-05	0.165	TTTTCACCTAAGTTA	173	IP_peak_27439	chr7B	712466506	712466821	316	712466533	10.38	3.79481	5.08049	1.98909	Promoter (1-2kb)	chr7B	712468331	712481767	13437	9	+	TraesCS7B02G450400	TraesCS7B02G450400.2	-1798
WTTTYCTCYAAGTCC	MEME-3	chr2A	123553293	123553307	+	9.12195	4.55e-05	0.165	AATATGTCTATGTAC	62	IP_peak_3945	chr2A	123553138	123553398	261	123553231	6.06	6.04984	9.21445	5.3363	Promoter (<=1kb)	chr2A	123547947	123552707	4761	12	-	TraesCS2A02G169100	TraesCS2A02G169100.1	-524
WTTTYCTCYAAGTCC	MEME-3	chr5B	337463508	337463522	-	9.12195	4.55e-05	0.165	GATTTATCTAAGTCA	77	IP_peak_18589	chr5B	337463284	337463569	286	337463431	6.92	6.72341	9.01018	5.25107	Promoter (<=1kb)	chr5B	337463807	337467818	4012	6	+	TraesCS5B02G185900	TraesCS5B02G185900.1	-376
WTTTYCTCYAAGTCC	MEME-3	chr4B	134827802	134827816	+	9.09756	4.58e-05	0.166	CTTTTCATCAAGTCT	72	IP_peak_14583	chr4B	134827653	134828096	444	134827730	6.06	5.03599	6.6293	3.20911	Promoter (1-2kb)	chr4B	134822636	134825806	3171	1	-	TraesCS4B02G116800	TraesCS4B02G116800.1	-1924
WTTTYCTCYAAGTCC	MEME-3	chr2B	716054765	716054779	+	9.08537	4.61e-05	0.166	ATTTTGCCAAAGTTT	8	IP_peak_6648	chr2B	716054693	716054945	253	716054757	9.52	5.25952	6.95302	3.47631	Promoter (1-2kb)	chr2B	716047267	716053507	6241	2	-	TraesCS2B02G521100	TraesCS2B02G521100.1	-1250
WTTTYCTCYAAGTCC	MEME-3	chr4B	628707425	628707439	+	9.06098	4.64e-05	0.167	TAATTGTCCATGTAT	-86	IP_peak_15412	chr4B	628707352	628707656	305	628707525	7.79	5.89569	7.26834	3.77083	Promoter (1-2kb)	chr4B	628708937	628710502	1566	2	+	TraesCS4B02G336500	TraesCS4B02G336500.1	-1412
WTTTYCTCYAAGTCC	MEME-3	chr1B	642956453	642956467	-	9.04878	4.66e-05	0.167	AAATAGACTAAGTCA	61	IP_peak_2444	chr1B	642956090	642956490	401	642956392	11.25	5.23923	7.69686	4.07175	Promoter (<=1kb)	chr1B	642956980	642958490	1511	2	+	TraesCS1B02G705800LC	TraesCS1B02G705800LC.1	-588
WTTTYCTCYAAGTCC	MEME-3	chr1A	487335494	487335508	-	9.03659	4.69e-05	0.167	CTTTTCTTCAAGTTC	9	IP_peak_933	chr1A	487335241	487335579	339	487335485	7.79	6.07755	7.58236	3.97097	Promoter (1-2kb)	chr1A	487330367	487333932	3566	7	-	TraesCS1A02G291100	TraesCS1A02G291100.1	-1553
WTTTYCTCYAAGTCC	MEME-3	chr7B	734406333	734406347	+	9.03659	4.69e-05	0.167	ATTTAGTCTATGTAT	62	IP_peak_27526	chr7B	734406110	734406445	336	734406271	5.19	3.71003	4.15211	1.3098	Promoter (1-2kb)	chr7B	734407735	734408358	624	1	+	TraesCS7B02G480900	TraesCS7B02G480900.1	-1464
WTTTYCTCYAAGTCC	MEME-3	chr4D	503793613	503793627	-	9.02439	4.71e-05	0.167	AATTTGTTTAAGTTT	-35	IP_peak_16444	chr4D	503793514	503793812	299	503793662	7.79	5.89569	7.26834	3.77083	Promoter (<=1kb)	chr4D	503791201	503793287	2087	8	-	TraesCS4D02G352800	TraesCS4D02G352800.1	-375
WTTTYCTCYAAGTCC	MEME-3	chr3A	509538580	509538594	-	9.02439	4.71e-05	0.167	AATTTGACCATGTAT	-74	IP_peak_9127	chr3A	509538445	509538878	434	509538668	9.52	5.25952	6.95302	3.47631	Promoter (<=1kb)	chr3A	509539178	509544159	4982	13	+	TraesCS3A02G280500	TraesCS3A02G280500.1	-510
WTTTYCTCYAAGTCC	MEME-3	chr7A	675386813	675386827	+	9.0122	4.73e-05	0.168	ATTTTTCCAAAGTTT	-49	IP_peak_25856	chr7A	675386427	675387169	743	675386876	8.65	7.48394	10.5124	6.52892	Promoter (<=1kb)	chr7A	675387409	675388070	662	3	+	TraesCS7A02G684300LC	TraesCS7A02G684300LC.1	-533
WTTTYCTCYAAGTCC	MEME-3	chr5B	11309945	11309959	+	8.9878	4.77e-05	0.168	TATACAACCAAGTAC	-7	IP_peak_18015	chr5B	11309789	11310126	338	11309966	6.92	6.79165	9.21445	5.3363	Promoter (1-2kb)	chr5B	11305908	11308910	3003	1	-	TraesCS5B02G011300	TraesCS5B02G011300.1	-1056
WTTTYCTCYAAGTCC	MEME-3	chr2B	726470617	726470631	+	8.9878	4.77e-05	0.168	TATTTTCTCAAGTTC	6	IP_peak_6674	chr2B	726470439	726470724	286	726470611	5.19	5.25471	7.4151	3.8892	Promoter (<=1kb)	chr2B	726468252	726469623	1372	3	-	TraesCS2B02G788400LC	TraesCS2B02G788400LC.1	-988
WTTTYCTCYAAGTCC	MEME-3	chr4D	388116323	388116337	-	8.96341	4.81e-05	0.168	TTTTCATCCATGTTT	0	IP_peak_16130	chr4D	388116201	388116466	266	388116328	6.06	6.04984	9.21445	5.3363	Promoter (<=1kb)	chr4D	388117089	388118648	1560	1	+	TraesCS4D02G228500	TraesCS4D02G228500.1	-761
WTTTYCTCYAAGTCC	MEME-3	chr2A	753227422	753227436	+	8.92683	4.87e-05	0.169	TAATCCTCCAAGTGC	58	IP_peak_5091	chr2A	753227282	753227555	274	753227364	6.92	5.01503	5.57871	2.39581	Promoter (<=1kb)	chr2A	753226310	753226486	177	1	-	TraesCS2A02G701200LC	TraesCS2A02G701200LC.1	-878
WTTTYCTCYAAGTCC	MEME-3	chr1D	482211371	482211385	-	8.91463	4.89e-05	0.17	GTTTTCTATAAGTAT	109	IP_peak_3537	chr1D	482211109	482211964	856	482211262	12.12	5.60935	8.68779	4.96	Promoter (1-2kb)	chr1D	482208616	482209628	1013	1	-	TraesCS1D02G432300	TraesCS1D02G432300.1	-1634
WTTTYCTCYAAGTCC	MEME-3	chr4A	598782426	598782440	-	8.91463	4.89e-05	0.17	AATTAGTCCATGTTC	177	IP_peak_13907	chr4A	598782097	598782496	400	598782249	10.38	9.30849	14.8582	10.5656	Promoter (<=1kb)	chr4A	598778315	598781666	3352	6	-	TraesCS4A02G302300	TraesCS4A02G302300.1	-583
WTTTYCTCYAAGTCC	MEME-3	chr3D	395994360	395994374	-	8.90244	4.91e-05	0.17	TTTTATAATAAGTAC	-83	IP_peak_12141	chr3D	395994286	395994639	354	395994457	6.06	6.04984	9.21445	5.3363	Promoter (<=1kb)	chr3D	395995397	395995819	423	1	+	TraesCS3D02G378300LC	TraesCS3D02G378300LC.1	-940
WTTTYCTCYAAGTCC	MEME-3	chr2A	41991592	41991606	-	8.89024	4.93e-05	0.17	TATTTTTTCAAGTTT	82	IP_peak_3764	chr2A	41991405	41991629	225	41991510	4.33	4.56623	6.03134	2.69714	Promoter (<=1kb)	chr2A	41992496	41994765	2270	3	+	TraesCS2A02G088600	TraesCS2A02G088600.1	-986
WTTTYCTCYAAGTCC	MEME-3	chr3D	10659496	10659510	-	8.87805	4.96e-05	0.17	AATCCGCCCAAGTTT	39	IP_peak_11460	chr3D	10659351	10659624	274	10659457	7.79	5.26548	6.25917	2.90391	Promoter (<=1kb)	chr3D	10659758	10663012	3255	3	+	TraesCS3D02G029400	TraesCS3D02G029400.1	-301
WTTTYCTCYAAGTCC	MEME-3	chr7A	170196989	170197003	+	8.87805	4.96e-05	0.17	TTTTCCTCTCAGTAC	190	IP_peak_24872	chr7A	170196771	170197007	237	170196799	4.33	4.56623	6.03134	2.69714	Promoter (1-2kb)	chr7A	170190854	170195732	4879	3	-	TraesCS7A02G207500	TraesCS7A02G207500.1	-1067
WTTTYCTCYAAGTCC	MEME-3	chr7D	598315532	598315546	+	8.87805	4.96e-05	0.17	ATCTTGTCCAAGTAA	-106	IP_peak_28830	chr7D	598315503	598315780	278	598315652	5.19	5.06307	6.85018	3.3933	Promoter (1-2kb)	chr7D	598317245	598319095	1851	1	+	TraesCS7D02G666100LC	TraesCS7D02G666100LC.1	-1593
WTTTYCTCYAAGTCC	MEME-3	chr2A	756495376	756495390	+	8.85366	5e-05	0.171	TATTCTTCTATGTAA	46	IP_peak_5107	chr2A	756494954	756495560	607	756495330	7.79	5.89569	7.26834	3.77083	Promoter (1-2kb)	chr2A	756487901	756494170	6270	4	-	TraesCS2A02G709300LC	TraesCS2A02G709300LC.1	-1160
WTTTYCTCYAAGTCC	MEME-3	chr5A	445246149	445246163	+	8.79268	5.11e-05	0.173	ATTTTATCTATGTTT	-39	IP_peak_17281	chr5A	445245993	445246439	447	445246202	11.25	8.21784	12.5877	8.45473	Promoter (1-2kb)	chr5A	445243877	445245106	1230	6	-	TraesCS5A02G230200	TraesCS5A02G230200.1	-1096
WTTTYCTCYAAGTCC	MEME-3	chr3B	572671791	572671805	-	8.79268	5.11e-05	0.173	TTTTTGTATAAGTTA	-84	IP_peak_10810	chr3B	572671677	572672129	453	572671889	11.25	9.66363	15.6574	11.3383	Promoter (1-2kb)	chr3B	572667833	572670681	2849	3	-	TraesCS3B02G360700	TraesCS3B02G360700.1	-1208
WTTTYCTCYAAGTCC	MEME-3	chr4B	617881763	617881777	+	8.79268	5.11e-05	0.173	TTTTTGTATAAGTTA	230	IP_peak_15388	chr4B	617881506	617881842	337	617881533	12.12	6.55758	10.1966	6.23501	Promoter (1-2kb)	chr4B	617876024	617880178	4155	3	-	TraesCS4B02G519800LC	TraesCS4B02G519800LC.1	-1355
WTTTYCTCYAAGTCC	MEME-3	chr6A	175628833	175628847	+	8.78049	5.13e-05	0.173	GTTCCTTCTAAGTAT	-26	IP_peak_21111	chr6A	175628618	175628898	281	175628873	5.19	5.06307	6.85018	3.3933	Promoter (<=1kb)	chr6A	175629314	175630158	845	1	+	TraesCS6A02G168600	TraesCS6A02G168600.1	-441
WTTTYCTCYAAGTCC	MEME-3	chr7B	501586545	501586559	-	8.78049	5.13e-05	0.173	AATTTTAAAAAGTCC	-121	IP_peak_26971	chr7B	501586338	501586839	502	501586680	10.38	3.79481	5.08049	1.98909	Promoter (1-2kb)	chr7B	501587726	501588376	651	1	+	TraesCS7B02G472100LC	TraesCS7B02G472100LC.1	-1046
WTTTYCTCYAAGTCC	MEME-3	chr7D	586488773	586488787	-	8.78049	5.13e-05	0.173	TGTTTTCCTAAGTTT	58	IP_peak_28786	chr7D	586488520	586488925	406	586488715	15.58	8.28831	13.7287	9.50863	Promoter (<=1kb)	chr7D	586489611	586493192	3582	10	+	TraesCS7D02G473300	TraesCS7D02G473300.1	-896
WTTTYCTCYAAGTCC	MEME-3	chr7B	723970193	723970207	+	8.78049	5.13e-05	0.173	TTTTTTTAAAAGTAC	-30	IP_peak_27486	chr7B	723970062	723970311	250	723970237	10.38	3.79481	5.08049	1.98909	Promoter (<=1kb)	chr7B	723970772	723971212	441	1	+	TraesCS7B02G782700LC	TraesCS7B02G782700LC.1	-535
WTTTYCTCYAAGTCC	MEME-3	chr7B	94263187	94263201	-	8.71951	5.25e-05	0.173	ACTTTGACTAAGTTT	75	IP_peak_26288	chr7B	94262962	94263268	307	94263112	4.33	4.56623	6.03134	2.69714	Promoter (<=1kb)	chr7B	94263778	94264915	1138	2	+	TraesCS7B02G083500	TraesCS7B02G083500.1	-666
WTTTYCTCYAAGTCC	MEME-3	chr5D	469275041	469275055	+	8.69512	5.3e-05	0.174	TTATTTTTCAAGTAT	-21	IP_peak_20385	chr5D	469274918	469275183	266	469275076	11.25	6.63062	9.88185	5.96176	Promoter (1-2kb)	chr5D	469276183	469276551	369	1	+	TraesCS5D02G495500LC	TraesCS5D02G495500LC.1	-1107
WTTTYCTCYAAGTCC	MEME-3	chr5B	270015985	270015999	+	8.68293	5.32e-05	0.174	AAATTTACTATGTTC	76	IP_peak_18455	chr5B	270015818	270016084	267	270015909	10.38	5.69221	7.99793	4.33317	Promoter (1-2kb)	chr5B	270010915	270014138	3224	2	-	TraesCS5B02G143100	TraesCS5B02G143100.1	-1771
WTTTYCTCYAAGTCC	MEME-3	chr1D	391984792	391984806	+	8.68293	5.32e-05	0.174	CTTTACCCTAAGTAT	60	IP_peak_3269	chr1D	391984659	391984881	223	391984732	5.19	5.30804	7.58964	3.97097	Promoter (<=1kb)	chr1D	391985083	391985701	619	2	+	TraesCS1D02G406700LC	TraesCS1D02G406700LC.1	-351
WTTTYCTCYAAGTCC	MEME-3	chr3D	569378629	569378643	-	8.65854	5.37e-05	0.174	ATTTTTATCAAGTAT	-55	IP_peak_12500	chr3D	569378508	569378808	301	569378698	7.79	6.93294	9.28856	5.40112	Promoter (<=1kb)	chr3D	569377348	569378352	1005	1	-	TraesCS3D02G565000LC	TraesCS3D02G565000LC.1	-346
WTTTYCTCYAAGTCC	MEME-3	chr7D	79529384	79529398	-	8.64634	5.39e-05	0.174	GTTTTCACCACGTTC	-17	IP_peak_27813	chr7D	79529000	79529557	558	79529415	11.25	4.08326	5.86499	2.65755	Promoter (<=1kb)	chr7D	79529808	79531899	2092	4	+	TraesCS7D02G158800LC	TraesCS7D02G158800LC.1	-393
WTTTYCTCYAAGTCC	MEME-3	chr1A	132262669	132262683	-	8.63415	5.41e-05	0.174	AATTTTTTCAAGTTT	-51	IP_peak_321	chr1A	132262395	132262941	547	132262734	7.79	6.27098	7.93129	4.28499	Promoter (1-2kb)	chr1A	132264139	132275003	10865	14	+	TraesCS1A02G119900	TraesCS1A02G119900.1	-1405
WTTTYCTCYAAGTCC	MEME-3	chrUn	337286750	337286764	-	8.62195	5.44e-05	0.174	TATTTTTCTATGTAA	-111	IP_peak_29353	chrUn	337286730	337287100	371	337286875	14.71	5.23709	8.41215	4.70692	Promoter (1-2kb)	chrUn	337288100	337288951	852	1	+	TraesCSU02G227700	TraesCSU02G227700.1	-1225
WTTTYCTCYAAGTCC	MEME-3	chr1A	564193882	564193896	-	8.62195	5.44e-05	0.174	TTTCCTACTAAGTAA	77	IP_peak_1172	chr1A	564193706	564193945	240	564193805	4.33	4.4364	5.63877	2.45371	Promoter (1-2kb)	chr1A	564195794	564196138	345	1	+	TraesCS1A02G569000LC	TraesCS1A02G569000LC.1	-1989
WTTTYCTCYAAGTCC	MEME-3	chr4A	100564642	100564656	+	8.60976	5.46e-05	0.174	TTTTATACTAAGTTA	-9	IP_peak_12932	chr4A	100564629	100564851	223	100564665	9.52	5.90775	7.94298	4.29632	Promoter (<=1kb)	chr4A	100559355	100564319	4965	10	-	TraesCS4A02G093000	TraesCS4A02G093000.1	-346
WTTTYCTCYAAGTCC	MEME-3	chr1B	641306011	641306025	+	8.60976	5.46e-05	0.174	TATTTTTTTATGTCT	14	IP_peak_2437	chr1B	641305916	641306510	595	641305997	12.98	6.60994	9.62777	5.72452	Promoter (1-2kb)	chr1B	641304348	641304749	402	1	-	TraesCS1B02G700500LC	TraesCS1B02G700500LC.1	-1248
WTTTYCTCYAAGTCC	MEME-3	chr3A	26579608	26579622	+	8.59756	5.48e-05	0.174	ACTTTGCCTAAGTTT	80	IP_peak_8266	chr3A	26579399	26579729	331	26579528	10.38	8.67569	13.2863	9.08334	Promoter (<=1kb)	chr3A	26578823	26579251	429	2	-	TraesCS3A02G050400	TraesCS3A02G050400.1	-277
WTTTYCTCYAAGTCC	MEME-3	chr1A	449805670	449805684	-	8.57317	5.53e-05	0.174	TCTTTTTTTAAGTCT	18	IP_peak_834	chr1A	449805012	449805823	812	449805652	10.38	5.69221	7.99793	4.33317	Promoter (<=1kb)	chr1A	449806236	449807231	996	1	+	TraesCS1A02G399100LC	TraesCS1A02G399100LC.1	-584
WTTTYCTCYAAGTCC	MEME-3	chr4A	612055392	612055406	-	8.56098	5.56e-05	0.174	ATATTGACTATGTAT	206	IP_peak_13953	chr4A	612055154	612055770	617	612055186	10.38	3.79481	5.08049	1.98909	Promoter (1-2kb)	chr4A	612056956	612057570	615	1	+	TraesCS4A02G483900LC	TraesCS4A02G483900LC.1	-1770
WTTTYCTCYAAGTCC	MEME-3	chr7A	701713710	701713724	-	8.56098	5.56e-05	0.174	TTTTCTATCAAGTTT	62	IP_peak_25941	chr7A	701713526	701713987	462	701713648	6.06	5.77064	8.34871	4.64755	Promoter (<=1kb)	chr7A	701708255	701713214	4960	7	-	TraesCS7A02G735600LC	TraesCS7A02G735600LC.1	-434
WTTTYCTCYAAGTCC	MEME-3	chr6D	52456337	52456351	+	8.54878	5.58e-05	0.174	AAATTCTCTAACTCC	38	IP_peak_23585	chr6D	52456202	52456447	246	52456299	13.85	6.34958	9.71042	5.80193	Promoter (1-2kb)	chr6D	52454114	52454361	248	2	-	TraesCS6D02G096500LC	TraesCS6D02G096500LC.1	-1938
WTTTYCTCYAAGTCC	MEME-3	chr3A	431826022	431826036	-	8.54878	5.58e-05	0.174	TTTTTGTCCAAATCT	47	IP_peak_8971	chr3A	431825959	431826288	330	431825975	8.65	4.82684	5.94877	2.69714	Promoter (<=1kb)	chr3A	431822161	431825498	3338	4	-	TraesCS3A02G231400	TraesCS3A02G231400.1	-477
WTTTYCTCYAAGTCC	MEME-3	chr3D	365328302	365328316	+	8.53659	5.6e-05	0.174	TGTTTGCCCAAGTTT	-94	IP_peak_12081	chr3D	365328258	365328507	250	365328410	12.98	5.02153	7.242	3.74666	Promoter (<=1kb)	chr3D	365329141	365331507	2367	6	+	TraesCS3D02G263200	TraesCS3D02G263200.1	-731
WTTTYCTCYAAGTCC	MEME-3	chr6B	598000814	598000828	-	8.53659	5.6e-05	0.174	CAATTTTCCAAGTTT	191	IP_peak_23094	chr6B	598000529	598000961	433	598000623	11.25	6.12489	9.08008	5.30512	Promoter (1-2kb)	chr6B	597997390	597998849	1460	2	-	TraesCS6B02G617300LC	TraesCS6B02G617300LC.1	-1774
WTTTYCTCYAAGTCC	MEME-3	chr4B	28546172	28546186	-	8.5122	5.65e-05	0.174	AAATTTTATAAGTAT	2	IP_peak_14380	chr4B	28546106	28546391	286	28546170	11.25	5.79166	8.55828	4.84154	Promoter (1-2kb)	chr4B	28542817	28544626	1810	3	-	TraesCS4B02G041400	TraesCS4B02G041400.1	-1544
WTTTYCTCYAAGTCC	MEME-3	chr7B	138750168	138750182	-	8.5	5.68e-05	0.174	TTATTGACCATGTAT	20	IP_peak_26391	chr7B	138750056	138750326	271	138750148	6.92	5.4791	6.32584	2.93935	Promoter (1-2kb)	chr7B	138741905	138748436	6532	7	-	TraesCS7B02G119300	TraesCS7B02G119300.5	-1712
WTTTYCTCYAAGTCC	MEME-3	chr2D	589253635	589253649	-	8.5	5.68e-05	0.174	ATTTTCAATAAGTAA	-148	IP_peak_8054	chr2D	589253576	589253869	294	589253797	11.25	4.78301	6.98213	3.4955	Promoter (1-2kb)	chr2D	589248071	589252737	4667	4	-	TraesCS2D02G604800LC	TraesCS2D02G604800LC.1	-1060
WTTTYCTCYAAGTCC	MEME-3	chr6B	56423957	56423971	-	8.4878	5.7e-05	0.174	TTTTTTTCAAAGTTA	177	IP_peak_22224	chr6B	56423615	56424136	522	56423780	12.12	6.55758	10.1966	6.23501	Promoter (1-2kb)	chr6B	56425394	56425708	315	1	+	TraesCS6B02G108900LC	TraesCS6B02G108900LC.1	-1614
WTTTYCTCYAAGTCC	MEME-3	chrUn	95981133	95981147	+	8.4878	5.7e-05	0.174	ATTTCATATAAGTTT	-34	IP_peak_29201	chrUn	95980759	95981367	609	95981181	7.79	6.69728	8.77014	5.03769	Promoter (1-2kb)	chrUn	95982716	95984482	1767	3	+	TraesCSU02G111500	TraesCSU02G111500.1	-1535
WTTTYCTCYAAGTCC	MEME-3	chr2B	164935642	164935656	+	8.4878	5.7e-05	0.174	TTTTCCACTAGGTCT	-173	IP_peak_5634	chr2B	164935633	164936159	527	164935829	9.52	6.85175	9.48519	5.59069	Promoter (<=1kb)	chr2B	164936501	164940359	3859	5	+	TraesCS2B02G189300	TraesCS2B02G189300.1	-672
WTTTYCTCYAAGTCC	MEME-3	chr3A	703305290	703305304	-	8.47561	5.73e-05	0.174	AAAATTTTCAAGTCC	-11	IP_peak_9624	chr3A	703305269	703305663	395	703305315	10.38	4.86911	6.74011	3.30472	Promoter (<=1kb)	chr3A	703302913	703304334	1422	1	-	TraesCS3A02G472100	TraesCS3A02G472100.1	-981
WTTTYCTCYAAGTCC	MEME-3	chr1B	374008210	374008224	+	8.46341	5.75e-05	0.174	TATATTACCATGTCT	-13	IP_peak_1889	chr1B	374007986	374008248	263	374008237	6.06	4.88066	6.32584	2.93935	Promoter (<=1kb)	chr1B	374006679	374007289	611	2	-	TraesCS1B02G393600LC	TraesCS1B02G393600LC.1	-948
WTTTYCTCYAAGTCC	MEME-3	chr2B	55856798	55856812	+	8.45122	5.78e-05	0.174	TTTTATTCAAAGTAT	-175	IP_peak_5413	chr2B	55856712	55857138	427	55856987	12.98	6.901	10.0627	6.13111	Promoter (1-2kb)	chr2B	55853698	55855871	2174	3	-	TraesCS2B02G118700LC	TraesCS2B02G118700LC.1	-1116
WTTTYCTCYAAGTCC	MEME-3	chrUn	95397123	95397137	-	8.45122	5.78e-05	0.174	TTTTATTCAAAGTAT	-106	IP_peak_29199	chrUn	95397048	95397354	307	95397243	12.12	3.27879	4.79185	1.75235	Promoter (<=1kb)	chrUn	95394879	95396725	1847	2	-	TraesCSU02G110300	TraesCSU02G110300.1	-518
WTTTYCTCYAAGTCC	MEME-3	chr3D	588111181	588111195	-	8.45122	5.78e-05	0.174	TTTTTTTTTACGTAC	56	IP_peak_12588	chr3D	588110987	588111410	424	588111125	12.12	5.60935	8.68779	4.96	Promoter (1-2kb)	chr3D	588109400	588110049	650	2	-	TraesCS3D02G496400	TraesCS3D02G496400.1	-1076
WTTTYCTCYAAGTCC	MEME-3	chr3D	8562952	8562966	+	8.42683	5.83e-05	0.174	TTTTCGTATATGTCA	-205	IP_peak_11449	chr3D	8562822	8563287	466	8563171	10.38	5.74603	8.08087	4.41194	Promoter (1-2kb)	chr3D	8564460	8573804	9345	2	+	TraesCS3D02G025300	TraesCS3D02G025300.1	-1289
WTTTYCTCYAAGTCC	MEME-3	chr4D	9066907	9066921	+	8.42683	5.83e-05	0.174	AATTTGTTTATGTCT	158	IP_peak_15597	chr4D	9066383	9067194	812	9066749	12.98	8.05353	11.8215	7.72555	Promoter (<=1kb)	chr4D	9065120	9065965	846	1	-	TraesCS4D02G013200LC	TraesCS4D02G013200LC.1	-784
WTTTYCTCYAAGTCC	MEME-3	chr4D	22571071	22571085	+	8.42683	5.83e-05	0.174	TTTTCGTATATGTCA	-158	IP_peak_15635	chr4D	22570892	22571504	613	22571243	15.58	9.93181	16.3865	12.0064	Promoter (<=1kb)	chr4D	22571833	22575365	3533	7	+	TraesCS4D02G047000	TraesCS4D02G047000.1	-590
WTTTYCTCYAAGTCC	MEME-3	chr3A	362905811	362905825	-	8.42683	5.83e-05	0.174	TTTTCGTATATGTCA	69	IP_peak_8851	chr3A	362905197	362905866	670	362905742	8.65	4.56423	5.56755	2.38831	Promoter (<=1kb)	chr3A	362904655	362905035	381	1	-	TraesCS3A02G313400LC	TraesCS3A02G313400LC.1	-707
WTTTYCTCYAAGTCC	MEME-3	chr1A	57392482	57392496	+	8.40244	5.88e-05	0.174	ACTTTGACCAAGTTT	51	IP_peak_162	chr1A	57392302	57392570	269	57392431	6.06	6.04984	9.21445	5.3363	Promoter (<=1kb)	chr1A	57390211	57392165	1955	1	-	TraesCS1A02G073500	TraesCS1A02G073500.1	-266
WTTTYCTCYAAGTCC	MEME-3	chr2B	95097755	95097769	-	8.40244	5.88e-05	0.174	AGTTTGACCAAGTTT	-39	IP_peak_5500	chr2B	95097665	95097903	239	95097808	6.06	5.37835	7.35958	3.85322	Promoter (<=1kb)	chr2B	95095839	95097092	1254	1	-	TraesCS2B02G126905	TraesCS2B02G126905.1	-716
WTTTYCTCYAAGTCC	MEME-3	chr5B	319319360	319319374	-	8.40244	5.88e-05	0.174	ACTTTGACCAAGTTT	-114	IP_peak_18547	chr5B	319319255	319319885	631	319319488	7.79	7.45776	10.6629	6.6728	Promoter (1-2kb)	chr5B	319317544	319318065	522	1	-	TraesCS5B02G289800LC	TraesCS5B02G289800LC.1	-1423
WTTTYCTCYAAGTCC	MEME-3	chr5D	441393572	441393586	+	8.40244	5.88e-05	0.174	AATTTCATTAAGTTT	-103	IP_peak_20307	chr5D	441393549	441393842	294	441393689	9.52	5.98268	8.06012	4.39408	Promoter (1-2kb)	chr5D	441390738	441392352	1615	1	-	TraesCS5D02G455410LC	TraesCS5D02G455410LC.1	-1337
WTTTYCTCYAAGTCC	MEME-3	chr5B	458902938	458902952	+	8.40244	5.88e-05	0.174	ATTTTCTTCAAGTTA	71	IP_peak_18848	chr5B	458902799	458903053	255	458902867	9.52	3.50635	4.33257	1.47231	Promoter (<=1kb)	chr5B	458903525	458906513	2989	5	+	TraesCS5B02G273700	TraesCS5B02G273700.1	-658
WTTTYCTCYAAGTCC	MEME-3	chr1A	496643542	496643556	-	8.40244	5.88e-05	0.174	CATTTCTTCAAGTAC	63	IP_peak_967	chr1A	496643301	496643599	299	496643479	11.25	5.79166	8.55828	4.84154	Promoter (1-2kb)	chr1A	496645160	496646178	1019	1	+	TraesCS1A02G303200	TraesCS1A02G303200.1	-1681
WTTTYCTCYAAGTCC	MEME-3	chr7B	582267785	582267799	+	8.40244	5.88e-05	0.174	AGTTTGACCAAGTTT	-81	IP_peak_27121	chr7B	582267734	582267987	254	582267880	5.19	5.25471	7.4151	3.8892	Promoter (1-2kb)	chr7B	582269251	582269724	474	1	+	TraesCS7B02G548400LC	TraesCS7B02G548400LC.1	-1371
WTTTYCTCYAAGTCC	MEME-3	chr5B	690260004	690260018	+	8.40244	5.88e-05	0.174	AGTTTGACCAAGTTT	0	IP_peak_19325	chr5B	690259789	690260181	393	690260011	7.79	7.18578	9.90484	5.97593	Promoter (<=1kb)	chr5B	690260279	690263130	2852	6	+	TraesCS5B02G533600	TraesCS5B02G533600.1	-268
WTTTYCTCYAAGTCC	MEME-3	chr3A	714293700	714293714	+	8.40244	5.88e-05	0.174	AGTTTGACCAAGTTT	-81	IP_peak_9665	chr3A	714293683	714293922	240	714293795	7.79	6.81307	9.01904	5.25929	Promoter (1-2kb)	chr3A	714289919	714291827	1909	5	-	TraesCS3A02G484600	TraesCS3A02G484600.1	-1968
WTTTYCTCYAAGTCC	MEME-3	chr3A	724309783	724309797	+	8.40244	5.88e-05	0.174	ACTTTGACCAAGTTT	160	IP_peak_9714	chr3A	724309488	724309892	405	724309623	5.19	4.88492	6.39162	2.99006	Promoter (<=1kb)	chr3A	724310423	724310833	411	3	+	TraesCS3A02G675200LC	TraesCS3A02G675200LC.1	-800
WTTTYCTCYAAGTCC	MEME-3	chr3B	782428581	782428595	+	8.40244	5.88e-05	0.174	ACTTTGACCAAGTTT	-58	IP_peak_11243	chr3B	782428523	782428912	390	782428653	6.06	4.73462	6.05293	2.71147	Promoter (1-2kb)	chr3B	782429931	782430407	477	1	+	TraesCS3B02G805200LC	TraesCS3B02G805200LC.1	-1278
WTTTYCTCYAAGTCC	MEME-3	chr5D	547073381	547073395	-	8.39024	5.91e-05	0.174	TTTTAGAATAAGTTC	-118	IP_peak_20614	chr5D	547073241	547073611	371	547073513	11.25	5.79166	8.55828	4.84154	Promoter (1-2kb)	chr5D	547075308	547075544	237	1	+	TraesCS5D02G625900LC	TraesCS5D02G625900LC.1	-1795
WTTTYCTCYAAGTCC	MEME-3	chr7B	597245826	597245840	-	8.37805	5.93e-05	0.174	AATTCTAATAAGTTT	72	IP_peak_27152	chr7B	597245391	597245927	537	597245754	12.12	9.66607	15.7562	11.4349	Promoter (<=1kb)	chr7B	597246265	597247731	1467	1	+	TraesCS7B02G571700LC	TraesCS7B02G571700LC.1	-511
WTTTYCTCYAAGTCC	MEME-3	chr1A	521229343	521229357	+	8.36585	5.96e-05	0.174	AATTTTTCTATGTAA	163	IP_peak_1039	chr1A	521228988	521229382	395	521229180	8.65	6.67599	8.88947	5.14526	Promoter (1-2kb)	chr1A	521231154	521232716	1563	2	+	TraesCS1A02G488110LC	TraesCS1A02G488110LC.1	-1974
WTTTYCTCYAAGTCC	MEME-3	chr6B	604221485	604221499	-	8.36585	5.96e-05	0.174	AAACTTTTCAAGTCC	119	IP_peak_23114	chr6B	604221254	604221510	257	604221366	6.92	6.79165	9.21445	5.3363	Promoter (<=1kb)	chr6B	604212469	604220915	8447	19	-	TraesCS6B02G343300	TraesCS6B02G343300.2	-451
WTTTYCTCYAAGTCC	MEME-3	chr2A	714647092	714647106	-	8.36585	5.96e-05	0.174	ATATTCACAAAGTTT	26	IP_peak_4966	chr2A	714646782	714647217	436	714647066	8.65	4.82684	5.94877	2.69714	Promoter (<=1kb)	chr2A	714642745	714646131	3387	2	-	TraesCS2A02G632100LC	TraesCS2A02G632100LC.1	-935
WTTTYCTCYAAGTCC	MEME-3	chr1A	483919028	483919042	+	8.32927	6.04e-05	0.174	ATTTTCTAAAAGTCA	134	IP_peak_925	chr1A	483918674	483919406	733	483918894	11.25	10.5007	18.0879	13.6263	Promoter (1-2kb)	chr1A	483920343	483924559	4217	6	+	TraesCS1A02G287100	TraesCS1A02G287100.1	-1449
WTTTYCTCYAAGTCC	MEME-3	chr1A	35137957	35137971	-	8.31707	6.06e-05	0.174	ATTTTTTTTATGTAC	-16	IP_peak_118	chr1A	35137602	35138212	611	35137987	10.38	5.21747	7.27113	3.77349	Promoter (1-2kb)	chr1A	35136369	35136689	321	1	-	TraesCS1A02G075800LC	TraesCS1A02G075800LC.1	-1298
WTTTYCTCYAAGTCC	MEME-3	chr7B	191726457	191726471	+	8.30488	6.08e-05	0.174	AATTCTTATATGTAC	-59	IP_peak_26469	chr7B	191726437	191726663	227	191726530	8.65	7.89335	11.5118	7.43095	Promoter (<=1kb)	chr7B	191727502	191729246	1745	2	+	TraesCS7B02G146600	TraesCS7B02G146600.1	-972
WTTTYCTCYAAGTCC	MEME-3	chr2D	498453762	498453776	-	8.28049	6.14e-05	0.174	TTATTGAATAAGTAT	123	IP_peak_7870	chr2D	498453566	498453789	224	498453639	4.33	4.56623	6.03134	2.69714	Promoter (<=1kb)	chr2D	498454110	498462762	8653	3	+	TraesCS2D02G498100LC	TraesCS2D02G498100LC.1	-471
WTTTYCTCYAAGTCC	MEME-3	chr4A	548785388	548785402	-	8.28049	6.14e-05	0.174	TTTTTATCAAAGTTT	-31	IP_peak_13791	chr4A	548785322	548785574	253	548785433	8.65	6.57459	8.70744	4.97878	Promoter (<=1kb)	chr4A	548786022	548786279	258	1	+	TraesCS4A02G391700LC	TraesCS4A02G391700LC.1	-589
WTTTYCTCYAAGTCC	MEME-3	chr2B	190029238	190029252	+	8.26829	6.16e-05	0.174	TTTTTGTAAAAGTTC	-158	IP_peak_5685	chr2B	190029126	190029534	409	190029410	11.25	10.5007	18.0879	13.6263	Promoter (<=1kb)	chr2B	190030047	190030551	505	2	+	TraesCS2B02G285400LC	TraesCS2B02G285400LC.1	-637
WTTTYCTCYAAGTCC	MEME-3	chr2A	115093360	115093374	-	8.2561	6.19e-05	0.174	TTTTTTGAAAAGTCT	-166	IP_peak_3933	chr2A	115093236	115093600	365	115093540	9.52	5.25952	6.95302	3.47631	Promoter (1-2kb)	chr2A	115094760	115096079	1320	1	+	TraesCS2A02G162500	TraesCS2A02G162500.1	-1220
WTTTYCTCYAAGTCC	MEME-3	chr2D	372942	372956	+	8.2439	6.22e-05	0.174	ATATTGACCATGTAT	-35	IP_peak_6854	chr2D	372770	373115	346	372991	7.79	6.69728	8.77014	5.03769	Promoter (1-2kb)	chr2D	370037	371169	1133	3	-	TraesCS2D02G000700	TraesCS2D02G000700.1	-1822
WTTTYCTCYAAGTCC	MEME-3	chr6D	13586664	13586678	-	8.2439	6.22e-05	0.174	ATATTGACCATGTAT	-122	IP_peak_23456	chr6D	13586607	13586980	374	13586800	8.65	4.82684	5.94877	2.69714	Promoter (<=1kb)	chr6D	13587312	13591927	4616	9	+	TraesCS6D02G032200	TraesCS6D02G032200.1	-512
WTTTYCTCYAAGTCC	MEME-3	chr5B	43981218	43981232	-	8.2439	6.22e-05	0.174	CTTTGTTCTAAGTCA	-76	IP_peak_18108	chr5B	43981184	43981416	233	43981308	4.33	4.3555	5.41801	2.24976	Promoter (1-2kb)	chr5B	43978891	43979574	684	3	-	TraesCS5B02G063100LC	TraesCS5B02G063100LC.1	-1734
WTTTYCTCYAAGTCC	MEME-3	chr4D	45706625	45706639	-	8.2439	6.22e-05	0.174	ATATTGACCATGTAT	-108	IP_peak_15682	chr4D	45706610	45706876	267	45706747	14.71	5.23709	8.41215	4.70692	Promoter (1-2kb)	chr4D	45699317	45705080	5764	5	-	TraesCS4D02G070400	TraesCS4D02G070400.2	-1667
WTTTYCTCYAAGTCC	MEME-3	chr5A	415318833	415318847	-	8.2439	6.22e-05	0.174	ATATTGACCATGTAT	124	IP_peak_17222	chr5A	415318542	415319190	649	415318709	9.52	7.27444	10.2419	6.26689	Promoter (1-2kb)	chr5A	415320445	415322718	2274	1	+	TraesCS5A02G205500	TraesCS5A02G205500.1	-1736
WTTTYCTCYAAGTCC	MEME-3	chr2D	474894578	474894592	-	8.2439	6.22e-05	0.174	ATATTGACCATGTAT	51	IP_peak_7804	chr2D	474894393	474894883	491	474894527	14.71	3.92781	6.17368	2.8277	Promoter (<=1kb)	chr2D	474890205	474893733	3529	4	-	TraesCS2D02G370700	TraesCS2D02G370700.1	-794
WTTTYCTCYAAGTCC	MEME-3	chr4D	488707385	488707399	+	8.2439	6.22e-05	0.174	ATATTGACCATGTAT	113	IP_peak_16383	chr4D	488706826	488707628	803	488707272	10.38	6.16221	8.72829	4.99882	Promoter (1-2kb)	chr4D	488708834	488710514	1681	4	+	TraesCS4D02G330700	TraesCS4D02G330700.1	-1562
WTTTYCTCYAAGTCC	MEME-3	chr4A	552414123	552414137	+	8.2439	6.22e-05	0.174	ATATTGACCATGTAT	-108	IP_peak_13802	chr4A	552414117	552414353	237	552414245	10.38	3.79481	5.08049	1.98909	Promoter (<=1kb)	chr4A	552409869	552413671	3803	3	-	TraesCS4A02G242500	TraesCS4A02G242500.1	-574
WTTTYCTCYAAGTCC	MEME-3	chr3B	675256679	675256693	-	8.2439	6.22e-05	0.174	ATATTGACCATGTAT	103	IP_peak_10992	chr3B	675256421	675256988	568	675256576	10.38	8.39049	12.6661	8.49512	Promoter (<=1kb)	chr3B	675257503	675258159	657	1	+	TraesCS3B02G633700LC	TraesCS3B02G633700LC.1	-927
WTTTYCTCYAAGTCC	MEME-3	chr4A	741818144	741818158	+	8.2439	6.22e-05	0.174	ATATTGACCATGTAT	-14	IP_peak_14295	chr4A	741818132	741818364	233	741818172	11.25	4.39988	6.37473	2.98197	Promoter (1-2kb)	chr4A	741819712	741820330	619	2	+	TraesCS4A02G736600LC	TraesCS4A02G736600LC.1	-1540
WTTTYCTCYAAGTCC	MEME-3	chr6D	23397062	23397076	+	8.23171	6.25e-05	0.174	TTTTTCAAAAAGTAC	118	IP_peak_23499	chr6D	23396707	23397085	379	23396944	6.92	5.16074	5.80523	2.60873	Promoter (1-2kb)	chr6D	23398270	23415334	17065	2	+	TraesCS6D02G048500	TraesCS6D02G048500.1	-1326
WTTTYCTCYAAGTCC	MEME-3	chr2D	50102575	50102589	-	8.21951	6.27e-05	0.174	TTTTCTTTTATGTTC	-102	IP_peak_7060	chr2D	50102526	50102998	473	50102691	12.12	4.37172	6.6833	3.25404	Promoter (<=1kb)	chr2D	50103204	50106109	2906	8	+	TraesCS2D02G097900	TraesCS2D02G097900.1	-513
WTTTYCTCYAAGTCC	MEME-3	chr4D	359127164	359127178	-	8.21951	6.27e-05	0.174	ATTTTTTCCAATTCT	0	IP_peak_16081	chr4D	359127026	359127606	581	359127165	9.52	7.27444	10.2419	6.26689	Promoter (1-2kb)	chr4D	359121666	359126096	4431	5	-	TraesCS4D02G208500	TraesCS4D02G208500.1	-1069
WTTTYCTCYAAGTCC	MEME-3	chr6D	413980947	413980961	-	8.21951	6.27e-05	0.174	ATTTTTTCCAAATCT	-35	IP_peak_24163	chr6D	413980750	413981477	728	413980996	19.9	10.4517	18.7993	14.3011	Promoter (<=1kb)	chr6D	413973587	413980496	6910	21	-	TraesCS6D02G304800	TraesCS6D02G304800.1	-500
WTTTYCTCYAAGTCC	MEME-3	chr2D	523311848	523311862	+	8.21951	6.27e-05	0.174	ATTTTTTCCAAATCT	-129	IP_peak_7917	chr2D	523311411	523312004	594	523311991	9.52	4.10723	5.23789	2.10599	Promoter (<=1kb)	chr2D	523312736	523313065	330	1	+	TraesCS2D02G516310LC	TraesCS2D02G516310LC.1	-745
WTTTYCTCYAAGTCC	MEME-3	chr6B	690881762	690881776	-	8.21951	6.27e-05	0.174	ATTTTTTCCAATTCT	8	IP_peak_23307	chr6B	690881652	690881876	225	690881754	10.38	6.82092	9.78691	5.87046	Promoter (1-2kb)	chr6B	690877405	690880548	3144	5	-	TraesCS6B02G752810LC	TraesCS6B02G752810LC.1	-1206
WTTTYCTCYAAGTCC	MEME-3	chr7A	167280882	167280896	+	8.20732	6.3e-05	0.174	TTTTTTTATAAGTAG	-117	IP_peak_24865	chr7A	167280862	167281148	287	167281013	7.79	7.53345	10.897	6.85299	Promoter (<=1kb)	chr7A	167272951	167280750	7800	11	-	TraesCS7A02G205300	TraesCS7A02G205300.1	-263
WTTTYCTCYAAGTCC	MEME-3	chr1A	354188103	354188117	+	8.20732	6.3e-05	0.174	TTTCTCTACAAGTTT	56	IP_peak_664	chr1A	354187711	354188249	539	354188047	7.79	6.69728	8.77014	5.03769	Promoter (1-2kb)	chr1A	354189074	354191293	2220	3	+	TraesCS1A02G196000	TraesCS1A02G196000.1	-1027
WTTTYCTCYAAGTCC	MEME-3	chr1B	28762441	28762455	+	8.19512	6.33e-05	0.174	TTTTTCTATATGTTT	112	IP_peak_1355	chr1B	28762239	28762479	241	28762329	10.38	7.63731	11.1978	7.14131	Promoter (<=1kb)	chr1B	28762792	28763678	887	2	+	TraesCS1B02G049100	TraesCS1B02G049100.1	-463
WTTTYCTCYAAGTCC	MEME-3	chr2A	35397936	35397950	-	8.19512	6.33e-05	0.174	TTTTTCTATATGTTT	-1	IP_peak_3744	chr2A	35397828	35398105	278	35397951	5.19	3.8119	4.31549	1.46273	Promoter (1-2kb)	chr2A	35399372	35401157	1786	7	+	TraesCS2A02G077200	TraesCS2A02G077200.1	-1421
WTTTYCTCYAAGTCC	MEME-3	chr5D	54679172	54679186	-	8.19512	6.33e-05	0.174	ATTTTCTTAAAGTTC	123	IP_peak_19583	chr5D	54678753	54679217	465	54679049	6.92	6.47821	8.34871	4.64755	Promoter (1-2kb)	chr5D	54680380	54683861	3482	7	+	TraesCS5D02G057800	TraesCS5D02G057800.1	-1331
WTTTYCTCYAAGTCC	MEME-3	chr7D	349944991	349945005	+	8.19512	6.33e-05	0.174	TTTTTATACAAGTTT	-58	IP_peak_28274	chr7D	349944878	349945228	351	349945063	10.38	7.41542	10.7999	6.79871	Promoter (<=1kb)	chr7D	349945395	349947784	2390	5	+	TraesCS7D02G291300	TraesCS7D02G291300.1	-332
WTTTYCTCYAAGTCC	MEME-3	chr5A	450550807	450550821	+	8.19512	6.33e-05	0.174	TTTTTGTATATGTCA	45	IP_peak_17302	chr5A	450550613	450551309	697	450550762	14.71	12.8463	21.9823	17.3017	Promoter (<=1kb)	chr5A	450551531	450557166	5636	10	+	TraesCS5A02G234400	TraesCS5A02G234400.1	-769
WTTTYCTCYAAGTCC	MEME-3	chr2B	714520051	714520065	+	8.19512	6.33e-05	0.174	TTTTTATACAAGTTT	70	IP_peak_6645	chr2B	714519882	714520328	447	714519981	8.65	5.94277	7.6437	4.02266	Promoter (<=1kb)	chr2B	714518392	714519300	909	1	-	TraesCS2B02G519800	TraesCS2B02G519800.1	-681
WTTTYCTCYAAGTCC	MEME-3	chr2A	561007106	561007120	+	8.18293	6.35e-05	0.174	AAATTCACCATGTAT	0	IP_peak_4625	chr2A	561006956	561007221	266	561007118	16.44	6.81034	11.9015	7.80212	Promoter (1-2kb)	chr2A	561008585	561009871	1287	1	+	TraesCS2A02G328900	TraesCS2A02G328900.1	-1467
WTTTYCTCYAAGTCC	MEME-3	chr2D	405630745	405630759	-	8.17073	6.38e-05	0.174	ATATTTTTTAAGTTT	38	IP_peak_7683	chr2D	405630586	405630835	250	405630707	12.98	5.97947	8.68779	4.96	Promoter (<=1kb)	chr2D	405630983	405631282	300	1	+	TraesCS2D02G410300LC	TraesCS2D02G410300LC.1	-276
WTTTYCTCYAAGTCC	MEME-3	chr5B	45540189	45540203	-	8.15854	6.4e-05	0.174	TTTTTTTCTATGTTG	8	IP_peak_18109	chr5B	45540129	45540394	266	45540181	8.65	6.67599	8.88947	5.14526	Promoter (<=1kb)	chr5B	45538417	45539617	1201	3	-	TraesCS5B02G041400	TraesCS5B02G041400.2	-564
WTTTYCTCYAAGTCC	MEME-3	chr7A	705564187	705564201	+	8.14634	6.43e-05	0.175	AACTCAACTAAGTAC	122	IP_peak_25946	chr7A	705564042	705564278	237	705564065	4.33	4.3555	5.41801	2.24976	Promoter (<=1kb)	chr7A	705564251	705591330	27080	2	+	TraesCS7A02G742300LC	TraesCS7A02G742300LC.1	-186
WTTTYCTCYAAGTCC	MEME-3	chr2B	40065581	40065595	-	8.10976	6.52e-05	0.175	TTTTCGTACATGTCA	37	IP_peak_5365	chr2B	40065418	40065649	232	40065544	10.38	5.69221	7.99793	4.33317	Promoter (<=1kb)	chr2B	40065920	40070672	4753	6	+	TraesCS2B02G074100	TraesCS2B02G074100.1	-376
WTTTYCTCYAAGTCC	MEME-3	chr2B	453182399	453182413	+	8.10976	6.52e-05	0.175	AAAAACTCTACGTCC	99	IP_peak_6132	chr2B	453182281	453182518	238	453182300	6.06	4.22851	5.17727	2.0496	Promoter (1-2kb)	chr2B	453184096	453185410	1315	1	+	TraesCS2B02G498400LC	TraesCS2B02G498400LC.1	-1796
WTTTYCTCYAAGTCC	MEME-3	chr2D	560459609	560459623	-	8.10976	6.52e-05	0.175	TTTTCCTACATGTTT	-56	IP_peak_8000	chr2D	560459135	560459703	569	560459679	12.98	3.49513	4.79185	1.75235	Promoter (<=1kb)	chr2D	560460491	560460970	480	1	+	TraesCS2D02G559300LC	TraesCS2D02G559300LC.1	-812
WTTTYCTCYAAGTCC	MEME-3	chr6B	113448989	113449003	-	8.09756	6.55e-05	0.175	TCATCTCCCATGTCC	186	IP_peak_22322	chr6B	113448771	113449300	530	113448803	8.65	4.82684	5.94877	2.69714	Promoter (<=1kb)	chr6B	113445571	113448280	2710	4	-	TraesCS6B02G118500	TraesCS6B02G118500.2	-523
WTTTYCTCYAAGTCC	MEME-3	chr5A	31086180	31086194	-	8.08537	6.57e-05	0.175	AAATATACCAAGTAT	-54	IP_peak_16580	chr5A	31086157	31086446	290	31086248	5.19	4.56375	5.67501	2.48554	Promoter (<=1kb)	chr5A	31085323	31085673	351	1	-	TraesCS5A02G048000LC	TraesCS5A02G048000LC.1	-575
WTTTYCTCYAAGTCC	MEME-3	chr1D	321711619	321711633	-	8.08537	6.57e-05	0.175	ATAATGTTTAAGTCT	113	IP_peak_3136	chr1D	321711051	321711638	588	321711506	6.92	6.72341	9.01018	5.25107	Promoter (<=1kb)	chr1D	321710143	321710601	459	1	-	TraesCS1D02G233300	TraesCS1D02G233300.1	-905
WTTTYCTCYAAGTCC	MEME-3	chr7D	54586784	54586798	+	8.07317	6.6e-05	0.175	TTTTTGTATACGTCA	-13	IP_peak_27760	chr7D	54586343	54586913	571	54586811	9.52	4.97337	6.52502	3.11372	Promoter (1-2kb)	chr7D	54575995	54585199	9205	4	-	TraesCS7D02G117100LC	TraesCS7D02G117100LC.1	-1612
WTTTYCTCYAAGTCC	MEME-3	chr1D	306224200	306224214	-	8.07317	6.6e-05	0.175	TTTTTGTATACGTCA	13	IP_peak_3114	chr1D	306224153	306224490	338	306224187	9.52	3.50635	4.33257	1.47231	Promoter (1-2kb)	chr1D	306226109	306226330	222	1	+	TraesCS1D02G325200LC	TraesCS1D02G325200LC.1	-1922
WTTTYCTCYAAGTCC	MEME-3	chr7D	370465171	370465185	-	8.06098	6.62e-05	0.175	AAATCTGACAAGTTC	0	IP_peak_28306	chr7D	370465043	370465284	242	370465180	5.19	5.30804	7.58964	3.97097	Promoter (1-2kb)	chr7D	370462596	370464155	1560	2	-	TraesCS7D02G295500	TraesCS7D02G295500.1	-1025
WTTTYCTCYAAGTCC	MEME-3	chr5A	400865413	400865427	-	8.06098	6.62e-05	0.175	AAATTCACCACGTAT	-64	IP_peak_17195	chr5A	400865372	400865701	330	400865491	7.79	7.53345	10.897	6.85299	Promoter (1-2kb)	chr5A	400866703	400879323	12621	10	+	TraesCS5A02G197100	TraesCS5A02G197100.1	-1212
WTTTYCTCYAAGTCC	MEME-3	chr2B	514552992	514553006	-	8.06098	6.62e-05	0.175	AAATCTGACAAGTTC	-91	IP_peak_6252	chr2B	514552963	514553320	358	514553097	4.33	4.56623	6.03134	2.69714	Promoter (1-2kb)	chr2B	514550192	514552050	1859	2	-	TraesCS2B02G361500	TraesCS2B02G361500.1	-1047
WTTTYCTCYAAGTCC	MEME-3	chr2A	61297284	61297298	-	8.03659	6.68e-05	0.175	CATTTCTCAAAGTCA	30	IP_peak_3818	chr2A	61297134	61297362	229	61297254	17.31	6.10245	11.2084	7.14904	Promoter (1-2kb)	chr2A	61295311	61295976	666	1	-	TraesCS2A02G109200	TraesCS2A02G109200.1	-1278
WTTTYCTCYAAGTCC	MEME-3	chr1B	28565668	28565682	+	8.02439	6.71e-05	0.175	ATATTGAATAAGTAT	39	IP_peak_1353	chr1B	28565470	28566292	823	28565629	10.38	5.69221	7.99793	4.33317	Promoter (<=1kb)	chr1B	28561964	28564707	2744	4	-	TraesCS1B02G048800	TraesCS1B02G048800.1	-922
WTTTYCTCYAAGTCC	MEME-3	chr1B	46546505	46546519	+	8.02439	6.71e-05	0.175	ATATTGAATAAGTAT	-112	IP_peak_1400	chr1B	46546472	46546957	486	46546631	11.25	5.79166	8.55828	4.84154	Promoter (1-2kb)	chr1B	46547881	46551558	3678	6	+	TraesCS1B02G061500	TraesCS1B02G061500.1	-1250
WTTTYCTCYAAGTCC	MEME-3	chr2D	87749658	87749672	+	8.02439	6.71e-05	0.175	ATATTGAATAAGTAT	69	IP_peak_7159	chr2D	87749462	87749897	436	87749589	9.52	5.25952	6.95302	3.47631	Promoter (<=1kb)	chr2D	87747171	87749274	2104	4	-	TraesCS2D02G146000	TraesCS2D02G146000.1	-315
WTTTYCTCYAAGTCC	MEME-3	chr2A	87893913	87893927	+	8.02439	6.71e-05	0.175	ATATTGAATAAGTAT	64	IP_peak_3861	chr2A	87893706	87894185	480	87893849	13.85	4.94863	7.53305	3.97097	Promoter (1-2kb)	chr2A	87891227	87892366	1140	3	-	TraesCS2A02G142700	TraesCS2A02G142700.1	-1483
WTTTYCTCYAAGTCC	MEME-3	chr7A	198206795	198206809	+	8.02439	6.71e-05	0.175	ATTTATTTTAAGTCA	54	IP_peak_24926	chr7A	198206741	198207175	435	198206741	9.52	3.50635	4.33257	1.47231	Promoter (1-2kb)	chr7A	198207902	198208445	544	1	+	TraesCS7A02G292300LC	TraesCS7A02G292300LC.1	-1161
WTTTYCTCYAAGTCC	MEME-3	chr5D	390703083	390703097	+	8.02439	6.71e-05	0.175	ATATTGAATAAGTAT	0	IP_peak_20161	chr5D	390702903	390703667	765	390703090	11.25	8.74094	13.5978	9.38981	Promoter (1-2kb)	chr5D	390704238	390708633	4396	6	+	TraesCS5D02G294000	TraesCS5D02G294000.1	-1148
WTTTYCTCYAAGTCC	MEME-3	chr1B	499875165	499875179	+	8.02439	6.71e-05	0.175	ATATTGAATAAGTAT	52	IP_peak_2129	chr1B	499875107	499875492	386	499875113	12.12	3.27879	4.79185	1.75235	Promoter (<=1kb)	chr1B	499873928	499874287	360	1	-	TraesCS1B02G509100LC	TraesCS1B02G509100LC.1	-826
WTTTYCTCYAAGTCC	MEME-3	chr5A	643030758	643030772	+	8.02439	6.71e-05	0.175	ATATTGAATAAGTAT	0	IP_peak_17798	chr5A	643030604	643030927	324	643030761	9.52	6.85175	9.48519	5.59069	Promoter (1-2kb)	chr5A	643028162	643028858	697	2	-	TraesCS5A02G462200	TraesCS5A02G462200.1	-1903
WTTTYCTCYAAGTCC	MEME-3	chr6D	14421561	14421575	-	8.0122	6.74e-05	0.175	ATTTTGTAAAAGTTC	12	IP_peak_23463	chr6D	14421144	14421633	490	14421549	6.92	5.4791	6.32584	2.93935	Promoter (<=1kb)	chr6D	14422006	14423465	1460	1	+	TraesCS6D02G034400	TraesCS6D02G034400.1	-457
WTTTYCTCYAAGTCC	MEME-3	chr1D	143315143	143315157	+	8.0122	6.74e-05	0.175	ATTTTGTAAAAGTTC	-20	IP_peak_2900	chr1D	143315105	143315359	255	143315177	9.52	6.21934	8.43503	4.72946	Promoter (<=1kb)	chr1D	143315821	143319129	3309	5	+	TraesCS1D02G129800	TraesCS1D02G129800.1	-644
WTTTYCTCYAAGTCC	MEME-3	chr7A	707101508	707101522	-	8.0122	6.74e-05	0.175	TATTTTATTAAGTAT	-36	IP_peak_25957	chr7A	707101435	707101833	399	707101558	19.04	10.0191	18.7993	14.3011	Promoter (<=1kb)	chr7A	707099705	707100773	1069	1	-	TraesCS7A02G524800	TraesCS7A02G524800.1	-785
WTTTYCTCYAAGTCC	MEME-3	chr7B	742416380	742416394	-	8	6.77e-05	0.175	ACATTTTTCAAGTCC	1	IP_peak_27547	chr7B	742416185	742416463	279	742416379	6.06	4.53124	5.68954	2.49828	Promoter (1-2kb)	chr7B	742417680	742425797	8118	2	+	TraesCS7B02G814100LC	TraesCS7B02G814100LC.1	-1301
WTTTYCTCYAAGTCC	MEME-3	chr2D	420738875	420738889	+	7.9878	6.8e-05	0.176	AATTTGACAAAGTTT	-33	IP_peak_7708	chr2D	420738733	420739000	268	420738922	6.06	4.66483	5.92621	2.69714	Promoter (<=1kb)	chr2D	420739149	420741885	2737	4	+	TraesCS2D02G327500	TraesCS2D02G327500.1	-227
WTTTYCTCYAAGTCC	MEME-3	chr5B	21156665	21156679	+	7.96341	6.85e-05	0.176	CTTTCTTAAAAGTCC	-129	IP_peak_18043	chr5B	21156664	21156906	243	21156808	10.38	6.82092	9.78691	5.87046	Promoter (<=1kb)	chr5B	21154700	21156235	1536	2	-	TraesCS5B02G030000LC	TraesCS5B02G030000LC.1	-573
WTTTYCTCYAAGTCC	MEME-3	chr7D	20944370	20944384	-	7.95122	6.88e-05	0.176	ATATTTAATAAGTAT	-43	IP_peak_27641	chr7D	20944264	20944585	322	20944427	9.52	5.25952	6.95302	3.47631	Promoter (<=1kb)	chr7D	20944745	20950337	5593	5	+	TraesCS7D02G041600	TraesCS7D02G041600.1	-318
WTTTYCTCYAAGTCC	MEME-3	chr5A	366718179	366718193	+	7.93902	6.91e-05	0.176	TTTTTTCCTATGTAA	40	IP_peak_17127	chr5A	366717934	366718254	321	366718139	6.06	6.04984	9.21445	5.3363	Promoter (1-2kb)	chr5A	366711731	366716948	5218	9	-	TraesCS5A02G173400	TraesCS5A02G173400.1	-1191
WTTTYCTCYAAGTCC	MEME-3	chr1B	424529572	424529586	-	7.93902	6.91e-05	0.176	TTTAATTATAAGTCT	-6	IP_peak_1988	chr1B	424529309	424529652	344	424529592	5.19	4.80046	6.19131	2.84184	Promoter (1-2kb)	chr1B	424527602	424528033	432	1	-	TraesCS1B02G437100LC	TraesCS1B02G437100LC.1	-1559
WTTTYCTCYAAGTCC	MEME-3	chr7D	484439360	484439374	+	7.93902	6.91e-05	0.176	TTATGCTCTAAGTTA	-211	IP_peak_28537	chr7D	484439261	484439685	425	484439585	10.38	6.01695	8.5009	4.79101	Promoter (<=1kb)	chr7D	484430671	484438632	7962	5	-	TraesCS7D02G374100	TraesCS7D02G374100.1	-953
WTTTYCTCYAAGTCC	MEME-3	chr3D	558267173	558267187	+	7.93902	6.91e-05	0.176	ATTTTTTAAAAGTTC	96	IP_peak_12463	chr3D	558266890	558267229	340	558267077	11.25	5.79166	8.55828	4.84154	Promoter (<=1kb)	chr3D	558268042	558268371	330	1	+	TraesCS3D02G544600LC	TraesCS3D02G544600LC.1	-965
WTTTYCTCYAAGTCC	MEME-3	chr3D	599175626	599175640	-	7.93902	6.91e-05	0.176	TTTTAGTCAAAGTTT	32	IP_peak_12644	chr3D	599175529	599175795	267	599175594	12.98	4.66017	6.6833	3.25404	Promoter (<=1kb)	chr3D	599176167	599178611	2445	3	+	TraesCS3D02G515800	TraesCS3D02G515800.1	-573
WTTTYCTCYAAGTCC	MEME-3	chr3A	733733669	733733683	+	7.93902	6.91e-05	0.176	ATTTTTTAAAAGTTC	3	IP_peak_9758	chr3A	733733507	733733795	289	733733666	7.79	4.39416	4.98931	1.91819	Promoter (1-2kb)	chr3A	733730766	733732233	1468	3	-	TraesCS3A02G515800	TraesCS3A02G515800.1	-1433
WTTTYCTCYAAGTCC	MEME-3	chr5B	438556787	438556801	+	7.91463	6.97e-05	0.177	AATTTTACAAAGTTT	182	IP_peak_18800	chr5B	438556355	438556890	536	438556605	6.92	6.79165	9.21445	5.3363	Promoter (<=1kb)	chr5B	438557050	438558045	996	1	+	TraesCS5B02G255900	TraesCS5B02G255900.1	-445
WTTTYCTCYAAGTCC	MEME-3	chr6D	44814754	44814768	+	7.90244	7e-05	0.177	AATTTGAACAAGTTT	0	IP_peak_23571	chr6D	44814673	44814942	270	44814755	6.92	6.79165	9.21445	5.3363	Promoter (1-2kb)	chr6D	44815791	44817977	2187	3	+	TraesCS6D02G087600LC	TraesCS6D02G087600LC.1	-1036
WTTTYCTCYAAGTCC	MEME-3	chr4D	131371394	131371408	-	7.90244	7e-05	0.177	TTATTGTTTATGTCT	-148	IP_peak_15817	chr4D	131371302	131371645	344	131371556	12.98	4.66017	6.6833	3.25404	Promoter (<=1kb)	chr4D	131372330	131375891	3562	7	+	TraesCS4D02G143800	TraesCS4D02G143800.1	-774
WTTTYCTCYAAGTCC	MEME-3	chr3B	148501926	148501940	+	7.90244	7e-05	0.177	ATAATTCCCAAGTTT	76	IP_peak_10190	chr3B	148501732	148502077	346	148501850	10.38	6.16221	8.72829	4.99882	Promoter (1-2kb)	chr3B	148498167	148500304	2138	7	-	TraesCS3B02G155800	TraesCS3B02G155800.1	-1546
WTTTYCTCYAAGTCC	MEME-3	chr2D	154290822	154290836	-	7.89024	7.03e-05	0.177	TTTTTTTCAATGTCA	7	IP_peak_7296	chr2D	154290608	154291031	424	154290815	6.06	5.98906	9.01018	5.25107	Promoter (1-2kb)	chr2D	154291950	154292813	864	2	+	TraesCS2D02G202300	TraesCS2D02G202300.1	-1135
WTTTYCTCYAAGTCC	MEME-3	chr1A	432987809	432987823	+	7.89024	7.03e-05	0.177	TTATTTGACAAGTAT	-48	IP_peak_806	chr1A	432987724	432988105	382	432987871	5.19	4.56375	5.67501	2.48554	Promoter (<=1kb)	chr1A	432973060	432987608	14549	15	-	TraesCS1A02G245000	TraesCS1A02G245000.3	-263
WTTTYCTCYAAGTCC	MEME-3	chr3A	688272748	688272762	+	7.89024	7.03e-05	0.177	AACTCGTCCAAGTAA	72	IP_peak_9569	chr3A	688272450	688272779	330	688272676	10.38	5.69221	7.99793	4.33317	Promoter (1-2kb)	chr3A	688274167	688275469	1303	4	+	TraesCS3A02G595100LC	TraesCS3A02G595100LC.1	-1491
WTTTYCTCYAAGTCC	MEME-3	chr6A	565567647	565567661	+	7.87805	7.07e-05	0.177	CTTTTGTTCAAGTTC	27	IP_peak_21919	chr6A	565567357	565567733	377	565567620	12.98	5.97947	8.68779	4.96	Promoter (1-2kb)	chr6A	565569586	565570992	1407	1	+	TraesCS6A02G335000	TraesCS6A02G335000.1	-1966
WTTTYCTCYAAGTCC	MEME-3	chr1B	24355310	24355324	+	7.86585	7.09e-05	0.177	ATTTTTTATATGTCA	133	IP_peak_1344	chr1B	24355137	24355391	255	24355177	10.38	4.44512	6.09157	2.74797	Promoter (<=1kb)	chr1B	24352213	24354805	2593	4	-	TraesCS1B02G044400	TraesCS1B02G044400.2	-372
WTTTYCTCYAAGTCC	MEME-3	chr7A	169027190	169027204	+	7.86585	7.09e-05	0.177	ATTTTTTATATGTCA	157	IP_peak_24871	chr7A	169027015	169027273	259	169027033	4.33	4.3555	5.41801	2.24976	Promoter (<=1kb)	chr7A	169025668	169026302	635	1	-	TraesCS7A02G206500	TraesCS7A02G206500.1	-731
WTTTYCTCYAAGTCC	MEME-3	chr1A	494447257	494447271	-	7.86585	7.09e-05	0.177	CTATCTTCTATGTTC	200	IP_peak_958	chr1A	494446994	494447418	425	494447057	4.33	4.56623	6.03134	2.69714	Promoter (<=1kb)	chr1A	494446691	494447005	315	1	-	TraesCS1A02G443100LC	TraesCS1A02G443100LC.1	-52
WTTTYCTCYAAGTCC	MEME-3	chr2B	699288848	699288862	-	7.86585	7.09e-05	0.177	TTTTTCTCCAATTTC	-36	IP_peak_6618	chr2B	699288753	699289155	403	699288898	8.65	5.78396	7.39136	3.87996	Promoter (1-2kb)	chr2B	699281542	699286967	5426	15	-	TraesCS2B02G505400	TraesCS2B02G505400.3	-1931
WTTTYCTCYAAGTCC	MEME-3	chr5A	41421807	41421821	+	7.84146	7.15e-05	0.177	AATTTAAATAAGTAC	31	IP_peak_16612	chr5A	41421674	41421953	280	41421776	7.79	5.26548	6.25917	2.90391	Promoter (1-2kb)	chr5A	41423386	41427720	4335	7	+	TraesCS5A02G046100	TraesCS5A02G046100.1	-1610
WTTTYCTCYAAGTCC	MEME-3	chr5D	188823620	188823634	-	7.82927	7.18e-05	0.177	ATTTACACTATGTTT	38	IP_peak_19769	chr5D	188823456	188823734	279	188823582	7.79	7.53345	10.897	6.85299	Promoter (<=1kb)	chr5D	188823928	188833933	10006	7	+	TraesCS5D02G124400	TraesCS5D02G124400.1	-346
WTTTYCTCYAAGTCC	MEME-3	chr5A	459744244	459744258	-	7.81707	7.22e-05	0.177	TTTTGTTATATGTCC	-110	IP_peak_17341	chr5A	459744144	459744424	281	459744368	8.65	4.82684	5.94877	2.69714	Promoter (<=1kb)	chr5A	459745309	459745857	549	2	+	TraesCS5A02G246400	TraesCS5A02G246400.1	-941
WTTTYCTCYAAGTCC	MEME-3	chr7D	64550713	64550727	+	7.80488	7.25e-05	0.177	ATTTTGTTTATGTTC	223	IP_peak_27785	chr7D	64550467	64550780	314	64550490	12.98	3.49513	4.79185	1.75235	Promoter (<=1kb)	chr7D	64551271	64551570	300	1	+	TraesCS7D02G135900LC	TraesCS7D02G135900LC.1	-781
WTTTYCTCYAAGTCC	MEME-3	chr4B	633758817	633758831	-	7.79268	7.28e-05	0.177	AATTTTCCAAAGTTT	-71	IP_peak_15423	chr4B	633758650	633759402	753	633758902	12.98	9.52137	14.2657	10.0284	Promoter (<=1kb)	chr4B	633759874	633761093	1220	2	+	TraesCS4B02G340500	TraesCS4B02G340500.1	-972
WTTTYCTCYAAGTCC	MEME-3	chr7B	505373031	505373045	-	7.78049	7.31e-05	0.177	TTTTACCCAAAGTAT	123	IP_peak_26982	chr7B	505372815	505373058	244	505372908	9.52	7.88226	11.4474	7.37423	Promoter (1-2kb)	chr7B	505370801	505371049	249	1	-	TraesCS7B02G477000LC	TraesCS7B02G477000LC.1	-1859
WTTTYCTCYAAGTCC	MEME-3	chr7A	154334804	154334818	+	7.76829	7.34e-05	0.177	TTTTTTAATATGTAC	0	IP_peak_24837	chr7A	154334215	154334943	729	154334804	10.38	5.69221	7.99793	4.33317	Promoter (<=1kb)	chr7A	154329966	154334011	4046	5	-	TraesCS7A02G194800	TraesCS7A02G194800.1	-793
WTTTYCTCYAAGTCC	MEME-3	chr1A	486338351	486338365	+	7.7561	7.37e-05	0.177	TTTTACTTTATGTCT	-152	IP_peak_929	chr1A	486338338	486338672	335	486338517	11.25	7.4388	11.2104	7.15083	Promoter (<=1kb)	chr1A	486338882	486343058	4177	9	+	TraesCS1A02G289000	TraesCS1A02G289000.1	-365
WTTTYCTCYAAGTCC	MEME-3	chr6D	380707243	380707257	+	7.73171	7.43e-05	0.177	TTTTTTATCATGTCT	-71	IP_peak_24091	chr6D	380707195	380707426	232	380707328	13.85	7.84642	11.9958	7.89354	Promoter (<=1kb)	chr6D	380704652	380706645	1994	6	-	TraesCS6D02G271900	TraesCS6D02G271900.1	-683
WTTTYCTCYAAGTCC	MEME-3	chr5B	2579827	2579841	+	7.70732	7.5e-05	0.177	ATATTGAACAAGTAT	-13	IP_peak_17997	chr5B	2579717	2579944	228	2579854	12.12	5.1209	7.90674	4.26402	Promoter (1-2kb)	chr5B	2581312	2585281	3970	13	+	TraesCS5B02G001800	TraesCS5B02G001800.1	-1458
WTTTYCTCYAAGTCC	MEME-3	chr5D	5791569	5791583	+	7.70732	7.5e-05	0.177	ATATTGAACAAGTAT	-36	IP_peak_19436	chr5D	5791551	5791803	253	5791619	12.12	3.27879	4.79185	1.75235	Promoter (<=1kb)	chr5D	5792275	5795547	3273	4	+	TraesCS5D02G006900	TraesCS5D02G006900.1	-656
WTTTYCTCYAAGTCC	MEME-3	chr7D	34370361	34370375	+	7.70732	7.5e-05	0.177	ATATTGAACAAGTAT	-2	IP_peak_27700	chr7D	34370141	34370410	270	34370377	9.52	4.10723	5.23789	2.10599	Promoter (1-2kb)	chr7D	34371662	34375794	4133	6	+	TraesCS7D02G063200	TraesCS7D02G063200.1	-1285
WTTTYCTCYAAGTCC	MEME-3	chr2A	118249362	118249376	-	7.70732	7.5e-05	0.177	ATATTGAACAAGTAT	-103	IP_peak_3938	chr2A	118249345	118249602	258	118249479	10.38	4.86911	6.74011	3.30472	Promoter (<=1kb)	chr2A	118250441	118250668	228	1	+	TraesCS2A02G174400LC	TraesCS2A02G174400LC.1	-962
WTTTYCTCYAAGTCC	MEME-3	chr4D	132772768	132772782	+	7.70732	7.5e-05	0.177	ATATTGAACAAGTAT	191	IP_peak_15820	chr4D	132772523	132773044	522	132772577	9.52	5.25952	6.95302	3.47631	Promoter (1-2kb)	chr4D	132774571	132778570	4000	10	+	TraesCS4D02G144400	TraesCS4D02G144400.1	-1994
WTTTYCTCYAAGTCC	MEME-3	chr5D	529213787	529213801	-	7.70732	7.5e-05	0.177	ATATTGAACAAGTAT	-8	IP_peak_20562	chr5D	529213637	529213935	299	529213809	9.52	8.01622	11.7383	7.64491	Promoter (1-2kb)	chr5D	529215266	529219337	4072	8	+	TraesCS5D02G500800	TraesCS5D02G500800.1	-1457
WTTTYCTCYAAGTCC	MEME-3	chr5D	542994190	542994204	-	7.70732	7.5e-05	0.177	ATATTGAACAAGTAT	17	IP_peak_20601	chr5D	542993967	542994363	397	542994173	7.79	6.27098	7.93129	4.28499	Promoter (1-2kb)	chr5D	542990667	542992573	1907	5	-	TraesCS5D02G522300	TraesCS5D02G522300.1	-1600
WTTTYCTCYAAGTCC	MEME-3	chr7B	591947551	591947565	-	7.70732	7.5e-05	0.177	ATATTGAACAAGTAT	99	IP_peak_27140	chr7B	591947276	591947608	333	591947452	6.06	4.34462	5.37022	2.22818	Promoter (1-2kb)	chr7B	591949437	591950284	848	1	+	TraesCS7B02G336900	TraesCS7B02G336900.1	-1985
WTTTYCTCYAAGTCC	MEME-3	chr5B	684468519	684468533	-	7.70732	7.5e-05	0.177	ATATTGAACAAGTAT	33	IP_peak_19311	chr5B	684468440	684468687	248	684468486	10.38	5.69221	7.99793	4.33317	Promoter (1-2kb)	chr5B	684466627	684466998	372	1	-	TraesCS5B02G746900LC	TraesCS5B02G746900LC.1	-1488
WTTTYCTCYAAGTCC	MEME-3	chr2B	699221135	699221149	-	7.70732	7.5e-05	0.177	ATATTGAACAAGTAT	70	IP_peak_6617	chr2B	699220845	699221186	342	699221065	7.79	5.41005	6.48178	3.07661	Promoter (1-2kb)	chr2B	699216325	699219825	3501	2	-	TraesCS2B02G505200	TraesCS2B02G505200.1	-1240
WTTTYCTCYAAGTCC	MEME-3	chr2B	589088454	589088468	+	7.68293	7.56e-05	0.178	ATATTCAACATGTCT	233	IP_peak_6368	chr2B	589088045	589088599	555	589088221	12.98	6.60994	9.62777	5.72452	Promoter (1-2kb)	chr2B	589089255	589091957	2703	5	+	TraesCS2B02G413400	TraesCS2B02G413400.1	-1034
WTTTYCTCYAAGTCC	MEME-3	chr4A	94822180	94822194	-	7.64634	7.66e-05	0.179	TTTTTCAAAAAGTTC	-64	IP_peak_12927	chr4A	94822111	94822356	246	94822258	8.65	6.67599	8.88947	5.14526	Promoter (1-2kb)	chr4A	94823286	94825252	1967	2	+	TraesCS4A02G088900	TraesCS4A02G088900.1	-1028
WTTTYCTCYAAGTCC	MEME-3	chr7B	217803441	217803455	-	7.63415	7.69e-05	0.179	CTTTTTTCTATGTTT	20	IP_peak_26513	chr7B	217803324	217803630	307	217803421	5.19	4.71888	6.00646	2.69714	Promoter (1-2kb)	chr7B	217799863	217802347	2485	7	-	TraesCS7B02G159700	TraesCS7B02G159700.1	-1074
WTTTYCTCYAAGTCC	MEME-3	chr7A	119519178	119519192	+	7.62195	7.72e-05	0.179	TTTTAGTGTAAGTCC	-18	IP_peak_24762	chr7A	119519111	119519383	273	119519210	29.42	6.0845	16.0393	11.7083	Promoter (<=1kb)	chr7A	119519318	119521012	1695	5	+	TraesCS7A02G220400LC	TraesCS7A02G220400LC.2	-108
WTTTYCTCYAAGTCC	MEME-3	chr2B	508240532	508240546	+	7.62195	7.72e-05	0.179	ATTTCCAAAAAGTTC	10	IP_peak_6241	chr2B	508240464	508240687	224	508240522	9.52	5.55958	7.40679	3.8892	Promoter (<=1kb)	chr2B	508241210	508246967	5758	14	+	TraesCS2B02G356200	TraesCS2B02G356200.1	-688
WTTTYCTCYAAGTCC	MEME-3	chr2D	32549504	32549518	-	7.59756	7.78e-05	0.18	TTTTTTTAAATGTCC	-9	IP_peak_7005	chr2D	32549363	32549667	305	32549527	9.52	7.27444	10.2419	6.26689	Promoter (<=1kb)	chr2D	32540817	32549164	8348	7	-	TraesCS2D02G076100	TraesCS2D02G076100.2	-363
WTTTYCTCYAAGTCC	MEME-3	chr2A	572481923	572481937	+	7.59756	7.78e-05	0.18	TTTTCAGAAAAGTCC	156	IP_peak_4649	chr2A	572481672	572481951	280	572481767	9.52	7.27444	10.2419	6.26689	Promoter (<=1kb)	chr2A	572479123	572480776	1654	2	-	TraesCS2A02G338100	TraesCS2A02G338100.1	-991
WTTTYCTCYAAGTCC	MEME-3	chr1B	603088960	603088974	+	7.59756	7.78e-05	0.18	TTTTTATACATGTCT	-73	IP_peak_2354	chr1B	603088588	603089122	535	603089047	6.92	5.16074	5.80523	2.60873	Promoter (1-2kb)	chr1B	603085111	603087432	2322	2	-	TraesCS1B02G372300	TraesCS1B02G372300.1	-1615
WTTTYCTCYAAGTCC	MEME-3	chr1A	42449711	42449725	+	7.57317	7.85e-05	0.18	TATTTTTCTAACTCT	-95	IP_peak_133	chr1A	42449670	42449923	254	42449820	6.92	6.79165	9.21445	5.3363	Promoter (1-2kb)	chr1A	42451594	42452418	825	1	+	TraesCS1A02G085400LC	TraesCS1A02G085400LC.1	-1774
WTTTYCTCYAAGTCC	MEME-3	chr5B	58899489	58899503	-	7.57317	7.85e-05	0.18	ATATTTTTTATGTCT	66	IP_peak_18130	chr5B	58898916	58899826	911	58899423	10.38	4.86911	6.74011	3.30472	Promoter (<=1kb)	chr5B	58895657	58898670	3014	2	-	TraesCS5B02G053900	TraesCS5B02G053900.1	-753
WTTTYCTCYAAGTCC	MEME-3	chr2B	329278002	329278016	+	7.57317	7.85e-05	0.18	TTTTAGTATATGTCT	-1	IP_peak_5951	chr2B	329277867	329278226	360	329278017	6.92	6.72341	9.01018	5.25107	Promoter (<=1kb)	chr2B	329278847	329279158	312	1	+	TraesCS2B02G382400LC	TraesCS2B02G382400LC.1	-830
WTTTYCTCYAAGTCC	MEME-3	chr2D	595427711	595427725	+	7.57317	7.85e-05	0.18	TATTTTTCTAATTCT	182	IP_peak_8074	chr2D	595427429	595427856	428	595427529	8.65	4.82684	5.94877	2.69714	Promoter (<=1kb)	chr2D	595427937	595432293	4357	5	+	TraesCS2D02G501000	TraesCS2D02G501000.1	-408
WTTTYCTCYAAGTCC	MEME-3	chr4B	642167389	642167403	+	7.57317	7.85e-05	0.18	ATATTTTTTATGTCT	24	IP_peak_15456	chr4B	642167067	642167459	393	642167365	9.52	7.27444	10.2419	6.26689	Promoter (1-2kb)	chr4B	642168978	642169684	707	2	+	TraesCS4B02G348700	TraesCS4B02G348700.1	-1613
WTTTYCTCYAAGTCC	MEME-3	chr1B	666248856	666248870	-	7.57317	7.85e-05	0.18	ATATTTTTTATGTCT	-71	IP_peak_2513	chr1B	666248775	666249112	338	666248941	11.25	8.47132	13.0666	8.8809	Promoter (1-2kb)	chr1B	666243269	666247479	4211	12	-	TraesCS1B02G446100	TraesCS1B02G446100.1	-1462
WTTTYCTCYAAGTCC	MEME-3	chr2A	700978860	700978874	+	7.57317	7.85e-05	0.18	ATATTTTTTATGTCT	-83	IP_peak_4932	chr2A	700978815	700979136	322	700978957	15.58	8.18248	13.5617	9.3555	Promoter (1-2kb)	chr2A	700980271	700989852	9582	11	+	TraesCS2A02G451500	TraesCS2A02G451500.1	-1314
WTTTYCTCYAAGTCC	MEME-3	chr7B	714489000	714489014	-	7.57317	7.85e-05	0.18	TATTTTTCTAATTCT	-42	IP_peak_27450	chr7B	714488835	714489338	504	714489056	8.65	6.67599	8.88947	5.14526	Promoter (<=1kb)	chr7B	714488078	714488299	222	1	-	TraesCS7B02G764200LC	TraesCS7B02G764200LC.1	-757
WTTTYCTCYAAGTCC	MEME-3	chr7A	632541471	632541485	+	7.56098	7.89e-05	0.18	TATACAACCAAGTCA	34	IP_peak_25745	chr7A	632541291	632541540	250	632541437	6.06	3.7301	4.38647	1.51708	Promoter (1-2kb)	chr7A	632543126	632545059	1934	2	+	TraesCS7A02G438200	TraesCS7A02G438200.1	-1689
WTTTYCTCYAAGTCC	MEME-3	chr4D	19686876	19686890	-	7.53659	7.95e-05	0.181	TTTTTTTCTAAATAC	0	IP_peak_15630	chr4D	19686815	19687050	236	19686886	10.38	4.44512	6.09157	2.74797	Promoter (<=1kb)	chr4D	19685442	19686339	898	2	-	TraesCS4D02G042100	TraesCS4D02G042100.1	-547
WTTTYCTCYAAGTCC	MEME-3	chr6D	428404253	428404267	-	7.53659	7.95e-05	0.181	TTTTTTTCTAACTAC	85	IP_peak_24205	chr6D	428404092	428404367	276	428404168	4.33	4.56623	6.03134	2.69714	Promoter (<=1kb)	chr6D	428404510	428413603	9094	20	+	TraesCS6D02G320100	TraesCS6D02G320100.1	-342
WTTTYCTCYAAGTCC	MEME-3	chr4A	590350607	590350621	-	7.53659	7.95e-05	0.181	TTTTTATTTAAGTTT	152	IP_peak_13889	chr4A	590350265	590350717	453	590350455	16.44	5.80021	10.228	6.26571	Promoter (1-2kb)	chr4A	590352393	590354767	2375	5	+	TraesCS4A02G443500LC	TraesCS4A02G443500LC.1	-1938
WTTTYCTCYAAGTCC	MEME-3	chr2B	397513853	397513867	-	7.52439	7.99e-05	0.181	TATCTGTCCATGTCA	37	IP_peak_6030	chr2B	397513594	397513889	296	397513816	6.06	5.37835	7.35958	3.85322	Promoter (<=1kb)	chr2B	397512300	397513304	1005	2	-	TraesCS2B02G448900LC	TraesCS2B02G448900LC.1	-512
WTTTYCTCYAAGTCC	MEME-3	chr3B	814275903	814275917	+	7.52439	7.99e-05	0.181	AATTTTTCTAAGTGT	40	IP_peak_11362	chr3B	814275721	814275970	250	814275863	10.38	6.82092	9.78691	5.87046	Promoter (1-2kb)	chr3B	814266347	814274743	8397	4	-	TraesCS3B02G588200	TraesCS3B02G588200.1	-1120
WTTTYCTCYAAGTCC	MEME-3	chr1A	494454404	494454418	+	7.5122	8.02e-05	0.181	TATTTAAATAAGTTC	97	IP_peak_959	chr1A	494454210	494454433	224	494454307	4.33	4.56623	6.03134	2.69714	Promoter (1-2kb)	chr1A	494449856	494452574	2719	2	-	TraesCS1A02G299600	TraesCS1A02G299600.1	-1733
WTTTYCTCYAAGTCC	MEME-3	chr2A	61664906	61664920	+	7.45122	8.19e-05	0.182	TTTTCGTTTATGTCA	20	IP_peak_3819	chr2A	61664811	61665418	608	61664886	6.92	6.25026	7.81133	4.17224	Promoter (<=1kb)	chr2A	61660933	61664571	3639	6	-	TraesCS2A02G112400LC	TraesCS2A02G112400LC.1	-315
WTTTYCTCYAAGTCC	MEME-3	chr3D	603746943	603746957	-	7.45122	8.19e-05	0.182	TTTTTACACAAGTCA	-10	IP_peak_12670	chr3D	603746825	603747267	443	603746967	4.33	4.56623	6.03134	2.69714	Promoter (<=1kb)	chr3D	603739964	603746617	6654	9	-	TraesCS3D02G522800	TraesCS3D02G522800.1	-350
WTTTYCTCYAAGTCC	MEME-3	chr2B	480010196	480010210	-	7.43902	8.22e-05	0.183	AGATACTCCATGTCC	-135	IP_peak_6183	chr2B	480010087	480010371	285	480010345	7.79	4.39416	4.98931	1.91819	Promoter (1-2kb)	chr2B	480012301	480013069	769	3	+	TraesCS2B02G528000LC	TraesCS2B02G528000LC.1	-1956
WTTTYCTCYAAGTCC	MEME-3	chr4B	574177134	574177148	-	7.41463	8.29e-05	0.183	TTTTTTCCAATGTAC	21	IP_peak_15285	chr4B	574177110	574177510	401	574177113	7.79	4.39416	4.98931	1.91819	Promoter (<=1kb)	chr4B	574174342	574176487	2146	3	-	TraesCS4B02G289200	TraesCS4B02G289200.1	-626
WTTTYCTCYAAGTCC	MEME-3	chr3D	321889412	321889426	+	7.40244	8.32e-05	0.183	ACTCCCACTATGTCC	-2	IP_peak_12003	chr3D	321889181	321889497	317	321889428	4.33	4.56623	6.03134	2.69714	Promoter (<=1kb)	chr3D	321882987	321888516	5530	6	-	TraesCS3D02G233400	TraesCS3D02G233400.1	-912
WTTTYCTCYAAGTCC	MEME-3	chr1D	430575043	430575057	-	7.39024	8.36e-05	0.183	TTTTTTTCAAAGTTG	-75	IP_peak_3365	chr1D	430574983	430575276	294	430575132	9.52	6.30244	8.56867	4.84706	Promoter (1-2kb)	chr1D	430564985	430573646	8662	13	-	TraesCS1D02G341000	TraesCS1D02G341000.1	-1486
WTTTYCTCYAAGTCC	MEME-3	chr3B	625204837	625204851	-	7.39024	8.36e-05	0.183	TTTTTTTCAAAGTTG	-22	IP_peak_10896	chr3B	625204800	625205039	240	625204873	12.98	6.99026	10.1966	6.23501	Promoter (1-2kb)	chr3B	625200420	625203007	2588	2	-	TraesCS3B02G396200	TraesCS3B02G396200.1	-1866
WTTTYCTCYAAGTCC	MEME-3	chr6D	24264221	24264235	+	7.36585	8.42e-05	0.184	TTTTTCTTCACGTAT	14	IP_peak_23503	chr6D	24263922	24264411	490	24264207	12.12	6.55758	10.1966	6.23501	Promoter (1-2kb)	chr6D	24261731	24262692	962	3	-	TraesCS6D02G050300	TraesCS6D02G050300.1	-1515
WTTTYCTCYAAGTCC	MEME-3	chr7B	478487751	478487765	+	7.35366	8.46e-05	0.184	ATCTCGTCCATGTAT	-68	IP_peak_26910	chr7B	478487625	478487930	306	478487833	13.85	4.94863	7.53305	3.97097	Promoter (<=1kb)	chr7B	478481265	478487100	5836	10	-	TraesCS7B02G257700	TraesCS7B02G257700.1	-733
WTTTYCTCYAAGTCC	MEME-3	chr1B	369505347	369505361	-	7.34146	8.49e-05	0.184	ATTTTGAATAAGTAA	149	IP_peak_1886	chr1B	369505114	369505379	266	369505198	10.38	6.82092	9.78691	5.87046	Promoter (1-2kb)	chr1B	369506705	369507100	396	2	+	TraesCS1B02G389400LC	TraesCS1B02G389400LC.1	-1507
WTTTYCTCYAAGTCC	MEME-3	chr4A	647193834	647193848	-	7.34146	8.49e-05	0.184	AAATTGACTATGTAT	101	IP_peak_14053	chr4A	647193548	647193934	387	647193733	17.31	6.10245	11.2084	7.14904	Promoter (<=1kb)	chr4A	647194421	647219850	25430	17	+	TraesCS4A02G372500	TraesCS4A02G372500.1	-688
WTTTYCTCYAAGTCC	MEME-3	chr5A	26152571	26152585	-	7.31707	8.56e-05	0.184	AGATACTCCACGTCC	97	IP_peak_16568	chr5A	26152286	26152592	307	26152474	3.46	3.82443	4.55152	1.54075	Promoter (<=1kb)	chr5A	26150923	26151609	687	1	-	TraesCS5A02G041700LC	TraesCS5A02G041700LC.1	-865
WTTTYCTCYAAGTCC	MEME-3	chrUn	93060455	93060469	-	7.29268	8.63e-05	0.184	ATATTTTATATGTAC	-1	IP_peak_29191	chrUn	93060358	93060752	395	93060470	25.1	5.21914	12.6201	8.46143	Promoter (1-2kb)	chrUn	93056921	93058778	1858	6	-	TraesCSU02G106200	TraesCSU02G106200.1	-1692
WTTTYCTCYAAGTCC	MEME-3	chr7A	547643242	547643256	-	7.28049	8.67e-05	0.184	ATTTTTACAATGTAC	196	IP_peak_25539	chr7A	547642924	547643335	412	547643046	9.52	6.30244	8.56867	4.84706	Promoter (1-2kb)	chr7A	547640429	547641811	1383	2	-	TraesCS7A02G374800	TraesCS7A02G374800.1	-1235
WTTTYCTCYAAGTCC	MEME-3	chr3A	593338407	593338421	-	7.28049	8.67e-05	0.184	ATTTTATTTAAGTTT	-23	IP_peak_9296	chr3A	593338316	593338538	223	593338444	5.19	5.30804	7.58964	3.97097	Promoter (1-2kb)	chr3A	593339817	593341255	1439	3	+	TraesCS3A02G343900	TraesCS3A02G343900.1	-1373
WTTTYCTCYAAGTCC	MEME-3	chr6A	59783011	59783025	-	7.26829	8.7e-05	0.185	TTTTAAAATAAGTCT	-7	IP_peak_20862	chr6A	59782927	59783149	223	59783032	6.92	6.79165	9.21445	5.3363	Promoter (<=1kb)	chr6A	59783313	59788030	4718	4	+	TraesCS6A02G091100	TraesCS6A02G091100.1	-281
WTTTYCTCYAAGTCC	MEME-3	chr6B	213322765	213322779	-	7.26829	8.7e-05	0.185	TAATTTTTTAAGTCG	-126	IP_peak_22529	chr6B	213322671	213323153	483	213322905	14.71	10.8651	17.5575	13.141	Promoter (1-2kb)	chr6B	213324392	213325874	1483	3	+	TraesCS6B02G287500LC	TraesCS6B02G287500LC.1	-1487
WTTTYCTCYAAGTCC	MEME-3	chr7D	46791104	46791118	-	7.2439	8.77e-05	0.185	ATATTTCATAAGTTT	-69	IP_peak_27738	chr7D	46791062	46791292	231	46791187	11.25	5.55727	8.19272	4.52179	Promoter (<=1kb)	chr7D	46791549	46793286	1738	4	+	TraesCS7D02G101800LC	TraesCS7D02G101800LC.1	-362
WTTTYCTCYAAGTCC	MEME-3	chr7D	93080540	93080554	+	7.23171	8.81e-05	0.185	ACATTTACTAAGTAT	-178	IP_peak_27849	chr7D	93080326	93080941	616	93080732	15.58	7.83737	13.0187	8.84037	Promoter (1-2kb)	chr7D	93079055	93079435	381	1	-	TraesCS7D02G181400LC	TraesCS7D02G181400LC.1	-1297
WTTTYCTCYAAGTCC	MEME-3	chr3B	819703077	819703091	+	7.23171	8.81e-05	0.185	TTTTTTTACATGTAT	-72	IP_peak_11378	chr3B	819702800	819703336	537	819703163	12.12	10.3463	17.3444	12.9446	Promoter (1-2kb)	chr3B	819704491	819705396	906	1	+	TraesCS3B02G597100	TraesCS3B02G597100.1	-1328
WTTTYCTCYAAGTCC	MEME-3	chr2A	1199978	1199992	+	7.21951	8.85e-05	0.185	TTTTTTTCCAAATAC	-104	IP_peak_3592	chr2A	1199977	1200269	293	1200096	12.98	4.04861	5.7108	2.51866	Promoter (<=1kb)	chr2A	1198253	1199251	999	1	-	TraesCS2A02G002500LC	TraesCS2A02G002500LC.1	-845
WTTTYCTCYAAGTCC	MEME-3	chr3A	668580773	668580787	+	7.21951	8.85e-05	0.185	TTTTTTTCCAAATAC	26	IP_peak_9491	chr3A	668580604	668580888	285	668580747	11.25	5.79166	8.55828	4.84154	Promoter (1-2kb)	chr3A	668581881	668585304	3424	7	+	TraesCS3A02G426000	TraesCS3A02G426000.2	-1134
WTTTYCTCYAAGTCC	MEME-3	chr3D	574828810	574828824	-	7.20732	8.88e-05	0.186	TTTTTTAACAAGTAA	-142	IP_peak_12518	chr3D	574828574	574829156	583	574828966	7.79	7.18578	9.90484	5.97593	Promoter (1-2kb)	chr3D	574821751	574827185	5435	7	-	TraesCS3D02G473000	TraesCS3D02G473000.1	-1781
WTTTYCTCYAAGTCC	MEME-3	chr3D	600824358	600824372	+	7.20732	8.88e-05	0.186	ATATTGACAAAGTTT	-69	IP_peak_12656	chr3D	600824281	600824590	310	600824441	6.06	6.04984	9.21445	5.3363	Promoter (<=1kb)	chr3D	600825206	600825592	387	1	+	TraesCS3D02G632100LC	TraesCS3D02G632100LC.1	-765
WTTTYCTCYAAGTCC	MEME-3	chr6A	73679049	73679063	+	7.19512	8.92e-05	0.186	TTTATATCCACGTAC	33	IP_peak_20896	chr6A	73678870	73679232	363	73679016	6.92	5.83933	6.97051	3.48617	Promoter (1-2kb)	chr6A	73677408	73677749	342	1	-	TraesCS6A02G138500LC	TraesCS6A02G138500LC.1	-1267
WTTTYCTCYAAGTCC	MEME-3	chr7A	189294646	189294660	-	7.19512	8.92e-05	0.186	ATTTCCTTTATGTTT	-13	IP_peak_24905	chr7A	189294519	189294893	375	189294673	6.92	5.65349	6.6293	3.20911	Promoter (1-2kb)	chr7A	189296014	189302038	6025	6	+	TraesCS7A02G220600	TraesCS7A02G220600.2	-1341
WTTTYCTCYAAGTCC	MEME-3	chr5D	209649337	209649351	+	7.19512	8.92e-05	0.186	AATCCCGCTATGTCA	-123	IP_peak_19790	chr5D	209649315	209649539	225	209649474	10.38	5.69221	7.99793	4.33317	Promoter (<=1kb)	chr5D	209642704	209649175	6472	5	-	TraesCS5D02G132000	TraesCS5D02G132000.1	-299
WTTTYCTCYAAGTCC	MEME-3	chr7D	159075048	159075062	-	7.18293	8.96e-05	0.186	TTTTCAACCATGTTT	68	IP_peak_28002	chr7D	159074794	159075067	274	159074980	9.52	5.55958	7.40679	3.8892	Promoter (<=1kb)	chr7D	159075691	159076281	591	1	+	TraesCS7D02G200700	TraesCS7D02G200700.1	-711
WTTTYCTCYAAGTCC	MEME-3	chr1D	125827755	125827769	+	7.17073	8.99e-05	0.186	ATTTTCTAAAAGTTT	3	IP_peak_2871	chr1D	125827528	125827771	244	125827752	7.79	4.39416	4.98931	1.91819	Promoter (<=1kb)	chr1D	125828654	125831890	3237	8	+	TraesCS1D02G123600	TraesCS1D02G123600.1	-902
WTTTYCTCYAAGTCC	MEME-3	chr5A	436109306	436109320	+	7.17073	8.99e-05	0.186	AATTTTGTTAAGTTT	102	IP_peak_17257	chr5A	436109123	436109398	276	436109204	7.79	6.47712	8.32336	4.64676	Promoter (<=1kb)	chr5A	436102979	436108635	5657	4	-	TraesCS5A02G218000	TraesCS5A02G218000.1	-569
WTTTYCTCYAAGTCC	MEME-3	chr1D	478030754	478030768	+	7.17073	8.99e-05	0.186	TATTTTATCAAGTCG	131	IP_peak_3520	chr1D	478030516	478030838	323	478030623	9.52	5.83467	7.82938	4.18956	Promoter (<=1kb)	chr1D	478031470	478032863	1394	1	+	TraesCS1D02G422500	TraesCS1D02G422500.1	-847
WTTTYCTCYAAGTCC	MEME-3	chr1D	339307973	339307987	+	7.15854	9.03e-05	0.186	TTTTTTGCCATGTTA	-81	IP_peak_3157	chr1D	339307955	339308180	226	339308068	8.65	5.78396	7.39136	3.87996	Promoter (<=1kb)	chr1D	339306288	339307333	1046	1	-	TraesCS1D02G349900LC	TraesCS1D02G349900LC.1	-735
WTTTYCTCYAAGTCC	MEME-3	chr4D	452547389	452547403	-	7.15854	9.03e-05	0.186	ATTTGGTCAAAGTCA	185	IP_peak_16277	chr4D	452547132	452547424	293	452547204	7.79	6.47712	8.32336	4.64676	Promoter (1-2kb)	chr4D	452548206	452548634	429	1	+	TraesCS4D02G384600LC	TraesCS4D02G384600LC.1	-1002
WTTTYCTCYAAGTCC	MEME-3	chr7D	556119154	556119168	+	7.15854	9.03e-05	0.186	AATTCGGTCAAGTTT	118	IP_peak_28689	chr7D	556118995	556119264	270	556119036	6.06	4.22851	5.17727	2.0496	Promoter (1-2kb)	chr7D	556120190	556124226	4037	4	+	TraesCS7D02G436800	TraesCS7D02G436800.1	-1154
WTTTYCTCYAAGTCC	MEME-3	chr5A	673931202	673931216	-	7.14634	9.06e-05	0.187	AAATTGACAAAGTCA	77	IP_peak_17879	chr5A	673931111	673931379	269	673931125	7.79	4.64484	5.34496	2.20598	Promoter (1-2kb)	chr5A	673932484	673935983	3500	5	+	TraesCS5A02G510400	TraesCS5A02G510400.1	-1359
WTTTYCTCYAAGTCC	MEME-3	chr7B	189710785	189710799	-	7.13415	9.1e-05	0.187	ATTTTTTCAAAGTTG	80	IP_peak_26466	chr7B	189710512	189710819	308	189710705	11.25	4.08326	5.86499	2.65755	Promoter (1-2kb)	chr7B	189712387	189718157	5771	10	+	TraesCS7B02G145900	TraesCS7B02G145900.1	-1682
WTTTYCTCYAAGTCC	MEME-3	chr3D	399497069	399497083	+	7.13415	9.1e-05	0.187	ATATTTGCAAAGTTT	-36	IP_peak_12147	chr3D	399497007	399497306	300	399497119	8.65	6.88847	9.28392	5.40077	Promoter (1-2kb)	chr3D	399498934	399499293	360	1	+	TraesCS3D02G380500LC	TraesCS3D02G380500LC.1	-1815
WTTTYCTCYAAGTCC	MEME-3	chr2B	753323015	753323029	-	7.13415	9.1e-05	0.187	TAAATGACCAAGTTT	0	IP_peak_6738	chr2B	753322872	753323239	368	753323015	6.06	5.37835	7.35958	3.85322	Promoter (1-2kb)	chr2B	753324322	753328364	4043	2	+	TraesCS2B02G559300	TraesCS2B02G559300.1	-1307
WTTTYCTCYAAGTCC	MEME-3	chr7A	40573087	40573101	-	7.12195	9.14e-05	0.187	ATATTGAACAAGTTT	-16	IP_peak_24532	chr7A	40572923	40573379	457	40573117	12.12	10.7236	18.3558	13.8815	Promoter (1-2kb)	chr7A	40567409	40571546	4138	8	-	TraesCS7A02G098300LC	TraesCS7A02G098300LC.1	-1571
WTTTYCTCYAAGTCC	MEME-3	chr7D	593409657	593409671	+	7.12195	9.14e-05	0.187	CATTATTTCAAGTCC	0	IP_peak_28808	chr7D	593409560	593409930	371	593409666	10.38	5.69221	7.99793	4.33317	Promoter (<=1kb)	chr7D	593405406	593408842	3437	4	-	TraesCS7D02G656800LC	TraesCS7D02G656800LC.1	-824
WTTTYCTCYAAGTCC	MEME-3	chr2A	716227284	716227298	-	7.12195	9.14e-05	0.187	ATATTGAACAAGTTT	0	IP_peak_4972	chr2A	716227088	716227459	372	716227287	6.92	6.25026	7.81133	4.17224	Promoter (<=1kb)	chr2A	716228008	716230071	2064	2	+	TraesCS2A02G476200	TraesCS2A02G476200.1	-721
WTTTYCTCYAAGTCC	MEME-3	chr2A	1866289	1866303	-	7.09756	9.22e-05	0.188	AATTTTTTTATGTAC	5	IP_peak_3599	chr2A	1866142	1866583	442	1866284	12.12	6.55758	10.1966	6.23501	Promoter (<=1kb)	chr2A	1865158	1865433	276	1	-	TraesCS2A02G004000LC	TraesCS2A02G004000LC.1	-851
WTTTYCTCYAAGTCC	MEME-3	chr3B	422355466	422355480	+	7.09756	9.22e-05	0.188	AATATGCCTACGTAC	20	IP_peak_10578	chr3B	422355368	422355601	234	422355446	7.79	6.93294	9.28856	5.40112	Promoter (1-2kb)	chr3B	422357001	422358227	1227	2	+	TraesCS3B02G416910LC	TraesCS3B02G416910LC.1	-1555
WTTTYCTCYAAGTCC	MEME-3	chr1A	569379328	569379342	+	7.08537	9.26e-05	0.188	ATAATTCATAAGTCT	-52	IP_peak_1193	chr1A	569379094	569379560	467	569379394	7.79	7.53345	10.897	6.85299	Promoter (1-2kb)	chr1A	569376312	569377411	1100	2	-	TraesCS1A02G406900	TraesCS1A02G406900.1	-1983
WTTTYCTCYAAGTCC	MEME-3	chr6D	11213004	11213018	-	7.06098	9.33e-05	0.188	ATTATATCCATGTAC	40	IP_peak_23448	chr6D	11212891	11213130	240	11212964	11.25	5.79166	8.55828	4.84154	Promoter (1-2kb)	chr6D	11214509	11216918	2410	3	+	TraesCS6D02G028400LC	TraesCS6D02G028400LC.1	-1545
WTTTYCTCYAAGTCC	MEME-3	chr6A	335732811	335732825	-	7.06098	9.33e-05	0.188	TTTTCACCCATGTTT	-4	IP_peak_21420	chr6A	335732729	335732956	228	335732829	5.19	5.30804	7.58964	3.97097	Promoter (<=1kb)	chr6A	335733460	335733805	346	2	+	TraesCS6A02G338100LC	TraesCS6A02G338100LC.1	-631
WTTTYCTCYAAGTCC	MEME-3	chr1B	553628919	553628933	+	7.06098	9.33e-05	0.188	TATTTATCAAAGTTT	97	IP_peak_2228	chr1B	553628665	553629036	372	553628822	5.19	4.88492	6.39162	2.99006	Promoter (<=1kb)	chr1B	553629292	553631652	2361	7	+	TraesCS1B02G327400	TraesCS1B02G327400.1	-470
WTTTYCTCYAAGTCC	MEME-3	chr2D	539876810	539876824	-	7.04878	9.37e-05	0.188	ATTTTTTACAAGTTG	0	IP_peak_7950	chr2D	539876344	539877031	688	539876821	8.65	4.82684	5.94877	2.69714	Promoter (1-2kb)	chr2D	539877886	539878386	501	2	+	TraesCS2D02G536900LC	TraesCS2D02G536900LC.1	-1065
WTTTYCTCYAAGTCC	MEME-3	chr3D	611109901	611109915	+	7.04878	9.37e-05	0.188	ATATCTTCAAAGTAA	59	IP_peak_12712	chr3D	611109693	611109962	270	611109842	11.25	7.3394	11.0426	6.99154	Promoter (1-2kb)	chr3D	611111620	611114678	3059	4	+	TraesCS3D02G538300	TraesCS3D02G538300.1	-1778
WTTTYCTCYAAGTCC	MEME-3	chr1B	99601468	99601482	+	7.03659	9.41e-05	0.188	TTTTTCTCCAGGTCA	-164	IP_peak_1512	chr1B	99601451	99601822	372	99601646	11.25	8.47132	13.0666	8.8809	Promoter (1-2kb)	chr1B	99595395	99599830	4436	7	-	TraesCS1B02G095700	TraesCS1B02G095700.2	-1816
WTTTYCTCYAAGTCC	MEME-3	chr1B	368404559	368404573	-	7.02439	9.45e-05	0.188	AAATTGACCATGTAT	194	IP_peak_1885	chr1B	368404123	368404688	566	368404365	13.85	4.94863	7.53305	3.97097	Promoter (<=1kb)	chr1B	368404999	368413620	8622	13	+	TraesCS1B02G204300	TraesCS1B02G204300.1	-634
WTTTYCTCYAAGTCC	MEME-3	chr4D	379346399	379346413	+	7.02439	9.45e-05	0.188	TTTTTGACAATGTTC	46	IP_peak_16113	chr4D	379346175	379346598	424	379346353	8.65	5.10221	6.35342	2.96234	Promoter (1-2kb)	chr4D	379347956	379352449	4494	10	+	TraesCS4D02G222300	TraesCS4D02G222300.1	-1603
WTTTYCTCYAAGTCC	MEME-3	chr5A	399462958	399462972	+	7	9.53e-05	0.188	AATTTTTCCAAATCT	-43	IP_peak_17191	chr5A	399462580	399463081	502	399463015	9.52	5.55958	7.40679	3.8892	Promoter (1-2kb)	chr5A	399453296	399461596	8301	16	-	TraesCS5A02G196200	TraesCS5A02G196200.1	-1419
WTTTYCTCYAAGTCC	MEME-3	chr5D	555634654	555634668	-	6.9878	9.57e-05	0.188	AATTTTCACACGTCT	-124	IP_peak_20640	chr5D	555634637	555634957	321	555634792	6.06	5.87782	8.66056	4.93665	Promoter (1-2kb)	chr5D	555635845	555639490	3646	2	+	TraesCS5D02G547600	TraesCS5D02G547600.1	-1053
WTTTYCTCYAAGTCC	MEME-3	chr2D	650931280	650931294	+	6.97561	9.61e-05	0.188	AATTTCTCCAATTAC	81	IP_peak_8169	chr2D	650931097	650931348	252	650931199	11.25	6.12489	9.08008	5.30512	Promoter (<=1kb)	chr2D	650931852	650947979	16128	42	+	TraesCS2D02G600000	TraesCS2D02G600000.1	-653
WTTTYCTCYAAGTCC	MEME-3	chr2D	137593182	137593196	+	6.96341	9.65e-05	0.188	ATTTTCTTTATGTTT	90	IP_peak_7263	chr2D	137592959	137593218	260	137593092	7.79	7.45776	10.6629	6.6728	Promoter (<=1kb)	chr2D	137590149	137592695	2547	1	-	TraesCS2D02G193100	TraesCS2D02G193100.1	-397
WTTTYCTCYAAGTCC	MEME-3	chr5A	400059886	400059900	-	6.95122	9.69e-05	0.188	TTTTTTTCTAATTTC	35	IP_peak_17192	chr5A	400059653	400060189	537	400059851	10.38	9.30849	14.8582	10.5656	Promoter (<=1kb)	chr5A	400060398	400065202	4805	4	+	TraesCS5A02G310800LC	TraesCS5A02G310800LC.1	-547
WTTTYCTCYAAGTCC	MEME-3	chr2A	133346913	133346927	+	6.93902	9.73e-05	0.188	GTAACTTCAAAGTCC	131	IP_peak_3955	chr2A	133346759	133347146	388	133346782	7.79	4.87467	5.67693	2.48686	Promoter (<=1kb)	chr2A	133343280	133346585	3306	4	-	TraesCS2A02G174400	TraesCS2A02G174400.1	-197
WTTTYCTCYAAGTCC	MEME-3	chr3B	24784868	24784882	-	6.91463	9.81e-05	0.188	AGATTTGCCAAGTAT	77	IP_peak_9916	chr3B	24784648	24784899	252	24784791	6.92	5.01503	5.57871	2.39581	Promoter (<=1kb)	chr3B	24785471	24785740	270	1	+	TraesCS3B02G054900LC	TraesCS3B02G054900LC.1	-680
WTTTYCTCYAAGTCC	MEME-3	chr4B	466061631	466061645	-	6.91463	9.81e-05	0.188	TTTTCGTCAACGTTT	40	IP_peak_15072	chr4B	466061453	466061676	224	466061591	7.79	6.69728	8.77014	5.03769	Promoter (1-2kb)	chr4B	466058377	466059930	1554	1	-	TraesCS4B02G221800	TraesCS4B02G221800.1	-1661
WTTTYCTCYAAGTCC	MEME-3	chr2D	451299556	451299570	-	6.90244	9.86e-05	0.188	TGTTTGTCTATGTAT	207	IP_peak_7754	chr2D	451299252	451299585	334	451299349	3.46	3.82443	4.55152	1.54075	Promoter (1-2kb)	chr2D	451294336	451297986	3651	4	-	TraesCS2D02G353000	TraesCS2D02G353000.1	-1363
WTTTYCTCYAAGTCC	MEME-3	chr4A	482389690	482389704	+	6.90244	9.86e-05	0.188	ATTCTACCCAAGTTT	73	IP_peak_13646	chr4A	482389484	482389729	246	482389617	10.38	5.38251	7.52307	3.97097	Promoter (1-2kb)	chr4A	482391409	482392520	1112	2	+	TraesCS4A02G198000	TraesCS4A02G198000.1	-1792
WTTTYCTCYAAGTCC	MEME-3	chr1A	563294284	563294298	+	6.90244	9.86e-05	0.188	TTATTCTTCATGTTC	-139	IP_peak_1166	chr1A	563294246	563294621	376	563294437	79.61	2.30325	10.8687	6.85299	Promoter (1-2kb)	chr1A	563291736	563292573	838	3	-	TraesCS1A02G567200LC	TraesCS1A02G567200LC.1	-1864
WTTTYCTCYAAGTCC	MEME-3	chr6A	2222685	2222699	+	6.87805	9.94e-05	0.188	CATTTCTCAAAGTTT	24	IP_peak_20715	chr6A	2222535	2222786	252	2222661	6.92	5.74491	6.79464	3.35747	Promoter (<=1kb)	chr6A	2221023	2222302	1280	2	-	TraesCS6A02G005700	TraesCS6A02G005700.1	-359
WTTTYCTCYAAGTCC	MEME-3	chr3B	82369714	82369728	+	6.86585	9.98e-05	0.189	TATTTGTTCAAGTAA	150	IP_peak_10064	chr3B	82369500	82369818	319	82369564	3.46	3.82443	4.55152	1.54075	Promoter (1-2kb)	chr3B	82366504	82367668	1165	3	-	TraesCS3B02G115600	TraesCS3B02G115600.1	-1896
WTTTYCTCYAAGTCC	MEME-3	chr1A	390803377	390803391	+	6.86585	9.98e-05	0.189	TATTATACAAAGTTC	-83	IP_peak_744	chr1A	390803236	390803799	564	390803474	11.25	8.47132	13.0666	8.8809	Promoter (1-2kb)	chr1A	390801603	390801863	261	1	-	TraesCS1A02G353800LC	TraesCS1A02G353800LC.1	-1611
WTTTYCTCYAAGTCC	MEME-3	chr2B	399356554	399356568	-	6.86585	9.98e-05	0.189	CTTTTTTCAAAGTTT	-24	IP_peak_6035	chr2B	399356503	399356753	251	399356592	11.25	6.12489	9.08008	5.30512	Promoter (1-2kb)	chr2B	399353059	399355396	2338	2	-	TraesCS2B02G288800	TraesCS2B02G288800.1	-1196
