# Supplementary material for: The TaBBM-TaWRKY41-TacAGPS1a module affects starch synthesis and grain quality by regulating embryo and endosperm development in wheat
Source: Research Square preprint supplement (doi:10.21203/rs.3.rs-8619315/v1), 2026-01-27
Supplement: Supplementary file 10 [file ee7d5a7d119c0954602258b8.xlsx]

## Sheet: Sheet1
Supplementary Data 10. Primers used in this study.
Primer name	Primer sequence（5'-3')	Description
TaActin-F	AGTCGAGAACGATACCAGTAGTACGA	qRT-PCR
TaActin-R	GCCATGTACGTCGCAATTCA
QBBM-AF	AAGTCTCCAAACTCCAAAGCT
QBBM-AR	CTTAAGCTTGCTGTTGGATAG
QBBM-BF	CCCGGCACAAGCACAA
QBBM-BR	CCAACAAGCGGCGGT
QBBM-BR	CCAACAAGCGGCGGT
QBBM-DF	GTTAGCGATTGTCAGGAAGG
QBBM-DR	CCTCGATGCTGGGGTC
QTaBBM-F	CACATGACAAGGCAGGAGTT
QTaBBM-R	CATGTTGGTGGTGCCTAGTT
QWRKY41-F	gaccatgtcaccgtaccc
QWRKY41-R	gtcgggtcgaactcgaaa
QTaAGPL-Qpcr-F	GCATGATCACAATGTGCAGGCA
QTaAGPL-Qpcr-R	TTCAAACTTTGGAGGCTGCTC
QTacAGPS1a-Qpcr-F	AAACATTCCCCTCGCCCTCA
QTacAGPS1a-Qpcr-R	TACTGCAGGCTTCGCACG
QTaSS3-Qpcr-F	CAGCAACGGCGTGGATTATG
QTaSS3-Qpcr-R	AACTTTCGAGCGGCATGGTA
QTaSuS2-Qpcr-F	GCTACATCTGCGACATGA
QTaSuS2-Qpcr-R	ATATGCAGTGGCGAATGT
YTaBBM-TF	GAATTGTAATACGACTCACTATAGGGTCGAGAGCTATATGCTGCCAATGAG	In situ hybridization
YTaBBM-F	TCGAGAGCTATATGCTGCCAATGAGT
YTaBBM-TR	CTAAGTGCTTTGTGATGTTAGTGTTTCTGAATTGTAATACGACTCACTATAGGG
YTaBBM-R	CTAAGTGCTTTGTGATGTTAGTGTTT
BBMa	agTATTGAACACGACAGTAACACcaggagattcagtttga	amiRNA vector
BBMb	tgGTGTTACTGTCGTGTTCAATActgctgctgctacagcc
BBMc	ctGTGTTTCTGACGTGTTCAATAttcctgctgctaggctg
BBMd	aaTATTGAACACGTCAGAAACACagagaggcaaaagtgaa
G-11491	CACCCAGCAGCAGCCACAGCAAA
G-11494	TACCGCTGCTGATGCTGATGCCAT
BBM-ABDF2	ATGGCCACCGTGAACAACT	OE vector
TaBBM-AR	GTGCATTGTTCTTGGATCTGCTGAGCT
TaBBM-BR	CTAAGTGCTTTGTGATGTTAGTG
TaWRKY41-F	atggagagcgtggagggaaac
TaWRKY41-R	catgaagaagttgggcgcacc
AD-TaWRKY41-F	GCCATGGAGGCCAGTGAATTCatggagagcgtggagggaaac	pGADT7 vector
AD-TaWRKY41-R	CAGCTCGAGCTCGATGGATCCcatgaagaagttgggcgcacc
AD-AHL10-F	GCCATGGAGGCCAGTGAATTCATGGCGGGAAGGGATCTGTTC
AD-AHL10-R	CAGCTCGAGCTCGATGGATCCTTTCCAGGGCATGCTGGACAAG
AD-BBM-F	GCCATGGAGGCCAGTGAATTCATGGCCACCGTGAACAACT
AD-BBM-R	CAGCTCGAGCTCGATGGATCCATTAGTGTCGTTCCAGACGCT
62-TaWRKY41-F	AGGACAGCCCAAGCTGAGCTCatggagagcgtggagggaaac	62SK vector
62-TaWRKY41-R	TTGTAGTCGGATCCACTAGTcatgaagaagttgggcgcacc
62-AHL10-F	AGGACAGCCCAAGCTGAGCTCATGGCGGGAAGGGATCTGTTC
62-AHL10-R	TTGTAGTCGGATCCACTAGTTTTCCAGGGCATGCTGGACAAG
62-BBM-F	AGGACAGCCCAAGCTGAGCTCATGGCCACCGTGAACAACT
62-BBM-R	TTGTAGTCGGATCCACTAGTATTAGTGTCGTTCCAGACGCT
MBP-TaWRKY41-F	GAGGGAAGGATTTCAGAATTCatggagagcgtggagggaaac	MBP vector
MBP-TaWRKY41-R	TGCCTGCAGGTCGACTCTAGAcatgaagaagttgggcgcacc
MBP-AHL10-F	GAGGGAAGGATTTCAGAATTCATGGCGGGAAGGGATCTGTTC
MBP-AHL10-R	TGCCTGCAGGTCGACTCTAGATTTCCAGGGCATGCTGGACAAG
MBP-BBM-F	GAGGGAAGGATTTCAGAATTCATGGCCACCGTGAACAACT
MBP-BBM-R	TGCCTGCAGGTCGACTCTAGAATTAGTGTCGTTCCAGACGCT	abai vector
abai-PBBM-5F	AGCACATGCCTCGAGGTCGACGTCTGAACGCTGAGCAGAATAGG
abai-PBBM-5R	CTTGAATTCGAGCTCGGTACCCTCCCTCTCTCCCGCTAACAA
abai-PBBM-1518F	AGCACATGCCTCGAGGTCGACCAGGTTCAAAATTCATAGATGCACCC
abai-PBBM-1518R	CTTGAATTCGAGCTCGGTACCGAGAGTCCACTTCAGTATGATGAA
abai-pWAKY41-F1	AGCACATGCCTCGAGGTCGACCATAAGACGTAGTTTCATATTTTGTATACT
abai-pWAKY41-R1	CTTGAATTCGAGCTCGGTACCCATCTTATAGAGGCAGAGTTCAAGTCAAG
abai-pcAGPS1a-F	AGCACATGCCTCGAGGTCGACTGTGCTAGCCCGTCAAGTAACAA
abai-pcAGPS1a-R	CTTGAATTCGAGCTCGGTACCTCTGAGATTGTCAGCAGGTG
0800-PBBM-5F	gtcgacggtatcgataagcttGTCTGAACGCTGAGCAGAATAGG	0800 vector
0800-PBBM-5R	cgctctagaactagtggatccCTCCCTCTCTCCCGCTAACAA
0800-PBBM-1518F	gtcgacggtatcgataagcttCAGGTTCAAAATTCATAGATGCACCC
0800-PBBM-1518R	cgctctagaactagtggatccGAGAGTCCACTTCAGTATGATGAA
0800-pWAKY41-F1	gtcgacggtatcgataagcttCATAAGACGTAGTTTCATATTTTGTATACT
0800-pWAKY41-R1	cgctctagaactagtggatccCATCTTATAGAGGCAGAGTTCAAGTCAAG
0800-pcAGPS1a-F	gtcgacggtatcgataagcttTGTGCTAGCCCGTCAAGTAACAA
0800-pcAGPS1a-R	cgctctagaactagtggatccTCTGAGATTGTCAGCAGGTG
pcAGPS1a	TGTGCTAGCCCGTCAAGTAACAA	EMSA probes
M-pcAGPS1a	TGTGCTAGCCCTTTAAGTAACAA
pWAKY41	CCGACCTTTTTACATAAGTACAACAA
M-pWAKY41	CCGACCCCCCCATATAAGTATAACAA
pBBM	TTTTAGAATTTGAATTTTTTGAAAT
M-BBM	TTTTAGAATTTGAAATTTTTGAAAT
